# Supplementary material for: The genetic architecture of language functional connectivity
Source: bioRxiv or medRxiv preprint supplement (doi:10.1101/2021.10.18.464351), 2021-10-19
Supplement: Supplementary file [file media-1.pdf]

| Table    | Contents                                                                                                                                                                                                                     |
|----------|------------------------------------------------------------------------------------------------------------------------------------------------------------------------------------------------------------------------------|
| Table S1 | Overview of the regions obtained from the meta-analysis.                                                                                                                                                                     |
| Table S2 | Heritabilities of of the 300 brain functional connectivity, estimated using the genotyped SNPs information using genome-based restricted maximum likelihood (GREML) as implemented in GCTA.                                  |
| Table S3 | SNPs associated with the 142 heritable functional connectivity measures using MOSTest at the genome-wide significance threshold $p = 5e-8$ .                                                                                 |
| Table S4 | Replication of the 20 lead SNP association using an independent non-British replication dataset (N=4,754) using MOSTest.                                                                                                     |
| Table S5 | For each of the 20 lead SNPs identified in the multivariate GWAS, the corresponding univariate summary statistics for FCs identified as central FC (threshold on the genome-wide significance threshold $p$ value: $5e-8$ ). |
| Table S6 | The SNP-based genetic correlation analysis was estimated using GCTA software, for each pair of central FCs associated to 15q14 or 3p11.1 genetic loci.                                                                       |
| Table S7 | Univariate associations of 2 lead SNPs with diffusion MRI indices.                                                                                                                                                           |
| Table S8 | eQTLs association, performed by FUMA, between the SNPs in the three replicated genomic risk loci and all mapped genes in differents databases.                                                                               |
| Table S9 | Center of mass of the language processing regions of interests retained in both left and right hemispheres.                                                                                                                  |

| Hemisphere                                                      | Regions of interest                                                       | Phonology | Semantic | Sentence |
|-----------------------------------------------------------------|---------------------------------------------------------------------------|-----------|----------|----------|
| Left hemisphere                                                 | Planum temporale (PT)                                                     | x         |          |          |
|                                                                 | <b>Rolandic sulcus (RoIS)</b>                                             | <b>x</b>  |          |          |
|                                                                 | Superior temporal gyrus (T1)                                              | x         |          |          |
|                                                                 | <b>Supramarginalis gyrus (SMG)</b>                                        | <b>x</b>  |          |          |
|                                                                 | <b>Precentral gyrus (Prec)</b>                                            | <b>x</b>  |          |          |
|                                                                 | Dorsal part of the pars triangularis of the inferior frontal gyrus (F3td) | x         |          |          |
|                                                                 | Anterior fusiform gyrus (Fusa)                                            |           | x        |          |
|                                                                 | Opercular part of the inferior frontal gyrus (PrF3op)                     |           | x        |          |
|                                                                 | <b>Angular gyrus (AG)</b>                                                 |           | <b>x</b> |          |
|                                                                 | <b>Pars orbitaris of the left inferior frontal gyrus (F3orb)</b>          |           | <b>x</b> |          |
|                                                                 | <b>Posterior part of the middle frontal gyrus (F2p)</b>                   |           |          | <b>x</b> |
|                                                                 | <b>Posterior ending of the superior temporal gyrus (STSp)</b>             |           |          | <b>x</b> |
|                                                                 | Posterior part of the middle temporal gyrus (T2p)                         |           |          | x        |
|                                                                 | <b>Temporal pole (Pole)</b>                                               |           | <b>x</b> | <b>x</b> |
|                                                                 | <b>Lateral/middle part of T2 (T2ml)</b>                                   |           | <b>x</b> | <b>x</b> |
|                                                                 | <b>Dorsal part of the pars opercularis (F3opd)</b>                        |           | <b>x</b> | <b>x</b> |
|                                                                 | Ventral part of the pars triangularis (F3tv)                              |           | x        | x        |
| <b>Posterior part of the left inferior temporal gyrus (T3p)</b> | <b>x</b>                                                                  | <b>x</b>  |          |          |
| <b>Anterior part of T1 (T1a)</b>                                | <b>x</b>                                                                  | <b>x</b>  | <b>x</b> |          |
| Right hemisphere                                                | Anterior part of the middle frontal gyrus (F2antR)                        | x         |          |          |
|                                                                 | <b>Precentral gyrus (PrecR)</b>                                           | <b>x</b>  |          |          |
|                                                                 | Anterior part of tT1 overlapping the Heschl's gyrus (T1a/HeschlR)         | x         |          |          |
|                                                                 | Superior temporal gyrus (T1R)                                             | x         |          |          |
|                                                                 | Middle part of the STS (T2pR)                                             |           |          | x        |
|                                                                 | Upper part of the pars opercularis of F3 (F3opdR)                         |           | x        | x        |

Note:

Bold phenotypes represents FCs with significant heritability after false discovery rate correction at  $p < 0.05$ .

| Phenotype            | P value    | $h^2$    | SE       | FDR P value            |
|----------------------|------------|----------|----------|------------------------|
| <b>F3opd_SMG</b>     | 3.8858e-16 | 0.143085 | 0.018056 | 1.16574e-13            |
| <b>AG_F3tv</b>       | 9.992e-15  | 0.133426 | 0.0179   | 1.4988e-12             |
| <b>T2ml_STSp</b>     | 5.0371e-13 | 0.123611 | 0.017817 | 5.0371e-11             |
| <b>STSp_T1R</b>      | 7.5961e-13 | 0.123237 | 0.017888 | 5.6970750000000005e-11 |
| <b>Pole_STSp</b>     | 1.0457e-12 | 0.12179  | 0.017839 | 6.2742e-11             |
| <b>Pole_T2ml</b>     | 2.1435e-12 | 0.118543 | 0.017727 | 1.07175e-10            |
| <b>PT_T1</b>         | 4.9045e-12 | 0.118866 | 0.017877 | 2.1019285714285713e-10 |
| <b>F2p_STSp</b>      | 1.3203e-11 | 0.115631 | 0.017798 | 4.951125e-10           |
| <b>T2ml_SMG</b>      | 2.7522e-11 | 0.11216  | 0.017705 | 8.2566e-10             |
| <b>T2ml_AG</b>       | 2.6209e-11 | 0.114751 | 0.017844 | 8.2566e-10             |
| <b>AG_F2antR</b>     | 3.8704e-11 | 0.113222 | 0.017836 | 1.0555636363636364e-09 |
| <b>PrF3op_SMG</b>    | 5.1329e-11 | 0.114377 | 0.017961 | 1.283225e-09           |
| <b>F3tv_STSp</b>     | 9.2723e-11 | 0.111882 | 0.01789  | 2.1397615384615387e-09 |
| <b>RolS_PrecR</b>    | 2.2724e-10 | 0.110825 | 0.017981 | 4.869428571428571e-09  |
| <b>PrF3op_F3tv</b>   | 9.4977e-10 | 0.106623 | 0.017983 | 1.8995399999999997e-08 |
| <b>F3tv_SMG</b>      | 1.9262e-09 | 0.103729 | 0.017911 | 3.611625e-08           |
| <b>F2p_SMG</b>       | 2.8369e-09 | 0.099209 | 0.017622 | 5.0062941176470594e-08 |
| <b>STSp_F3orb</b>    | 3.7081e-09 | 0.101059 | 0.017802 | 6.180166666666667e-08  |
| <b>SMG_F2antR</b>    | 1.317e-08  | 0.096583 | 0.017754 | 2.0794736842105263e-07 |
| <b>T1_F3tv</b>       | 1.4007e-07 | 0.091235 | 0.017907 | 2.10105e-06            |
| <b>Fusa_AG</b>       | 1.794e-07  | 0.0866   | 0.01758  | 2.562857142857143e-06  |
| <b>F3opd_F3td</b>    | 1.8925e-07 | 0.089293 | 0.01785  | 2.580681818181818e-06  |
| <b>T2p_T3p</b>       | 3.8638e-07 | 0.084325 | 0.017579 | 5.0397391304347825e-06 |
| <b>Prec_F3opd</b>    | 4.8207e-07 | 0.084597 | 0.017645 | 6.025875e-06           |
| <b>T2ml_F3tv</b>     | 5.6358e-07 | 0.083375 | 0.017642 | 6.76296e-06            |
| <b>SMG_F3orb</b>     | 6.2518e-07 | 0.084135 | 0.017708 | 7.213615384615385e-06  |
| <b>Prec_SMG</b>      | 6.5433e-07 | 0.083548 | 0.017631 | 7.270333333333333e-06  |
| <b>F3tv_F3orb</b>    | 1.0351e-06 | 0.083137 | 0.017748 | 1.1090357142857142e-05 |
| <b>SMG_F3td</b>      | 1.7991e-06 | 0.081891 | 0.017835 | 1.7991e-05             |
| <b>T2ml_F3td</b>     | 1.7851e-06 | 0.080841 | 0.01772  | 1.7991e-05             |
| <b>AG_T1a</b>        | 2.5503e-06 | 0.078469 | 0.017596 | 2.4680322580645163e-05 |
| <b>F3opd_T2ml</b>    | 2.6626e-06 | 0.078433 | 0.017624 | 2.4961875e-05          |
| <b>AG_SMG</b>        | 2.877e-06  | 0.080434 | 0.017847 | 2.538529411764706e-05  |
| <b>F3tv_F2antR</b>   | 2.8001e-06 | 0.078039 | 0.017578 | 2.538529411764706e-05  |
| <b>Pole_T1a</b>      | 3.0043e-06 | 0.077865 | 0.017622 | 2.5751142857142858e-05 |
| <b>T1_PrF3op</b>     | 4.7379e-06 | 0.076509 | 0.017603 | 3.94825e-05            |
| <b>AG_STSp</b>       | 4.9848e-06 | 0.076665 | 0.017643 | 4.0417297297297304e-05 |
| <b>F3opd_STSp</b>    | 5.2766e-06 | 0.077101 | 0.017715 | 4.165736842105263e-05  |
| <b>PrF3op_T3p</b>    | 6.4761e-06 | 0.074129 | 0.017521 | 4.9816153846153846e-05 |
| <b>PrF3op_F2antR</b> | 7.0454e-06 | 0.074811 | 0.017603 | 5.2840500000000003e-05 |
| <b>T2ml_F3orb</b>    | 9.0511e-06 | 0.07515  | 0.017779 | 6.622756097560976e-05  |
| <b>T1a_STSp</b>      | 1.067e-05  | 0.072739 | 0.017536 | 7.621428571428571e-05  |
| <b>F3opdR_F2antR</b> | 1.1282e-05 | 0.073398 | 0.017628 | 7.871162790697674e-05  |
| <b>Pole_F3opd</b>    | 1.5498e-05 | 0.073106 | 0.017736 | 0.00010566818181818181 |
| <b>AG_T3p</b>        | 1.8595e-05 | 0.070762 | 0.01753  | 0.00012396666666666668 |
| <b>STSp_T2pR</b>     | 2.3762e-05 | 0.070433 | 0.017629 | 0.0001549695652173913  |
| <b>F3opd_PrF3op</b>  | 3.2513e-05 | 0.069213 | 0.017614 | 0.00020752978723404255 |

|                  |            |          |          |                         |
|------------------|------------|----------|----------|-------------------------|
| T1_T1a/HeschIR   | 3.6045e-05 | 0.06916  | 0.017661 | 0.00022528124999999998  |
| Prec_AG          | 4.1421e-05 | 0.06933  | 0.017751 | 0.00025359795918367345  |
| F3tv_T2pR        | 4.251e-05  | 0.067067 | 0.017501 | 0.0002541588235294118   |
| T1a_T1a/HeschIR  | 4.3207e-05 | 0.068425 | 0.017662 | 0.0002541588235294118   |
| PrF3op_AG        | 4.5151e-05 | 0.067181 | 0.01758  | 0.00026048653846153847  |
| T1_T1a           | 5.0854e-05 | 0.067867 | 0.01767  | 0.0002878528301886792   |
| Prec_F3tv_RolOp  | 5.5864e-05 | 0.066566 | 0.017584 | 0.00031035555555555556  |
| Pole_AG          | 5.7086e-05 | 0.065955 | 0.017525 | 0.000311378181818181818 |
| F3opd_AG         | 6.102e-05  | 0.064642 | 0.017401 | 0.00032689285714285714  |
| F3tv_F3opdR      | 6.2863e-05 | 0.065788 | 0.017518 | 0.0003308578947368421   |
| F3orb_F2antR     | 7.8212e-05 | 0.066301 | 0.017712 | 0.0003846491803278689   |
| PT_T1a/HeschIR   | 7.7413e-05 | 0.066029 | 0.017663 | 0.0003846491803278689   |
| SMG_T3p          | 7.7787e-05 | 0.066515 | 0.017725 | 0.0003846491803278689   |
| T1a_SMG          | 7.5932e-05 | 0.065428 | 0.017581 | 0.0003846491803278689   |
| Prec_T1          | 8.2673e-05 | 0.065155 | 0.017575 | 0.00040003064516129033  |
| Prec_T2p         | 8.4773e-05 | 0.064923 | 0.017579 | 0.0004036809523809524   |
| PrF3op_STSp      | 9.1453e-05 | 0.064689 | 0.017576 | 0.0004286859375         |
| T2ml_PrF3op      | 0.00013238 | 0.064308 | 0.01774  | 0.0006109846153846153   |
| Fusa_T2p         | 0.00013858 | 0.063197 | 0.017621 | 0.0006299090909090909   |
| F3opd_T3p        | 0.00017382 | 0.062951 | 0.017724 | 0.0007782985074626865   |
| T2ml_T1R         | 0.00019324 | 0.061051 | 0.017536 | 0.000852529411764706    |
| F2p_F3tv         | 0.00020405 | 0.060978 | 0.017568 | 0.0008836714285714286   |
| T2ml_F3opdR      | 0.00020619 | 0.062341 | 0.017732 | 0.0008836714285714286   |
| F3opd_F2p        | 0.0002127  | 0.059706 | 0.017397 | 0.0008987323943661971   |
| T2ml_T1a         | 0.00021766 | 0.062438 | 0.017782 | 0.00090691666666666668  |
| Pole_T1R         | 0.0002334  | 0.061741 | 0.017731 | 0.0009591780821917809   |
| SMG_T2pR         | 0.00024161 | 0.059208 | 0.017447 | 0.00097036              |
| AG_F3orb         | 0.00024259 | 0.060372 | 0.017564 | 0.00097036              |
| AG_T2p           | 0.00026321 | 0.059726 | 0.017516 | 0.0010389868421052631   |
| STSp_F3opdR      | 0.00061509 | 0.055036 | 0.017452 | 0.0023964545454545454   |
| F2p_T2ml         | 0.00069194 | 0.05667  | 0.017744 | 0.0026613076923076924   |
| T2p_RolS         | 0.00070926 | 0.05567  | 0.017608 | 0.002693392405063291    |
| T3p_F3orb        | 0.00072091 | 0.054682 | 0.017478 | 0.0027034125            |
| T1a/HeschIR_T1R  | 0.00081139 | 0.055158 | 0.017635 | 0.0030051481481481483   |
| F3tv_RolS        | 0.0010102  | 0.054803 | 0.017743 | 0.0036513253012048193   |
| F3orb_T2pR       | 0.0010072  | 0.051674 | 0.017288 | 0.0036513253012048193   |
| T2ml_T2pR        | 0.0010751  | 0.0531   | 0.017536 | 0.0038396428571428574   |
| F3tv_T1R         | 0.0011414  | 0.052596 | 0.017508 | 0.004028470588235294    |
| F3td_T3p         | 0.001177   | 0.053444 | 0.017665 | 0.004072758620689655    |
| T2p_F3opdR       | 0.0011811  | 0.050276 | 0.017205 | 0.004072758620689655    |
| F3opd_F3orb      | 0.0013438  | 0.051631 | 0.01748  | 0.004581136363636364    |
| F2p_PrF3op       | 0.0014604  | 0.051168 | 0.017478 | 0.004922696629213482    |
| F3tv_T2p         | 0.0015213  | 0.051726 | 0.017601 | 0.005015274725274725    |
| T1_RolS          | 0.0015125  | 0.051945 | 0.01762  | 0.005015274725274725    |
| Prec_F3opdR      | 0.0015897  | 0.051569 | 0.017608 | 0.005183804347826087    |
| T1_AG            | 0.001621   | 0.050772 | 0.017481 | 0.005229032258064516    |
| STSp_F3td        | 0.0017185  | 0.051715 | 0.017699 | 0.0053703125            |
| F3tv_T1a/HeschIR | 0.0016959  | 0.051083 | 0.017605 | 0.0053703125            |
| STSp_F2antR      | 0.0017051  | 0.050964 | 0.017571 | 0.0053703125            |
| F3tv_T3p         | 0.0021128  | 0.049782 | 0.017543 | 0.006534432989690722    |

|                    |           |          |          |                      |
|--------------------|-----------|----------|----------|----------------------|
| Fusa_T3p           | 0.0023718 | 0.04862  | 0.017463 | 0.007260612244897958 |
| Prec_Fusa          | 0.002608  | 0.049563 | 0.017718 | 0.007903030303030302 |
| F3opdR_T2pR        | 0.0029553 | 0.046875 | 0.017387 | 0.0088659            |
| F3tv_RoIop_F3td    | 0.0031344 | 0.047305 | 0.017509 | 0.009218823529411765 |
| F3opdR_T1R         | 0.0031071 | 0.047125 | 0.017465 | 0.009218823529411765 |
| SMG_F3opdR         | 0.0034507 | 0.046359 | 0.017414 | 0.010050582524271845 |
| F3orb_F3opdR       | 0.0038804 | 0.043742 | 0.017142 | 0.011193461538461538 |
| Fusa_STSp          | 0.0041801 | 0.046207 | 0.017613 | 0.011830471698113207 |
| T1_T1R             | 0.0041501 | 0.045576 | 0.017464 | 0.011830471698113207 |
| F3td_F2antR        | 0.0046048 | 0.043687 | 0.017254 | 0.012910654205607476 |
| PrF3op_T1R         | 0.0046951 | 0.045926 | 0.017672 | 0.013041944444444443 |
| F2antR_T2pR        | 0.0048831 | 0.045285 | 0.017595 | 0.013439724770642201 |
| T1_F3orb           | 0.0049719 | 0.044522 | 0.017494 | 0.01355972727272727  |
| Prec_RoIS          | 0.0056496 | 0.044567 | 0.01762  | 0.01526918918918919  |
| F2p_AG             | 0.0059333 | 0.044539 | 0.017677 | 0.015892767857142855 |
| T1a_F3orb          | 0.0060002 | 0.044457 | 0.017681 | 0.015929734513274337 |
| T1a_T1R            | 0.0065148 | 0.042695 | 0.017421 | 0.017144210526315793 |
| PT_T1R             | 0.0068357 | 0.042334 | 0.017404 | 0.017832260869565218 |
| T2pR_PrecR         | 0.0078292 | 0.041986 | 0.01751  | 0.020247931034482757 |
| Pole_F2p           | 0.0081415 | 0.041209 | 0.017393 | 0.020875641025641024 |
| F3opd_F2antR       | 0.0083959 | 0.041398 | 0.017466 | 0.02134550847457627  |
| Prec_F3td          | 0.0091195 | 0.041614 | 0.017623 | 0.022990336134453778 |
| SMG_T2p            | 0.0097762 | 0.040337 | 0.01747  | 0.02444405           |
| PT_AG              | 0.0099548 | 0.040569 | 0.017526 | 0.024681322314049587 |
| PrF3op_F3opdR      | 0.010361  | 0.040279 | 0.017516 | 0.025477868852459017 |
| PrF3op_F3td        | 0.011451  | 0.039057 | 0.017414 | 0.027704032258064514 |
| Fusa_T1a           | 0.011411  | 0.039653 | 0.017505 | 0.027704032258064514 |
| T2pR_T1R           | 0.013512  | 0.037623 | 0.01734  | 0.0324288            |
| T2p_F2antR         | 0.013944  | 0.0387   | 0.017595 | 0.0332               |
| T2ml_T2p           | 0.014149  | 0.036146 | 0.01709  | 0.03342283464566929  |
| T2ml_T1            | 0.014456  | 0.037889 | 0.017498 | 0.03388125           |
| F2antR_T1a/HeschIR | 0.014975  | 0.038576 | 0.017672 | 0.03482558139534884  |
| F3opd_T1R          | 0.015998  | 0.03773  | 0.017587 | 0.03691846153846153  |
| F3td_T1R           | 0.016956  | 0.03663  | 0.017451 | 0.03883053435114503  |
| F3opd_T1           | 0.017388  | 0.037128 | 0.017578 | 0.03922105263157895  |
| F3opd_T1a          | 0.017311  | 0.036128 | 0.017353 | 0.03922105263157895  |
| F2p_T2p            | 0.017929  | 0.036495 | 0.017494 | 0.04013955223880597  |
| Prec_F2antR        | 0.0185    | 0.035961 | 0.017444 | 0.04111111111111111  |
| Fusa_SMG           | 0.019285  | 0.035685 | 0.017409 | 0.042407299270072994 |
| AG_PrecR           | 0.019366  | 0.036554 | 0.01762  | 0.042407299270072994 |
| SMG_T1R            | 0.019518  | 0.035105 | 0.017327 | 0.042430434782608696 |
| F2antR_T1R         | 0.020186  | 0.035751 | 0.017503 | 0.04356690647482014  |
| F2p_T2pR           | 0.021678  | 0.035227 | 0.017513 | 0.04645285714285714  |
| T1_SMG             | 0.022995  | 0.034586 | 0.017456 | 0.04892553191489362  |
| F2p_T1             | 0.023312  | 0.034744 | 0.017515 | 0.04925070422535211  |
| STSp_SMG           | 0.025033  | 0.034228 | 0.01752  | 0.052516783216783214 |
| F2p_T1a            | 0.025393  | 0.034026 | 0.017483 | 0.052902083333333336 |
| F3tv_T1a           | 0.025701  | 0.033396 | 0.017344 | 0.053174482758620696 |
| Prec_T3p           | 0.026262  | 0.033914 | 0.017513 | 0.053963013698630144 |
| T2ml_F2antR        | 0.028099  | 0.032696 | 0.017332 | 0.057344897959183676 |

|                  |          |          |          |                     |
|------------------|----------|----------|----------|---------------------|
| Pole_F3orb       | 0.029043 | 0.032337 | 0.017317 | 0.05887094594594595 |
| F3opd_T2pR       | 0.032226 | 0.032059 | 0.017455 | 0.06488456375838926 |
| Prec_F3orb       | 0.036763 | 0.030209 | 0.01723  | 0.07347417218543047 |
| PrF3op_T2pR      | 0.036982 | 0.030994 | 0.017438 | 0.07347417218543047 |
| RolS_F3opdR      | 0.037675 | 0.030696 | 0.017406 | 0.07435855263157895 |
| PT_RolS          | 0.03822  | 0.030529 | 0.017403 | 0.07467290322580644 |
| AG_T1R           | 0.038581 | 0.030888 | 0.017498 | 0.07467290322580644 |
| T1a_RolS         | 0.038461 | 0.031088 | 0.017548 | 0.07467290322580644 |
| PrF3op_T2p       | 0.040816 | 0.030008 | 0.017388 | 0.0784923076923077  |
| Pole_PT          | 0.041623 | 0.028871 | 0.017104 | 0.0795343949044586  |
| PT_F2antR        | 0.04302  | 0.029028 | 0.017209 | 0.08168354430379747 |
| T1_PrecR         | 0.043377 | 0.02975  | 0.017435 | 0.0818433962264151  |
| Pole_PrF3op      | 0.044381 | 0.029334 | 0.017387 | 0.083214375         |
| RolS_F2antR      | 0.044847 | 0.029525 | 0.017457 | 0.08356583850931676 |
| T1_T2p           | 0.047643 | 0.029116 | 0.017487 | 0.08822777777777778 |
| Pole_T1          | 0.048333 | 0.028583 | 0.017357 | 0.08895644171779142 |
| PrF3op_PrecR     | 0.05013  | 0.028004 | 0.017274 | 0.09170121951219513 |
| F3opd_RolS       | 0.051655 | 0.027777 | 0.017282 | 0.09391818181818182 |
| Pole_F3tv        | 0.052115 | 0.028232 | 0.017443 | 0.09418373493975904 |
| T1_T2pR          | 0.054995 | 0.027845 | 0.017463 | 0.0987934131736527  |
| Pole_T2p         | 0.058384 | 0.027374 | 0.017463 | 0.10425714285714285 |
| F2p_F2antR       | 0.059932 | 0.02652  | 0.017274 | 0.10638816568047336 |
| T1_F2antR        | 0.061803 | 0.026279 | 0.017294 | 0.10897894736842105 |
| PT_T2ml          | 0.062118 | 0.027032 | 0.017531 | 0.10897894736842105 |
| F3tv_PrecR       | 0.06389  | 0.026512 | 0.017453 | 0.1101551724137931  |
| T2ml_T1a/HeschlR | 0.063623 | 0.026239 | 0.017348 | 0.1101551724137931  |
| AG_F3td          | 0.063505 | 0.026448 | 0.017406 | 0.1101551724137931  |
| T2p_T1R          | 0.068555 | 0.025693 | 0.017387 | 0.11752285714285715 |
| PT_T2pR          | 0.070362 | 0.025275 | 0.017332 | 0.11993522727272726 |
| F3opd_F3tv       | 0.072431 | 0.025427 | 0.017446 | 0.12276440677966101 |
| F2p_T1R          | 0.074494 | 0.02451  | 0.017234 | 0.12555168539325842 |
| AG_RolS          | 0.076881 | 0.024695 | 0.017383 | 0.12885083798882682 |
| STSp_T3p         | 0.079086 | 0.024867 | 0.017534 | 0.13108176795580112 |
| T2ml_T3p         | 0.079059 | 0.024715 | 0.017479 | 0.13108176795580112 |
| F2p_F3opdR       | 0.079731 | 0.024479 | 0.017426 | 0.13142472527472526 |
| T1_STSp          | 0.08256  | 0.024289 | 0.017475 | 0.13534426229508195 |
| T3p_T2pR         | 0.084009 | 0.023893 | 0.017395 | 0.13697119565217392 |
| Fusa_PrF3op      | 0.087616 | 0.023487 | 0.017379 | 0.14208             |
| STSp_T2p         | 0.088833 | 0.023142 | 0.017311 | 0.14322032085561498 |
| T1_Fusa          | 0.089274 | 0.023686 | 0.017521 | 0.14322032085561498 |
| T3p_RolS         | 0.092383 | 0.02283  | 0.017327 | 0.14551884816753927 |
| AG_T2pR          | 0.092647 | 0.022977 | 0.017401 | 0.14551884816753927 |
| Prec_PrF3op      | 0.091683 | 0.022546 | 0.017192 | 0.14551884816753927 |
| Fusa_T1a/HeschlR | 0.091747 | 0.023454 | 0.017538 | 0.14551884816753927 |
| T3p_F3opdR       | 0.093837 | 0.022158 | 0.017159 | 0.14662031250000002 |
| Prec_STSp        | 0.096469 | 0.022214 | 0.017256 | 0.14995181347150258 |
| T2ml_RolS        | 0.098784 | 0.022648 | 0.017501 | 0.15275876288659793 |
| T1a_F2antR       | 0.10306  | 0.021924 | 0.017386 | 0.15855384615384616 |
| SMG_PrecR        | 0.10434  | 0.021373 | 0.017227 | 0.15970408163265307 |
| Prec_T1a         | 0.10545  | 0.02149  | 0.017311 | 0.15977272727272726 |

|                   |         |          |          |                     |
|-------------------|---------|----------|----------|---------------------|
| PT_STSp           | 0.10512 | 0.022064 | 0.017525 | 0.15977272727272726 |
| PT_T2p            | 0.10636 | 0.021461 | 0.01733  | 0.159915            |
| T3p_T1R           | 0.10661 | 0.021009 | 0.017171 | 0.159915            |
| T1_F3opdR         | 0.11208 | 0.020925 | 0.017331 | 0.16728358208955224 |
| F3td_T2pR         | 0.1139  | 0.020993 | 0.017411 | 0.16742926829268293 |
| PT_T1a            | 0.11293 | 0.021292 | 0.017501 | 0.16742926829268293 |
| F3opdR_PrecR      | 0.11428 | 0.020773 | 0.017345 | 0.16742926829268293 |
| T1a_F3opdR        | 0.11441 | 0.020961 | 0.017415 | 0.16742926829268293 |
| Fusa_F3tv         | 0.1192  | 0.020265 | 0.017302 | 0.1711004784688995  |
| F3orb_T1R         | 0.11885 | 0.020809 | 0.017515 | 0.1711004784688995  |
| PT_F3opd          | 0.11843 | 0.020148 | 0.017232 | 0.1711004784688995  |
| PrF3op_F3orb      | 0.11795 | 0.0207   | 0.017438 | 0.1711004784688995  |
| F3orb_RoS         | 0.12439 | 0.020042 | 0.017392 | 0.17766824644549764 |
| Fusa_F2antR       | 0.12496 | 0.019988 | 0.017388 | 0.17766824644549764 |
| F3opd_F3opdR      | 0.12676 | 0.020131 | 0.017513 | 0.17853521126760563 |
| F2p_T3p           | 0.12666 | 0.019672 | 0.017313 | 0.17853521126760563 |
| Fusa_T1R          | 0.12763 | 0.019715 | 0.017365 | 0.17892056074766352 |
| F3td_F3orb        | 0.12887 | 0.019991 | 0.017526 | 0.1798186046511628  |
| RoS_T1R           | 0.13014 | 0.019467 | 0.017347 | 0.18075             |
| F3td_F3opdR       | 0.13104 | 0.019771 | 0.017521 | 0.18116129032258063 |
| F2p_F3orb         | 0.13208 | 0.019339 | 0.017359 | 0.18176146788990827 |
| Fusa_RoS          | 0.13324 | 0.019122 | 0.017315 | 0.18252054794520547 |
| F3orb_T1a/HeschIR | 0.13475 | 0.01877  | 0.017207 | 0.18375             |
| T1a_T2p           | 0.13873 | 0.018545 | 0.017234 | 0.1883212669683258  |
| T1R_PrecR         | 0.14237 | 0.0183   | 0.01725  | 0.19239189189189188 |
| Prec_T1a/HeschIR  | 0.14977 | 0.018223 | 0.017472 | 0.20148430493273542 |
| Pole_SMG          | 0.15318 | 0.017792 | 0.017395 | 0.20333628318584074 |
| SMG_T1a/HeschIR   | 0.15274 | 0.017593 | 0.017295 | 0.20333628318584074 |
| Prec_T2ml         | 0.152   | 0.017788 | 0.017344 | 0.20333628318584074 |
| Pole_T1a/HeschIR  | 0.15539 | 0.017813 | 0.017475 | 0.2053612334801762  |
| RoS_T1a/HeschIR   | 0.15729 | 0.01766  | 0.017464 | 0.2069605263157895  |
| T2p_F3orb         | 0.16806 | 0.016826 | 0.017432 | 0.2201659388646288  |
| T2p_T2pR          | 0.17132 | 0.016129 | 0.017191 | 0.22236206896551725 |
| T3p_F2antR        | 0.17166 | 0.016568 | 0.01742  | 0.22236206896551725 |
| F3opd_T2p         | 0.17196 | 0.016526 | 0.017408 | 0.22236206896551725 |
| Pole_RoS          | 0.17709 | 0.015945 | 0.017294 | 0.2280128755364807  |
| F2antR_PrecR      | 0.19887 | 0.014783 | 0.017414 | 0.25496153846153846 |
| STSp_T1a/HeschIR  | 0.2346  | 0.012696 | 0.017425 | 0.2994893617021277  |
| STSp_RoS          | 0.2373  | 0.012498 | 0.017396 | 0.3015189873417722  |
| Prec_PrecR        | 0.2382  | 0.012511 | 0.017438 | 0.3015189873417722  |
| Fusa_F3orb        | 0.2413  | 0.012364 | 0.017457 | 0.3041596638655462  |
| Pole_T2pR         | 0.25232 | 0.011454 | 0.017252 | 0.3167196652719665  |
| T3p_PrecR         | 0.27593 | 0.010279 | 0.017287 | 0.3449125           |
| Fusa_F3td         | 0.28163 | 0.010029 | 0.017322 | 0.35057676348547717 |
| T2pR_T1a/HeschIR  | 0.2861  | 0.009608 | 0.017158 | 0.35466942148760333 |
| T1a_T3p           | 0.28927 | 0.009551 | 0.017243 | 0.355672131147541   |
| Pole_PrecR        | 0.28928 | 0.009771 | 0.017436 | 0.355672131147541   |
| Pole_F3td         | 0.30359 | 0.00873  | 0.017136 | 0.3717428571428572  |
| T2p_F3td          | 0.30575 | 0.008997 | 0.017488 | 0.3728658536585366  |
| Fusa_F3opdR       | 0.30754 | 0.008559 | 0.017157 | 0.37353036437246956 |

|                    |         |          |          |                     |
|--------------------|---------|----------|----------|---------------------|
| Pole_Fusa          | 0.3287  | 0.007569 | 0.017168 | 0.3976209677419355  |
| T1_T3p             | 0.33369 | 0.007289 | 0.01711  | 0.40203614457831327 |
| Fusa_PrecR         | 0.34545 | 0.006847 | 0.017242 | 0.41453999999999996 |
| Pole_F2antR        | 0.36017 | 0.006288 | 0.0174   | 0.4304820717131474  |
| Prec_Pole          | 0.36367 | 0.005992 | 0.017216 | 0.4312292490118577  |
| PrF3op_T1a         | 0.36224 | 0.005962 | 0.017083 | 0.4312292490118577  |
| PT_SMG             | 0.36966 | 0.005787 | 0.017315 | 0.43660629921259836 |
| T2p_T1a/HeschIR    | 0.39113 | 0.004832 | 0.017353 | 0.4601529411764706  |
| PT_F3tv            | 0.42601 | 0.003137 | 0.017011 | 0.49923046875       |
| Pole_F3opdR        | 0.5     | 1,00E-06 | 0.017279 | 0.5                 |
| STSp_PrecR         | 0.5     | 1,00E-06 | 0.017026 | 0.5                 |
| T1a_PrecR          | 0.5     | 1,00E-06 | 0.017425 | 0.5                 |
| F2p_T1a/HeschIR    | 0.5     | 1,00E-06 | 0.017331 | 0.5                 |
| Fusa_T2pR          | 0.44619 | 0.002307 | 0.017122 | 0.5                 |
| F3td_PrecR         | 0.5     | 1,00E-06 | 0.017424 | 0.5                 |
| T2ml_Fusa          | 0.5     | 1,00E-06 | 0.017395 | 0.5                 |
| PT_F2p             | 0.5     | 1,00E-06 | 0.017399 | 0.5                 |
| PT_F3opdR          | 0.5     | 1,00E-06 | 0.017343 | 0.5                 |
| PT_F3orb           | 0.5     | 1,00E-06 | 0.017166 | 0.5                 |
| F3td_RolS          | 0.5     | 1,00E-06 | 0.01708  | 0.5                 |
| Prec_T2pR          | 0.4498  | 0.002227 | 0.017419 | 0.5                 |
| PrF3op_RolS        | 0.5     | 1,00E-06 | 0.017272 | 0.5                 |
| F3orb_PrecR        | 0.5     | 1,00E-06 | 0.017381 | 0.5                 |
| AG_F3opdR          | 0.5     | 1,00E-06 | 0.017246 | 0.5                 |
| T1a_T2pR           | 0.46503 | 0.001511 | 0.017201 | 0.5                 |
| F2p_PrecR          | 0.5     | 1,00E-06 | 0.017261 | 0.5                 |
| PrF3op_T1a/HeschIR | 0.5     | 1,00E-06 | 0.017359 | 0.5                 |
| F2p_RolS           | 0.5     | 1,00E-06 | 0.017335 | 0.5                 |
| F2p_Fusa           | 0.5     | 1,00E-06 | 0.017206 | 0.5                 |
| F3opdR_T1a/HeschIR | 0.43467 | 0.002787 | 0.017075 | 0.5                 |
| T1a_F3td           | 0.5     | 1,00E-06 | 0.01708  | 0.5                 |
| Prec_T1R           | 0.49947 | 2.2e-05  | 0.016903 | 0.5                 |
| T2p_PrecR          | 0.5     | 1,00E-06 | 0.017217 | 0.5                 |
| T1a/HeschIR_PrecR  | 0.5     | 1,00E-06 | 0.016987 | 0.5                 |
| T2ml_PrecR         | 0.5     | 1,00E-06 | 0.017292 | 0.5                 |
| F3opd_T1a/HeschIR  | 0.5     | 1,00E-06 | 0.017285 | 0.5                 |
| PT_Fusa            | 0.5     | 1,00E-06 | 0.01736  | 0.5                 |
| SMG_RolS           | 0.5     | 1,00E-06 | 0.0173   | 0.5                 |
| Pole_T3p           | 0.5     | 1,00E-06 | 0.017169 | 0.5                 |
| AG_T1a/HeschIR     | 0.49923 | 3.3e-05  | 0.017235 | 0.5                 |
| F3opd_PrecR        | 0.5     | 1,00E-06 | 0.017067 | 0.5                 |
| PT_T3p             | 0.5     | 1,00E-06 | 0.017343 | 0.5                 |
| PT_F3td            | 0.5     | 1,00E-06 | 0.017642 | 0.5                 |
| RolS_T2pR          | 0.5     | 1,00E-06 | 0.017092 | 0.5                 |
| PT_PrecR           | 0.5     | 1,00E-06 | 0.017182 | 0.5                 |
| T1_F3td            | 0.5     | 1,00E-06 | 0.017244 | 0.5                 |
| F2p_F3td           | 0.5     | 1,00E-06 | 0.017338 | 0.5                 |
| Prec_F2p           | 0.5     | 1,00E-06 | 0.017259 | 0.5                 |
| T3p_T1a/HeschIR    | 0.5     | 1,00E-06 | 0.017368 | 0.5                 |
| F3opd_Fusa         | 0.5     | 1,00E-06 | 0.017196 | 0.5                 |



|                  |     |          |          |     |
|------------------|-----|----------|----------|-----|
| PT_PrF3op        | 0.5 | 1,00E-06 | 0.017079 | 0.5 |
| Prec_PT          | 0.5 | 1,00E-06 | 0.017299 | 0.5 |
| F3td_T1a/HeschIR | 0.5 | 1,00E-06 | 0.017407 | 0.5 |

| CHR | SNP             | BP       | A1                    | A2 | P value                | Z-stat             | N       |
|-----|-----------------|----------|-----------------------|----|------------------------|--------------------|---------|
| 2   | rs2717046       | 58041936 | C                     | T  | 7.509071256533833e-14  | 7.478648684332633  | 31894.0 |
| 2   | rs2717066       | 58029645 | C                     | A  | 9.79095283479027e-14   | 7.443692134154676  | 32006.0 |
| 2   | rs11695135      | 57998040 | A                     | C  | 1.402962952252713e-13  | 7.396048960718104  | 31964.0 |
| 2   | 2:58029698_GA_G | 58029698 | GA                    | G  | 2.2843870492019533e-13 | 7.331001736579746  | 31575.0 |
| 2   | rs762523673     | 57944587 | TA                    | T  | 2.300842238678481e-13  | 7.330039897642196  | 30496.0 |
| 2   | rs2717079       | 58065936 | T                     | A  | 3.5951928343580125e-13 | 7.269988057019218  | 31914.0 |
| 2   | rs10204616      | 57980955 | A                     | T  | 3.762865538931088e-13  | 7.263827956399022  | 32036.0 |
| 2   | rs13025126      | 57956088 | G                     | A  | 4.756659718561889e-13  | 7.23207596792804   | 31768.0 |
| 2   | rs2125925       | 57971343 | A                     | G  | 4.972377109334335e-13  | 7.226051919294318  | 32030.0 |
| 2   | rs11679364      | 57975524 | T                     | G  | 5.601130650623536e-13  | 7.209855442848077  | 32030.0 |
| 2   | rs2947349       | 58059803 | C                     | A  | 8.159166509241092e-13  | 7.158454490341638  | 31899.0 |
| 2   | rs11125729      | 57975170 | T                     | C  | 8.252758119625963e-13  | 7.156890471883142  | 32030.0 |
| 2   | rs3886275       | 57973344 | A                     | C  | 8.316935801960934e-13  | 7.155828022329335  | 32028.0 |
| 2   | rs13002041      | 57972834 | C                     | A  | 8.382083902838332e-13  | 7.1547577063762775 | 32024.0 |
| 2   | rs7567497       | 57974429 | A                     | T  | 8.724965022511116e-13  | 7.149255738822888  | 32032.0 |
| 2   | rs2290867       | 57952870 | A                     | C  | 9.22657307832851e-13   | 7.141577646704316  | 31821.0 |
| 2   | rs12990792      | 57993568 | G                     | A  | 9.901417374212297e-13  | 7.1318702752907575 | 32058.0 |
| 2   | rs717817        | 57973452 | C                     | T  | 9.946420124661571e-13  | 7.131246228859893  | 32027.0 |
| 2   | rs70954867      | 58004577 | A                     | AT | 1.0071693047278785e-12 | 7.129523571404032  | 31910.0 |
| 2   | rs7588492       | 57995852 | A                     | G  | 1.050504443479496e-12  | 7.123722502441468  | 32040.0 |
| 2   | rs13402331      | 57947440 | T                     | C  | 1.1182120128750344e-12 | 7.1151129766265475 | 31800.0 |
| 2   | rs10186791      | 57957572 | G                     | A  | 1.2362338995419529e-12 | 7.1012612955872045 | 31848.0 |
| 2   | rs10496078      | 57993643 | G                     | A  | 1.3432180603233644e-12 | 7.089783666725836  | 31970.0 |
| 2   | 2:58008036_CT_C | 58008036 | CT                    | C  | 1.344804532198401e-12  | 7.089620303649722  | 30524.0 |
| 2   | rs6709720       | 57967563 | A                     | G  | 1.3571681570540057e-12 | 7.088353630702332  | 31972.0 |
| 2   | rs13418015      | 57948635 | A                     | G  | 1.44687051685477e-12   | 7.079488934648515  | 31798.0 |
| 2   | rs1568452       | 58012833 | C                     | T  | 1.4806833531893423e-12 | 7.076286735313048  | 32002.0 |
| 2   | rs747713243     | 57944289 | GTTGA                 | G  | 1.5320066842750308e-12 | 7.0715607847089315 | 30732.0 |
| 2   | rs1402399       | 58045395 | T                     | C  | 1.7031534764195436e-12 | 7.056853227586067  | 32019.0 |
| 2   | rs10496079      | 57997136 | G                     | C  | 1.7578655315805634e-12 | 7.0524563609521564 | 32094.0 |
| 2   | rs754784696     | 57995420 | CACTGCAAC<br>CTCTGCCT | C  | 1.8011464853968762e-12 | 7.04907222631785   | 31558.0 |
| 2   | rs6756221       | 58008155 | T                     | C  | 1.8756343501621482e-12 | 7.043430605233335  | 32065.0 |
| 2   | 2:58025739_TA_T | 58025739 | TA                    | T  | 1.98199304258768e-12   | 7.035744872113369  | 32067.0 |
| 2   | rs2717067       | 58095252 | G                     | C  | 2.1869505778929644e-12 | 7.022012440295446  | 31937.0 |
| 2   | rs2953441       | 58041482 | C                     | T  | 2.2064663280911888e-12 | 7.020771386097072  | 32012.0 |
| 2   | rs1474215       | 58032029 | C                     | G  | 2.263595032794922e-12  | 7.017199373613589  | 32115.0 |
| 2   | rs2717018       | 58035491 | C                     | T  | 2.3418209565171767e-12 | 7.012449084455942  | 32030.0 |
| 2   | rs2683629       | 58037369 | A                     | G  | 2.4374518328118458e-12 | 7.0068489382227    | 32020.0 |
| 2   | rs2953439       | 58039357 | T                     | C  | 2.441604914322157e-12  | 7.006610643753325  | 32018.0 |
| 2   | rs4671319       | 57950346 | G                     | A  | 2.450050110564384e-12  | 7.006127301054232  | 31806.0 |
| 2   | rs12997222      | 57987201 | C                     | G  | 2.550559138505833e-12  | 7.000497099624357  | 32032.0 |
| 2   | rs2717052       | 58047263 | C                     | A  | 2.6097337244071257e-12 | 6.997283236956407  | 32019.0 |
| 2   | rs2717071       | 58030962 | G                     | A  | 2.632890120618841e-12  | 6.996044995013306  | 32118.0 |
| 2   | rs7598169       | 58040729 | C                     | T  | 2.6615181469845307e-12 | 6.994528849317216  | 32007.0 |
| 2   | rs2717075       | 58032530 | G                     | C  | 2.8076048141908846e-12 | 6.987032870388254  | 32107.0 |
| 2   | rs2717048       | 58025937 | C                     | T  | 2.8488681332895767e-12 | 6.98498480513149   | 32133.0 |
| 2   | rs2683630       | 58058069 | C                     | G  | 2.8702760734587363e-12 | 6.983933675562249  | 32001.0 |
| 2   | rs2125924       | 57943567 | T                     | C  | 2.8976660739236828e-12 | 6.982599981614809  | 31789.0 |
| 2   | rs2683628       | 58036044 | A                     | G  | 2.901616570869728e-12  | 6.982408641977428  | 32034.0 |
| 2   | rs2683619       | 58032759 | C                     | T  | 3.08752837905613e-12   | 6.973681416423547  | 32077.0 |
| 2   | rs2717055       | 58044220 | G                     | A  | 3.1786612528173614e-12 | 6.969589932933111  | 32013.0 |
| 2   | rs2683621       | 58046995 | A                     | G  | 3.2977151430537547e-12 | 6.964414853888366  | 32009.0 |

|   |                 |          |    |    |                        |                    |         |
|---|-----------------|----------|----|----|------------------------|--------------------|---------|
| 2 | rs2717054       | 58046683 | G  | A  | 3.3717263583317575e-12 | 6.961289267349797  | 32015.0 |
| 2 | rs1402398       | 58042241 | G  | A  | 3.4665385475904886e-12 | 6.957382092382258  | 32015.0 |
| 2 | rs2683614       | 58026312 | G  | A  | 3.4668157932338197e-12 | 6.9573708215549805 | 32136.0 |
| 2 | rs2717053       | 58047101 | G  | C  | 3.474504213900687e-12  | 6.957058616863455  | 32011.0 |
| 2 | rs7561842       | 57995586 | C  | T  | 3.4937292174916584e-12 | 6.956280899567088  | 32052.0 |
| 2 | rs6545665       | 58023218 | G  | A  | 3.803358069783314e-12  | 6.9443021077191185 | 32137.0 |
| 2 | rs10865304      | 58002818 | G  | T  | 3.9390187567150486e-12 | 6.939352238613156  | 32129.0 |
| 2 | rs11676055      | 58017224 | C  | T  | 4.018724989299623e-12  | 6.936521363730384  | 32142.0 |
| 2 | rs2683616       | 58035555 | G  | A  | 4.173080467304795e-12  | 6.931192391601898  | 32033.0 |
| 2 | rs13026612      | 58014723 | C  | T  | 4.2019843160646536e-12 | 6.930216034061496  | 32153.0 |
| 2 | rs13026830      | 58014831 | C  | T  | 4.399808385818316e-12  | 6.923705266978315  | 32186.0 |
| 2 | rs954593        | 58027337 | C  | T  | 4.570473597500106e-12  | 6.918314931281322  | 32123.0 |
| 2 | 2:57944589_TA_T | 57944589 | TA | T  | 4.61693865900516e-12   | 6.916881530867037  | 31063.0 |
| 2 | rs4296411       | 58008872 | A  | C  | 4.6872699531209335e-12 | 6.914738561494605  | 32129.0 |
| 2 | rs2683620       | 58032553 | A  | T  | 4.75293794694769e-12   | 6.912765947786868  | 32094.0 |
| 2 | rs10166481      | 58016412 | G  | A  | 4.799590883779733e-12  | 6.911380697018104  | 32145.0 |
| 2 | rs6545664       | 58023134 | C  | T  | 4.8723988156808785e-12 | 6.9092449893533825 | 32126.0 |
| 2 | rs12713358      | 58007475 | A  | T  | 4.947716119983998e-12  | 6.90706834328845   | 32123.0 |
| 2 | rs6737913       | 58007759 | G  | A  | 5.122247456164546e-12  | 6.902146760628173  | 32129.0 |
| 2 | rs12991325      | 58016879 | C  | T  | 5.2058935066123285e-12 | 6.899846023034012  | 32129.0 |
| 2 | rs11898858      | 58006624 | G  | A  | 5.2430655488259674e-12 | 6.898835189190768  | 32129.0 |
| 2 | rs6545663       | 58023009 | A  | T  | 5.4461797015394634e-12 | 6.893432945788772  | 32134.0 |
| 2 | rs1568450       | 58011697 | A  | G  | 5.4533759225226845e-12 | 6.893245189793202  | 32140.0 |
| 2 | rs6761347       | 58010040 | T  | A  | 5.513784004873107e-12  | 6.8916785957517455 | 32136.0 |
| 2 | rs2683615       | 58027493 | C  | A  | 5.77640683131602e-12   | 6.885057819863727  | 32134.0 |
| 2 | rs1589407       | 58019903 | T  | C  | 6.114830298944072e-12  | 6.876948267629175  | 32133.0 |
| 2 | rs6730037       | 58005792 | G  | A  | 6.382510026711893e-12  | 6.870839661209673  | 32127.0 |
| 2 | rs10195687      | 57956533 | T  | G  | 6.637012260509859e-12  | 6.865260294841688  | 30956.0 |
| 2 | rs2090793       | 58021528 | G  | A  | 6.831652151435925e-12  | 6.861132997671249  | 32131.0 |
| 2 | 2:57958740_AT_A | 57958740 | AT | A  | 7.2726263925100866e-12 | 6.852193157094956  | 30959.0 |
| 2 | rs4672223       | 58021882 | C  | A  | 7.382042436312638e-12  | 6.850057279921237  | 32135.0 |
| 2 | rs13016665      | 57995348 | C  | A  | 7.585676138068826e-12  | 6.846163532231407  | 31377.0 |
| 2 | rs13032423      | 57992112 | G  | A  | 7.590666038505336e-12  | 6.8460694097598696 | 32026.0 |
| 2 | rs2717076       | 58061127 | C  | T  | 8.978237879762524e-12  | 6.8219988607527675 | 31983.0 |
| 2 | rs34035400      | 57979248 | T  | TC | 1.0663460561044457e-11 | 6.797250487503264  | 31344.0 |
| 2 | rs4671320       | 57955644 | C  | G  | 1.0827401565139252e-11 | 6.795051271028208  | 30905.0 |
| 2 | rs6720888       | 57945522 | A  | G  | 1.1898896428705287e-11 | 6.781433842511929  | 31719.0 |
| 2 | rs10496076      | 57942987 | T  | C  | 1.2500983103621435e-11 | 6.774300234350301  | 31700.0 |
| 2 | 2:58006919_GA_G | 58006919 | GA | G  | 1.6801244888995532e-11 | 6.731422385463492  | 31353.0 |
| 2 | rs10196378      | 57951208 | T  | G  | 1.7949525851836266e-11 | 6.7217983441656735 | 31734.0 |
| 2 | rs2678870       | 58153375 | T  | A  | 2.205387733850836e-11  | 6.691735800270817  | 31457.0 |
| 2 | rs1460255       | 57978858 | T  | C  | 2.443785238474017e-11  | 6.676702377103402  | 32004.0 |
| 2 | rs2678869       | 58153374 | A  | C  | 2.536859778891077e-11  | 6.67121977566787   | 31449.0 |
| 2 | rs2678900       | 58177683 | T  | G  | 3.3523663684299326e-11 | 6.6301981081747074 | 31911.0 |
| 2 | rs200493119     | 58154132 | C  | CG | 3.550819683793183e-11  | 6.621703825229244  | 31990.0 |
| 2 | rs540927767     | 58154133 | T  | TG | 3.550819683793183e-11  | 6.621703825229244  | 31990.0 |
| 2 | rs2139054       | 58156583 | A  | C  | 3.7083772274730795e-11 | 6.615284549858058  | 32146.0 |
| 2 | rs2678871       | 58153602 | G  | A  | 3.722021311095729e-11  | 6.614741275750567  | 31315.0 |
| 2 | rs2717002       | 58142647 | T  | G  | 3.8680837122187476e-11 | 6.609044528366264  | 32151.0 |
| 2 | rs2683618       | 58033361 | A  | G  | 4.195036041680869e-11  | 6.5970202077931965 | 32001.0 |
| 2 | rs2717068       | 58094873 | A  | C  | 4.204053324410885e-11  | 6.596701733804897  | 32186.0 |
| 2 | rs908731        | 58135010 | C  | G  | 4.568074311588503e-11  | 6.58437351047073   | 32134.0 |
| 2 | rs2312141       | 58155358 | A  | T  | 4.671864965451051e-11  | 6.58103439066585   | 32146.0 |
| 2 | rs908730        | 58135011 | G  | A  | 4.771220096525593e-11  | 6.577905275304311  | 31892.0 |

|   |                    |          |       |           |                        |                    |         |
|---|--------------------|----------|-------|-----------|------------------------|--------------------|---------|
| 2 | rs2717004          | 58143854 | C     | A         | 4.954565724890802e-11  | 6.572294757013515  | 32130.0 |
| 2 | rs2717015          | 58155253 | T     | C         | 5.062431743716292e-11  | 6.569088128209432  | 32147.0 |
| 2 | rs2717003          | 58143438 | A     | G         | 5.202366244763265e-11  | 6.565026348535002  | 32122.0 |
| 2 | rs7557715          | 57973818 | C     | T         | 5.4037119689802747e-11 | 6.559365741753241  | 32002.0 |
| 2 | rs2678873          | 58154601 | G     | A         | 5.4757340303383944e-11 | 6.5573909082168536 | 32144.0 |
| 2 | rs2465804          | 58148180 | G     | A         | 5.5002343775255674e-11 | 6.556724900470686  | 32151.0 |
| 2 | rs2678880          | 58158283 | C     | T         | 5.6194189905930995e-11 | 6.553525877227467  | 32155.0 |
| 2 | rs2678881          | 58140977 | G     | A         | 5.983692333840129e-11  | 6.544144492310271  | 32162.0 |
| 2 | rs2717007          | 58149116 | G     | A         | 6.225621735678367e-11  | 6.538217804341795  | 32152.0 |
| 2 | rs2678893          | 58167143 | A     | G         | 6.498793297339463e-11  | 6.531790701488059  | 31518.0 |
| 2 | rs2678915          | 58119574 | C     | T         | 6.677197742802412e-11  | 6.527734368726225  | 32084.0 |
| 2 | rs2678905          | 58135872 | A     | G         | 6.730540209240214e-11  | 6.52654210664636   | 32127.0 |
| 2 | rs1040224          | 58139865 | G     | C         | 7.00071125732075e-11   | 6.520641962172031  | 32148.0 |
| 2 | rs2678901          | 58138651 | A     | G         | 7.006641984620112e-11  | 6.520514956828962  | 32144.0 |
| 2 | rs2678886          | 58161221 | A     | G         | 7.212038918647845e-11  | 6.516180074849907  | 32157.0 |
| 2 | rs1040225          | 58139593 | A     | G         | 7.248312883468831e-11  | 6.515427080276327  | 32144.0 |
| 2 | rs11410659         | 58145483 | A     | AT        | 7.255176124644291e-11  | 6.515285024095081  | 32127.0 |
| 2 | rs2717010          | 58151817 | A     | G         | 7.264672457106099e-11  | 6.515088684442151  | 32145.0 |
| 2 | rs2678904          | 58137755 | G     | T         | 7.495260467269011e-11  | 6.510396686020832  | 32186.0 |
| 2 | rs2678903          | 58137930 | A     | G         | 7.62883407826805e-11   | 6.507742891087599  | 32156.0 |
| 2 | rs2717024          | 58161397 | C     | G         | 7.858665339407565e-11  | 6.503281278830475  | 32159.0 |
| 2 | rs2678890          | 58164435 | C     | T         | 7.904095685540438e-11  | 6.50241448175816   | 32186.0 |
| 2 | 2:57971694_GAAAA_G | 57971694 | GAAAA | G         | 7.938673861258053e-11  | 6.5017579997209465 | 27885.0 |
| 2 | rs2717011          | 58152075 | T     | C         | 8.177266487209052e-11  | 6.4973029991758775 | 32118.0 |
| 2 | rs2459982          | 58150941 | A     | C         | 8.241143924385449e-11  | 6.49613184725004   | 32151.0 |
| 2 | rs2717014          | 58154249 | T     | C         | 8.288372022848787e-11  | 6.495271643788983  | 32157.0 |
| 2 | rs2717023          | 58161355 | C     | T         | 8.433023290534931e-11  | 6.492666503191044  | 32160.0 |
| 2 | rs2717001          | 58137618 | C     | T         | 8.982133723183451e-11  | 6.483159693547808  | 32142.0 |
| 2 | rs2678892          | 58167140 | G     | A         | 9.015062741680626e-11  | 6.4826077999802765 | 31772.0 |
| 2 | rs2717022          | 58160639 | G     | C         | 9.23177405796327e-11   | 6.479024130374065  | 32155.0 |
| 2 | rs10694743         | 58149555 | G     | GCTA<br>A | 9.313760211575412e-11  | 6.477689763362997  | 31917.0 |
| 2 | rs2678887          | 58161752 | C     | A         | 9.377967288290532e-11  | 6.476652754281639  | 32164.0 |
| 2 | rs2678888          | 58162191 | A     | G         | 9.540620104491484e-11  | 6.474056497863742  | 32161.0 |
| 2 | rs2678879          | 58158152 | A     | G         | 9.623318398756093e-11  | 6.472753019968161  | 32148.0 |
| 2 | rs2678883          | 58159670 | A     | G         | 9.727648543454776e-11  | 6.471124118938718  | 32165.0 |
| 2 | rs2717019          | 58159473 | T     | G         | 9.989130451977444e-11  | 6.467115492663632  | 32164.0 |
| 2 | rs2717033          | 58166769 | T     | C         | 1.003161196388558e-10  | 6.466473937085437  | 32092.0 |
| 2 | 2:57971686_AAAAG_A | 57971686 | AAAAG | A         | 1.0730299105885727e-10 | 6.456287051652602  | 28278.0 |
| 2 | rs10192098         | 57971698 | A     | G         | 1.137357566425249e-10  | 6.447465891876822  | 28628.0 |
| 2 | 2:57944288_AGTTG_A | 57944288 | AGTTG | A         | 1.1380448180828348e-10 | 6.447374308120757  | 28211.0 |
| 2 | rs1568253          | 58170004 | T     | C         | 1.2171348690034406e-10 | 6.437180098060972  | 32094.0 |
| 2 | rs112345168        | 58007905 | T     | A         | 1.2360602349898663e-10 | 6.434836852733957  | 32035.0 |
| 2 | rs59098844         | 58044533 | G     | C         | 1.2549593764805905e-10 | 6.432531590796591  | 31989.0 |
| 2 | rs1568254          | 58170161 | C     | A         | 1.308890180370703e-10  | 6.426135177831644  | 32060.0 |
| 2 | rs2678906          | 58134048 | T     | A         | 1.321051669433591e-10  | 6.424728405042805  | 32117.0 |
| 2 | rs2678889          | 58164223 | A     | G         | 1.3370833475592232e-10 | 6.422893167492071  | 32172.0 |
| 2 | rs2176546          | 58156772 | G     | C         | 1.4422191637712941e-10 | 6.411365551206032  | 31391.0 |
| 2 | rs2683634          | 58113995 | T     | C         | 1.518528093372511e-10  | 6.403502056206875  | 32092.0 |
| 2 | rs2678891          | 58166643 | T     | G         | 1.5421120136638274e-10 | 6.40114977658657   | 32170.0 |
| 2 | rs2678882          | 58159362 | T     | A         | 1.571753160248631e-10  | 6.398242706218817  | 32165.0 |
| 2 | rs970941           | 58166181 | G     | A         | 1.591276109496912e-10  | 6.396357102210738  | 32172.0 |
| 2 | rs2717036          | 58168098 | T     | C         | 1.7041806053127746e-10 | 6.385876893364757  | 32101.0 |
| 2 | rs11433420         | 58037203 | T     | TA        | 1.7240782506601732e-10 | 6.384100514460116  | 31750.0 |
| 2 | 2:58165967_TTC_T   | 58165967 | TTC   | T         | 1.754988159125896e-10  | 6.381380349092268  | 32153.0 |

|   |             |           |    |    |                        |                    |         |
|---|-------------|-----------|----|----|------------------------|--------------------|---------|
| 2 | rs2717031   | 58166468  | T  | C  | 1.8627206460450842e-10 | 6.372252343143579  | 32165.0 |
| 2 | rs1518394   | 58171287  | A  | G  | 1.8703166620754984e-10 | 6.371628355310698  | 32082.0 |
| 2 | rs2678908   | 58130327  | C  | T  | 1.948951585226858e-10  | 6.365310424609946  | 32115.0 |
| 2 | rs2717034   | 58167258  | T  | G  | 2.1658607047346155e-10 | 6.34909442448742   | 31924.0 |
| 2 | rs2717032   | 58166760  | T  | C  | 2.1893019018983542e-10 | 6.347437980949673  | 32103.0 |
| 2 | rs66490669  | 58040174  | T  | C  | 2.3238840117095002e-10 | 6.338250752756887  | 31988.0 |
| 2 | rs2717056   | 58128804  | C  | T  | 2.4546089963083733e-10 | 6.3298114878031955 | 32093.0 |
| 2 | rs2678894   | 58167260  | G  | C  | 3.1863273414313694e-10 | 6.289430492216134  | 31892.0 |
| 2 | rs1356544   | 58123724  | T  | C  | 3.436154865625484e-10  | 6.2777011868663175 | 32043.0 |
| 2 | rs2717020   | 58159852  | T  | C  | 3.6114780196782717e-10 | 6.2699570098353075 | 32039.0 |
| 2 | rs1356545   | 58123798  | T  | C  | 3.6815460684928515e-10 | 6.266964260737129  | 32042.0 |
| 2 | rs34738965  | 58160798  | G  | GT | 3.6938255039266993e-10 | 6.266445513735445  | 31829.0 |
| 2 | rs2717029   | 58165595  | G  | T  | 3.920585364773792e-10  | 6.257157057943985  | 32045.0 |
| 2 | rs1518393   | 58171220  | A  | C  | 4.293770582666652e-10  | 6.24295624044365   | 30817.0 |
| 2 | rs2717040   | 58169494  | T  | C  | 4.612037532345532e-10  | 6.231766777994716  | 32095.0 |
| 2 | rs2717030   | 58165694  | T  | C  | 4.780809461575725e-10  | 6.226135397721006  | 32048.0 |
| 2 | rs2678896   | 58169388  | A  | G  | 4.841172465276129e-10  | 6.224168281848755  | 32080.0 |
| 2 | rs2717039   | 58169166  | G  | T  | 5.083219249677849e-10  | 6.21651372950103   | 31989.0 |
| 2 | rs2678885   | 58160138  | T  | G  | 5.304242646916319e-10  | 6.20982859118433   | 32035.0 |
| 2 | rs2717021   | 58160605  | G  | A  | 5.838425690807059e-10  | 6.1947320767967975 | 32039.0 |
| 2 | rs2717041   | 58172107  | C  | T  | 5.862092206935854e-10  | 6.194094843803301  | 32045.0 |
| 2 | rs2717035   | 58167440  | C  | T  | 6.0612276042444e-10    | 6.188830340474175  | 32120.0 |
| 2 | rs2717025   | 58163146  | G  | T  | 6.232256912549632e-10  | 6.184441879343302  | 32029.0 |
| 2 | rs2953440   | 58039936  | C  | T  | 6.278383726728433e-10  | 6.183278422119954  | 31140.0 |
| 2 | rs2678874   | 58154915  | T  | A  | 6.280396846155336e-10  | 6.183227835313652  | 32037.0 |
| 2 | rs1401100   | 58168856  | G  | T  | 6.347140145895304e-10  | 6.181559567319177  | 32093.0 |
| 2 | rs68119977  | 58078939  | T  | G  | 6.428125546194884e-10  | 6.1795581471700025 | 31947.0 |
| 2 | rs2717026   | 58163178  | A  | G  | 6.534427397782493e-10  | 6.176968089051997  | 32031.0 |
| 2 | rs2312143   | 58155829  | G  | A  | 7.412868960084963e-10  | 6.157015300853003  | 32040.0 |
| 2 | rs13011472  | 57961602  | C  | G  | 7.509231289987038e-10  | 6.154968724815363  | 31828.0 |
| 2 | rs2717005   | 58145060  | A  | G  | 7.802993256855536e-10  | 6.1488841739851186 | 32050.0 |
| 2 | rs62158166  | 114077218 | G  | C  | 8.696490048426408e-10  | 6.13166349248832   | 31803.0 |
| 2 | rs2678895   | 58139906  | A  | T  | 8.841255681399849e-10  | 6.12903701618565   | 32087.0 |
| 2 | rs2717038   | 58168831  | A  | G  | 9.725575113458217e-10  | 6.11384996027404   | 31996.0 |
| 2 | rs2717000   | 58136220  | C  | G  | 9.726655354912617e-10  | 6.113832245361495  | 32110.0 |
| 2 | rs867740    | 58135023  | T  | C  | 9.987139503655902e-10  | 6.1096155988314065 | 32116.0 |
| 2 | rs12616641  | 114079248 | C  | A  | 1.0352198148425894e-09 | 6.103883150596727  | 31792.0 |
| 2 | rs2717012   | 58152280  | C  | A  | 1.0523498503794608e-09 | 6.101260878601733  | 32028.0 |
| 2 | rs2683632   | 58116640  | T  | C  | 1.0546480668889708e-09 | 6.100912237651203  | 32186.0 |
| 2 | rs765106764 | 58130295  | TA | T  | 1.0712386840286953e-09 | 6.0984171889841035 | 32057.0 |
| 2 | rs951965    | 58144542  | C  | A  | 1.086093372448454e-09  | 6.09621497012119   | 32057.0 |
| 2 | rs2678907   | 58133522  | A  | G  | 1.1326451901864956e-09 | 6.089499075599543  | 32077.0 |
| 2 | rs2717063   | 58110969  | C  | A  | 1.1353003012507847e-09 | 6.089124188412862  | 31314.0 |
| 2 | rs2678902   | 58138581  | G  | A  | 1.1584979761741794e-09 | 6.08588469498637   | 32096.0 |
| 2 | rs6720288   | 58111064  | A  | G  | 1.170811156021617e-09  | 6.084190794909186  | 32107.0 |
| 2 | rs62158168  | 114078381 | C  | G  | 1.2639686162508764e-09 | 6.071911153655794  | 31798.0 |
| 2 | rs11682175  | 57987593  | T  | C  | 1.2785519848169445e-09 | 6.070069133558503  | 31916.0 |
| 2 | rs34967704  | 58150658  | G  | GT | 1.301437898222938e-09  | 6.067219312147462  | 29452.0 |
| 2 | rs2678916   | 58119582  | G  | T  | 1.3377408163134379e-09 | 6.0627974634729505 | 32152.0 |
| 2 | rs2717013   | 58152537  | G  | A  | 1.3676377612098019e-09 | 6.059242852320146  | 32033.0 |
| 2 | rs1533725   | 58111922  | T  | G  | 1.4855149773372213e-09 | 6.045929011950247  | 32110.0 |
| 2 | rs2717059   | 58119657  | C  | G  | 1.5171172228633376e-09 | 6.042534683447893  | 32162.0 |
| 2 | rs2717060   | 58119122  | A  | G  | 1.53821636617549e-09   | 6.04030662097888   | 32162.0 |
| 2 | rs2717057   | 58127907  | C  | T  | 1.5520242839244666e-09 | 6.0388645767326485 | 32132.0 |

|   |                  |           |       |     |                        |                    |         |
|---|------------------|-----------|-------|-----|------------------------|--------------------|---------|
| 2 | rs35185782       | 58169712  | T     | TG  | 1.5611519081542134e-09 | 6.037918172190772  | 31929.0 |
| 2 | rs2678911        | 58115072  | G     | C   | 1.5899735751718672e-09 | 6.034964784362972  | 32143.0 |
| 2 | rs2678917        | 58120553  | T     | A   | 1.6042147323951215e-09 | 6.033524683179313  | 32161.0 |
| 2 | rs62158169       | 114081827 | C     | T   | 1.7560111217112142e-09 | 6.018904790252428  | 31833.0 |
| 2 | 2:58167698_GA_G  | 58167698  | GA    | G   | 1.8173082916987509e-09 | 6.013347553692409  | 31935.0 |
| 2 | rs2678913        | 58117095  | T     | C   | 1.9067708757113082e-09 | 6.0055562114454135 | 32173.0 |
| 2 | rs2030237        | 58196110  | A     | G   | 1.950133348638669e-09  | 6.001907050700856  | 31821.0 |
| 2 | rs11387884       | 58126250  | C     | CT  | 1.994684086599985e-09  | 5.998239317832078  | 32149.0 |
| 2 | rs2678897        | 58169418  | G     | A   | 1.9993313462616354e-09 | 5.997861329942781  | 31730.0 |
| 2 | rs2465805        | 58148349  | C     | T   | 2.0272168303128795e-09 | 5.995611067330472  | 32045.0 |
| 2 | rs2678898        | 58171964  | T     | C   | 2.044298798455136e-09  | 5.994247458611572  | 31843.0 |
| 2 | rs62158170       | 114082175 | A     | G   | 2.145329402490224e-09  | 5.986402614078817  | 31848.0 |
| 2 | rs2717008        | 58149158  | T     | C   | 2.146458700537828e-09  | 5.9863169761032085 | 32045.0 |
| 2 | rs2678918        | 58121391  | C     | T   | 2.1469921833258327e-09 | 5.986276535805888  | 32142.0 |
| 2 | rs781157235      | 58115023  | GCTAT | G   | 2.330216518509272e-09  | 5.972935776432117  | 32014.0 |
| 2 | rs7606466        | 57942325  | C     | G   | 2.413965327697891e-09  | 5.9671749548492565 | 31695.0 |
| 2 | rs2678914        | 58117926  | C     | G   | 2.647671675789205e-09  | 5.9520730330130815 | 32160.0 |
| 2 | rs2678909        | 58150768  | T     | C   | 2.703116108355669e-09  | 5.948681153815977  | 32099.0 |
| 2 | rs11688767       | 57988194  | A     | T   | 2.82050659497444e-09   | 5.9417178055990245 | 32019.0 |
| 2 | rs2139053        | 58156539  | T     | C   | 2.838538928832563e-09  | 5.940673248909506  | 32117.0 |
| 2 | rs62141276       | 48214217  | G     | A   | 3.260361758521317e-09  | 5.9179211596293415 | 31243.0 |
| 2 | 2:58114255_CAT_C | 58114255  | CAT   | C   | 3.4487512714418724e-09 | 5.908672705049372  | 31713.0 |
| 2 | rs7573056        | 58229428  | A     | C   | 3.4534302677763477e-09 | 5.908449316872248  | 31775.0 |
| 2 | rs7600005        | 48212055  | G     | A   | 3.4616021564957447e-09 | 5.908059874141163  | 31250.0 |
| 2 | rs19993536       | 114082628 | T     | TA  | 3.6096074540096334e-09 | 5.901157210496769  | 31456.0 |
| 2 | rs6717480        | 58210522  | C     | A   | 3.786755864022748e-09  | 5.8932487985970345 | 31813.0 |
| 2 | rs10172295       | 58201202  | G     | A   | 3.850876669734966e-09  | 5.890474768318746  | 31758.0 |
| 2 | 2:58225035_GA_G  | 58225035  | GA    | G   | 4.229429511596792e-09  | 5.874960982998737  | 32045.0 |
| 2 | rs2459981        | 58127925  | C     | A   | 4.2365243948535626e-09 | 5.874683316100464  | 32095.0 |
| 2 | rs4672228        | 58237405  | T     | C   | 4.644581577154848e-09  | 5.8594301628841015 | 31713.0 |
| 2 | rs2678910        | 58112266  | A     | T   | 4.767318338502343e-09  | 5.85509694880216   | 32070.0 |
| 2 | 2:58047881_CAA_C | 58047881  | CAA   | C   | 5.51218864711555e-09   | 5.83092218691396   | 30062.0 |
| 2 | rs4672226        | 58203057  | C     | T   | 5.6737748794352885e-09 | 5.8260996397533376 | 31725.0 |
| 2 | rs6722461        | 57970943  | A     | G   | 5.854459831672264e-09  | 5.820862844514839  | 31913.0 |
| 2 | rs2678884        | 58160123  | A     | C   | 6.359046829817534e-09  | 5.807030731331679  | 32133.0 |
| 2 | rs2717027        | 58164454  | G     | A   | 6.4087698251746e-09    | 5.805725989050696  | 32141.0 |
| 2 | rs2678922        | 58127647  | A     | G   | 6.448323535337515e-09  | 5.804695103377244  | 31764.0 |
| 2 | rs2678923        | 58127648  | A     | C   | 6.448323535337515e-09  | 5.804695103377244  | 31764.0 |
| 2 | rs2043890        | 58350571  | G     | A   | 6.577663541719292e-09  | 5.801366547769947  | 31914.0 |
| 2 | rs62158161       | 114065572 | C     | T   | 8.105166786222006e-09  | 5.7662565111120125 | 31596.0 |
| 2 | rs6737318        | 114083120 | A     | G   | 8.266233075762942e-09  | 5.762937667077415  | 31861.0 |
| 2 | rs17396357       | 48252311  | C     | T   | 8.635586990735586e-09  | 5.755583821790846  | 31972.0 |
| 2 | rs375442013      | 58364359  | C     | CAT | 8.685063602642473e-09  | 5.754593285245908  | 31215.0 |
| 2 | rs2717042        | 58177082  | C     | A   | 1.0210498276436132e-08 | 5.727194664998169  | 32055.0 |
| 2 | rs7556815        | 114085785 | G     | A   | 1.2556660014912192e-08 | 5.691990828868012  | 31884.0 |
| 2 | rs12615370       | 114068017 | T     | G   | 1.3019778500892385e-08 | 5.685805138745737  | 31853.0 |
| 2 | rs62158163       | 114071717 | T     | C   | 1.4009022444895443e-08 | 5.673278472417987  | 31909.0 |
| 2 | rs62158206       | 114084596 | T     | C   | 1.4023388158134007e-08 | 5.673102966709871  | 31879.0 |
| 2 | rs11891807       | 48288816  | T     | G   | 1.4205839848827815e-08 | 5.670889026404753  | 32070.0 |
| 2 | rs986512         | 58275666  | G     | A   | 1.4279965185570747e-08 | 5.669997441742872  | 31777.0 |
| 2 | rs56163359       | 114071473 | T     | C   | 1.4560674025713104e-08 | 5.666661323095875  | 31907.0 |
| 2 | rs6545677        | 58211509  | A     | G   | 1.4686161699637607e-08 | 5.665190109903842  | 32051.0 |
| 2 | rs56093896       | 114103966 | C     | A   | 1.535550798847022e-08  | 5.657543304931606  | 32082.0 |
| 2 | 2:58002123_CA_C  | 58002123  | CA    | C   | 1.5875374188645882e-08 | 5.651824387789941  | 24995.0 |

|   |                      |           |         |           |                        |                    |         |
|---|----------------------|-----------|---------|-----------|------------------------|--------------------|---------|
| 2 | rs6712131            | 48256981  | G       | C         | 1.6663787615773528e-08 | 5.643489311788851  | 32109.0 |
| 2 | rs966721             | 58197305  | T       | A         | 1.7083062502817758e-08 | 5.639211481577844  | 31335.0 |
| 2 | rs2678899            | 58176213  | A       | G         | 1.9200464167785536e-08 | 5.619055081979496  | 31990.0 |
| 2 | rs1807282            | 114110036 | A       | T         | 2.0499543768891307e-08 | 5.607731736120582  | 32027.0 |
| 2 | rs2863957            | 114089551 | C       | A         | 2.0674322918976568e-08 | 5.6062617511243795 | 32108.0 |
| 2 | rs62158211           | 114106139 | G       | T         | 2.072762263554e-08     | 5.605815872338141  | 32076.0 |
| 2 | rs1964463            | 114069021 | A       | G         | 2.102975056585652e-08  | 5.603309268224422  | 31760.0 |
| 2 | rs62158213           | 114110568 | G       | A         | 2.1822585877712768e-08 | 5.596894142901268  | 31982.0 |
| 2 | rs10188070           | 58299326  | A       | G         | 2.1986066378411718e-08 | 5.595599536817773  | 31849.0 |
| 2 | rs60758951           | 48285113  | T       | C         | 2.2509981461125985e-08 | 5.591512708884102  | 32081.0 |
| 2 | rs113257513          | 58283746  | A       | ACT       | 2.2656522335425278e-08 | 5.5903861294254025 | 31271.0 |
| 2 | rs2717006            | 58146956  | T       | A         | 2.3555198766426994e-08 | 5.5836282062748674 | 31174.0 |
| 2 | rs4618068            | 114109355 | C       | T         | 2.5349194254202704e-08 | 5.57085520189422   | 32036.0 |
| 2 | rs848294             | 58381785  | T       | C         | 2.5663554533216797e-08 | 5.5687077279453865 | 31906.0 |
| 2 | rs7601767            | 48277490  | G       | A         | 2.56914485633948e-08   | 5.568518411637247  | 32041.0 |
| 2 | rs762952217          | 58284638  | CTCTT   | C         | 2.619078709026455e-08  | 5.565162737409644  | 31543.0 |
| 2 | rs2312147            | 58222928  | T       | C         | 2.668416939665912e-08  | 5.561907522799853  | 32186.0 |
| 2 | rs6727241            | 48257032  | T       | C         | 2.8070161024372345e-08 | 5.553066261065291  | 32103.0 |
| 2 | rs56030357           | 48270092  | T       | C         | 2.821351458741609e-08  | 5.552176106725428  | 32078.0 |
| 2 | 2:114073498_GGAA_G   | 114073498 | GGAA    | G         | 2.8406660479239024e-08 | 5.550983681510545  | 31461.0 |
| 2 | rs968653             | 58296890  | A       | G         | 2.90614720191729e-08   | 5.5469988094951335 | 31838.0 |
| 2 | rs1823125            | 114090412 | A       | G         | 2.952169680898016e-08  | 5.5442498955059145 | 32186.0 |
| 2 | rs62158160           | 114065390 | C       | T         | 3.039524367751013e-08  | 5.53914469618479   | 32186.0 |
| 2 | rs12620940           | 58311684  | T       | C         | 3.0423191153335044e-08 | 5.538983725251036  | 32186.0 |
| 2 | rs10172212           | 58379496  | A       | C         | 3.0698070522181826e-08 | 5.5374080849489165 | 31918.0 |
| 2 | rs75534727           | 58433639  | G       | GA        | 3.1625279565639913e-08 | 5.532192361892594  | 32008.0 |
| 2 | rs2717043            | 58179019  | C       | T         | 3.224668192509657e-08  | 5.528779242831654  | 31992.0 |
| 2 | 2:58300783_ATATATT_A | 58300783  | ATATATT | A         | 3.274511813306779e-08  | 5.52608733122048   | 31753.0 |
| 2 | rs3771224            | 58460029  | C       | T         | 3.498155417567774e-08  | 5.514478562280622  | 32005.0 |
| 2 | rs111789636          | 114065433 | A       | AC        | 3.601482088335681e-08  | 5.5093563267206775 | 31682.0 |
| 2 | rs72816437           | 48274592  | A       | T         | 3.762596894116509e-08  | 5.501647010267156  | 32083.0 |
| 2 | rs7563432            | 48281138  | G       | A         | 3.9308476891759804e-08 | 5.493930710268429  | 31948.0 |
| 2 | rs2118899            | 58322226  | A       | C         | 4.0937073974179195e-08 | 5.486760853121716  | 32072.0 |
| 2 | rs62135450           | 48274591  | G       | T         | 4.127857499780008e-08  | 5.485292534398298  | 32082.0 |
| 2 | 2:114068802_CTG_C    | 114068802 | CTG     | C         | 4.129171577574041e-08  | 5.485236269898231  | 31521.0 |
| 2 | rs11686281           | 58478157  | G       | A         | 4.167054967596864e-08  | 5.483621648160112  | 31735.0 |
| 2 | rs848286             | 58394543  | T       | C         | 4.190861254198733e-08  | 5.482614270732932  | 31944.0 |
| 2 | rs760021402          | 57947592  | A       | AG        | 4.2054532479580835e-08 | 5.4819995408598805 | 30285.0 |
| 2 | rs10205421           | 58297664  | G       | A         | 4.223263003054405e-08  | 5.481252049880153  | 31825.0 |
| 2 | 2:58295946_GAA_G     | 58295946  | GAA     | G         | 4.394208145194627e-08  | 5.474228884612881  | 30963.0 |
| 2 | rs1100190            | 58399905  | G       | C         | 4.4103159897692726e-08 | 5.473580820945632  | 31956.0 |
| 2 | 2:58141384_CT_C      | 58141384  | CT      | C         | 4.67827261922551e-08   | 5.463124115639486  | 30136.0 |
| 2 | rs12477242           | 58452792  | C       | G         | 4.776684140154312e-08  | 5.45942895954222   | 32088.0 |
| 2 | rs10641725           | 58385305  | T       | TCTT<br>A | 4.970693734381633e-08  | 5.452355579274296  | 31724.0 |
| 3 | rs35124509           | 89521693  | T       | C         | 8.951490491166745e-59  | 16.164670730505776 | 32186.0 |
| 3 | rs67316928           | 89482234  | T       | C         | 2.2235205955887675e-58 | 16.108500103666593 | 31898.0 |
| 3 | rs12636275           | 89523038  | C       | A         | 1.7184515800019518e-57 | 15.981540806482005 | 32183.0 |
| 3 | rs7637670            | 89493167  | G       | A         | 4.092314447437357e-56  | 15.782710354814027 | 31881.0 |
| 3 | rs987748             | 89494030  | C       | A         | 4.443269278981398e-56  | 15.777516905629911 | 31871.0 |
| 3 | rs11921985           | 89467357  | A       | G         | 5.58817602232919e-56   | 15.763037034636396 | 31882.0 |
| 3 | rs35968370           | 89466339  | A       | T         | 7.583394688902125e-56  | 15.743733733295667 | 31913.0 |
| 3 | rs3792572            | 89456555  | T       | A         | 1.2885955707060912e-55 | 15.710157027986815 | 31862.0 |
| 3 | rs6772953            | 89451721  | G       | C         | 4.2053007111931054e-55 | 15.63499163743103  | 31733.0 |
| 3 | rs2117137            | 89525505  | A       | G         | 6.634070713893656e-55  | 15.60592546327857  | 32186.0 |

|   |                     |          |        |      |                        |                    |         |
|---|---------------------|----------|--------|------|------------------------|--------------------|---------|
| 3 | rs6771054           | 89489529 | T      | C    | 1.187567416322715e-54  | 15.568721771575609 | 31807.0 |
| 3 | rs7632502           | 89469453 | T      | A    | 1.3548350705909942e-54 | 15.560290064350387 | 31884.0 |
| 3 | rs7650184           | 89530057 | C      | A    | 1.4508910942888975e-54 | 15.555905297060995 | 32100.0 |
| 3 | rs7633500           | 89497082 | G      | A    | 3.353540540788501e-54  | 15.502173269547448 | 31754.0 |
| 3 | rs12637608          | 89551301 | T      | C    | 2.3682094318701987e-49 | 14.767651875512593 | 32107.0 |
| 3 | rs11918555          | 89541934 | C      | T    | 2.9732507515879407e-49 | 14.752306906494406 | 32145.0 |
| 3 | rs66757381          | 89561048 | C      | T    | 6.89975045802501e-49   | 14.695392527204035 | 32087.0 |
| 3 | rs7632427           | 89534377 | T      | C    | 7.745241742373457e-49  | 14.687560423691096 | 32186.0 |
| 3 | rs7652296           | 89587262 | A      | G    | 2.038268454556522e-48  | 14.621836584658427 | 32017.0 |
| 3 | rs724972            | 89581408 | A      | T    | 2.1511326499406396e-48 | 14.61816728392228  | 32029.0 |
| 3 | 3:89598352_GGT_G    | 89598352 | GGT    | G    | 3.926244060484671e-48  | 14.577139870253431 | 31649.0 |
| 3 | rs73145338          | 89594767 | C      | T    | 1.2489838155625544e-47 | 14.497908197764525 | 31947.0 |
| 3 | 3:89605220_AT_A     | 89605220 | AT     | A    | 1.3528406829227533e-47 | 14.492423510153527 | 31076.0 |
| 3 | rs7621573           | 89595252 | C      | T    | 1.423214629664844e-47  | 14.488940346980755 | 31919.0 |
| 3 | rs6551413           | 89640350 | C      | G    | 1.5924487000903963e-47 | 14.481220213742724 | 31866.0 |
| 3 | rs1520596           | 89645542 | T      | C    | 1.7336831258291088e-47 | 14.475378677028447 | 31804.0 |
| 3 | rs7635916           | 89633140 | G      | A    | 1.8185171058628946e-47 | 14.472093525538519 | 31929.0 |
| 3 | rs2346843           | 89590826 | C      | T    | 1.91652838353516e-47   | 14.46848289724526  | 31379.0 |
| 3 | rs73153219          | 89625902 | C      | T    | 2.0184888284954327e-47 | 14.464916810328946 | 31903.0 |
| 3 | rs66499884          | 89659012 | T      | G    | 2.1104002592478637e-47 | 14.461852616159408 | 31820.0 |
| 3 | rs6795325           | 89642054 | T      | C    | 2.153574542599331e-47  | 14.46045881801668  | 31873.0 |
| 3 | rs10511145          | 89597679 | C      | A    | 2.1770159658898093e-47 | 14.45971366159283  | 31919.0 |
| 3 | rs17027018          | 89604774 | C      | T    | 4.2359286376946544e-47 | 14.413823989224207 | 31904.0 |
| 3 | rs60243237          | 89694053 | C      | T    | 1.4182183353612012e-46 | 14.330146149982513 | 31971.0 |
| 3 | rs7637504           | 89702469 | A      | T    | 1.5850368649410514e-45 | 14.161530662606447 | 31992.0 |
| 3 | rs6551415           | 89705161 | G      | T    | 1.961831348329957e-45  | 14.14653693495054  | 31983.0 |
| 3 | rs7653735           | 89722185 | T      | A    | 2.160790038267325e-45  | 14.139740729766256 | 31893.0 |
| 3 | rs11925143          | 89723684 | G      | A    | 2.160790038267325e-45  | 14.139740729766256 | 31893.0 |
| 3 | 3:89578046_AT_A     | 89578046 | AT     | A    | 2.2104143297724543e-45 | 14.13814272149066  | 31525.0 |
| 3 | rs59381722          | 89701482 | T      | G    | 2.4554615106874172e-45 | 14.130741211099329 | 31957.0 |
| 3 | rs7613412           | 89724217 | A      | T    | 1.0552795041617076e-44 | 14.027693656968848 | 31857.0 |
| 3 | 3:89474553_GT_G     | 89474553 | GT     | G    | 1.6916164367285679e-44 | 13.994183344909814 | 29984.0 |
| 3 | rs138643396         | 89698092 | C      | CATA | 3.995100932935117e-44  | 13.932949496821193 | 31553.0 |
| 3 | rs6806912           | 89751353 | T      | C    | 4.635446937112305e-44  | 13.922329682644449 | 31703.0 |
| 3 | rs55747880          | 89612941 | C      | A    | 1.6963013271361605e-40 | 13.323220141295652 | 30731.0 |
| 3 | rs113141104         | 89519238 | C      | T    | 2.130285595219879e-34  | 12.230725065484496 | 32136.0 |
| 3 | rs73154904          | 89784599 | G      | A    | 2.3967314601994482e-34 | 12.221148969219243 | 31956.0 |
| 3 | 3:89521831_TGAAAG_T | 89521831 | TGAAAG | T    | 4.358711945226208e-34  | 12.172437081506205 | 31726.0 |
| 3 | 3:89521838_TTTG_T   | 89521838 | TTTG   | T    | 4.358711945226208e-34  | 12.172437081506205 | 31726.0 |
| 3 | rs2881488           | 89500488 | C      | G    | 4.5873648618979695e-34 | 12.168263763758773 | 32066.0 |
| 3 | rs73139131          | 89524686 | A      | G    | 4.712229754332276e-34  | 12.166071174532108 | 32169.0 |
| 3 | rs12152372          | 89500365 | T      | C    | 4.7277310452630885e-34 | 12.165803013136616 | 32067.0 |
| 3 | rs73139119          | 89522285 | C      | T    | 4.8121989583688715e-34 | 12.16435695313519  | 32175.0 |
| 3 | rs73139121          | 89522433 | A      | G    | 4.8121989583688715e-34 | 12.16435695313519  | 32175.0 |
| 3 | rs73139125          | 89524056 | A      | G    | 4.86615850845712e-34   | 12.163446324992645 | 32168.0 |
| 3 | rs752364173         | 89521820 | TTG    | T    | 5.086378933853708e-34  | 12.159831025145804 | 31522.0 |
| 3 | 3:89521060_CTAT_C   | 89521060 | CTAT   | C    | 5.2711575148126775e-34 | 12.156915572536152 | 32096.0 |
| 3 | rs1912965           | 89518332 | A      | G    | 5.4441508530182e-34    | 12.154276659348998 | 32174.0 |
| 3 | rs17026944          | 89521131 | G      | A    | 5.6822267158763476e-34 | 12.150778023459663 | 32174.0 |
| 3 | rs73139105          | 89519651 | T      | C    | 5.975161131929003e-34  | 12.146667797797086 | 32173.0 |
| 3 | rs73139281          | 89503890 | C      | T    | 6.294167261135255e-34  | 12.14241349126854  | 32072.0 |
| 3 | rs73139127          | 89524436 | T      | A    | 6.5079036662616175e-34 | 12.139681278125027 | 32169.0 |
| 3 | rs73139129          | 89524562 | A      | G    | 6.5079036662616175e-34 | 12.139681278125027 | 32169.0 |
| 3 | rs73139110          | 89521509 | C      | A    | 6.656015008185531e-34  | 12.137839750925092 | 32175.0 |



|   |                   |          |      |    |                        |                    |         |
|---|-------------------|----------|------|----|------------------------|--------------------|---------|
| 3 | rs1054750         | 89521725 | T    | C  | 6.656015008185531e-34  | 12.137839750925092 | 32175.0 |
| 3 | rs73139115        | 89521900 | G    | T  | 6.656015008185531e-34  | 12.137839750925092 | 32175.0 |
| 3 | rs73139117        | 89521965 | T    | G  | 6.656015008185531e-34  | 12.137839750925092 | 32175.0 |
| 3 | rs73139118        | 89522263 | A    | T  | 6.656015008185531e-34  | 12.137839750925092 | 32175.0 |
| 3 | rs17801380        | 89522483 | G    | T  | 6.656015008185531e-34  | 12.137839750925092 | 32175.0 |
| 3 | rs568140553       | 89507219 | C    | CT | 6.7105871920243474e-34 | 12.137171478228593 | 32166.0 |
| 3 | rs112335559       | 89525297 | A    | T  | 6.839014297255552e-34  | 12.135619865381939 | 32174.0 |
| 3 | rs1499780         | 89526072 | G    | C  | 6.8725714606096485e-34 | 12.135219208056874 | 32145.0 |
| 3 | rs73139284        | 89503958 | A    | G  | 7.385252451907957e-34  | 12.12932850647392  | 32070.0 |
| 3 | rs112297761       | 89521602 | T    | TC | 7.40428213065958e-34   | 12.1291177549397   | 32186.0 |
| 3 | rs6795074         | 89516652 | T    | C  | 7.405766000218071e-34  | 12.129101343872426 | 32173.0 |
| 3 | rs60759140        | 89499848 | G    | C  | 7.763155003845734e-34  | 12.12524093822266  | 32070.0 |
| 3 | 3:89525668_TTA_T  | 89525668 | TTA  | T  | 8.06368640239917e-34   | 12.122128956075336 | 32167.0 |
| 3 | rs1512183         | 89505054 | A    | T  | 8.173770519243504e-34  | 12.1210177944235   | 32069.0 |
| 3 | rs144317613       | 89525080 | T    | TA | 8.3388110064114e-34    | 12.119379460088535 | 32169.0 |
| 3 | rs73139286        | 89504295 | T    | A  | 8.524771043880922e-34  | 12.117571616383467 | 32069.0 |
| 3 | rs1912966         | 89518464 | T    | A  | 8.839216187399613e-34  | 12.114601996365206 | 32174.0 |
| 3 | rs73141108        | 89517119 | C    | T  | 9.825239001958323e-34  | 12.10592758305944  | 32172.0 |
| 3 | rs73139290        | 89505343 | G    | A  | 1.0297803921421346e-33 | 12.10207250311624  | 32085.0 |
| 3 | rs73141113        | 89518499 | T    | C  | 1.065092544241515e-33  | 12.099304856697852 | 32156.0 |
| 3 | rs73139296        | 89505734 | C    | T  | 1.1231023416837813e-33 | 12.09495027717014  | 32150.0 |
| 3 | rs73139276        | 89500196 | T    | A  | 1.2492816448238664e-33 | 12.086202969599947 | 32056.0 |
| 3 | rs73139288        | 89505327 | T    | G  | 1.2733488493443587e-33 | 12.084634669108985 | 32083.0 |
| 3 | rs1157608         | 89506464 | T    | G  | 1.2767054732686833e-33 | 12.084418283067858 | 32167.0 |
| 3 | rs73139302        | 89508186 | A    | G  | 1.2767054732686833e-33 | 12.084418283067858 | 32167.0 |
| 3 | rs2346836         | 89498096 | C    | A  | 1.3199988484344871e-33 | 12.081676914851734 | 32054.0 |
| 3 | rs59541469        | 89501671 | C    | T  | 1.3232551407927183e-33 | 12.081474349526589 | 32071.0 |
| 3 | rs73141104        | 89508390 | C    | T  | 1.4430070062537633e-33 | 12.07434957981874  | 32169.0 |
| 3 | rs7626735         | 89506958 | C    | A  | 1.760382248883153e-33  | 12.057984516973775 | 32167.0 |
| 3 | rs1157607         | 89506364 | C    | T  | 1.8259277218740954e-33 | 12.05497279599488  | 32165.0 |
| 3 | rs73139104        | 89519229 | A    | C  | 2.8204062080665332e-33 | 12.019095855578687 | 32089.0 |
| 3 | rs73137387        | 89464194 | T    | C  | 2.842747603927414e-33  | 12.018443824953088 | 32144.0 |
| 3 | 3:89502123_TTAG_T | 89502123 | TTAG | T  | 2.9227864031127075e-33 | 12.016148969924753 | 32014.0 |
| 3 | rs73137381        | 89458550 | A    | G  | 5.622845142782373e-33  | 11.96194615138918  | 32127.0 |
| 3 | rs73137382        | 89461363 | C    | G  | 5.685328557449497e-33  | 11.961028585156445 | 32132.0 |
| 3 | rs112087049       | 89509550 | G    | T  | 6.718465552659549e-33  | 11.947156671814835 | 31639.0 |
| 3 | rs12639506        | 89480265 | A    | G  | 6.734043461223811e-33  | 11.946964148289151 | 32060.0 |
| 3 | rs73137384        | 89463290 | C    | T  | 8.66546209322167e-33   | 11.925983443944228 | 32186.0 |
| 3 | rs1520594         | 89839468 | G    | A  | 1.4517297871720451e-32 | 11.882938313093266 | 31872.0 |
| 3 | rs1028013         | 89484268 | T    | C  | 1.851508682777583e-32  | 11.862593020508704 | 32034.0 |
| 3 | rs73137393        | 89471701 | T    | C  | 1.8734580303555448e-32 | 11.861606424818172 | 32052.0 |
| 3 | rs73139261        | 89492406 | A    | G  | 1.9480248430977406e-32 | 11.858338435873929 | 32061.0 |
| 3 | rs7650466         | 89530358 | C    | T  | 1.979202719921633e-32  | 11.857008702969685 | 32155.0 |
| 3 | rs12631313        | 89528461 | A    | T  | 2.1783627042218823e-32 | 11.848976041520336 | 32156.0 |
| 3 | rs73139135        | 89527937 | T    | C  | 2.201000048843261e-32  | 11.848109592133696 | 32139.0 |
| 3 | rs12636710        | 89528477 | G    | A  | 2.522427270223264e-32  | 11.83667964524282  | 32154.0 |
| 3 | rs73139134        | 89527709 | G    | C  | 2.5283320052248286e-32 | 11.83648348937165  | 32110.0 |
| 3 | rs73139147        | 89530347 | G    | A  | 2.6164438768368684e-32 | 11.833609247184715 | 32109.0 |
| 3 | rs73139139        | 89528313 | T    | G  | 2.7083798421587544e-32 | 11.83071096440336  | 32155.0 |
| 3 | rs3762717         | 89528948 | T    | C  | 2.774317311891175e-32  | 11.828691829388484 | 32156.0 |
| 3 | rs73139144        | 89529177 | G    | A  | 2.774317311891175e-32  | 11.828691829388484 | 32156.0 |
| 3 | rs73139148        | 89530956 | G    | A  | 3.2874115402937284e-32 | 11.814437652248008 | 32186.0 |
| 3 | rs1512185         | 89473615 | G    | A  | 3.700964839236591e-32  | 11.804474358473456 | 32067.0 |
| 3 | rs73139257        | 89482779 | A    | G  | 4.369686149111807e-32  | 11.790494337320304 | 32067.0 |

|   |                  |          |     |                      |                        |                    |         |
|---|------------------|----------|-----|----------------------|------------------------|--------------------|---------|
| 3 | rs2117138        | 89531522 | A   | G                    | 4.871407475534304e-32  | 11.781337173322179 | 32096.0 |
| 3 | rs73137395       | 89478753 | A   | C                    | 5.060927565432197e-32  | 11.778119988430715 | 32059.0 |
| 3 | rs73139133       | 89527708 | G   | A                    | 5.834765341784511e-32  | 11.766118834088745 | 32095.0 |
| 3 | rs12634269       | 89532768 | A   | C                    | 6.125068506026581e-32  | 11.762020560058415 | 32051.0 |
| 3 | rs12629165       | 89533017 | G   | A                    | 1.103532834613903e-31  | 11.71221888407099  | 32092.0 |
| 3 | rs12634341       | 89533031 | A   | C                    | 1.714240700584585e-31  | 11.674822052967135 | 32094.0 |
| 3 | rs7616322        | 89493283 | C   | T                    | 2.7285679952090175e-31 | 11.635229014656305 | 32042.0 |
| 3 | rs6793538        | 89987871 | G   | A                    | 4.679446434164816e-31  | 11.589114600238792 | 31188.0 |
| 3 | rs2346840        | 89533267 | T   | G                    | 5.410663614883453e-31  | 11.576670984323128 | 32123.0 |
| 3 | rs6551412        | 89496502 | G   | A                    | 5.959792887169778e-31  | 11.56837912162692  | 32039.0 |
| 3 | rs569866494      | 89526980 | G   | GA                   | 2.2488388462955567e-30 | 11.453867259517214 | 31755.0 |
| 3 | 3:89519266_GA_G  | 89519266 | GA  | G                    | 4.773109150773868e-30  | 11.388467439247075 | 30599.0 |
| 3 | rs566480002      | 89529769 | T   | TA                   | 5.416492877368453e-30  | 11.37744249145664  | 31365.0 |
| 3 | rs529961766      | 89520326 | G   | GA                   | 1.0843304562121236e-29 | 11.31673710829741  | 30260.0 |
| 3 | rs6800436        | 89516072 | G   | A                    | 1.449181050169444e-29  | 11.29127556806742  | 30313.0 |
| 3 | rs66708608       | 89486373 | C   | T                    | 2.5664867205642913e-29 | 11.240935296282306 | 32013.0 |
| 3 | rs56163827       | 89612938 | C   | A                    | 1.3964222474385536e-28 | 11.090412574898878 | 30447.0 |
| 3 | rs2048518        | 89533905 | T   | C                    | 8.038473720589526e-28  | 10.9327390764573   | 32180.0 |
| 3 | rs73144998       | 89534592 | G   | T                    | 8.958658375650495e-28  | 10.922902205199994 | 32183.0 |
| 3 | rs12638777       | 89537160 | C   | T                    | 8.958658375650495e-28  | 10.922902205199994 | 32183.0 |
| 3 | rs2048521        | 89534253 | G   | A                    | 8.975192792453661e-28  | 10.922734771102254 | 32181.0 |
| 3 | rs73145002       | 89537618 | T   | C                    | 9.295561610160961e-28  | 10.919549603285034 | 32183.0 |
| 3 | 3:89557699_GTA_G | 89557699 | GTA | G                    | 1.0925478181620514e-27 | 10.904865451302326 | 32125.0 |
| 3 | rs150837250      | 89522314 | A   | AGTT<br>ATAA<br>TTAG | 1.1042594287427312e-27 | 10.903895658106732 | 30757.0 |
| 3 | rs4857499        | 89541330 | C   | A                    | 1.1923476161134748e-27 | 10.896912525664392 | 32162.0 |
| 3 | rs2048519        | 89533978 | G   | A                    | 1.2037307074401732e-27 | 10.8960477120753   | 32181.0 |
| 3 | rs4857498        | 89540977 | G   | A                    | 1.2110706847543614e-27 | 10.89549435881797  | 32162.0 |
| 3 | rs3762718        | 89535066 | T   | G                    | 1.2641847900725812e-27 | 10.89158656337247  | 32185.0 |
| 3 | rs2196083        | 89536546 | T   | C                    | 1.2641847900725812e-27 | 10.89158656337247  | 32185.0 |
| 3 | rs12634044       | 89537651 | A   | G                    | 1.3123367016179446e-27 | 10.888182096847077 | 32185.0 |
| 3 | rs972030         | 89538498 | G   | T                    | 1.3396586199830622e-27 | 10.886305045473962 | 32179.0 |
| 3 | rs373216501      | 89603917 | A   | ATATT                | 1.367574677841199e-27  | 10.884425988856693 | 27080.0 |
| 3 | rs17026984       | 89544978 | G   | A                    | 1.5218490013063815e-27 | 10.874682379825847 | 32132.0 |
| 3 | rs7633599        | 89544591 | C   | A                    | 1.568441373658271e-27  | 10.871931839205699 | 32152.0 |
| 3 | rs7613315        | 89544773 | G   | C                    | 1.6283616117014822e-27 | 10.86851126198152  | 32151.0 |
| 3 | rs56371328       | 89539124 | G   | A                    | 1.6312453876536898e-27 | 10.868349804691038 | 32181.0 |
| 3 | rs73146961       | 89550459 | T   | C                    | 1.6581293311754257e-27 | 10.866858099295339 | 32131.0 |
| 3 | rs57902683       | 89539011 | C   | CA                   | 1.7661352654864078e-27 | 10.86109759207028  | 32173.0 |
| 3 | rs4857500        | 89541486 | T   | C                    | 1.7751396886867855e-27 | 10.860633230852383 | 32168.0 |
| 3 | rs1036285        | 89544061 | T   | C                    | 1.795792777099463e-27  | 10.85957690751417  | 32161.0 |
| 3 | 3:89541782_TTA_T | 89541782 | TTA | T                    | 1.8969587483156426e-27 | 10.854570790683413 | 32154.0 |
| 3 | rs12633609       | 89545727 | T   | G                    | 1.9447601976653147e-27 | 10.85229679794777  | 32134.0 |
| 3 | rs1512188        | 89546183 | A   | G                    | 1.9447601976653147e-27 | 10.85229679794777  | 32134.0 |
| 3 | rs73146943       | 89546728 | A   | G                    | 1.9447601976653147e-27 | 10.85229679794777  | 32134.0 |
| 3 | rs73146907       | 89538747 | G   | A                    | 2.116253886018867e-27  | 10.844571414725406 | 32185.0 |
| 3 | 3:89540269_AT_A  | 89540269 | AT  | A                    | 2.1434407087129462e-27 | 10.843404043329228 | 32096.0 |
| 3 | rs2117136        | 89542699 | A   | G                    | 2.257819071764473e-27  | 10.838648452146403 | 32165.0 |
| 3 | rs113675293      | 89539536 | C   | T                    | 2.2813820776397823e-27 | 10.837698487511911 | 32182.0 |
| 3 | rs73146926       | 89542293 | A   | G                    | 2.344895402352717e-27  | 10.835185554090504 | 32169.0 |
| 3 | rs138183278      | 89564090 | C   | CT                   | 2.381668974199593e-27  | 10.833761268306048 | 32112.0 |
| 3 | rs138490449      | 89561661 | A   | AT                   | 2.441484682372452e-27  | 10.831490476025945 | 32123.0 |
| 3 | rs55979407       | 89539275 | A   | G                    | 2.4584038954619587e-27 | 10.830858174952263 | 32182.0 |
| 3 | rs1512189        | 89546332 | A   | G                    | 2.472261533654048e-27  | 10.83034349685822  | 32107.0 |
| 3 | rs12632281       | 89547621 | G   | A                    | 2.5413479514140863e-27 | 10.827819548596482 | 32134.0 |

|   |                                                                   |          |                                                                  |   |                        |                    |         |
|---|-------------------------------------------------------------------|----------|------------------------------------------------------------------|---|------------------------|--------------------|---------|
| 3 | rs73146947                                                        | 89548135 | T                                                                | G | 2.5413479514140863e-27 | 10.827819548596482 | 32134.0 |
| 3 | rs73146950                                                        | 89548243 | T                                                                | C | 2.5413479514140863e-27 | 10.827819548596482 | 32134.0 |
| 3 | rs1567657                                                         | 89548519 | G                                                                | A | 2.5413479514140863e-27 | 10.827819548596482 | 32134.0 |
| 3 | rs1567658                                                         | 89548606 | T                                                                | A | 2.5413479514140863e-27 | 10.827819548596482 | 32134.0 |
| 3 | rs1039991                                                         | 89558311 | C                                                                | G | 2.5436700424053712e-27 | 10.827735901861944 | 32131.0 |
| 3 | rs73146980                                                        | 89558578 | C                                                                | A | 2.5436700424053712e-27 | 10.827735901861944 | 32131.0 |
| 3 | rs73146983                                                        | 89559082 | A                                                                | G | 2.5436700424053712e-27 | 10.827735901861944 | 32131.0 |
| 3 | rs6774870                                                         | 89564891 | C                                                                | T | 2.5436700424053712e-27 | 10.827735901861944 | 32131.0 |
| 3 | rs73146959                                                        | 89549970 | A                                                                | C | 2.576479687754328e-27  | 10.826562053908848 | 32133.0 |
| 3 | rs112404167                                                       | 89550630 | C                                                                | T | 2.576479687754328e-27  | 10.826562053908848 | 32133.0 |
| 3 | rs12637511                                                        | 89550844 | T                                                                | C | 2.576479687754328e-27  | 10.826562053908848 | 32133.0 |
| 3 | rs73146972                                                        | 89553348 | A                                                                | G | 2.576479687754328e-27  | 10.826562053908848 | 32133.0 |
| 3 | rs17026990                                                        | 89555257 | A                                                                | C | 2.6234700920161517e-27 | 10.824906418507693 | 32132.0 |
| 3 | rs73146960                                                        | 89550445 | T                                                                | C | 2.714492679559277e-27  | 10.821781397676618 | 32017.0 |
| 3 | rs73146954                                                        | 89549680 | C                                                                | G | 2.785313970805014e-27  | 10.819420996241135 | 32130.0 |
| 3 | rs73146956                                                        | 89549684 | G                                                                | T | 2.785313970805014e-27  | 10.819420996241135 | 32130.0 |
| 3 | rs111618480                                                       | 89552134 | T                                                                | C | 2.785313970805014e-27  | 10.819420996241135 | 32130.0 |
| 3 | rs2048520                                                         | 89534248 | T                                                                | C | 3.2622582074091816e-27 | 10.804924344952171 | 32186.0 |
| 3 | rs73147002                                                        | 89565128 | T                                                                | G | 3.3624115351557566e-27 | 10.802148764132427 | 32130.0 |
| 3 | rs73146976                                                        | 89557065 | T                                                                | C | 3.4152739040461376e-27 | 10.800716652592824 | 32133.0 |
| 3 | rs369052772                                                       | 89540272 | T                                                                | A | 3.4856607424536485e-27 | 10.798843527469863 | 32146.0 |
| 3 | rs73146992                                                        | 89562178 | A                                                                | G | 3.55820571596455e-27   | 10.796951818985901 | 32133.0 |
| 3 | rs73146995                                                        | 89562209 | T                                                                | C | 3.55820571596455e-27   | 10.796951818985901 | 32133.0 |
| 3 | rs73146968                                                        | 89552927 | A                                                                | G | 3.559918051182249e-27  | 10.796907631000972 | 32134.0 |
| 3 | rs6784577                                                         | 89564308 | A                                                                | G | 3.56034626322845e-27   | 10.796896583989813 | 32107.0 |
| 3 | rs1028012                                                         | 89549422 | C                                                                | T | 3.596139397862578e-27  | 10.795977819988911 | 32135.0 |
| 3 | rs17745025                                                        | 89549919 | T                                                                | C | 3.596139397862578e-27  | 10.795977819988911 | 32135.0 |
| 3 | rs12634697                                                        | 89550993 | G                                                                | A | 3.596139397862578e-27  | 10.795977819988911 | 32135.0 |
| 3 | rs12638168                                                        | 89551544 | T                                                                | C | 3.596139397862578e-27  | 10.795977819988911 | 32135.0 |
| 3 | rs73146970                                                        | 89553168 | A                                                                | G | 3.596139397862578e-27  | 10.795977819988911 | 32135.0 |
| 3 | 3:89544326_CGGTGGAAATC<br>TCCTTATTAAATTGTGGGCA<br>AGAGGCAACCCAT_C | 89544326 | CGGTGGAA<br>ATCTCCTTA<br>TTAAATTGT<br>GGGCAAGA<br>GGCAACCC<br>AT | C | 3.6140614841923615e-27 | 10.795521184434161 | 32153.0 |
| 3 | rs1039990                                                         | 89558086 | G                                                                | A | 3.663697144673911e-27  | 10.79426814613955  | 32132.0 |
| 3 | rs73146988                                                        | 89561044 | T                                                                | C | 3.743832503749657e-27  | 10.792280251745398 | 32129.0 |
| 3 | rs12629999                                                        | 89551518 | A                                                                | G | 3.866681469009881e-27  | 10.789313242686283 | 32099.0 |
| 3 | rs73146986                                                        | 89560884 | A                                                                | G | 3.9481125338653936e-27 | 10.787397626151623 | 32101.0 |
| 3 | rs12629758                                                        | 89556408 | A                                                                | G | 4.7695045012755785e-27 | 10.77000979539768  | 32135.0 |
| 3 | rs73149107                                                        | 89565849 | C                                                                | A | 4.8838291618050594e-27 | 10.76782870644882  | 32106.0 |
| 3 | 3:89550504_GCT_G                                                  | 89550504 | GCT                                                              | G | 8.460289213847959e-27  | 10.717113072636256 | 31977.0 |
| 3 | 3:89571180_TAGAG_T                                                | 89571180 | TAGAG                                                            | T | 1.1696079257089568e-26 | 10.68710837082095  | 32053.0 |
| 3 | rs56082199                                                        | 89586973 | A                                                                | G | 1.3923595360475923e-26 | 10.670923254454554 | 32053.0 |
| 3 | rs12637036                                                        | 89584170 | G                                                                | A | 1.4480352542814996e-26 | 10.667279828292077 | 32058.0 |
| 3 | rs7613900                                                         | 89588889 | A                                                                | T | 1.4549802246022167e-26 | 10.666835124426909 | 32015.0 |
| 3 | rs73145320                                                        | 89586535 | T                                                                | C | 1.539755857096151e-26  | 10.661570203527463 | 32049.0 |
| 3 | rs73145303                                                        | 89568714 | T                                                                | C | 1.6013161469637508e-26 | 10.65792417451105  | 32044.0 |
| 3 | rs73145310                                                        | 89578097 | T                                                                | C | 1.647701821151799e-26  | 10.655267555634452 | 32063.0 |
| 3 | rs73153218                                                        | 89619808 | G                                                                | A | 1.7082761933463243e-26 | 10.651907816874218 | 31826.0 |
| 3 | rs907548                                                          | 89574852 | C                                                                | T | 1.7267190726967966e-26 | 10.650908317236627 | 32069.0 |
| 3 | rs73145312                                                        | 89578575 | C                                                                | T | 1.7289737472607043e-26 | 10.650786853356921 | 32062.0 |
| 3 | rs73149115                                                        | 89568284 | C                                                                | T | 1.7565920462418609e-26 | 10.649311611969566 | 32023.0 |
| 3 | rs73145305                                                        | 89570713 | G                                                                | T | 1.9837772710432688e-26 | 10.637982715592027 | 32068.0 |
| 3 | rs73145304                                                        | 89568989 | C                                                                | T | 2.0477447933856712e-26 | 10.635024698625793 | 32060.0 |
| 3 | rs73149109                                                        | 89567344 | G                                                                | A | 2.1085133089568557e-26 | 10.632298265254553 | 32023.0 |

|   |                  |           |     |           |                        |                    |         |
|---|------------------|-----------|-----|-----------|------------------------|--------------------|---------|
| 3 | rs1080592        | 89567568  | T   | C         | 2.1085133089568557e-26 | 10.632298265254553 | 32023.0 |
| 3 | rs12633325       | 89566836  | A   | C         | 2.1453889243206907e-26 | 10.63068153462124  | 31972.0 |
| 3 | rs73145316       | 89580407  | C   | T         | 2.27813383747485e-26   | 10.625081380462733 | 32066.0 |
| 3 | rs73145307       | 89576040  | G   | A         | 2.388734992769955e-26  | 10.62065716033171  | 32069.0 |
| 3 | rs73145309       | 89576389  | C   | T         | 2.388734992769955e-26  | 10.62065716033171  | 32069.0 |
| 3 | rs113307255      | 89567826  | T   | C         | 2.4665604164515568e-26 | 10.617664114037382 | 32024.0 |
| 3 | rs73145328       | 89587686  | T   | C         | 2.5448092563605392e-26 | 10.61474772156756  | 32036.0 |
| 3 | rs73145332       | 89589327  | A   | C         | 2.821248872600302e-26  | 10.60511228947913  | 32000.0 |
| 3 | rs73145351       | 89607237  | C   | T         | 3.1918197968532016e-26 | 10.593569951098264 | 31968.0 |
| 3 | rs73145353       | 89607824  | G   | T         | 3.1918197968532016e-26 | 10.593569951098264 | 31968.0 |
| 3 | rs73145357       | 89611766  | T   | C         | 3.193786747773497e-26  | 10.593512301943477 | 31953.0 |
| 3 | rs73149113       | 89567867  | C   | T         | 3.3829301513281343e-26 | 10.588126962611044 | 32026.0 |
| 3 | rs73145345       | 89598696  | C   | A         | 3.5897451691503644e-26 | 10.582569943952826 | 31967.0 |
| 3 | rs73145336       | 89593317  | A   | G         | 4.4587697993596816e-26 | 10.56224325497722  | 31975.0 |
| 3 | rs2069183        | 89645017  | G   | A         | 4.653348539712592e-26  | 10.55823377885366  | 31917.0 |
| 3 | rs111835258      | 89601496  | G   | A         | 5.082531926373201e-26  | 10.549947808965586 | 31905.0 |
| 3 | rs148078210      | 89565641  | G   | GGTA<br>T | 5.75811034797151e-26   | 10.53821551275048  | 31675.0 |
| 3 | rs149898163      | 89568422  | T   | TTTC<br>C | 7.162306516475435e-26  | 10.517669723825133 | 31421.0 |
| 3 | rs2346837        | 89542599  | C   | T         | 1.0317838392087264e-25 | 10.483212344190592 | 32016.0 |
| 3 | rs73153241       | 89695319  | C   | G         | 1.327491623932497e-25  | 10.459360080939712 | 31963.0 |
| 3 | rs764684400      | 89443128  | AG  | A         | 1.335026547193961e-25  | 10.458823740849986 | 30348.0 |
| 3 | rs6551410        | 89442305  | T   | A         | 1.7743551880347218e-25 | 10.431831091972935 | 31084.0 |
| 3 | rs73153266       | 89720111  | A   | G         | 2.159855083524976e-25  | 10.413136701393666 | 31978.0 |
| 3 | rs7619303        | 89552554  | G   | A         | 2.2543435154844878e-25 | 10.40906094453326  | 31595.0 |
| 3 | rs113288647      | 89720352  | C   | T         | 2.2823775966376477e-25 | 10.407884226107942 | 31896.0 |
| 3 | rs4035593        | 89542601  | T   | TAA       | 2.3500044075822696e-25 | 10.40510355713966  | 32017.0 |
| 3 | 3:89532085_TA_T  | 89532085  | TA  | T         | 2.513042744421292e-25  | 10.398713040480953 | 24150.0 |
| 3 | rs73146965       | 89552553  | A   | G         | 2.5882888048917957e-25 | 10.39590105942823  | 31579.0 |
| 3 | rs7617395        | 89722541  | G   | T         | 3.174711903303252e-25  | 10.376415787949199 | 31896.0 |
| 3 | rs537614374      | 89606871  | T   | TA        | 4.1124934029191508e-25 | 10.351669897068911 | 31637.0 |
| 3 | rs73153262       | 89719269  | G   | T         | 4.553872931086922e-25  | 10.341906309116991 | 31979.0 |
| 3 | rs73153258       | 89715585  | G   | A         | 4.575222065087582e-25  | 10.34145816031753  | 31976.0 |
| 3 | rs1915304        | 89704393  | C   | T         | 4.736454700573093e-25  | 10.338139100563355 | 31977.0 |
| 3 | rs73153252       | 89712192  | C   | T         | 5.477206684587232e-25  | 10.324202488290256 | 31974.0 |
| 3 | 3:89626776_AT_A  | 89626776  | AT  | A         | 6.106209203019268e-25  | 10.31376372026957  | 31592.0 |
| 3 | 3:89704472_GCT_G | 89704472  | GCT | G         | 6.113704232416414e-25  | 10.313645870272843 | 27881.0 |
| 3 | rs73149103       | 89565651  | G   | A         | 7.737303881357452e-25  | 10.290994527806085 | 31555.0 |
| 3 | rs1979837        | 89590902  | T   | C         | 2.4915751946711942e-24 | 10.177789234306914 | 30154.0 |
| 3 | rs12633626       | 89744949  | G   | A         | 4.7877431650747086e-24 | 10.114022076773246 | 31874.0 |
| 3 | rs73153279       | 89727968  | T   | C         | 5.8474022923107146e-24 | 10.094422852826892 | 31876.0 |
| 3 | rs73153282       | 89728408  | C   | T         | 7.32060551870652e-24   | 10.072352115911162 | 31879.0 |
| 3 | rs73153283       | 89732193  | G   | T         | 1.3213678949018154e-23 | 10.014116821815577 | 31853.0 |
| 3 | 3:89590098_GT_G  | 89590098  | GT  | G         | 1.5469355360374415e-23 | 9.998518748257672  | 31214.0 |
| 3 | rs559264903      | 89578492  | T   | TA        | 1.6092464119171708e-23 | 9.994606779902801  | 31121.0 |
| 3 | rs111215243      | 89687803  | T   | A         | 3.149503083359805e-23  | 9.927857359632752  | 31459.0 |
| 3 | rs6787562        | 90010903  | G   | C         | 7.258310384788044e-23  | 9.844243642993883  | 31183.0 |
| 3 | rs819293         | 89613664  | G   | A         | 9.255914712165478e-23  | 9.819764907263902  | 31784.0 |
| 3 | rs6773817        | 89753400  | G   | A         | 1.844826967289189e-21  | 9.513426998689422  | 31935.0 |
| 3 | rs144848844      | 89400269  | A   | C         | 2.50370527865417e-21   | 9.481617913008145  | 29257.0 |
| 3 | rs6419884        | 89279467  | C   | T         | 4.17649897663145e-21   | 9.42808353144902   | 31866.0 |
| 3 | rs73153293       | 89756242  | C   | T         | 6.1617812355941376e-21 | 9.387197656703117  | 31920.0 |
| 3 | rs2279829        | 147106319 | C   | T         | 7.573075408782388e-21  | 9.365444630642157  | 31996.0 |
| 3 | rs145565219      | 89936402  | G   | A         | 1.1944220691778567e-20 | 9.317207737267145  | 31737.0 |
| 3 | rs6782527        | 89442369  | C   | T         | 3.271150066668919e-20  | 9.209674615429613  | 31621.0 |

|   |                                |           |                   |     |                        |                   |         |
|---|--------------------------------|-----------|-------------------|-----|------------------------|-------------------|---------|
| 3 | 3:89694510_GATA_G              | 89694510  | GATA              | G   | 3.433193121359274e-20  | 9.204483189261083 | 30795.0 |
| 3 | rs7645408                      | 89446132  | G                 | A   | 4.045385175624901e-20  | 9.18684328542306  | 31543.0 |
| 3 | rs28623022                     | 89448936  | T                 | A   | 4.454225705859832e-20  | 9.176477747067702 | 31456.0 |
| 3 | rs9844971                      | 89440509  | T                 | C   | 5.262933536408853e-20  | 9.158488384862592 | 31675.0 |
| 3 | rs6800041                      | 89448196  | T                 | C   | 7.608277643728348e-20  | 9.118625972109804 | 31475.0 |
| 3 | rs754715969                    | 147160015 | T                 | TAA | 1.0416242268842731e-19 | 9.084514591454818 | 27177.0 |
| 3 | rs201982816                    | 89448885  | T                 | TTA | 2.0911080496906448e-19 | 9.008386209361358 | 30354.0 |
| 3 | rs562459635                    | 89448888  | T                 | TG  | 2.0911080496906448e-19 | 9.008386209361358 | 30354.0 |
| 3 | rs9832305                      | 89392778  | T                 | C   | 2.3009071192842657e-19 | 8.997893093699291 | 31666.0 |
| 3 | rs9825569                      | 89431650  | T                 | C   | 4.2265574396489144e-19 | 8.93087413563343  | 32151.0 |
| 3 | rs62275019                     | 89433648  | T                 | G   | 4.903641336735189e-19  | 8.914422729666835 | 32140.0 |
| 3 | 3:89420088_TGTGCACCTAG<br>AC T | 89420088  | TGTGCACCT<br>AGAC | T   | 5.78589359814372e-19   | 8.89670304268948  | 31929.0 |
| 3 | rs57670516                     | 89419645  | T                 | C   | 6.132004368999415e-19  | 8.889616750436222 | 32109.0 |
| 3 | rs9864984                      | 89428776  | C                 | T   | 6.155152593018303e-19  | 8.889198061030989 | 32186.0 |
| 3 | rs9849029                      | 89433059  | A                 | G   | 6.628380410151539e-19  | 8.880963329487672 | 32120.0 |
| 3 | rs9854073                      | 89426589  | C                 | A   | 8.892735216675079e-19  | 8.848218577310432 | 32137.0 |
| 3 | rs1512908                      | 89340134  | G                 | A   | 9.474330731024583e-19  | 8.841144174158819 | 31919.0 |
| 3 | rs73154916                     | 89803713  | C                 | T   | 9.656893114307028e-19  | 8.839011788737258 | 31982.0 |
| 3 | rs62275018                     | 89423863  | A                 | G   | 9.801496775915032e-19  | 8.837350843530574 | 32149.0 |
| 3 | rs7615949                      | 89432683  | C                 | G   | 1.061883570710988e-18  | 8.828395113155755 | 32129.0 |
| 3 | 3:89924704_TG_T                | 89924704  | TG                | T   | 1.1510019724651969e-18 | 8.819375157488546 | 31633.0 |
| 3 | rs1879650                      | 89856887  | G                 | T   | 1.6387896280086018e-18 | 8.77972217451943  | 31965.0 |
| 3 | rs112407114                    | 89797398  | G                 | C   | 1.8425355728276288e-18 | 8.766532122875683 | 31939.0 |
| 3 | rs1284258                      | 89823487  | C                 | T   | 2.14719992770873e-18   | 8.749279105700076 | 32186.0 |
| 3 | rs73154925                     | 89859312  | T                 | C   | 2.1808392770051567e-18 | 8.747524553325581 | 31799.0 |
| 3 | rs73004625                     | 147095294 | T                 | C   | 2.423706873173051e-18  | 8.735597901822286 | 31731.0 |
| 3 | rs67707172                     | 89447021  | C                 | A   | 2.4966766720480126e-18 | 8.732244551160692 | 30152.0 |
| 3 | rs2175670                      | 89343044  | A                 | G   | 3.1296129582609436e-18 | 8.706659556826548 | 31912.0 |
| 3 | rs9863107                      | 89343789  | T                 | G   | 3.2462072002572397e-18 | 8.702510804966371 | 31911.0 |
| 3 | rs9852380                      | 89341738  | T                 | G   | 3.262505376219695e-18  | 8.70194262282431  | 31908.0 |
| 3 | rs59127701                     | 89291916  | T                 | TA  | 3.2754841893712824e-18 | 8.701492160079262 | 31881.0 |
| 3 | rs58858051                     | 89291909  | A                 | T   | 3.396892344367472e-18  | 8.69736173935998  | 31880.0 |
| 3 | rs9852722                      | 89341946  | T                 | C   | 3.405206809340993e-18  | 8.697084229821387 | 31907.0 |
| 3 | rs13064615                     | 89799433  | A                 | G   | 3.4107097332457774e-18 | 8.696900927946766 | 31816.0 |
| 3 | rs9829401                      | 89300610  | A                 | C   | 3.7458987955561315e-18 | 8.686253080969497 | 32159.0 |
| 3 | rs6776281                      | 89290164  | T                 | A   | 4.0302827024318935e-18 | 8.677932453670369 | 31882.0 |
| 3 | rs73151349                     | 89892899  | T                 | G   | 4.048371503249283e-18  | 8.677422993081567 | 31617.0 |
| 3 | 3:89333590_CT_C                | 89333590  | CT                | C   | 4.083687417036498e-18  | 8.676434785195742 | 31781.0 |
| 3 | rs6796339                      | 89286159  | C                 | T   | 4.1294159829279396e-18 | 8.675167671839697 | 31868.0 |
| 3 | rs9821666                      | 89339548  | G                 | T   | 5.586271478024964e-18  | 8.640714170790641 | 31958.0 |
| 3 | rs1567731                      | 89316027  | C                 | T   | 5.812381934196596e-18  | 8.636180168783785 | 32078.0 |
| 3 | rs62278164                     | 89292567  | T                 | C   | 5.858693536768759e-18  | 8.635273033201042 | 31930.0 |
| 3 | rs62278163                     | 89291836  | C                 | T   | 5.909990595892147e-18  | 8.634276469720103 | 31956.0 |
| 3 | rs73146387                     | 89291564  | G                 | C   | 6.4079549890623786e-18 | 8.625023401740412 | 31958.0 |
| 3 | rs6773815                      | 89299059  | C                 | T   | 7.708917550385314e-18  | 8.603844844148826 | 32186.0 |
| 3 | rs9863058                      | 89322805  | C                 | T   | 8.228066782170996e-18  | 8.596365207498073 | 31978.0 |
| 3 | rs2063590                      | 89323932  | G                 | C   | 8.363882389047915e-18  | 8.594485314629805 | 32011.0 |
| 3 | rs9862195                      | 89299752  | C                 | T   | 8.653699637624356e-18  | 8.590572564227545 | 32181.0 |
| 3 | rs62278168                     | 89301573  | A                 | G   | 9.182605808791333e-18  | 8.58375421517716  | 32155.0 |
| 3 | rs62278170                     | 89302617  | G                 | T   | 9.231769796630686e-18  | 8.583140237628704 | 32176.0 |
| 3 | rs4264747                      | 89882102  | A                 | G   | 9.264580242684526e-18  | 8.582732281836911 | 31760.0 |
| 3 | rs9875278                      | 89335463  | C                 | T   | 9.271056543436971e-18  | 8.582651925874993 | 32015.0 |
| 3 | rs7610812                      | 89544397  | G                 | T   | 9.705104529365587e-18  | 8.577388900075999 | 29707.0 |
| 3 | rs62278166                     | 89300779  | A                 | G   | 9.92208086755152e-18   | 8.574844443757444 | 32169.0 |

|   |                    |           |       |    |                        |                   |         |
|---|--------------------|-----------|-------|----|------------------------|-------------------|---------|
| 3 | rs62278161         | 89291713  | C     | G  | 1.0022267787003767e-17 | 8.573688041050904 | 31950.0 |
| 3 | rs9847087          | 89297308  | C     | G  | 1.052743992685718e-17  | 8.5680255980217   | 32158.0 |
| 3 | rs4857502          | 89324919  | G     | A  | 1.0531021273177992e-17 | 8.567986419948426 | 32013.0 |
| 3 | rs9851954          | 89297904  | G     | A  | 1.071998319617582e-17  | 8.565937706431143 | 32172.0 |
| 3 | rs17026816         | 89297593  | A     | G  | 1.1211909758681766e-17 | 8.56076699500289  | 32166.0 |
| 3 | rs62274986         | 89327148  | G     | A  | 1.1308317746376124e-17 | 8.559779924041887 | 32018.0 |
| 3 | rs2137487          | 89325520  | C     | G  | 1.1328164069722655e-17 | 8.559577758972743 | 32017.0 |
| 3 | rs6786328          | 89298926  | A     | G  | 1.16381596454475e-17   | 8.556464557515906 | 32161.0 |
| 3 | rs113895673        | 89917796  | G     | C  | 1.1979802133523987e-17 | 8.553126943534943 | 31531.0 |
| 3 | rs4857497          | 89294149  | T     | G  | 1.2207436491401375e-17 | 8.550954857680994 | 32167.0 |
| 3 | rs6786204          | 89298813  | A     | C  | 1.2781140153784774e-17 | 8.545653098354157 | 32162.0 |
| 3 | rs9883541          | 89294657  | T     | C  | 1.2920815928464792e-17 | 8.544397880558034 | 32158.0 |
| 3 | rs62278171         | 89305928  | G     | A  | 1.4548602030378493e-17 | 8.53068313668469  | 32124.0 |
| 3 | rs13062221         | 89778009  | T     | C  | 1.5450578954548635e-17 | 8.523722318525921 | 31522.0 |
| 3 | rs28620812         | 89305668  | C     | T  | 1.698189223331339e-17  | 8.512775324696976 | 32093.0 |
| 3 | rs17738248         | 89296363  | C     | A  | 1.698764977855183e-17  | 8.51273603231002  | 32144.0 |
| 3 | rs62278172         | 89306038  | G     | A  | 1.7096344562709778e-17 | 8.511996699837841 | 32099.0 |
| 3 | rs993187           | 89314820  | A     | G  | 1.7623995448202314e-17 | 8.50847232418279  | 32082.0 |
| 3 | rs17800551         | 89317315  | G     | T  | 1.8084899014844495e-17 | 8.50547795121253  | 32016.0 |
| 3 | rs13316356         | 89309959  | C     | A  | 1.8744651902973194e-17 | 8.501320211293205 | 32107.0 |
| 3 | rs17800347         | 89314429  | T     | G  | 1.8976319374674594e-17 | 8.499894431211366 | 32083.0 |
| 3 | 3:89318905_TC_T    | 89318905  | TC    | T  | 2.1277451210908605e-17 | 8.486597848149406 | 31900.0 |
| 3 | rs62274981         | 89310605  | G     | T  | 2.2533247923934874e-17 | 8.479928444534966 | 32098.0 |
| 3 | rs62274982         | 89310731  | G     | A  | 2.290802471486581e-17  | 8.478009002136924 | 32098.0 |
| 3 | rs9866618          | 89319577  | T     | C  | 2.4572131401868222e-17 | 8.46984427676608  | 32001.0 |
| 3 | rs993186           | 89314862  | T     | G  | 2.499367594878629e-17  | 8.467862659920447 | 32089.0 |
| 3 | rs9848971          | 89279394  | A     | G  | 2.5313863138568422e-17 | 8.466379420716931 | 31860.0 |
| 3 | rs373013392        | 89439750  | CA    | C  | 2.696684065970805e-17  | 8.45900503187241  | 29576.0 |
| 3 | rs62274984         | 89318317  | G     | A  | 2.754619989965204e-17  | 8.45652552156826  | 32008.0 |
| 3 | rs2137488          | 89308704  | A     | G  | 2.958124275774189e-17  | 8.448206261721108 | 32086.0 |
| 3 | rs28834186         | 89305272  | G     | A  | 4.1665012565082885e-17 | 8.408115677146737 | 32023.0 |
| 3 | rs9829367          | 89660010  | A     | T  | 4.665674966354006e-17  | 8.394830331937165 | 28964.0 |
| 3 | rs6794975          | 89292824  | G     | A  | 5.622927218930671e-17  | 8.372874935503052 | 32018.0 |
| 3 | rs1503729          | 147098210 | A     | G  | 6.965716865818574e-17  | 8.347611655838868 | 31870.0 |
| 3 | rs1398534          | 89329307  | A     | G  | 8.401730566528879e-17  | 8.325438274921273 | 31802.0 |
| 3 | rs1398531          | 89289709  | G     | T  | 9.920486473570192e-17  | 8.30573327027642  | 31635.0 |
| 3 | 3:89428011_CATCA_C | 89428011  | CATCA | C  | 1.0768396030530895e-16 | 8.29599069920798  | 30229.0 |
| 3 | rs1512907          | 89355961  | T     | C  | 1.1795876848197795e-16 | 8.28515156268433  | 32009.0 |
| 3 | rs73153260         | 89718078  | G     | A  | 1.217972640429066e-16  | 8.28133964122349  | 31471.0 |
| 3 | rs34756405         | 89344320  | G     | GA | 1.651896013077431e-16  | 8.244978729211276 | 31802.0 |
| 3 | rs9310121          | 89378987  | A     | G  | 1.7942389623803234e-16 | 8.23508920121678  | 31893.0 |
| 3 | rs9833400          | 89389507  | A     | G  | 1.7989317139833846e-16 | 8.23477649520648  | 31805.0 |
| 3 | rs6768381          | 89358071  | T     | C  | 1.832139780118669e-16  | 8.23258635790944  | 32047.0 |
| 3 | rs4449340          | 89323876  | C     | T  | 1.931290901172546e-16  | 8.22627267426393  | 32166.0 |
| 3 | rs13088663         | 89360266  | G     | T  | 1.9700777459114611e-16 | 8.223889402414693 | 32038.0 |
| 3 | rs9836060          | 89405548  | A     | G  | 1.97953915108408e-16   | 8.22331506217326  | 29812.0 |
| 3 | rs58036688         | 89369748  | C     | CT | 2.0390822675046563e-16 | 8.219761532057811 | 31994.0 |
| 3 | rs772938042        | 89344535  | ACCT  | A  | 2.0493209970897519e-16 | 8.219160809819899 | 31819.0 |
| 3 | rs145483821        | 89344540  | T     | G  | 2.0493209970897519e-16 | 8.219160809819899 | 31819.0 |
| 3 | rs9846844          | 89379639  | G     | A  | 2.1497145051334567e-16 | 8.21342252392949  | 31872.0 |
| 3 | rs9310122          | 89379408  | A     | G  | 2.194829151720302e-16  | 8.210929399727403 | 31881.0 |
| 3 | rs528144226        | 89394756  | C     | CT | 2.229402377691001e-16  | 8.20905277181706  | 29234.0 |
| 3 | rs9866959          | 89379935  | T     | C  | 2.4037845562896364e-16 | 8.200004288383518 | 31873.0 |
| 3 | rs7619025          | 89368629  | C     | A  | 2.4502198462010956e-16 | 8.197703897151381 | 32116.0 |

|   |                  |           |    |   |                        |                   |         |
|---|------------------|-----------|----|---|------------------------|-------------------|---------|
| 3 | rs34468928       | 89431649  | A  | C | 2.4755876354110865e-16 | 8.196465269918455 | 30247.0 |
| 3 | rs1512911        | 89348525  | T  | C | 2.537334383798858e-16  | 8.193501906304915 | 31960.0 |
| 3 | rs59969878       | 89369856  | G  | A | 2.758078411351061e-16  | 8.183460006426648 | 32107.0 |
| 3 | rs9310119        | 89378042  | C  | G | 2.791650024531702e-16  | 8.182002611233706 | 31917.0 |
| 3 | rs954964         | 89355632  | A  | G | 2.802865119614386e-16  | 8.181519593910629 | 31959.0 |
| 3 | rs35173319       | 89386361  | G  | T | 2.8348226461549136e-16 | 8.180153608320891 | 31843.0 |
| 3 | rs62274987       | 89334443  | C  | A | 2.8573927711274628e-16 | 8.179197990698547 | 32173.0 |
| 3 | rs9877514        | 89330825  | C  | T | 2.9444267370133904e-16 | 8.17558135812544  | 32174.0 |
| 3 | rs12495537       | 89347020  | A  | G | 2.945043814387409e-16  | 8.175556093978344 | 31955.0 |
| 3 | rs9873545        | 89377717  | A  | G | 2.9920316990224404e-16 | 8.173647499802309 | 31932.0 |
| 3 | rs907712         | 89326567  | C  | T | 3.03186612567399e-16   | 8.172052469307966 | 32175.0 |
| 3 | rs9289747        | 147100140 | A  | C | 3.1209275528822503e-16 | 8.168559773669013 | 31914.0 |
| 3 | rs9845870        | 89345921  | T  | C | 3.1299833872270804e-16 | 8.168210152396485 | 31962.0 |
| 3 | rs3852000        | 147116084 | A  | G | 3.162629653508853e-16  | 8.166957991405937 | 31946.0 |
| 3 | rs1040017        | 89329632  | T  | G | 3.359417418417972e-16  | 8.15966978682056  | 32149.0 |
| 3 | rs1398532        | 89367901  | T  | C | 3.3616450787921624e-16 | 8.159589715652498 | 32186.0 |
| 3 | rs9809011        | 89349617  | A  | G | 3.4558186461469287e-16 | 8.156251707917361 | 31934.0 |
| 3 | rs9817553        | 89384566  | T  | G | 3.484898068994305e-16  | 8.155239019239993 | 31827.0 |
| 3 | rs35448293       | 89386010  | A  | G | 3.5644911563780554e-16 | 8.152509440132665 | 31821.0 |
| 3 | rs1398535        | 89326021  | G  | A | 3.6600546633079487e-16 | 8.149310373353723 | 32174.0 |
| 3 | rs13076853       | 89382776  | A  | C | 3.7202290092231295e-16 | 8.147337958248695 | 31838.0 |
| 3 | rs11923303       | 89380944  | G  | A | 3.97422124159334e-16   | 8.139344969200003 | 31870.0 |
| 3 | rs9866945        | 89349818  | T  | C | 4.189703155278116e-16  | 8.132949176904534 | 31909.0 |
| 3 | rs7644070        | 89370107  | G  | A | 4.2047960137992436e-16 | 8.132513428276992 | 32113.0 |
| 3 | rs9990016        | 89364033  | G  | A | 4.2105476304644517e-16 | 8.132347777834422 | 32085.0 |
| 3 | rs9833437        | 89283869  | C  | T | 4.272137974683421e-16  | 8.130587783303412 | 31710.0 |
| 3 | rs1512910        | 89332453  | A  | G | 4.335791725058324e-16  | 8.128794909007764 | 32186.0 |
| 3 | rs1016584        | 89343169  | C  | T | 4.338585445549007e-16  | 8.128716816409355 | 31968.0 |
| 3 | rs28675360       | 89386151  | C  | T | 4.740638079629221e-16  | 8.117965423038127 | 31818.0 |
| 3 | rs12636413       | 147191972 | G  | C | 4.865408802094442e-16  | 8.11481114327969  | 31922.0 |
| 3 | rs13100388       | 89383148  | T  | A | 4.956322786734662e-16  | 8.11256258932043  | 31850.0 |
| 3 | rs35511518       | 89383683  | T  | C | 5.085838501549347e-16  | 8.109428526949532 | 31834.0 |
| 3 | rs2089076        | 147180677 | C  | A | 5.101070326088081e-16  | 8.10906512345137  | 31925.0 |
| 3 | rs11128072       | 89317917  | C  | T | 6.3884032510978625e-16 | 8.081673353162671 | 32063.0 |
| 3 | rs67851870       | 17554860  | A  | G | 6.57350173000865e-16   | 8.078190213181902 | 31950.0 |
| 3 | rs62273364       | 147111779 | T  | C | 6.724550735472953e-16  | 8.075418685477322 | 31938.0 |
| 3 | rs17800641       | 89320454  | A  | G | 6.843340594797125e-16  | 8.073281820694675 | 32063.0 |
| 3 | rs112856289      | 89404980  | T  | A | 6.848446444420301e-16  | 8.073190794781219 | 29824.0 |
| 3 | rs994129         | 89318462  | A  | G | 6.891700170909206e-16  | 8.0724223490608   | 32061.0 |
| 3 | rs9879028        | 89273019  | G  | A | 7.164296633585105e-16  | 8.067686078715036 | 31785.0 |
| 3 | rs9289750        | 147169065 | C  | G | 7.265112748616537e-16  | 8.065979287593262 | 31877.0 |
| 3 | rs56318686       | 147171254 | G  | A | 7.351453096910442e-16  | 8.06453601693495  | 31871.0 |
| 3 | rs56224184       | 147171246 | T  | G | 7.635790380704428e-16  | 8.059898371865003 | 31878.0 |
| 3 | rs6551409        | 89302171  | G  | T | 7.952287630892564e-16  | 8.054932200088661 | 32119.0 |
| 3 | rs9310117        | 89275906  | T  | C | 8.017158987083697e-16  | 8.053938383547427 | 31866.0 |
| 3 | rs9853389        | 89312308  | T  | C | 8.339574438911184e-16  | 8.049113702125544 | 32011.0 |
| 3 | rs9838512        | 89284596  | G  | A | 8.524184048897732e-16  | 8.046433256280805 | 31918.0 |
| 3 | rs16859501       | 147200660 | G  | C | 8.82173154810002e-16   | 8.042231103449511 | 31773.0 |
| 3 | rs6771477        | 89293142  | C  | A | 9.446929045130196e-16  | 8.033838810474531 | 32004.0 |
| 3 | rs9836340        | 89405754  | A  | G | 9.63206523303085e-16   | 8.031458505064485 | 29233.0 |
| 3 | rs9868782        | 89384121  | G  | A | 1.0247886729169184e-15 | 8.023853072235863 | 31706.0 |
| 3 | 3:89302973_GT_G  | 89302973  | GT | G | 1.0424410622937103e-15 | 8.021755940503175 | 32047.0 |
| 3 | rs9842599        | 89407256  | A  | G | 1.070115135273004e-15  | 8.018537616317486 | 29280.0 |
| 3 | 3:147180141_CT_C | 147180141 | CT | C | 1.0895012780350197e-15 | 8.01633159742598  | 31217.0 |

|   |                   |           |     |     |                        |                    |         |
|---|-------------------|-----------|-----|-----|------------------------|--------------------|---------|
| 3 | rs9817310         | 89280754  | C   | T   | 1.0897083731700632e-15 | 8.016308240682188  | 31880.0 |
| 3 | rs6771336         | 89293015  | C   | T   | 1.0923097951196077e-15 | 8.016015217231583  | 32000.0 |
| 3 | rs6770978         | 89286172  | G   | A   | 1.1091590005535587e-15 | 8.014133812173496  | 31841.0 |
| 3 | rs1567732         | 89315893  | G   | A   | 1.1184622415019417e-15 | 8.013107028642871  | 32060.0 |
| 3 | rs4857496         | 89294023  | A   | T   | 1.145918117882314e-15  | 8.010125107476027  | 32109.0 |
| 3 | rs9837346         | 89280847  | T   | C   | 1.1544399637944396e-15 | 8.009213869868061  | 31880.0 |
| 3 | rs9809046         | 89273974  | G   | C   | 1.1557965041419524e-15 | 8.009069427187951  | 31835.0 |
| 3 | rs9877953         | 89295480  | A   | T   | 1.1710152669556687e-15 | 8.007460302623857  | 32111.0 |
| 3 | rs7631682         | 89394143  | A   | C   | 1.440783058665348e-15  | 7.981916655272943  | 29214.0 |
| 3 | rs9833875         | 147134032 | A   | G   | 1.450201728718655e-15  | 7.981112534032029  | 31890.0 |
| 3 | rs1512912         | 89307931  | C   | T   | 1.453104338529484e-15  | 7.980865759714201  | 32061.0 |
| 3 | rs58262807        | 147109829 | T   | C   | 1.4719346338627097e-15 | 7.979276539973727  | 31940.0 |
| 3 | rs150021232       | 89408982  | T   | C   | 1.6503407680220206e-15 | 7.965142056722393  | 29889.0 |
| 3 | rs9860266         | 89394547  | A   | T   | 1.7672933374597318e-15 | 7.956671343700322  | 29206.0 |
| 3 | rs9867299         | 89300497  | G   | A   | 1.7787347082262198e-15 | 7.955872523474218  | 31952.0 |
| 3 | rs9818183         | 147174864 | T   | C   | 2.049509435997693e-15  | 7.9383121969436585 | 31922.0 |
| 3 | rs1566797         | 147172921 | T   | G   | 2.0985157931753328e-15 | 7.935380133841058  | 31880.0 |
| 3 | rs11720653        | 17439510  | T   | C   | 2.2004373846671023e-15 | 7.929492223330338  | 32186.0 |
| 3 | rs6765994         | 147189001 | A   | G   | 2.303109023185991e-15  | 7.923826511492237  | 31918.0 |
| 3 | rs28885734        | 89305269  | A   | T   | 2.3034253997348907e-15 | 7.923809440276942  | 31961.0 |
| 3 | rs6802591         | 147194290 | T   | C   | 2.328795664892687e-15  | 7.922447960454446  | 31915.0 |
| 3 | rs13321297        | 17528764  | T   | A   | 2.7982495804173758e-15 | 7.899588828893387  | 31990.0 |
| 3 | rs9870741         | 17407930  | T   | G   | 2.820351945654182e-15  | 7.898608066182803  | 32113.0 |
| 3 | rs9820816         | 147170593 | T   | C   | 2.8330456111279296e-15 | 7.898048217666086  | 31878.0 |
| 3 | rs17801001        | 89414555  | A   | C   | 3.1065918857493598e-15 | 7.886548364947201  | 29381.0 |
| 3 | rs137962487       | 147220939 | T   | TTC | 3.6126883903627855e-15 | 7.86768325878388   | 31715.0 |
| 3 | rs73145317        | 89583712  | T   | C   | 3.70079807346588e-15   | 7.864667260354607  | 31386.0 |
| 3 | rs7428532         | 89281752  | G   | A   | 4.78593526501675e-15   | 7.83241321968594   | 31656.0 |
| 3 | rs9852407         | 147148217 | A   | G   | 4.9562633891476926e-15 | 7.8280166437604946 | 31905.0 |
| 3 | rs56778250        | 147139132 | A   | G   | 5.153512751591107e-15  | 7.8231073337130175 | 31908.0 |
| 3 | rs4377462         | 147164159 | T   | C   | 5.215831066851714e-15  | 7.821594700014725  | 31935.0 |
| 3 | rs2202286         | 147149477 | A   | T   | 5.310213780059834e-15  | 7.819337320963037  | 31917.0 |
| 3 | rs9680882         | 147154084 | A   | G   | 5.375600861317765e-15  | 7.817796480680863  | 31922.0 |
| 3 | rs62275016        | 89414583  | A   | G   | 5.384633121519347e-15  | 7.817585088019173  | 29386.0 |
| 3 | 3:147129057_AAC_A | 147129057 | AAC | A   | 5.677729225187083e-15  | 7.8109083480712425 | 31668.0 |
| 3 | rs62275015        | 89408594  | C   | A   | 6.3607084979239944e-15 | 7.796580830294457  | 29297.0 |
| 3 | rs9289749         | 147142513 | A   | G   | 6.881875997838025e-15  | 7.786632473971232  | 31895.0 |
| 3 | rs872976          | 89326991  | C   | A   | 7.679838862291146e-15  | 7.772753029236783  | 32100.0 |
| 3 | rs576273791       | 89285743  | A   | AG  | 8.246924495012534e-15  | 7.763727106720131  | 30860.0 |
| 3 | rs870899          | 89417171  | C   | T   | 9.568840028389665e-15  | 7.744858429243394  | 29488.0 |
| 3 | rs870898          | 89417064  | C   | T   | 1.1842286210217828e-14 | 7.717726612310463  | 29491.0 |
| 3 | rs17801031        | 89415802  | C   | A   | 1.2870349062480923e-14 | 7.707105411881276  | 29417.0 |
| 3 | rs535492055       | 147147025 | G   | GA  | 1.3033953230812089e-14 | 7.705492597513938  | 31263.0 |
| 3 | rs9289748         | 147137976 | T   | G   | 1.3227318874282768e-14 | 7.703611882766221  | 31902.0 |
| 3 | rs55787722        | 90012103  | C   | T   | 1.4987543019569104e-14 | 7.687638615981567  | 31155.0 |
| 3 | rs111211173       | 89660044  | T   | C   | 1.717167251768538e-14  | 7.670208697012378  | 26868.0 |
| 3 | rs9862638         | 89373598  | T   | C   | 2.0129562018472328e-14 | 7.649797776205621  | 31860.0 |
| 3 | rs1521800         | 90001588  | G   | T   | 2.157082583690568e-14  | 7.640900176030357  | 32186.0 |
| 3 | rs9880313         | 89373637  | A   | G   | 2.4448913188963245e-14 | 7.624759836514331  | 31857.0 |
| 3 | rs35317084        | 89354462  | C   | T   | 3.72354644931431e-14   | 7.5703030194439815 | 30628.0 |
| 3 | rs112252173       | 89525767  | A   | T   | 3.7962811043889496e-14 | 7.5677896247569345 | 26047.0 |
| 3 | rs11916858        | 147140680 | T   | G   | 6.068879942107278e-14  | 7.506587022094298  | 31932.0 |
| 3 | rs68153678        | 147203820 | A   | G   | 9.462480284891812e-14  | 7.448196516358862  | 31730.0 |
| 3 | rs12638746        | 89331055  | G   | A   | 1.0074834603733543e-13 | 7.439917307879063  | 31643.0 |



|   |                    |           |       |     |                        |                    |         |
|---|--------------------|-----------|-------|-----|------------------------|--------------------|---------|
| 3 | rs9310120          | 89378413  | T     | C   | 1.1062104678739018e-13 | 7.427557803255984  | 31754.0 |
| 3 | rs9869999          | 17717340  | G     | T   | 1.2280475406069287e-13 | 7.413720326905844  | 31820.0 |
| 3 | rs138801589        | 89561919  | A     | AGT | 1.5513721632938339e-13 | 7.3826777408603155 | 22126.0 |
| 3 | rs752023841        | 89618888  | TA    | T   | 1.6449582191582022e-13 | 7.37487783334365   | 22221.0 |
| 3 | rs9858940          | 147207565 | C     | T   | 2.0531881707418883e-13 | 7.345286503310769  | 31610.0 |
| 3 | rs112604674        | 89989681  | C     | T   | 2.1128943782207192e-13 | 7.341451679415924  | 31173.0 |
| 3 | rs924761           | 147224071 | G     | C   | 2.153897950954789e-13  | 7.338879266459442  | 31395.0 |
| 3 | rs7640489          | 147223564 | A     | G   | 2.1884763941897758e-13 | 7.336747061559472  | 31391.0 |
| 3 | rs9858966          | 147207613 | C     | T   | 2.2890964728783343e-13 | 7.3307257678749025 | 31611.0 |
| 3 | rs9883675          | 90310464  | A     | G   | 2.6314893301971564e-13 | 7.312023571601587  | 31657.0 |
| 3 | rs7631038          | 147220482 | A     | G   | 3.0904221471336187e-13 | 7.290397341398351  | 31632.0 |
| 3 | rs924763           | 147218975 | T     | C   | 3.161924299830873e-13  | 7.287315259977714  | 31633.0 |
| 3 | rs13085441         | 17738547  | T     | C   | 3.1894025473255797e-13 | 7.286148991381482  | 31883.0 |
| 3 | rs9847935          | 147212708 | A     | G   | 3.2558273554026603e-13 | 7.283369968645599  | 31643.0 |
| 3 | rs12632762         | 147209965 | A     | C   | 3.3132928390496866e-13 | 7.281010339941561  | 31639.0 |
| 3 | rs9289752          | 147212354 | G     | A   | 3.3338712775669663e-13 | 7.280175117567388  | 31642.0 |
| 3 | rs4611784          | 147220252 | G     | C   | 3.597281601836409e-13  | 7.2699095967359675 | 31630.0 |
| 3 | rs6788190          | 17786057  | T     | C   | 4.808135006133577e-13  | 7.230614473825928  | 31655.0 |
| 3 | rs9844783          | 147220661 | T     | G   | 5.596292760886334e-13  | 7.20997310894746   | 31616.0 |
| 3 | rs9682090          | 90315330  | C     | T   | 5.753782715324425e-13  | 7.206193021222365  | 31927.0 |
| 3 | rs6797260          | 89302486  | A     | T   | 6.150411580820877e-13  | 7.197105632084337  | 31635.0 |
| 3 | rs9713415          | 90307719  | C     | G   | 6.555171023066513e-13  | 7.188406797270695  | 31946.0 |
| 3 | rs6551461          | 90286317  | T     | A   | 6.872856080532412e-13  | 7.181941043501119  | 32051.0 |
| 3 | rs9310523          | 17626394  | C     | T   | 7.182387975948142e-13  | 7.175917459195283  | 31999.0 |
| 3 | rs9865864          | 147224629 | T     | C   | 7.277636008166256e-13  | 7.1741151080564585 | 31502.0 |
| 3 | rs9985472          | 17681459  | A     | G   | 7.877209025694796e-13  | 7.163275024742397  | 31984.0 |
| 3 | rs7637642          | 90034785  | C     | G   | 8.056250635593625e-13  | 7.160194786552596  | 31876.0 |
| 3 | rs28708984         | 90041154  | T     | G   | 8.375607221247537e-13  | 7.1548637453750885 | 31887.0 |
| 3 | rs61039064         | 90044732  | C     | G   | 8.560640792937313e-13  | 7.151865532335742  | 31927.0 |
| 3 | rs13075167         | 89303172  | T     | C   | 8.797288157993054e-13  | 7.148122359079532  | 31620.0 |
| 3 | rs9855515          | 17679106  | G     | A   | 8.947197393795441e-13  | 7.1458019627795935 | 31987.0 |
| 3 | 3:17727954_CTAAT_C | 17727954  | CTAAT | C   | 9.236661468926549e-13  | 7.141427463626982  | 31734.0 |
| 3 | rs6804837          | 17787399  | G     | A   | 9.995804976644642e-13  | 7.130564597352464  | 31733.0 |
| 3 | rs4908969          | 17779407  | T     | C   | 1.256481209935759e-12  | 7.099016158026602  | 31843.0 |
| 3 | rs6577617          | 17715644  | G     | T   | 1.260188911620979e-12  | 7.098608875569947  | 31751.0 |
| 3 | rs13083917         | 17713516  | T     | A   | 1.3968217470519504e-12 | 7.0843661195827625 | 31932.0 |
| 3 | rs9681644          | 17659105  | C     | T   | 1.398782844405605e-12  | 7.0841718079927185 | 31340.0 |
| 3 | rs9631465          | 147107606 | A     | G   | 1.439950419803685e-12  | 7.080153337097938  | 31934.0 |
| 3 | rs9681893          | 17757024  | T     | A   | 1.4689738684642383e-12 | 7.0773874708478015 | 31896.0 |
| 3 | 3:17796107_TG_T    | 17796107  | TG    | T   | 1.495777063840084e-12  | 7.074880402103785  | 31585.0 |
| 3 | rs4431138          | 17749777  | G     | C   | 1.5043214900468253e-12 | 7.074090447549058  | 31898.0 |
| 3 | rs12634674         | 17704685  | T     | G   | 1.507208674578149e-12  | 7.073824514545777  | 31935.0 |
| 3 | rs6577619          | 17715678  | C     | T   | 1.5442490690737242e-12 | 7.070456438785641  | 31758.0 |
| 3 | rs11717504         | 90179080  | A     | T   | 1.6076911427963519e-12 | 7.064867679630378  | 31740.0 |
| 3 | rs4908963          | 17758260  | T     | C   | 1.6195377460790889e-12 | 7.063848104993688  | 31887.0 |
| 3 | rs12631291         | 17758297  | G     | A   | 1.6195377460790889e-12 | 7.063848104993688  | 31887.0 |
| 3 | rs34786175         | 17717997  | C     | T   | 1.6491084078515494e-12 | 7.061334699156908  | 31768.0 |
| 3 | 3:17758749_CA_C    | 17758749  | CA    | C   | 1.6788074629960413e-12 | 7.058854495169465  | 31235.0 |
| 3 | rs6802945          | 90270589  | A     | G   | 1.708952710959944e-12  | 7.0563806639797235 | 31957.0 |
| 3 | rs556500778        | 17720571  | GA    | G   | 1.760832064967557e-12  | 7.052221812364813  | 31454.0 |
| 3 | rs9819028          | 147219323 | G     | A   | 1.8265461440229507e-12 | 7.047123182520893  | 31421.0 |
| 3 | rs7617683          | 17728919  | T     | C   | 1.8653144782180828e-12 | 7.0441989657435835 | 31881.0 |
| 3 | rs35423549         | 17739615  | T     | C   | 1.8681049163922254e-12 | 7.043990794629867  | 31850.0 |
| 3 | rs6803312          | 17771005  | T     | C   | 1.890136975972773e-12  | 7.042357799922111  | 31846.0 |

|   |             |          |        |     |                        |                    |         |
|---|-------------|----------|--------|-----|------------------------|--------------------|---------|
| 3 | rs113165984 | 89989689 | T      | C   | 1.8944097059398822e-12 | 7.042043272121112  | 30928.0 |
| 3 | rs4908966   | 17773919 | A      | G   | 1.909539316601717e-12  | 7.0409351059565175 | 31838.0 |
| 3 | rs7431897   | 17762335 | G      | T   | 1.935316599957125e-12  | 7.0390667417514905 | 31885.0 |
| 3 | rs7652156   | 17780490 | C      | G   | 2.0115942432398438e-12 | 7.033677748388014  | 31843.0 |
| 3 | rs11929111  | 17777546 | A      | G   | 2.022007160615868e-12  | 7.0329576768375714 | 31844.0 |
| 3 | rs6577644   | 17766733 | A      | G   | 2.0998399577532326e-12 | 7.027687856842192  | 31848.0 |
| 3 | rs6577643   | 17766697 | C      | G   | 2.1073021945322184e-12 | 7.0271927177473446 | 31847.0 |
| 3 | rs9880456   | 17777123 | A      | G   | 2.1526638426927968e-12 | 7.024219359353872  | 31847.0 |
| 3 | rs10689924  | 17696951 | T      | TTA | 2.1639893063691348e-12 | 7.023486588274659  | 32018.0 |
| 3 | rs4482690   | 17767046 | T      | A   | 2.20612838985696e-12   | 7.0207927846632945 | 31850.0 |
| 3 | rs34990533  | 17718227 | T      | C   | 2.214816467403188e-12  | 7.020243665938968  | 31761.0 |
| 3 | rs79003773  | 90348777 | T      | G   | 2.221167641618076e-12  | 7.0198435832888855 | 31446.0 |
| 3 | rs12632570  | 17763501 | A      | C   | 2.304114648535416e-12  | 7.014719057717426  | 31845.0 |
| 3 | rs57309958  | 17732035 | T      | G   | 2.3468230580647905e-12 | 7.012150647658568  | 31858.0 |
| 3 | rs9681232   | 17760883 | A      | G   | 2.3506260322643044e-12 | 7.011924170709113  | 31888.0 |
| 3 | rs11128839  | 17703391 | C      | T   | 2.351323276438534e-12  | 7.011882687001928  | 31932.0 |
| 3 | rs4909012   | 17756467 | C      | A   | 2.361352221301839e-12  | 7.011287329322928  | 31896.0 |
| 3 | rs4909010   | 17736023 | G      | A   | 2.3616550670433108e-12 | 7.011269389806065  | 31893.0 |
| 3 | rs4908959   | 17736035 | G      | A   | 2.3616550670433108e-12 | 7.011269389806065  | 31893.0 |
| 3 | rs12497320  | 17754558 | G      | A   | 2.373324845097752e-12  | 7.0105798262162775 | 31890.0 |
| 3 | rs6810235   | 17753801 | C      | A   | 2.383427441572933e-12  | 7.009985547191025  | 31890.0 |
| 3 | rs61081795  | 17709275 | T      | C   | 2.397738599300175e-12  | 7.009147917180012  | 31933.0 |
| 3 | rs4513482   | 17708780 | C      | T   | 2.401854078446696e-12  | 7.008907946453973  | 31933.0 |
| 3 | rs4243835   | 17706179 | A      | G   | 2.402835900039937e-12  | 7.008850756701626  | 31934.0 |
| 3 | rs4243836   | 17706261 | C      | T   | 2.402835900039937e-12  | 7.008850756701626  | 31934.0 |
| 3 | rs7632240   | 17711352 | C      | A   | 2.412482636786042e-12  | 7.008290063331605  | 31922.0 |
| 3 | rs4566567   | 17749177 | C      | T   | 2.418114650889453e-12  | 7.007963731833024  | 31898.0 |
| 3 | rs4568172   | 17749661 | A      | G   | 2.418114650889453e-12  | 7.007963731833024  | 31898.0 |
| 3 | rs35642812  | 17741409 | C      | G   | 2.4621218442585295e-12 | 7.0054392308914375 | 31893.0 |
| 3 | rs199634373 | 17741172 | A      | AC  | 2.484093018765783e-12  | 7.004195356346671  | 31850.0 |
| 3 | rs7633601   | 17734215 | T      | C   | 2.4877172135095427e-12 | 7.003991213714072  | 31904.0 |
| 3 | rs4589965   | 17709985 | C      | T   | 2.4987612866898425e-12 | 7.0033709201172725 | 31937.0 |
| 3 | rs10510477  | 17721297 | T      | C   | 2.5279906791613894e-12 | 7.001742128081176  | 31891.0 |
| 3 | rs6577622   | 17724339 | T      | C   | 2.545156197569473e-12  | 7.0007941757539545 | 31893.0 |
| 3 | rs11128843  | 17736281 | C      | T   | 2.5840509709595368e-12 | 6.99866923681335   | 31853.0 |
| 3 | rs12632939  | 17741107 | C      | A   | 2.5840509709595368e-12 | 6.99866923681335   | 31853.0 |
| 3 | rs7630695   | 17726483 | A      | G   | 2.594998193360649e-12  | 6.998076812530364  | 31897.0 |
| 3 | rs4908958   | 17728043 | G      | A   | 2.596245092785621e-12  | 6.99800949036788   | 31898.0 |
| 3 | rs34297417  | 17728287 | T      | C   | 2.596245092785621e-12  | 6.99800949036788   | 31898.0 |
| 3 | rs4128509   | 17731099 | T      | C   | 2.596245092785621e-12  | 6.99800949036788   | 31898.0 |
| 3 | rs12487916  | 17733795 | G      | C   | 2.596245092785621e-12  | 6.99800949036788   | 31898.0 |
| 3 | rs13071934  | 17757928 | G      | C   | 2.59792934643583e-12   | 6.997918605053169  | 31887.0 |
| 3 | rs4908964   | 17758859 | C      | T   | 2.59792934643583e-12   | 6.997918605053169  | 31887.0 |
| 3 | rs11128844  | 17736387 | C      | T   | 2.611567756004917e-12  | 6.997184773649369  | 31896.0 |
| 3 | rs4243838   | 17759733 | T      | C   | 2.6168836895469927e-12 | 6.996899760807812  | 31894.0 |
| 3 | rs6809062   | 17711772 | G      | A   | 2.639479772359708e-12  | 6.9956945783870985 | 31933.0 |
| 3 | rs6797952   | 17735318 | A      | G   | 2.642502887043374e-12  | 6.995534105800493  | 31901.0 |
| 3 | rs763203017 | 17688987 | TAAGAA | T   | 2.6448942023750945e-12 | 6.99540729778978   | 32011.0 |
| 3 | rs8179983   | 17764309 | C      | T   | 2.6468850677449966e-12 | 6.995301810806179  | 31892.0 |
| 3 | rs34487714  | 17763899 | T      | C   | 2.6560323793145802e-12 | 6.994818133928543  | 31893.0 |
| 3 | rs11128841  | 17721451 | C      | T   | 2.705528724414522e-12  | 6.992228953309332  | 31892.0 |
| 3 | rs4602424   | 17722619 | A      | T   | 2.705528724414522e-12  | 6.992228953309332  | 31892.0 |
| 3 | rs13085167  | 17717405 | C      | T   | 2.709320310619848e-12  | 6.992032533145214  | 31897.0 |
| 3 | rs35697509  | 17763957 | G      | T   | 2.7721460606280917e-12 | 6.988816552683426  | 31893.0 |

|   |                    |          |       |    |                        |                    |         |
|---|--------------------|----------|-------|----|------------------------|--------------------|---------|
| 3 | rs9816920          | 17739024 | A     | C  | 2.8477768888937683e-12 | 6.985038592487374  | 31898.0 |
| 3 | rs11712168         | 17736700 | G     | C  | 2.851514577062112e-12  | 6.984854445981207  | 31858.0 |
| 3 | rs4909009          | 17720104 | C     | A  | 2.8518566807052323e-12 | 6.984837603219857  | 31892.0 |
| 3 | rs6577616          | 17715524 | C     | T  | 2.8743415464246065e-12 | 6.9837349298245455 | 31928.0 |
| 3 | rs13097908         | 17719764 | A     | G  | 2.9077699423113257e-12 | 6.982111115868727  | 31896.0 |
| 3 | rs13065637         | 17710414 | T     | C  | 2.9110733219957922e-12 | 6.9819516463721705 | 31930.0 |
| 3 | rs11927637         | 17781315 | A     | G  | 2.923272014544493e-12  | 6.981364292428776  | 31840.0 |
| 3 | rs11719266         | 17781576 | A     | G  | 2.9397957471945867e-12 | 6.980572513770193  | 31839.0 |
| 3 | rs7622878          | 17738416 | C     | T  | 2.9534353141073288e-12 | 6.979922218694592  | 31893.0 |
| 3 | rs6795189          | 17711724 | T     | A  | 2.9989462960844103e-12 | 6.9777734963060185 | 31931.0 |
| 3 | 3:17758810_CTTTA_C | 17758810 | CTTTA | C  | 3.18952794393819e-12   | 6.969109760175615  | 31795.0 |
| 3 | 3:89357752_AT_A    | 89357752 | AT    | A  | 3.2073589858498615e-12 | 6.968325314580415  | 24303.0 |
| 3 | rs11386338         | 17676494 | C     | CA | 3.3371221038424933e-12 | 6.962742185695863  | 32008.0 |
| 3 | 3:17761502_TAA_T   | 17761502 | TAA   | T  | 3.3504953358339763e-12 | 6.962178944164588  | 31835.0 |
| 3 | rs62275606         | 90355890 | A     | G  | 3.363706721928822e-12  | 6.961624679466237  | 31668.0 |
| 3 | rs555285785        | 17745398 | T     | G  | 3.5194864238576627e-12 | 6.955245483487438  | 31822.0 |
| 3 | rs373576726        | 17745406 | GT    | G  | 3.5194864238576627e-12 | 6.955245483487438  | 31822.0 |
| 3 | rs4484221          | 17702593 | C     | G  | 3.53888525397634e-12   | 6.954470561666048  | 31946.0 |
| 3 | rs12488591         | 17795931 | T     | C  | 3.653202940045209e-12  | 6.949986838215603  | 31718.0 |
| 3 | rs4908972          | 17796192 | T     | C  | 3.653202940045209e-12  | 6.949986838215603  | 31718.0 |
| 3 | rs13064990         | 17696489 | A     | G  | 3.8332351814758496e-12 | 6.943197278877039  | 31691.0 |
| 3 | 3:90299284_CAT_C   | 90299284 | CAT   | C  | 4.055873215682047e-12  | 6.935220749547025  | 32003.0 |
| 3 | rs4908939          | 17793850 | G     | A  | 4.0920831680837146e-12 | 6.9339641774377325 | 31711.0 |
| 3 | rs6789697          | 17700708 | G     | A  | 4.175326011720528e-12  | 6.931116301074304  | 31999.0 |
| 3 | rs9867064          | 17792574 | C     | T  | 4.359820472076567e-12  | 6.924997881050645  | 31714.0 |
| 3 | rs4435674          | 17794200 | C     | T  | 4.396610975366511e-12  | 6.923808199165312  | 31715.0 |
| 3 | rs4566568          | 17798924 | A     | G  | 4.435578236675783e-12  | 6.922558723937961  | 31715.0 |
| 3 | rs73151380         | 90000532 | A     | T  | 4.6644706576945485e-12 | 6.915429774991282  | 31156.0 |
| 3 | rs6809775          | 17802881 | T     | C  | 4.7202090346207644e-12 | 6.913745735241778  | 31712.0 |
| 3 | rs7647914          | 17742786 | A     | G  | 4.733587530132952e-12  | 6.913344428287775  | 31849.0 |
| 3 | rs9868785          | 90066423 | G     | A  | 4.778048524979328e-12  | 6.912018699552486  | 31909.0 |
| 3 | rs4444738          | 17742738 | A     | G  | 4.8959920673787646e-12 | 6.908559624813582  | 31843.0 |
| 3 | rs13061771         | 17743799 | C     | T  | 4.8959920673787646e-12 | 6.908559624813582  | 31843.0 |
| 3 | rs11128848         | 17744210 | A     | G  | 4.8959920673787646e-12 | 6.908559624813582  | 31843.0 |
| 3 | rs4908973          | 17800423 | T     | C  | 4.949623205302797e-12  | 6.90701365173695   | 31714.0 |
| 3 | rs7609916          | 17804464 | A     | G  | 4.961002241989991e-12  | 6.906687751474344  | 31716.0 |
| 3 | rs34485427         | 17694291 | C     | A  | 5.074732058971656e-12  | 6.903470159008832  | 32013.0 |
| 3 | rs1464463          | 90056380 | G     | A  | 5.0889816608216386e-12 | 6.903072008537888  | 31940.0 |
| 3 | rs13317478         | 17464862 | T     | C  | 5.242404381643454e-12  | 6.8988531071274055 | 32037.0 |
| 3 | rs4908940          | 17797271 | A     | C  | 5.2715815546688474e-12 | 6.898064492419145  | 31717.0 |
| 3 | rs12487248         | 17697696 | C     | T  | 5.2727117825146296e-12 | 6.8980340302193035 | 32005.0 |
| 3 | rs62277724         | 90281205 | G     | A  | 5.49922756875775e-12   | 6.892054551300879  | 32050.0 |
| 3 | rs4908992          | 17693974 | A     | G  | 5.631568925574133e-12  | 6.888671814473199  | 32014.0 |
| 3 | rs13096559         | 17694643 | G     | T  | 5.631568925574133e-12  | 6.888671814473199  | 32014.0 |
| 3 | rs6796448          | 17801811 | C     | T  | 5.68439905234404e-12   | 6.88734315305969   | 31713.0 |
| 3 | rs7647928          | 17742839 | A     | G  | 5.9753278771336245e-12 | 6.880236492606926  | 31847.0 |
| 3 | rs4396913          | 90047036 | T     | C  | 6.0232202310429865e-12 | 6.879099213694418  | 31937.0 |
| 3 | rs283917           | 17328509 | A     | G  | 6.052223819418952e-12  | 6.8784147791061425 | 32045.0 |
| 3 | rs73143703         | 90281792 | C     | T  | 6.159462747593839e-12  | 6.875911742275027  | 32090.0 |
| 3 | rs55701200         | 17690427 | C     | T  | 6.251961412698973e-12  | 6.873786826666192  | 32015.0 |
| 3 | rs7427588          | 17806424 | A     | G  | 6.3273081710072575e-12 | 6.872078580023108  | 31708.0 |
| 3 | rs6768666          | 17692937 | T     | C  | 6.647816578809861e-12  | 6.865028100723753  | 31997.0 |
| 3 | rs11426295         | 17757500 | T     | TG | 6.961950781984316e-12  | 6.8584339476238885 | 31787.0 |
| 3 | rs6551450          | 90129328 | A     | C  | 7.404977784896984e-12  | 6.849613500826952  | 32019.0 |

|   |                         |           |            |      |                        |                    |         |
|---|-------------------------|-----------|------------|------|------------------------|--------------------|---------|
| 3 | rs1128837               | 17697175  | T          | C    | 7.574146631497768e-12  | 6.846381240893978  | 32009.0 |
| 3 | rs6792422               | 17701005  | G          | T    | 7.68104337592372e-12   | 6.844375071837683  | 32002.0 |
| 3 | rs754076021             | 17698320  | AAT        | A    | 8.390732971745232e-12  | 6.831711734561948  | 31886.0 |
| 3 | rs283926                | 17357820  | G          | A    | 8.560881359320345e-12  | 6.8288319026073205 | 32040.0 |
| 3 | rs9824116               | 90319290  | A          | G    | 8.687141991052624e-12  | 6.826730910655702  | 31653.0 |
| 3 | rs6768637               | 17692849  | T          | C    | 8.873230839460203e-12  | 6.823688287785388  | 32014.0 |
| 3 | rs9864344               | 90121955  | T          | G    | 8.966119244884789e-12  | 6.822192842814637  | 32009.0 |
| 3 | rs9847461               | 17607956  | C          | G    | 8.968948986827473e-12  | 6.822147524373449  | 31755.0 |
| 3 | rs9851877               | 90258929  | G          | A    | 8.980205935606082e-12  | 6.821967382448863  | 32049.0 |
| 3 | rs13071728              | 17690673  | A          | C    | 9.011572204724779e-12  | 6.8214666011474785 | 32017.0 |
| 3 | rs9881089               | 17624602  | C          | A    | 9.129622352589657e-12  | 6.819597046393375  | 31980.0 |
| 3 | rs5014632               | 17695082  | A          | G    | 9.409487295378278e-12  | 6.8152578028134805 | 32017.0 |
| 3 | rs57107595              | 17706556  | G          | GA   | 9.893030981062307e-12  | 6.808050253900029  | 31277.0 |
| 3 | rs9857910               | 17697786  | A          | T    | 9.916208953112847e-12  | 6.807713498964951  | 32007.0 |
| 3 | rs137965771             | 90386418  | C          | A    | 9.99180997743898e-12   | 6.806620419600885  | 31241.0 |
| 3 | rs11397577              | 90081678  | A          | AT   | 1.0051734312568243e-11 | 6.805759743267554  | 31643.0 |
| 3 | rs4470554               | 17671037  | T          | C    | 1.0165761288485024e-11 | 6.8041357998555485 | 32020.0 |
| 3 | rs9880971               | 17624579  | C          | A    | 1.0415935494109378e-11 | 6.800634527033478  | 31980.0 |
| 3 | rs283939                | 17343995  | T          | C    | 1.103371952287868e-11  | 6.7923294824508265 | 32059.0 |
| 3 | rs17273020              | 17415705  | C          | T    | 1.1072421490980412e-11 | 6.791824476437116  | 32133.0 |
| 3 | rs9843225               | 17527551  | T          | C    | 1.1480787335145779e-11 | 6.786598823299585  | 31832.0 |
| 3 | rs7372028               | 90294773  | G          | T    | 1.153899133211317e-11  | 6.785868882454113  | 31784.0 |
| 3 | rs146780908             | 17704760  | T          | AAAT | 1.1695201280349536e-11 | 6.783927527970923  | 31638.0 |
| 3 | rs9821955               | 17650745  | A          | GG   | 1.1888215159119055e-11 | 6.7815635626716055 | 31993.0 |
| 3 | rs6779834               | 17668766  | G          | A    | 1.1985521488861453e-11 | 6.780386006566283  | 32007.0 |
| 3 | rs113450730             | 90135516  | T          | G    | 1.2460849968489966e-11 | 6.774765158393402  | 32031.0 |
| 3 | rs2733481               | 17320397  | G          | A    | 1.2519235942139481e-11 | 6.774089267018537  | 32186.0 |
| 3 | rs11435463              | 90122867  | A          | AT   | 1.2691133957532184e-11 | 6.772117110282802  | 31789.0 |
| 3 | rs4908987               | 17688490  | T          | C    | 1.2732371032448164e-11 | 6.771647896190382  | 31998.0 |
| 3 | rs9681617               | 17655388  | T          | C    | 1.2790707050047855e-11 | 6.770986658587939  | 31990.0 |
| 3 | rs9877921               | 90108491  | C          | T    | 1.2928665012122016e-11 | 6.769434586777487  | 32045.0 |
| 3 | 3:90306556_GC_G         | 90306556  | GC         | G    | 1.3253358594725208e-11 | 6.765844768794855  | 32020.0 |
| 3 | 3:89312113_CTTTTTTTTT_C | 89312113  | CTTTTTTTTT | C    | 1.3331935447788465e-11 | 6.7649889710855815 | 30681.0 |
| 3 | rs12714734              | 90107488  | A          | C    | 1.3574377814650967e-11 | 6.762379276954781  | 32019.0 |
| 3 | rs9853571               | 17640071  | T          | C    | 1.379527753197024e-11  | 6.760040916864492  | 31990.0 |
| 3 | rs924762                | 147223899 | C          | T    | 1.3976457574959524e-11 | 6.7581502278723695 | 31404.0 |
| 3 | 3:17663199_CT_C         | 17663199  | CT         | C    | 1.7034474248273265e-11 | 6.729416554789053  | 30598.0 |
| 3 | rs7429932               | 90283951  | A          | G    | 1.7219558707937205e-11 | 6.7278438293478136 | 32047.0 |
| 3 | rs71105145              | 90176889  | T          | TA   | 1.7441798633384762e-11 | 6.725977108037249  | 31684.0 |
| 3 | rs9816940               | 90146579  | C          | T    | 1.8316989979939764e-11 | 6.718845574747562  | 32118.0 |
| 3 | rs75980247              | 17740272  | G          | A    | 1.9228896373012745e-11 | 6.711761383019455  | 31398.0 |
| 3 | rs141333755             | 90185094  | C          | CA   | 1.9241220694527848e-11 | 6.711667911487239  | 32066.0 |
| 3 | rs5846968               | 17796108  | G          | T    | 1.9628853249251715e-11 | 6.70875751335181   | 29246.0 |
| 3 | rs9875185               | 90394152  | A          | G    | 1.964250464264342e-11  | 6.7086560456620905 | 31262.0 |
| 3 | rs60759458              | 90045885  | G          | C    | 1.985507106528537e-11  | 6.707084933923726  | 31846.0 |
| 3 | rs283923                | 17325703  | A          | G    | 2.0031544315681183e-11 | 6.705793053980978  | 32136.0 |
| 3 | rs9857243               | 90395814  | A          | GG   | 2.051737918191796e-11  | 6.702293226047133  | 31222.0 |
| 3 | rs9837548               | 90156142  | C          | T    | 2.0642054178261244e-11 | 6.701408183394675  | 32138.0 |
| 3 | rs283907                | 17336419  | T          | C    | 2.1194869900242616e-11 | 6.697545879302278  | 32119.0 |
| 3 | rs283909                | 17333068  | A          | G    | 2.175380812159352e-11  | 6.693739801336408  | 32112.0 |
| 3 | rs73143764              | 90405465  | G          | C    | 2.3111244716020672e-11 | 6.684880949360141  | 30977.0 |
| 3 | rs283919                | 17328070  | G          | C    | 2.322520095726821e-11  | 6.684160591538907  | 32088.0 |
| 3 | rs283921                | 17325889  | G          | A    | 2.375832435869218e-11  | 6.680835842284638  | 32129.0 |
| 3 | rs7433265               | 90275692  | A          | G    | 2.375850949566848e-11  | 6.6808347004387425 | 32038.0 |

|   |                     |          |        |   |                        |                    |         |
|---|---------------------|----------|--------|---|------------------------|--------------------|---------|
| 3 | rs6763681           | 17409517 | G      | A | 2.3905586058517858e-11 | 6.6799303358274535 | 32034.0 |
| 3 | rs2470349           | 17304712 | G      | A | 2.4290084774249862e-11 | 6.677591566949777  | 31544.0 |
| 3 | rs76900983          | 90363402 | C      | A | 2.4611963086865608e-11 | 6.675661397826332  | 31268.0 |
| 3 | rs2596678           | 17320600 | T      | C | 2.4695300093957433e-11 | 6.675165687980456  | 32134.0 |
| 3 | rs2596681           | 17320850 | T      | A | 2.4849840762344805e-11 | 6.674250759206821  | 32059.0 |
| 3 | rs283915            | 17329768 | T      | C | 2.6021794248527122e-11 | 6.6674884444057385 | 32107.0 |
| 3 | rs7433880           | 90174960 | C      | A | 2.605949271846171e-11  | 6.667275902862492  | 32173.0 |
| 3 | rs283916            | 17329413 | A      | G | 2.610049512862385e-11  | 6.667045075343088  | 32106.0 |
| 3 | rs2470347           | 17313703 | T      | A | 2.6388068218399025e-11 | 6.665436057033777  | 32077.0 |
| 3 | rs283908            | 17334741 | T      | C | 2.6551819833526336e-11 | 6.664527492617422  | 32115.0 |
| 3 | rs9815264           | 90276511 | G      | A | 2.68407497294016e-11   | 6.66293768066142   | 32056.0 |
| 3 | rs9815542           | 90276661 | G      | A | 2.68407497294016e-11   | 6.66293768066142   | 32056.0 |
| 3 | rs283922            | 17325841 | T      | C | 2.7065534177050327e-11 | 6.661712367054516  | 32129.0 |
| 3 | rs1840943           | 90460310 | T      | A | 2.764769483309361e-11  | 6.658584697266695  | 31451.0 |
| 3 | rs73153370          | 90056125 | T      | A | 2.791038350528269e-11  | 6.657194447939745  | 31839.0 |
| 3 | rs10049142          | 17387061 | A      | G | 2.8134816986677296e-11 | 6.656016768164017  | 32083.0 |
| 3 | rs2596679           | 17320788 | T      | C | 2.822618555432561e-11  | 6.655539957522713  | 32139.0 |
| 3 | 3:17807171_CAAAAA_C | 17807171 | CAAAAA | C | 2.867227950450393e-11  | 6.653233479894247  | 31500.0 |
| 3 | rs10049143          | 17387080 | A      | C | 2.8972933195137268e-11 | 6.651698714317143  | 32082.0 |
| 3 | rs10433560          | 17803974 | C      | T | 2.909320473836321e-11  | 6.6510891177300175 | 31248.0 |
| 3 | rs9857806           | 90189355 | G      | A | 2.94984436179467e-11   | 6.6490531676246025 | 32168.0 |
| 3 | rs2733523           | 17322432 | G      | A | 2.9840780533051234e-11 | 6.647354460573151  | 32142.0 |
| 3 | rs149460172         | 90408448 | T      | G | 3.009595324679452e-11  | 6.646100632197946  | 30985.0 |
| 3 | rs6577618           | 17715648 | A      | T | 3.0157270777768555e-11 | 6.645800890258384  | 31747.0 |
| 3 | rs17043492          | 17402565 | T      | C | 3.0273455487688325e-11 | 6.645234570341692  | 32125.0 |
| 3 | rs2470577           | 17313311 | A      | G | 3.048157134471134e-11  | 6.644225447197192  | 32078.0 |
| 3 | rs7432427           | 90299370 | A      | T | 3.064798511710054e-11  | 6.643423371457423  | 31947.0 |
| 3 | rs4312680           | 17788430 | G      | A | 3.096426462281933e-11  | 6.641910658054526  | 31726.0 |
| 3 | rs17043494          | 17402806 | T      | C | 3.127235029439718e-11  | 6.640451604868798  | 32122.0 |
| 3 | rs6785870           | 17387479 | T      | C | 3.174126815864995e-11  | 6.638257653565363  | 32100.0 |
| 3 | rs2733479           | 17320931 | G      | T | 3.177578420590788e-11  | 6.638097417150288  | 32135.0 |
| 3 | 3:17392222_AG_A     | 17392222 | AG     | A | 3.1908026379740784e-11 | 6.6374850720345    | 32120.0 |
| 3 | rs2733487           | 17315969 | A      | C | 3.1911741920947105e-11 | 6.637467903180543  | 32132.0 |
| 3 | rs79430269          | 90403309 | G      | A | 3.216789963608309e-11  | 6.636288936156372  | 31514.0 |
| 3 | 3:90392328_CTAGA_C  | 90392328 | CTAGA  | C | 3.235795806331464e-11  | 6.635420114098173  | 31487.0 |
| 3 | rs12638179          | 90456907 | C      | G | 3.2859504406008797e-11 | 6.633151135222247  | 30949.0 |
| 3 | rs2733524           | 17322397 | G      | T | 3.295500207709091e-11  | 6.6327229508169925 | 32123.0 |
| 3 | rs283906            | 17337410 | C      | A | 3.339928185933326e-11  | 6.63074675964393   | 32112.0 |
| 3 | rs9857738           | 90431024 | A      | G | 3.4547255327156096e-11 | 6.625757231106981  | 31036.0 |
| 3 | rs9856356           | 90406018 | A      | G | 3.457995381332456e-11  | 6.625617499876428  | 30958.0 |
| 3 | rs283913            | 17330957 | A      | C | 3.50936957897676e-11   | 6.623438927192893  | 32119.0 |
| 3 | rs2733485           | 17318438 | A      | C | 3.5339957281176577e-11 | 6.622405674092777  | 32134.0 |
| 3 | rs283925            | 17325403 | C      | G | 3.54324009761069e-11   | 6.622019620894389  | 32140.0 |
| 3 | rs2733514           | 17323931 | T      | C | 3.5716148917956886e-11 | 6.620840790147581  | 32138.0 |
| 3 | rs2596674           | 17315986 | C      | T | 3.5999348741899645e-11 | 6.6196733396057175 | 32137.0 |
| 3 | rs283912            | 17331582 | A      | T | 3.656929522077085e-11  | 6.61735081650173   | 32121.0 |
| 3 | rs7426793           | 90251951 | C      | A | 3.721093387522339e-11  | 6.6147781615916985 | 32043.0 |
| 3 | rs2596675           | 17316259 | C      | G | 3.746343295219191e-11  | 6.613777649308427  | 32133.0 |
| 3 | rs283947            | 17354812 | G      | A | 3.8045340154371094e-11 | 6.611496778225224  | 32170.0 |
| 3 | rs9820410           | 90431093 | G      | A | 3.838508051244863e-11  | 6.6101808480995174 | 31045.0 |
| 3 | rs62277418          | 90431424 | C      | A | 3.838508051244863e-11  | 6.6101808480995174 | 31045.0 |
| 3 | rs75342952          | 17386077 | C      | T | 3.902549846497424e-11  | 6.6077309908659885 | 32114.0 |
| 3 | rs283949            | 17355801 | G      | C | 3.9229054402710186e-11 | 6.606960541187829  | 32139.0 |
| 3 | rs4908970           | 17788866 | A      | G | 3.931509127736396e-11  | 6.606636071137466  | 31731.0 |

|   |                 |          |     |           |                        |                    |         |
|---|-----------------|----------|-----|-----------|------------------------|--------------------|---------|
| 3 | rs28808578      | 90335353 | G   | A         | 3.945564206458915e-11  | 6.606107504958096  | 31808.0 |
| 3 | rs283935        | 17367357 | A   | T         | 3.966785890452737e-11  | 6.605312906710787  | 32128.0 |
| 3 | rs71266497      | 17333904 | C   | CTTG<br>A | 3.9677685395959016e-11 | 6.605276214460268  | 32035.0 |
| 3 | rs4908938       | 17787557 | G   | A         | 3.985713286256979e-11  | 6.604607714458687  | 31745.0 |
| 3 | rs4488868       | 17771429 | T   | C         | 4.04672520493996e-11   | 6.60235664813253   | 31846.0 |
| 3 | rs9682382       | 90342103 | C   | A         | 4.060840955115057e-11  | 6.601840571961873  | 31779.0 |
| 3 | rs4908971       | 17789074 | T   | C         | 4.1498024314096404e-11 | 6.598627952584303  | 31741.0 |
| 3 | rs35500376      | 17601086 | A   | AT        | 4.154041946158659e-11  | 6.598476540484098  | 30588.0 |
| 3 | rs2060625       | 17339152 | G   | T         | 4.1887601881058506e-11 | 6.597242255058798  | 32123.0 |
| 3 | rs283911        | 17331704 | C   | T         | 4.2026169927163466e-11 | 6.596752417643219  | 32123.0 |
| 3 | rs9714360       | 90357513 | G   | T         | 4.2157690476030006e-11 | 6.59628895266878   | 31557.0 |
| 3 | rs144184070     | 90358160 | G   | A         | 4.2270979048824655e-11 | 6.595890868049959  | 31568.0 |
| 3 | rs9713426       | 90338187 | C   | T         | 4.3053807824005735e-11 | 6.593168284471479  | 31805.0 |
| 3 | rs283938        | 17343457 | T   | C         | 4.325566879071583e-11  | 6.592474091867447  | 32149.0 |
| 3 | rs2060627       | 17339381 | C   | G         | 4.340977450614585e-11  | 6.5919462581266695 | 32122.0 |
| 3 | rs5023579       | 17788324 | A   | T         | 4.436607595809167e-11  | 6.588711217906033  | 29805.0 |
| 3 | rs13318609      | 17395320 | T   | C         | 4.4848352145487115e-11 | 6.587105532012856  | 32138.0 |
| 3 | rs6551451       | 90156286 | C   | T         | 4.505503036459839e-11  | 6.586422584398056  | 32133.0 |
| 3 | rs12488093      | 17388506 | T   | C         | 4.5184375657491726e-11 | 6.585996733385879  | 32141.0 |
| 3 | rs11374153      | 17779317 | C   | CA        | 4.543082592639431e-11  | 6.585188621885175  | 29799.0 |
| 3 | rs9810980       | 90349804 | T   | C         | 4.5446273026969496e-11 | 6.585138113714327  | 31513.0 |
| 3 | rs2733478       | 17321551 | A   | G         | 4.572838801086521e-11  | 6.584218610699789  | 32140.0 |
| 3 | rs283948        | 17355617 | C   | G         | 4.6465835120943494e-11 | 6.581841001725683  | 32138.0 |
| 3 | 3:90308526_TA_T | 90308526 | TA  | T         | 4.6534794366754424e-11 | 6.581620560489414  | 30577.0 |
| 3 | rs2596640       | 17288440 | A   | G         | 4.70483132025095e-11   | 6.579988981954751  | 32055.0 |
| 3 | rs2060624       | 17338719 | C   | T         | 4.759166941306228e-11  | 6.578281464810266  | 32123.0 |
| 3 | rs7429720       | 90228124 | T   | G         | 4.806174431102522e-11  | 6.576819554712597  | 32107.0 |
| 3 | rs283931        | 17361581 | T   | C         | 4.8327028800041327e-11 | 6.576000695476942  | 32146.0 |
| 3 | rs2470580       | 17367746 | T   | C         | 4.8327028800041327e-11 | 6.576000695476942  | 32146.0 |
| 3 | rs17043422      | 17383881 | C   | T         | 4.83594974441569e-11   | 6.575900776026603  | 32146.0 |
| 3 | rs761041249     | 17714993 | AGT | A         | 4.851317501382226e-11  | 6.575428735276426  | 31791.0 |
| 3 | rs34502358      | 17377815 | T   | C         | 4.8738387278214067e-11 | 6.574739602508626  | 32125.0 |
| 3 | rs28408438      | 17384023 | T   | C         | 4.8776022803848926e-11 | 6.574624744487263  | 32145.0 |
| 3 | rs28454413      | 17383964 | C   | T         | 4.904708914257682e-11  | 6.573800042412517  | 32145.0 |
| 3 | rs767685        | 17324733 | A   | G         | 4.925991707191575e-11  | 6.573155645883522  | 32144.0 |
| 3 | rs4582042       | 17421879 | C   | T         | 4.9661859156779535e-11 | 6.571946047980727  | 32171.0 |
| 3 | rs2596677       | 17318844 | T   | C         | 5.087620877587458e-11  | 6.568348938985747  | 32141.0 |
| 3 | rs13095571      | 17532320 | T   | C         | 5.120063430222194e-11  | 6.5674021516154735 | 31885.0 |
| 3 | rs9877959       | 90263752 | C   | A         | 5.143973683473012e-11  | 6.5667081157068266 | 32014.0 |
| 3 | rs2596638       | 17287018 | C   | T         | 5.2303853511152606e-11 | 6.564225914395305  | 32056.0 |
| 3 | rs2596639       | 17287135 | G   | A         | 5.2303853511152606e-11 | 6.564225914395305  | 32056.0 |
| 3 | rs2733488       | 17315496 | T   | C         | 5.233774575827299e-11  | 6.564129377441825  | 32116.0 |
| 3 | rs12637691      | 90355883 | C   | G         | 5.294131827617789e-11  | 6.56242035795571   | 31644.0 |
| 3 | rs6802891       | 17297337 | T   | C         | 5.337246668791118e-11  | 6.561211189167997  | 31976.0 |
| 3 | rs147324072     | 17718175 | C   | T         | 5.4454217061053323e-11 | 6.5582189524137675 | 31769.0 |
| 3 | rs2084572       | 17315758 | A   | G         | 5.478593708087261e-11  | 6.557313021771454  | 32135.0 |
| 3 | rs2596636       | 17283809 | T   | A         | 5.484212164033272e-11  | 6.5571601127443095 | 32059.0 |
| 3 | rs9798932       | 90461784 | G   | A         | 5.493645340118397e-11  | 6.556903728533144  | 31007.0 |
| 3 | rs2167118       | 17283278 | G   | A         | 5.53307308631461e-11   | 6.555836763153791  | 32060.0 |
| 3 | rs36172181      | 17719478 | G   | A         | 5.545280485236896e-11  | 6.5555079227327955 | 31901.0 |
| 3 | rs187303        | 17357075 | G   | A         | 5.554132480207315e-11  | 6.555269912113168  | 32139.0 |
| 3 | rs2470583       | 17280812 | G   | A         | 5.666161959575846e-11  | 6.5522893391934725 | 32058.0 |
| 3 | rs56399694      | 90361837 | G   | A         | 5.669436518259791e-11  | 6.552203088428433  | 31769.0 |
| 3 | rs13322641      | 17378509 | G   | A         | 5.7152567166866246e-11 | 6.551001284838223  | 32138.0 |

|   |                  |           |                |            |                        |                    |         |
|---|------------------|-----------|----------------|------------|------------------------|--------------------|---------|
| 3 | rs2596680        | 17320823  | C              | G          | 5.8082193903473704e-11 | 6.548591686069328  | 32103.0 |
| 3 | rs9849053        | 90152502  | G              | A          | 5.884024527573764e-11  | 6.5466545722031615 | 32103.0 |
| 3 | rs10470576       | 90154964  | C              | T          | 5.884024527573764e-11  | 6.5466545722031615 | 32103.0 |
| 3 | rs2596673        | 17270823  | A              | G          | 5.987155673754076e-11  | 6.544058006998358  | 31975.0 |
| 3 | rs4417835        | 147256611 | A              | G          | 5.997995691426401e-11  | 6.543787629794822  | 31617.0 |
| 3 | rs4908965        | 17768038  | T              | C          | 6.082980817290828e-11  | 6.541684301833628  | 31848.0 |
| 3 | rs2592099        | 17369313  | G              | T          | 6.101875790302335e-11  | 6.541220570144469  | 32145.0 |
| 3 | rs4908967        | 17774944  | C              | A          | 6.107466262370033e-11  | 6.5410836346842265 | 31837.0 |
| 3 | rs2733497        | 17280282  | C              | T          | 6.120828654130726e-11  | 6.540756826524771  | 32058.0 |
| 3 | rs2733501        | 17274801  | T              | C          | 6.146268317453347e-11  | 6.540136565167125  | 32049.0 |
| 3 | rs11927654       | 17723430  | G              | A          | 6.156634426825017e-11  | 6.539884541931246  | 31894.0 |
| 3 | rs62275565       | 90351548  | C              | G          | 6.230160927966493e-11  | 6.5381087714862485 | 31809.0 |
| 3 | rs1375817        | 17266023  | T              | C          | 6.259996445082675e-11  | 6.537394040679718  | 32050.0 |
| 3 | rs186005608      | 90483873  | C              | A          | 6.273977526423265e-11  | 6.537060259741365  | 31385.0 |
| 3 | rs9838264        | 90351314  | A              | T          | 6.303535103075735e-11  | 6.536356997602062  | 31797.0 |
| 3 | 3:17397140_AT_A  | 17397140  | AT             | A          | 6.334691587338075e-11  | 6.535619175911579  | 32087.0 |
| 3 | rs283937         | 17341329  | C              | T          | 6.342638568806846e-11  | 6.5354315502904425 | 32107.0 |
| 3 | rs7630286        | 17371566  | C              | T          | 6.345615120523385e-11  | 6.5353613340649455 | 32076.0 |
| 3 | rs7630433        | 17371582  | G              | C          | 6.345615120523385e-11  | 6.5353613340649455 | 32076.0 |
| 3 | rs12490933       | 17754925  | A              | G          | 6.35401544222618e-11   | 6.535163345857673  | 31887.0 |
| 3 | rs2596671        | 17266560  | T              | C          | 6.385663563347623e-11  | 6.534419719561633  | 32051.0 |
| 3 | rs2596647        | 17300133  | A              | C          | 6.397313349259684e-11  | 6.534146895410168  | 32043.0 |
| 3 | rs11128852       | 17776334  | T              | C          | 6.397411748835413e-11  | 6.5341445930790805 | 31847.0 |
| 3 | rs11128840       | 17704787  | C              | G          | 6.42823485775731e-11   | 6.5334251002074515 | 31935.0 |
| 3 | rs6806610        | 17705696  | G              | A          | 6.42823485775731e-11   | 6.5334251002074515 | 31935.0 |
| 3 | rs6780587        | 17709796  | C              | T          | 6.42823485775731e-11   | 6.5334251002074515 | 31935.0 |
| 3 | rs145367119      | 90049321  | C              | T          | 6.444667617972763e-11  | 6.533042893912648  | 29845.0 |
| 3 | 3:17343781_GTA_G | 17343781  | GTA            | G          | 6.445262348399996e-11  | 6.533029079075513  | 32154.0 |
| 3 | 3:17648762_CA_C  | 17648762  | CA             | C          | 6.506009982099186e-11  | 6.531624515366473  | 31927.0 |
| 3 | rs747681042      | 17375416  | AGGGAGAAT<br>G | A          | 6.517425288645024e-11  | 6.531362010991927  | 32109.0 |
| 3 | rs1545424        | 17266007  | T              | A          | 6.540818060143423e-11  | 6.530825476999426  | 32051.0 |
| 3 | rs34422952       | 17800933  | A              | AT<br>TAAA | 6.543131703920895e-11  | 6.530772513550287  | 29439.0 |
| 3 | rs374899793      | 17741045  | T              | TAAA<br>G  | 6.628847728675223e-11  | 6.528823120055892  | 25168.0 |
| 3 | rs34002492       | 17741698  | C              | G          | 6.69269033233655e-11   | 6.527387135401845  | 31893.0 |
| 3 | rs2596665        | 17259109  | A              | G          | 6.717322939085549e-11  | 6.526836663472451  | 32067.0 |
| 3 | rs283927         | 17358421  | G              | A          | 6.773880521008964e-11  | 6.525580188609568  | 32145.0 |
| 3 | rs11708672       | 17703137  | C              | T          | 6.795517262722006e-11  | 6.525102221458359  | 31935.0 |
| 3 | rs283928         | 17359316  | C              | T          | 6.809212171874403e-11  | 6.524800462174404  | 32145.0 |
| 3 | rs2348003        | 17292100  | T              | C          | 6.836105891443882e-11  | 6.524209598255785  | 32037.0 |
| 3 | rs2252237        | 17263417  | C              | T          | 6.900061119883254e-11  | 6.522813562096026  | 32057.0 |
| 3 | 3:17273959_GA_G  | 17273959  | GA             | G          | 6.967817147894517e-11  | 6.5213482989092775 | 31991.0 |
| 3 | rs13069155       | 17767422  | A              | G          | 6.970333243392485e-11  | 6.5212941556126784 | 31852.0 |
| 3 | rs2348002        | 17251689  | T              | C          | 6.97172551096506e-11   | 6.5212642039318975 | 32011.0 |
| 3 | rs13072194       | 90189970  | C              | T          | 6.984375567166853e-11  | 6.520992332552599  | 32169.0 |
| 3 | rs13353435       | 17430574  | T              | C          | 7.008882213371768e-11  | 6.520467010131734  | 32166.0 |
| 3 | rs4435673        | 17749125  | A              | G          | 7.010174383523746e-11  | 6.520439361159028  | 31897.0 |
| 3 | rs7636787        | 17433760  | G              | C          | 7.030233092570759e-11  | 6.520010796656934  | 32161.0 |
| 3 | rs2733500        | 17276149  | G              | A          | 7.03363573274781e-11   | 6.519938216175518  | 32058.0 |
| 3 | rs10433561       | 17803996  | T              | G          | 7.163266541177574e-11  | 6.517198377211733  | 31719.0 |
| 3 | rs2596667        | 17263274  | C              | T          | 7.170806126390438e-11  | 6.517040518455827  | 32056.0 |
| 3 | rs1449881        | 17286817  | T              | G          | 7.175543002799003e-11  | 6.51694142393168   | 32053.0 |
| 3 | rs7645459        | 17808236  | C              | G          | 7.200158211431801e-11  | 6.516427506378317  | 31716.0 |
| 3 | rs6551407        | 89270605  | C              | T          | 7.256822258213377e-11  | 6.5152509717672356 | 31912.0 |
| 3 | rs62275605       | 90354891  | C              | T          | 7.301416131376979e-11  | 6.514331354495455  | 31794.0 |

|   |                 |          |        |    |                       |                    |         |
|---|-----------------|----------|--------|----|-----------------------|--------------------|---------|
| 3 | rs773279507     | 17281259 | TG     | T  | 7.311848968747522e-11 | 6.5141170008672855 | 31978.0 |
| 3 | rs7651998       | 17711127 | G      | A  | 7.440650764623108e-11 | 6.511494996084712  | 31930.0 |
| 3 | rs8179891       | 17727378 | T      | G  | 7.464157496402109e-11 | 6.511021265731821  | 31897.0 |
| 3 | rs12634893      | 17729692 | T      | C  | 7.464157496402109e-11 | 6.511021265731821  | 31897.0 |
| 3 | rs10510478      | 17730282 | A      | G  | 7.464157496402109e-11 | 6.511021265731821  | 31897.0 |
| 3 | rs4408889       | 17730418 | T      | C  | 7.464157496402109e-11 | 6.511021265731821  | 31897.0 |
| 3 | rs56059241      | 17732173 | C      | A  | 7.464157496402109e-11 | 6.511021265731821  | 31897.0 |
| 3 | rs4243837       | 17733234 | G      | A  | 7.464157496402109e-11 | 6.511021265731821  | 31897.0 |
| 3 | rs6789467       | 17802134 | G      | C  | 7.468111055804245e-11 | 6.510941733137558  | 31719.0 |
| 3 | rs4611850       | 17798649 | T      | G  | 7.489748884749038e-11 | 6.510507179285071  | 31721.0 |
| 3 | rs9830414       | 90358707 | T      | C  | 7.515138454255336e-11 | 6.509998841715555  | 31683.0 |
| 3 | rs11128842      | 17735345 | G      | C  | 7.51738787137695e-11  | 6.509953886002097  | 31895.0 |
| 3 | rs35460334      | 17737277 | C      | T  | 7.51738787137695e-11  | 6.509953886002097  | 31895.0 |
| 3 | rs2198957       | 90355214 | G      | A  | 7.529049329414704e-11 | 6.50972103666537   | 31686.0 |
| 3 | rs752814983     | 17336486 | AAT    | A  | 7.539860739704535e-11 | 6.509505475438412  | 32037.0 |
| 3 | rs2596669       | 17265041 | C      | T  | 7.602659528592089e-11 | 6.50825931961228   | 32057.0 |
| 3 | rs4643736       | 17792256 | G      | T  | 7.613633591281728e-11 | 6.508042588060771  | 31722.0 |
| 3 | rs2733491       | 17308965 | G      | A  | 7.616379547054446e-11 | 6.507988404765503  | 32053.0 |
| 3 | rs11128849      | 17764670 | T      | C  | 7.623511906189814e-11 | 6.507847758004508  | 31891.0 |
| 3 | rs11128850      | 17764748 | A      | G  | 7.623511906189814e-11 | 6.507847758004508  | 31891.0 |
| 3 | rs1449879       | 17277391 | A      | G  | 7.62503276843369e-11  | 6.507817783962687  | 32056.0 |
| 3 | rs9682018       | 90364375 | G      | A  | 7.62983129427688e-11  | 6.507723250119509  | 31672.0 |
| 3 | rs4349529       | 17792118 | A      | G  | 7.636624539659218e-11 | 6.5075895184697545 | 31723.0 |
| 3 | rs35811992      | 17793235 | G      | A  | 7.636624539659218e-11 | 6.5075895184697545 | 31723.0 |
| 3 | rs728022        | 17305303 | G      | C  | 7.683342495234359e-11 | 6.506672968808999  | 32043.0 |
| 3 | rs4615062       | 17434502 | C      | A  | 7.740844927700991e-11 | 6.505552293785633  | 32163.0 |
| 3 | rs13076724      | 17758473 | A      | G  | 7.771245117376833e-11 | 6.504963104367636  | 31885.0 |
| 3 | rs2733517       | 17323763 | G      | A  | 7.870091630794183e-11 | 6.5030628083722055 | 32120.0 |
| 3 | rs283918        | 17328219 | C      | G  | 7.900447061208541e-11 | 6.502483916239567  | 31987.0 |
| 3 | rs2596652       | 17368197 | C      | A  | 7.912997737849163e-11 | 6.502245204305607  | 32149.0 |
| 3 | rs11412361      | 17399660 | C      | CT | 7.915182470508473e-11 | 6.502203688863753  | 31711.0 |
| 3 | rs11713917      | 17382262 | G      | A  | 8.03121277846429e-11  | 6.5000147670045125 | 32139.0 |
| 3 | rs1449886       | 17261930 | G      | A  | 8.244600275284007e-11 | 6.4960687306719125 | 32058.0 |
| 3 | rs283944        | 17346655 | C      | A  | 8.24940376997804e-11  | 6.495981056792062  | 32186.0 |
| 3 | rs7627064       | 17737834 | T      | C  | 8.330082307442581e-11 | 6.494515916963308  | 31892.0 |
| 3 | rs1597394       | 17260188 | C      | T  | 8.331295197656576e-11 | 6.494493996643692  | 32053.0 |
| 3 | rs776423900     | 17313583 | TGGAAA | T  | 8.427472186455086e-11 | 6.492765668527159  | 32058.0 |
| 3 | rs283941        | 17344551 | C      | A  | 8.44660559354879e-11  | 6.4924241368056474 | 32174.0 |
| 3 | rs283946        | 17347636 | T      | C  | 8.44660559354879e-11  | 6.4924241368056474 | 32174.0 |
| 3 | rs283943        | 17346355 | C      | T  | 8.480711932367973e-11 | 6.491817209726034  | 32175.0 |
| 3 | rs9856430       | 90348280 | C      | T  | 8.518411878966293e-11 | 6.4911491047493755 | 31719.0 |
| 3 | rs2596637       | 17285288 | T      | G  | 8.674856680994849e-11 | 6.488407191614907  | 32048.0 |
| 3 | rs12629181      | 90483648 | C      | A  | 8.825007479941249e-11 | 6.485820686411516  | 30867.0 |
| 3 | rs283924        | 17325616 | G      | A  | 8.88344293380907e-11  | 6.484825689003768  | 31890.0 |
| 3 | rs2596645       | 17296356 | T      | C  | 8.896919256950251e-11 | 6.4845971319511975 | 32039.0 |
| 3 | 3:17331124_CA_C | 17331124 | CA     | C  | 8.941164694451039e-11 | 6.483849106770532  | 30840.0 |
| 3 | rs2733502       | 17274422 | C      | T  | 8.994297850457061e-11 | 6.482955591527452  | 32047.0 |
| 3 | rs13079096      | 17795076 | T      | A  | 9.151859788214483e-11 | 6.480335974153067  | 31725.0 |
| 3 | rs2596646       | 17296401 | T      | C  | 9.192148444934949e-11 | 6.479673216366381  | 32043.0 |
| 3 | rs2596672       | 17267023 | G      | A  | 9.270342514599837e-11 | 6.478394971747619  | 32048.0 |
| 3 | rs2733498       | 17276455 | T      | C  | 9.301248372705238e-11 | 6.477892655668027  | 32057.0 |
| 3 | rs13093375      | 17435598 | A      | G  | 9.325832140089187e-11 | 6.4774942570894405 | 32163.0 |
| 3 | rs7609645       | 89248378 | G      | A  | 9.331898841143923e-11 | 6.477396099564541  | 31960.0 |
| 3 | rs4908968       | 17778320 | T      | C  | 9.515356648305372e-11 | 6.474456899914402  | 31847.0 |



|   |                  |           |                |     |                        |                    |         |
|---|------------------|-----------|----------------|-----|------------------------|--------------------|---------|
| 3 | rs7642719        | 17435581  | G              | A   | 9.542979609188414e-11  | 6.474019154873448  | 32162.0 |
| 3 | rs2060628        | 17275173  | G              | C   | 9.600518555400523e-11  | 6.473111290866616  | 32055.0 |
| 3 | rs2733505        | 17271758  | C              | T   | 9.663644914134896e-11  | 6.472121366621279  | 31990.0 |
| 3 | rs11719326       | 17781780  | A              | C   | 9.690580717820529e-11  | 6.471700892247704  | 31841.0 |
| 3 | rs2733508        | 17270788  | T              | C   | 9.912309764921869e-11  | 6.468282440836528  | 31930.0 |
| 3 | rs2596670        | 17265224  | G              | A   | 9.939397017671778e-11  | 6.467869964664018  | 32050.0 |
| 3 | rs6442679        | 17397851  | C              | T   | 9.996693781066171e-11  | 6.467001076373732  | 32137.0 |
| 3 | rs6551402        | 89246713  | G              | A   | 1.0053470959041452e-10 | 6.4661448568664746 | 31964.0 |
| 3 | 3:17316598_AT_A  | 17316598  | AT             | A   | 1.0056006879252172e-10 | 6.466106724686258  | 32096.0 |
| 3 | rs6795664        | 89246622  | A              | G   | 1.0152840628779274e-10 | 6.4646576419887305 | 31965.0 |
| 3 | rs7645756        | 17397336  | T              | C   | 1.0180186903077416e-10 | 6.464250860967742  | 32132.0 |
| 3 | rs2122368        | 17261455  | G              | A   | 1.0188202521695844e-10 | 6.464131829555779  | 32053.0 |
| 3 | rs2733509        | 17264355  | A              | G   | 1.0265171733544593e-10 | 6.462993479699921  | 32052.0 |
| 3 | rs144807058      | 89392008  | T              | TAC | 1.0331026410528122e-10 | 6.462026114672063  | 25352.0 |
| 3 | rs9812199        | 17555377  | C              | T   | 1.0463108758760251e-10 | 6.460103943644234  | 32021.0 |
| 3 | rs62245860       | 17292933  | T              | C   | 1.0476464230125769e-10 | 6.459910906109365  | 31923.0 |
| 3 | rs113252352      | 90356125  | A              | G   | 1.0517756195819036e-10 | 6.45931559768286   | 31299.0 |
| 3 | rs2733520        | 17246392  | G              | A   | 1.0520487906995922e-10 | 6.459276295074582  | 32186.0 |
| 3 | rs2060629        | 17279526  | T              | C   | 1.0529732703920684e-10 | 6.459143359145933  | 32059.0 |
| 3 | rs1375818        | 17270900  | T              | C   | 1.0596936753989195e-10 | 6.458180411327232  | 32047.0 |
| 3 | rs2733507        | 17270795  | T              | C   | 1.0661876495361552e-10 | 6.457255563009628  | 31922.0 |
| 3 | rs2733499        | 17276334  | C              | T   | 1.067254769967556e-10  | 6.4571041145702095 | 32056.0 |
| 3 | rs9852861        | 17513896  | C              | T   | 1.0684453206375884e-10 | 6.456935323205072  | 32042.0 |
| 3 | rs1597393        | 17259757  | T              | C   | 1.0805715752286675e-10 | 6.455226510544772  | 32061.0 |
| 3 | rs2596664        | 17254290  | T              | G   | 1.0848452561403641e-10 | 6.454628734666112  | 32121.0 |
| 3 | rs2596666        | 17263042  | G              | A   | 1.0853505987399673e-10 | 6.454558202740582  | 32053.0 |
| 3 | rs34983821       | 17757940  | G              | GA  | 1.0855826369887157e-10 | 6.4545258273379575 | 31722.0 |
| 3 | rs35417636       | 17262695  | A              | AT  | 1.1012747534210573e-10 | 6.45235191708529   | 31971.0 |
| 3 | rs9682244        | 90484101  | A              | C   | 1.1064395731599012e-10 | 6.451643026819402  | 30788.0 |
| 3 | rs2596663        | 17254001  | A              | T   | 1.111916765180496e-10  | 6.450894787722068  | 32122.0 |
| 3 | rs2167119        | 17262139  | A              | G   | 1.1168324389627578e-10 | 6.450226319069508  | 32053.0 |
| 3 | rs7653828        | 90180985  | C              | T   | 1.1269603112300756e-10 | 6.4488580783122496 | 32186.0 |
| 3 | rs2733504        | 17271759  | A              | G   | 1.1314234559233491e-10 | 6.448258934231408  | 31982.0 |
| 3 | rs781571315      | 17347602  | CACTTCCAG<br>G | C   | 1.164373196339529e-10  | 6.4439058659766175 | 32168.0 |
| 3 | rs62245914       | 17385662  | T              | C   | 1.1872194360682964e-10 | 6.440957721437262  | 32049.0 |
| 3 | rs7644389        | 17502918  | T              | C   | 1.1986157999087842e-10 | 6.439507769905656  | 32043.0 |
| 3 | rs1463218        | 17301087  | G              | C   | 1.226519262977228e-10  | 6.4360137515635785 | 32027.0 |
| 3 | rs7613953        | 17743150  | G              | T   | 1.2295797699565838e-10 | 6.435635259700122  | 31842.0 |
| 3 | rs2733494        | 17297521  | C              | T   | 1.240790536061838e-10  | 6.434256648638472  | 32011.0 |
| 3 | rs9839588        | 17667278  | T              | C   | 1.27253730329169e-10   | 6.430417742637543  | 32035.0 |
| 3 | 3:89248669_CAT_C | 89248669  | CAT            | C   | 1.2945724595270534e-10 | 6.427807837699769  | 31549.0 |
| 3 | rs7627732        | 17784818  | T              | C   | 1.3108211667526236e-10 | 6.425910961172381  | 31752.0 |
| 3 | rs9861749        | 17409919  | G              | A   | 1.3135187580066631e-10 | 6.425598270018632  | 32161.0 |
| 3 | rs9881850        | 17554181  | C              | T   | 1.3257863577630085e-10 | 6.424184143278418  | 32021.0 |
| 3 | 3:147256440_TA_T | 147256440 | TA             | T   | 1.3342407088300354e-10 | 6.423217006531988  | 29073.0 |
| 3 | rs11128838       | 17697368  | G              | A   | 1.3497570394307724e-10 | 6.4214574951102925 | 32018.0 |
| 3 | rs35204863       | 17241552  | T              | TC  | 1.3523174461236616e-10 | 6.421169053188461  | 31972.0 |
| 3 | rs1449883        | 17253429  | T              | A   | 1.3615601098307074e-10 | 6.4201322458478085 | 32127.0 |
| 3 | rs35997387       | 17739538  | C              | A   | 1.406713355274898e-10  | 6.415164009113338  | 31675.0 |
| 3 | rs55740247       | 90362832  | T              | A   | 1.4145998331070252e-10 | 6.41431227294002   | 31143.0 |
| 3 | rs1449884        | 17256687  | G              | C   | 1.4191907055150115e-10 | 6.413818595147129  | 32118.0 |
| 3 | rs2470586        | 17297663  | C              | T   | 1.4494575445808801e-10 | 6.410602404683499  | 32029.0 |
| 3 | 3:17260971_GT_G  | 17260971  | GT             | G   | 1.4620861937288644e-10 | 6.409279833048678  | 30820.0 |
| 3 | rs2247106        | 17308770  | A              | G   | 1.468312758378202e-10  | 6.408631841778978  | 32055.0 |

|   |                  |          |     |              |                        |                    |         |
|---|------------------|----------|-----|--------------|------------------------|--------------------|---------|
| 3 | 3:17303337_GTT_G | 17303337 | GTT | G            | 1.468748143975356e-10  | 6.408586632214668  | 31988.0 |
| 3 | rs9883518        | 17485883 | T   | C            | 1.476303857076324e-10  | 6.407804140984278  | 32044.0 |
| 3 | rs145581379      | 17606493 | G   | AAAA<br>ACAA | 1.4778869924531e-10    | 6.407640682962817  | 31958.0 |
| 3 | rs142250908      | 90206899 | T   | A            | 1.4967881172577231e-10 | 6.405702258994558  | 31755.0 |
| 3 | rs6442680        | 17418533 | T   | C            | 1.500136184975251e-10  | 6.405361390122372  | 32168.0 |
| 3 | rs2733510        | 17263805 | C   | T            | 1.5024294175920043e-10 | 6.4051283434001824 | 32007.0 |
| 3 | rs2733493        | 17302355 | T   | C            | 1.5069918981977796e-10 | 6.404665719319255  | 32034.0 |
| 3 | rs62276591       | 90380252 | A   | T            | 1.5101099861984427e-10 | 6.404350339691867  | 31242.0 |
| 3 | rs9848610        | 17419843 | A   | G            | 1.513257430778287e-10  | 6.404032635505778  | 32173.0 |
| 3 | rs17043541       | 17426846 | T   | C            | 1.5247067361737924e-10 | 6.402882360274936  | 32163.0 |
| 3 | rs17043539       | 17426748 | C   | G            | 1.5391735805144452e-10 | 6.401440933740537  | 32164.0 |
| 3 | rs7623979        | 17406857 | A   | G            | 1.580627671930674e-10  | 6.397382749866451  | 32100.0 |
| 3 | rs11128836       | 17683892 | T   | C            | 1.5850750311088727e-10 | 6.396953565711813  | 32019.0 |
| 3 | rs6788763        | 17519053 | T   | C            | 1.587737308000255e-10  | 6.396697210290648  | 32049.0 |
| 3 | rs6807020        | 17692815 | C   | G            | 1.6004829262172697e-10 | 6.395475701923263  | 32012.0 |
| 3 | rs62276586       | 90376687 | C   | G            | 1.6230832307968725e-10 | 6.393332931764972  | 31203.0 |
| 3 | rs61236237       | 17691510 | T   | C            | 1.6356862835539613e-10 | 6.392150644464508  | 32015.0 |
| 3 | rs7650617        | 17743260 | A   | G            | 1.6413822271668568e-10 | 6.391619227994566  | 31839.0 |
| 3 | rs149819143      | 90035767 | C   | CA           | 1.650513879002891e-10  | 6.390771017645331  | 30076.0 |
| 3 | rs9815204        | 17631880 | C   | T            | 1.6986029390829932e-10 | 6.38637848140959   | 32000.0 |
| 3 | rs2733519        | 17249128 | A   | G            | 1.7100965893087818e-10 | 6.38534663102537   | 32124.0 |
| 3 | rs9847477        | 17607991 | C   | G            | 1.725457884361337e-10  | 6.383978090192692  | 31856.0 |
| 3 | rs9821024        | 90330554 | C   | A            | 1.7423155328598603e-10 | 6.382489872453733  | 31665.0 |
| 3 | rs9812906        | 17525505 | G   | A            | 1.7593755022828534e-10 | 6.3809980485359885 | 32046.0 |
| 3 | rs9799070        | 90400831 | G   | A            | 1.7690464886866338e-10 | 6.380158625491532  | 31335.0 |
| 3 | rs6782889        | 17692938 | G   | T            | 1.788410330965863e-10  | 6.378491273461911  | 31995.0 |
| 3 | 3:17304858_CAA_C | 17304858 | CAA | C            | 1.8270051683886703e-10 | 6.375219981164969  | 30877.0 |
| 3 | rs6784025        | 17701058 | A   | T            | 1.8399958589070883e-10 | 6.374134063902567  | 32001.0 |
| 3 | 3:17702996_CT_C  | 17702996 | CT  | C            | 1.844868085627637e-10  | 6.37372871540896   | 30547.0 |
| 3 | 3:17339063_TA_T  | 17339063 | TA  | T            | 1.903427508855578e-10  | 6.368937012808582  | 28235.0 |
| 3 | rs6799259        | 17427142 | T   | C            | 1.904422463645999e-10  | 6.368856849831783  | 32161.0 |
| 3 | rs12493567       | 17426616 | A   | G            | 1.9150382529228545e-10 | 6.368004079518408  | 32167.0 |
| 3 | rs7648883        | 17407522 | C   | T            | 1.9353310644691061e-10 | 6.366386725531818  | 32144.0 |
| 3 | rs9310524        | 17640706 | C   | T            | 1.9436869262610882e-10 | 6.3657255669560495 | 31990.0 |
| 3 | rs2348001        | 17251577 | T   | G            | 1.958651085658917e-10  | 6.364548435356218  | 32127.0 |
| 3 | rs2733518        | 17249603 | T   | C            | 1.960371879962197e-10  | 6.364413635506259  | 32124.0 |
| 3 | rs9310526        | 17643034 | T   | G            | 1.9748197205436042e-10 | 6.3632863902980255 | 31991.0 |
| 3 | rs2733516        | 17252724 | T   | G            | 1.9892821424943902e-10 | 6.362166047707905  | 32129.0 |
| 3 | rs9860854        | 17645229 | G   | C            | 2.01962088656118e-10   | 6.359841462768397  | 31985.0 |
| 3 | rs58595750       | 90290037 | C   | CT           | 2.0445910088858053e-10 | 6.357953678630509  | 27240.0 |
| 3 | rs11720651       | 89261061 | A   | G            | 2.074457938519988e-10  | 6.355725047737504  | 31920.0 |
| 3 | rs149092028      | 90049995 | A   | C            | 2.076781580452919e-10  | 6.35552977107049   | 29596.0 |
| 3 | rs7617933        | 17252067 | G   | T            | 2.0968266647000828e-10 | 6.35407635735964   | 32119.0 |
| 3 | rs7644020        | 17481548 | C   | T            | 2.1090248482686714e-10 | 6.3531845132929625 | 32049.0 |
| 3 | rs10212255       | 17451108 | A   | G            | 2.1430247397254985e-10 | 6.350725026915907  | 32069.0 |
| 3 | rs12494513       | 17427622 | A   | G            | 2.203491734283313e-10  | 6.346443671289508  | 32164.0 |
| 3 | rs9798866        | 90490026 | G   | A            | 2.2217509490868184e-10 | 6.345173374506732  | 30936.0 |
| 3 | rs112433497      | 90376972 | C   | A            | 2.2976437971891068e-10 | 6.340000524759537  | 31330.0 |
| 3 | rs4377510        | 17686288 | G   | A            | 2.3053616870875642e-10 | 6.339483856097232  | 32014.0 |
| 3 | rs35234876       | 17432517 | G   | C            | 2.359376362886403e-10  | 6.335914480107903  | 32167.0 |
| 3 | rs9856545        | 90402558 | C   | A            | 2.427739329665769e-10  | 6.331509682025085  | 31330.0 |
| 3 | rs73143751       | 90378437 | C   | T            | 2.4394195433035207e-10 | 6.330769234699491  | 31347.0 |
| 3 | rs723813         | 17240402 | C   | G            | 2.497525591814647e-10  | 6.327136409554676  | 32119.0 |
| 3 | rs9682919        | 90368237 | A   | G            | 2.533729421033016e-10  | 6.324914435285116  | 31249.0 |

|   |                  |           |       |             |                        |                    |         |
|---|------------------|-----------|-------|-------------|------------------------|--------------------|---------|
| 3 | rs62277419       | 90434757  | C     | T           | 2.5350674407508574e-10 | 6.324832911087443  | 31043.0 |
| 3 | rs62275607       | 90356428  | T     | A           | 2.57607718273616e-10   | 6.322354398918903  | 31194.0 |
| 3 | rs62275608       | 90356435  | C     | G           | 2.57607718273616e-10   | 6.322354398918903  | 31194.0 |
| 3 | rs2198953        | 90375306  | T     | G           | 2.690145334006776e-10  | 6.3156579112057685 | 31241.0 |
| 3 | rs4637311        | 17686445  | C     | T           | 2.711350014235499e-10  | 6.3144437016411175 | 32011.0 |
| 3 | rs10687921       | 17770840  | T     | TGA         | 2.7446030763826254e-10 | 6.3125581348778255 | 29717.0 |
| 3 | rs6793041        | 90205657  | C     | A           | 2.7729895963208907e-10 | 6.310966086976216  | 28858.0 |
| 3 | rs62266068       | 90497467  | A     | T           | 2.8094615293357186e-10 | 6.3089437729291475 | 31046.0 |
| 3 | rs9840464        | 90369496  | C     | T           | 2.820314450571651e-10  | 6.308346942799133  | 31183.0 |
| 3 | rs62264901       | 90478305  | C     | T           | 2.8281191940284167e-10 | 6.30791912462621   | 31023.0 |
| 3 | rs2733521        | 17243164  | G     | A           | 2.8775618798119094e-10 | 6.305235411469523  | 32121.0 |
| 3 | rs113465892      | 17747914  | TAC   | T           | 2.891676184069592e-10  | 6.304477557141579  | 31319.0 |
| 3 | rs9682654        | 90473594  | G     | T           | 2.971113808104428e-10  | 6.3002784648407175 | 30403.0 |
| 3 | rs2198954        | 90372187  | A     | G           | 2.9730370065633415e-10 | 6.3001781690454735 | 31304.0 |
| 3 | rs2733528        | 17236255  | A     | G           | 3.0117821958917317e-10 | 6.298170969163297  | 32121.0 |
| 3 | rs7651278        | 17443745  | C     | T           | 3.065169848080715e-10  | 6.295446136743219  | 32168.0 |
| 3 | rs9799179        | 90414184  | C     | A           | 3.075560857886289e-10  | 6.294921185749429  | 31057.0 |
| 3 | rs2470581        | 17244668  | C     | G           | 3.2418850464484887e-10 | 6.286746302475202  | 32124.0 |
| 3 | rs2347959        | 90039465  | G     | A           | 3.245224241893099e-10  | 6.286586408252963  | 31638.0 |
| 3 | rs11425835       | 17471456  | T     | TA          | 3.276094392887528e-10  | 6.285115781495564  | 32035.0 |
| 3 | rs62276658       | 90403891  | G     | T           | 3.327013874945474e-10  | 6.282719335615753  | 31317.0 |
| 3 | rs2733526        | 17238792  | T     | C           | 3.44090281131076e-10   | 6.277486431471587  | 32122.0 |
| 3 | rs76658459       | 90357875  | C     | A           | 3.446358001699724e-10  | 6.277240043421522  | 31249.0 |
| 3 | rs2596657        | 17238673  | G     | A           | 3.4597345727539264e-10 | 6.276637487785997  | 32112.0 |
| 3 | 3:17279462_TA_T  | 17279462  | TA    | T           | 3.5200627563014284e-10 | 6.273947928023027  | 31835.0 |
| 3 | rs9823767        | 17615737  | A     | G           | 3.631101345215965e-10  | 6.2691131818530845 | 31948.0 |
| 3 | rs2596658        | 17245725  | C     | T           | 3.639473451150596e-10  | 6.268754524751627  | 32129.0 |
| 3 | rs2733529        | 17235874  | C     | T           | 3.7459253199487286e-10 | 6.264263110704932  | 32108.0 |
| 3 | rs201902007      | 90423228  | G     | GA          | 3.8994082240492825e-10 | 6.258001999684257  | 30734.0 |
| 3 | rs759739186      | 17421533  | GTGTA | G           | 4.0559207247942577e-10 | 6.2518603198392855 | 31603.0 |
| 3 | rs10656408       | 17791796  | C     | CATA<br>TAT | 4.057895634302807e-10  | 6.25178431025808   | 29811.0 |
| 3 | rs10662235       | 17564583  | G     | GTAT        | 4.1862793810347685e-10 | 6.246919027517609  | 31844.0 |
| 3 | rs2279832        | 147101640 | T     | C           | 4.2303786447138963e-10 | 6.245281376143963  | 31865.0 |
| 3 | rs6772394        | 17488124  | C     | T           | 4.269819844730177e-10  | 6.243830760147801  | 32045.0 |
| 3 | rs9854201        | 17471528  | A     | G           | 4.3115906002323777e-10 | 6.242308657171183  | 32063.0 |
| 3 | rs2733527        | 17237409  | A     | T           | 4.435781149933546e-10  | 6.237866794871361  | 32118.0 |
| 3 | rs5846952        | 17227194  | T     | TA          | 4.466940896612823e-10  | 6.236771372195902  | 30893.0 |
| 3 | rs11915971       | 17779893  | A     | T           | 4.4952226867524217e-10 | 6.2357835619466675 | 31374.0 |
| 3 | rs13320693       | 17464812  | A     | T           | 4.53919788554256e-10   | 6.234259605856604  | 31984.0 |
| 3 | rs9310528        | 17661932  | C     | T           | 4.65980034532062e-10   | 6.230152941805053  | 31886.0 |
| 3 | 3:17398486_TAA_T | 17398486  | TAA   | T           | 4.825367803379669e-10  | 6.224681002575593  | 31926.0 |
| 3 | rs9681339        | 90473595  | A     | T           | 5.014400051011565e-10  | 6.218653263966407  | 30379.0 |
| 3 | rs9839103        | 147228736 | C     | T           | 5.192440872668541e-10  | 6.213175472825212  | 30662.0 |
| 3 | rs13320647       | 17589880  | A     | C           | 5.510672237216866e-10  | 6.2038259718734174 | 31997.0 |
| 3 | rs13327810       | 17464911  | C     | A           | 5.550205194263967e-10  | 6.202701499846581  | 32061.0 |
| 3 | rs9875973        | 17584573  | T     | C           | 5.610342300051409e-10  | 6.201005864453286  | 31970.0 |
| 3 | rs11128078       | 90030538  | C     | T           | 5.639810392481288e-10  | 6.200181441631368  | 31639.0 |
| 3 | rs9810675        | 17449619  | C     | T           | 5.813910681366148e-10  | 6.195394819039035  | 32071.0 |
| 3 | rs11708391       | 17414753  | A     | C           | 6.051400128786527e-10  | 6.189086161939107  | 32140.0 |
| 3 | rs34892692       | 17448866  | G     | A           | 6.343949519271295e-10  | 6.1816389275722035 | 32059.0 |
| 3 | rs11717644       | 17461255  | C     | T           | 6.467329307355059e-10  | 6.1785981117027555 | 32070.0 |
| 3 | rs2316653        | 90442925  | A     | G           | 6.468243081586934e-10  | 6.178575802654545  | 30932.0 |
| 3 | rs9878954        | 17509481  | T     | A           | 6.584988755999898e-10  | 6.175750548408445  | 32053.0 |
| 3 | 3:17462769_ACT_A | 17462769  | ACT   | A           | 7.197403675217658e-10  | 6.161686938799421  | 31959.0 |

|   |                 |           |    |      |                        |                    |         |
|---|-----------------|-----------|----|------|------------------------|--------------------|---------|
| 3 | rs6442683       | 17462945  | G  | A    | 7.208793010605877e-10  | 6.161436605115073  | 32064.0 |
| 3 | 3:17602111_TA_T | 17602111  | TA | T    | 7.385612456162229e-10  | 6.157598893192391  | 31738.0 |
| 3 | 3:17267802_CT_C | 17267802  | CT | C    | 7.56675543313846e-10   | 6.153759184047128  | 28760.0 |
| 3 | rs6787756       | 17453223  | T  | C    | 7.615572085178094e-10  | 6.152739747768706  | 32063.0 |
| 3 | rs1463221       | 17221017  | T  | C    | 7.641088184674238e-10  | 6.152209429857828  | 31285.0 |
| 3 | rs9756494       | 17588575  | A  | G    | 7.642845150439375e-10  | 6.1521729772745966 | 31994.0 |
| 3 | rs6442681       | 17454766  | A  | T    | 7.745374977985819e-10  | 6.150059776681527  | 32063.0 |
| 3 | rs1875748       | 147102874 | C  | T    | 7.950917193115554e-10  | 6.145904382829273  | 31859.0 |
| 3 | rs9799190       | 90461761  | A  | G    | 8.038964801731507e-10  | 6.144156312684956  | 30886.0 |
| 3 | rs7632989       | 17462283  | G  | T    | 9.121844394591506e-10  | 6.1240636240694    | 32066.0 |
| 3 | rs2733530       | 17233114  | A  | G    | 9.504347412558647e-10  | 6.1175189289598455 | 31312.0 |
| 3 | rs9848766       | 17412485  | G  | C    | 9.632048006194992e-10  | 6.115391035002253  | 32156.0 |
| 3 | rs9874826       | 17410188  | A  | T    | 9.65556376675017e-10   | 6.115002189874545  | 32157.0 |
| 3 | rs112149405     | 89886780  | T  | C    | 9.66241531715435e-10   | 6.114889069708164  | 31537.0 |
| 3 | rs201959300     | 17385963  | T  | C    | 9.7795541039246e-10    | 6.112967096120636  | 32110.0 |
| 3 | rs283936        | 17367376  | A  | T    | 9.867431298342778e-10  | 6.111539918037486  | 32125.0 |
| 3 | rs9820703       | 17414107  | A  | G    | 9.89838248815261e-10   | 6.111040202074029  | 32159.0 |
| 3 | rs10663489      | 17526824  | T  | TTTA | 9.93551795459552e-10   | 6.110442646064807  | 31959.0 |
| 3 | rs9823064       | 17520222  | A  | G    | 1.0594379758376213e-09 | 6.100187979985567  | 32046.0 |
| 3 | rs2198947       | 90487716  | G  | C    | 1.0601338807411276e-09 | 6.1000830214806445 | 30521.0 |
| 3 | rs6763593       | 17379330  | G  | A    | 1.0899885989996202e-09 | 6.095642359874638  | 32134.0 |
| 3 | rs9811041       | 89367555  | G  | A    | 1.1027216446578372e-09 | 6.093784386146092  | 31205.0 |
| 3 | rs56328245      | 90456144  | T  | A    | 1.1094005526337707e-09 | 6.092818163683464  | 30722.0 |
| 3 | rs9310517       | 17550666  | G  | A    | 1.111586516395955e-09  | 6.0925031568228745 | 32050.0 |
| 3 | rs2733515       | 17323831  | T  | C    | 1.132352843794062e-09  | 6.089540405665464  | 32130.0 |
| 3 | 3:17776417_C_CA | 17776417  | C  | CA   | 1.1494198590563922e-09 | 6.087144832585776  | 28297.0 |
| 3 | rs62266110      | 93537923  | G  | A    | 1.1768907828427615e-09 | 6.0833608269175325 | 31789.0 |
| 3 | rs9821318       | 17567220  | C  | T    | 1.1778794040157895e-09 | 6.083226259291004  | 32005.0 |
| 3 | rs9757853       | 90436845  | A  | G    | 1.1825386208317286e-09 | 6.082593541818183  | 30957.0 |
| 3 | rs2596656       | 17235490  | G  | A    | 1.2114388726085825e-09 | 6.078722382657428  | 32043.0 |
| 3 | rs2100628       | 90439303  | A  | G    | 1.2388983816427347e-09 | 6.075126732870567  | 30808.0 |
| 3 | rs9831141       | 90433267  | C  | T    | 1.2394911708167675e-09 | 6.075049970576347  | 31152.0 |
| 3 | rs9757339       | 17569829  | T  | C    | 1.2469750894894139e-09 | 6.074083918519257  | 31980.0 |
| 3 | rs2733489       | 17312588  | A  | G    | 1.2493539451106585e-09 | 6.073778030545197  | 32078.0 |
| 3 | rs10510475      | 17422679  | A  | T    | 1.2956195165956787e-09 | 6.0679391752891245 | 32172.0 |
| 3 | rs283942        | 17346033  | A  | G    | 1.3229206069877164e-09 | 6.06458832758192   | 32148.0 |
| 3 | rs1449882       | 17311336  | T  | C    | 1.328104640842911e-09  | 6.0639596784468806 | 32064.0 |
| 3 | rs35521582      | 17496173  | T  | C    | 1.3432634597981624e-09 | 6.0621350530453535 | 32029.0 |
| 3 | rs283930        | 17360961  | A  | T    | 1.3520189599944006e-09 | 6.06109030044814   | 32140.0 |
| 3 | rs283934        | 17367065  | T  | C    | 1.3520288961259135e-09 | 6.061089118566817  | 32140.0 |
| 3 | rs1992737       | 17422005  | A  | G    | 1.355899505192296e-09  | 6.060629360817982  | 32175.0 |
| 3 | rs9850127       | 17398386  | T  | C    | 1.368712803681188e-09  | 6.0591164499841605 | 32100.0 |
| 3 | rs13318886      | 17399281  | G  | T    | 1.4141720161802712e-09 | 6.053858091339857  | 32131.0 |
| 3 | rs17200839      | 17425832  | C  | T    | 1.4187071239722966e-09 | 6.053342575643916  | 32186.0 |
| 3 | rs34958195      | 17434610  | G  | GT   | 1.4282187406436758e-09 | 6.052266566195757  | 31092.0 |
| 3 | rs4312642       | 17434006  | A  | G    | 1.4579018234152366e-09 | 6.048952997151655  | 32164.0 |
| 3 | rs1470667       | 17309934  | C  | A    | 1.472343250946373e-09  | 6.0473645845670685 | 32054.0 |
| 3 | rs9817290       | 17408297  | A  | C    | 1.4861727235914304e-09 | 6.045857650499399  | 32129.0 |
| 3 | rs9866664       | 90437988  | A  | G    | 1.5705946810903372e-09 | 6.0369447495101545 | 30947.0 |
| 3 | rs35863421      | 17521749  | A  | AG   | 1.5730029574227416e-09 | 6.036697401490853  | 31873.0 |
| 3 | rs2060623       | 17338680  | T  | C    | 1.5762581594218193e-09 | 6.036363653774417  | 32109.0 |
| 3 | rs9713931       | 90390418  | A  | G    | 1.597602478388743e-09  | 6.034191774732009  | 31224.0 |
| 3 | rs11389760      | 17440236  | A  | AC   | 1.5985863227505005e-09 | 6.034092347263081  | 32159.0 |
| 3 | rs2348004       | 17295308  | G  | A    | 1.633961377025016e-09  | 6.030556395053347  | 32015.0 |

|   |                      |           |         |     |                        |                    |         |
|---|----------------------|-----------|---------|-----|------------------------|--------------------|---------|
| 3 | rs2733496            | 17281330  | C       | T   | 1.6602153843614626e-09 | 6.027980049290748  | 32024.0 |
| 3 | rs2596641            | 17291294  | A       | G   | 1.6658060979982918e-09 | 6.027436554029865  | 32019.0 |
| 3 | rs6762516            | 17375264  | T       | A   | 1.6707422185051005e-09 | 6.026958169828683  | 32136.0 |
| 3 | rs9858006            | 90390344  | A       | T   | 1.7021074303941292e-09 | 6.023950214086997  | 31225.0 |
| 3 | rs9861554            | 90349123  | C       | G   | 1.7040276100930848e-09 | 6.0237678257257805 | 31410.0 |
| 3 | rs62245947           | 17497051  | T       | G   | 1.705263136152051e-09  | 6.023650575084336  | 32034.0 |
| 3 | rs1521806            | 90090619  | A       | C   | 1.7153297908557355e-09 | 6.022698329326974  | 31854.0 |
| 3 | rs7647905            | 17433383  | T       | C   | 1.7274894739377767e-09 | 6.02155533069468   | 32167.0 |
| 3 | rs34096182           | 89465849  | A       | T   | 1.7416575977787074e-09 | 6.020233388473454  | 30026.0 |
| 3 | rs36029966           | 17389500  | C       | CA  | 1.7523842740917609e-09 | 6.019239498488884  | 32072.0 |
| 3 | rs11449656           | 17371025  | T       | TA  | 1.7847858927003157e-09 | 6.016272900552857  | 32100.0 |
| 3 | rs1867772            | 17391339  | T       | A   | 1.7907626987786938e-09 | 6.015731419711689  | 32141.0 |
| 3 | rs7614318            | 17440747  | C       | G   | 1.8019316936768264e-09 | 6.014724245504999  | 32165.0 |
| 3 | rs283929             | 17359916  | C       | T   | 1.8462300987663765e-09 | 6.010788613645768  | 32142.0 |
| 3 | rs9843640            | 17441862  | C       | G   | 1.941805314923773e-09  | 6.002601720292059  | 32166.0 |
| 3 | rs2596643            | 17294388  | A       | G   | 1.9491244723370795e-09 | 6.001991050476347  | 32019.0 |
| 3 | rs2733495            | 17296298  | A       | T   | 1.9742851995278287e-09 | 5.999908687719621  | 32011.0 |
| 3 | 3:17442866_CATATGT_C | 17442866  | CATATGT | C   | 2.1013376346676632e-09 | 5.989773279452883  | 32022.0 |
| 3 | rs528162866          | 17747475  | C       | CT  | 2.1352085799300925e-09 | 5.987172071963976  | 29292.0 |
| 3 | rs2348005            | 17295756  | T       | C   | 2.2611172495202192e-09 | 5.977842829186933  | 31999.0 |
| 3 | rs9864494            | 17473346  | A       | G   | 2.279827717811538e-09  | 5.976499844293282  | 32057.0 |
| 3 | rs1449888            | 17272276  | T       | C   | 2.283351798664924e-09  | 5.9762480976306485 | 32012.0 |
| 3 | 3:90272973_AAAAT_A   | 90272973  | AAAAT   | A   | 2.293738966218558e-09  | 5.975508274455246  | 31144.0 |
| 3 | rs9877833            | 90138312  | G       | A   | 2.304407585880217e-09  | 5.974751794434964  | 31912.0 |
| 3 | rs9835988            | 17517721  | A       | G   | 2.395120388063961e-09  | 5.968454075208341  | 32066.0 |
| 3 | rs283940             | 17344285  | A       | T   | 2.414498597022578e-09  | 5.9671389003014275 | 32170.0 |
| 3 | rs1449885            | 17261756  | A       | G   | 2.437753730424244e-09  | 5.9655741083863605 | 32022.0 |
| 3 | 3:17346381_TA_T      | 17346381  | TA      | T   | 2.458025378920036e-09  | 5.964221884959509  | 32158.0 |
| 3 | rs5846961            | 17467525  | G       | GA  | 2.467846148299688e-09  | 5.963570689973358  | 32071.0 |
| 3 | rs11419267           | 17487665  | C       | CT  | 2.4715838302346407e-09 | 5.96332351487291   | 32044.0 |
| 3 | rs1449887            | 17272228  | A       | T   | 2.5233245633718826e-09 | 5.959938774090163  | 32013.0 |
| 3 | rs283945             | 17346756  | C       | T   | 2.546924255988956e-09  | 5.958417333848318  | 32171.0 |
| 3 | rs7615612            | 17516671  | G       | C   | 2.579184589222341e-09  | 5.956359617993027  | 31446.0 |
| 3 | rs17200818           | 17410411  | T       | A   | 2.622271132217394e-09  | 5.953650109747441  | 32160.0 |
| 3 | rs62273833           | 147255596 | G       | A   | 2.642474894101568e-09  | 5.952394489936948  | 31149.0 |
| 3 | rs62276243           | 90121534  | C       | T   | 2.750462075101354e-09  | 5.9458379157627546 | 31841.0 |
| 3 | rs3058046            | 147090583 | G       | GAA | 2.774697214046381e-09  | 5.944400928654988  | 30090.0 |
| 3 | rs9681592            | 90485493  | A       | G   | 2.851523816326651e-09  | 5.939925069182968  | 31188.0 |
| 3 | rs4974357            | 90127762  | T       | C   | 3.071391871134277e-09  | 5.9277363035417485 | 31858.0 |
| 3 | rs1446303            | 17482564  | T       | C   | 3.168542233341763e-09  | 5.922619072286135  | 32049.0 |
| 3 | rs2028874            | 17426715  | C       | G   | 3.3590318363439358e-09 | 5.913014211822586  | 32171.0 |
| 3 | rs17804073           | 90124806  | T       | A   | 3.439290490621876e-09  | 5.909125291642253  | 31877.0 |
| 3 | rs2596648            | 17302558  | A       | G   | 3.602949024415061e-09  | 5.901461777527333  | 32005.0 |
| 3 | rs2733492            | 17308296  | C       | A   | 3.655730159262074e-09  | 5.899062380332516  | 32043.0 |
| 3 | rs9830240            | 17398284  | G       | T   | 3.781867856487939e-09  | 5.893462138105296  | 31939.0 |
| 3 | rs2596650            | 17307841  | C       | T   | 3.784217801437365e-09  | 5.8933595401153624 | 32039.0 |
| 3 | rs7613624            | 147237920 | T       | C   | 3.797031045207153e-09  | 5.892801205862018  | 30816.0 |
| 3 | rs9851518            | 17455397  | A       | G   | 3.950817449624112e-09  | 5.886239473461068  | 32063.0 |
| 3 | rs6801690            | 17406273  | C       | T   | 4.084444692510904e-09  | 5.8807366942570365 | 32142.0 |
| 3 | rs2596649            | 17307395  | G       | A   | 4.0863896788412025e-09 | 5.880657900317372  | 32041.0 |
| 3 | rs9870604            | 147234379 | C       | G   | 4.160197250889698e-09  | 5.8776945188184975 | 30792.0 |
| 3 | rs2596655            | 17232635  | G       | A   | 4.251465012227832e-09  | 5.874100073796918  | 31239.0 |
| 3 | rs75948196           | 90420549  | T       | C   | 4.3411943332016224e-09 | 5.870638693351692  | 30960.0 |
| 3 | rs7652792            | 17439143  | G       | A   | 4.409280998516757e-09  | 5.86805834697288   | 32163.0 |

|   |                    |           |       |                      |                        |                    |         |
|---|--------------------|-----------|-------|----------------------|------------------------|--------------------|---------|
| 3 | rs2596662          | 17253663  | A     | T                    | 4.414620385550493e-09  | 5.867857637772263  | 32080.0 |
| 3 | rs6792443          | 17458313  | G     | T                    | 4.455959820786778e-09  | 5.866311623608463  | 32060.0 |
| 3 | rs35742571         | 17459374  | A     | AT                   | 4.696869794338952e-09  | 5.8575706671798    | 31877.0 |
| 3 | rs73004648         | 147137674 | A     | G                    | 4.759360259641056e-09  | 5.855374598792473  | 32043.0 |
| 3 | 3:17428891_AT_A    | 17428891  | AT    | A                    | 4.913473099116154e-09  | 5.850076386163192  | 32165.0 |
| 3 | rs75162052         | 147137597 | T     | C                    | 5.116264616483677e-09  | 5.84334583702532   | 32041.0 |
| 3 | rs57499472         | 147239337 | T     | C                    | 5.15222874753324e-09   | 5.842179365820226  | 30828.0 |
| 3 | rs9842092          | 147241494 | A     | G                    | 5.233879866726416e-09  | 5.839560211412637  | 30829.0 |
| 3 | rs5846955          | 17306752  | A     | AG                   | 5.348886418802155e-09  | 5.835937752263532  | 31962.0 |
| 3 | rs7625855          | 17470782  | T     | A                    | 6.136832127763889e-09  | 5.81298565727831   | 32064.0 |
| 3 | rs9310516          | 17470827  | T     | A                    | 6.136832127763889e-09  | 5.81298565727831   | 32064.0 |
| 3 | rs1374197          | 17394615  | A     | G                    | 6.245441011947333e-09  | 5.810049402299937  | 31882.0 |
| 3 | rs2168715          | 90452164  | A     | C                    | 6.498409661178453e-09  | 5.803398501490575  | 30903.0 |
| 3 | rs79769556         | 90423789  | A     | G                    | 6.671965352986565e-09  | 5.7989795844944965 | 30918.0 |
| 3 | rs71105148         | 90190366  | C     | CA                   | 7.146937653828485e-09  | 5.7874348871536885 | 28351.0 |
| 3 | rs2733525          | 17238881  | C     | T                    | 7.193843407579309e-09  | 5.7863355751113    | 32071.0 |
| 3 | rs10865749         | 17450271  | A     | T                    | 7.2551279569350886e-09 | 5.784909729195174  | 32072.0 |
| 3 | rs2121262          | 17470114  | C     | T                    | 7.469262367275186e-09  | 5.7800180222270825 | 32064.0 |
| 3 | rs9813532          | 17465704  | G     | A                    | 7.54419878536488e-09   | 5.7783383277946445 | 32059.0 |
| 3 | rs9882273          | 17464102  | C     | T                    | 7.616666788650926e-09  | 5.7767293232286585 | 32061.0 |
| 3 | rs9824952          | 17448437  | T     | A                    | 7.940389199298085e-09  | 5.76971885911191   | 32059.0 |
| 3 | rs12488687         | 17461342  | A     | T                    | 8.005571972349632e-09  | 5.768340944530977  | 32059.0 |
| 3 | rs201380658        | 17393317  | AG    | A                    | 8.087976844122914e-09  | 5.766614497257367  | 30357.0 |
| 3 | 3:17474521_CCCCA_C | 17474521  | CCCCA | C                    | 8.276724485687683e-09  | 5.762723673453406  | 32023.0 |
| 3 | rs6442682          | 17461731  | T     | C                    | 8.305424831044279e-09  | 5.762139616369718  | 32070.0 |
| 3 | rs1120412          | 17452025  | G     | A                    | 8.305779766114334e-09  | 5.762132405669299  | 32066.0 |
| 3 | rs34633537         | 17852607  | G     | GA                   | 8.460693380244274e-09  | 5.759013505305696  | 31957.0 |
| 3 | rs2733522          | 17243002  | T     | C                    | 8.472629166308509e-09  | 5.758775509080987  | 32071.0 |
| 3 | rs7625175          | 17455081  | C     | T                    | 8.911219892393935e-09  | 5.750248829042838  | 32066.0 |
| 3 | rs34732565         | 90144346  | T     | A                    | 9.08373065623957e-09   | 5.747006374034588  | 31900.0 |
| 3 | rs9681820          | 90481415  | A     | T                    | 9.819561357021818e-09  | 5.733816420058807  | 30981.0 |
| 3 | rs2198951          | 90460470  | G     | C                    | 9.890160353991436e-09  | 5.732601858673518  | 30910.0 |
| 3 | rs1532769          | 147090343 | C     | T                    | 1.0184218144155572e-08 | 5.727632011390803  | 31249.0 |
| 3 | rs12632358         | 17740995  | C     | T                    | 1.065505002779513e-08  | 5.719957821055236  | 29932.0 |
| 3 | rs9830582          | 17458832  | C     | A                    | 1.0659810173248368e-08 | 5.719881929857707  | 32078.0 |
| 3 | rs1394041          | 147096847 | C     | A                    | 1.0727280084204777e-08 | 5.7188097817204655 | 31806.0 |
| 3 | 3:17452696_AT_A    | 17452696  | AT    | A                    | 1.3708605455888141e-08 | 5.676989286787379  | 30456.0 |
| 3 | rs4974358          | 90141506  | A     | G                    | 1.4208940691664729e-08 | 5.670851638774238  | 31972.0 |
| 3 | rs34185023         | 147095042 | G     | AAAA                 | 1.4300303536887922e-08 | 5.6697535966276185 | 31821.0 |
| 3 | rs142854083        | 17774212  | A     | TAAA<br>TAAA<br>TAAA | 1.4438276666651231e-08 | 5.668108219232932  | 30741.0 |
| 3 | rs9865185          | 89252480  | A     | CAAA                 | 1.4836749275724107e-08 | 5.663440661114489  | 31788.0 |
| 3 | rs7632016          | 147100106 | A     | C                    | 1.7641899785133312e-08 | 5.633665553340478  | 32022.0 |
| 3 | rs6577596          | 17832829  | C     | T                    | 2.2395682062269682e-08 | 5.592396374669118  | 31716.0 |
| 3 | rs112272175        | 89269015  | C     | T                    | 2.24688252982316e-08   | 5.591830390511554  | 31673.0 |
| 3 | rs2060626          | 17339260  | T     | A                    | 2.2635658772900946e-08 | 5.590546092122966  | 29018.0 |
| 3 | rs2596682          | 17221849  | C     | A                    | 2.291470943477489e-08  | 5.588418334076179  | 31272.0 |
| 3 | rs2596676          | 17220717  | G     | A                    | 2.2988711049416235e-08 | 5.58785829183338   | 31257.0 |
| 3 | rs10804719         | 147117260 | A     | G                    | 2.333680813045812e-08  | 5.5852471593706134 | 32018.0 |
| 3 | rs283914           | 17330649  | T     | C                    | 2.3381263670837704e-08 | 5.584916417063188  | 32064.0 |
| 3 | rs73004638         | 147113586 | A     | T                    | 2.436295750902088e-08  | 5.57776421283271   | 32011.0 |
| 3 | rs2470578          | 17330092  | G     | A                    | 2.5688301175816943e-08 | 5.5685397629165925 | 31801.0 |
| 3 | rs73004642         | 147116846 | A     | C                    | 2.6149752873805392e-08 | 5.565436145606383  | 32017.0 |
| 3 | rs374871846        | 89979666  | AC    | A                    | 2.7571019574792272e-08 | 5.556200476076803  | 27026.0 |

|   |                 |           |    |      |                        |                    |         |
|---|-----------------|-----------|----|------|------------------------|--------------------|---------|
| 3 | rs62274613      | 89157751  | G  | A    | 2.8025679008703726e-08 | 5.553343369121187  | 32010.0 |
| 3 | rs62274656      | 89271959  | C  | T    | 2.8504831533809592e-08 | 5.550380614746951  | 31957.0 |
| 3 | rs62274657      | 89272043  | C  | G    | 2.938196051321304e-08  | 5.5450801165635095 | 31955.0 |
| 3 | rs2279830       | 147105790 | T  | C    | 2.996055757166998e-08  | 5.541667044712511  | 32186.0 |
| 3 | rs12107172      | 147134039 | A  | G    | 3.0809350587529045e-08 | 5.536774103732859  | 32023.0 |
| 3 | rs7373232       | 89268266  | A  | G    | 3.21498690295381e-08   | 5.529306779811202  | 31959.0 |
| 3 | rs73004644      | 147124706 | G  | A    | 3.2359367948082e-08    | 5.528167144065436  | 32039.0 |
| 3 | rs62274614      | 89159719  | C  | T    | 3.2631838258342037e-08 | 5.526695616038647  | 32004.0 |
| 3 | rs57468276      | 89269988  | A  | T    | 3.4479578660735746e-08 | 5.517020215133528  | 31965.0 |
| 3 | rs1463222       | 17221252  | C  | A    | 3.4899737659542324e-08 | 5.514890401152521  | 31266.0 |
| 3 | rs9824191       | 17453982  | T  | C    | 3.5010773137913804e-08 | 5.5143317094901345 | 32062.0 |
| 3 | rs62274654      | 89271419  | C  | G    | 3.828366102729661e-08  | 5.498591620260124  | 31960.0 |
| 3 | rs1503738       | 147093600 | A  | G    | 4.30290559708264e-08   | 5.477946343696077  | 31457.0 |
| 3 | rs9809894       | 89261561  | A  | T    | 4.322257883663679e-08  | 5.477152053945327  | 31992.0 |
| 3 | rs9852594       | 89262358  | C  | A    | 4.403254876593951e-08  | 5.473864626328236  | 31991.0 |
| 3 | rs9310112       | 89260495  | A  | C    | 4.51494112300714e-08   | 5.469426496832137  | 31998.0 |
| 3 | rs9852981       | 89253461  | T  | C    | 4.8516767742428295e-08 | 5.456662350193096  | 32017.0 |
| 3 | rs76407105      | 90329812  | G  | A    | 4.935801479370472e-08  | 5.4536077493821    | 31436.0 |
| 5 | rs145120402     | 93174765  | A  | C    | 1.8342886641780968e-09 | 6.011840399143533  | 32127.0 |
| 5 | 5:94068140_AC_A | 94068140  | AC | A    | 6.7993445650989546e-09 | 5.7958069423521925 | 31981.0 |
| 5 | rs11955446      | 94073541  | T  | C    | 9.945874699859212e-09  | 5.731649302485057  | 32092.0 |
| 5 | rs369272402     | 93106457  | G  | A    | 1.0568052384284206e-08 | 5.72135066333192   | 32059.0 |
| 5 | rs115877304     | 92797166  | C  | T    | 1.1105662817024772e-08 | 5.7129158126540815 | 32184.0 |
| 5 | rs9791082       | 94075700  | T  | C    | 1.1245505958331708e-08 | 5.710786788866312  | 32100.0 |
| 5 | rs7442779       | 92788278  | A  | G    | 1.2380968628457991e-08 | 5.694395640362044  | 32186.0 |
| 5 | rs11955417      | 94073489  | T  | C    | 1.2896839546535178e-08 | 5.687426082530264  | 32095.0 |
| 5 | rs11135411      | 94072196  | A  | T    | 1.3228063419128444e-08 | 5.683092553355047  | 32085.0 |
| 5 | rs10684163      | 93998112  | G  | GTTA | 1.3667150269273305e-08 | 5.6775075422171195 | 32054.0 |
| 5 | rs200712407     | 93280729  | T  | TA   | 1.4138860793113416e-08 | 5.671698550493665  | 32117.0 |
| 5 | rs17083079      | 92683607  | G  | A    | 1.4279443174335546e-08 | 5.670003704796567  | 32186.0 |
| 5 | rs72773593      | 94068179  | T  | G    | 1.5587772116202267e-08 | 5.654965344305387  | 32134.0 |
| 5 | 5:92797041_TG_T | 92797041  | TG | T    | 1.5933130384938252e-08 | 5.651200290175116  | 32181.0 |
| 5 | rs140083818     | 93150564  | G  | A    | 1.661870673012065e-08  | 5.6439554769913185 | 32154.0 |
| 5 | rs880264        | 94069803  | T  | C    | 1.6626696663996366e-08 | 5.643872766489857  | 31943.0 |
| 5 | rs35111621      | 94067705  | A  | G    | 1.6689572242714282e-08 | 5.643223232545884  | 32128.0 |
| 5 | rs12523457      | 94069338  | C  | T    | 1.6896249002667543e-08 | 5.641104785849002  | 32119.0 |
| 5 | rs141834426     | 93385558  | G  | C    | 1.7166811229392963e-08 | 5.638369229636546  | 32161.0 |
| 5 | rs12109404      | 94072931  | A  | G    | 1.768156577594884e-08  | 5.633278416558889  | 31955.0 |
| 5 | rs2003118       | 94069530  | G  | A    | 1.7728439717585573e-08 | 5.632822016473777  | 32126.0 |
| 5 | rs61152231      | 94067762  | A  | G    | 1.784697721963519e-08  | 5.631673053977108  | 32137.0 |
| 5 | rs74765438      | 94080778  | G  | GA   | 1.7902745712377323e-08 | 5.631135061101539  | 31943.0 |
| 5 | rs57402656      | 94065844  | G  | GT   | 1.7918105660953198e-08 | 5.630987171095782  | 31991.0 |
| 5 | rs199920547     | 93961802  | C  | CA   | 1.84174153676272e-08   | 5.626245525115798  | 31941.0 |
| 5 | rs61238929      | 94079820  | T  | C    | 1.8422418248498005e-08 | 5.62619865022276   | 32015.0 |
| 5 | rs67577452      | 94068397  | A  | G    | 1.893610225423365e-08  | 5.621450259368147  | 32137.0 |
| 5 | rs67573880      | 94068468  | A  | G    | 1.893610225423365e-08  | 5.621450259368147  | 32137.0 |
| 5 | rs114072973     | 93372299  | C  | A    | 1.97020529407094e-08   | 5.6145973099942195 | 32154.0 |
| 5 | rs12515845      | 94069040  | T  | G    | 2.0298945456439636e-08 | 5.609433945501047  | 32125.0 |
| 5 | rs114891177     | 93397741  | C  | T    | 2.033055720835697e-08  | 5.609164617797831  | 32138.0 |
| 5 | rs1451735       | 93983612  | C  | A    | 2.469223853612216e-08  | 5.575427742024976  | 32186.0 |
| 5 | rs115840240     | 93509229  | G  | A    | 2.5653435267643315e-08 | 5.568776456594041  | 31920.0 |
| 5 | rs17083945      | 94049046  | T  | C    | 3.4196639092687804e-08 | 5.518468685653462  | 32186.0 |
| 5 | rs1390644       | 94000772  | G  | T    | 3.783847730314352e-08  | 5.500654150151289  | 32171.0 |
| 5 | rs7735473       | 94063520  | T  | G    | 3.8052210577467335e-08 | 5.499661006674137  | 32155.0 |

|   |                  |          |     |       |                        |                    |         |
|---|------------------|----------|-----|-------|------------------------|--------------------|---------|
| 5 | rs78371824       | 94042149 | A   | AT    | 3.80733840953267e-08   | 5.4995629154516585 | 32121.0 |
| 5 | rs75522556       | 93970841 | C   | CCT   | 3.859468230726556e-08  | 5.497164418483997  | 32072.0 |
| 5 | rs67674687       | 94060082 | C   | G     | 3.888293750538777e-08  | 5.495851608610331  | 32162.0 |
| 5 | rs2201620        | 94004124 | C   | T     | 3.9184055835361716e-08 | 5.494490256559926  | 32141.0 |
| 5 | rs66901899       | 94062810 | A   | C     | 3.920829823461168e-08  | 5.494381098641886  | 32164.0 |
| 5 | rs72773517       | 93970216 | C   | T     | 3.975420029750141e-08  | 5.491940203508388  | 32121.0 |
| 5 | 5:92872910_GA_G  | 92872910 | GA  | G     | 4.000339006564027e-08  | 5.490836785587875  | 32068.0 |
| 5 | rs1006626        | 94015064 | C   | T     | 4.049792993616618e-08  | 5.488666553165093  | 32153.0 |
| 5 | rs66578784       | 94015540 | T   | C     | 4.049792993616618e-08  | 5.488666553165093  | 32153.0 |
| 5 | rs67313609       | 94016254 | T   | G     | 4.049792993616618e-08  | 5.488666553165093  | 32153.0 |
| 5 | rs143236930      | 94006853 | T   | TTATC | 4.111161485642439e-08  | 5.4860089190386345 | 32149.0 |
| 5 | rs6890092        | 94024807 | G   | A     | 4.280990766094194e-08  | 5.4788500024400815 | 32151.0 |
| 5 | rs12653116       | 94024851 | G   | A     | 4.280990766094194e-08  | 5.4788500024400815 | 32151.0 |
| 5 | 5:94000377_CT_C  | 94000377 | CT  | C     | 4.32969448825642e-08   | 5.4768477448038695 | 32162.0 |
| 5 | rs17083887       | 94003296 | G   | A     | 4.3445075404239205e-08 | 5.4762430952682495 | 32153.0 |
| 5 | rs2220965        | 94003758 | G   | A     | 4.3445075404239205e-08 | 5.4762430952682495 | 32153.0 |
| 5 | rs72773547       | 94004908 | A   | C     | 4.3445075404239205e-08 | 5.4762430952682495 | 32153.0 |
| 5 | rs72773549       | 94005100 | T   | C     | 4.3445075404239205e-08 | 5.4762430952682495 | 32153.0 |
| 5 | rs17083888       | 94007823 | A   | G     | 4.3445075404239205e-08 | 5.4762430952682495 | 32153.0 |
| 5 | rs1124668        | 94013241 | T   | G     | 4.3445075404239205e-08 | 5.4762430952682495 | 32153.0 |
| 5 | rs67831380       | 94015736 | T   | G     | 4.3445075404239205e-08 | 5.4762430952682495 | 32153.0 |
| 5 | rs2270626        | 94024016 | G   | C     | 4.3445075404239205e-08 | 5.4762430952682495 | 32153.0 |
| 5 | rs2032813        | 94001252 | A   | G     | 4.662003306897137e-08  | 5.463742244618361  | 32173.0 |
| 5 | rs6556851        | 93993844 | G   | A     | 4.7241614353506325e-08 | 5.461391799312943  | 32170.0 |
| 5 | rs66696350       | 93994219 | C   | T     | 4.7241614353506325e-08 | 5.461391799312943  | 32170.0 |
| 5 | rs2132548        | 93996763 | T   | G     | 4.818322916965352e-08  | 5.457887676916075  | 32174.0 |
| 5 | rs2044911        | 93998902 | A   | T     | 4.818322916965352e-08  | 5.457887676916075  | 32174.0 |
| 5 | rs66483218       | 93988485 | G   | A     | 4.851861883658346e-08  | 5.456655572605651  | 32183.0 |
| 5 | rs12651956       | 94036583 | A   | G     | 4.868001267879463e-08  | 5.456065607480955  | 32146.0 |
| 5 | rs12655665       | 93992069 | C   | T     | 4.902116143185066e-08  | 5.4548247739043    | 32173.0 |
| 5 | rs7735659        | 93996182 | T   | A     | 4.9940132871793876e-08 | 5.4515234569137485 | 32174.0 |
| 6 | rs4262195        | 96929475 | T   | C     | 7.197157893193263e-09  | 5.786258158688043  | 32153.0 |
| 6 | rs144345632      | 96886894 | T   | TA    | 7.265397365586511e-09  | 5.784671947576885  | 32114.0 |
| 6 | rs11153023       | 96968525 | C   | T     | 8.185721475553405e-09  | 5.764588708368089  | 32165.0 |
| 6 | rs9398072        | 96911304 | T   | C     | 8.697501927762305e-09  | 5.754351502537402  | 32166.0 |
| 6 | rs11152952       | 96894303 | A   | G     | 8.705461725132107e-09  | 5.7541969521387655 | 32119.0 |
| 6 | rs11152953       | 96894305 | C   | T     | 8.705461725132107e-09  | 5.7541969521387655 | 32119.0 |
| 6 | rs12190520       | 96928620 | A   | C     | 9.019472416931042e-09  | 5.74820709855625   | 32155.0 |
| 6 | rs12201449       | 96959382 | C   | T     | 9.198334390044896e-09  | 5.7448852491926745 | 32165.0 |
| 6 | 6:96893385_CAG_C | 96893385 | CAG | C     | 9.519722964580184e-09  | 5.739071136566513  | 32099.0 |
| 6 | rs4078038        | 96904366 | T   | C     | 9.702708214008913e-09  | 5.7358454971722175 | 32172.0 |
| 6 | rs2472895        | 96870387 | A   | T     | 1.0008580127052474e-08 | 5.730583402676022  | 32178.0 |
| 6 | rs2499813        | 96875338 | T   | C     | 1.0008580127052474e-08 | 5.730583402676022  | 32178.0 |
| 6 | rs4486027        | 96911886 | T   | C     | 1.0346439624473771e-08 | 5.7249496916168425 | 32164.0 |
| 6 | rs4839837        | 96908706 | G   | A     | 1.0385649866645693e-08 | 5.724307488594034  | 32175.0 |
| 6 | rs9400016        | 96940883 | G   | T     | 1.1079938990910542e-08 | 5.713310276925482  | 32173.0 |
| 6 | rs2472884        | 96863965 | C   | T     | 1.1507933232072181e-08 | 5.706860040868146  | 32172.0 |
| 6 | rs12194971       | 96911073 | T   | C     | 1.171060621960076e-08  | 5.703886510920026  | 32176.0 |
| 6 | rs35487471       | 96879715 | C   | T     | 1.1961567516206782e-08 | 5.700273057167312  | 32185.0 |
| 6 | rs72931061       | 96880285 | G   | A     | 1.1961567516206782e-08 | 5.700273057167312  | 32185.0 |
| 6 | rs34209750       | 96882215 | G   | T     | 1.1961567516206782e-08 | 5.700273057167312  | 32185.0 |
| 6 | rs13207333       | 96882254 | T   | C     | 1.1961567516206782e-08 | 5.700273057167312  | 32185.0 |
| 6 | rs4486019        | 96883814 | T   | C     | 1.1961567516206782e-08 | 5.700273057167312  | 32185.0 |
| 6 | rs67996804       | 96884387 | C   | T     | 1.1961567516206782e-08 | 5.700273057167312  | 32185.0 |



|   |             |          |   |             |                        |                    |         |
|---|-------------|----------|---|-------------|------------------------|--------------------|---------|
| 6 | rs34236778  | 96884556 | C | A           | 1.1961567516206782e-08 | 5.700273057167312  | 32185.0 |
| 6 | rs11757063  | 96884886 | G | A           | 1.1961567516206782e-08 | 5.700273057167312  | 32185.0 |
| 6 | rs11752584  | 96884952 | C | A           | 1.1961567516206782e-08 | 5.700273057167312  | 32185.0 |
| 6 | rs11757102  | 96885073 | G | A           | 1.1961567516206782e-08 | 5.700273057167312  | 32185.0 |
| 6 | rs35035182  | 96885300 | T | C           | 1.1961567516206782e-08 | 5.700273057167312  | 32185.0 |
| 6 | rs35410524  | 96885405 | C | T           | 1.1961567516206782e-08 | 5.700273057167312  | 32185.0 |
| 6 | rs12208884  | 96885572 | G | A           | 1.1961567516206782e-08 | 5.700273057167312  | 32185.0 |
| 6 | rs13213297  | 96887569 | C | A           | 1.1961567516206782e-08 | 5.700273057167312  | 32185.0 |
| 6 | rs13202091  | 96887771 | T | C           | 1.1961567516206782e-08 | 5.700273057167312  | 32185.0 |
| 6 | rs140961595 | 96888323 | A | G           | 1.1961567516206782e-08 | 5.700273057167312  | 32185.0 |
| 6 | rs148083617 | 96888353 | A | T           | 1.1961567516206782e-08 | 5.700273057167312  | 32185.0 |
| 6 | rs12210834  | 96890407 | A | T           | 1.1961567516206782e-08 | 5.700273057167312  | 32185.0 |
| 6 | rs12205655  | 96891733 | T | A           | 1.1961567516206782e-08 | 5.700273057167312  | 32185.0 |
| 6 | rs12529248  | 96895377 | T | G           | 1.1961567516206782e-08 | 5.700273057167312  | 32185.0 |
| 6 | rs12213426  | 96896035 | T | C           | 1.1961567516206782e-08 | 5.700273057167312  | 32185.0 |
| 6 | rs12190507  | 96898265 | T | G           | 1.1961567516206782e-08 | 5.700273057167312  | 32185.0 |
| 6 | rs12190508  | 96898269 | T | C           | 1.1961567516206782e-08 | 5.700273057167312  | 32185.0 |
| 6 | rs34826652  | 96899085 | A | G           | 1.1961567516206782e-08 | 5.700273057167312  | 32185.0 |
| 6 | rs28623445  | 96899116 | G | T           | 1.1961567516206782e-08 | 5.700273057167312  | 32185.0 |
| 6 | rs11152959  | 96900272 | C | T           | 1.1961567516206782e-08 | 5.700273057167312  | 32185.0 |
| 6 | rs11152960  | 96900398 | A | G           | 1.1961567516206782e-08 | 5.700273057167312  | 32185.0 |
| 6 | rs12195315  | 96905711 | T | G           | 1.1961567516206782e-08 | 5.700273057167312  | 32185.0 |
| 6 | rs11152968  | 96908653 | C | T           | 1.1961567516206782e-08 | 5.700273057167312  | 32185.0 |
| 6 | rs11152969  | 96908712 | A | C           | 1.1961567516206782e-08 | 5.700273057167312  | 32185.0 |
| 6 | rs11152970  | 96909077 | A | G           | 1.1961567516206782e-08 | 5.700273057167312  | 32185.0 |
| 6 | rs13201795  | 96910471 | G | A           | 1.1961567516206782e-08 | 5.700273057167312  | 32185.0 |
| 6 | rs11153071  | 97039741 | G | A           | 1.2031878143044842e-08 | 5.699273900797943  | 31955.0 |
| 6 | rs2472888   | 96865501 | T | C           | 1.2138579228209842e-08 | 5.697768400114338  | 32178.0 |
| 6 | rs139140529 | 96903530 | T | TTCT<br>AAG | 1.2181069281380896e-08 | 5.69717246309208   | 32100.0 |
| 6 | rs12205728  | 96891838 | T | C           | 1.2354949615121169e-08 | 5.694754596811173  | 32183.0 |
| 6 | rs12193732  | 96942609 | G | A           | 1.2397830559683924e-08 | 5.6941634055785455 | 32175.0 |
| 6 | rs10447413  | 96943434 | G | C           | 1.2397830559683924e-08 | 5.6941634055785455 | 32175.0 |
| 6 | rs112107820 | 96943946 | C | T           | 1.2397830559683924e-08 | 5.6941634055785455 | 32175.0 |
| 6 | rs11153018  | 96956137 | G | A           | 1.2397830559683924e-08 | 5.6941634055785455 | 32175.0 |
| 6 | rs12208682  | 96921307 | G | C           | 1.2471364537930623e-08 | 5.693154216516754  | 32148.0 |
| 6 | rs146759159 | 96944004 | G | T           | 1.248943798966697e-08  | 5.6929070595212385 | 32171.0 |
| 6 | rs6921291   | 97066242 | C | T           | 1.2521483907412662e-08 | 5.692469680219324  | 32142.0 |
| 6 | rs2472889   | 96866803 | T | G           | 1.2927599343506168e-08 | 5.687019112494964  | 32186.0 |
| 6 | rs12199452  | 96880703 | G | A           | 1.3100215886116972e-08 | 5.68475260425986   | 32181.0 |
| 6 | rs11152951  | 96894135 | C | G           | 1.3282625382310893e-08 | 5.682388828096013  | 32164.0 |
| 6 | rs12203657  | 96883285 | G | A           | 1.3390986132219229e-08 | 5.6809995097169725 | 32186.0 |
| 6 | rs147506219 | 96889290 | C | A           | 1.3908048410642165e-08 | 5.6745170266471865 | 32186.0 |
| 6 | rs142957763 | 96890032 | G | A           | 1.3908048410642165e-08 | 5.6745170266471865 | 32186.0 |
| 6 | rs2472887   | 96865437 | A | G           | 1.390814693875232e-08  | 5.674515813842371  | 32186.0 |
| 6 | rs11417499  | 96866499 | C | CT          | 1.390814693875232e-08  | 5.674515813842371  | 32186.0 |
| 6 | rs2472890   | 96867646 | C | T           | 1.390814693875232e-08  | 5.674515813842371  | 32186.0 |
| 6 | rs2142652   | 96868504 | A | C           | 1.390814693875232e-08  | 5.674515813842371  | 32186.0 |
| 6 | rs2499809   | 96870110 | C | T           | 1.390814693875232e-08  | 5.674515813842371  | 32186.0 |
| 6 | rs2472897   | 96870569 | G | T           | 1.390814693875232e-08  | 5.674515813842371  | 32186.0 |
| 6 | rs2092095   | 96870864 | T | G           | 1.390814693875232e-08  | 5.674515813842371  | 32186.0 |
| 6 | rs2092096   | 96870919 | T | C           | 1.390814693875232e-08  | 5.674515813842371  | 32186.0 |
| 6 | rs2263192   | 96873037 | C | G           | 1.390814693875232e-08  | 5.674515813842371  | 32186.0 |
| 6 | rs1116113   | 96873586 | G | C           | 1.390814693875232e-08  | 5.674515813842371  | 32186.0 |
| 6 | rs2472904   | 96874962 | T | G           | 1.390814693875232e-08  | 5.674515813842371  | 32186.0 |

|   |            |          |   |    |                        |                    |         |
|---|------------|----------|---|----|------------------------|--------------------|---------|
| 6 | rs2472906  | 96875318 | G | T  | 1.390814693875232e-08  | 5.674515813842371  | 32186.0 |
| 6 | rs2472908  | 96875998 | A | T  | 1.390814693875232e-08  | 5.674515813842371  | 32186.0 |
| 6 | rs2472911  | 96877055 | A | G  | 1.390814693875232e-08  | 5.674515813842371  | 32186.0 |
| 6 | rs2499814  | 96877245 | C | T  | 1.390814693875232e-08  | 5.674515813842371  | 32186.0 |
| 6 | rs2499816  | 96878206 | C | T  | 1.390814693875232e-08  | 5.674515813842371  | 32186.0 |
| 6 | rs2499817  | 96878321 | C | T  | 1.390814693875232e-08  | 5.674515813842371  | 32186.0 |
| 6 | rs2472882  | 96863474 | C | T  | 1.3945242081251579e-08 | 5.674059793419876  | 32180.0 |
| 6 | rs2472883  | 96863817 | C | T  | 1.3945242081251579e-08 | 5.674059793419876  | 32180.0 |
| 6 | rs2499807  | 96864053 | T | G  | 1.3945242081251579e-08 | 5.674059793419876  | 32180.0 |
| 6 | rs1303852  | 96864523 | C | T  | 1.3945242081251579e-08 | 5.674059793419876  | 32180.0 |
| 6 | rs2179126  | 96871350 | A | G  | 1.4353955417355738e-08 | 5.6691119544594955 | 32185.0 |
| 6 | rs2142653  | 96871520 | C | A  | 1.4353955417355738e-08 | 5.6691119544594955 | 32185.0 |
| 6 | rs12213375 | 96902134 | A | G  | 1.4527125929726536e-08 | 5.6670567264151845 | 32183.0 |
| 6 | rs75303492 | 96902999 | G | A  | 1.4527125929726536e-08 | 5.6670567264151845 | 32183.0 |
| 6 | rs12208449 | 96903253 | C | T  | 1.4527125929726536e-08 | 5.6670567264151845 | 32183.0 |
| 6 | rs12191653 | 96903898 | T | C  | 1.4527125929726536e-08 | 5.6670567264151845 | 32183.0 |
| 6 | rs12210146 | 96903962 | C | T  | 1.4527125929726536e-08 | 5.6670567264151845 | 32183.0 |
| 6 | rs4077932  | 96905144 | C | T  | 1.4527125929726536e-08 | 5.6670567264151845 | 32183.0 |
| 6 | rs11755945 | 96908038 | G | C  | 1.4527125929726536e-08 | 5.6670567264151845 | 32183.0 |
| 6 | rs2499804  | 96861216 | T | C  | 1.4558212639347637e-08 | 5.666690303298651  | 32185.0 |
| 6 | rs2472881  | 96862562 | C | T  | 1.4558212639347637e-08 | 5.666690303298651  | 32185.0 |
| 6 | rs2205755  | 96864704 | A | G  | 1.4558212639347637e-08 | 5.666690303298651  | 32185.0 |
| 6 | rs2472886  | 96864876 | C | T  | 1.4558212639347637e-08 | 5.666690303298651  | 32185.0 |
| 6 | rs2472893  | 96870048 | G | C  | 1.4558418728947923e-08 | 5.666687876630551  | 32186.0 |
| 6 | rs2273622  | 97058567 | A | G  | 1.477671313042931e-08  | 5.664136053485628  | 32150.0 |
| 6 | rs34242766 | 96872828 | C | CA | 1.5226315407558652e-08 | 5.658993688649467  | 32146.0 |
| 6 | rs9373978  | 97056255 | T | C  | 1.5834026921500586e-08 | 5.652272530960173  | 32110.0 |
| 6 | rs13208422 | 96892119 | C | T  | 1.725020750039938e-08  | 5.637534478157657  | 32184.0 |
| 6 | rs2472880  | 96860130 | G | A  | 1.7356835917286702e-08 | 5.636472875880543  | 32183.0 |
| 6 | rs6568443  | 96944473 | T | C  | 1.790265237875031e-08  | 5.631135960121127  | 32167.0 |
| 6 | rs2499801  | 96854594 | G | A  | 1.8047232473831608e-08 | 5.629748746361807  | 32086.0 |
| 6 | rs760619   | 96857431 | A | G  | 1.8514990807853505e-08 | 5.625333507415743  | 32088.0 |
| 6 | rs12208011 | 96991105 | G | A  | 1.855808724781166e-08  | 5.624932178739016  | 32183.0 |
| 6 | rs10457159 | 96993139 | G | A  | 1.855808724781166e-08  | 5.624932178739016  | 32183.0 |
| 6 | rs3734238  | 96996228 | A | T  | 1.855808724781166e-08  | 5.624932178739016  | 32183.0 |
| 6 | rs3734239  | 96996244 | A | G  | 1.855808724781166e-08  | 5.624932178739016  | 32183.0 |
| 6 | rs34756237 | 96854540 | T | TA | 1.9584276538476583e-08 | 5.615634042668363  | 31913.0 |
| 6 | rs6916232  | 96985959 | A | T  | 1.98633142548538e-08   | 5.6131875166612994 | 32185.0 |
| 6 | rs12204342 | 97054314 | G | T  | 2.0153973680185632e-08 | 5.6106743237043295 | 32142.0 |
| 6 | rs4265039  | 96878929 | T | C  | 2.0804598821952385e-08 | 5.6051738887070055 | 32172.0 |
| 6 | rs4346856  | 96880270 | C | T  | 2.0804598821952385e-08 | 5.6051738887070055 | 32172.0 |
| 6 | rs2064947  | 97052754 | C | T  | 2.1775426464067423e-08 | 5.5972693493090775 | 32149.0 |
| 6 | rs926276   | 96868735 | C | T  | 2.19305046288764e-08   | 5.596038480336651  | 32168.0 |
| 6 | rs12190397 | 97036465 | G | A  | 2.236447747255332e-08  | 5.592638382776396  | 32090.0 |
| 6 | rs12212614 | 97036466 | T | G  | 2.236447747255332e-08  | 5.592638382776396  | 32090.0 |
| 6 | rs12530462 | 97053514 | C | T  | 2.2537978021701546e-08 | 5.5912969273839925 | 32148.0 |
| 6 | rs4343922  | 96876903 | C | T  | 2.2554593152867565e-08 | 5.591168990433197  | 32177.0 |
| 6 | rs9486205  | 96877006 | C | T  | 2.2554593152867565e-08 | 5.591168990433197  | 32177.0 |
| 6 | rs13206547 | 97006942 | T | C  | 2.2677282321877e-08    | 5.5902271027116175 | 32173.0 |
| 6 | rs34051754 | 97007754 | A | T  | 2.2677282321877e-08    | 5.5902271027116175 | 32173.0 |
| 6 | rs4839826  | 96853616 | C | T  | 2.3026096257317047e-08 | 5.587576026554098  | 31993.0 |
| 6 | rs6568392  | 96861476 | G | T  | 2.334158356131465e-08  | 5.585211601603699  | 32167.0 |
| 6 | rs11153064 | 97021959 | A | G  | 2.3427604148388207e-08 | 5.584572300224953  | 32171.0 |
| 6 | rs3798294  | 97049587 | G | A  | 2.3681224256591145e-08 | 5.582700582505454  | 32147.0 |

|    |                             |           |                |     |                        |                    |         |
|----|-----------------------------|-----------|----------------|-----|------------------------|--------------------|---------|
| 6  | rs3798289                   | 97023632  | T              | C   | 2.373266964839396e-08  | 5.582323289810205  | 32170.0 |
| 6  | rs11153059                  | 97014537  | T              | A   | 2.460685785323787e-08  | 5.576030658261048  | 32173.0 |
| 6  | rs11153058                  | 97012746  | C              | T   | 2.4852172545471726e-08 | 5.574303791896439  | 32172.0 |
| 6  | rs12527021                  | 97025496  | C              | T   | 2.4960861963575042e-08 | 5.5735439668401465 | 32168.0 |
| 6  | rs13210597                  | 96969694  | C              | A   | 2.5270349098967107e-08 | 5.5713978666438475 | 32163.0 |
| 6  | 6:96969558_GAACCCCGGCGGTC_G | 96969558  | GAACCCCGGCGGTC | G   | 2.546993140628335e-08  | 5.5700273751407945 | 31983.0 |
| 6  | rs74221529                  | 28680690  | T              | TA  | 2.5578582020377243e-08 | 5.569285668093932  | 26930.0 |
| 6  | rs12214469                  | 97019471  | G              | T   | 2.588914007725708e-08  | 5.567182371548926  | 32167.0 |
| 6  | rs12204068                  | 97036201  | C              | T   | 2.715992078432288e-08  | 5.558823479990467  | 32152.0 |
| 6  | rs142257404                 | 96984849  | C              | CAT | 2.7337396308392496e-08 | 5.557686409026506  | 32184.0 |
| 6  | rs6920913                   | 96874297  | A              | G   | 2.773218233667587e-08  | 5.555182523792388  | 32133.0 |
| 6  | rs35300731                  | 96875349  | C              | CG  | 2.8015140473871862e-08 | 5.5534090831918    | 31950.0 |
| 6  | rs9386648                   | 97035656  | T              | C   | 2.8240681141498203e-08 | 5.55200791068886   | 32154.0 |
| 6  | rs11153067                  | 97039421  | A              | T   | 2.9214986240355743e-08 | 5.5460772061806205 | 32151.0 |
| 6  | rs12207570                  | 96987884  | T              | G   | 2.9302218257178866e-08 | 5.545555611034255  | 32186.0 |
| 6  | rs2145535                   | 97034715  | G              | A   | 3.0028283296374926e-08 | 5.541271727635776  | 32160.0 |
| 6  | rs12208556                  | 96903486  | C              | T   | 3.010749273870184e-08  | 5.540810475747254  | 32138.0 |
| 6  | rs11756315                  | 97008678  | G              | A   | 3.0828040605419376e-08 | 5.53666784150109   | 32171.0 |
| 6  | rs200992455                 | 97062117  | ATAAT          | A   | 3.2025135601595215e-08 | 5.529988733165904  | 32017.0 |
| 6  | rs12197411                  | 97039621  | G              | A   | 3.2446103467552235e-08 | 5.5276974123837705 | 32141.0 |
| 6  | rs12525695                  | 97039818  | G              | A   | 3.2638826886894314e-08 | 5.526658029593632  | 32154.0 |
| 6  | rs9486719                   | 97060124  | G              | A   | 3.3077140760372865e-08 | 5.524316140774461  | 32110.0 |
| 6  | rs10872018                  | 97026429  | G              | A   | 3.4254891477899416e-08 | 5.518169522648507  | 32167.0 |
| 6  | rs12208124                  | 97027942  | C              | T   | 3.44466263923172e-08   | 5.517188315395654  | 32165.0 |
| 6  | rs13202675                  | 97028427  | C              | T   | 3.44466263923172e-08   | 5.517188315395654  | 32165.0 |
| 6  | rs3798296                   | 97052286  | G              | A   | 3.5278327315430915e-08 | 5.512992498942244  | 32156.0 |
| 6  | rs4839833                   | 96882069  | T              | C   | 3.64093221337398e-08   | 5.507438172353678  | 32174.0 |
| 6  | rs3798295                   | 97052164  | C              | T   | 3.663348218542855e-08  | 5.506357216704617  | 32158.0 |
| 6  | rs6923212                   | 97061940  | T              | C   | 3.702689707644587e-08  | 5.504475488604517  | 32119.0 |
| 6  | rs3906199                   | 97049899  | C              | A   | 3.833782203423869e-08  | 5.49834228177656   | 32161.0 |
| 6  | rs6924957                   | 96853579  | G              | T   | 3.924372742845882e-08  | 5.4942216868363225 | 32009.0 |
| 6  | rs1157316                   | 96869710  | G              | A   | 4.113214715125233e-08  | 5.485920668072157  | 32172.0 |
| 6  | rs13208321                  | 96860354  | A              | G   | 4.195875327310651e-08  | 5.482402804707823  | 32137.0 |
| 6  | 6:96890391_AAC_A            | 96890391  | AAC            | A   | 4.649137291940286e-08  | 5.464232552773115  | 32089.0 |
| 6  | rs11751075                  | 97065751  | G              | A   | 4.776367978584963e-08  | 5.459440712187559  | 32118.0 |
| 6  | rs11759769                  | 97065212  | G              | A   | 4.843673574501173e-08  | 5.456955618924575  | 32121.0 |
| 10 | rs4880259                   | 134298687 | T              | C   | 4.508961432972106e-17  | 8.39884379292765   | 29501.0 |
| 10 | rs11146399                  | 134308479 | C              | T   | 5.503654932591339e-16  | 8.099828874727846  | 32033.0 |
| 10 | rs11146400                  | 134308575 | C              | T   | 5.579365481328456e-16  | 8.098166542010222  | 32035.0 |
| 10 | rs4469802                   | 134309194 | G              | A   | 7.732138798449122e-16  | 8.058365415682667  | 32022.0 |
| 10 | rs4880400                   | 134313795 | T              | C   | 1.0224780358603788e-15 | 8.024130209862609  | 32097.0 |
| 10 | rs11146401                  | 134313336 | C              | A   | 1.4602767365264618e-15 | 7.980258052331684  | 32120.0 |
| 10 | rs35974361                  | 134307547 | C              | G   | 1.5083154621191118e-15 | 7.976262038123653  | 32031.0 |
| 10 | rs4454641                   | 134307845 | C              | T   | 1.799713061243937e-15  | 7.954420903432577  | 32052.0 |
| 10 | rs796953214                 | 134309294 | ATT            | A   | 1.821553447497812e-15  | 7.952927234292401  | 31784.0 |
| 10 | rs35263482                  | 134313046 | G              | C   | 2.022029132986991e-15  | 7.9399867130618365 | 31992.0 |
| 10 | rs35133675                  | 134312857 | C              | T   | 2.406803752990105e-15  | 7.9183513913494785 | 32186.0 |
| 10 | 10:134312221_CACAA_C        | 134312221 | CACAA          | C   | 3.3161458194685373e-15 | 7.878394400038856  | 29589.0 |
| 10 | rs7915907                   | 134316231 | G              | A   | 5.788851709847463e-15  | 7.808465322329078  | 31962.0 |
| 10 | rs67221163                  | 134297909 | C              | G   | 6.552749215637474e-15  | 7.79282472369671   | 31711.0 |
| 10 | rs71481917                  | 134297801 | C              | T   | 7.883924929787514e-15  | 7.769431363381061  | 30916.0 |
| 10 | rs57472801                  | 134322756 | A              | G   | 9.539882660931271e-15  | 7.745243528791251  | 31745.0 |
| 10 | rs7897053                   | 134316342 | C              | T   | 1.7793118674599962e-14 | 7.665647546168928  | 31956.0 |

|    |                   |           |    |    |                        |                    |         |
|----|-------------------|-----------|----|----|------------------------|--------------------|---------|
| 10 | rs7917322         | 134306694 | A  | C  | 1.8653002955682653e-14 | 7.659588324802858  | 31090.0 |
| 10 | rs4356146         | 134324520 | G  | A  | 2.093333047833664e-14  | 7.644761295339781  | 31724.0 |
| 10 | rs11187838        | 96038686  | G  | A  | 4.2917313033974e-14    | 7.551833440068696  | 32147.0 |
| 10 | rs2274224         | 96039597  | G  | C  | 5.049986986642375e-14  | 7.530620223036226  | 32186.0 |
| 10 | rs7084359         | 134297562 | A  | C  | 5.877560539023701e-14  | 7.51078109325326   | 31837.0 |
| 10 | rs57866767        | 96023077  | T  | C  | 6.855622855055232e-14  | 7.490606197873143  | 32139.0 |
| 10 | rs3891783         | 96015793  | C  | G  | 6.894184578704718e-14  | 7.489870037653303  | 32139.0 |
| 10 | rs10786156        | 96014622  | C  | G  | 7.468100049579422e-14  | 7.479367788191028  | 32139.0 |
| 10 | rs7083220         | 134284485 | G  | A  | 8.010723377127049e-14  | 7.470143795428133  | 32155.0 |
| 10 | rs9645539         | 134282867 | G  | T  | 9.598010224717971e-14  | 7.446319635920517  | 31875.0 |
| 10 | rs11819412        | 134297803 | G  | C  | 9.847909623093286e-14  | 7.442926218060664  | 31133.0 |
| 10 | rs10735665        | 134308936 | G  | A  | 1.043280898859151e-13  | 7.435303572358428  | 32018.0 |
| 10 | rs11146402        | 134323354 | C  | G  | 1.1676556619761485e-13 | 7.42040178792245   | 31717.0 |
| 10 | 10:96026184_CA_C  | 96026184  | CA | C  | 1.2073208668189555e-13 | 7.4159763034235775 | 31917.0 |
| 10 | rs12762160        | 134330662 | C  | T  | 1.2559451019952514e-13 | 7.410742211508107  | 31313.0 |
| 10 | rs11379033        | 134325396 | C  | CA | 1.478293105137883e-13  | 7.389096989850744  | 31120.0 |
| 10 | rs11596664        | 134280157 | C  | T  | 1.482216672420236e-13  | 7.38874450194884   | 31747.0 |
| 10 | rs10747062        | 134285515 | C  | T  | 1.485203015482186e-13  | 7.3884768269320675 | 32132.0 |
| 10 | rs10747061        | 134285403 | G  | A  | 2.1826563960480998e-13 | 7.337103612380594  | 32156.0 |
| 10 | rs10781576        | 134285017 | T  | C  | 2.19278175959502e-13   | 7.336483900656723  | 32186.0 |
| 10 | rs11146393        | 134299369 | G  | C  | 2.405872474501524e-13  | 7.324055423314602  | 31763.0 |
| 10 | rs61861415        | 134328497 | T  | C  | 2.5388030908469136e-13 | 7.3168389114944015 | 31385.0 |
| 10 | rs200898494       | 134299394 | A  | AG | 3.1172050039237527e-13 | 7.289234747996606  | 31465.0 |
| 10 | rs4880397         | 134309321 | C  | G  | 3.11869145734844e-13   | 7.289170511538463  | 32036.0 |
| 10 | rs10870313        | 134310920 | A  | G  | 3.156833903200461e-13  | 7.287532405802485  | 31965.0 |
| 10 | rs11814088        | 134298002 | A  | C  | 3.1840617023815953e-13 | 7.286374900040142  | 31820.0 |
| 10 | rs10870314        | 134310923 | T  | G  | 3.765233955795692e-13  | 7.263742888352753  | 31955.0 |
| 10 | rs7080018         | 134301505 | G  | A  | 5.410387895424326e-13  | 7.214571989497416  | 31929.0 |
| 10 | rs4492738         | 134300136 | T  | C  | 5.933744352233561e-13  | 7.201995978071093  | 31939.0 |
| 10 | rs4592360         | 134300069 | A  | G  | 5.963998680296833e-13  | 7.2013026833470475 | 31937.0 |
| 10 | rs4309079         | 134300091 | C  | T  | 6.260333474957793e-13  | 7.194688911191922  | 31934.0 |
| 10 | rs7903563         | 134300816 | G  | A  | 7.435485968066305e-13  | 7.1711785352399655 | 31943.0 |
| 10 | rs4880396         | 134298833 | T  | C  | 7.460960526637285e-13  | 7.170710360150287  | 31766.0 |
| 10 | rs4501914         | 134308062 | C  | T  | 7.574386324413606e-13  | 7.168644673091168  | 32186.0 |
| 10 | rs11146395        | 134299444 | T  | C  | 7.825654384829695e-13  | 7.1641747216956935 | 31752.0 |
| 10 | rs4293055         | 134323744 | G  | A  | 8.019254548016124e-13  | 7.1608257231068215 | 31495.0 |
| 10 | rs543302184       | 96009182  | T  | TA | 1.324066465091119e-12  | 7.091770832009837  | 30691.0 |
| 10 | rs7080472         | 96012950  | G  | T  | 1.484423407411613e-12  | 7.075936955168742  | 31940.0 |
| 10 | rs7096828         | 134301541 | C  | T  | 1.5309795102694828e-12 | 7.071653836089679  | 31966.0 |
| 10 | rs7914305         | 134312761 | C  | T  | 1.652873068056089e-12  | 7.061017893580643  | 31964.0 |
| 10 | rs61861416        | 134333189 | T  | A  | 2.0093864012123997e-12 | 7.033830894274732  | 30952.0 |
| 10 | rs11596632        | 134279989 | C  | A  | 2.0632144190394627e-12 | 7.0301433586987425 | 31517.0 |
| 10 | rs7918535         | 134300351 | A  | G  | 2.1668849492925253e-12 | 7.023299840532359  | 31951.0 |
| 10 | rs7897891         | 134284005 | T  | C  | 2.9129910699348014e-12 | 6.981859149156841  | 31712.0 |
| 10 | 10:134303087_AG_A | 134303087 | AG | A  | 2.9544155561831077e-12 | 6.979875597084392  | 31783.0 |
| 10 | rs12572574        | 134281065 | C  | T  | 3.132384377583428e-12  | 6.9716529838953205 | 31599.0 |
| 10 | rs7917077         | 134305875 | T  | A  | 3.742350590645925e-12  | 6.946584784492347  | 31441.0 |
| 10 | rs7914354         | 134334476 | A  | G  | 3.796200835261439e-12  | 6.944568039094263  | 30876.0 |
| 10 | rs4593926         | 134281537 | A  | G  | 4.045781625797275e-12  | 6.935572911887697  | 31491.0 |
| 10 | rs34102287        | 134331173 | C  | T  | 4.702499223453563e-12  | 6.914278684473759  | 30935.0 |
| 10 | rs10870316        | 134321788 | G  | A  | 4.8995817747026744e-12 | 6.908455630628014  | 31837.0 |
| 10 | rs10870317        | 134321883 | G  | C  | 5.3143179118716205e-12 | 6.896917082362893  | 31833.0 |
| 10 | rs10747060        | 134285007 | A  | G  | 5.426028775359202e-12  | 6.893959998599807  | 31841.0 |
| 10 | rs11591553        | 134323564 | G  | A  | 5.5975357092005364e-12 | 6.8895342248941205 | 31722.0 |

|    |             |           |        |    |                        |                    |         |
|----|-------------|-----------|--------|----|------------------------|--------------------|---------|
| 10 | rs7090098   | 134320629 | G      | A  | 5.971001940904423e-12  | 6.880339658270646  | 31864.0 |
| 10 | rs71503747  | 134304818 | C      | T  | 5.997122655095898e-12  | 6.879717837933923  | 30316.0 |
| 10 | rs4497325   | 134302745 | G      | A  | 6.353751246874942e-12  | 6.871483790556253  | 32050.0 |
| 10 | rs5025116   | 134320913 | C      | T  | 6.50461582493483e-12   | 6.868136083827987  | 31854.0 |
| 10 | rs61861413  | 134326732 | G      | A  | 7.367172859675429e-12  | 6.850345715835326  | 31664.0 |
| 10 | rs10735666  | 134322595 | C      | A  | 8.071625049381277e-12  | 6.8372704950253045 | 31637.0 |
| 10 | rs11146397  | 134303122 | T      | C  | 8.307068403221574e-12  | 6.833148843921718  | 32143.0 |
| 10 | rs10747063  | 134317884 | C      | T  | 1.0237974201001445e-11 | 6.803116565445973  | 31848.0 |
| 10 | rs7086785   | 134316795 | T      | C  | 1.1307133896980027e-11 | 6.78879836458131   | 31909.0 |
| 10 | rs10870315  | 134316622 | A      | G  | 1.141522006620805e-11  | 6.787425462792664  | 31889.0 |
| 10 | rs139032047 | 134304807 | C      | A  | 1.3152606812709075e-11 | 6.766949379012942  | 29973.0 |
| 10 | rs71503746  | 134304802 | G      | A  | 1.3219783080215665e-11 | 6.766211963506348  | 29797.0 |
| 10 | rs10781577  | 134325083 | G      | T  | 1.3418596867656795e-11 | 6.764050832741418  | 31588.0 |
| 10 | rs11146398  | 134303274 | T      | C  | 1.3469926177200972e-11 | 6.763497970450421  | 32186.0 |
| 10 | rs7894289   | 134305663 | G      | A  | 2.275826163692291e-11  | 6.687134553866423  | 30701.0 |
| 10 | rs7093232   | 134303666 | G      | A  | 2.530307144250132e-11  | 6.671599266352523  | 32037.0 |
| 10 | rs79361141  | 134304808 | C      | A  | 2.5735232153973962e-11 | 6.669113986323622  | 30417.0 |
| 10 | rs10747064  | 134322499 | C      | T  | 3.580626510439153e-11  | 6.62046831942667   | 31669.0 |
| 10 | rs11187844  | 96056629  | C      | A  | 7.449547612740312e-11  | 6.511315526300487  | 31901.0 |
| 10 | rs7907962   | 134287486 | A      | G  | 7.866417789894608e-11  | 6.503133018285553  | 30475.0 |
| 10 | rs71503745  | 134304757 | C      | A  | 8.617597876540119e-11  | 6.489405080311924  | 29932.0 |
| 10 | rs35364222  | 134296800 | T      | C  | 9.152344500176895e-11  | 6.480327983588389  | 31866.0 |
| 10 | rs7904728   | 134295644 | G      | A  | 1.385228174250261e-10  | 6.417508291801415  | 32120.0 |
| 10 | rs4344410   | 134294911 | C      | A  | 4.89945396730622e-10   | 6.222291581631027  | 32016.0 |
| 10 | rs7923337   | 134295750 | A      | T  | 5.722881646151891e-10  | 6.197879803253204  | 32133.0 |
| 10 | rs10747068  | 134335157 | A      | G  | 8.130444520354161e-10  | 6.142359772913839  | 28423.0 |
| 10 | rs7095973   | 134324510 | T      | C  | 8.393782519584108e-10  | 6.137296144650871  | 31678.0 |
| 10 | rs753724    | 96051417  | G      | T  | 8.474703943185124e-10  | 6.13577123017936   | 32180.0 |
| 10 | rs11187840  | 96050351  | A      | G  | 8.991669143104533e-10  | 6.126352131568465  | 32163.0 |
| 10 | rs12220091  | 96053689  | C      | T  | 1.0664123647871142e-09 | 6.099139106994366  | 32182.0 |
| 10 | rs75017201  | 96055152  | C      | T  | 1.0664123647871142e-09 | 6.099139106994366  | 32182.0 |
| 10 | rs3740365   | 96053239  | T      | A  | 1.0974119598630194e-09 | 6.094556606071854  | 32183.0 |
| 10 | rs769015184 | 96049708  | AC     | A  | 1.3089632122842845e-09 | 6.066292902156383  | 32140.0 |
| 10 | rs3781266   | 96052747  | A      | G  | 1.3681948132374006e-09 | 6.05917734265741   | 32182.0 |
| 10 | rs11187842  | 96052511  | C      | T  | 2.1051480825203594e-09 | 5.989478615108893  | 32186.0 |
| 10 | rs4485028   | 134286588 | A      | G  | 2.207540188100426e-09  | 5.9817491836361825 | 30571.0 |
| 10 | rs4523616   | 134286571 | T      | C  | 2.348132108810336e-09  | 5.97168664910004   | 30612.0 |
| 10 | rs4509684   | 134286579 | C      | T  | 2.3661538095337906e-09 | 5.97043945428576   | 30614.0 |
| 10 | rs4486544   | 134294345 | T      | C  | 2.742066681100417e-09  | 5.946338585361418  | 31672.0 |
| 10 | rs11146404  | 134326869 | A      | G  | 2.870438404284808e-09  | 5.938841139382259  | 31523.0 |
| 10 | rs4412685   | 134294337 | A      | G  | 2.886947059474323e-09  | 5.937900754646733  | 31669.0 |
| 10 | rs3740360   | 96025491  | A      | C  | 3.0584526883104308e-09 | 5.928429715535812  | 32179.0 |
| 10 | rs17109875  | 96026575  | T      | C  | 3.0584526883104308e-09 | 5.928429715535812  | 32179.0 |
| 10 | rs12360525  | 134289214 | A      | T  | 3.133292905811434e-09  | 5.924457887070626  | 31503.0 |
| 10 | rs760730420 | 134288420 | ATTAAG | A  | 3.32579742244662e-09   | 5.9146511312185615 | 31180.0 |
| 10 | rs11187837  | 96035980  | T      | C  | 3.5910208638460205e-09 | 5.9020087628729465 | 32186.0 |
| 10 | rs10747067  | 134332633 | C      | G  | 6.378609435107791e-09  | 5.806516224210881  | 31006.0 |
| 10 | rs4576738   | 134294398 | G      | A  | 6.393412599686308e-09  | 5.806127912051996  | 31548.0 |
| 10 | rs2077218   | 96071561  | G      | A  | 7.2919590692838575e-09 | 5.784058440926818  | 31871.0 |
| 10 | rs11187845  | 96060198  | C      | A  | 7.771044273502751e-09  | 5.773350746165256  | 32182.0 |
| 10 | rs11146388  | 134288095 | G      | A  | 7.924842405929412e-09  | 5.770049130831633  | 31467.0 |
| 10 | rs200197176 | 96055963  | C      | CA | 7.951285316975931e-09  | 5.769487759590603  | 32010.0 |
| 10 | rs10781575  | 134280542 | C      | T  | 8.547751317426325e-09  | 5.7572850348932265 | 30144.0 |
| 10 | rs11187847  | 96063440  | C      | G  | 8.796288004349406e-09  | 5.7524430980208985 | 32165.0 |

|    |                     |           |       |    |                        |                    |         |
|----|---------------------|-----------|-------|----|------------------------|--------------------|---------|
| 10 | rs12217792          | 96062386  | T     | C  | 8.922820878887288e-09  | 5.750028874857671  | 32173.0 |
| 10 | rs11146389          | 134290675 | T     | G  | 9.792243886330027e-09  | 5.734288659530687  | 32186.0 |
| 10 | rs4242719           | 134290895 | T     | C  | 9.959870496461384e-09  | 5.731410829458055  | 32180.0 |
| 10 | rs372868680         | 134304572 | G     | A  | 1.0336874123084594e-08 | 5.725106718615635  | 26110.0 |
| 10 | rs4880382           | 134290769 | A     | G  | 1.0380865178548989e-08 | 5.724385728018667  | 32184.0 |
| 10 | rs35908501          | 134290607 | C     | T  | 1.0518954378181126e-08 | 5.7221416554067055 | 32180.0 |
| 10 | rs10870311          | 134290526 | C     | A  | 1.1422431492958501e-08 | 5.708129777089063  | 32175.0 |
| 10 | rs10870312          | 134290544 | C     | A  | 1.1453698624559652e-08 | 5.707664379311956  | 32176.0 |
| 10 | rs10870310          | 134290153 | G     | A  | 1.2125665747339857e-08 | 5.6979499176098365 | 32154.0 |
| 10 | rs10747058          | 134276427 | G     | T  | 1.2153216817882458e-08 | 5.697562874544871  | 31302.0 |
| 10 | rs4880390           | 134296740 | T     | G  | 1.2898808534548391e-08 | 5.6874000034344565 | 31928.0 |
| 10 | rs11816277          | 134296796 | A     | G  | 1.2952465406306794e-08 | 5.686690807100817  | 31938.0 |
| 10 | rs7898918           | 134276762 | G     | A  | 1.3651981715908724e-08 | 5.6776975548434745 | 31568.0 |
| 10 | rs4880258           | 134293640 | G     | A  | 1.3769274930651107e-08 | 5.6762335604193686 | 31927.0 |
| 10 | rs56094089          | 134289658 | T     | C  | 1.4654100512552693e-08 | 5.665564829395205  | 31787.0 |
| 10 | rs7096883           | 96069149  | G     | A  | 1.4776857383835465e-08 | 5.664134379326696  | 32171.0 |
| 10 | rs4880385           | 134296241 | C     | T  | 1.4823078792702371e-08 | 5.663598764240249  | 32186.0 |
| 10 | rs4880383           | 134295388 | T     | G  | 1.6702462516060403e-08 | 5.643090363620527  | 32150.0 |
| 10 | rs4880381           | 134289543 | A     | T  | 1.9049440232855808e-08 | 5.620419441253746  | 31764.0 |
| 10 | rs12771233          | 134291950 | C     | T  | 1.927591563531653e-08  | 5.618377347359412  | 31980.0 |
| 10 | rs4880384           | 134295412 | A     | G  | 2.1428391460668057e-08 | 5.600054912798445  | 32163.0 |
| 10 | rs12358548          | 134273093 | T     | A  | 2.7301359692661493e-08 | 5.557916711914437  | 32083.0 |
| 10 | rs10787738          | 118777371 | C     | T  | 3.4236147452205936e-08 | 5.518265731247902  | 30800.0 |
| 11 | rs11218557          | 122099839 | T     | C  | 1.2464323864899471e-08 | 5.693250592916878  | 31941.0 |
| 11 | rs10892820          | 122120972 | T     | G  | 1.38594196355121e-08   | 5.675116630254277  | 31716.0 |
| 11 | rs4127499           | 122176383 | G     | A  | 1.965344634739912e-08  | 5.615024440812554  | 32186.0 |
| 11 | rs10892823          | 122128720 | T     | G  | 2.4543313926902302e-08 | 5.5764806933890165 | 31750.0 |
| 11 | rs17337676          | 122132835 | G     | A  | 2.6847885743111573e-08 | 5.560840257902767  | 31754.0 |
| 11 | rs10750202          | 122133372 | A     | G  | 3.9934397271703946e-08 | 5.491141618547697  | 31756.0 |
| 11 | rs10892822          | 122124710 | C     | T  | 4.686732286065681e-08  | 5.462803525844152  | 31759.0 |
| 14 | rs186347            | 59072226  | G     | T  | 2.088812305545398e-11  | 6.6996766444809115 | 31582.0 |
| 14 | rs160459            | 59074136  | A     | C  | 3.009831399689939e-11  | 6.6460890809515245 | 32186.0 |
| 14 | rs160458            | 59074878  | T     | C  | 7.369881980320526e-11  | 6.5129300836411925 | 31575.0 |
| 14 | rs160460            | 59072964  | A     | G  | 1.8501390581295992e-10 | 6.373291369079907  | 31654.0 |
| 14 | rs10782438          | 59072144  | T     | C  | 1.139520201158146e-09  | 6.088530116890116  | 31609.0 |
| 14 | rs468213            | 59071100  | C     | G  | 2.1961397723828772e-09 | 5.982592306756784  | 31522.0 |
| 14 | rs170239            | 59064739  | C     | T  | 2.4584735860110557e-09 | 5.964192110128144  | 31447.0 |
| 14 | rs149142            | 59071725  | T     | C  | 2.880563469249779e-09  | 5.938263761505443  | 31601.0 |
| 14 | rs221326            | 59069053  | G     | T  | 6.285716910176658e-09  | 5.808973146903211  | 31543.0 |
| 14 | rs183400            | 59064730  | C     | T  | 4.6060415643556655e-08 | 5.465884514618648  | 31430.0 |
| 15 | rs1440802           | 39635124  | T     | C  | 1.003264426053347e-31  | 11.720291283567304 | 32084.0 |
| 15 | rs530653020         | 39633074  | T     | TA | 4.089044471473289e-31  | 11.60066166457904  | 32111.0 |
| 15 | rs5812099           | 39633877  | A     | AG | 5.030460954055212e-31  | 11.582917079319868 | 32142.0 |
| 15 | rs17694988          | 39636227  | T     | C  | 5.0592061130992065e-31 | 11.582428729203016 | 32107.0 |
| 15 | rs71471500          | 39632013  | C     | G  | 7.394326587208771e-31  | 11.549857115153193 | 32137.0 |
| 15 | rs7182018           | 39632269  | A     | G  | 7.395323097815078e-31  | 11.549845533223973 | 32138.0 |
| 15 | rs1080066           | 39634222  | A     | G  | 1.6492128982617422e-30 | 11.480709647945735 | 32186.0 |
| 15 | rs2033939           | 39633904  | G     | A  | 1.8508740402272843e-30 | 11.470731791569252 | 32152.0 |
| 15 | rs11639391          | 39631771  | C     | T  | 3.915485110331933e-30  | 11.405714632088108 | 32132.0 |
| 15 | rs4924345           | 39639898  | A     | C  | 3.761294813836875e-29  | 11.207145251213028 | 31998.0 |
| 15 | rs4924346           | 39639992  | G     | A  | 3.8360538262484317e-29 | 11.205402673043961 | 31978.0 |
| 15 | 15:39640223_TTAAA_T | 39640223  | TTAAA | T  | 5.480639751552537e-28  | 10.967432850121407 | 31741.0 |
| 15 | rs550614297         | 39640378  | G     | GA | 8.798646845869065e-28  | 10.924538566330936 | 31531.0 |
| 15 | rs28520337          | 39647894  | T     | C  | 5.317029944391902e-24  | 10.103748107662494 | 31643.0 |

|    |                   |          |       |              |                        |                    |         |
|----|-------------------|----------|-------|--------------|------------------------|--------------------|---------|
| 15 | rs574500639       | 39632734 | T     | TAC          | 2.762888912491769e-23  | 9.940910935884553  | 31822.0 |
| 15 | rs34680120        | 39664000 | C     | A            | 2.1600033993622744e-18 | 8.748608127196812  | 32140.0 |
| 15 | rs1837636         | 39661779 | C     | T            | 1.0057181932250956e-17 | 8.573287725237199  | 32186.0 |
| 15 | rs4566132         | 39661138 | G     | A            | 2.3385374914593398e-17 | 8.475608598799981  | 32159.0 |
| 15 | rs4923822         | 39662277 | A     | G            | 1.03855342042465e-15   | 8.022214778410742  | 32022.0 |
| 15 | rs11629938        | 39626935 | G     | A            | 1.610559054323356e-14  | 7.678425397017933  | 32071.0 |
| 15 | rs10520128        | 39627146 | G     | C            | 5.2713275909708294e-14 | 7.525017469153091  | 32066.0 |
| 15 | rs12591944        | 39627982 | A     | C            | 5.4820024315590295e-14 | 7.519895540148804  | 31996.0 |
| 15 | rs8025239         | 39623588 | G     | A            | 7.264782978334865e-14  | 7.482994668635992  | 32062.0 |
| 15 | rs12595360        | 39625987 | C     | G            | 1.0022316550340508e-13 | 7.440607703164034  | 31944.0 |
| 15 | 15:39625576_ACT_A | 39625576 | ACT   | A            | 1.2943951374925129e-13 | 7.406742428061791  | 31999.0 |
| 15 | rs72722978        | 39628675 | C     | T            | 1.9539972300765807e-13 | 7.351906333476349  | 31910.0 |
| 15 | rs4702            | 91426560 | G     | A            | 3.7705468908363357e-13 | 7.263552251032982  | 32186.0 |
| 15 | rs773225188       | 39631994 | AAGAG | A            | 6.594332253670534e-13  | 7.187593335651549  | 31403.0 |
| 15 | rs8032326         | 39619456 | C     | A            | 5.0360107939395915e-12 | 6.904557636537796  | 32186.0 |
| 15 | rs16968876        | 39636877 | C     | T            | 8.97969466977613e-12   | 6.821975559301237  | 31917.0 |
| 15 | rs6224            | 91423543 | G     | T            | 4.886248673375258e-11  | 6.574361197508928  | 31804.0 |
| 15 | rs11372849        | 91419432 | T     | TC           | 5.2979422210413684e-11 | 6.562313106986054  | 31414.0 |
| 15 | rs16968890        | 39638991 | G     | C            | 1.0066687469709907e-10 | 6.465946225660579  | 31948.0 |
| 15 | rs7183988         | 91428589 | T     | G            | 1.7658202163711128e-10 | 6.380438160280219  | 31955.0 |
| 15 | rs17514846        | 91416550 | C     | A            | 2.830281105954788e-10  | 6.30780082301566   | 31337.0 |
| 15 | rs2071382         | 91428197 | T     | C            | 3.276211975652744e-10  | 6.285110205864173  | 31970.0 |
| 15 | rs7177338         | 91428636 | G     | A            | 3.312961310757099e-10  | 6.283377100366999  | 31950.0 |
| 15 | rs1894401         | 91429042 | G     | A            | 3.503889036264062e-10  | 6.2746645453339776 | 31981.0 |
| 15 | rs8039305         | 91422543 | T     | C            | 5.634662823476524e-10  | 6.200325150671808  | 31771.0 |
| 15 | rs11539637        | 91428290 | C     | T            | 6.233674012213628e-10  | 6.184406010904782  | 31943.0 |
| 15 | rs8033007         | 39619661 | G     | C            | 7.09354584270465e-10   | 6.163987693333132  | 32158.0 |
| 15 | rs978740          | 39655920 | C     | T            | 7.122082397681491e-10  | 6.163352267873036  | 31831.0 |
| 15 | rs56113415        | 39621418 | G     | A            | 5.450276098992282e-09  | 5.832806501939312  | 32117.0 |
| 15 | rs11638016        | 39621773 | T     | C            | 5.732272021074552e-09  | 5.8243866704669145 | 32072.0 |
| 15 | rs3910644         | 39648234 | C     | T            | 7.87810735134866e-09   | 5.7710457641289965 | 31154.0 |
| 17 | rs62073094        | 44316219 | C     | T            | 2.13287849079083e-16   | 8.2143661529309    | 30258.0 |
| 17 | rs28434724        | 44312278 | A     | G            | 3.417830122355649e-16  | 8.157587303086428  | 30400.0 |
| 17 | 17:44270659_G_A   | 44270659 | G     | A            | 5.3690367959712e-16    | 8.102841047469974  | 31162.0 |
| 17 | rs9908639         | 44200192 | A     | G            | 7.269001835554949e-16  | 8.065913914756733  | 31520.0 |
| 17 | rs146895044       | 44166992 | A     | AAAA<br>TATG | 9.690427459411694e-16  | 8.030717476095408  | 31603.0 |
| 17 | 17:44266982_T_C   | 44266982 | T     | C            | 1.378355579070789e-15  | 7.987381037311898  | 31307.0 |
| 17 | rs2696461         | 44285844 | C     | T            | 4.1734793872419705e-15 | 7.8496055100203215 | 30674.0 |
| 17 | rs56807059        | 44189270 | A     | C            | 4.651963238220654e-15  | 7.835980972849088  | 31590.0 |
| 17 | rs11655181        | 44332093 | G     | A            | 4.7281277156267305e-15 | 7.833940453520714  | 30363.0 |
| 17 | rs2016034         | 44189598 | A     | G            | 5.448534290102809e-15  | 7.816099428898584  | 31452.0 |
| 17 | rs8068300         | 44202690 | T     | C            | 5.635245115901575e-15  | 7.811854818021024  | 31563.0 |
| 17 | 17:44224272_G_A   | 44224272 | G     | A            | 5.841373000630384e-15  | 7.807326664453987  | 31551.0 |
| 17 | rs2732634         | 44319047 | A     | G            | 6.12657229696107e-15   | 7.801314276785388  | 30344.0 |
| 17 | 17:44222424_G_C   | 44222424 | G     | C            | 6.883752693979011e-15  | 7.786598008032664  | 31556.0 |
| 17 | rs62073102        | 44319735 | C     | G            | 7.761565907087313e-15  | 7.771412545015654  | 30253.0 |
| 17 | rs8070420         | 44185479 | G     | T            | 8.077938286891876e-15  | 7.76635118980803   | 31610.0 |
| 17 | rs60521849        | 44172812 | G     | A            | 8.438923542335159e-15  | 7.760809138525095  | 31613.0 |
| 17 | rs2158258         | 44163809 | A     | C            | 9.194383518591518e-15  | 7.749929148398963  | 32174.0 |
| 17 | rs11079732        | 44161581 | T     | C            | 1.1688228860338078e-14 | 7.719395950440285  | 32174.0 |
| 17 | rs8065825         | 44175489 | A     | G            | 1.1700608596082432e-14 | 7.719261008151095  | 31614.0 |
| 17 | rs8064986         | 44119367 | A     | G            | 1.1816714426070542e-14 | 7.718002219102359  | 32132.0 |
| 17 | rs11652924        | 44182267 | T     | C            | 1.3278333333467694e-14 | 7.70312021510791   | 31588.0 |
| 17 | rs11654640        | 44162230 | G     | A            | 1.3310946129784842e-14 | 7.7028068721159295 | 32186.0 |

|    |                                           |          |                                   |    |                        |                    |         |
|----|-------------------------------------------|----------|-----------------------------------|----|------------------------|--------------------|---------|
| 17 | rs6503455                                 | 44140748 | C                                 | T  | 1.3783520164396154e-14 | 7.6983492636561985 | 32079.0 |
| 17 | rs9904766                                 | 44186952 | T                                 | C  | 1.3982135245140943e-14 | 7.696520523128266  | 31584.0 |
| 17 | rs72836329                                | 44161763 | C                                 | T  | 1.4045405462530557e-14 | 7.695943329908069  | 32133.0 |
| 17 | rs7521                                    | 44105395 | A                                 | G  | 1.4350380161318967e-14 | 7.693196551425887  | 31932.0 |
| 17 | rs7220988                                 | 44109474 | G                                 | A  | 1.4406409059492114e-14 | 7.692698174437496  | 32186.0 |
| 17 | rs35173354                                | 44212633 | T                                 | TA | 1.448100275080826e-14  | 7.69203761505191   | 31107.0 |
| 17 | rs143437112                               | 44222045 | T                                 | TA | 1.4776354172690798e-14 | 7.689454612264255  | 31219.0 |
| 17 | rs113564729                               | 44179095 | G                                 | A  | 1.888184334855864e-14  | 7.6580220776557075 | 31591.0 |
| 17 | 17:44329580_AT_A                          | 44329580 | AT                                | A  | 2.329237985971001e-14  | 7.6310087884511155 | 29428.0 |
| 17 | rs113042517                               | 44139453 | G                                 | A  | 2.3648050221099208e-14 | 7.62905512938946   | 32138.0 |
| 17 | 17:44291980_G_A                           | 44291980 | G                                 | A  | 2.7589075071189735e-14 | 7.609156391840178  | 30969.0 |
| 17 | rs11654745                                | 44131096 | G                                 | A  | 2.8072808355485715e-14 | 7.606909340756143  | 32146.0 |
| 17 | rs7213077                                 | 44119051 | T                                 | C  | 2.946716625002523e-14  | 7.600639175764982  | 32169.0 |
| 17 | rs8078067                                 | 44125466 | G                                 | A  | 3.0864487649235227e-14 | 7.594641853734182  | 32145.0 |
| 17 | 17:44236005_C_T                           | 44236005 | C                                 | T  | 3.1716502443640664e-14 | 7.5911147051925125 | 31436.0 |
| 17 | rs2532231                                 | 44274474 | C                                 | T  | 3.1841021524474027e-14 | 7.590607044648504  | 31058.0 |
| 17 | rs10514899                                | 44119987 | C                                 | G  | 3.2417572680618755e-14 | 7.588281628652442  | 32155.0 |
| 17 | 17:44221843_A_G                           | 44221843 | A                                 | G  | 3.701082879538306e-14  | 7.571089028173356  | 31509.0 |
| 17 | rs62063662                                | 44119840 | T                                 | C  | 4.162144509646456e-14  | 7.55582459292876   | 32145.0 |
| 17 | rs4792827                                 | 44131305 | T                                 | C  | 4.525871664883928e-14  | 7.544913681717287  | 32186.0 |
| 17 | rs16940845                                | 44116843 | C                                 | A  | 5.54497518594104e-14   | 7.518402078825425  | 32186.0 |
| 17 | 17:44235827_C_A                           | 44235827 | C                                 | A  | 6.414129976668959e-14  | 7.4993372625050405 | 31424.0 |
| 17 | 17:44262950_G_A                           | 44262950 | G                                 | A  | 7.905298590330521e-14  | 7.471886826823125  | 31063.0 |
| 17 | rs7206949                                 | 44247017 | C                                 | A  | 9.121445721906327e-14  | 7.453038779941987  | 31433.0 |
| 17 | rs62071628                                | 44356058 | G                                 | A  | 9.372049721569844e-14  | 7.449463594156009  | 29940.0 |
| 17 | rs916896                                  | 44098797 | C                                 | T  | 9.501552202862083e-14  | 7.44765273390392   | 31873.0 |
| 17 | rs2732610                                 | 44365490 | C                                 | T  | 1.4632985329522965e-13 | 7.39045260467646   | 28524.0 |
| 17 | 17:44286384_C_A                           | 44286384 | C                                 | A  | 1.5677689447218874e-13 | 7.381278310002557  | 30912.0 |
| 17 | rs28787973                                | 44084349 | T                                 | A  | 1.6261729526153812e-13 | 7.376407892845621  | 31447.0 |
| 17 | rs28753217                                | 44084350 | A                                 | T  | 1.6261729526153812e-13 | 7.376407892845621  | 31447.0 |
| 17 | 17:44270181_G_A                           | 44270181 | G                                 | A  | 1.772164883371061e-13  | 7.364947581948904  | 31009.0 |
| 17 | rs7225002                                 | 44189067 | A                                 | G  | 2.0855535071878594e-13 | 7.343194343001845  | 32016.0 |
| 17 | rs4988900                                 | 44342378 | G                                 | A  | 2.1510463799243e-13    | 7.3390566005727855 | 30044.0 |
| 17 | rs41543317                                | 44087500 | A                                 | G  | 2.72179029812221e-13   | 7.307489774832258  | 32186.0 |
| 17 | rs11654982                                | 44284600 | G                                 | A  | 2.8773910537242517e-13 | 7.300013383248197  | 30935.0 |
| 17 | rs56087321                                | 44084403 | G                                 | C  | 8.070230228141074e-13  | 7.15995711665839   | 31994.0 |
| 17 | rs4510068                                 | 44184828 | G                                 | T  | 9.779838480860608e-13  | 7.1335702129148535 | 31147.0 |
| 17 | 17:44265839_C_T                           | 44265839 | C                                 | T  | 1.1781176311389222e-12 | 7.107911847653782  | 31488.0 |
| 17 | 17:44289832_A_G                           | 44289832 | A                                 | G  | 1.708862261797252e-12  | 7.056388022347883  | 31415.0 |
| 17 | rs2532351                                 | 44336997 | C                                 | G  | 3.341428429409897e-12  | 6.962560574598143  | 29681.0 |
| 17 | rs5820605                                 | 44102682 | C                                 | CT | 4.549285068847872e-12  | 6.9189733248548215 | 31797.0 |
| 17 | rs556046991                               | 44212908 | AT                                | A  | 2.5284615680573183e-11 | 6.671706325089718  | 30379.0 |
| 17 | 17:44776768_GAC_G                         | 44776768 | GAC                               | G  | 2.7670825585399068e-11 | 6.6584617624473985 | 27910.0 |
| 17 | rs7225145                                 | 44363740 | C                                 | A  | 1.0468120415860143e-10 | 6.4600314778510475 | 27604.0 |
| 17 | rs12946693                                | 44084008 | T                                 | C  | 3.5501898495868213e-10 | 6.272621601170705  | 30782.0 |
| 17 | rs141698966                               | 44113227 | T                                 | TG | 9.486148463518452e-10  | 6.1178244482294035 | 31241.0 |
| 17 | 17:43850935_CA_C                          | 43850935 | CA                                | C  | 1.7293561995738133e-09 | 6.02138055476673   | 31964.0 |
| 17 | 17:43975360_ATTACTGTATA<br>AGCTGCTTATAT_A | 43975360 | ATTACTGTATA<br>TAAGCTGCT<br>TATAT | A  | 1.817261697786532e-09  | 6.013351708151768  | 31537.0 |
| 17 | rs201474071                               | 44113197 | G                                 | GA | 2.063508245962949e-09  | 5.992727216507348  | 31754.0 |
| 17 | rs552290972                               | 43947883 | T                                 | G  | 2.345121521146673e-09  | 5.971895905764653  | 30687.0 |
| 17 | 17:44125277_CT_C                          | 44125277 | CT                                | C  | 2.4498426228045372e-09 | 5.964766404918502  | 31244.0 |
| 17 | rs3874943                                 | 44572068 | A                                 | G  | 2.5195362927716274e-09 | 5.960184288844944  | 27960.0 |
| 17 | rs55767267                                | 43960325 | T                                 | C  | 2.9062622168003382e-09 | 5.936807127465631  | 31886.0 |



|    |                          |          |            |     |                        |                    |         |
|----|--------------------------|----------|------------|-----|------------------------|--------------------|---------|
| 17 | rs56127309               | 43960341 | G          | A   | 2.9062622168003382e-09 | 5.936807127465631  | 31886.0 |
| 17 | rs56365901               | 43960323 | A          | G   | 3.363145642852868e-09  | 5.9128126890820525 | 31885.0 |
| 17 | rs113758975              | 44207523 | T          | A   | 3.627707827590935e-09  | 5.9003320268691155 | 31745.0 |
| 17 | 17:44238616_TAAAAAAAAA_T | 44238616 | TAAAAAAAAA | T   | 3.763144394135963e-09  | 5.894281823598792  | 30703.0 |
| 17 | rs62063672               | 44125288 | A          | G   | 3.781960260626573e-09  | 5.893458102592508  | 31311.0 |
| 17 | rs11653367               | 44191483 | A          | G   | 4.224703479899445e-09  | 5.875146193674572  | 31486.0 |
| 17 | rs55657917               | 43844560 | T          | G   | 4.772312670729565e-09  | 5.854922931424293  | 31909.0 |
| 17 | rs111905143              | 44184808 | C          | G   | 4.9122925833058585e-09 | 5.850116352840077  | 32065.0 |
| 17 | rs56194509               | 43844559 | T          | G   | 4.929924900067284e-09  | 5.8495203763914905 | 31910.0 |
| 17 | rs112384186              | 44129398 | G          | GA  | 4.9344669353585786e-09 | 5.849367190484272  | 31969.0 |
| 17 | rs1987152                | 44156180 | A          | G   | 4.938160365611556e-09  | 5.84924272596936   | 32017.0 |
| 17 | rs1987151                | 44156181 | T          | A   | 4.938160365611556e-09  | 5.84924272596936   | 32017.0 |
| 17 | rs146712066              | 43970012 | C          | CAG | 4.9889700481133636e-09 | 5.847539629369838  | 31857.0 |
| 17 | rs62055546               | 43964567 | A          | C   | 5.098216431587452e-09  | 5.8439342269399    | 31956.0 |
| 17 | rs368385820              | 44106792 | T          | TA  | 5.12279839108671e-09   | 5.843133326832207  | 31170.0 |
| 17 | rs78005814               | 44125175 | A          | C   | 5.264651549300895e-09  | 5.838583438455203  | 26395.0 |
| 17 | rs113161176              | 43974354 | G          | A   | 5.365659004771693e-09  | 5.835415793866591  | 32108.0 |
| 17 | rs10221243               | 44212310 | G          | A   | 5.5518526502616836e-09 | 5.8297257994907685 | 32040.0 |
| 17 | rs7207582                | 44210933 | A          | G   | 5.732365591624566e-09  | 5.824383944090744  | 32042.0 |
| 17 | 17:44127285_CTT_C        | 44127285 | CTT        | C   | 5.859930651890654e-09  | 5.820706747588661  | 32093.0 |
| 17 | rs112166495              | 44005361 | G          | A   | 5.903844898784417e-09  | 5.8194588700593135 | 31862.0 |
| 17 | rs112572874              | 44072984 | A          | G   | 5.991871885911168e-09  | 5.816984434847938  | 32096.0 |
| 17 | rs62061820               | 44185431 | T          | C   | 6.0742608604278374e-09 | 5.814700313852785  | 32040.0 |
| 17 | rs8070942                | 44208674 | G          | T   | 6.3931664243754524e-09 | 5.806134362495151  | 32053.0 |
| 17 | rs137941099              | 44003625 | T          | TAA | 6.436529570610816e-09  | 5.8050018436902455 | 31798.0 |
| 17 | rs9303525                | 44187257 | A          | G   | 6.510220896236532e-09  | 5.803094155298064  | 32055.0 |
| 17 | rs6503457                | 44208312 | G          | T   | 6.589502368966091e-09  | 5.801065063555706  | 32050.0 |
| 17 | rs200924217              | 44010463 | A          | AC  | 6.677133490488729e-09  | 5.798849719070576  | 32103.0 |
| 17 | rs9910284                | 44200191 | C          | T   | 6.787093327748542e-09  | 5.7961095610645925 | 31742.0 |
| 17 | rs2696578                | 44227623 | T          | C   | 6.866835012913628e-09  | 5.794149304538688  | 32033.0 |
| 17 | rs112790197              | 44182845 | T          | TG  | 6.938460764720714e-09  | 5.792407341025692  | 32055.0 |
| 17 | rs2532387                | 44313522 | G          | T   | 7.018141668292813e-09  | 5.790489904675497  | 31628.0 |
| 17 | 17:44212782_T_C          | 44212782 | T          | C   | 7.029339306356394e-09  | 5.790222143617128  | 32050.0 |
| 17 | rs2668669                | 44284734 | G          | C   | 7.089644127740483e-09  | 5.7887872122919575 | 31844.0 |
| 17 | rs2696441                | 44274985 | C          | A   | 7.237490140509601e-09  | 5.7853188864642275 | 31999.0 |
| 17 | rs17689182               | 43783573 | C          | T   | 7.464685432067008e-09  | 5.7801211442091445 | 31999.0 |
| 17 | rs2696459                | 44285142 | G          | C   | 7.580921467356801e-09  | 5.777521106106148  | 31613.0 |
| 17 | rs62062271               | 44091988 | T          | C   | 7.826731463699745e-09  | 5.772148019227184  | 31960.0 |
| 17 | rs62062324               | 44114362 | A          | T   | 7.827904281718493e-09  | 5.772122778376504  | 31749.0 |
| 17 | rs62062325               | 44114364 | C          | A   | 7.827904281718493e-09  | 5.772122778376504  | 31749.0 |
| 17 | rs62057121               | 43900760 | G          | A   | 7.885584212843481e-09  | 5.770885933083626  | 31758.0 |
| 17 | rs4471723                | 44205690 | C          | T   | 7.950994239275908e-09  | 5.769493929153912  | 32064.0 |
| 17 | rs2732666                | 44286198 | G          | A   | 7.976385425108773e-09  | 5.768956572248392  | 31885.0 |
| 17 | rs79857651               | 44013475 | G          | A   | 8.00516699267329e-09   | 5.768349471769907  | 32036.0 |
| 17 | rs113756354              | 44013483 | A          | G   | 8.00516699267329e-09   | 5.768349471769907  | 32036.0 |
| 17 | rs113141256              | 43991468 | T          | TA  | 8.005737952935895e-09  | 5.768337449770316  | 32140.0 |
| 17 | 17:44183002_C_A          | 44183002 | C          | A   | 8.007451073610568e-09  | 5.7683013837230765 | 32081.0 |
| 17 | rs16940904               | 44186063 | C          | T   | 8.139461127296319e-09  | 5.7655445204118765 | 31950.0 |
| 17 | rs2696658                | 44245766 | G          | A   | 8.292381343594003e-09  | 5.762404809987661  | 32030.0 |
| 17 | rs2532252                | 44257783 | A          | G   | 8.33967854983302e-09   | 5.761445110299026  | 31604.0 |
| 17 | rs2004674                | 44075110 | A          | T   | 8.380549158328217e-09  | 5.760620064166237  | 32045.0 |
| 17 | rs2532402                | 44304130 | C          | G   | 8.432364624567446e-09  | 5.7595796820975576 | 31640.0 |
| 17 | rs62061813               | 44181118 | G          | A   | 8.781696169491658e-09  | 5.7527236756998015 | 32062.0 |
| 17 | rs111952388              | 44181454 | C          | T   | 8.781696169491658e-09  | 5.7527236756998015 | 32062.0 |

|    |                                         |          |                               |             |                        |                    |         |
|----|-----------------------------------------|----------|-------------------------------|-------------|------------------------|--------------------|---------|
| 17 | rs62061814                              | 44181508 | T                             | G           | 8.781696169491658e-09  | 5.7527236756998015 | 32062.0 |
| 17 | rs7220752                               | 44138201 | T                             | C           | 8.849983965520486e-09  | 5.751414492192211  | 32136.0 |
| 17 | rs62062789                              | 44025033 | T                             | C           | 8.990046245816046e-09  | 5.748759732385103  | 32031.0 |
| 17 | rs62062790                              | 44025045 | C                             | T           | 8.990046245816046e-09  | 5.748759732385103  | 32031.0 |
| 17 | rs201722973                             | 44161747 | C                             | CCAA<br>CAA | 9.019076026939812e-09  | 5.748214531246369  | 32176.0 |
| 17 | rs2532315                               | 44213934 | G                             | A           | 9.071923182049246e-09  | 5.747226387073598  | 31708.0 |
| 17 | rs62054372                              | 43798775 | G                             | C           | 9.080642081525762e-09  | 5.7470638977292285 | 31764.0 |
| 17 | 17:43798790_TTTC_T                      | 43798790 | TTTC                          | T           | 9.080642081525762e-09  | 5.7470638977292285 | 31764.0 |
| 17 | rs62061848                              | 44192946 | C                             | T           | 9.09920515535972e-09   | 5.746718452517286  | 31889.0 |
| 17 | rs62063298                              | 44048323 | G                             | T           | 9.100629644840502e-09  | 5.746691972121361  | 31939.0 |
| 17 | rs62063299                              | 44048336 | T                             | C           | 9.100629644840502e-09  | 5.746691972121361  | 31939.0 |
| 17 | rs62055545                              | 43964561 | C                             | T           | 9.115275716936577e-09  | 5.746419943967272  | 31871.0 |
| 17 | rs9907738                               | 44151546 | T                             | G           | 9.152838703954849e-09  | 5.745724207134223  | 32138.0 |
| 17 | 17:44024749_CT_C                        | 44024749 | CT                            | C           | 9.199580751573985e-09  | 5.7448623226173545 | 25804.0 |
| 17 | rs8080583                               | 44162597 | C                             | A           | 9.208616587039008e-09  | 5.744696200439411  | 32138.0 |
| 17 | rs112439933                             | 44005226 | A                             | C           | 9.25017531913764e-09   | 5.743934185472909  | 32124.0 |
| 17 | 17:44263341_GA_G                        | 44263341 | GA                            | G           | 9.260577265792153e-09  | 5.743743977624972  | 31990.0 |
| 17 | rs113313477                             | 44005186 | G                             | A           | 9.358106492034937e-09  | 5.741970613508898  | 32119.0 |
| 17 | rs7221390                               | 44116950 | T                             | G           | 9.42750567347102e-09   | 5.740719642018024  | 32129.0 |
| 17 | rs2066899                               | 44155732 | C                             | T           | 9.42750567347102e-09   | 5.740719642018024  | 32140.0 |
| 17 | rs8077487                               | 44115440 | T                             | C           | 9.43488254132351e-09   | 5.740587195258987  | 32128.0 |
| 17 | rs62061817                              | 44182706 | A                             | G           | 9.474748270521084e-09  | 5.739873169936041  | 32062.0 |
| 17 | rs62062133                              | 44114372 | T                             | C           | 9.502340489183279e-09  | 5.7393806805580665 | 31771.0 |
| 17 | rs7218319                               | 44126365 | C                             | T           | 9.528927600124829e-09  | 5.738907444500238  | 32134.0 |
| 17 | rs2097760                               | 44168677 | A                             | G           | 9.587635626554305e-09  | 5.737867003672412  | 32137.0 |
| 17 | 17:44292021_C_CAAA                      | 44292021 | C                             | CAAA        | 9.631488714112438e-09  | 5.7370938591622345 | 31895.0 |
| 17 | rs34579536                              | 44108906 | A                             | G           | 9.676088810140791e-09  | 5.736311046424043  | 32186.0 |
| 17 | rs2696694                               | 44343370 | C                             | G           | 9.746831908265065e-09  | 5.735076541377636  | 30735.0 |
| 17 | rs2696690                               | 44344178 | T                             | G           | 9.833930999654512e-09  | 5.733568523087111  | 31132.0 |
| 17 | 17:43996716_GC_G                        | 43996716 | GC                            | G           | 1.0003248259976625e-08 | 5.730673783696318  | 31925.0 |
| 17 | rs4383188                               | 44197603 | T                             | C           | 1.0028645654448288e-08 | 5.730243688830643  | 32075.0 |
| 17 | rs17573907                              | 44099082 | C                             | T           | 1.0057248730507933e-08 | 5.729760572748196  | 32174.0 |
| 17 | rs62062286                              | 44096486 | C                             | T           | 1.0169719399655156e-08 | 5.727873765069468  | 32139.0 |
| 17 | rs62056842                              | 43991515 | T                             | G           | 1.0174125328745758e-08 | 5.727800264704152  | 32128.0 |
| 17 | 17:44104278_TG_T                        | 44104278 | TG                            | T           | 1.0201686751161462e-08 | 5.727341181821134  | 32150.0 |
| 17 | rs78556223                              | 44026478 | A                             | G           | 1.0261254101117566e-08 | 5.726353089473003  | 32014.0 |
| 17 | rs2004673                               | 44075099 | T                             | C           | 1.0384436298507755e-08 | 5.724327329595718  | 32046.0 |
| 17 | rs55703644                              | 44274766 | T                             | C           | 1.0397933653611111e-08 | 5.724106783894618  | 32042.0 |
| 17 | rs111657460                             | 44166362 | G                             | GA          | 1.0456250366158628e-08 | 5.7231570806458585 | 32134.0 |
| 17 | rs62061717                              | 44012248 | T                             | A           | 1.0469765016451486e-08 | 5.722937725776888  | 32009.0 |
| 17 | rs7350980                               | 44110271 | G                             | A           | 1.0477569726427747e-08 | 5.72281117366795   | 32131.0 |
| 17 | rs1029463                               | 44150161 | T                             | G           | 1.0509516905837769e-08 | 5.7222941086111065 | 31902.0 |
| 17 | 17:44161091_GCTCCCCTGG<br>TAAGTCCTAAA_G | 44161091 | GCTCCCCTG<br>GTAAGTCCT<br>AAA | G           | 1.0578876443579533e-08 | 5.72117676316835   | 31621.0 |
| 17 | rs4597358                               | 44110670 | C                             | G           | 1.0670238098857621e-08 | 5.71971579204759   | 32128.0 |
| 17 | rs62062290                              | 44099129 | C                             | A           | 1.0761763244878894e-08 | 5.718264346205183  | 32182.0 |
| 17 | rs62057063                              | 43856730 | C                             | T           | 1.0860218739791629e-08 | 5.716716329061586  | 32130.0 |
| 17 | rs111324579                             | 44082181 | A                             | G           | 1.0897173786277804e-08 | 5.716138802390118  | 32155.0 |
| 17 | rs2532343                               | 44344097 | G                             | C           | 1.0919684784044884e-08 | 5.715787936794063  | 31285.0 |
| 17 | rs76924476                              | 44199029 | T                             | C           | 1.0960879223779716e-08 | 5.715147679782088  | 32053.0 |
| 17 | rs113343439                             | 44314217 | A                             | G           | 1.109803958939614e-08  | 5.7130326190496525 | 32135.0 |
| 17 | 17:44617964_TA_T                        | 44617964 | TA                            | T           | 1.127573554916828e-08  | 5.710329945665555  | 24240.0 |
| 17 | rs1029464                               | 44149348 | A                             | C           | 1.1311031160568889e-08 | 5.70979804621208   | 32085.0 |
| 17 | rs62062277                              | 44093753 | T                             | G           | 1.1376948637395873e-08 | 5.7088089847934285 | 32117.0 |
| 17 | rs55686102                              | 44202608 | C                             | T           | 1.1401643569912871e-08 | 5.708439882015022  | 32098.0 |

|    |                    |          |      |           |                        |                    |         |
|----|--------------------|----------|------|-----------|------------------------|--------------------|---------|
| 17 | rs78765934         | 44261613 | T    | TCC       | 1.1454599412845998e-08 | 5.707650989770802  | 31949.0 |
| 17 | rs17577159         | 44188477 | T    | G         | 1.1460606536654154e-08 | 5.707561724543995  | 32104.0 |
| 17 | rs62061823         | 44188645 | C    | T         | 1.1460606536654154e-08 | 5.707561724543995  | 32104.0 |
| 17 | rs35095455         | 44249911 | T    | TA        | 1.1463367602877696e-08 | 5.707520710641857  | 31998.0 |
| 17 | rs2532246          | 44262418 | G    | A         | 1.1494596762329644e-08 | 5.707057488280466  | 31935.0 |
| 17 | rs62063786         | 44061023 | G    | A         | 1.1525582796761422e-08 | 5.7065990793488535 | 32186.0 |
| 17 | 17:44058699_TAGG_T | 44058699 | TAGG | T         | 1.165265937673128e-08  | 5.704731544771029  | 31776.0 |
| 17 | rs62063300         | 44048350 | T    | C         | 1.1661328529001888e-08 | 5.704604863856237  | 31949.0 |
| 17 | rs4581739          | 44204739 | T    | C         | 1.1731491510169164e-08 | 5.703582938351105  | 32095.0 |
| 17 | rs113638513        | 44204749 | A    | G         | 1.1731491510169164e-08 | 5.703582938351105  | 32095.0 |
| 17 | 17:44003580_GA_G   | 44003580 | GA   | G         | 1.173656053059945e-08  | 5.703509338157732  | 32113.0 |
| 17 | rs17577369         | 44192923 | A    | G         | 1.174637227729239e-08  | 5.703366963154106  | 31867.0 |
| 17 | rs111697872        | 43840726 | C    | CTT       | 1.1750282586896844e-08 | 5.7033102541508045 | 31913.0 |
| 17 | rs62063280         | 44037299 | G    | C         | 1.1892244391697479e-08 | 5.701263783491683  | 32098.0 |
| 17 | rs113201171        | 44082249 | A    | T         | 1.1999309197316695e-08 | 5.69973601782045   | 32168.0 |
| 17 | rs17661027         | 44193097 | C    | A         | 1.20386153221461e-08   | 5.699178459477285  | 32088.0 |
| 17 | rs2696605          | 44213921 | A    | C         | 1.213082158106812e-08  | 5.697877422455728  | 31737.0 |
| 17 | rs77926909         | 43994252 | T    | C         | 1.2141386274598999e-08 | 5.697728967878548  | 32144.0 |
| 17 | rs2696629          | 44327438 | C    | G         | 1.2173651456289728e-08 | 5.697276354859926  | 31479.0 |
| 17 | rs75210307         | 43940012 | T    | C         | 1.2175116136244289e-08 | 5.6972558361318635 | 31670.0 |
| 17 | rs74944644         | 43940020 | T    | C         | 1.2175116136244289e-08 | 5.6972558361318635 | 31670.0 |
| 17 | rs2532247          | 44262403 | C    | T         | 1.2242418763008577e-08 | 5.6963155703547415 | 31931.0 |
| 17 | rs1918793          | 44228169 | C    | T         | 1.228459207976397e-08  | 5.695728935359227  | 31985.0 |
| 17 | rs12150087         | 44210988 | C    | G         | 1.2309389618270796e-08 | 5.6953849120653794 | 32098.0 |
| 17 | rs1468241          | 44196153 | A    | G         | 1.2355984669810972e-08 | 5.694740303247832  | 32095.0 |
| 17 | rs62055934         | 43848638 | G    | A         | 1.2375669197289433e-08 | 5.694468691456607  | 31958.0 |
| 17 | rs77635460         | 44186593 | T    | C         | 1.2388195796965373e-08 | 5.6942960649313    | 32100.0 |
| 17 | rs2696569          | 44266290 | G    | C         | 1.2420840781774168e-08 | 5.693846986729873  | 31550.0 |
| 17 | rs78929339         | 44189910 | A    | G         | 1.2435347419987253e-08 | 5.693647795210402  | 32005.0 |
| 17 | rs78590209         | 44098862 | A    | G         | 1.2442650981671116e-08 | 5.693547595001906  | 32186.0 |
| 17 | rs55744103         | 44316280 | T    | C         | 1.245004682320814e-08  | 5.693446186990813  | 32135.0 |
| 17 | rs62061816         | 44182336 | C    | A         | 1.245797572558895e-08  | 5.693337534912724  | 32101.0 |
| 17 | rs111854640        | 44276431 | T    | TAGA<br>A | 1.2534611686377576e-08 | 5.692290819441827  | 31731.0 |
| 17 | 17:43972025_TC_T   | 43972025 | TC   | T         | 1.2553865033433435e-08 | 5.692028829174291  | 32150.0 |
| 17 | rs111750615        | 44156132 | T    | TTTA      | 1.2591479197284734e-08 | 5.6915181182271075 | 32021.0 |
| 17 | rs9709338          | 44094871 | A    | G         | 1.2608410416095024e-08 | 5.691288716131664  | 32018.0 |
| 17 | 17:44265192_AT_A   | 44265192 | AT   | A         | 1.2621525157595216e-08 | 5.691111229334996  | 31785.0 |
| 17 | rs55857174         | 44137386 | T    | TAA       | 1.2685146846171165e-08 | 5.690252747941858  | 31940.0 |
| 17 | rs17650842         | 44037491 | A    | G         | 1.2748271867040671e-08 | 5.6894050929992295 | 32121.0 |
| 17 | rs113138968        | 44314261 | C    | T         | 1.2764146342859638e-08 | 5.689192569226142  | 32157.0 |
| 17 | rs9899964          | 44314342 | T    | C         | 1.2764146342859638e-08 | 5.689192569226142  | 32157.0 |
| 17 | rs974294           | 44150163 | T    | G         | 1.2817956641416064e-08 | 5.688474075282652  | 31961.0 |
| 17 | rs77095128         | 44204304 | T    | G         | 1.2883096075054548e-08 | 5.687608221567945  | 32098.0 |
| 17 | rs17660907         | 44191085 | G    | A         | 1.2918755151845635e-08 | 5.687136029855043  | 32108.0 |
| 17 | rs79772780         | 44189855 | G    | A         | 1.292012507414096e-08  | 5.68711791483531   | 31916.0 |
| 17 | rs55909047         | 44209957 | A    | G         | 1.2929078741216775e-08 | 5.686999562921853  | 32106.0 |
| 17 | rs2732631          | 44289232 | G    | T         | 1.2972287866391269e-08 | 5.686429530498604  | 31747.0 |
| 17 | rs62061810         | 44178884 | G    | A         | 1.2977974158376992e-08 | 5.686354652009177  | 32107.0 |
| 17 | 17:44251554_ATG_A  | 44251554 | ATG  | A         | 1.2978799791092566e-08 | 5.686343782524999  | 31316.0 |
| 17 | rs56257094         | 44201667 | G    | A         | 1.2988895022601303e-08 | 5.686210932740496  | 32099.0 |
| 17 | rs55672516         | 44201680 | A    | C         | 1.2988895022601303e-08 | 5.686210932740496  | 32099.0 |
| 17 | rs55669501         | 44202564 | G    | A         | 1.2988895022601303e-08 | 5.686210932740496  | 32099.0 |
| 17 | rs55885063         | 44202952 | C    | G         | 1.2988895022601303e-08 | 5.686210932740496  | 32099.0 |
| 17 | rs56273589         | 44203131 | C    | G         | 1.2988895022601303e-08 | 5.686210932740496  | 32099.0 |

|    |                  |          |    |    |                        |                    |         |
|----|------------------|----------|----|----|------------------------|--------------------|---------|
| 17 | rs62063171       | 44203311 | C  | T  | 1.2988895022601303e-08 | 5.686210932740496  | 32099.0 |
| 17 | rs62063172       | 44203366 | T  | C  | 1.2988895022601303e-08 | 5.686210932740496  | 32099.0 |
| 17 | rs76380490       | 44203413 | C  | T  | 1.2988895022601303e-08 | 5.686210932740496  | 32099.0 |
| 17 | rs113120855      | 44203520 | C  | T  | 1.2988895022601303e-08 | 5.686210932740496  | 32099.0 |
| 17 | 17:44238130_AT_A | 44238130 | AT | A  | 1.2992292422576544e-08 | 5.686166246682251  | 31893.0 |
| 17 | rs34847058       | 44285460 | G  | GA | 1.3000008675557232e-08 | 5.6860647968385445 | 31769.0 |
| 17 | 17:44048939_AG_A | 44048939 | AG | A  | 1.3000835683577132e-08 | 5.6860539271783255 | 31987.0 |
| 17 | rs79301522       | 44207932 | A  | G  | 1.3066240341538411e-08 | 5.685196410957714  | 32095.0 |
| 17 | rs62064668       | 44082981 | G  | A  | 1.30851847717582e-08   | 5.6849488106018375 | 32143.0 |
| 17 | rs35014258       | 44192592 | A  | AT | 1.3086664494636077e-08 | 5.684929485551902  | 32133.0 |
| 17 | rs111327992      | 44126691 | G  | A  | 1.3097489958919875e-08 | 5.684788170490058  | 32157.0 |
| 17 | rs2532289        | 44238571 | C  | G  | 1.326458476114663e-08  | 5.682621199805998  | 31987.0 |
| 17 | rs2532256        | 44255017 | T  | C  | 1.3280432943912072e-08 | 5.682417051363528  | 32069.0 |
| 17 | 17:44285467_A_G  | 44285467 | A  | G  | 1.3302971166540527e-08 | 5.682127132413973  | 31784.0 |
| 17 | rs111541901      | 43994358 | C  | T  | 1.3306355134979376e-08 | 5.6820836441664735 | 32160.0 |
| 17 | rs1881195        | 44257473 | T  | C  | 1.3307577331118151e-08 | 5.6820679400511205 | 31889.0 |
| 17 | rs62063174       | 44205122 | C  | G  | 1.3329501532715356e-08 | 5.681786471647012  | 32108.0 |
| 17 | rs17661348       | 44207066 | A  | G  | 1.3329501532715356e-08 | 5.681786471647012  | 32108.0 |
| 17 | rs62063202       | 44208945 | C  | T  | 1.3329501532715356e-08 | 5.681786471647012  | 32108.0 |
| 17 | rs62063203       | 44209313 | T  | C  | 1.3329501532715356e-08 | 5.681786471647012  | 32108.0 |
| 17 | rs111724389      | 44209364 | G  | A  | 1.3329501532715356e-08 | 5.681786471647012  | 32108.0 |
| 17 | rs112401617      | 44209474 | A  | T  | 1.3329501532715356e-08 | 5.681786471647012  | 32108.0 |
| 17 | rs111424940      | 44211502 | G  | A  | 1.3329501532715356e-08 | 5.681786471647012  | 32108.0 |
| 17 | rs62063207       | 44211902 | A  | G  | 1.3329501532715356e-08 | 5.681786471647012  | 32108.0 |
| 17 | rs62063208       | 44212032 | C  | A  | 1.3329501532715356e-08 | 5.681786471647012  | 32108.0 |
| 17 | rs2532316        | 44213712 | G  | A  | 1.334589722172127e-08  | 5.681576273470894  | 32086.0 |
| 17 | rs2942163        | 44282007 | T  | C  | 1.334589722172127e-08  | 5.681576273470894  | 32068.0 |
| 17 | rs62062778       | 44022528 | A  | G  | 1.334702868792924e-08  | 5.681561776953956  | 32160.0 |
| 17 | rs2696630        | 44327482 | G  | A  | 1.3350706603100502e-08 | 5.681514663192817  | 31412.0 |
| 17 | rs2532274        | 44247164 | A  | G  | 1.3379693137836802e-08 | 5.681143788998659  | 31986.0 |
| 17 | rs62061771       | 44169406 | G  | A  | 1.3403438095770652e-08 | 5.680840560412812  | 32144.0 |
| 17 | rs111689007      | 43981103 | C  | A  | 1.3432726718631917e-08 | 5.680467256014563  | 32180.0 |
| 17 | rs17577954       | 44209628 | T  | C  | 1.3454473026867577e-08 | 5.680190594980607  | 32105.0 |
| 17 | rs75686108       | 44022376 | C  | T  | 1.3477586574570167e-08 | 5.679897015494713  | 32163.0 |
| 17 | rs112003140      | 43980998 | G  | A  | 1.3497592621304009e-08 | 5.679643300948688  | 32177.0 |
| 17 | rs78729125       | 43970108 | C  | A  | 1.3587309242380043e-08 | 5.6785099987296475 | 32170.0 |
| 17 | rs77727624       | 43790770 | A  | G  | 1.3593835915044665e-08 | 5.67842783756996   | 31843.0 |
| 17 | rs2532236        | 44271430 | A  | G  | 1.3618723038718737e-08 | 5.678114896757539  | 32075.0 |
| 17 | rs2532423        | 44285952 | T  | C  | 1.3620839061405951e-08 | 5.678088314660332  | 32012.0 |
| 17 | rs1528075        | 44220454 | T  | G  | 1.3733354060271753e-08 | 5.676680615381238  | 32090.0 |
| 17 | rs62055489       | 43950441 | C  | A  | 1.3743927742705082e-08 | 5.676548902230616  | 31916.0 |
| 17 | rs1816           | 44276618 | A  | G  | 1.377151504909594e-08  | 5.6762057184594354 | 31850.0 |
| 17 | rs62056859       | 43994435 | A  | G  | 1.3778809492125065e-08 | 5.676115087844011  | 32162.0 |
| 17 | rs62061847       | 44191682 | G  | A  | 1.3829879194351662e-08 | 5.675481869139421  | 32109.0 |
| 17 | 17:44282744_G_C  | 44282744 | G  | C  | 1.3830172112089745e-08 | 5.675478243776992  | 32064.0 |
| 17 | rs112402370      | 44092744 | A  | G  | 1.3845314478917476e-08 | 5.6752909323857805 | 31806.0 |
| 17 | rs17577313       | 44191835 | A  | G  | 1.3917340317897564e-08 | 5.6744026871640685 | 32103.0 |
| 17 | rs62055876       | 43832940 | A  | G  | 1.3964181600160998e-08 | 5.673827419119629  | 32109.0 |
| 17 | rs56119705       | 44209985 | T  | C  | 1.3977494546333131e-08 | 5.673664262001751  | 32106.0 |
| 17 | rs2668657        | 44282892 | T  | C  | 1.399437548706368e-08  | 5.673457594183887  | 31571.0 |
| 17 | rs12185233       | 43923654 | G  | C  | 1.4088921056165821e-08 | 5.6723045615076515 | 32186.0 |
| 17 | rs740710         | 44214815 | C  | G  | 1.41123066038136e-08   | 5.672020522139162  | 32088.0 |
| 17 | rs1918802        | 44215045 | T  | C  | 1.41123066038136e-08   | 5.672020522139162  | 32088.0 |
| 17 | rs2696603        | 44215823 | A  | G  | 1.41123066038136e-08   | 5.672020522139162  | 32088.0 |

|    |                     |          |       |   |                        |                    |         |
|----|---------------------|----------|-------|---|------------------------|--------------------|---------|
| 17 | rs2532313           | 44217293 | G     | A | 1.41123066038136e-08   | 5.672020522139162  | 32088.0 |
| 17 | rs2532308           | 44220942 | G     | A | 1.41123066038136e-08   | 5.672020522139162  | 32088.0 |
| 17 | 17:44221350_G_A     | 44221350 | G     | A | 1.41123066038136e-08   | 5.672020522139162  | 32088.0 |
| 17 | rs2696590           | 44221602 | G     | C | 1.41123066038136e-08   | 5.672020522139162  | 32088.0 |
| 17 | rs1406074           | 44222067 | T     | G | 1.41123066038136e-08   | 5.672020522139162  | 32088.0 |
| 17 | rs1918798           | 44222335 | G     | A | 1.41123066038136e-08   | 5.672020522139162  | 32088.0 |
| 17 | rs2696458           | 44284420 | C     | T | 1.4118781666943559e-08 | 5.671941957262657  | 31913.0 |
| 17 | rs9944484           | 43990662 | G     | A | 1.417518781689061e-08  | 5.671259032654301  | 32174.0 |
| 17 | rs12150320          | 44213204 | C     | T | 1.4198814017473974e-08 | 5.670973767934006  | 32089.0 |
| 17 | 17:44279371_TCAAA_T | 44279371 | TCAAA | T | 1.4222077426296612e-08 | 5.6706933337770975 | 32049.0 |
| 17 | rs382104            | 44305026 | G     | A | 1.4259155330449068e-08 | 5.670247289362929  | 32024.0 |
| 17 | rs2696600           | 44216226 | A     | G | 1.4298749085903576e-08 | 5.669772221705316  | 32089.0 |
| 17 | rs62062279          | 44093964 | T     | C | 1.4320354377379992e-08 | 5.669513528161421  | 32175.0 |
| 17 | rs62062280          | 44093993 | C     | T | 1.4320354377379992e-08 | 5.669513528161421  | 32175.0 |
| 17 | rs112073200         | 44201791 | G     | C | 1.4325811238024417e-08 | 5.669448249760468  | 32094.0 |
| 17 | 17:43841356_CTT_C   | 43841356 | CTT   | C | 1.4338450687139852e-08 | 5.6692971414373945 | 31769.0 |
| 17 | rs77084869          | 43982903 | A     | G | 1.4355961733755425e-08 | 5.669088005413522  | 32179.0 |
| 17 | rs74573628          | 43982961 | T     | C | 1.4355961733755425e-08 | 5.669088005413522  | 32179.0 |
| 17 | rs62056805          | 43983363 | G     | A | 1.4355961733755425e-08 | 5.669088005413522  | 32179.0 |
| 17 | rs62054833          | 43933673 | T     | C | 1.4363458412531882e-08 | 5.668998547639752  | 32155.0 |
| 17 | rs740711            | 44214814 | G     | A | 1.4416347892423576e-08 | 5.668368703900398  | 32014.0 |
| 17 | 17:44155925_TACAA_T | 44155925 | TACAA | T | 1.442316326742013e-08  | 5.668287705112364  | 32133.0 |
| 17 | rs17770186          | 43964191 | C     | A | 1.4424384265299169e-08 | 5.668273197828037  | 32183.0 |
| 17 | rs62060915          | 44251548 | G     | A | 1.4435886969544584e-08 | 5.668136586990582  | 32080.0 |
| 17 | rs2696664           | 44251698 | G     | A | 1.4435886969544584e-08 | 5.668136586990582  | 32080.0 |
| 17 | rs2732643           | 44251907 | C     | T | 1.4435886969544584e-08 | 5.668136586990582  | 32080.0 |
| 17 | rs17573593          | 44082603 | A     | C | 1.4444952955703834e-08 | 5.668028990110214  | 32177.0 |
| 17 | rs62061853          | 44196125 | T     | C | 1.4454942188110674e-08 | 5.667910511898155  | 32105.0 |
| 17 | rs62063163          | 44201865 | C     | T | 1.4461877474290664e-08 | 5.667828302065617  | 32095.0 |
| 17 | rs62063164          | 44201887 | C     | T | 1.4461877474290664e-08 | 5.667828302065617  | 32095.0 |
| 17 | rs62063165          | 44202147 | A     | G | 1.4461877474290664e-08 | 5.667828302065617  | 32095.0 |
| 17 | rs62063166          | 44202231 | A     | G | 1.4461877474290664e-08 | 5.667828302065617  | 32095.0 |
| 17 | rs17577024          | 44186252 | G     | A | 1.4501205034190557e-08 | 5.667362842215812  | 32110.0 |
| 17 | rs17577052          | 44186301 | T     | C | 1.4501205034190557e-08 | 5.667362842215812  | 32110.0 |
| 17 | rs62061822          | 44186894 | A     | C | 1.4501205034190557e-08 | 5.667362842215812  | 32110.0 |
| 17 | rs17577094          | 44187492 | A     | G | 1.4501205034190557e-08 | 5.667362842215812  | 32110.0 |
| 17 | rs62061824          | 44188755 | T     | C | 1.4501205034190557e-08 | 5.667362842215812  | 32110.0 |
| 17 | rs55794067          | 44188764 | T     | C | 1.4501205034190557e-08 | 5.667362842215812  | 32110.0 |
| 17 | rs17660847          | 44189373 | C     | T | 1.4501205034190557e-08 | 5.667362842215812  | 32110.0 |
| 17 | rs17660865          | 44189408 | T     | C | 1.4501205034190557e-08 | 5.667362842215812  | 32110.0 |
| 17 | rs17660936          | 44191159 | C     | T | 1.4501205034190557e-08 | 5.667362842215812  | 32110.0 |
| 17 | rs4548919           | 44192395 | G     | T | 1.4501205034190557e-08 | 5.667362842215812  | 32110.0 |
| 17 | rs4606752           | 44192618 | A     | G | 1.4501205034190557e-08 | 5.667362842215812  | 32110.0 |
| 17 | rs62061849          | 44193882 | C     | T | 1.4501205034190557e-08 | 5.667362842215812  | 32110.0 |
| 17 | rs17661045          | 44194152 | T     | A | 1.4501205034190557e-08 | 5.667362842215812  | 32110.0 |
| 17 | rs17577447          | 44194381 | T     | A | 1.4501205034190557e-08 | 5.667362842215812  | 32110.0 |
| 17 | rs62061850          | 44194519 | T     | C | 1.4501205034190557e-08 | 5.667362842215812  | 32110.0 |
| 17 | rs62061852          | 44195424 | A     | C | 1.4501205034190557e-08 | 5.667362842215812  | 32110.0 |
| 17 | rs727425            | 44195495 | G     | A | 1.4501205034190557e-08 | 5.667362842215812  | 32110.0 |
| 17 | rs17661141          | 44196015 | C     | G | 1.4501205034190557e-08 | 5.667362842215812  | 32110.0 |
| 17 | rs1468240           | 44196447 | T     | A | 1.4501205034190557e-08 | 5.667362842215812  | 32110.0 |
| 17 | rs112813897         | 44196799 | G     | A | 1.4501205034190557e-08 | 5.667362842215812  | 32110.0 |
| 17 | 17:44243543_TA_T    | 44243543 | TA    | T | 1.450703646504456e-08  | 5.667293928949545  | 32076.0 |
| 17 | rs112102887         | 44179749 | G     | A | 1.4521778749498228e-08 | 5.6671198310949435 | 32110.0 |

|    |                     |          |        |            |                        |                    |         |
|----|---------------------|----------|--------|------------|------------------------|--------------------|---------|
| 17 | rs112893440         | 44179969 | G      | A          | 1.4521778749498228e-08 | 5.6671198310949435 | 32110.0 |
| 17 | rs17576842          | 44179992 | A      | G          | 1.4521778749498228e-08 | 5.6671198310949435 | 32110.0 |
| 17 | rs62061772          | 44169437 | T      | C          | 1.4582540474274828e-08 | 5.6664040776776154 | 32151.0 |
| 17 | rs56240678          | 44176170 | C      | G          | 1.4582694747662427e-08 | 5.666402264076862  | 32111.0 |
| 17 | rs62061808          | 44177337 | C      | T          | 1.4582694747662427e-08 | 5.666402264076862  | 32111.0 |
| 17 | rs77604208          | 44177669 | C      | T          | 1.4582694747662427e-08 | 5.666402264076862  | 32111.0 |
| 17 | rs17660464          | 44177993 | C      | A          | 1.4582694747662427e-08 | 5.666402264076862  | 32111.0 |
| 17 | rs17576779          | 44178272 | C      | T          | 1.4582694747662427e-08 | 5.666402264076862  | 32111.0 |
| 17 | rs17660488          | 44178337 | T      | C          | 1.4582694747662427e-08 | 5.666402264076862  | 32111.0 |
| 17 | rs62061809          | 44178839 | T      | C          | 1.4582694747662427e-08 | 5.666402264076862  | 32111.0 |
| 17 | rs62061811          | 44180173 | T      | G          | 1.4582694747662427e-08 | 5.666402264076862  | 32111.0 |
| 17 | rs17576870          | 44180442 | A      | G          | 1.4582694747662427e-08 | 5.666402264076862  | 32111.0 |
| 17 | rs17660595          | 44180954 | A      | G          | 1.4582694747662427e-08 | 5.666402264076862  | 32111.0 |
| 17 | rs62061812          | 44180997 | C      | T          | 1.4582694747662427e-08 | 5.666402264076862  | 32111.0 |
| 17 | rs62061815          | 44181681 | A      | G          | 1.4582694747662427e-08 | 5.666402264076862  | 32111.0 |
| 17 | rs17576954          | 44181933 | T      | C          | 1.4582694747662427e-08 | 5.666402264076862  | 32111.0 |
| 17 | rs77924366          | 44182181 | T      | C          | 1.4582694747662427e-08 | 5.666402264076862  | 32111.0 |
| 17 | rs62061818          | 44182917 | C      | G          | 1.4582694747662427e-08 | 5.666402264076862  | 32111.0 |
| 17 | rs111676341         | 44183403 | A      | G          | 1.4582694747662427e-08 | 5.666402264076862  | 32111.0 |
| 17 | rs17576989          | 44183616 | C      | A          | 1.4582694747662427e-08 | 5.666402264076862  | 32111.0 |
| 17 | rs79923708          | 44183790 | G      | A          | 1.4582694747662427e-08 | 5.666402264076862  | 32111.0 |
| 17 | rs76761511          | 44185245 | C      | A          | 1.4582694747662427e-08 | 5.666402264076862  | 32111.0 |
| 17 | rs62056775          | 43969952 | T      | C          | 1.4599932017891488e-08 | 5.6661997441695355 | 32176.0 |
| 17 | rs62056776          | 43969995 | C      | T          | 1.4599932017891488e-08 | 5.6661997441695355 | 32176.0 |
| 17 | rs17770343          | 43970154 | T      | C          | 1.4599932017891488e-08 | 5.6661997441695355 | 32176.0 |
| 17 | rs34200189          | 44343125 | C      | T          | 1.4610593096461796e-08 | 5.666074603857435  | 31522.0 |
| 17 | rs111880194         | 44194621 | C      | G          | 1.4642931968502232e-08 | 5.665695550326655  | 32107.0 |
| 17 | rs62063301          | 44048941 | G      | C          | 1.4668150199158358e-08 | 5.665400523841102  | 32107.0 |
| 17 | rs62063302          | 44048943 | G      | A          | 1.4668150199158358e-08 | 5.665400523841102  | 32107.0 |
| 17 | rs55788678          | 43992233 | C      | T          | 1.4694861718536931e-08 | 5.665088564316528  | 32027.0 |
| 17 | 17:43989129_CA_C    | 43989129 | CA     | C          | 1.4757582417822114e-08 | 5.664358219202338  | 32178.0 |
| 17 | rs199995459         | 43989149 | A      | AAC        | 1.4757582417822114e-08 | 5.664358219202338  | 32178.0 |
| 17 | rs66619507          | 43989151 | A      | AC         | 1.4757582417822114e-08 | 5.664358219202338  | 32178.0 |
| 17 | rs113906906         | 43989159 | G      | GC         | 1.4757582417822114e-08 | 5.664358219202338  | 32178.0 |
| 17 | 17:43989509_TA_T    | 43989509 | TA     | T          | 1.4757582417822114e-08 | 5.664358219202338  | 32178.0 |
| 17 | 17:43774255_TAGCC_T | 43774255 | TAGCC  | T          | 1.4760548399984342e-08 | 5.664323756817423  | 32091.0 |
| 17 | rs2696682           | 44310101 | A      | G          | 1.480239452093904e-08  | 5.663838253360081  | 32023.0 |
| 17 | rs2532314           | 44217112 | G      | T          | 1.4802864189849892e-08 | 5.663832811777213  | 32090.0 |
| 17 | rs1918799           | 44218242 | C      | T          | 1.4802864189849892e-08 | 5.663832811777213  | 32090.0 |
| 17 | rs113089855         | 44256811 | A      | AACA<br>AG | 1.4844200020717588e-08 | 5.663354550642258  | 32062.0 |
| 17 | rs2696703           | 44260967 | G      | A          | 1.4846240996840432e-08 | 5.663330969800586  | 32075.0 |
| 17 | rs62055525          | 43958736 | G      | A          | 1.491132984132945e-08  | 5.662580599102138  | 32145.0 |
| 17 | rs62062772          | 44020314 | C      | T          | 1.4922056133213005e-08 | 5.662457247483374  | 32177.0 |
| 17 | rs62062773          | 44020545 | A      | G          | 1.4922056133213005e-08 | 5.662457247483374  | 32177.0 |
| 17 | rs2732590           | 44266972 | A      | G          | 1.494679748327177e-08  | 5.662173051792737  | 32072.0 |
| 17 | rs62062771          | 44020282 | G      | A          | 1.4961345195018435e-08 | 5.662006160305352  | 32173.0 |
| 17 | rs761294768         | 44262203 | CTTTTT | C          | 1.4980235746671896e-08 | 5.661789682796763  | 32064.0 |
| 17 | rs75839508          | 44022319 | G      | A          | 1.5007240173080026e-08 | 5.661480683828107  | 32167.0 |
| 17 | 17:44061608_GT_G    | 44061608 | GT     | G          | 1.5033921448897772e-08 | 5.661175912496357  | 32162.0 |
| 17 | rs80120913          | 44177755 | C      | G          | 1.504139417959669e-08  | 5.6610906481590275 | 32110.0 |
| 17 | rs2696697           | 44257788 | T      | C          | 1.5054228211434793e-08 | 5.6609443070020085 | 31675.0 |
| 17 | rs430688            | 43685707 | T      | C          | 1.5055077120938775e-08 | 5.6609346315114415 | 31906.0 |
| 17 | rs111878933         | 43856341 | C      | T          | 1.509470970387831e-08  | 5.660483505956402  | 32059.0 |
| 17 | rs111735741         | 43856372 | G      | A          | 1.509470970387831e-08  | 5.660483505956402  | 32059.0 |

|    |                     |          |       |     |                        |                    |         |
|----|---------------------|----------|-------|-----|------------------------|--------------------|---------|
| 17 | rs62063281          | 44038785 | A     | G   | 1.5103542661074415e-08 | 5.66038311990287   | 32186.0 |
| 17 | rs1122381           | 44205839 | A     | G   | 1.515376313671144e-08  | 5.659813448622416  | 32105.0 |
| 17 | rs55709241          | 44041101 | T     | C   | 1.5153976735995342e-08 | 5.6598110295974315 | 31917.0 |
| 17 | rs56280951          | 44041107 | G     | A   | 1.5153976735995342e-08 | 5.6598110295974315 | 31917.0 |
| 17 | rs111678697         | 44197032 | T     | C   | 1.5193008097457935e-08 | 5.659369552062273  | 32109.0 |
| 17 | rs1966345           | 44197806 | T     | C   | 1.5193008097457935e-08 | 5.659369552062273  | 32109.0 |
| 17 | rs62061854          | 44198080 | C     | T   | 1.5193008097457935e-08 | 5.659369552062273  | 32109.0 |
| 17 | rs112560196         | 44200078 | A     | T   | 1.5193008097457935e-08 | 5.659369552062273  | 32109.0 |
| 17 | rs75652502          | 44200510 | C     | A   | 1.5193008097457935e-08 | 5.659369552062273  | 32109.0 |
| 17 | rs62061859          | 44201109 | C     | G   | 1.5193008097457935e-08 | 5.659369552062273  | 32109.0 |
| 17 | rs55802590          | 44201344 | G     | C   | 1.5193008097457935e-08 | 5.659369552062273  | 32109.0 |
| 17 | 17:44325593_TAA_T   | 44325593 | TAA   | T   | 1.5240835097416602e-08 | 5.658830088017088  | 31817.0 |
| 17 | rs62062777          | 44022068 | G     | A   | 1.5288378848105168e-08 | 5.658295446172117  | 32175.0 |
| 17 | rs34256996          | 44197775 | G     | GCA | 1.5305786867496383e-08 | 5.658100092283383  | 32050.0 |
| 17 | rs3087534           | 44198806 | T     | C   | 1.5309130568436687e-08 | 5.658062593769796  | 32105.0 |
| 17 | rs62062797          | 44027366 | T     | G   | 1.532742573560103e-08  | 5.657857560185351  | 32003.0 |
| 17 | rs74863825          | 43963120 | C     | T   | 1.5380055840294728e-08 | 5.657269058414851  | 32177.0 |
| 17 | rs62056761          | 43969686 | T     | A   | 1.5380055840294728e-08 | 5.657269058414851  | 32177.0 |
| 17 | rs17770337          | 43969779 | G     | T   | 1.5380055840294728e-08 | 5.657269058414851  | 32177.0 |
| 17 | rs62056773          | 43969833 | A     | G   | 1.5380055840294728e-08 | 5.657269058414851  | 32177.0 |
| 17 | rs62056774          | 43969901 | G     | A   | 1.5380055840294728e-08 | 5.657269058414851  | 32177.0 |
| 17 | rs62056777          | 43970303 | G     | A   | 1.5380055840294728e-08 | 5.657269058414851  | 32177.0 |
| 17 | rs2696604           | 44214094 | A     | G   | 1.5414010192337196e-08 | 5.656890423202205  | 32086.0 |
| 17 | rs62062798          | 44027383 | A     | G   | 1.5434602942729444e-08 | 5.6566611816965855 | 32000.0 |
| 17 | 17:43947176_AC_A    | 43947176 | AC    | A   | 1.5440476000529367e-08 | 5.656595856402808  | 31848.0 |
| 17 | rs62064663          | 44080039 | T     | G   | 1.5445045449826602e-08 | 5.6565450476761425 | 32163.0 |
| 17 | rs2732670           | 44283479 | T     | C   | 1.545799942736159e-08  | 5.656401088833977  | 31925.0 |
| 17 | rs17577496          | 44194835 | T     | C   | 1.5460504365957716e-08 | 5.656373264722557  | 32109.0 |
| 17 | rs55933304          | 43992305 | G     | A   | 1.5474452169318255e-08 | 5.6562184167035685 | 32115.0 |
| 17 | 17:44126473_AG_A    | 44126473 | AG    | A   | 1.5517626734911468e-08 | 5.6557399520549465 | 32128.0 |
| 17 | rs78773690          | 44126478 | T     | C   | 1.5517626734911468e-08 | 5.6557399520549465 | 32128.0 |
| 17 | rs111164082         | 44047037 | T     | A   | 1.553961406386533e-08  | 5.655496783070992  | 31773.0 |
| 17 | rs62054832          | 43933579 | C     | A   | 1.555165986548028e-08  | 5.655363704118821  | 32137.0 |
| 17 | rs28416808          | 44021218 | C     | T   | 1.5553357964488248e-08 | 5.655344952005117  | 32173.0 |
| 17 | rs17576695          | 44172327 | T     | A   | 1.555609721710122e-08  | 5.655314706619028  | 32112.0 |
| 17 | rs35631660          | 43832337 | A     | G   | 1.558845615664487e-08  | 5.6549578072032975 | 32159.0 |
| 17 | rs529311580         | 43699113 | A     | G   | 1.5595430186242067e-08 | 5.654880982160933  | 31863.0 |
| 17 | rs17661385          | 44207778 | A     | G   | 1.5599550144886507e-08 | 5.654835612886558  | 32105.0 |
| 17 | rs112915466         | 43958744 | A     | G   | 1.5600429207557104e-08 | 5.654825934093138  | 32151.0 |
| 17 | rs56343551          | 43959092 | G     | T   | 1.5647970816190766e-08 | 5.654303271475945  | 32176.0 |
| 17 | rs55975673          | 43959113 | A     | G   | 1.5647970816190766e-08 | 5.654303271475945  | 32176.0 |
| 17 | rs112638515         | 44016601 | A     | AG  | 1.5654695307121113e-08 | 5.654229468348861  | 32173.0 |
| 17 | rs62055947          | 43852605 | C     | T   | 1.5661091714153657e-08 | 5.6541592946015165 | 32097.0 |
| 17 | rs10514901          | 44194735 | G     | T   | 1.5667656209341226e-08 | 5.654087305729983  | 32110.0 |
| 17 | rs62061851          | 44194891 | C     | T   | 1.5667656209341226e-08 | 5.654087305729983  | 32110.0 |
| 17 | rs56227067          | 43939609 | A     | T   | 1.5671739693320283e-08 | 5.65404253939495   | 32153.0 |
| 17 | rs79115768          | 44021061 | C     | T   | 1.5672401978272502e-08 | 5.654035279978718  | 32176.0 |
| 17 | rs62062774          | 44021463 | T     | C   | 1.5672401978272502e-08 | 5.654035279978718  | 32176.0 |
| 17 | 17:43951599_CAGAT_C | 43951599 | CAGAT | C   | 1.5688968027099458e-08 | 5.653853793615996  | 32111.0 |
| 17 | rs62056841          | 43990041 | A     | C   | 1.5700021600430884e-08 | 5.653732801685147  | 32163.0 |
| 17 | rs2532417           | 44289220 | C     | T   | 1.5706270246174382e-08 | 5.65366444088261   | 32036.0 |
| 17 | rs113271363         | 43996721 | C     | G   | 1.5715730800532446e-08 | 5.653560991738008  | 32177.0 |
| 17 | rs2055794           | 43951717 | G     | A   | 1.5730846078731442e-08 | 5.653395834846817  | 32174.0 |
| 17 | rs76618565          | 44068481 | G     | A   | 1.5740432005334742e-08 | 5.653291174196489  | 32181.0 |

|    |                  |          |    |            |                        |                    |         |
|----|------------------|----------|----|------------|------------------------|--------------------|---------|
| 17 | rs2696599        | 44217226 | A  | G          | 1.574203945539724e-08  | 5.653273629865727  | 32087.0 |
| 17 | rs62062776       | 44022043 | A  | C          | 1.5761119426375143e-08 | 5.6530655164923935 | 32171.0 |
| 17 | rs2055795        | 43951995 | C  | T          | 1.5776833035174098e-08 | 5.652894305129718  | 32175.0 |
| 17 | rs2055796        | 43952191 | A  | T          | 1.5776833035174098e-08 | 5.652894305129718  | 32175.0 |
| 17 | rs62055494       | 43953016 | C  | T          | 1.5776833035174098e-08 | 5.652894305129718  | 32175.0 |
| 17 | rs62055496       | 43953307 | C  | T          | 1.5776833035174098e-08 | 5.652894305129718  | 32175.0 |
| 17 | rs62055497       | 43953529 | A  | G          | 1.5776833035174098e-08 | 5.652894305129718  | 32175.0 |
| 17 | rs113952577      | 44010661 | A  | G          | 1.578255593575453e-08  | 5.652831991047036  | 32175.0 |
| 17 | rs17564871       | 44011018 | A  | G          | 1.578255593575453e-08  | 5.652831991047036  | 32175.0 |
| 17 | rs62060800       | 44145592 | A  | G          | 1.5795120116126962e-08 | 5.652695262299527  | 32175.0 |
| 17 | rs62060801       | 44145860 | A  | G          | 1.5795120116126962e-08 | 5.652695262299527  | 32175.0 |
| 17 | rs17659743       | 44146165 | C  | G          | 1.5795120116126962e-08 | 5.652695262299527  | 32175.0 |
| 17 | rs62060802       | 44146336 | A  | C          | 1.5795120116126962e-08 | 5.652695262299527  | 32175.0 |
| 17 | rs75975083       | 44146357 | T  | C          | 1.5795120116126962e-08 | 5.652695262299527  | 32175.0 |
| 17 | rs77950913       | 44146451 | T  | C          | 1.5795120116126962e-08 | 5.652695262299527  | 32175.0 |
| 17 | rs79782347       | 44146567 | T  | C          | 1.5795120116126962e-08 | 5.652695262299527  | 32175.0 |
| 17 | rs147317628      | 44277476 | C  | CTTT<br>AG | 1.580396539591499e-08  | 5.652599067554778  | 31685.0 |
| 17 | rs76159289       | 44098861 | G  | T          | 1.586188540758542e-08  | 5.651970461495058  | 32186.0 |
| 17 | rs10445337       | 44067400 | T  | C          | 1.5949071794986193e-08 | 5.651028418588432  | 32186.0 |
| 17 | rs79406732       | 43940497 | C  | T          | 1.5950138624160674e-08 | 5.651016922575581  | 32148.0 |
| 17 | rs62061727       | 44017124 | G  | T          | 1.5971152568881555e-08 | 5.650790631135135  | 32186.0 |
| 17 | rs2532239        | 44266227 | T  | C          | 1.597761953287015e-08  | 5.6507210489673625 | 32038.0 |
| 17 | rs17649641       | 43997372 | T  | C          | 1.60194073006468e-08   | 5.6502720862161375 | 32170.0 |
| 17 | rs146122400      | 44782224 | A  | AGT        | 1.6028996400598114e-08 | 5.6501692225445925 | 28928.0 |
| 17 | rs55960528       | 43968994 | T  | C          | 1.6048756396278798e-08 | 5.649957442535808  | 32170.0 |
| 17 | rs55877243       | 43969019 | T  | C          | 1.6048756396278798e-08 | 5.649957442535808  | 32170.0 |
| 17 | 17:44279557_TA_T | 44279557 | TA | T          | 1.60544064964506e-08   | 5.649896933501612  | 32024.0 |
| 17 | rs76402917       | 44126477 | G  | A          | 1.6106252284915896e-08 | 5.649342661229283  | 32108.0 |
| 17 | rs62061710       | 44007727 | C  | T          | 1.6142403389254844e-08 | 5.648957201942871  | 32181.0 |
| 17 | rs62061711       | 44007764 | T  | C          | 1.6142403389254844e-08 | 5.648957201942871  | 32181.0 |
| 17 | 17:44027836_GC_G | 44027836 | GC | G          | 1.615888785845711e-08  | 5.648781715373413  | 32155.0 |
| 17 | rs55719714       | 43939638 | G  | A          | 1.619925910331536e-08  | 5.6483526737219325 | 32152.0 |
| 17 | rs56299858       | 43939659 | G  | A          | 1.619925910331536e-08  | 5.6483526737219325 | 32152.0 |
| 17 | 17:44177304_TA_T | 44177304 | TA | T          | 1.620729958474991e-08  | 5.64826734827466   | 31914.0 |
| 17 | rs62055948       | 43852621 | T  | C          | 1.622487680616186e-08  | 5.648080962194964  | 32095.0 |
| 17 | rs767058         | 43998767 | T  | C          | 1.6232986886003778e-08 | 5.647995030296722  | 32156.0 |
| 17 | rs62055486       | 43949092 | T  | G          | 1.6235100728731368e-08 | 5.647972639523085  | 32173.0 |
| 17 | rs796654785      | 44284962 | A  | AG         | 1.623647201431751e-08  | 5.6479581157630445 | 31910.0 |
| 17 | rs62063849       | 44073062 | T  | G          | 1.625459507484153e-08  | 5.647766279993343  | 32152.0 |
| 17 | rs111372048      | 44136577 | A  | C          | 1.627039029984253e-08  | 5.647599254115653  | 32174.0 |
| 17 | rs17575822       | 44144345 | A  | G          | 1.627039029984253e-08  | 5.647599254115653  | 32174.0 |
| 17 | rs17575850       | 44144387 | C  | A          | 1.627039029984253e-08  | 5.647599254115653  | 32174.0 |
| 17 | rs17659731       | 44144634 | G  | A          | 1.627039029984253e-08  | 5.647599254115653  | 32174.0 |
| 17 | rs75641221       | 44145373 | T  | C          | 1.627039029984253e-08  | 5.647599254115653  | 32174.0 |
| 17 | rs55876817       | 43958139 | A  | C          | 1.6341080297847714e-08 | 5.646853670320683  | 32155.0 |
| 17 | rs76475392       | 44243351 | T  | TCG        | 1.6379073763134556e-08 | 5.646454237654327  | 32075.0 |
| 17 | rs72245049       | 44243354 | A  | AG         | 1.6379073763134556e-08 | 5.646454237654327  | 32075.0 |
| 17 | rs2316773        | 43946536 | C  | T          | 1.6380514611336868e-08 | 5.646439107453866  | 32173.0 |
| 17 | rs17577650       | 44205500 | A  | G          | 1.639441076516199e-08  | 5.646293251665482  | 32104.0 |
| 17 | rs62063200       | 44206482 | C  | T          | 1.639441076516199e-08  | 5.646293251665482  | 32104.0 |
| 17 | rs10514903       | 44206646 | C  | G          | 1.639441076516199e-08  | 5.646293251665482  | 32104.0 |
| 17 | rs17661428       | 44208144 | C  | G          | 1.639441076516199e-08  | 5.646293251665482  | 32104.0 |
| 17 | rs17577877       | 44208218 | A  | G          | 1.639441076516199e-08  | 5.646293251665482  | 32104.0 |
| 17 | rs75676226       | 43947171 | G  | A          | 1.6403527380979158e-08 | 5.6461976277234776 | 31836.0 |



|    |                   |          |     |      |                        |                    |         |
|----|-------------------|----------|-----|------|------------------------|--------------------|---------|
| 17 | rs75229280        | 44196653 | G   | A    | 1.6404335422150246e-08 | 5.646189154691317  | 32105.0 |
| 17 | rs17660251        | 44166646 | C   | T    | 1.6409184489090754e-08 | 5.646138316414134  | 32173.0 |
| 17 | rs113246445       | 43851209 | A   | AT   | 1.6421197753907394e-08 | 5.646012430534867  | 32157.0 |
| 17 | rs147319425       | 44003133 | A   | AAAG | 1.6432988373213812e-08 | 5.645888964677875  | 32180.0 |
| 17 | rs113909426       | 44196822 | G   | A    | 1.644345660958568e-08  | 5.645779418277972  | 32107.0 |
| 17 | rs62062274        | 44093319 | G   | A    | 1.649636026160344e-08  | 5.64522683422776   | 32186.0 |
| 17 | rs138939613       | 43841624 | G   | GATG | 1.654430832282164e-08  | 5.644727496617726  | 32123.0 |
| 17 | rs62062769        | 44019643 | G   | A    | 1.661043824904894e-08  | 5.644041111640657  | 32182.0 |
| 17 | rs62062770        | 44019680 | T   | C    | 1.661043824904894e-08  | 5.644041111640657  | 32182.0 |
| 17 | rs17426195        | 43832367 | G   | A    | 1.6611431584547413e-08 | 5.644030821718526  | 32160.0 |
| 17 | rs2696456         | 44283761 | A   | T    | 1.664125875655792e-08  | 5.643722121303632  | 31990.0 |
| 17 | rs62056837        | 43988884 | T   | C    | 1.6643483274856193e-08 | 5.6436991198831175 | 32174.0 |
| 17 | rs62064422        | 43668017 | G   | A    | 1.6686919721310232e-08 | 5.643250586274861  | 31737.0 |
| 17 | 17:43914979_AC_A  | 43914979 | AC  | A    | 1.6687389276927867e-08 | 5.6432457437454255 | 32032.0 |
| 17 | rs2732630         | 44289150 | A   | C    | 1.6721584235246092e-08 | 5.642893446214223  | 32034.0 |
| 17 | rs55944735        | 43958172 | A   | G    | 1.6723995747974846e-08 | 5.642868627741804  | 32148.0 |
| 17 | rs17649571        | 43994952 | A   | G    | 1.6734881206496987e-08 | 5.642756641523667  | 32177.0 |
| 17 | rs112310745       | 44082432 | G   | A    | 1.674718719253342e-08  | 5.642630126520812  | 31927.0 |
| 17 | rs62062783        | 44023520 | T   | G    | 1.6791184328379537e-08 | 5.642178539361438  | 32177.0 |
| 17 | rs34232924        | 44023828 | C   | CGTG | 1.6791184328379537e-08 | 5.642178539361438  | 32177.0 |
| 17 | rs35163442        | 44023842 | G   | A    | 1.6791184328379537e-08 | 5.642178539361438  | 32177.0 |
| 17 | rs3785884         | 44057595 | G   | A    | 1.6822866179420575e-08 | 5.64185406755858   | 32160.0 |
| 17 | rs75257002        | 43843395 | C   | T    | 1.685757051576501e-08  | 5.641499321132812  | 32091.0 |
| 17 | rs55721252        | 43958099 | T   | C    | 1.690250584143878e-08  | 5.641041046144041  | 32158.0 |
| 17 | rs62055888        | 43838720 | C   | T    | 1.6916241320605208e-08 | 5.640901200316831  | 31975.0 |
| 17 | rs138190012       | 44197417 | T   | TGAA | 1.6920167753531742e-08 | 5.640861244165512  | 32028.0 |
| 17 | rs2532305         | 44223060 | G   | A    | 1.6962463221676373e-08 | 5.640431407199746  | 32090.0 |
| 17 | rs1918797         | 44223243 | G   | A    | 1.6962463221676373e-08 | 5.640431407199746  | 32090.0 |
| 17 | rs1918796         | 44223387 | T   | C    | 1.6962463221676373e-08 | 5.640431407199746  | 32090.0 |
| 17 | rs1918795         | 44224686 | A   | T    | 1.6962463221676373e-08 | 5.640431407199746  | 32090.0 |
| 17 | rs1406071         | 44225485 | T   | C    | 1.6962463221676373e-08 | 5.640431407199746  | 32090.0 |
| 17 | rs1406070         | 44225802 | C   | T    | 1.6962463221676373e-08 | 5.640431407199746  | 32090.0 |
| 17 | rs2696585         | 44226030 | G   | A    | 1.6962463221676373e-08 | 5.640431407199746  | 32090.0 |
| 17 | rs2532304         | 44226126 | A   | C    | 1.6962463221676373e-08 | 5.640431407199746  | 32090.0 |
| 17 | rs367820416       | 43982069 | T   | G    | 1.7030172111224256e-08 | 5.639745462887162  | 32186.0 |
| 17 | rs62056803        | 43982159 | A   | G    | 1.7030172111224256e-08 | 5.639745462887162  | 32186.0 |
| 17 | rs572543580       | 43914981 | C   | G    | 1.7044368887318875e-08 | 5.639601974300356  | 32033.0 |
| 17 | rs9897621         | 44113392 | T   | A    | 1.705168145707174e-08  | 5.6395281105287145 | 30255.0 |
| 17 | rs56042957        | 43992244 | G   | A    | 1.712810750627347e-08  | 5.638757971735994  | 32102.0 |
| 17 | rs55810795        | 43992283 | A   | G    | 1.712810750627347e-08  | 5.638757971735994  | 32102.0 |
| 17 | rs62055893        | 43842494 | A   | G    | 1.7151848427921437e-08 | 5.638519415734012  | 32139.0 |
| 17 | rs62055477        | 43945687 | C   | A    | 1.7153597130754428e-08 | 5.6385018569178875 | 32180.0 |
| 17 | rs78637438        | 43945855 | G   | A    | 1.7153597130754428e-08 | 5.6385018569178875 | 32180.0 |
| 17 | rs2316771         | 43945931 | T   | C    | 1.7153597130754428e-08 | 5.6385018569178875 | 32180.0 |
| 17 | rs62055478        | 43945938 | C   | T    | 1.7153597130754428e-08 | 5.6385018569178875 | 32180.0 |
| 17 | rs12150170        | 44090646 | A   | G    | 1.7175138596374174e-08 | 5.638285700425402  | 32185.0 |
| 17 | rs62062266        | 44090704 | A   | G    | 1.7175138596374174e-08 | 5.638285700425402  | 32185.0 |
| 17 | rs17573858        | 44090796 | T   | C    | 1.7175138596374174e-08 | 5.638285700425402  | 32185.0 |
| 17 | rs62062267        | 44090854 | C   | T    | 1.7175138596374174e-08 | 5.638285700425402  | 32185.0 |
| 17 | rs62062268        | 44090858 | C   | T    | 1.7175138596374174e-08 | 5.638285700425402  | 32185.0 |
| 17 | rs62062269        | 44091092 | G   | C    | 1.7175138596374174e-08 | 5.638285700425402  | 32185.0 |
| 17 | 17:44163547_ACG_A | 44163547 | ACG | A    | 1.7175621622093454e-08 | 5.63828085655253   | 32166.0 |
| 17 | rs111362359       | 43954416 | A   | AC   | 1.7209466550353988e-08 | 5.6379417821939    | 32125.0 |
| 17 | rs78834738        | 44022434 | G   | A    | 1.7231258534628826e-08 | 5.6377238024285194 | 32035.0 |

|    |                 |          |   |             |                        |                    |         |
|----|-----------------|----------|---|-------------|------------------------|--------------------|---------|
| 17 | rs55900347      | 44176092 | G | A           | 1.7247923419902477e-08 | 5.63755728831928   | 32109.0 |
| 17 | rs1815          | 44276578 | T | C           | 1.7289563660488493e-08 | 5.637141904552935  | 31827.0 |
| 17 | rs62062781      | 44022632 | G | A           | 1.732168042233269e-08  | 5.636822185701022  | 32160.0 |
| 17 | 17:44303564_C_T | 44303564 | C | T           | 1.733111974265017e-08  | 5.636728327756746  | 31022.0 |
| 17 | rs2696601       | 44216158 | T | C           | 1.7387372817817178e-08 | 5.636170014200799  | 32181.0 |
| 17 | rs2696587       | 44222460 | T | G           | 1.7399598834126198e-08 | 5.63604890267097   | 32091.0 |
| 17 | rs1467963       | 43978934 | T | G           | 1.7414036377790996e-08 | 5.635905990011746  | 32185.0 |
| 17 | rs62056800      | 43979468 | T | A           | 1.7414036377790996e-08 | 5.635905990011746  | 32185.0 |
| 17 | rs62056801      | 43979504 | G | A           | 1.7414036377790996e-08 | 5.635905990011746  | 32185.0 |
| 17 | rs113834264     | 43979622 | G | A           | 1.7414036377790996e-08 | 5.635905990011746  | 32185.0 |
| 17 | rs2099151       | 43979822 | A | T           | 1.7414036377790996e-08 | 5.635905990011746  | 32185.0 |
| 17 | rs2082068       | 43979971 | C | T           | 1.7414036377790996e-08 | 5.635905990011746  | 32185.0 |
| 17 | rs1984937       | 43980530 | A | C           | 1.7414036377790996e-08 | 5.635905990011746  | 32185.0 |
| 17 | rs62056802      | 43980762 | A | G           | 1.7414036377790996e-08 | 5.635905990011746  | 32185.0 |
| 17 | rs113589236     | 43981795 | G | A           | 1.7414036377790996e-08 | 5.635905990011746  | 32185.0 |
| 17 | rs113029914     | 43981831 | A | T           | 1.7414036377790996e-08 | 5.635905990011746  | 32185.0 |
| 17 | rs112275277     | 43981958 | C | T           | 1.7414036377790996e-08 | 5.635905990011746  | 32185.0 |
| 17 | rs62056804      | 43982286 | C | T           | 1.7414036377790996e-08 | 5.635905990011746  | 32185.0 |
| 17 | rs75617973      | 43983159 | T | C           | 1.7414036377790996e-08 | 5.635905990011746  | 32185.0 |
| 17 | rs62056806      | 43983801 | A | G           | 1.7414036377790996e-08 | 5.635905990011746  | 32185.0 |
| 17 | rs62056807      | 43984253 | G | C           | 1.7414036377790996e-08 | 5.635905990011746  | 32185.0 |
| 17 | rs1467966       | 43984399 | C | T           | 1.7414036377790996e-08 | 5.635905990011746  | 32185.0 |
| 17 | rs79492906      | 43984864 | C | T           | 1.7414036377790996e-08 | 5.635905990011746  | 32185.0 |
| 17 | rs62056811      | 43985247 | C | T           | 1.7414036377790996e-08 | 5.635905990011746  | 32185.0 |
| 17 | rs74509629      | 43985597 | C | T           | 1.7414036377790996e-08 | 5.635905990011746  | 32185.0 |
| 17 | rs79290980      | 43985662 | T | C           | 1.7414036377790996e-08 | 5.635905990011746  | 32185.0 |
| 17 | rs17649700      | 43997901 | G | C           | 1.7422361653633985e-08 | 5.635823633045801  | 32174.0 |
| 17 | rs62058962      | 43998151 | C | T           | 1.7422361653633985e-08 | 5.635823633045801  | 32174.0 |
| 17 | rs1467969       | 43998328 | C | T           | 1.7422361653633985e-08 | 5.635823633045801  | 32174.0 |
| 17 | rs1467970       | 43998574 | T | G           | 1.7422361653633985e-08 | 5.635823633045801  | 32174.0 |
| 17 | rs767057        | 43998822 | A | G           | 1.7422361653633985e-08 | 5.635823633045801  | 32174.0 |
| 17 | rs17649518      | 43994386 | C | A           | 1.743179351684591e-08  | 5.635730375435699  | 32156.0 |
| 17 | rs62055937      | 43848968 | G | T           | 1.7474237499830987e-08 | 5.635311315761906  | 32091.0 |
| 17 | rs112535292     | 44344300 | G | T           | 1.7476816839613408e-08 | 5.6352858811884365 | 30814.0 |
| 17 | rs146453014     | 44172493 | A | AT          | 1.748154659903445e-08  | 5.635239251043206  | 32104.0 |
| 17 | rs2532262       | 44252510 | T | C           | 1.7485540230205692e-08 | 5.63519988783904   | 32000.0 |
| 17 | rs2668668       | 44284641 | T | G           | 1.7495497482224488e-08 | 5.635101782245767  | 31975.0 |
| 17 | rs62061726      | 44016341 | G | A           | 1.750170821264075e-08  | 5.635040617375357  | 32185.0 |
| 17 | rs77561671      | 43976627 | G | T           | 1.7508597887566464e-08 | 5.634972790740013  | 32185.0 |
| 17 | rs62060768      | 44134984 | G | A           | 1.7540127432221545e-08 | 5.634662722848171  | 32179.0 |
| 17 | rs1122380       | 44206079 | C | T           | 1.754635369997522e-08  | 5.634601556477394  | 32100.0 |
| 17 | rs62055515      | 43956370 | G | T           | 1.7559182941920917e-08 | 5.634475589431555  | 32169.0 |
| 17 | rs62055516      | 43956390 | T | C           | 1.7559182941920917e-08 | 5.634475589431555  | 32169.0 |
| 17 | rs62055517      | 43956425 | C | T           | 1.7559182941920917e-08 | 5.634475589431555  | 32169.0 |
| 17 | rs62055518      | 43956505 | A | C           | 1.7559182941920917e-08 | 5.634475589431555  | 32169.0 |
| 17 | rs56364632      | 43956642 | T | C           | 1.7559182941920917e-08 | 5.634475589431555  | 32169.0 |
| 17 | rs55768605      | 43956734 | C | A<br>CAAA   | 1.7559182941920917e-08 | 5.634475589431555  | 32169.0 |
| 17 | rs535791904     | 43958207 | C | AAAA        | 1.7568070113343078e-08 | 5.634388380957434  | 32171.0 |
| 17 | rs55780786      | 44209875 | T | C           | 1.757609704295297e-08  | 5.634309650720012  | 32106.0 |
| 17 | rs3089          | 44209919 | C | G           | 1.757609704295297e-08  | 5.634309650720012  | 32106.0 |
| 17 | rs113260576     | 44193908 | C | CCAA<br>CAA | 1.765699868539633e-08  | 5.633518089782053  | 32182.0 |
| 17 | rs17573266      | 44072881 | C | G           | 1.766723790285813e-08  | 5.633418158024321  | 32182.0 |
| 17 | rs62062782      | 44023087 | G | A           | 1.770470713891394e-08  | 5.6330529481280625 | 32176.0 |
| 17 | rs1476554       | 44159102 | C | T           | 1.7717587672235054e-08 | 5.6329275758485675 | 32186.0 |

|    |                     |          |       |      |                        |                    |         |
|----|---------------------|----------|-------|------|------------------------|--------------------|---------|
| 17 | rs145503157         | 43859929 | C     | CACG | 1.771908166179805e-08  | 5.632913039875293  | 32139.0 |
| 17 | rs17564983          | 44011825 | A     | C    | 1.7720575774907004e-08 | 5.632898503890213  | 32174.0 |
| 17 | 17:44007773_CAAAA_C | 44007773 | CAAAA | C    | 1.7739636550946084e-08 | 5.632713169045707  | 32175.0 |
| 17 | rs2732669           | 44284542 | G     | A    | 1.7746742763866594e-08 | 5.632644122240447  | 32013.0 |
| 17 | rs111555239         | 44006453 | C     | CT   | 1.775796878438311e-08  | 5.632535100426687  | 32174.0 |
| 17 | rs112791677         | 44001549 | G     | GC   | 1.7774321327612724e-08 | 5.632376411933286  | 32182.0 |
| 17 | rs55895732          | 43968937 | T     | C    | 1.7780191869506874e-08 | 5.632319477550741  | 32184.0 |
| 17 | rs41384744          | 44137070 | A     | G    | 1.77845023072101e-08   | 5.632277685175954  | 32177.0 |
| 17 | rs1560310           | 43978534 | G     | A    | 1.7799565646333607e-08 | 5.632131713941879  | 32186.0 |
| 17 | rs56371647          | 43855503 | C     | T    | 1.7825095593688503e-08 | 5.6318845898029695 | 32133.0 |
| 17 | rs62063851          | 44074435 | C     | G    | 1.7839691302145328e-08 | 5.631743461006758  | 32165.0 |
| 17 | rs55967721          | 43948977 | G     | A    | 1.784044332973342e-08  | 5.631736192540767  | 32095.0 |
| 17 | rs77924424          | 44012915 | T     | C    | 1.7895676838661088e-08 | 5.6312031636569895 | 32180.0 |
| 17 | rs76475191          | 44290849 | T     | A    | 1.7904856785074718e-08 | 5.631114727784213  | 32064.0 |
| 17 | rs56338487          | 43960812 | A     | T    | 1.7910895430667437e-08 | 5.631056577931129  | 32186.0 |
| 17 | rs62055538          | 43960997 | T     | C    | 1.7910895430667437e-08 | 5.631056577931129  | 32186.0 |
| 17 | rs62055539          | 43961044 | A     | G    | 1.7910895430667437e-08 | 5.631056577931129  | 32186.0 |
| 17 | rs62055540          | 43961142 | T     | C    | 1.7910895430667437e-08 | 5.631056577931129  | 32186.0 |
| 17 | rs17770108          | 43961292 | G     | T    | 1.7910895430667437e-08 | 5.631056577931129  | 32186.0 |
| 17 | rs62055541          | 43962017 | G     | C    | 1.7910895430667437e-08 | 5.631056577931129  | 32186.0 |
| 17 | rs77129180          | 43963046 | G     | A    | 1.7910895430667437e-08 | 5.631056577931129  | 32186.0 |
| 17 | rs80254317          | 43963282 | C     | G    | 1.7910895430667437e-08 | 5.631056577931129  | 32186.0 |
| 17 | rs112425426         | 43963416 | C     | G    | 1.7910895430667437e-08 | 5.631056577931129  | 32186.0 |
| 17 | rs62055542          | 43963844 | C     | T    | 1.7910895430667437e-08 | 5.631056577931129  | 32186.0 |
| 17 | rs17770120          | 43963943 | C     | A    | 1.7910895430667437e-08 | 5.631056577931129  | 32186.0 |
| 17 | rs17770150          | 43964163 | G     | A    | 1.7910895430667437e-08 | 5.631056577931129  | 32186.0 |
| 17 | rs17691449          | 43964283 | G     | C    | 1.7910895430667437e-08 | 5.631056577931129  | 32186.0 |
| 17 | rs62055548          | 43964899 | A     | G    | 1.7910895430667437e-08 | 5.631056577931129  | 32186.0 |
| 17 | rs113327263         | 43965063 | T     | C    | 1.7910895430667437e-08 | 5.631056577931129  | 32186.0 |
| 17 | rs62055549          | 43965595 | G     | C    | 1.7910895430667437e-08 | 5.631056577931129  | 32186.0 |
| 17 | rs62055552          | 43965955 | A     | G    | 1.7910895430667437e-08 | 5.631056577931129  | 32186.0 |
| 17 | rs62055553          | 43966178 | C     | A    | 1.7910895430667437e-08 | 5.631056577931129  | 32186.0 |
| 17 | rs62055554          | 43966260 | A     | G    | 1.7910895430667437e-08 | 5.631056577931129  | 32186.0 |
| 17 | rs62055555          | 43966282 | G     | T    | 1.7910895430667437e-08 | 5.631056577931129  | 32186.0 |
| 17 | rs111941646         | 43966608 | A     | T    | 1.7910895430667437e-08 | 5.631056577931129  | 32186.0 |
| 17 | rs62055556          | 43966749 | T     | C    | 1.7910895430667437e-08 | 5.631056577931129  | 32186.0 |
| 17 | rs62055557          | 43966795 | C     | A    | 1.7910895430667437e-08 | 5.631056577931129  | 32186.0 |
| 17 | rs62055558          | 43966955 | A     | G    | 1.7910895430667437e-08 | 5.631056577931129  | 32186.0 |
| 17 | rs62055559          | 43967138 | T     | G    | 1.7910895430667437e-08 | 5.631056577931129  | 32186.0 |
| 17 | rs17691466          | 43968219 | A     | G    | 1.7910895430667437e-08 | 5.631056577931129  | 32186.0 |
| 17 | rs17691508          | 43968463 | C     | G    | 1.7910895430667437e-08 | 5.631056577931129  | 32186.0 |
| 17 | rs55943606          | 43968874 | A     | G    | 1.7910895430667437e-08 | 5.631056577931129  | 32186.0 |
| 17 | rs112297913         | 43969258 | G     | GC   | 1.7910895430667437e-08 | 5.631056577931129  | 32186.0 |
| 17 | rs17691610          | 43970662 | G     | T    | 1.7910895430667437e-08 | 5.631056577931129  | 32186.0 |
| 17 | rs76594404          | 43971457 | G     | C    | 1.7910895430667437e-08 | 5.631056577931129  | 32186.0 |
| 17 | rs80233201          | 43971481 | T     | C    | 1.7910895430667437e-08 | 5.631056577931129  | 32186.0 |
| 17 | rs62056778          | 43971604 | C     | G    | 1.7910895430667437e-08 | 5.631056577931129  | 32186.0 |
| 17 | rs11575895          | 43971785 | A     | G    | 1.7910895430667437e-08 | 5.631056577931129  | 32186.0 |
| 17 | rs62056779          | 43971937 | C     | A    | 1.7910895430667437e-08 | 5.631056577931129  | 32186.0 |
| 17 | rs11575896          | 43972142 | G     | A    | 1.7910895430667437e-08 | 5.631056577931129  | 32186.0 |
| 17 | rs111972148         | 43973121 | G     | C    | 1.7910895430667437e-08 | 5.631056577931129  | 32186.0 |
| 17 | rs76324150          | 43973233 | C     | T    | 1.7910895430667437e-08 | 5.631056577931129  | 32186.0 |
| 17 | rs113347741         | 43973408 | C     | T    | 1.7910895430667437e-08 | 5.631056577931129  | 32186.0 |
| 17 | rs78720789          | 43973413 | A     | G    | 1.7910895430667437e-08 | 5.631056577931129  | 32186.0 |

|    |                  |          |    |    |                        |                    |         |
|----|------------------|----------|----|----|------------------------|--------------------|---------|
| 17 | rs62056780       | 43973652 | C  | T  | 1.7910895430667437e-08 | 5.631056577931129  | 32186.0 |
| 17 | rs62056781       | 43973899 | T  | C  | 1.7910895430667437e-08 | 5.631056577931129  | 32186.0 |
| 17 | rs74496580       | 43974065 | C  | A  | 1.7910895430667437e-08 | 5.631056577931129  | 32186.0 |
| 17 | rs62056782       | 43974230 | C  | T  | 1.7910895430667437e-08 | 5.631056577931129  | 32186.0 |
| 17 | rs80346216       | 43974476 | G  | T  | 1.7910895430667437e-08 | 5.631056577931129  | 32186.0 |
| 17 | rs76632685       | 43974477 | A  | T  | 1.7910895430667437e-08 | 5.631056577931129  | 32186.0 |
| 17 | rs62056783       | 43974549 | G  | C  | 1.7910895430667437e-08 | 5.631056577931129  | 32186.0 |
| 17 | rs62056784       | 43974889 | C  | G  | 1.7910895430667437e-08 | 5.631056577931129  | 32186.0 |
| 17 | rs62056785       | 43975263 | T  | C  | 1.7910895430667437e-08 | 5.631056577931129  | 32186.0 |
| 17 | rs62056786       | 43975285 | T  | C  | 1.7910895430667437e-08 | 5.631056577931129  | 32186.0 |
| 17 | rs62056789       | 43975415 | A  | C  | 1.7910895430667437e-08 | 5.631056577931129  | 32186.0 |
| 17 | rs62056790       | 43975417 | G  | A  | 1.7910895430667437e-08 | 5.631056577931129  | 32186.0 |
| 17 | rs62056791       | 43976064 | T  | C  | 1.7910895430667437e-08 | 5.631056577931129  | 32186.0 |
| 17 | rs62056792       | 43976644 | G  | A  | 1.7910895430667437e-08 | 5.631056577931129  | 32186.0 |
| 17 | rs62056793       | 43977018 | A  | G  | 1.7910895430667437e-08 | 5.631056577931129  | 32186.0 |
| 17 | rs62056794       | 43977049 | A  | G  | 1.7910895430667437e-08 | 5.631056577931129  | 32186.0 |
| 17 | rs1864324        | 43977702 | C  | T  | 1.7910895430667437e-08 | 5.631056577931129  | 32186.0 |
| 17 | rs1864325        | 43977827 | C  | T  | 1.7910895430667437e-08 | 5.631056577931129  | 32186.0 |
| 17 | rs62056795       | 43978041 | C  | T  | 1.7910895430667437e-08 | 5.631056577931129  | 32186.0 |
| 17 | rs62056796       | 43978120 | A  | G  | 1.7910895430667437e-08 | 5.631056577931129  | 32186.0 |
| 17 | rs62059007       | 44005615 | A  | G  | 1.7917376615223474e-08 | 5.6309941877745135 | 32182.0 |
| 17 | rs113139571      | 44099856 | G  | GC | 1.7930534825883564e-08 | 5.630867589603918  | 32162.0 |
| 17 | rs12150336       | 44125704 | C  | T  | 1.7937148986130492e-08 | 5.6308039873142635 | 32175.0 |
| 17 | rs35134656       | 44103927 | C  | CT | 1.7962367713696416e-08 | 5.63056169080707   | 32168.0 |
| 17 | rs34043286       | 44117119 | A  | G  | 1.797044504782219e-08  | 5.6304841552320575 | 32186.0 |
| 17 | rs113518470      | 43850932 | C  | T  | 1.7971581208575324e-08 | 5.63047325176488   | 32155.0 |
| 17 | rs12150515       | 44090685 | G  | T  | 1.7975937144094745e-08 | 5.630431455079186  | 32184.0 |
| 17 | rs754512         | 44055647 | A  | T  | 1.798408362717603e-08  | 5.63035331318761   | 32174.0 |
| 17 | rs62060762       | 44133396 | G  | A  | 1.801847763417664e-08  | 5.630023780837887  | 32182.0 |
| 17 | rs62060763       | 44133403 | T  | C  | 1.801847763417664e-08  | 5.630023780837887  | 32182.0 |
| 17 | rs75944932       | 44072423 | A  | C  | 1.8041780737843905e-08 | 5.6298008584552655 | 32179.0 |
| 17 | 17:44012257_CG_C | 44012257 | CG | C  | 1.8045012574997114e-08 | 5.629769964101674  | 32158.0 |
| 17 | 17:44250669_TA_T | 44250669 | TA | T  | 1.8048118208213343e-08 | 5.629740281241128  | 32001.0 |
| 17 | rs10445370       | 43935118 | G  | A  | 1.8095274032255358e-08 | 5.629290186119532  | 32180.0 |
| 17 | rs56347602       | 43939255 | T  | C  | 1.811193112930293e-08  | 5.629131468855238  | 32180.0 |
| 17 | rs62061730       | 44017342 | A  | G  | 1.811193112930293e-08  | 5.629131468855238  | 32178.0 |
| 17 | rs1076222        | 44109769 | C  | G  | 1.814350636491146e-08  | 5.6288309926228415 | 32175.0 |
| 17 | rs111459873      | 44113787 | T  | TG | 1.815593479385414e-08  | 5.6287128604646375 | 32185.0 |
| 17 | rs62060844       | 44153836 | C  | T  | 1.8160780955131198e-08 | 5.628666819002093  | 32165.0 |
| 17 | rs74825921       | 44153909 | A  | G  | 1.8176092951851927e-08 | 5.628521424132329  | 32185.0 |
| 17 | 17:43849572_AT_A | 43849572 | AT | A  | 1.8213277140201245e-08 | 5.628168836668515  | 32143.0 |
| 17 | rs62060796       | 44143029 | G  | T  | 1.8215963419373868e-08 | 5.62814339194367   | 32183.0 |
| 17 | rs55894109       | 43957221 | C  | T  | 1.8217882428089383e-08 | 5.628125217118069  | 32185.0 |
| 17 | rs56249780       | 43957328 | C  | T  | 1.8217882428089383e-08 | 5.628125217118069  | 32185.0 |
| 17 | rs56387391       | 43959261 | G  | A  | 1.8217882428089383e-08 | 5.628125217118069  | 32185.0 |
| 17 | rs2019816        | 43959661 | G  | A  | 1.8217882428089383e-08 | 5.628125217118069  | 32185.0 |
| 17 | rs2006305        | 43959752 | A  | T  | 1.8217882428089383e-08 | 5.628125217118069  | 32185.0 |
| 17 | rs2019822        | 43959918 | T  | A  | 1.8217882428089383e-08 | 5.628125217118069  | 32185.0 |
| 17 | rs62055529       | 43960020 | A  | G  | 1.8217882428089383e-08 | 5.628125217118069  | 32185.0 |
| 17 | rs79580365       | 43960172 | C  | T  | 1.8217882428089383e-08 | 5.628125217118069  | 32185.0 |
| 17 | rs55937610       | 43960283 | A  | G  | 1.8217882428089383e-08 | 5.628125217118069  | 32185.0 |
| 17 | rs56194412       | 43960600 | T  | C  | 1.8217882428089383e-08 | 5.628125217118069  | 32185.0 |
| 17 | rs79412431       | 43940021 | G  | A  | 1.8241438406225568e-08 | 5.627902271089016  | 31659.0 |
| 17 | rs12150570       | 44126218 | G  | A  | 1.825284304586086e-08  | 5.6277944320676605 | 32178.0 |

|    |                    |          |      |    |                        |                    |         |
|----|--------------------|----------|------|----|------------------------|--------------------|---------|
| 17 | 17:44168295_CTTA_C | 44168295 | CTTA | C  | 1.8265344918702985e-08 | 5.6276762930681885 | 32032.0 |
| 17 | rs369585371        | 44215416 | A    | AG | 1.828388878168477e-08  | 5.627501203578409  | 32132.0 |
| 17 | rs111321973        | 43953170 | C    | T  | 1.828440236913505e-08  | 5.627496356786163  | 32183.0 |
| 17 | rs112950348        | 44033188 | G    | A  | 1.8291144515970435e-08 | 5.627432742516301  | 31709.0 |
| 17 | rs41382552         | 44118999 | A    | G  | 1.82980818390558e-08   | 5.627367310460005  | 32177.0 |
| 17 | rs77768866         | 44121917 | C    | T  | 1.82980818390558e-08   | 5.627367310460005  | 32177.0 |
| 17 | rs112281640        | 44081218 | C    | CT | 1.8314214660058785e-08 | 5.6272152405904325 | 32010.0 |
| 17 | rs79765413         | 44022433 | T    | C  | 1.831640105485157e-08  | 5.627194641385243  | 32036.0 |
| 17 | rs62055488         | 43950394 | C    | T  | 1.832218980611719e-08  | 5.6271401139629456 | 32183.0 |
| 17 | rs62055490         | 43950533 | A    | G  | 1.832218980611719e-08  | 5.6271401139629456 | 32183.0 |
| 17 | rs10491140         | 43950976 | G    | T  | 1.832218980611719e-08  | 5.6271401139629456 | 32183.0 |
| 17 | rs62055491         | 43951120 | T    | C  | 1.832218980611719e-08  | 5.6271401139629456 | 32183.0 |
| 17 | rs34416056         | 43951220 | T    | G  | 1.832218980611719e-08  | 5.6271401139629456 | 32183.0 |
| 17 | rs62055492         | 43951345 | C    | A  | 1.832218980611719e-08  | 5.6271401139629456 | 32183.0 |
| 17 | 17:44045574_AC_A   | 44045574 | AC   | A  | 1.8343430581064684e-08 | 5.62694017866005   | 32179.0 |
| 17 | rs62061712         | 44009876 | C    | A  | 1.8356186635108443e-08 | 5.626820216406343  | 32184.0 |
| 17 | rs7501759          | 44009921 | A    | G  | 1.8356186635108443e-08 | 5.626820216406343  | 32184.0 |
| 17 | rs2316782          | 44010040 | A    | G  | 1.8356186635108443e-08 | 5.626820216406343  | 32184.0 |
| 17 | rs2316783          | 44010118 | G    | C  | 1.8356186635108443e-08 | 5.626820216406343  | 32184.0 |
| 17 | rs4255816          | 44010364 | C    | G  | 1.8356186635108443e-08 | 5.626820216406343  | 32184.0 |
| 17 | rs62061713         | 44010405 | A    | G  | 1.8356186635108443e-08 | 5.626820216406343  | 32184.0 |
| 17 | rs62061714         | 44010452 | C    | A  | 1.8356186635108443e-08 | 5.626820216406343  | 32184.0 |
| 17 | rs78077519         | 44010984 | G    | A  | 1.8356186635108443e-08 | 5.626820216406343  | 32184.0 |
| 17 | rs17650258         | 44011073 | G    | A  | 1.8356186635108443e-08 | 5.626820216406343  | 32184.0 |
| 17 | rs62061715         | 44011526 | A    | G  | 1.8356186635108443e-08 | 5.626820216406343  | 32184.0 |
| 17 | rs17564948         | 44011749 | A    | G  | 1.8356186635108443e-08 | 5.626820216406343  | 32184.0 |
| 17 | rs62061716         | 44012096 | A    | G  | 1.8356186635108443e-08 | 5.626820216406343  | 32184.0 |
| 17 | rs17650335         | 44012343 | G    | A  | 1.8356186635108443e-08 | 5.626820216406343  | 32184.0 |
| 17 | rs17650417         | 44013103 | G    | T  | 1.8356186635108443e-08 | 5.626820216406343  | 32184.0 |
| 17 | rs62061720         | 44013189 | C    | T  | 1.8356186635108443e-08 | 5.626820216406343  | 32184.0 |
| 17 | rs12150111         | 44013938 | A    | G  | 1.8356186635108443e-08 | 5.626820216406343  | 32184.0 |
| 17 | rs12150460         | 44014137 | G    | T  | 1.8356186635108443e-08 | 5.626820216406343  | 32184.0 |
| 17 | rs12150195         | 44014263 | T    | C  | 1.8356186635108443e-08 | 5.626820216406343  | 32184.0 |
| 17 | rs55874169         | 44014384 | G    | A  | 1.8356186635108443e-08 | 5.626820216406343  | 32184.0 |
| 17 | rs62063856         | 44076466 | A    | G  | 1.83700477573754e-08   | 5.626689953452677  | 32146.0 |
| 17 | rs80348388         | 43952634 | A    | T  | 1.8389535135268136e-08 | 5.62650697784233   | 32184.0 |
| 17 | rs62055493         | 43952944 | T    | C  | 1.8389535135268136e-08 | 5.62650697784233   | 32184.0 |
| 17 | rs62055495         | 43953043 | A    | C  | 1.8389535135268136e-08 | 5.62650697784233   | 32184.0 |
| 17 | rs62055498         | 43953814 | G    | A  | 1.8389535135268136e-08 | 5.62650697784233   | 32184.0 |
| 17 | rs62055499         | 43953991 | C    | G  | 1.8389535135268136e-08 | 5.62650697784233   | 32184.0 |
| 17 | rs62055500         | 43954134 | G    | A  | 1.8389535135268136e-08 | 5.62650697784233   | 32184.0 |
| 17 | rs62055501         | 43954227 | G    | A  | 1.8389535135268136e-08 | 5.62650697784233   | 32184.0 |
| 17 | rs62055502         | 43954284 | G    | A  | 1.8389535135268136e-08 | 5.62650697784233   | 32184.0 |
| 17 | rs916793           | 43954686 | G    | A  | 1.8389535135268136e-08 | 5.62650697784233   | 32184.0 |
| 17 | rs4441322          | 43955030 | A    | G  | 1.8389535135268136e-08 | 5.62650697784233   | 32184.0 |
| 17 | rs113414067        | 43955093 | T    | C  | 1.8389535135268136e-08 | 5.62650697784233   | 32184.0 |
| 17 | rs55905252         | 43955365 | C    | A  | 1.8389535135268136e-08 | 5.62650697784233   | 32184.0 |
| 17 | 17:43848646_AG_A   | 43848646 | AG   | A  | 1.839631529652097e-08  | 5.6264433600561485 | 31962.0 |
| 17 | rs78681971         | 44106219 | C    | T  | 1.8409689081199895e-08 | 5.626317941472553  | 32181.0 |
| 17 | rs74548327         | 43973080 | A    | G  | 1.841570069675768e-08  | 5.626261593706863  | 32184.0 |
| 17 | rs62064664         | 44081462 | T    | C  | 1.841932152285706e-08  | 5.626227663783895  | 32180.0 |
| 17 | rs62063673         | 44125484 | T    | G  | 1.8439378014487505e-08 | 5.626039836261129  | 32177.0 |
| 17 | rs2158072          | 43950195 | T    | C  | 1.844222647739435e-08  | 5.626013176711074  | 32182.0 |
| 17 | rs2040845          | 43767188 | G    | C  | 1.84429386605418e-08   | 5.626006511817354  | 31947.0 |

|    |                                                         |          |                                             |   |                        |                    |         |
|----|---------------------------------------------------------|----------|---------------------------------------------|---|------------------------|--------------------|---------|
| 17 | rs62062768                                              | 44019479 | C                                           | G | 1.8472680175585146e-08 | 5.625728401767181  | 32182.0 |
| 17 | rs62061719                                              | 44012989 | C                                           | T | 1.847832275616277e-08  | 5.625675687610405  | 32183.0 |
| 17 | rs17650381                                              | 44013024 | T                                           | C | 1.847832275616277e-08  | 5.625675687610405  | 32183.0 |
| 17 | rs62061721                                              | 44013346 | T                                           | C | 1.847832275616277e-08  | 5.625675687610405  | 32183.0 |
| 17 | rs56318865                                              | 44147411 | G                                           | A | 1.851396839060105e-08  | 5.625343039523072  | 32185.0 |
| 17 | rs56041778                                              | 44147511 | G                                           | C | 1.851396839060105e-08  | 5.625343039523072  | 32185.0 |
| 17 | rs55947022                                              | 44147574 | G                                           | A | 1.851396839060105e-08  | 5.625343039523072  | 32185.0 |
| 17 | rs55929190                                              | 44147599 | G                                           | C | 1.851396839060105e-08  | 5.625343039523072  | 32185.0 |
| 17 | rs56323408                                              | 44147721 | C                                           | T | 1.851396839060105e-08  | 5.625343039523072  | 32185.0 |
| 17 | rs12150125                                              | 43986432 | G                                           | A | 1.855033259128316e-08  | 5.6250043259200275 | 32121.0 |
| 17 | rs62060794                                              | 44142566 | C                                           | T | 1.8568182475249623e-08 | 5.624838299380213  | 32183.0 |
| 17 | rs10445336                                              | 43934948 | A                                           | G | 1.8577635395850848e-08 | 5.624750437996989  | 32171.0 |
| 17 | rs55836887                                              | 43668815 | A                                           | G | 1.8614710239923808e-08 | 5.6244062595973165 | 31812.0 |
| 17 | rs62062323                                              | 44113224 | C                                           | T | 1.862013393913532e-08  | 5.6243559653685296 | 32184.0 |
| 17 | rs9896485                                               | 44050828 | G                                           | C | 1.8620330005472286e-08 | 5.624354147502191  | 31249.0 |
| 17 | 17:44221042_C_T                                         | 44221042 | C                                           | T | 1.862170252651901e-08  | 5.624341422432661  | 32158.0 |
| 17 | rs56040418                                              | 43958079 | C                                           | T | 1.8629808959205825e-08 | 5.624266283742441  | 32172.0 |
| 17 | rs17564153                                              | 43995098 | G                                           | A | 1.8642891143266973e-08 | 5.624145091641967  | 32171.0 |
| 17 | rs62063305                                              | 44050282 | G                                           | A | 1.864544321857753e-08  | 5.624121459086771  | 32185.0 |
| 17 | rs17651134                                              | 44050340 | G                                           | A | 1.864544321857753e-08  | 5.624121459086771  | 32185.0 |
| 17 | rs62063306                                              | 44050395 | C                                           | A | 1.864544321857753e-08  | 5.624121459086771  | 32185.0 |
| 17 | rs62063774                                              | 44050463 | T                                           | C | 1.864544321857753e-08  | 5.624121459086771  | 32185.0 |
| 17 | rs62063775                                              | 44050823 | G                                           | T | 1.864544321857753e-08  | 5.624121459086771  | 32185.0 |
| 17 | rs62063776                                              | 44050850 | A                                           | G | 1.864544321857753e-08  | 5.624121459086771  | 32185.0 |
| 17 | rs1800547                                               | 44051846 | A                                           | G | 1.864544321857753e-08  | 5.624121459086771  | 32185.0 |
| 17 | rs17651213                                              | 44051924 | G                                           | A | 1.864544321857753e-08  | 5.624121459086771  | 32185.0 |
| 17 | rs17572361                                              | 44052009 | T                                           | C | 1.864544321857753e-08  | 5.624121459086771  | 32185.0 |
| 17 | rs17651243                                              | 44052284 | G                                           | A | 1.864544321857753e-08  | 5.624121459086771  | 32185.0 |
| 17 | rs62063777                                              | 44053171 | A                                           | G | 1.864544321857753e-08  | 5.624121459086771  | 32185.0 |
| 17 | rs2217394                                               | 44053448 | A                                           | G | 1.864544321857753e-08  | 5.624121459086771  | 32185.0 |
| 17 | rs62063778                                              | 44053989 | G                                           | A | 1.864544321857753e-08  | 5.624121459086771  | 32185.0 |
| 17 | rs17651285                                              | 44054237 | G                                           | A | 1.864544321857753e-08  | 5.624121459086771  | 32185.0 |
| 17 | rs112578465                                             | 44125066 | C                                           | T | 1.865722646795108e-08  | 5.624012385350765  | 32176.0 |
| 17 | rs62063680                                              | 44131559 | C                                           | A | 1.866010792830025e-08  | 5.623985722780873  | 32181.0 |
| 17 | rs62060850                                              | 44157982 | A                                           | T | 1.8664627460828654e-08 | 5.623943910943562  | 32184.0 |
| 17 | rs62060851                                              | 44157992 | T                                           | C | 1.8664627460828654e-08 | 5.623943910943562  | 32184.0 |
| 17 | rs77138434                                              | 44159555 | C                                           | A | 1.8664627460828654e-08 | 5.623943910943562  | 32184.0 |
| 17 | rs111913701                                             | 44159631 | T                                           | G | 1.8664627460828654e-08 | 5.623943910943562  | 32184.0 |
| 17 | rs111519055                                             | 44159672 | A                                           | G | 1.8664627460828654e-08 | 5.623943910943562  | 32184.0 |
| 17 | rs77925835                                              | 44159695 | C                                           | T | 1.8664627460828654e-08 | 5.623943910943562  | 32184.0 |
| 17 | rs17659953                                              | 44159725 | C                                           | T | 1.8664627460828654e-08 | 5.623943910943562  | 32184.0 |
| 17 | rs17576165                                              | 44159849 | T                                           | C | 1.8664627460828654e-08 | 5.623943910943562  | 32184.0 |
| 17 | rs17576200                                              | 44159988 | G                                           | A | 1.8664627460828654e-08 | 5.623943910943562  | 32184.0 |
| 17 | rs62060852                                              | 44160050 | G                                           | A | 1.8664627460828654e-08 | 5.623943910943562  | 32184.0 |
| 17 | rs62060853                                              | 44160592 | G                                           | A | 1.8664627460828654e-08 | 5.623943910943562  | 32184.0 |
| 17 | rs17660017                                              | 44160674 | G                                           | C | 1.8664627460828654e-08 | 5.623943910943562  | 32184.0 |
| 17 | rs55987700                                              | 44161146 | T                                           | G | 1.8664627460828654e-08 | 5.623943910943562  | 32184.0 |
| 17 | rs113788190                                             | 44161302 | A                                           | G | 1.8664627460828654e-08 | 5.623943910943562  | 32184.0 |
| 17 | rs112364920                                             | 44161360 | A                                           | T | 1.8664627460828654e-08 | 5.623943910943562  | 32184.0 |
| 17 | 17:44161478_CTCACACCTGTAATCCCAACTTTGGGAAGCTGAGCGGGTGA_C | 44161478 | CTCACACCTGTAATCCCAACTTTGGGAAGCTGAGCGGGTGA_C | C | 1.8664627460828654e-08 | 5.623943910943562  | 32184.0 |
| 17 | rs113955100                                             | 44161522 | A                                           | C | 1.8664627460828654e-08 | 5.623943910943562  | 32184.0 |
| 17 | rs62060855                                              | 44161860 | C                                           | T | 1.8664627460828654e-08 | 5.623943910943562  | 32184.0 |

|    |                    |          |      |   |                        |                    |         |
|----|--------------------|----------|------|---|------------------------|--------------------|---------|
| 17 | rs62060856         | 44161875 | A    | C | 1.8664627460828654e-08 | 5.623943910943562  | 32184.0 |
| 17 | rs2316955          | 44161985 | T    | G | 1.8664627460828654e-08 | 5.623943910943562  | 32184.0 |
| 17 | rs17660065         | 44162284 | T    | C | 1.8664627460828654e-08 | 5.623943910943562  | 32184.0 |
| 17 | rs55864131         | 44163411 | T    | C | 1.8664627460828654e-08 | 5.623943910943562  | 32184.0 |
| 17 | 17:44163551_AGT_A  | 44163551 | AGT  | A | 1.8664627460828654e-08 | 5.623943910943562  | 32184.0 |
| 17 | 17:44179168_AACC_A | 44179168 | AACC | A | 1.8664627460828654e-08 | 5.623943910943562  | 32184.0 |
| 17 | rs62056840         | 43989689 | T    | C | 1.8711195191868134e-08 | 5.623513667524141  | 32174.0 |
| 17 | rs17770296         | 43969136 | C    | T | 1.8721113715652386e-08 | 5.623422163716851  | 32179.0 |
| 17 | rs62061858         | 44200033 | T    | C | 1.872144223176493e-08  | 5.623419133781455  | 32083.0 |
| 17 | rs55653657         | 43956778 | A    | G | 1.875300611349402e-08  | 5.623128257595542  | 32166.0 |
| 17 | rs12150527         | 43986462 | A    | G | 1.876327560670554e-08  | 5.623033721817364  | 32168.0 |
| 17 | 17:44104410_TCTC_T | 44104410 | TCTC | T | 1.8833003425946265e-08 | 5.62239316816773   | 32180.0 |
| 17 | rs78938131         | 44157622 | T    | G | 1.883472178328147e-08  | 5.622377411592308  | 32185.0 |
| 17 | 17:44157676_CT_C   | 44157676 | CT   | C | 1.883472178328147e-08  | 5.622377411592308  | 32185.0 |
| 17 | rs62055547         | 43964755 | C    | T | 1.8837101301106704e-08 | 5.622355594772682  | 32184.0 |
| 17 | rs17691556         | 43969168 | T    | A | 1.8853303073623486e-08 | 5.622207118488356  | 32181.0 |
| 17 | rs12150576         | 44015624 | G    | A | 1.888117559214277e-08  | 5.621951978813066  | 32185.0 |
| 17 | rs12150242         | 44015816 | A    | G | 1.888117559214277e-08  | 5.621951978813066  | 32185.0 |
| 17 | rs12150104         | 44015929 | G    | A | 1.888117559214277e-08  | 5.621951978813066  | 32185.0 |
| 17 | rs62061725         | 44016157 | G    | C | 1.888117559214277e-08  | 5.621951978813066  | 32185.0 |
| 17 | rs113537106        | 44016462 | A    | G | 1.888117559214277e-08  | 5.621951978813066  | 32185.0 |
| 17 | rs62061728         | 44017180 | T    | G | 1.888117559214277e-08  | 5.621951978813066  | 32185.0 |
| 17 | rs62061731         | 44017666 | C    | A | 1.888117559214277e-08  | 5.621951978813066  | 32185.0 |
| 17 | rs62061732         | 44017941 | G    | T | 1.888117559214277e-08  | 5.621951978813066  | 32185.0 |
| 17 | rs62062791         | 44025273 | G    | A | 1.8881374353589016e-08 | 5.621950160702569  | 32182.0 |
| 17 | rs62062792         | 44025347 | T    | C | 1.8881374353589016e-08 | 5.621950160702569  | 32182.0 |
| 17 | rs78026984         | 44025592 | G    | C | 1.8881374353589016e-08 | 5.621950160702569  | 32182.0 |
| 17 | rs113395365        | 44025650 | T    | C | 1.8881374353589016e-08 | 5.621950160702569  | 32182.0 |
| 17 | rs62063681         | 44131592 | A    | G | 1.8882235676899308e-08 | 5.6219422822216085 | 32182.0 |
| 17 | rs62063682         | 44131622 | G    | A | 1.8882235676899308e-08 | 5.6219422822216085 | 32182.0 |
| 17 | rs62063683         | 44131717 | G    | A | 1.8882235676899308e-08 | 5.6219422822216085 | 32182.0 |
| 17 | rs79180862         | 44131798 | C    | T | 1.8882235676899308e-08 | 5.6219422822216085 | 32182.0 |
| 17 | rs55711631         | 43958431 | T    | C | 1.8884687346446983e-08 | 5.621919858833741  | 32180.0 |
| 17 | rs55886302         | 43936011 | A    | G | 1.8888862529085026e-08 | 5.621881678405983  | 32181.0 |
| 17 | rs56136075         | 43936298 | C    | A | 1.8888862529085026e-08 | 5.621881678405983  | 32181.0 |
| 17 | rs76563578         | 43933879 | C    | G | 1.890517429304776e-08  | 5.6217325921463015 | 32159.0 |
| 17 | 17:43934587_GT_G   | 43934587 | GT   | G | 1.891857883326624e-08  | 5.621610170793235  | 32175.0 |
| 17 | rs62056760         | 43968572 | G    | A | 1.892355813878035e-08  | 5.621564717107423  | 32178.0 |
| 17 | 17:44133818_TA_T   | 44133818 | TA   | T | 1.8937041906624586e-08 | 5.621441688552141  | 32167.0 |
| 17 | rs74457229         | 43972581 | C    | T | 1.8949138811566547e-08 | 5.6213313863698735 | 32186.0 |
| 17 | rs757055           | 43946875 | C    | T | 1.8960711069626185e-08 | 5.6212259319996285 | 32170.0 |
| 17 | 17:44290910_A_G    | 44290910 | A    | G | 1.900000194852798e-08  | 5.620868352211257  | 31936.0 |
| 17 | 17:44293963_T_A    | 44293963 | T    | A | 1.900266862499195e-08  | 5.620844109255179  | 32062.0 |
| 17 | rs62061729         | 44017283 | A    | G | 1.900720281730497e-08  | 5.620802896154489  | 32184.0 |
| 17 | rs62062293         | 44100553 | C    | A | 1.9018476214117096e-08 | 5.620700469066808  | 32182.0 |
| 17 | rs7687             | 44103296 | T    | C | 1.902434898094589e-08  | 5.620647134019864  | 32185.0 |
| 17 | rs17652748         | 44103616 | C    | T | 1.902434898094589e-08  | 5.620647134019864  | 32185.0 |
| 17 | rs2158257          | 44104343 | A    | C | 1.902434898094589e-08  | 5.620647134019864  | 32185.0 |
| 17 | rs17574228         | 44104509 | T    | C | 1.902434898094589e-08  | 5.620647134019864  | 32185.0 |
| 17 | rs17574361         | 44108202 | A    | G | 1.902434898094589e-08  | 5.620647134019864  | 32185.0 |
| 17 | rs17652961         | 44108355 | G    | A | 1.902434898094589e-08  | 5.620647134019864  | 32185.0 |
| 17 | rs17574425         | 44109188 | C    | G | 1.902434898094589e-08  | 5.620647134019864  | 32185.0 |
| 17 | rs55881134         | 44109248 | G    | A | 1.902434898094589e-08  | 5.620647134019864  | 32185.0 |
| 17 | rs1467968          | 43986396 | C    | T | 1.9047256403058693e-08 | 5.620439247035908  | 32172.0 |

|    |                    |          |      |    |                        |                    |         |
|----|--------------------|----------|------|----|------------------------|--------------------|---------|
| 17 | rs4371195          | 43986420 | A    | G  | 1.9047256403058693e-08 | 5.620439247035908  | 32172.0 |
| 17 | rs17585012         | 44227510 | A    | T  | 1.905648042870355e-08  | 5.6203556066936216 | 32113.0 |
| 17 | rs147091683        | 44101775 | A    | AT | 1.9065575058303763e-08 | 5.62027317814784   | 32170.0 |
| 17 | rs78229689         | 44106806 | G    | A  | 1.906805006892691e-08  | 5.620250752668966  | 32183.0 |
| 17 | rs733969           | 44089727 | G    | A  | 1.9071395178441992e-08 | 5.620220447923149  | 32185.0 |
| 17 | rs62063684         | 44132269 | T    | C  | 1.9078957245938833e-08 | 5.620151959008602  | 32184.0 |
| 17 | rs62063685         | 44132379 | A    | G  | 1.9078957245938833e-08 | 5.620151959008602  | 32184.0 |
| 17 | rs62063687         | 44132592 | A    | G  | 1.9078957245938833e-08 | 5.620151959008602  | 32184.0 |
| 17 | rs62060760         | 44132887 | C    | T  | 1.9078957245938833e-08 | 5.620151959008602  | 32184.0 |
| 17 | rs17575437         | 44133031 | T    | A  | 1.9078957245938833e-08 | 5.620151959008602  | 32184.0 |
| 17 | rs17653889         | 44133070 | A    | T  | 1.9078957245938833e-08 | 5.620151959008602  | 32184.0 |
| 17 | rs62060761         | 44133162 | A    | C  | 1.9078957245938833e-08 | 5.620151959008602  | 32184.0 |
| 17 | rs111259120        | 44133534 | C    | T  | 1.9078957245938833e-08 | 5.620151959008602  | 32184.0 |
| 17 | rs62060764         | 44133633 | A    | G  | 1.9078957245938833e-08 | 5.620151959008602  | 32184.0 |
| 17 | rs62060765         | 44133648 | A    | C  | 1.9078957245938833e-08 | 5.620151959008602  | 32184.0 |
| 17 | rs17575507         | 44134095 | A    | G  | 1.9078957245938833e-08 | 5.620151959008602  | 32184.0 |
| 17 | rs876944           | 44134391 | G    | T  | 1.9078957245938833e-08 | 5.620151959008602  | 32184.0 |
| 17 | rs62060767         | 44134910 | G    | A  | 1.9078957245938833e-08 | 5.620151959008602  | 32184.0 |
| 17 | rs62060769         | 44135026 | G    | C  | 1.9078957245938833e-08 | 5.620151959008602  | 32184.0 |
| 17 | rs1107820          | 44135359 | T    | C  | 1.9078957245938833e-08 | 5.620151959008602  | 32184.0 |
| 17 | rs17575556         | 44135827 | G    | A  | 1.9078957245938833e-08 | 5.620151959008602  | 32184.0 |
| 17 | rs17653998         | 44135985 | A    | G  | 1.9078957245938833e-08 | 5.620151959008602  | 32184.0 |
| 17 | rs62060785         | 44136634 | G    | A  | 1.9078957245938833e-08 | 5.620151959008602  | 32184.0 |
| 17 | rs17654016         | 44137925 | T    | C  | 1.9078957245938833e-08 | 5.620151959008602  | 32184.0 |
| 17 | rs2316951          | 44139083 | G    | C  | 1.9078957245938833e-08 | 5.620151959008602  | 32184.0 |
| 17 | rs2316952          | 44139190 | G    | C  | 1.9078957245938833e-08 | 5.620151959008602  | 32184.0 |
| 17 | rs17575683         | 44139662 | C    | T  | 1.9078957245938833e-08 | 5.620151959008602  | 32184.0 |
| 17 | rs112411928        | 44139762 | C    | G  | 1.9078957245938833e-08 | 5.620151959008602  | 32184.0 |
| 17 | rs2316953          | 44140341 | G    | A  | 1.9078957245938833e-08 | 5.620151959008602  | 32184.0 |
| 17 | rs2838             | 44141347 | A    | G  | 1.9078957245938833e-08 | 5.620151959008602  | 32184.0 |
| 17 | rs12150127         | 44141732 | G    | A  | 1.9078957245938833e-08 | 5.620151959008602  | 32184.0 |
| 17 | rs62060792         | 44141955 | T    | A  | 1.9078957245938833e-08 | 5.620151959008602  | 32184.0 |
| 17 | rs76307183         | 44142121 | G    | A  | 1.9078957245938833e-08 | 5.620151959008602  | 32184.0 |
| 17 | rs62060793         | 44142427 | A    | G  | 1.9078957245938833e-08 | 5.620151959008602  | 32184.0 |
| 17 | rs62060795         | 44142663 | C    | T  | 1.9078957245938833e-08 | 5.620151959008602  | 32184.0 |
| 17 | rs17575773         | 44142879 | C    | T  | 1.9078957245938833e-08 | 5.620151959008602  | 32184.0 |
| 17 | rs62060797         | 44143344 | G    | A  | 1.9078957245938833e-08 | 5.620151959008602  | 32184.0 |
| 17 | rs12150344         | 44143484 | G    | A  | 1.9078957245938833e-08 | 5.620151959008602  | 32184.0 |
| 17 | rs62060798         | 44144152 | T    | C  | 1.9078957245938833e-08 | 5.620151959008602  | 32184.0 |
| 17 | rs62060799         | 44144251 | G    | T  | 1.9078957245938833e-08 | 5.620151959008602  | 32184.0 |
| 17 | 17:44092729_TAAA_T | 44092729 | TAAA | T  | 1.9093956231335654e-08 | 5.620016192598079  | 31794.0 |
| 17 | rs12150506         | 44090536 | G    | A  | 1.9108564560327418e-08 | 5.61988406179908   | 32185.0 |
| 17 | rs17572467         | 44054388 | T    | C  | 1.9111514359379523e-08 | 5.6198573930791484 | 32186.0 |
| 17 | rs17572495         | 44054596 | T    | G  | 1.9111514359379523e-08 | 5.6198573930791484 | 32186.0 |
| 17 | rs62063779         | 44054671 | C    | T  | 1.9111514359379523e-08 | 5.6198573930791484 | 32186.0 |
| 17 | rs62063780         | 44056238 | A    | G  | 1.9111514359379523e-08 | 5.6198573930791484 | 32186.0 |
| 17 | rs2163129          | 44056433 | T    | C  | 1.9111514359379523e-08 | 5.6198573930791484 | 32186.0 |
| 17 | rs2163130          | 44056434 | G    | A  | 1.9111514359379523e-08 | 5.6198573930791484 | 32186.0 |
| 17 | rs1981997          | 44056767 | G    | A  | 1.9111514359379523e-08 | 5.6198573930791484 | 32186.0 |
| 17 | rs1981998          | 44056833 | G    | A  | 1.9111514359379523e-08 | 5.6198573930791484 | 32186.0 |
| 17 | rs17572627         | 44058629 | T    | A  | 1.9111514359379523e-08 | 5.6198573930791484 | 32186.0 |
| 17 | rs62063781         | 44058691 | G    | T  | 1.9111514359379523e-08 | 5.6198573930791484 | 32186.0 |
| 17 | rs17651483         | 44058861 | C    | A  | 1.9111514359379523e-08 | 5.6198573930791484 | 32186.0 |
| 17 | rs62063784         | 44059775 | A    | G  | 1.9111514359379523e-08 | 5.6198573930791484 | 32186.0 |



|    |             |          |   |   |                        |                    |         |
|----|-------------|----------|---|---|------------------------|--------------------|---------|
| 17 | rs56234850  | 44060248 | G | A | 1.9111514359379523e-08 | 5.6198573930791484 | 32186.0 |
| 17 | rs63750417  | 44060775 | C | T | 1.9111514359379523e-08 | 5.6198573930791484 | 32186.0 |
| 17 | rs62063787  | 44061036 | T | C | 1.9111514359379523e-08 | 5.6198573930791484 | 32186.0 |
| 17 | rs62063788  | 44061696 | C | T | 1.9111514359379523e-08 | 5.6198573930791484 | 32186.0 |
| 17 | rs56363731  | 44062337 | G | A | 1.9111514359379523e-08 | 5.6198573930791484 | 32186.0 |
| 17 | rs62063790  | 44062915 | G | T | 1.9111514359379523e-08 | 5.6198573930791484 | 32186.0 |
| 17 | rs62063791  | 44062993 | A | G | 1.9111514359379523e-08 | 5.6198573930791484 | 32186.0 |
| 17 | rs1529534   | 44063140 | A | G | 1.9111514359379523e-08 | 5.6198573930791484 | 32186.0 |
| 17 | rs17572795  | 44063393 | G | A | 1.9111514359379523e-08 | 5.6198573930791484 | 32186.0 |
| 17 | rs17572823  | 44063563 | T | C | 1.9111514359379523e-08 | 5.6198573930791484 | 32186.0 |
| 17 | rs17572851  | 44063766 | A | G | 1.9111514359379523e-08 | 5.6198573930791484 | 32186.0 |
| 17 | rs62063792  | 44063787 | A | G | 1.9111514359379523e-08 | 5.6198573930791484 | 32186.0 |
| 17 | rs62063793  | 44064334 | T | C | 1.9111514359379523e-08 | 5.6198573930791484 | 32186.0 |
| 17 | rs1529535   | 44064759 | A | C | 1.9111514359379523e-08 | 5.6198573930791484 | 32186.0 |
| 17 | rs919461    | 44065669 | A | T | 1.9111514359379523e-08 | 5.6198573930791484 | 32186.0 |
| 17 | rs919462    | 44065740 | C | T | 1.9111514359379523e-08 | 5.6198573930791484 | 32186.0 |
| 17 | rs62063794  | 44066088 | T | A | 1.9111514359379523e-08 | 5.6198573930791484 | 32186.0 |
| 17 | rs112385572 | 44066172 | A | G | 1.9111514359379523e-08 | 5.6198573930791484 | 32186.0 |
| 17 | rs17651700  | 44066634 | C | G | 1.9111514359379523e-08 | 5.6198573930791484 | 32186.0 |
| 17 | rs372810927 | 44066868 | C | A | 1.9111514359379523e-08 | 5.6198573930791484 | 32186.0 |
| 17 | rs113134013 | 44066995 | C | T | 1.9111514359379523e-08 | 5.6198573930791484 | 32186.0 |
| 17 | rs76357066  | 44067046 | G | A | 1.9111514359379523e-08 | 5.6198573930791484 | 32186.0 |
| 17 | rs79447161  | 44067508 | A | G | 1.9111514359379523e-08 | 5.6198573930791484 | 32186.0 |
| 17 | rs17651754  | 44067546 | T | C | 1.9111514359379523e-08 | 5.6198573930791484 | 32186.0 |
| 17 | rs10445338  | 44067682 | G | A | 1.9111514359379523e-08 | 5.6198573930791484 | 32186.0 |
| 17 | rs111652694 | 44067831 | T | C | 1.9111514359379523e-08 | 5.6198573930791484 | 32186.0 |
| 17 | rs75743061  | 44068112 | C | G | 1.9111514359379523e-08 | 5.6198573930791484 | 32186.0 |
| 17 | rs62063795  | 44068238 | C | T | 1.9111514359379523e-08 | 5.6198573930791484 | 32186.0 |
| 17 | rs62063796  | 44068289 | G | A | 1.9111514359379523e-08 | 5.6198573930791484 | 32186.0 |
| 17 | rs62063797  | 44068294 | G | C | 1.9111514359379523e-08 | 5.6198573930791484 | 32186.0 |
| 17 | rs77290642  | 44068480 | T | C | 1.9111514359379523e-08 | 5.6198573930791484 | 32186.0 |
| 17 | rs62063798  | 44068543 | G | A | 1.9111514359379523e-08 | 5.6198573930791484 | 32186.0 |
| 17 | rs1052551   | 44068924 | G | A | 1.9111514359379523e-08 | 5.6198573930791484 | 32186.0 |
| 17 | rs62063799  | 44069180 | C | G | 1.9111514359379523e-08 | 5.6198573930791484 | 32186.0 |
| 17 | rs62063800  | 44069198 | C | T | 1.9111514359379523e-08 | 5.6198573930791484 | 32186.0 |
| 17 | rs62063801  | 44069376 | G | T | 1.9111514359379523e-08 | 5.6198573930791484 | 32186.0 |
| 17 | rs17651857  | 44069687 | A | G | 1.9111514359379523e-08 | 5.6198573930791484 | 32186.0 |
| 17 | rs74759276  | 44069768 | A | G | 1.9111514359379523e-08 | 5.6198573930791484 | 32186.0 |
| 17 | rs17651887  | 44069840 | G | A | 1.9111514359379523e-08 | 5.6198573930791484 | 32186.0 |
| 17 | rs78599197  | 44069970 | C | G | 1.9111514359379523e-08 | 5.6198573930791484 | 32186.0 |
| 17 | rs62063842  | 44070111 | G | C | 1.9111514359379523e-08 | 5.6198573930791484 | 32186.0 |
| 17 | rs62064674  | 44088772 | C | A | 1.9111514359379523e-08 | 5.6198573930791484 | 32186.0 |
| 17 | rs76723223  | 44089108 | T | C | 1.9111514359379523e-08 | 5.6198573930791484 | 32186.0 |
| 17 | rs733968    | 44089715 | C | T | 1.9111514359379523e-08 | 5.6198573930791484 | 32186.0 |
| 17 | rs4283261   | 44089921 | C | T | 1.9111514359379523e-08 | 5.6198573930791484 | 32186.0 |
| 17 | rs62062265  | 44090035 | C | G | 1.9111514359379523e-08 | 5.6198573930791484 | 32186.0 |
| 17 | rs75666751  | 44090148 | A | C | 1.9111514359379523e-08 | 5.6198573930791484 | 32186.0 |
| 17 | rs4306559   | 44090236 | T | C | 1.9111514359379523e-08 | 5.6198573930791484 | 32186.0 |
| 17 | rs747152    | 44090339 | T | C | 1.9111514359379523e-08 | 5.6198573930791484 | 32186.0 |
| 17 | rs62062270  | 44091195 | T | C | 1.9111514359379523e-08 | 5.6198573930791484 | 32186.0 |
| 17 | rs75534191  | 44091724 | G | A | 1.9111514359379523e-08 | 5.6198573930791484 | 32186.0 |
| 17 | rs62062272  | 44092108 | T | C | 1.9111514359379523e-08 | 5.6198573930791484 | 32186.0 |
| 17 | rs62062273  | 44092243 | C | T | 1.9111514359379523e-08 | 5.6198573930791484 | 32186.0 |
| 17 | rs62062275  | 44093496 | A | G | 1.9111514359379523e-08 | 5.6198573930791484 | 32186.0 |

|    |             |          |    |     |                        |                    |         |
|----|-------------|----------|----|-----|------------------------|--------------------|---------|
| 17 | rs62062276  | 44093627 | A  | G   | 1.9111514359379523e-08 | 5.6198573930791484 | 32186.0 |
| 17 | rs62062278  | 44093860 | A  | G   | 1.9111514359379523e-08 | 5.6198573930791484 | 32186.0 |
| 17 | rs62062281  | 44094112 | A  | G   | 1.9111514359379523e-08 | 5.6198573930791484 | 32186.0 |
| 17 | rs62062282  | 44094374 | A  | G   | 1.9111514359379523e-08 | 5.6198573930791484 | 32186.0 |
| 17 | rs17652502  | 44094471 | G  | A   | 1.9111514359379523e-08 | 5.6198573930791484 | 32186.0 |
| 17 | rs2316948   | 44094667 | C  | G   | 1.9111514359379523e-08 | 5.6198573930791484 | 32186.0 |
| 17 | rs62062283  | 44095055 | C  | A   | 1.9111514359379523e-08 | 5.6198573930791484 | 32186.0 |
| 17 | rs111976319 | 44095335 | C  | A   | 1.9111514359379523e-08 | 5.6198573930791484 | 32186.0 |
| 17 | rs62062284  | 44095570 | G  | A   | 1.9111514359379523e-08 | 5.6198573930791484 | 32186.0 |
| 17 | rs62062285  | 44095661 | T  | G   | 1.9111514359379523e-08 | 5.6198573930791484 | 32186.0 |
| 17 | rs55726761  | 44099669 | G  | A   | 1.9111514359379523e-08 | 5.6198573930791484 | 32186.0 |
| 17 | rs62062292  | 44099809 | A  | C   | 1.9111514359379523e-08 | 5.6198573930791484 | 32186.0 |
| 17 | rs77747656  | 44099827 | C  | G   | 1.9111514359379523e-08 | 5.6198573930791484 | 32186.0 |
| 17 | rs62062294  | 44100666 | A  | C   | 1.9111514359379523e-08 | 5.6198573930791484 | 32186.0 |
| 17 | rs62062295  | 44100906 | A  | G   | 1.9111514359379523e-08 | 5.6198573930791484 | 32186.0 |
| 17 | rs62062296  | 44100916 | C  | T   | 1.9111514359379523e-08 | 5.6198573930791484 | 32186.0 |
| 17 | rs62062297  | 44101004 | A  | G   | 1.9111514359379523e-08 | 5.6198573930791484 | 32186.0 |
| 17 | rs7350928   | 44108100 | C  | T   | 1.9111514359379523e-08 | 5.6198573930791484 | 32186.0 |
| 17 | rs36076725  | 44110532 | G  | A   | 1.9111514359379523e-08 | 5.6198573930791484 | 32186.0 |
| 17 | rs35833914  | 44110541 | G  | A   | 1.9111514359379523e-08 | 5.6198573930791484 | 32186.0 |
| 17 | rs77009866  | 44110888 | A  | T   | 1.9111514359379523e-08 | 5.6198573930791484 | 32186.0 |
| 17 | rs62062321  | 44111109 | A  | G   | 1.9111514359379523e-08 | 5.6198573930791484 | 32186.0 |
| 17 | rs17574604  | 44111613 | A  | G   | 1.9111514359379523e-08 | 5.6198573930791484 | 32186.0 |
| 17 | rs17653162  | 44111827 | C  | A   | 1.9111514359379523e-08 | 5.6198573930791484 | 32186.0 |
| 17 | rs62062322  | 44112385 | A  | G   | 1.9111514359379523e-08 | 5.6198573930791484 | 32186.0 |
| 17 | rs17653193  | 44112441 | G  | A   | 1.9111514359379523e-08 | 5.6198573930791484 | 32186.0 |
| 17 | rs17653211  | 44112638 | T  | C   | 1.9111514359379523e-08 | 5.6198573930791484 | 32186.0 |
| 17 | rs17653255  | 44112743 | C  | A   | 1.9111514359379523e-08 | 5.6198573930791484 | 32186.0 |
| 17 | rs4608377   | 44113359 | T  | C   | 1.9111514359379523e-08 | 5.6198573930791484 | 32186.0 |
| 17 | rs12185225  | 44113491 | T  | C   | 1.9111514359379523e-08 | 5.6198573930791484 | 32186.0 |
| 17 | rs12150438  | 44113963 | C  | T   | 1.9111514359379523e-08 | 5.6198573930791484 | 32186.0 |
| 17 | rs12150162  | 44114218 | T  | C   | 1.9111514359379523e-08 | 5.6198573930791484 | 32186.0 |
| 17 | rs62062134  | 44114432 | A  | C   | 1.9111514359379523e-08 | 5.6198573930791484 | 32186.0 |
| 17 | rs17574796  | 44115074 | T  | C   | 1.9111514359379523e-08 | 5.6198573930791484 | 32186.0 |
| 17 | rs17574824  | 44115107 | C  | T   | 1.9111514359379523e-08 | 5.6198573930791484 | 32186.0 |
| 17 | rs12185243  | 44115351 | T  | C   | 1.9111514359379523e-08 | 5.6198573930791484 | 32186.0 |
| 17 | rs11079729  | 44115569 | C  | A   | 1.9111514359379523e-08 | 5.6198573930791484 | 32186.0 |
| 17 | rs12150542  | 44115730 | G  | A   | 1.9111514359379523e-08 | 5.6198573930791484 | 32186.0 |
| 17 | rs12150090  | 44115886 | C  | T   | 1.9111514359379523e-08 | 5.6198573930791484 | 32186.0 |
| 17 | rs41437445  | 44116238 | G  | A   | 1.9111514359379523e-08 | 5.6198573930791484 | 32186.0 |
| 17 | rs62062136  | 44116312 | T  | C   | 1.9111514359379523e-08 | 5.6198573930791484 | 32186.0 |
| 17 | rs10514897  | 44117397 | A  | G   | 1.9111514359379523e-08 | 5.6198573930791484 | 32186.0 |
| 17 | rs75546272  | 44130668 | T  | A   | 1.9111514359379523e-08 | 5.6198573930791484 | 32186.0 |
| 17 | rs62063686  | 44132458 | G  | A   | 1.9111514359379523e-08 | 5.6198573930791484 | 32186.0 |
| 17 | rs111990897 | 44138377 | GA | GAA | 1.9111514359379523e-08 | 5.6198573930791484 | 32186.0 |
| 17 | rs111990897 | 44138377 | G  | GA  | 1.9111514359379523e-08 | 5.6198573930791484 | 32186.0 |
| 17 | rs150514510 | 44142231 | T  | TA  | 1.9111514359379523e-08 | 5.6198573930791484 | 32186.0 |
| 17 | rs146149698 | 44142491 | C  | CCA | 1.9111514359379523e-08 | 5.6198573930791484 | 32186.0 |
| 17 | rs55831516  | 44148267 | C  | T   | 1.9111514359379523e-08 | 5.6198573930791484 | 32186.0 |
| 17 | rs62060809  | 44148613 | G  | A   | 1.9111514359379523e-08 | 5.6198573930791484 | 32186.0 |
| 17 | rs62060810  | 44148674 | A  | G   | 1.9111514359379523e-08 | 5.6198573930791484 | 32186.0 |
| 17 | rs1117253   | 44149297 | A  | C   | 1.9111514359379523e-08 | 5.6198573930791484 | 32186.0 |
| 17 | rs12150625  | 44149448 | C  | G   | 1.9111514359379523e-08 | 5.6198573930791484 | 32186.0 |
| 17 | rs12150627  | 44149537 | C  | G   | 1.9111514359379523e-08 | 5.6198573930791484 | 32186.0 |

|    |             |          |   |                                      |                        |                    |         |
|----|-------------|----------|---|--------------------------------------|------------------------|--------------------|---------|
| 17 | rs12150628  | 44149581 | C | T                                    | 1.9111514359379523e-08 | 5.6198573930791484 | 32186.0 |
| 17 | rs12150611  | 44149741 | G | A                                    | 1.9111514359379523e-08 | 5.6198573930791484 | 32186.0 |
| 17 | rs74850776  | 44150042 | T | C                                    | 1.9111514359379523e-08 | 5.6198573930791484 | 32186.0 |
| 17 | rs974295    | 44150152 | A | T                                    | 1.9111514359379523e-08 | 5.6198573930791484 | 32186.0 |
| 17 | rs974293    | 44150233 | G | A                                    | 1.9111514359379523e-08 | 5.6198573930791484 | 32186.0 |
| 17 | rs974292    | 44150464 | T | C                                    | 1.9111514359379523e-08 | 5.6198573930791484 | 32186.0 |
| 17 | rs974291    | 44150480 | A | T                                    | 1.9111514359379523e-08 | 5.6198573930791484 | 32186.0 |
| 17 | rs12150551  | 44150920 | T | C                                    | 1.9111514359379523e-08 | 5.6198573930791484 | 32186.0 |
| 17 | rs12150558  | 44151156 | T | C                                    | 1.9111514359379523e-08 | 5.6198573930791484 | 32186.0 |
| 17 | rs62060812  | 44151667 | A | G                                    | 1.9111514359379523e-08 | 5.6198573930791484 | 32186.0 |
| 17 | rs62060834  | 44151697 | A | T                                    | 1.9111514359379523e-08 | 5.6198573930791484 | 32186.0 |
| 17 | rs113989747 | 44151969 | C | CA                                   | 1.9111514359379523e-08 | 5.6198573930791484 | 32186.0 |
| 17 | rs62060835  | 44152390 | C | T                                    | 1.9111514359379523e-08 | 5.6198573930791484 | 32186.0 |
| 17 | rs62060836  | 44152447 | G | A                                    | 1.9111514359379523e-08 | 5.6198573930791484 | 32186.0 |
| 17 | rs112597362 | 44152736 | G | GCT                                  | 1.9111514359379523e-08 | 5.6198573930791484 | 32186.0 |
| 17 | rs62060837  | 44152760 | T | G                                    | 1.9111514359379523e-08 | 5.6198573930791484 | 32186.0 |
| 17 | rs368572568 | 44152812 | T | CCCA<br>AGTG<br>AGGC<br>ACCT<br>GGGT | 1.9111514359379523e-08 | 5.6198573930791484 | 32186.0 |
| 17 | rs62060838  | 44153144 | A | G                                    | 1.9111514359379523e-08 | 5.6198573930791484 | 32186.0 |
| 17 | rs62060839  | 44153227 | A | G                                    | 1.9111514359379523e-08 | 5.6198573930791484 | 32186.0 |
| 17 | rs62060841  | 44153386 | A | T                                    | 1.9111514359379523e-08 | 5.6198573930791484 | 32186.0 |
| 17 | rs62060842  | 44153607 | T | A                                    | 1.9111514359379523e-08 | 5.6198573930791484 | 32186.0 |
| 17 | rs62060843  | 44153626 | C | T                                    | 1.9111514359379523e-08 | 5.6198573930791484 | 32186.0 |
| 17 | rs76154201  | 44154033 | T | C                                    | 1.9111514359379523e-08 | 5.6198573930791484 | 32186.0 |
| 17 | rs75530705  | 44154048 | C | T                                    | 1.9111514359379523e-08 | 5.6198573930791484 | 32186.0 |
| 17 | rs112197756 | 44154105 | A | G                                    | 1.9111514359379523e-08 | 5.6198573930791484 | 32186.0 |
| 17 | rs62060845  | 44154393 | A | G                                    | 1.9111514359379523e-08 | 5.6198573930791484 | 32186.0 |
| 17 | rs62060846  | 44154461 | A | C                                    | 1.9111514359379523e-08 | 5.6198573930791484 | 32186.0 |
| 17 | rs74481389  | 44154607 | T | C                                    | 1.9111514359379523e-08 | 5.6198573930791484 | 32186.0 |
| 17 | rs62060847  | 44154946 | C | T                                    | 1.9111514359379523e-08 | 5.6198573930791484 | 32186.0 |
| 17 | rs56100031  | 44155157 | C | T                                    | 1.9111514359379523e-08 | 5.6198573930791484 | 32186.0 |
| 17 | rs55972730  | 44155707 | C | T                                    | 1.9111514359379523e-08 | 5.6198573930791484 | 32186.0 |
| 17 | rs2316954   | 44156167 | G | A                                    | 1.9111514359379523e-08 | 5.6198573930791484 | 32186.0 |
| 17 | rs56167560  | 43792411 | A | G                                    | 1.9118823739493804e-08 | 5.619791327215463  | 32057.0 |
| 17 | rs55849973  | 43792418 | T | C                                    | 1.9118823739493804e-08 | 5.619791327215463  | 32057.0 |
| 17 | rs113912415 | 44007785 | A | G                                    | 1.912036643596991e-08  | 5.619777386680962  | 32172.0 |
| 17 | rs62054841  | 43937104 | G | A                                    | 1.91266726383752e-08   | 5.6197204122097055 | 32182.0 |
| 17 | rs62054842  | 43937162 | C | T                                    | 1.91266726383752e-08   | 5.6197204122097055 | 32182.0 |
| 17 | rs62054843  | 43937184 | T | C                                    | 1.91266726383752e-08   | 5.6197204122097055 | 32182.0 |
| 17 | rs62054844  | 43937333 | T | G                                    | 1.91266726383752e-08   | 5.6197204122097055 | 32182.0 |
| 17 | rs55888391  | 43938107 | A | G                                    | 1.91266726383752e-08   | 5.6197204122097055 | 32182.0 |
| 17 | rs76329216  | 43938499 | G | A                                    | 1.91266726383752e-08   | 5.6197204122097055 | 32182.0 |
| 17 | rs62054846  | 43938634 | A | G                                    | 1.91266726383752e-08   | 5.6197204122097055 | 32182.0 |
| 17 | rs55646970  | 43938796 | A | G                                    | 1.91266726383752e-08   | 5.6197204122097055 | 32182.0 |
| 17 | rs55673092  | 43938882 | G | A                                    | 1.91266726383752e-08   | 5.6197204122097055 | 32182.0 |
| 17 | rs62056835  | 43988623 | G | A                                    | 1.913861975881557e-08  | 5.619612523884325  | 32179.0 |
| 17 | rs2106784   | 43949892 | C | T                                    | 1.9141842706753038e-08 | 5.619583430292     | 32181.0 |
| 17 | rs112454267 | 44005329 | G | A                                    | 1.9156755765267813e-08 | 5.619448871812402  | 32179.0 |
| 17 | rs62056856  | 43992939 | T | C                                    | 1.915944401391537e-08  | 5.619424626933757  | 32182.0 |
| 17 | rs739642    | 43946838 | C | A                                    | 1.9175514009628392e-08 | 5.619279763099554  | 32182.0 |
| 17 | rs56398500  | 43947488 | A | G                                    | 1.9175514009628392e-08 | 5.619279763099554  | 32182.0 |
| 17 | rs62055483  | 43948040 | C | T                                    | 1.9175514009628392e-08 | 5.619279763099554  | 32182.0 |
| 17 | rs78238042  | 43948159 | G | A                                    | 1.9175514009628392e-08 | 5.619279763099554  | 32182.0 |

|    |                 |          |   |     |                        |                    |         |
|----|-----------------|----------|---|-----|------------------------|--------------------|---------|
| 17 | rs56327054      | 43943957 | G | C   | 1.9177868465523206e-08 | 5.6192585486321125 | 32175.0 |
| 17 | rs733966        | 44089563 | C | T   | 1.919004889041742e-08  | 5.6191488391278455 | 32184.0 |
| 17 | rs733967        | 44089690 | T | C   | 1.919624295318227e-08  | 5.619093074923172  | 32185.0 |
| 17 | rs113796169     | 44005254 | T | A   | 1.9197320381597044e-08 | 5.619083376782888  | 32180.0 |
| 17 | rs753235        | 43946223 | G | A   | 1.9202506335282376e-08 | 5.6190367044092735 | 32133.0 |
| 17 | rs111739681     | 43898459 | C | T   | 1.9206211428960207e-08 | 5.6190033669250425 | 32173.0 |
| 17 | rs35168513      | 44275172 | A | ACT | 1.9207761039635642e-08 | 5.618989425776863  | 31737.0 |
| 17 | rs62063671      | 44124837 | A | G   | 1.924822900987232e-08  | 5.618625739814208  | 32177.0 |
| 17 | 17:44296522_T_C | 44296522 | T | C   | 1.9255522118162867e-08 | 5.618560275556184  | 32071.0 |
| 17 | rs10445371      | 44065410 | G | A   | 1.9264236882173603e-08 | 5.618482081823107  | 32185.0 |
| 17 | rs919464        | 44065901 | C | T   | 1.9264236882173603e-08 | 5.618482081823107  | 32185.0 |
| 17 | rs62060858      | 44164090 | G | C   | 1.9283436506755184e-08 | 5.618309933175943  | 32183.0 |
| 17 | rs62060859      | 44164133 | G | A   | 1.9283436506755184e-08 | 5.618309933175943  | 32183.0 |
| 17 | rs55692232      | 44164323 | G | A   | 1.9283436506755184e-08 | 5.618309933175943  | 32183.0 |
| 17 | rs3912061       | 44165098 | C | T   | 1.9283436506755184e-08 | 5.618309933175943  | 32183.0 |
| 17 | rs74348235      | 44165852 | A | G   | 1.9283436506755184e-08 | 5.618309933175943  | 32183.0 |
| 17 | rs17660167      | 44166311 | C | T   | 1.9283436506755184e-08 | 5.618309933175943  | 32183.0 |
| 17 | rs17660294      | 44167101 | T | C   | 1.9283436506755184e-08 | 5.618309933175943  | 32183.0 |
| 17 | rs62061766      | 44167464 | G | A   | 1.9283436506755184e-08 | 5.618309933175943  | 32183.0 |
| 17 | rs79923630      | 44167661 | G | T   | 1.9283436506755184e-08 | 5.618309933175943  | 32183.0 |
| 17 | rs62061767      | 44167729 | A | G   | 1.9283436506755184e-08 | 5.618309933175943  | 32183.0 |
| 17 | rs111364350     | 44168508 | C | T   | 1.9283436506755184e-08 | 5.618309933175943  | 32183.0 |
| 17 | rs62061770      | 44169377 | G | C   | 1.9283436506755184e-08 | 5.618309933175943  | 32183.0 |
| 17 | rs111970616     | 44169581 | T | C   | 1.9283436506755184e-08 | 5.618309933175943  | 32183.0 |
| 17 | rs17660337      | 44169605 | T | C   | 1.9283436506755184e-08 | 5.618309933175943  | 32183.0 |
| 17 | rs62061788      | 44169759 | G | A   | 1.9283436506755184e-08 | 5.618309933175943  | 32183.0 |
| 17 | rs62061789      | 44169769 | C | T   | 1.9283436506755184e-08 | 5.618309933175943  | 32183.0 |
| 17 | rs17660398      | 44170612 | C | T   | 1.9283436506755184e-08 | 5.618309933175943  | 32183.0 |
| 17 | rs62061792      | 44171554 | G | A   | 1.929581803535456e-08  | 5.618199005529698  | 32030.0 |
| 17 | rs56289364      | 43947928 | A | G   | 1.9303331940816704e-08 | 5.618131721212616  | 32181.0 |
| 17 | rs55673340      | 43948733 | C | T   | 1.9303331940816704e-08 | 5.618131721212616  | 32181.0 |
| 17 | rs77092481      | 43949008 | C | T   | 1.9303331940816704e-08 | 5.618131721212616  | 32181.0 |
| 17 | rs17577975      | 44210442 | C | T   | 1.9307597866133944e-08 | 5.618093532703923  | 32077.0 |
| 17 | rs17573607      | 44083081 | G | A   | 1.931125510932152e-08  | 5.6180607996316265 | 32164.0 |
| 17 | rs78136862      | 44085743 | T | C   | 1.9312542078659842e-08 | 5.618049282425286  | 32184.0 |
| 17 | rs62064670      | 44085852 | T | A   | 1.9312542078659842e-08 | 5.618049282425286  | 32184.0 |
| 17 | rs62064671      | 44086100 | T | C   | 1.9312542078659842e-08 | 5.618049282425286  | 32184.0 |
| 17 | rs3912060       | 44165435 | C | T   | 1.9319655794434408e-08 | 5.6179856345724035 | 32178.0 |
| 17 | rs17660132      | 44165803 | T | C   | 1.9319655794434408e-08 | 5.6179856345724035 | 32178.0 |
| 17 | rs62061764      | 44166197 | A | G   | 1.9319655794434408e-08 | 5.6179856345724035 | 32178.0 |
| 17 | rs12149995      | 44092801 | G | A   | 1.9326433150640832e-08 | 5.6179250173592505 | 32182.0 |
| 17 | rs112746008     | 44126650 | C | T   | 1.9334975938915028e-08 | 5.617848639378409  | 32184.0 |
| 17 | rs74977736      | 44126977 | G | C   | 1.9334975938915028e-08 | 5.617848639378409  | 32184.0 |
| 17 | rs12150447      | 44128125 | A | C   | 1.9334975938915028e-08 | 5.617848639378409  | 32184.0 |
| 17 | rs12150064      | 44128407 | C | A   | 1.9334975938915028e-08 | 5.617848639378409  | 32184.0 |
| 17 | rs17653836      | 44128876 | T | A   | 1.9334975938915028e-08 | 5.617848639378409  | 32184.0 |
| 17 | rs17575423      | 44129253 | T | C   | 1.9334975938915028e-08 | 5.617848639378409  | 32184.0 |
| 17 | rs62063676      | 44129800 | G | A   | 1.9334975938915028e-08 | 5.617848639378409  | 32184.0 |
| 17 | rs62063677      | 44129885 | C | T   | 1.9334975938915028e-08 | 5.617848639378409  | 32184.0 |
| 17 | rs62063678      | 44129949 | C | G   | 1.9334975938915028e-08 | 5.617848639378409  | 32184.0 |
| 17 | rs79649865      | 44130587 | T | G   | 1.9334975938915028e-08 | 5.617848639378409  | 32184.0 |
| 17 | rs111853996     | 44130878 | A | G   | 1.9334975938915028e-08 | 5.617848639378409  | 32184.0 |
| 17 | rs112674766     | 44130924 | A | T   | 1.9334975938915028e-08 | 5.617848639378409  | 32184.0 |
| 17 | rs112074397     | 44131022 | T | C   | 1.9334975938915028e-08 | 5.617848639378409  | 32184.0 |

|    |                                |          |                 |              |                        |                    |         |
|----|--------------------------------|----------|-----------------|--------------|------------------------|--------------------|---------|
| 17 | rs78104015                     | 44052733 | A               | G            | 1.9340401853207505e-08 | 5.617800145253169  | 32176.0 |
| 17 | rs74829364                     | 44084533 | T               | C            | 1.934691492127344e-08  | 5.617741952129459  | 32183.0 |
| 17 | rs62064669                     | 44084676 | C               | T            | 1.934691492127344e-08  | 5.617741952129459  | 32183.0 |
| 17 | rs62063669                     | 44122626 | C               | A            | 1.935166538924977e-08  | 5.617699519524156  | 32185.0 |
| 17 | rs77105679                     | 44122896 | G               | A            | 1.935166538924977e-08  | 5.617699519524156  | 32185.0 |
| 17 | 17:43954982_TTCTCTTCCTC<br>A T | 43954982 | TTCTCTTC<br>TCA | T            | 1.937781341552966e-08  | 5.617466138396959  | 31883.0 |
| 17 | rs112116311                    | 43989898 | T               | G            | 1.9393246795865605e-08 | 5.617328533033664  | 32177.0 |
| 17 | rs78209533                     | 43989909 | A               | G            | 1.9393246795865605e-08 | 5.617328533033664  | 32177.0 |
| 17 | rs55760800                     | 43996908 | T               | G            | 1.9393246795865605e-08 | 5.617328533033664  | 32177.0 |
| 17 | rs56303672                     | 43996960 | A               | G            | 1.9393246795865605e-08 | 5.617328533033664  | 32177.0 |
| 17 | rs17564020                     | 43991781 | G               | T            | 1.9406173869043003e-08 | 5.617213355925144  | 32181.0 |
| 17 | rs17572613                     | 44058004 | A               | G            | 1.9420471517372392e-08 | 5.6170860540482375 | 32185.0 |
| 17 | rs75690239                     | 43941710 | C               | T            | 1.9424558456633766e-08 | 5.61704968191712   | 32180.0 |
| 17 | rs62062786                     | 44024660 | G               | C            | 1.9425239695167358e-08 | 5.617043619888079  | 32181.0 |
| 17 | rs62062787                     | 44024865 | T               | C            | 1.9425239695167358e-08 | 5.617043619888079  | 32181.0 |
| 17 | rs62062788                     | 44024906 | A               | G            | 1.9425239695167358e-08 | 5.617043619888079  | 32181.0 |
| 17 | rs113762994                    | 43847095 | C               | TGT          | 1.943927842230604e-08  | 5.616918741633143  | 32143.0 |
| 17 | rs370644144                    | 43933956 | G               | TTGT<br>TTGT | 1.9455442080906158e-08 | 5.61677506994172   | 32157.0 |
| 17 | rs754513                       | 44055638 | T               | A            | 1.9460150432686044e-08 | 5.616733241257862  | 32170.0 |
| 17 | rs56101773                     | 43957269 | T               | C            | 1.946813671332537e-08  | 5.616662314135753  | 32182.0 |
| 17 | rs111447859                    | 43987184 | T               | C            | 1.9488424016150845e-08 | 5.616482267102056  | 32168.0 |
| 17 | rs10445335                     | 43934896 | T               | A            | 1.951386362079759e-08  | 5.6162567510909644 | 32169.0 |
| 17 | rs79252344                     | 44120608 | A               | G            | 1.954070618216852e-08  | 5.616019107488698  | 32184.0 |
| 17 | rs62056838                     | 43989087 | A               | G            | 1.9561136227795475e-08 | 5.615838447741403  | 32180.0 |
| 17 | rs62056839                     | 43989221 | T               | C            | 1.9561136227795475e-08 | 5.615838447741403  | 32180.0 |
| 17 | rs17564780                     | 44005413 | A               | G            | 1.9583235189436923e-08 | 5.61564323616627   | 32180.0 |
| 17 | rs62059008                     | 44006085 | A               | G            | 1.9583235189436923e-08 | 5.61564323616627   | 32180.0 |
| 17 | rs62059009                     | 44006130 | T               | C            | 1.9583235189436923e-08 | 5.61564323616627   | 32180.0 |
| 17 | rs62061705                     | 44006252 | T               | C            | 1.9583235189436923e-08 | 5.61564323616627   | 32180.0 |
| 17 | rs62063783                     | 44059215 | C               | T            | 1.9583784543512533e-08 | 5.615638386162144  | 32182.0 |
| 17 | rs17564829                     | 44006601 | T               | C            | 1.962379061674828e-08  | 5.615285544836743  | 32181.0 |
| 17 | rs62061709                     | 44007493 | C               | T            | 1.962379061674828e-08  | 5.615285544836743  | 32181.0 |
| 17 | rs17572248                     | 44049867 | A               | G            | 1.965608748663744e-08  | 5.615001205443412  | 32184.0 |
| 17 | rs62064672                     | 44086521 | G               | A            | 1.9656914529265967e-08 | 5.6149939301757925 | 32185.0 |
| 17 | rs17572893                     | 44064208 | G               | A            | 1.965836193597276e-08  | 5.614981198450344  | 32182.0 |
| 17 | rs62065457                     | 43574611 | G               | A            | 1.966442839593437e-08  | 5.614927846359504  | 32021.0 |
| 17 | rs393208                       | 43704310 | T               | G            | 1.967587694323588e-08  | 5.614827204482522  | 32146.0 |
| 17 | rs62060840                     | 44153258 | A               | G            | 1.9677118744681155e-08 | 5.6148162914739    | 32179.0 |
| 17 | rs9901937                      | 44063723 | A               | C            | 1.96887125980155e-08   | 5.614714436405967  | 32182.0 |
| 17 | rs41374248                     | 44120442 | A               | G            | 1.969478824181389e-08  | 5.614661083520031  | 32185.0 |
| 17 | rs41399444                     | 44121469 | C               | T            | 1.969478824181389e-08  | 5.614661083520031  | 32185.0 |
| 17 | rs62063668                     | 44122484 | C               | T            | 1.969478824181389e-08  | 5.614661083520031  | 32185.0 |
| 17 | rs62641967                     | 44047216 | T               | G            | 1.970017500843308e-08  | 5.6146137933291    | 32177.0 |
| 17 | rs62060786                     | 44136763 | C               | T            | 1.971731176470958e-08  | 5.614463433943207  | 32180.0 |
| 17 | rs62060787                     | 44136803 | G               | T            | 1.971731176470958e-08  | 5.614463433943207  | 32180.0 |
| 17 | rs55714296                     | 44137189 | A               | T            | 1.971731176470958e-08  | 5.614463433943207  | 32180.0 |
| 17 | rs113093579                    | 43934116 | T               | G            | 1.9725470675126963e-08 | 5.6143918915339    | 32154.0 |
| 17 | rs739643                       | 43946707 | T               | C            | 1.9738061248380567e-08 | 5.614281545901298  | 32181.0 |
| 17 | rs62062785                     | 44024562 | G               | T            | 1.973861486093812e-08  | 5.614276695528217  | 32184.0 |
| 17 | rs111306685                    | 44025407 | C               | CT           | 1.973861486093812e-08  | 5.614276695528217  | 32184.0 |
| 17 | rs111582708                    | 44082955 | A               | AT           | 1.9748582490996094e-08 | 5.614189388587956  | 32166.0 |
| 17 | rs112902492                    | 43958213 | A               | AAT          | 1.9752598625061206e-08 | 5.614154223172274  | 32179.0 |
| 17 | rs75945623                     | 43937505 | C               | T            | 1.979682899040038e-08  | 5.613767399040232  | 32176.0 |
| 17 | rs1467962                      | 43978604 | A               | G            | 1.981113099816641e-08  | 5.613642497927036  | 32185.0 |

|    |                    |          |      |   |                        |                    |         |
|----|--------------------|----------|------|---|------------------------|--------------------|---------|
| 17 | rs1560311          | 43978625 | T    | C | 1.981113099816641e-08  | 5.613642497927036  | 32185.0 |
| 17 | rs62063276         | 44036408 | T    | G | 1.985235792437288e-08  | 5.613282947624162  | 32112.0 |
| 17 | rs12150469         | 44092497 | T    | C | 1.9857856559198564e-08 | 5.613235047460249  | 32184.0 |
| 17 | rs17572169         | 44045974 | C    | T | 1.9864679725845048e-08 | 5.613175626825616  | 32179.0 |
| 17 | rs62063296         | 44046202 | C    | T | 1.9864679725845048e-08 | 5.613175626825616  | 32179.0 |
| 17 | rs74373419         | 44047609 | C    | T | 1.9864679725845048e-08 | 5.613175626825616  | 32179.0 |
| 17 | rs62063297         | 44047802 | A    | T | 1.9864679725845048e-08 | 5.613175626825616  | 32179.0 |
| 17 | rs62062801         | 44028011 | T    | G | 1.987443109472128e-08  | 5.613090739862548  | 32167.0 |
| 17 | rs75242405         | 44049329 | C    | T | 1.988850919945701e-08  | 5.612968259392109  | 32182.0 |
| 17 | rs76640332         | 44189858 | G    | A | 1.9891995388303748e-08 | 5.6129379423145895 | 31996.0 |
| 17 | rs62062799         | 44027521 | G    | T | 1.9901480853701113e-08 | 5.6128554796039545 | 32169.0 |
| 17 | rs111962225        | 43934016 | G    | C | 1.991013323158656e-08  | 5.612780292683762  | 32154.0 |
| 17 | rs112206871        | 44041817 | A    | G | 1.9910691576158745e-08 | 5.612775441903873  | 32170.0 |
| 17 | 17:44104576_CCTT_C | 44104576 | CCTT | C | 1.991250630205309e-08  | 5.612759676860153  | 32049.0 |
| 17 | rs62063853         | 44074613 | A    | G | 1.9914740033488536e-08 | 5.612740273710363  | 32043.0 |
| 17 | rs55930267         | 43792091 | C    | T | 1.9920884061901257e-08 | 5.612686914939994  | 31593.0 |
| 17 | 17:44294983_C_A    | 44294983 | C    | A | 1.993233925669153e-08  | 5.6125874731707865 | 32087.0 |
| 17 | rs430789           | 44295157 | A    | G | 1.993233925669153e-08  | 5.6125874731707865 | 32087.0 |
| 17 | rs55893711         | 44119320 | C    | T | 1.993331743834289e-08  | 5.612578984213675  | 32184.0 |
| 17 | rs10514898         | 44119636 | A    | C | 1.993331743834289e-08  | 5.612578984213675  | 32184.0 |
| 17 | rs62063670         | 44123248 | T    | C | 1.993331743834289e-08  | 5.612578984213675  | 32184.0 |
| 17 | rs74571696         | 44123685 | G    | A | 1.993331743834289e-08  | 5.612578984213675  | 32184.0 |
| 17 | rs79698033         | 44123717 | C    | T | 1.993331743834289e-08  | 5.612578984213675  | 32184.0 |
| 17 | rs62055469         | 43943655 | A    | C | 1.993492455324273e-08  | 5.612565038061111  | 32172.0 |
| 17 | rs62055470         | 43943657 | A    | G | 1.993492455324273e-08  | 5.612565038061111  | 32172.0 |
| 17 | rs62055471         | 43943755 | T    | C | 1.993492455324273e-08  | 5.612565038061111  | 32172.0 |
| 17 | rs78962882         | 44084844 | G    | C | 1.9998542366428748e-08 | 5.612013853157038  | 32180.0 |
| 17 | rs56249080         | 43939432 | G    | T | 2.002561736780426e-08  | 5.611779791507313  | 32181.0 |
| 17 | rs62054857         | 43939936 | G    | A | 2.002561736780426e-08  | 5.611779791507313  | 32181.0 |
| 17 | rs62054858         | 43940188 | T    | C | 2.002561736780426e-08  | 5.611779791507313  | 32181.0 |
| 17 | rs62054859         | 43940685 | G    | A | 2.002561736780426e-08  | 5.611779791507313  | 32181.0 |
| 17 | rs62055460         | 43940825 | G    | C | 2.002561736780426e-08  | 5.611779791507313  | 32181.0 |
| 17 | rs62055461         | 43941350 | C    | T | 2.002561736780426e-08  | 5.611779791507313  | 32181.0 |
| 17 | rs62055462         | 43941476 | A    | C | 2.002561736780426e-08  | 5.611779791507313  | 32181.0 |
| 17 | rs62055463         | 43941491 | A    | G | 2.002561736780426e-08  | 5.611779791507313  | 32181.0 |
| 17 | rs77652965         | 43941608 | C    | G | 2.002561736780426e-08  | 5.611779791507313  | 32181.0 |
| 17 | rs62055464         | 43941858 | T    | G | 2.002561736780426e-08  | 5.611779791507313  | 32181.0 |
| 17 | rs62055465         | 43942046 | T    | A | 2.002561736780426e-08  | 5.611779791507313  | 32181.0 |
| 17 | rs62055466         | 43942656 | G    | A | 2.002561736780426e-08  | 5.611779791507313  | 32181.0 |
| 17 | rs62055467         | 43942820 | T    | C | 2.002561736780426e-08  | 5.611779791507313  | 32181.0 |
| 17 | rs56036719         | 43943974 | C    | T | 2.002561736780426e-08  | 5.611779791507313  | 32181.0 |
| 17 | rs55781174         | 43944158 | C    | T | 2.002561736780426e-08  | 5.611779791507313  | 32181.0 |
| 17 | rs12150223         | 43944204 | T    | C | 2.002561736780426e-08  | 5.611779791507313  | 32181.0 |
| 17 | rs62055476         | 43945495 | A    | G | 2.002561736780426e-08  | 5.611779791507313  | 32181.0 |
| 17 | rs1078830          | 43946112 | T    | C | 2.002561736780426e-08  | 5.611779791507313  | 32181.0 |
| 17 | rs2950705          | 44343121 | A    | G | 2.002645965348912e-08  | 5.611772514930292  | 31534.0 |
| 17 | rs80020809         | 44172391 | C    | T | 2.0027652951007043e-08 | 5.611762206441108  | 32108.0 |
| 17 | rs76090253         | 44002969 | A    | C | 2.0051533547878417e-08 | 5.611556035410863  | 32182.0 |
| 17 | rs55788597         | 44003397 | T    | A | 2.0051533547878417e-08 | 5.611556035410863  | 32182.0 |
| 17 | rs56197117         | 44003446 | A    | G | 2.0051533547878417e-08 | 5.611556035410863  | 32182.0 |
| 17 | rs56249311         | 44003599 | C    | T | 2.0051533547878417e-08 | 5.611556035410863  | 32182.0 |
| 17 | rs62059004         | 44003893 | A    | G | 2.0051533547878417e-08 | 5.611556035410863  | 32182.0 |
| 17 | rs76500077         | 44004076 | T    | C | 2.0051533547878417e-08 | 5.611556035410863  | 32182.0 |
| 17 | rs62063303         | 44049133 | T    | C | 2.0080015992242932e-08 | 5.611310446231721  | 32181.0 |

|    |                              |          |                  |    |                        |                    |         |
|----|------------------------------|----------|------------------|----|------------------------|--------------------|---------|
| 17 | rs62061821                   | 44186055 | G                | A  | 2.0086773200486548e-08 | 5.611252232006368  | 32053.0 |
| 17 | 17:44155299_CT_C             | 44155299 | CT               | C  | 2.010064653789345e-08  | 5.611132770971892  | 32183.0 |
| 17 | 17:43914990_AAC_A            | 43914990 | AAC              | A  | 2.0103535063175102e-08 | 5.611107908422871  | 32137.0 |
| 17 | rs62056850                   | 43992581 | C                | T  | 2.0109454288619142e-08 | 5.611056970409697  | 32172.0 |
| 17 | rs55979424                   | 43900081 | C                | T  | 2.013392444311482e-08  | 5.61084654636672   | 32144.0 |
| 17 | rs55691306                   | 43978295 | G                | C  | 2.01396406982654e-08   | 5.610797426853619  | 32184.0 |
| 17 | 17:44201358_TG_T             | 44201358 | TG               | T  | 2.0173406078816967e-08 | 5.6105075583402835 | 32103.0 |
| 17 | rs55662347                   | 44070545 | G                | A  | 2.0197740191931856e-08 | 5.610298947133199  | 32185.0 |
| 17 | rs55913645                   | 44070956 | T                | A  | 2.0197740191931856e-08 | 5.610298947133199  | 32185.0 |
| 17 | rs17573175                   | 44071089 | C                | G  | 2.0197740191931856e-08 | 5.610298947133199  | 32185.0 |
| 17 | rs62063845                   | 44071294 | T                | C  | 2.0197740191931856e-08 | 5.610298947133199  | 32185.0 |
| 17 | rs55886080                   | 44072041 | T                | A  | 2.0197740191931856e-08 | 5.610298947133199  | 32185.0 |
| 17 | rs77527347                   | 44058017 | G                | T  | 2.0224158250830104e-08 | 5.610072746768979  | 32185.0 |
| 17 | rs62054834                   | 43934314 | T                | C  | 2.0243089568463703e-08 | 5.609910826790427  | 32157.0 |
| 17 | rs2316774                    | 43946642 | T                | C  | 2.026189625937031e-08  | 5.609750118247364  | 32176.0 |
| 17 | rs55929431                   | 44000202 | G                | A  | 2.026210926334569e-08  | 5.609748298897105  | 32177.0 |
| 17 | rs79860128                   | 43990072 | A                | G  | 2.028334967753644e-08  | 5.609566969393926  | 32183.0 |
| 17 | rs17563965                   | 43990919 | A                | G  | 2.028334967753644e-08  | 5.609566969393926  | 32183.0 |
| 17 | rs17563986                   | 43991272 | A                | G  | 2.028334967753644e-08  | 5.609566969393926  | 32183.0 |
| 17 | rs55682376                   | 43991888 | G                | A  | 2.028334967753644e-08  | 5.609566969393926  | 32183.0 |
| 17 | rs62056851                   | 43992806 | A                | G  | 2.028334967753644e-08  | 5.609566969393926  | 32183.0 |
| 17 | rs75046472                   | 43997499 | A                | T  | 2.028334967753644e-08  | 5.609566969393926  | 32183.0 |
| 17 | rs17564223                   | 43997520 | C                | T  | 2.028334967753644e-08  | 5.609566969393926  | 32183.0 |
| 17 | rs767056                     | 43998910 | C                | T  | 2.028334967753644e-08  | 5.609566969393926  | 32183.0 |
| 17 | rs767059                     | 43999100 | G                | C  | 2.028334967753644e-08  | 5.609566969393926  | 32183.0 |
| 17 | rs62058964                   | 43999406 | A                | G  | 2.028334967753644e-08  | 5.609566969393926  | 32183.0 |
| 17 | rs62058965                   | 43999529 | G                | C  | 2.028334967753644e-08  | 5.609566969393926  | 32183.0 |
| 17 | rs1052590                    | 44102638 | A                | G  | 2.028725915378252e-08  | 5.609533614268576  | 32175.0 |
| 17 | rs62063854                   | 44074619 | G                | A  | 2.0311656746170576e-08 | 5.609325598175318  | 32041.0 |
| 17 | rs17689918                   | 43910088 | G                | A  | 2.0318988751940103e-08 | 5.609263132229311  | 32176.0 |
| 17 | rs2950013                    | 43668455 | T                | G  | 2.032767662100854e-08  | 5.609189143156892  | 31782.0 |
| 17 | rs17652449                   | 44088937 | G                | C  | 2.033465803901513e-08  | 5.609129709090339  | 32184.0 |
| 17 | rs10445369                   | 43934776 | A                | G  | 2.0357042910289763e-08 | 5.608939276160251  | 32167.0 |
| 17 | rs62062802                   | 44028045 | G                | T  | 2.0360395590319967e-08 | 5.6089107716938535 | 32163.0 |
| 17 | rs62063846                   | 44071674 | A                | G  | 2.0360538269564084e-08 | 5.608909558736831  | 32184.0 |
| 17 | rs55736025                   | 44072017 | C                | A  | 2.0360538269564084e-08 | 5.608909558736831  | 32184.0 |
| 17 | rs62063850                   | 44073739 | G                | A  | 2.0360538269564084e-08 | 5.608909558736831  | 32184.0 |
| 17 | rs17652121                   | 44073973 | T                | C  | 2.0360538269564084e-08 | 5.608909558736831  | 32184.0 |
| 17 | 17:44127471_GTGGTTTCA<br>A_G | 44127471 | GTGGTTTCA<br>CCA | G  | 2.038116572968801e-08  | 5.608734285582871  | 32133.0 |
| 17 | rs62056848                   | 43992456 | G                | A  | 2.042491507366072e-08  | 5.6083631132386325 | 32182.0 |
| 17 | rs62056849                   | 43992463 | G                | C  | 2.042491507366072e-08  | 5.6083631132386325 | 32182.0 |
| 17 | rs76627340                   | 43937460 | G                | A  | 2.04477555551307e-08   | 5.6081696396352765 | 32179.0 |
| 17 | rs79889833                   | 43937633 | A                | G  | 2.04477555551307e-08   | 5.6081696396352765 | 32179.0 |
| 17 | rs77625338                   | 43937671 | C                | T  | 2.04477555551307e-08   | 5.6081696396352765 | 32179.0 |
| 17 | rs77489223                   | 43937736 | C                | T  | 2.04477555551307e-08   | 5.6081696396352765 | 32179.0 |
| 17 | rs17574040                   | 44102865 | A                | C  | 2.0474781140858214e-08 | 5.607940986317135  | 32177.0 |
| 17 | rs112887308                  | 44128754 | G                | GA | 2.049200399932537e-08  | 5.607795423001585  | 32184.0 |
| 17 | rs77426526                   | 43962982 | G                | A  | 2.050378112164755e-08  | 5.607695954055176  | 32186.0 |
| 17 | rs113894932                  | 44080408 | G                | C  | 2.0532677512599388e-08 | 5.6074521314949335 | 32178.0 |
| 17 | rs56189701                   | 43987801 | T                | C  | 2.054807645063801e-08  | 5.6073223340511    | 32149.0 |
| 17 | rs12150254                   | 44090455 | T                | C  | 2.054822041934163e-08  | 5.60732112098644   | 32183.0 |
| 17 | rs62062793                   | 44026321 | T                | C  | 2.0554484015322007e-08 | 5.6072683525940885 | 32176.0 |
| 17 | rs62062289                   | 44097235 | G                | C  | 2.0556428270556028e-08 | 5.607251976164834  | 32178.0 |
| 17 | rs1052587                    | 44102604 | T                | C  | 2.0556428270556028e-08 | 5.607251976164834  | 32178.0 |

|    |                    |          |      |    |                        |                    |         |
|----|--------------------|----------|------|----|------------------------|--------------------|---------|
| 17 | rs1052594          | 44102689 | G    | C  | 2.0556428270556028e-08 | 5.607251976164834  | 32178.0 |
| 17 | rs2696591          | 44318663 | G    | A  | 2.056528771538364e-08  | 5.607177372241979  | 32064.0 |
| 17 | rs62064665         | 44081527 | T    | C  | 2.0600690783049118e-08 | 5.6068795599886085 | 32180.0 |
| 17 | rs9468             | 44101563 | T    | C  | 2.061122948970679e-08  | 5.606791003861852  | 32101.0 |
| 17 | rs62057066         | 43858307 | T    | C  | 2.0617367472556333e-08 | 5.606739447010944  | 31951.0 |
| 17 | rs62062800         | 44027753 | A    | G  | 2.0652135015803413e-08 | 5.606447693092217  | 32169.0 |
| 17 | 17:43994508_GAGA_G | 43994508 | GAGA | G  | 2.0762018034686628e-08 | 5.605528728155333  | 32152.0 |
| 17 | rs17653906         | 44133142 | G    | A  | 2.0774020052264144e-08 | 5.605428640016315  | 32178.0 |
| 17 | rs62055468         | 43943000 | A    | C  | 2.0802925515605065e-08 | 5.605187819594768  | 32178.0 |
| 17 | rs62061793         | 44171565 | C    | A  | 2.085019095825281e-08  | 5.604794735473286  | 32029.0 |
| 17 | rs62063291         | 44043378 | T    | C  | 2.0851797495909337e-08 | 5.604781389873217  | 32186.0 |
| 17 | rs62056908         | 43783590 | G    | A  | 2.090715099540381e-08  | 5.604322173845836  | 31470.0 |
| 17 | rs7502888          | 43986992 | G    | C  | 2.091828292479801e-08  | 5.6042299652444445 | 32177.0 |
| 17 | rs111240522        | 44066874 | G    | A  | 2.093088659058055e-08  | 5.604125623359512  | 32186.0 |
| 17 | rs79193046         | 43967562 | T    | C  | 2.0995340010145992e-08 | 5.603592984958767  | 32185.0 |
| 17 | rs17576631         | 44170018 | G    | C  | 2.1007327134716083e-08 | 5.603494099320055  | 32113.0 |
| 17 | rs112596352        | 44170238 | G    | A  | 2.1007327134716083e-08 | 5.603494099320055  | 32113.0 |
| 17 | rs62061790         | 44170414 | G    | A  | 2.1007327134716083e-08 | 5.603494099320055  | 32113.0 |
| 17 | rs62061791         | 44171024 | T    | C  | 2.1007327134716083e-08 | 5.603494099320055  | 32113.0 |
| 17 | rs111295615        | 44184428 | T    | C  | 2.100909267676697e-08  | 5.603479539425275  | 32071.0 |
| 17 | rs55825513         | 44176215 | G    | A  | 2.101262419733787e-08  | 5.603450419600186  | 32144.0 |
| 17 | rs56294117         | 44042783 | G    | A  | 2.1033678242930907e-08 | 5.603276912993716  | 32178.0 |
| 17 | rs112415880        | 44042868 | G    | A  | 2.1033678242930907e-08 | 5.603276912993716  | 32178.0 |
| 17 | rs62063292         | 44043636 | C    | T  | 2.1033678242930907e-08 | 5.603276912993716  | 32178.0 |
| 17 | rs62063293         | 44043819 | G    | A  | 2.1033678242930907e-08 | 5.603276912993716  | 32178.0 |
| 17 | rs17650991         | 44044508 | A    | C  | 2.1033678242930907e-08 | 5.603276912993716  | 32178.0 |
| 17 | rs75145092         | 44044823 | T    | A  | 2.1033678242930907e-08 | 5.603276912993716  | 32178.0 |
| 17 | rs113857334        | 44044940 | T    | C  | 2.1033678242930907e-08 | 5.603276912993716  | 32178.0 |
| 17 | rs77513497         | 44045474 | A    | G  | 2.1033678242930907e-08 | 5.603276912993716  | 32178.0 |
| 17 | rs11079723         | 43841729 | T    | C  | 2.109304985955393e-08  | 5.602788537467838  | 32149.0 |
| 17 | rs56166491         | 44042221 | A    | G  | 2.1149179294952453e-08 | 5.602328056910987  | 32177.0 |
| 17 | rs112542080        | 44216966 | G    | GC | 2.1151697081037352e-08 | 5.602307429046258  | 32077.0 |
| 17 | rs12150516         | 43944519 | C    | T  | 2.1154585491671302e-08 | 5.602283767642748  | 32180.0 |
| 17 | rs62055475         | 43945106 | T    | C  | 2.1154585491671302e-08 | 5.602283767642748  | 32180.0 |
| 17 | rs5026246          | 43572896 | T    | G  | 2.11574002124724e-08   | 5.602260712911808  | 32186.0 |
| 17 | rs62064675         | 44088926 | C    | T  | 2.124982272241781e-08  | 5.6015053506988055 | 32186.0 |
| 17 | rs62064666         | 44082514 | T    | C  | 2.1269099254153042e-08 | 5.6013482070846905 | 32149.0 |
| 17 | rs62064662         | 44079721 | A    | G  | 2.129920190068361e-08  | 5.601103084561831  | 32181.0 |
| 17 | rs62063304         | 44049900 | A    | G  | 2.1350188287842538e-08 | 5.600688674246862  | 32182.0 |
| 17 | rs55711941         | 44040823 | C    | T  | 2.1355943887602283e-08 | 5.600641953887786  | 32177.0 |
| 17 | rs1967981          | 43999785 | C    | G  | 2.137726032023736e-08  | 5.600469026822507  | 32182.0 |
| 17 | rs1476127          | 43999793 | G    | A  | 2.137726032023736e-08  | 5.600469026822507  | 32182.0 |
| 17 | rs8079501          | 44000234 | A    | T  | 2.137726032023736e-08  | 5.600469026822507  | 32182.0 |
| 17 | rs56002706         | 44000505 | C    | T  | 2.137726032023736e-08  | 5.600469026822507  | 32182.0 |
| 17 | rs8078495          | 44000610 | G    | A  | 2.137726032023736e-08  | 5.600469026822507  | 32182.0 |
| 17 | rs17649866         | 44000914 | T    | C  | 2.137726032023736e-08  | 5.600469026822507  | 32182.0 |
| 17 | rs62058968         | 44001228 | G    | A  | 2.137726032023736e-08  | 5.600469026822507  | 32182.0 |
| 17 | rs17564493         | 44001379 | C    | T  | 2.137726032023736e-08  | 5.600469026822507  | 32182.0 |
| 17 | rs17649918         | 44001621 | A    | G  | 2.137726032023736e-08  | 5.600469026822507  | 32182.0 |
| 17 | rs17649954         | 44001661 | A    | G  | 2.137726032023736e-08  | 5.600469026822507  | 32182.0 |
| 17 | rs55685451         | 44001957 | T    | G  | 2.137726032023736e-08  | 5.600469026822507  | 32182.0 |
| 17 | rs17564591         | 44002062 | A    | C  | 2.137726032023736e-08  | 5.600469026822507  | 32182.0 |
| 17 | rs62059003         | 44002431 | C    | T  | 2.137726032023736e-08  | 5.600469026822507  | 32182.0 |
| 17 | rs17650063         | 44002555 | A    | G  | 2.137726032023736e-08  | 5.600469026822507  | 32182.0 |



|    |                    |          |      |      |                        |                    |         |
|----|--------------------|----------|------|------|------------------------|--------------------|---------|
| 17 | rs17564703         | 44002595 | C    | T    | 2.137726032023736e-08  | 5.600469026822507  | 32182.0 |
| 17 | rs17650651         | 44030311 | T    | G    | 2.13861670382034e-08   | 5.600396821693861  | 32148.0 |
| 17 | rs16940799         | 44102933 | T    | C    | 2.1424379914569368e-08 | 5.6000873678437175 | 32176.0 |
| 17 | rs62059005         | 44004472 | A    | G    | 2.1482651885109493e-08 | 5.599616502311225  | 32180.0 |
| 17 | rs55823844         | 43978320 | G    | A    | 2.1506049322335973e-08 | 5.599427788550347  | 32186.0 |
| 17 | rs62063294         | 44044157 | G    | A    | 2.1570200328179856e-08 | 5.598911394423793  | 32177.0 |
| 17 | rs17650973         | 44044220 | A    | T    | 2.1570200328179856e-08 | 5.598911394423793  | 32177.0 |
| 17 | rs62063295         | 44044431 | C    | T    | 2.1570200328179856e-08 | 5.598911394423793  | 32177.0 |
| 17 | rs150246512        | 43956305 | CTT  | C    | 2.160162792718521e-08  | 5.5986589566214535 | 32161.0 |
| 17 | rs62621252         | 43922942 | T    | C    | 2.1621822655600665e-08 | 5.598496933367898  | 32186.0 |
| 17 | rs62061706         | 44006896 | T    | C    | 2.1645671698472042e-08 | 5.5983057804527965 | 32176.0 |
| 17 | rs17649635         | 43995990 | A    | G    | 2.1689272191517988e-08 | 5.597956845264715  | 32180.0 |
| 17 | rs56113217         | 43926948 | A    | G    | 2.1707648046854728e-08 | 5.597809987030146  | 32136.0 |
| 17 | rs62054835         | 43934672 | A    | C    | 2.1710838798950122e-08 | 5.597784499114674  | 32167.0 |
| 17 | rs55996632         | 43935888 | C    | T    | 2.17152458316056e-08   | 5.5977493014574655 | 32186.0 |
| 17 | rs73984689         | 44184404 | G    | A    | 2.1722694190157173e-08 | 5.597689829396645  | 32063.0 |
| 17 | rs74903707         | 44028707 | G    | A    | 2.1746728410265376e-08 | 5.597498060997684  | 32163.0 |
| 17 | rs759528501        | 44275649 | CTAT | C    | 2.178580151748716e-08  | 5.59718673640575   | 32000.0 |
| 17 | rs56240566         | 44062689 | A    | C    | 2.1863618826398868e-08 | 5.59656831925668   | 32026.0 |
| 17 | rs2266497          | 44294786 | A    | G    | 2.187869440075451e-08  | 5.596448760189417  | 32086.0 |
| 17 | rs17573245         | 44072854 | T    | C    | 2.1879459930072432e-08 | 5.596442691179933  | 32183.0 |
| 17 | rs17565025         | 44012463 | T    | C    | 2.190504370122556e-08  | 5.596239985081231  | 32163.0 |
| 17 | rs16940671         | 43908151 | C    | T    | 2.191769321168216e-08  | 5.596139844993807  | 32122.0 |
| 17 | rs56269136         | 43926992 | C    | T    | 2.200243741791044e-08  | 5.595470409292952  | 32141.0 |
| 17 | rs79600142         | 43897722 | T    | C    | 2.2047745026196213e-08 | 5.595113528535139  | 32182.0 |
| 17 | rs2469922          | 44298178 | A    | G    | 2.214916955414281e-08  | 5.594317197521585  | 32099.0 |
| 17 | rs55707339         | 43842462 | T    | C    | 2.217040886929405e-08  | 5.594150886115777  | 32129.0 |
| 17 | rs62063782         | 44058716 | G    | T    | 2.2250973642615435e-08 | 5.593521438082791  | 32176.0 |
| 17 | rs2732594          | 44267170 | G    | T    | 2.225665583103918e-08  | 5.593477127020964  | 31842.0 |
| 17 | rs17649553         | 43994648 | C    | T    | 2.226241730961857e-08  | 5.593432208846341  | 32152.0 |
| 17 | 17:43974343_TCGC_T | 43974343 | TCGC | T    | 2.234995315041119e-08  | 5.592751138388787  | 31964.0 |
| 17 | rs62057103         | 43887480 | T    | C    | 2.2360508253951333e-08 | 5.5926691896621765 | 32058.0 |
| 17 | rs140819255        | 43966910 | A    | AAGG | 2.2376467460916907e-08 | 5.592545355319115  | 32150.0 |
| 17 | rs2696607          | 44319167 | G    | A    | 2.2392516148421694e-08 | 5.592420913082024  | 32031.0 |
| 17 | rs112137135        | 43900817 | A    | G    | 2.2398860446931987e-08 | 5.592371742984064  | 32174.0 |
| 17 | rs2429444          | 44298279 | C    | T    | 2.2408419383122358e-08 | 5.592297684063107  | 32078.0 |
| 17 | rs2696581          | 44227186 | G    | A    | 2.2415787192851507e-08 | 5.592240622062571  | 32154.0 |
| 17 | rs2696580          | 44227196 | T    | C    | 2.2415787192851507e-08 | 5.592240622062571  | 32154.0 |
| 17 | rs79348289         | 44172698 | T    | C    | 2.246224332649256e-08  | 5.591881248687842  | 32106.0 |
| 17 | rs75412750         | 44172773 | C    | T    | 2.246224332649256e-08  | 5.591881248687842  | 32106.0 |
| 17 | rs62061795         | 44173179 | C    | A    | 2.246224332649256e-08  | 5.591881248687842  | 32106.0 |
| 17 | rs17576709         | 44173356 | C    | G    | 2.246224332649256e-08  | 5.591881248687842  | 32106.0 |
| 17 | rs62061796         | 44173408 | G    | A    | 2.246224332649256e-08  | 5.591881248687842  | 32106.0 |
| 17 | rs62061802         | 44174351 | T    | A    | 2.246224332649256e-08  | 5.591881248687842  | 32106.0 |
| 17 | rs62061803         | 44174513 | C    | A    | 2.246224332649256e-08  | 5.591881248687842  | 32106.0 |
| 17 | rs79346219         | 44184375 | A    | G    | 2.2462871758023704e-08 | 5.59187639224148   | 32079.0 |
| 17 | rs5820609          | 44149210 | G    | GA   | 2.247740904625917e-08  | 5.5917640865518985 | 32112.0 |
| 17 | rs17659881         | 44157597 | A    | G    | 2.2482361687240428e-08 | 5.591725841750847  | 32186.0 |
| 17 | 17:44172205_CA_C   | 44172205 | CA   | C    | 2.2506511298593898e-08 | 5.591539473059084  | 32165.0 |
| 17 | rs17763634         | 43921754 | T    | C    | 2.254030042787556e-08  | 5.591279039291943  | 32175.0 |
| 17 | rs9897399          | 43804317 | A    | G    | 2.2544162955445285e-08 | 5.591249292536657  | 32174.0 |
| 17 | rs62056812         | 43987154 | G    | A    | 2.2554255885159875e-08 | 5.591171586493722  | 32141.0 |
| 17 | rs62063789         | 44061898 | T    | C    | 2.2590800910157905e-08 | 5.590890506349883  | 32171.0 |
| 17 | 17:43965429_TC_T   | 43965429 | TC   | T    | 2.259498795112708e-08  | 5.590858330587542  | 32081.0 |

|    |                     |          |       |                          |                        |                    |         |
|----|---------------------|----------|-------|--------------------------|------------------------|--------------------|---------|
| 17 | rs62056809          | 43984669 | A     | G                        | 2.26084232170706e-08   | 5.590755124921866  | 32071.0 |
| 17 | rs62062794          | 44026394 | A     | G                        | 2.2648300874907278e-08 | 5.590449146980902  | 32173.0 |
| 17 | rs112647192         | 43994623 | G     | A                        | 2.2661212566787092e-08 | 5.590350188710159  | 32178.0 |
| 17 | rs17572147          | 44044985 | A     | G                        | 2.2719841432509105e-08 | 5.589901530546952  | 32172.0 |
| 17 | rs17691328          | 43955487 | C     | T                        | 2.2725561525377265e-08 | 5.589857817648454  | 32177.0 |
| 17 | rs1724404           | 44323425 | C     | T                        | 2.2728024777920486e-08 | 5.589838996784283  | 31820.0 |
| 17 | 17:43897026_TGGAG_T | 43897026 | TGGAG | T                        | 2.276810923761204e-08  | 5.5895330031844255 | 32179.0 |
| 17 | rs55822644          | 43792090 | G     | C                        | 2.2813685885644554e-08 | 5.589185718397294  | 31606.0 |
| 17 | rs62054840          | 43936812 | G     | A                        | 2.2827009214957102e-08 | 5.589084324540231  | 32081.0 |
| 17 | rs56301449          | 43960918 | T     | C                        | 2.282812648724831e-08  | 5.589075824430315  | 32173.0 |
| 17 | rs8712              | 44101871 | A     | G                        | 2.2838663404886002e-08 | 5.5889956803384075 | 32091.0 |
| 17 | rs574194744         | 43837868 | T     | TTTA<br>TGTT<br>ATG<br>C | 2.289029924635972e-08  | 5.5886034548351615 | 32011.0 |
| 17 | rs112480703         | 44189799 | T     | C                        | 2.2890379266655776e-08 | 5.588602847668277  | 31855.0 |
| 17 | rs17651549          | 44061278 | C     | T                        | 2.2915118677303253e-08 | 5.588415232115014  | 32186.0 |
| 17 | rs113277432         | 44033169 | T     | C                        | 2.295873656098267e-08  | 5.588084926816107  | 31726.0 |
| 17 | rs17661015          | 44192957 | T     | C                        | 2.297864818525149e-08  | 5.587934344436785  | 31798.0 |
| 17 | rs113651837         | 43895168 | T     | TG                       | 2.302673054622678e-08  | 5.587571241393355  | 32097.0 |
| 17 | rs17690176          | 43916773 | A     | C                        | 2.309815100705541e-08  | 5.587033252441702  | 32177.0 |
| 17 | rs2429445           | 44298209 | T     | C                        | 2.311034475758325e-08  | 5.586941561967222  | 32098.0 |
| 17 | rs200860866         | 43773525 | T     | TAAA<br>A                | 2.312408037286556e-08  | 5.586838333718744  | 32116.0 |
| 17 | rs80143279          | 43776742 | T     | C                        | 2.3125131072791592e-08 | 5.586830439769359  | 32087.0 |
| 17 | rs62062795          | 44027090 | C     | T                        | 2.3128687635217146e-08 | 5.586803721761003  | 32171.0 |
| 17 | rs878887            | 43912582 | C     | T                        | 2.3134346907889454e-08 | 5.586761215756437  | 32181.0 |
| 17 | rs878888            | 43912635 | A     | G                        | 2.3134346907889454e-08 | 5.586761215756437  | 32181.0 |
| 17 | rs4525537           | 43912723 | T     | C                        | 2.3134346907889454e-08 | 5.586761215756437  | 32181.0 |
| 17 | rs4640231           | 43912786 | G     | C                        | 2.3134346907889454e-08 | 5.586761215756437  | 32181.0 |
| 17 | rs4482334           | 43912830 | T     | C                        | 2.3134346907889454e-08 | 5.586761215756437  | 32181.0 |
| 17 | rs62055945          | 43851851 | G     | A                        | 2.3137823991302453e-08 | 5.586735104875023  | 32168.0 |
| 17 | rs56043078          | 43853235 | T     | G                        | 2.3137823991302453e-08 | 5.586735104875023  | 32168.0 |
| 17 | rs77965652          | 43853457 | A     | G                        | 2.3137823991302453e-08 | 5.586735104875023  | 32168.0 |
| 17 | rs55849949          | 43853526 | A     | G                        | 2.3137823991302453e-08 | 5.586735104875023  | 32168.0 |
| 17 | rs55991914          | 43854267 | C     | T                        | 2.3137823991302453e-08 | 5.586735104875023  | 32168.0 |
| 17 | rs62055955          | 43854340 | A     | G                        | 2.3137823991302453e-08 | 5.586735104875023  | 32168.0 |
| 17 | rs62056879          | 43781426 | T     | C                        | 2.3143566343446548e-08 | 5.586691991475843  | 32145.0 |
| 17 | 17:44316878_CA_C    | 44316878 | CA    | C                        | 2.3160558943850765e-08 | 5.586564472363511  | 32166.0 |
| 17 | rs2696670           | 44317103 | T     | C                        | 2.3160558943850765e-08 | 5.586564472363511  | 32166.0 |
| 17 | rs62063675          | 44126575 | C     | T                        | 2.3178859883039577e-08 | 5.586427236494498  | 32159.0 |
| 17 | rs12150235          | 44015745 | A     | G                        | 2.3211123442934252e-08 | 5.586185553070111  | 32182.0 |
| 17 | rs55780945          | 44040120 | C     | T                        | 2.322069747951333e-08  | 5.58611389755841   | 32168.0 |
| 17 | rs17652066          | 44073145 | G     | C                        | 2.322832702468717e-08  | 5.586056815843847  | 32171.0 |
| 17 | rs2696582           | 44226561 | T     | G                        | 2.3229301186047573e-08 | 5.586049528803357  | 32056.0 |
| 17 | 17:44264269_GT_G    | 44264269 | GT    | G                        | 2.3266999489102326e-08 | 5.585767760962954  | 30519.0 |
| 17 | rs2316784           | 44021699 | G     | T                        | 2.329425428993004e-08  | 5.585564326683442  | 31990.0 |
| 17 | rs4327091           | 44021717 | G     | A                        | 2.329425428993004e-08  | 5.585564326683442  | 31990.0 |
| 17 | rs10445334          | 43934826 | T     | G                        | 2.3294742720806736e-08 | 5.5855606830633295 | 32166.0 |
| 17 | rs17689882          | 43906828 | G     | A                        | 2.3343065536021888e-08 | 5.585200568283975  | 32186.0 |
| 17 | rs62056810          | 43984672 | T     | C                        | 2.3389279808623214e-08 | 5.584856843204876  | 32077.0 |
| 17 | rs77044307          | 44172408 | C     | G                        | 2.339402061029441e-08  | 5.584821620120801  | 32105.0 |
| 17 | rs16940672          | 43908152 | C     | T                        | 2.33954920851012e-08   | 5.584810688804753  | 32122.0 |
| 17 | rs62062779          | 44022577 | A     | C                        | 2.3428869861497443e-08 | 5.5845629105173815 | 32118.0 |
| 17 | rs79892630          | 43781505 | C     | T                        | 2.3504715502436075e-08 | 5.584001145571412  | 32168.0 |
| 17 | rs56303031          | 43853922 | G     | A                        | 2.352763939962284e-08  | 5.583831701657067  | 32166.0 |
| 17 | rs17564619          | 44002138 | A     | G                        | 2.3550667496219512e-08 | 5.583661648804454  | 32181.0 |
| 17 | rs62062784          | 44024552 | C     | G                        | 2.3648205331295163e-08 | 5.582943157672171  | 32186.0 |

|    |                    |          |      |                              |                        |                    |         |
|----|--------------------|----------|------|------------------------------|------------------------|--------------------|---------|
| 17 | rs1078268          | 44075901 | A    | G                            | 2.3649775099762645e-08 | 5.5829316178498045 | 32115.0 |
| 17 | rs17650579         | 44030115 | C    | T                            | 2.3662006267274658e-08 | 5.582841728452546  | 32151.0 |
| 17 | rs62062803         | 44028183 | T    | C                            | 2.3721100561467915e-08 | 5.5824080665057805 | 32148.0 |
| 17 | rs62055950         | 43853133 | T    | C                            | 2.3727564999845942e-08 | 5.582360691034778  | 32167.0 |
| 17 | rs142222997        | 44057770 | G    | GCAG<br>GAGA<br>ATTG<br>TTAC | 2.372806233586224e-08  | 5.582357046762584  | 32153.0 |
| 17 | rs1078269          | 44075837 | T    | C                            | 2.3731875584831315e-08 | 5.582329107317793  | 32114.0 |
| 17 | rs2458207          | 44296251 | T    | C                            | 2.3774940628084777e-08 | 5.582013874473717  | 32078.0 |
| 17 | 17:44303525_G_A    | 44303525 | G    | A                            | 2.3774940628084777e-08 | 5.582013874473717  | 32144.0 |
| 17 | 17:44129997_AAAC_A | 44129997 | AAAC | A                            | 2.3817749485558042e-08 | 5.5817010656830774 | 32168.0 |
| 17 | rs2532385          | 44313950 | C    | A                            | 2.3830232287878798e-08 | 5.581609955298768  | 32165.0 |
| 17 | rs2696675          | 44314066 | A    | G                            | 2.3830232287878798e-08 | 5.581609955298768  | 32165.0 |
| 17 | rs74872829         | 43938394 | A    | G                            | 2.3835893270730723e-08 | 5.581568651771797  | 32148.0 |
| 17 | rs62054384         | 43804306 | T    | C                            | 2.384072279783808e-08  | 5.581533422217611  | 32176.0 |
| 17 | rs62054388         | 43805590 | C    | T                            | 2.385055134869469e-08  | 5.5814617480830275 | 32173.0 |
| 17 | rs62057107         | 43896032 | C    | T                            | 2.38519676536656e-08   | 5.581451422124736  | 32172.0 |
| 17 | rs62055946         | 43851971 | C    | A                            | 2.391277977796735e-08  | 5.581008615132913  | 32167.0 |
| 17 | rs62062813         | 44032956 | G    | A                            | 2.3916538589328623e-08 | 5.580981281009078  | 32096.0 |
| 17 | rs76761706         | 43776741 | T    | C                            | 2.3939354463456367e-08 | 5.5808154530965375 | 32079.0 |
| 17 | rs140713557        | 43953179 | A    | G                            | 2.3976507177097885e-08 | 5.580545751672484  | 32178.0 |
| 17 | rs62063852         | 44074581 | A    | G                            | 2.3991752770560137e-08 | 5.5804351972119575 | 32128.0 |
| 17 | rs62070943         | 44304203 | T    | C                            | 2.404040105290708e-08  | 5.580082876244683  | 32148.0 |
| 17 | 17:44304298_T_A    | 44304298 | T    | A                            | 2.404040105290708e-08  | 5.580082876244683  | 32148.0 |
| 17 | rs681485           | 43707619 | C    | A                            | 2.4123072421269024e-08 | 5.579485737115928  | 32186.0 |
| 17 | rs76070179         | 44304490 | T    | C                            | 2.4219465851401122e-08 | 5.5787919858737505 | 32148.0 |
| 17 | 17:44303606_AG_A   | 44303606 | AG   | A                            | 2.42214956783502e-08   | 5.578777405874453  | 32146.0 |
| 17 | 17:43839150_AT_A   | 43839150 | AT   | A                            | 2.4311312895873574e-08 | 5.578133444061779  | 32080.0 |
| 17 | rs112947543        | 44025678 | G    | GCT                          | 2.4313520056940785e-08 | 5.578117648480986  | 32007.0 |
| 17 | rs62057061         | 43856639 | C    | G                            | 2.435124190939233e-08  | 5.577847906411751  | 32186.0 |
| 17 | rs17650597         | 44030195 | A    | T                            | 2.4439226834316985e-08 | 5.577220315103852  | 32152.0 |
| 17 | rs17650633         | 44030231 | T    | C                            | 2.4439226834316985e-08 | 5.577220315103852  | 32152.0 |
| 17 | rs2696684          | 44244397 | G    | A                            | 2.454251257903789e-08  | 5.576486375966784  | 32035.0 |
| 17 | rs55690782         | 44137311 | G    | A                            | 2.455539067902188e-08  | 5.576394023877961  | 32172.0 |
| 17 | rs55649944         | 44119463 | C    | T                            | 2.457577783777457e-08  | 5.576250634164416  | 32001.0 |
| 17 | rs56406462         | 44119474 | T    | C                            | 2.457577783777457e-08  | 5.576250634164416  | 32001.0 |
| 17 | rs62055544         | 43964539 | A    | G                            | 2.458873579733959e-08  | 5.576158888448607  | 31836.0 |
| 17 | rs112836774        | 44084002 | T    | C                            | 2.4595603655313872e-08 | 5.576110281256318  | 31863.0 |
| 17 | 17:44301546_T_C    | 44301546 | T    | C                            | 2.463255062043791e-08  | 5.575849015336753  | 32123.0 |
| 17 | rs9891103          | 44091886 | C    | T                            | 2.4677992479175507e-08 | 5.57552819987605   | 32099.0 |
| 17 | rs62057065         | 43858187 | G    | T                            | 2.468281688747977e-08  | 5.575494173656655  | 32159.0 |
| 17 | rs56146262         | 43931907 | C    | A                            | 2.4692813245862743e-08 | 5.575423690567899  | 32143.0 |
| 17 | rs2316765          | 43912454 | T    | C                            | 2.4730162305002508e-08 | 5.575160591759628  | 32183.0 |
| 17 | rs878886           | 43912490 | C    | G                            | 2.4730162305002508e-08 | 5.575160591759628  | 32183.0 |
| 17 | rs56127111         | 43913315 | C    | T                            | 2.4730162305002508e-08 | 5.575160591759628  | 32183.0 |
| 17 | 17:44303668_G_T    | 44303668 | G    | T                            | 2.473344269343896e-08  | 5.575137502072276  | 32138.0 |
| 17 | rs2696444          | 44288672 | G    | A                            | 2.4741559171207692e-08 | 5.575080385349303  | 32028.0 |
| 17 | rs3029044          | 43907641 | C    | CAGG<br>TGG                  | 2.475244280072053e-08  | 5.575003824349705  | 32182.0 |
| 17 | rs56406407         | 43792099 | T    | C                            | 2.4791870414042102e-08 | 5.5747267437098165 | 31597.0 |
| 17 | rs450237           | 43709225 | T    | C                            | 2.481775657989016e-08  | 5.57454505912033   | 32012.0 |
| 17 | rs199504614        | 43781720 | T    | TAAA<br>AAAA<br>AGAC         | 2.4830492936351112e-08 | 5.5744557352514414 | 32172.0 |
| 17 | rs62055938         | 43849656 | C    | A                            | 2.4836993545544104e-08 | 5.574410161677257  | 32164.0 |
| 17 | rs62055939         | 43849787 | A    | T                            | 2.4836993545544104e-08 | 5.574410161677257  | 32164.0 |
| 17 | rs62055940         | 43849896 | A    | G                            | 2.4836993545544104e-08 | 5.574410161677257  | 32164.0 |
| 17 | rs76885724         | 43850519 | C    | T                            | 2.4836993545544104e-08 | 5.574410161677257  | 32164.0 |

|    |                               |          |                 |     |                        |                    |         |
|----|-------------------------------|----------|-----------------|-----|------------------------|--------------------|---------|
| 17 | rs62055942                    | 43850966 | A               | G   | 2.4836993545544104e-08 | 5.574410161677257  | 32164.0 |
| 17 | rs62055943                    | 43851018 | T               | C   | 2.4836993545544104e-08 | 5.574410161677257  | 32164.0 |
| 17 | rs62055957                    | 43854536 | C               | A   | 2.4836993545544104e-08 | 5.574410161677257  | 32164.0 |
| 17 | rs16940677                    | 43911898 | C               | T   | 2.4893662721145408e-08 | 5.5740133628557516 | 32180.0 |
| 17 | rs78328427                    | 43916932 | G               | A   | 2.489453153383575e-08  | 5.574007286235749  | 32180.0 |
| 17 | rs55920545                    | 43803773 | A               | AG  | 2.490913203201084e-08  | 5.5739051987113335 | 32169.0 |
| 17 | rs4074462                     | 43855228 | G               | T   | 2.4937574932236062e-08 | 5.573706490967775  | 32165.0 |
| 17 | rs62063855                    | 44075535 | T               | C   | 2.502746128510316e-08  | 5.573079969850911  | 32104.0 |
| 17 | rs62062805                    | 44030773 | A               | G   | 2.5059971511023737e-08 | 5.572853906412462  | 32130.0 |
| 17 | rs76839282                    | 44029178 | G               | C   | 2.5082980865804005e-08 | 5.572694080269824  | 32155.0 |
| 17 | rs373685009                   | 43790598 | G               | GAA | 2.5097426962805417e-08 | 5.572593808387332  | 32091.0 |
| 17 | rs79501144                    | 43900697 | C               | T   | 2.5126869687052632e-08 | 5.572389616635845  | 32177.0 |
| 17 | rs62057123                    | 43901238 | A               | G   | 2.5126869687052632e-08 | 5.572389616635845  | 32177.0 |
| 17 | rs62055901                    | 43845041 | G               | A   | 2.518032094527859e-08  | 5.5720195131503285 | 32156.0 |
| 17 | rs17689608                    | 43896528 | C               | G   | 2.51884053682048e-08   | 5.571963601942153  | 32174.0 |
| 17 | rs62057108                    | 43896616 | T               | C   | 2.51884053682048e-08   | 5.571963601942153  | 32174.0 |
| 17 | rs62057109                    | 43896637 | T               | C   | 2.51884053682048e-08   | 5.571963601942153  | 32174.0 |
| 17 | rs62057110                    | 43896734 | T               | C   | 2.51884053682048e-08   | 5.571963601942153  | 32174.0 |
| 17 | rs62057113                    | 43897449 | A               | T   | 2.51884053682048e-08   | 5.571963601942153  | 32174.0 |
| 17 | rs17762361                    | 43781778 | A               | G   | 2.52341477860469e-08   | 5.571647578787278  | 32153.0 |
| 17 | rs17650818                    | 44036787 | T               | C   | 2.5308741236099104e-08 | 5.571133421503205  | 32140.0 |
| 17 | rs12150260                    | 44090538 | T               | G   | 2.537106751487499e-08  | 5.57070494582015   | 32096.0 |
| 17 | rs56971664                    | 43918613 | T               | C   | 2.5416159702107087e-08 | 5.570395586080085  | 32177.0 |
| 17 | rs10514904                    | 44207887 | C               | T   | 2.5450318931372344e-08 | 5.570161587441014  | 32069.0 |
| 17 | rs2532392                     | 44309856 | G               | A   | 2.545333775221642e-08  | 5.5701409224791645 | 32110.0 |
| 17 | rs2469927                     | 44310164 | T               | C   | 2.545333775221642e-08  | 5.5701409224791645 | 32110.0 |
| 17 | rs3108507                     | 44310234 | T               | C   | 2.545333775221642e-08  | 5.5701409224791645 | 32110.0 |
| 17 | rs62056808                    | 43984646 | T               | C   | 2.5454758495237828e-08 | 5.570131197782981  | 32075.0 |
| 17 | rs62055879                    | 43836578 | G               | A   | 2.546701563074139e-08  | 5.570047322059152  | 32151.0 |
| 17 | rs2469934                     | 43704419 | T               | C   | 2.549421513684253e-08  | 5.569861335356797  | 32166.0 |
| 17 | rs373853                      | 43704491 | G               | A   | 2.549421513684253e-08  | 5.569861335356797  | 32166.0 |
| 17 | rs71363552                    | 43834671 | A               | AC  | 2.550488938084501e-08  | 5.569788398867682  | 32101.0 |
| 17 | rs62057062                    | 43856710 | G               | A   | 2.5542729238989054e-08 | 5.569530079745685  | 32165.0 |
| 17 | 17:44028469_CA_C              | 44028469 | CA              | C   | 2.5553958215731657e-08 | 5.5694534950073376 | 32137.0 |
| 17 | 17:43918301_GCCAGGAGTTCGAGA G | 43918301 | GCCAGGAGTTCGAGA | G   | 2.5564478629099384e-08 | 5.569381772495007  | 32144.0 |
| 17 | rs2873268                     | 43930955 | G               | A   | 2.5593922667447655e-08 | 5.569181191062268  | 32155.0 |
| 17 | rs62071573                    | 44342994 | C               | T   | 2.559722604042624e-08  | 5.5691587014887975 | 31379.0 |
| 17 | rs55787105                    | 43853109 | G               | A   | 2.561008638971493e-08  | 5.569071174231227  | 32161.0 |
| 17 | rs76294809                    | 43849327 | G               | A   | 2.5616518939105715e-08 | 5.5690274104419775 | 32163.0 |
| 17 | rs2732593                     | 44267164 | C               | T   | 2.5628226667605576e-08 | 5.568947784384376  | 31825.0 |
| 17 | rs2696568                     | 44266342 | T               | C   | 2.566427646851236e-08  | 5.568702825666077  | 31947.0 |
| 17 | rs62055900                    | 43845002 | C               | G   | 2.5693026633242585e-08 | 5.568507707266639  | 32152.0 |
| 17 | rs17334923                    | 43827244 | C               | T   | 2.5735178848569517e-08 | 5.5682220160543725 | 32163.0 |
| 17 | 17:44219831_T_A               | 44219831 | T               | A   | 2.5765983774991066e-08 | 5.568013519377291  | 32083.0 |
| 17 | rs78917495                    | 43858482 | C               | T   | 2.5820587215582816e-08 | 5.567644541173142  | 32155.0 |
| 17 | rs56070245                    | 43847868 | T               | C   | 2.5856000493129383e-08 | 5.567405643486248  | 32168.0 |
| 17 | rs56387266                    | 43847912 | T               | C   | 2.5856000493129383e-08 | 5.567405643486248  | 32168.0 |
| 17 | rs150334020                   | 44078680 | T               | TA  | 2.586474849754748e-08  | 5.567346678426727  | 32174.0 |
| 17 | rs62055885                    | 43838014 | A               | G   | 2.5918201297065425e-08 | 5.566986804988088  | 32148.0 |
| 17 | rs113793114                   | 44037079 | G               | A   | 2.593745994501312e-08  | 5.566857321727959  | 32141.0 |
| 17 | rs76830096                    | 43857129 | A               | C   | 2.5944877811156505e-08 | 5.566807473462673  | 32167.0 |
| 17 | rs62063277                    | 44036462 | T               | A   | 2.598643818123028e-08  | 5.5665284421954295 | 32141.0 |
| 17 | rs56180212                    | 43960911 | A               | G   | 2.600139412278229e-08  | 5.5664281357753085 | 32159.0 |
| 17 | rs62057070                    | 43859640 | A               | G   | 2.6033963780078528e-08 | 5.566209891380319  | 32182.0 |

|    |                         |          |            |     |                        |                    |         |
|----|-------------------------|----------|------------|-----|------------------------|--------------------|---------|
| 17 | rs62057071              | 43859691 | C          | G   | 2.6033963780078528e-08 | 5.566209891380319  | 32182.0 |
| 17 | rs141412361             | 44102443 | C          | CCT | 2.6062756301698208e-08 | 5.566017177544046  | 32161.0 |
| 17 | rs62057069              | 43859065 | T          | C   | 2.6139658657488088e-08 | 5.565503466489539  | 32179.0 |
| 17 | 17:44107321_CT_C        | 44107321 | CT         | C   | 2.6149959486481147e-08 | 5.565434767917551  | 31867.0 |
| 17 | rs62057064              | 43857033 | C          | T   | 2.6183076687161224e-08 | 5.565214079570914  | 32163.0 |
| 17 | rs62062780              | 44022593 | C          | T   | 2.618344184388564e-08  | 5.565211647728252  | 32115.0 |
| 17 | rs55787734              | 43799052 | A          | G   | 2.6210751445570054e-08 | 5.565029866553965  | 32013.0 |
| 17 | rs17763596              | 43921210 | G          | T   | 2.62352533429196e-08   | 5.564866930688727  | 32183.0 |
| 17 | rs62061707              | 44006954 | T          | C   | 2.6285424143734787e-08 | 5.56453375870656   | 32031.0 |
| 17 | rs242561                | 44026548 | T          | C   | 2.631549835776017e-08  | 5.564334338933666  | 32165.0 |
| 17 | rs62054382              | 43802525 | C          | T   | 2.6346524752505835e-08 | 5.564128836965827  | 32180.0 |
| 17 | rs392116                | 43703555 | A          | G   | 2.636104051000369e-08  | 5.564032773106753  | 32165.0 |
| 17 | rs385383                | 43704031 | C          | A   | 2.636104051000369e-08  | 5.564032773106753  | 32165.0 |
| 17 | rs17660228              | 44166500 | G          | A   | 2.636729021058442e-08  | 5.563991429008754  | 32160.0 |
| 17 | 17:43721690_CAAAAAAAA_C | 43721690 | CAAAAAAAAA | C   | 2.6396628050929803e-08 | 5.563797475274549  | 32173.0 |
| 17 | rs57631148              | 44304740 | A          | T   | 2.6430604210742e-08    | 5.56357311864762   | 32149.0 |
| 17 | rs445354                | 44305252 | G          | A   | 2.6430604210742e-08    | 5.56357311864762   | 32149.0 |
| 17 | rs62064661              | 44078892 | G          | A   | 2.643687007575164e-08  | 5.563531773488172  | 32177.0 |
| 17 | rs4309444               | 43895797 | T          | C   | 2.646471548422541e-08  | 5.563348151185262  | 32167.0 |
| 17 | rs34303488              | 43848181 | C          | T   | 2.6478279774897752e-08 | 5.563258771435863  | 32167.0 |
| 17 | rs62055899              | 43844977 | T          | A   | 2.6499054642428954e-08 | 5.5631219648328365 | 32152.0 |
| 17 | 17:44304910_G_C         | 44304910 | G          | C   | 2.6583055225480688e-08 | 5.562569863564368  | 32139.0 |
| 17 | rs62055894              | 43843943 | G          | A   | 2.6601407164700777e-08 | 5.562449469176508  | 32163.0 |
| 17 | rs62055903              | 43846668 | C          | A   | 2.660446702829371e-08  | 5.5624294033664885 | 32166.0 |
| 17 | rs111374028             | 43846820 | G          | A   | 2.660446702829371e-08  | 5.5624294033664885 | 32166.0 |
| 17 | rs113934115             | 43847039 | C          | T   | 2.660446702829371e-08  | 5.5624294033664885 | 32166.0 |
| 17 | rs10445362              | 43914554 | C          | A   | 2.66054870594836e-08   | 5.562422714758152  | 32184.0 |
| 17 | rs10445363              | 43914558 | G          | A   | 2.66054870594836e-08   | 5.562422714758152  | 32184.0 |
| 17 | rs62054802              | 43914598 | G          | C   | 2.66054870594836e-08   | 5.562422714758152  | 32184.0 |
| 17 | rs62054803              | 43914728 | G          | T   | 2.66054870594836e-08   | 5.562422714758152  | 32184.0 |
| 17 | rs62054805              | 43915054 | A          | G   | 2.66054870594836e-08   | 5.562422714758152  | 32184.0 |
| 17 | rs62054806              | 43915312 | C          | T   | 2.66054870594836e-08   | 5.562422714758152  | 32184.0 |
| 17 | rs10445364              | 43916356 | G          | A   | 2.66054870594836e-08   | 5.562422714758152  | 32184.0 |
| 17 | rs10445333              | 43916509 | A          | G   | 2.66054870594836e-08   | 5.562422714758152  | 32184.0 |
| 17 | rs17763533              | 43918190 | T          | C   | 2.66054870594836e-08   | 5.562422714758152  | 32184.0 |
| 17 | rs112583797             | 43918418 | A          | G   | 2.66054870594836e-08   | 5.562422714758152  | 32184.0 |
| 17 | rs74922289              | 43918524 | A          | G   | 2.66054870594836e-08   | 5.562422714758152  | 32184.0 |
| 17 | rs56150806              | 43919301 | T          | C   | 2.66054870594836e-08   | 5.562422714758152  | 32184.0 |
| 17 | rs17690314              | 43919884 | T          | G   | 2.66054870594836e-08   | 5.562422714758152  | 32184.0 |
| 17 | rs56233672              | 43920300 | T          | C   | 2.66054870594836e-08   | 5.562422714758152  | 32184.0 |
| 17 | rs56354807              | 43920378 | C          | T   | 2.66054870594836e-08   | 5.562422714758152  | 32184.0 |
| 17 | rs55718212              | 43920411 | T          | C   | 2.66054870594836e-08   | 5.562422714758152  | 32184.0 |
| 17 | rs17690326              | 43920974 | T          | C   | 2.66054870594836e-08   | 5.562422714758152  | 32184.0 |
| 17 | rs62054814              | 43921572 | T          | A   | 2.66054870594836e-08   | 5.562422714758152  | 32184.0 |
| 17 | rs78074121              | 43896690 | T          | C   | 2.66708488476045e-08   | 5.561994638627192  | 32170.0 |
| 17 | rs55962674              | 43799033 | C          | T   | 2.6696237436012492e-08 | 5.5618286347598564 | 32166.0 |
| 17 | rs55653963              | 43799509 | A          | C   | 2.6696237436012492e-08 | 5.5618286347598564 | 32166.0 |
| 17 | rs62054378              | 43799667 | C          | A   | 2.6696237436012492e-08 | 5.5618286347598564 | 32166.0 |
| 17 | rs77819001              | 43799804 | C          | A   | 2.6696237436012492e-08 | 5.5618286347598564 | 32166.0 |
| 17 | rs76667867              | 43799810 | G          | C   | 2.6696237436012492e-08 | 5.5618286347598564 | 32166.0 |
| 17 | rs2532294               | 44233433 | G          | C   | 2.6718017935680107e-08 | 5.561686344505663  | 32038.0 |
| 17 | rs2532293               | 44233589 | T          | C   | 2.6718017935680107e-08 | 5.561686344505663  | 32038.0 |
| 17 | rs17662235              | 44233776 | T          | C   | 2.6718017935680107e-08 | 5.561686344505663  | 32038.0 |
| 17 | rs17585214              | 44233811 | C          | T   | 2.6718017935680107e-08 | 5.561686344505663  | 32038.0 |

|    |                    |          |      |     |                        |                    |         |
|----|--------------------|----------|------|-----|------------------------|--------------------|---------|
| 17 | rs1528074          | 44234060 | A    | G   | 2.6718017935680107e-08 | 5.561686344505663  | 32038.0 |
| 17 | rs1406068          | 44234526 | C    | T   | 2.6718017935680107e-08 | 5.561686344505663  | 32038.0 |
| 17 | rs79772576         | 44106220 | A    | G   | 2.6763962929126413e-08 | 5.5613865583460536 | 32186.0 |
| 17 | rs4479288          | 43793828 | G    | A   | 2.6765362063046315e-08 | 5.561377436984622  | 32153.0 |
| 17 | 17:44106515_AAAG_A | 44106515 | AAAG | A   | 2.67688135665658e-08   | 5.561354937606549  | 32166.0 |
| 17 | rs12185235         | 43923703 | C    | T   | 2.6773851678981403e-08 | 5.561322100625653  | 32176.0 |
| 17 | rs112493812        | 44314179 | G    | A   | 2.680372623749612e-08  | 5.561127509873339  | 32152.0 |
| 17 | rs62056880         | 43782304 | T    | C   | 2.6812694974362482e-08 | 5.56106913223524   | 32174.0 |
| 17 | rs8073146          | 43893751 | A    | G   | 2.6818488846764685e-08 | 5.561031429909475  | 32046.0 |
| 17 | rs113263403        | 44016011 | A    | AT  | 2.6818488846764685e-08 | 5.561031429909475  | 32173.0 |
| 17 | rs1526126          | 43812218 | C    | T   | 2.681951692003017e-08  | 5.5610247407788655 | 32170.0 |
| 17 | rs1526128          | 43779624 | C    | T   | 2.68303607716788e-08   | 5.560954200703983  | 32067.0 |
| 17 | rs1526129          | 43779657 | T    | C   | 2.6843266813114168e-08 | 5.560870281977056  | 32178.0 |
| 17 | rs75916678         | 43849366 | T    | C   | 2.6911357863414442e-08 | 5.560428181899663  | 32139.0 |
| 17 | rs62056878         | 43780561 | C    | T   | 2.6970594733975595e-08 | 5.560044452075112  | 32149.0 |
| 17 | 17:43898362_AAGG_A | 43898362 | AAGG | A   | 2.6970594733975595e-08 | 5.560044452075112  | 32126.0 |
| 17 | rs144416125        | 44296523 | G    | A   | 2.697943017417813e-08  | 5.5599872871818805 | 32081.0 |
| 17 | rs436667           | 43709415 | C    | T   | 2.701630643279994e-08  | 5.559748895446765  | 32186.0 |
| 17 | rs56268325         | 43847741 | T    | C   | 2.702459156395899e-08  | 5.559695378498542  | 32167.0 |
| 17 | rs192252295        | 43702296 | T    | C   | 2.7073128366718446e-08 | 5.559382179514583  | 32116.0 |
| 17 | rs62054383         | 43802907 | T    | C   | 2.7080864437636863e-08 | 5.559332310432877  | 32176.0 |
| 17 | rs62055928         | 43847374 | G    | A   | 2.7107296623152422e-08 | 5.559162024716722  | 32165.0 |
| 17 | rs62054809         | 43918239 | C    | T   | 2.71114525506186e-08   | 5.559135265385506  | 32176.0 |
| 17 | rs113399561        | 44205350 | A    | ATT | 2.711183039317192e-08  | 5.5591328327170455 | 31828.0 |
| 17 | rs2696586          | 44225234 | T    | C   | 2.7114097556874947e-08 | 5.559118236699367  | 32064.0 |
| 17 | rs611351           | 43692935 | A    | G   | 2.7114947791168254e-08 | 5.559112763189669  | 32158.0 |
| 17 | 17:44296230_T_A    | 44296230 | T    | A   | 2.718589254668265e-08  | 5.558656631501583  | 32062.0 |
| 17 | rs62057073         | 43861117 | C    | T   | 2.7222950526661038e-08 | 5.558418830239973  | 32186.0 |
| 17 | rs2532416          | 44289291 | A    | C   | 2.7238224081290686e-08 | 5.5583209111554215 | 31953.0 |
| 17 | rs2532271          | 44248042 | G    | A   | 2.7241545530461914e-08 | 5.558299624327044  | 32037.0 |
| 17 | rs60814418         | 43850645 | C    | T   | 2.727820271026079e-08  | 5.558064859341171  | 32137.0 |
| 17 | rs17689104         | 43782492 | A    | G   | 2.7297785649227886e-08 | 5.557939568995677  | 32175.0 |
| 17 | rs56367860         | 44034673 | T    | G   | 2.7366148514128024e-08 | 5.557502870549703  | 32126.0 |
| 17 | rs77017444         | 44028796 | T    | C   | 2.742397808762933e-08  | 5.5571342839068665 | 32149.0 |
| 17 | rs17762882         | 43898887 | T    | C   | 2.742646190220844e-08  | 5.557118469788735  | 32171.0 |
| 17 | rs17689653         | 43898963 | A    | T   | 2.742646190220844e-08  | 5.557118469788735  | 32171.0 |
| 17 | rs62061708         | 44006956 | A    | G   | 2.7432767960248893e-08 | 5.557078326195367  | 32037.0 |
| 17 | 17:44293205_A_G    | 44293205 | A    | G   | 2.7467572365122473e-08 | 5.556856926578536  | 31186.0 |
| 17 | rs12185268         | 43923683 | A    | G   | 2.7476758758618253e-08 | 5.55679853501457   | 32186.0 |
| 17 | rs17689471         | 43892973 | T    | C   | 2.7525132621144225e-08 | 5.5564913679226215 | 32173.0 |
| 17 | rs62054387         | 43805525 | A    | C   | 2.7525803736099644e-08 | 5.556487110123924  | 32182.0 |
| 17 | rs55757142         | 43894485 | G    | GA  | 2.7547863578619313e-08 | 5.556347210460618  | 32096.0 |
| 17 | rs62056934         | 43790005 | A    | G   | 2.7548823095162643e-08 | 5.556341127841767  | 32115.0 |
| 17 | rs56023973         | 43917776 | G    | T   | 2.755947592873085e-08  | 5.556273610633731  | 32182.0 |
| 17 | rs17763515         | 43917818 | G    | A   | 2.755947592873085e-08  | 5.556273610633731  | 32182.0 |
| 17 | rs10514879         | 43802971 | C    | T   | 2.7592035258077573e-08 | 5.556067407854644  | 32178.0 |
| 17 | rs56082319         | 43844798 | G    | A   | 2.7607607893446665e-08 | 5.5559688676349115 | 32163.0 |
| 17 | rs1918792          | 44228529 | G    | A   | 2.762222708768328e-08  | 5.555876409651645  | 32039.0 |
| 17 | rs1918791          | 44228609 | C    | G   | 2.762222708768328e-08  | 5.555876409651645  | 32039.0 |
| 17 | rs2696576          | 44228770 | A    | G   | 2.762222708768328e-08  | 5.555876409651645  | 32039.0 |
| 17 | rs2696575          | 44228824 | A    | G   | 2.762222708768328e-08  | 5.555876409651645  | 32039.0 |
| 17 | rs2532300          | 44229986 | T    | C   | 2.762222708768328e-08  | 5.555876409651645  | 32039.0 |
| 17 | rs2696573          | 44230647 | C    | T   | 2.762222708768328e-08  | 5.555876409651645  | 32039.0 |
| 17 | rs2532299          | 44231117 | T    | C   | 2.762222708768328e-08  | 5.555876409651645  | 32039.0 |

|    |                    |          |      |   |                        |                    |         |
|----|--------------------|----------|------|---|------------------------|--------------------|---------|
| 17 | rs2532298          | 44231295 | G    | A | 2.762222708768328e-08  | 5.555876409651645  | 32039.0 |
| 17 | rs2532297          | 44231326 | G    | A | 2.762222708768328e-08  | 5.555876409651645  | 32039.0 |
| 17 | rs2696572          | 44231617 | A    | T | 2.762222708768328e-08  | 5.555876409651645  | 32039.0 |
| 17 | rs2109092          | 44232959 | G    | A | 2.762222708768328e-08  | 5.555876409651645  | 32039.0 |
| 17 | 17:43777957_AATC_A | 43777957 | AATC | A | 2.7666708336910344e-08 | 5.555595383113613  | 32072.0 |
| 17 | 17:43797157_TA_T   | 43797157 | TA   | T | 2.76892645768165e-08   | 5.5554530433141265 | 32182.0 |
| 17 | rs62063859         | 44078616 | G    | A | 2.7736942509953992e-08 | 5.555152544465806  | 32181.0 |
| 17 | rs62064660         | 44078832 | G    | A | 2.7736942509953992e-08 | 5.555152544465806  | 32181.0 |
| 17 | rs111520035        | 44039410 | A    | G | 2.774814979779533e-08  | 5.555081981252034  | 32154.0 |
| 17 | rs11079724         | 43841912 | C    | T | 2.7779573168309848e-08 | 5.554884281111722  | 32154.0 |
| 17 | rs17651093         | 44049550 | G    | A | 2.7831473765036232e-08 | 5.554558223188331  | 32181.0 |
| 17 | rs111985258        | 43795859 | A    | G | 2.784882739917257e-08  | 5.554449333118957  | 32183.0 |
| 17 | rs55943044         | 43872228 | G    | A | 2.786842356637587e-08  | 5.554326450792828  | 32171.0 |
| 17 | rs4617909          | 43806451 | C    | T | 2.788463456233309e-08  | 5.554224859322027  | 32179.0 |
| 17 | rs2532291          | 44238424 | G    | A | 2.7914070927013094e-08 | 5.554040533205699  | 32039.0 |
| 17 | rs17662403         | 44238938 | T    | C | 2.7914070927013094e-08 | 5.554040533205699  | 32039.0 |
| 17 | rs17585426         | 44238966 | T    | C | 2.7914070927013094e-08 | 5.554040533205699  | 32039.0 |
| 17 | rs2532288          | 44239958 | C    | T | 2.7914070927013094e-08 | 5.554040533205699  | 32039.0 |
| 17 | rs1918789          | 44240107 | T    | C | 2.7914070927013094e-08 | 5.554040533205699  | 32039.0 |
| 17 | rs2141299          | 44240986 | C    | A | 2.7914070927013094e-08 | 5.554040533205699  | 32039.0 |
| 17 | rs2696567          | 44241304 | C    | G | 2.7914070927013094e-08 | 5.554040533205699  | 32039.0 |
| 17 | rs2532286          | 44241664 | T    | C | 2.7914070927013094e-08 | 5.554040533205699  | 32039.0 |
| 17 | rs4792844          | 44242969 | T    | C | 2.7914070927013094e-08 | 5.554040533205699  | 32039.0 |
| 17 | rs4792843          | 44243179 | A    | G | 2.7914070927013094e-08 | 5.554040533205699  | 32039.0 |
| 17 | rs17585608         | 44243979 | C    | T | 2.7914070927013094e-08 | 5.554040533205699  | 32039.0 |
| 17 | rs17585644         | 44244581 | T    | C | 2.7914070927013094e-08 | 5.554040533205699  | 32039.0 |
| 17 | rs2696657          | 44244926 | T    | G | 2.7914070927013094e-08 | 5.554040533205699  | 32039.0 |
| 17 | rs2696659          | 44245876 | A    | G | 2.7914070927013094e-08 | 5.554040533205699  | 32039.0 |
| 17 | rs1880752          | 43806264 | C    | T | 2.7948792458349235e-08 | 5.553823354455409  | 32180.0 |
| 17 | rs2902662          | 43806925 | G    | A | 2.7948792458349235e-08 | 5.553823354455409  | 32180.0 |
| 17 | rs2864087          | 43807063 | C    | T | 2.7948792458349235e-08 | 5.553823354455409  | 32180.0 |
| 17 | rs79226879         | 43807485 | T    | C | 2.7948792458349235e-08 | 5.553823354455409  | 32180.0 |
| 17 | rs17563599         | 43807955 | A    | C | 2.7948792458349235e-08 | 5.553823354455409  | 32180.0 |
| 17 | rs17649138         | 43808067 | G    | A | 2.7948792458349235e-08 | 5.553823354455409  | 32180.0 |
| 17 | rs62054389         | 43808321 | G    | A | 2.7948792458349235e-08 | 5.553823354455409  | 32180.0 |
| 17 | rs62054390         | 43808443 | A    | C | 2.7948792458349235e-08 | 5.553823354455409  | 32180.0 |
| 17 | rs55947210         | 43808763 | A    | G | 2.7948792458349235e-08 | 5.553823354455409  | 32180.0 |
| 17 | rs62054392         | 43808945 | C    | T | 2.7948792458349235e-08 | 5.553823354455409  | 32180.0 |
| 17 | rs4390635          | 43809016 | C    | T | 2.7948792458349235e-08 | 5.553823354455409  | 32180.0 |
| 17 | rs62054393         | 43809264 | T    | G | 2.7948792458349235e-08 | 5.553823354455409  | 32180.0 |
| 17 | rs75986348         | 43809328 | A    | G | 2.7948792458349235e-08 | 5.553823354455409  | 32180.0 |
| 17 | rs17649162         | 43810371 | G    | C | 2.7948792458349235e-08 | 5.553823354455409  | 32180.0 |
| 17 | rs62054394         | 43810608 | T    | A | 2.7948792458349235e-08 | 5.553823354455409  | 32180.0 |
| 17 | rs113790915        | 43810782 | G    | C | 2.7948792458349235e-08 | 5.553823354455409  | 32180.0 |
| 17 | rs62054395         | 43811060 | T    | G | 2.7948792458349235e-08 | 5.553823354455409  | 32180.0 |
| 17 | rs62054396         | 43811510 | T    | C | 2.7948792458349235e-08 | 5.553823354455409  | 32180.0 |
| 17 | rs17563718         | 43811673 | C    | T | 2.7948792458349235e-08 | 5.553823354455409  | 32180.0 |
| 17 | rs62054397         | 43811792 | C    | T | 2.7948792458349235e-08 | 5.553823354455409  | 32180.0 |
| 17 | rs4569335          | 43811950 | A    | C | 2.7948792458349235e-08 | 5.553823354455409  | 32180.0 |
| 17 | rs1526125          | 43812177 | C    | T | 2.7948792458349235e-08 | 5.553823354455409  | 32180.0 |
| 17 | rs62055895         | 43844044 | A    | G | 2.7988623494998248e-08 | 5.553574538587728  | 32164.0 |
| 17 | rs62055896         | 43844201 | C    | T | 2.7988623494998248e-08 | 5.553574538587728  | 32164.0 |
| 17 | rs55725840         | 43844486 | T    | A | 2.7988623494998248e-08 | 5.553574538587728  | 32164.0 |
| 17 | rs56109643         | 43844859 | A    | G | 2.7988623494998248e-08 | 5.553574538587728  | 32164.0 |

|    |                     |          |       |                      |                        |                    |         |
|----|---------------------|----------|-------|----------------------|------------------------|--------------------|---------|
| 17 | rs112320018         | 44030263 | A     | AC                   | 2.802294804667896e-08  | 5.5533603960016205 | 32146.0 |
| 17 | rs2316772           | 43946423 | A     | C                    | 2.8049304493849017e-08 | 5.553196137168629  | 32125.0 |
| 17 | rs4277389           | 43895653 | A     | G                    | 2.813704101660211e-08  | 5.552650422004256  | 32168.0 |
| 17 | rs2696660           | 44246211 | A     | G                    | 2.8147230750427633e-08 | 5.552587149604854  | 32038.0 |
| 17 | rs2532278           | 44246405 | C     | A                    | 2.8147230750427633e-08 | 5.552587149604854  | 32038.0 |
| 17 | 17:44246624_C_A     | 44246624 | C     | A                    | 2.8147230750427633e-08 | 5.552587149604854  | 32038.0 |
| 17 | rs2532275           | 44246997 | G     | A                    | 2.8147230750427633e-08 | 5.552587149604854  | 32038.0 |
| 17 | rs2532273           | 44247314 | C     | T                    | 2.8147230750427633e-08 | 5.552587149604854  | 32038.0 |
| 17 | rs2532272           | 44247673 | G     | A                    | 2.8147230750427633e-08 | 5.552587149604854  | 32038.0 |
| 17 | rs2316764           | 43895602 | T     | G                    | 2.8155757632764207e-08 | 5.552534219637443  | 32166.0 |
| 17 | rs111355814         | 43977748 | G     | GGCT<br>GGCC<br>GATA | 2.826890429788565e-08  | 5.551833339108727  | 31660.0 |
| 17 | rs79065019          | 44124535 | T     | C                    | 2.829992034462458e-08  | 5.5516416873125145 | 32186.0 |
| 17 | rs35282504          | 43832618 | G     | A                    | 2.8334125833916365e-08 | 5.551430563752907  | 32170.0 |
| 17 | rs76669427          | 43836051 | T     | A                    | 2.8367680598491984e-08 | 5.551223696755415  | 32169.0 |
| 17 | rs62057067          | 43858326 | C     | T                    | 2.837577904524846e-08  | 5.551173804945358  | 32168.0 |
| 17 | rs62057158          | 43907143 | G     | A                    | 2.8379532752253477e-08 | 5.551150684303316  | 32182.0 |
| 17 | rs62057068          | 43858629 | A     | G                    | 2.842421944773628e-08  | 5.5508756680609945 | 32173.0 |
| 17 | rs77692262          | 43917086 | A     | G                    | 2.8435896790239756e-08 | 5.550803871090021  | 32183.0 |
| 17 | rs1881193           | 44248769 | T     | C                    | 2.8523229733062368e-08 | 5.550267818504508  | 32036.0 |
| 17 | rs17688944          | 43779419 | T     | A                    | 2.8553724155116826e-08 | 5.550081017748939  | 32180.0 |
| 17 | rs17571739          | 44032915 | T     | C                    | 2.8617796758346897e-08 | 5.549689155760318  | 32094.0 |
| 17 | 17:43811990_CTTAG_C | 43811990 | CTTAG | C                    | 2.8620984162194948e-08 | 5.5496696841335    | 32171.0 |
| 17 | rs56288604          | 43931380 | A     | G                    | 2.8633139331440204e-08 | 5.549595448362006  | 32157.0 |
| 17 | rs78506181          | 43897480 | A     | G                    | 2.863473382720533e-08  | 5.549585712500298  | 32182.0 |
| 17 | rs62055875          | 43832864 | T     | C                    | 2.8641910135092776e-08 | 5.5495419010570775 | 32169.0 |
| 17 | rs2316769           | 43930798 | A     | G                    | 2.8674824105146826e-08 | 5.549341097237346  | 32167.0 |
| 17 | rs62054442          | 43829353 | A     | G                    | 2.867771831618432e-08  | 5.549323450733422  | 32164.0 |
| 17 | rs2532344           | 44343930 | A     | G                    | 2.8698185560563112e-08 | 5.549198707709687  | 30783.0 |
| 17 | rs62060864          | 44235893 | C     | T                    | 2.8740463228104864e-08 | 5.548941308382294  | 32037.0 |
| 17 | rs1528072           | 44236725 | C     | A                    | 2.8740463228104864e-08 | 5.548941308382294  | 32037.0 |
| 17 | rs2532292           | 44237068 | A     | T                    | 2.8740463228104864e-08 | 5.548941308382294  | 32037.0 |
| 17 | rs2696571           | 44237372 | G     | C                    | 2.8740463228104864e-08 | 5.548941308382294  | 32037.0 |
| 17 | rs2696570           | 44237790 | G     | A                    | 2.8740463228104864e-08 | 5.548941308382294  | 32037.0 |
| 17 | rs76527351          | 44212527 | A     | G                    | 2.8802540815049885e-08 | 5.548564026085875  | 32130.0 |
| 17 | rs17689116          | 43782558 | T     | C                    | 2.8855912127436797e-08 | 5.548240287197462  | 32170.0 |
| 17 | rs2903705           | 43573231 | C     | G                    | 2.8857016691709816e-08 | 5.548233593286502  | 32136.0 |
| 17 | 17:44270809_A_G     | 44270809 | A     | G                    | 2.8864247590265453e-08 | 5.548189778534773  | 32030.0 |
| 17 | rs62065452          | 43573061 | T     | C                    | 2.8881830094765843e-08 | 5.548083283899564  | 31991.0 |
| 17 | rs56302057          | 44034486 | A     | G                    | 2.890334525218248e-08  | 5.547953055313376  | 32129.0 |
| 17 | rs112954158         | 43671066 | G     | GA                   | 2.8906764993926668e-08 | 5.547932364703136  | 31900.0 |
| 17 | rs58879558          | 44095467 | T     | C                    | 2.8956395831721048e-08 | 5.547632348167942  | 32165.0 |
| 17 | rs62061798          | 44173812 | G     | A                    | 2.8966876284587245e-08 | 5.547569058033651  | 32113.0 |
| 17 | rs62057152          | 43904110 | G     | C                    | 2.9020142110379302e-08 | 5.547247735439372  | 32184.0 |
| 17 | rs17689824          | 43904397 | C     | T                    | 2.9020142110379302e-08 | 5.547247735439372  | 32184.0 |
| 17 | rs62057153          | 43904528 | T     | C                    | 2.9020142110379302e-08 | 5.547247735439372  | 32184.0 |
| 17 | rs62057154          | 43904610 | C     | T                    | 2.9020142110379302e-08 | 5.547247735439372  | 32184.0 |
| 17 | rs62057155          | 43904673 | C     | T                    | 2.9020142110379302e-08 | 5.547247735439372  | 32184.0 |
| 17 | rs62057156          | 43904948 | G     | C                    | 2.9020142110379302e-08 | 5.547247735439372  | 32184.0 |
| 17 | rs78872653          | 43905134 | G     | A                    | 2.9020142110379302e-08 | 5.547247735439372  | 32184.0 |
| 17 | rs62057157          | 43905313 | G     | C                    | 2.9020142110379302e-08 | 5.547247735439372  | 32184.0 |
| 17 | rs17763086          | 43905481 | T     | G                    | 2.9020142110379302e-08 | 5.547247735439372  | 32184.0 |
| 17 | rs62055871          | 43831112 | G     | A                    | 2.9047922733010406e-08 | 5.547080377637774  | 32177.0 |
| 17 | rs56201245          | 44034340 | C     | T                    | 2.9052976554661964e-08 | 5.547049948778516  | 32130.0 |
| 17 | rs56369036          | 43841571 | T     | A                    | 2.9058435649910683e-08 | 5.547017085552438  | 32161.0 |



|    |                            |          |               |     |                        |                    |         |
|----|----------------------------|----------|---------------|-----|------------------------|--------------------|---------|
| 17 | 17:43775212_CCTT_C         | 43775212 | CCTT          | C   | 2.9064603614845525e-08 | 5.546979962205985  | 32115.0 |
| 17 | rs2668653                  | 44288156 | T             | C   | 2.9097386121135187e-08 | 5.546782781174061  | 31923.0 |
| 17 | rs2458210                  | 44298102 | G             | A   | 2.9146120817988486e-08 | 5.546490048538688  | 32090.0 |
| 17 | rs117646503                | 43893260 | T             | C   | 2.9180820748682804e-08 | 5.546281907246488  | 32182.0 |
| 17 | rs17762769                 | 43893403 | G             | A   | 2.9180820748682804e-08 | 5.546281907246488  | 32182.0 |
| 17 | rs28364025                 | 43894102 | T             | C   | 2.9180820748682804e-08 | 5.546281907246488  | 32182.0 |
| 17 | rs28364023                 | 43894159 | C             | T   | 2.9180820748682804e-08 | 5.546281907246488  | 32182.0 |
| 17 | rs55779147                 | 43894510 | G             | A   | 2.9180820748682804e-08 | 5.546281907246488  | 32182.0 |
| 17 | rs17688922                 | 43779351 | G             | A   | 2.9185592615749843e-08 | 5.5462533028447165 | 32155.0 |
| 17 | rs112460810                | 43900215 | T             | TAA | 2.9338288559312564e-08 | 5.545340372403554  | 32180.0 |
| 17 | 17:44094133_CA_C           | 44094133 | CA            | C   | 2.9348496079512536e-08 | 5.545279508719148  | 32061.0 |
| 17 | rs750783539                | 44137009 | AAAAAAGAG     | A   | 2.937873074165259e-08  | 5.545099351000823  | 32164.0 |
| 17 | 17:43796396_TG_T           | 43796396 | TG            | T   | 2.9405517968571584e-08 | 5.544939885562178  | 32177.0 |
| 17 | rs62056875                 | 43778003 | T             | A   | 2.9443388031965017e-08 | 5.544714683859642  | 32181.0 |
| 17 | rs17762165                 | 43778602 | C             | T   | 2.9443388031965017e-08 | 5.544714683859642  | 32181.0 |
| 17 | rs62063282                 | 44039043 | G             | A   | 2.9500795814255632e-08 | 5.544373832652044  | 32134.0 |
| 17 | 17:44102741_TCA_T          | 44102741 | TCA           | T   | 2.9531903242561263e-08 | 5.544189405097115  | 32130.0 |
| 17 | rs4792845                  | 44242788 | C             | T   | 2.953858063963084e-08  | 5.544149841182759  | 32033.0 |
| 17 | rs78440279                 | 43816052 | C             | T   | 2.954844534789572e-08  | 5.544091408164735  | 32173.0 |
| 17 | rs17688682                 | 43775929 | C             | G   | 2.9549678663409538e-08 | 5.544084104024076  | 32180.0 |
| 17 | rs12150454                 | 43776061 | C             | T   | 2.957805884768067e-08  | 5.5439161079665435 | 32178.0 |
| 17 | rs4401083                  | 43806015 | G             | A   | 2.9599464461553525e-08 | 5.543789501200519  | 32178.0 |
| 17 | rs62055878                 | 43835854 | C             | A   | 2.9608937170911635e-08 | 5.5437335017684655 | 32173.0 |
| 17 | rs62057143                 | 43901528 | T             | C   | 2.9619030933488715e-08 | 5.543673850006902  | 32186.0 |
| 17 | rs62057146                 | 43903106 | A             | G   | 2.9630673845602518e-08 | 5.543605067626999  | 32181.0 |
| 17 | 17:43777835_TATCCTGCTTCC_T | 43777835 | TATCCTGCTTCCC | T   | 2.966831213164293e-08  | 5.543382892647902  | 32117.0 |
| 17 | rs739644                   | 43895008 | C             | G   | 2.9678632164847268e-08 | 5.543322022309524  | 32183.0 |
| 17 | rs12150390                 | 43896228 | T             | C   | 2.9678632164847268e-08 | 5.543322022309524  | 32183.0 |
| 17 | rs62057112                 | 43897202 | T             | A   | 2.9678632164847268e-08 | 5.543322022309524  | 32183.0 |
| 17 | rs78587102                 | 43897246 | A             | G   | 2.9678632164847268e-08 | 5.543322022309524  | 32183.0 |
| 17 | rs79959255                 | 44077708 | G             | T   | 2.970878679982161e-08  | 5.543144279737182  | 32177.0 |
| 17 | rs62054380                 | 43800987 | C             | A   | 2.9758938773474378e-08 | 5.542849052729998  | 32177.0 |
| 17 | rs17563501                 | 43801695 | C             | T   | 2.9758938773474378e-08 | 5.542849052729998  | 32177.0 |
| 17 | rs62063271                 | 44036047 | G             | A   | 2.9783683345720328e-08 | 5.542703567940234  | 32130.0 |
| 17 | rs62054811                 | 43918651 | C             | G   | 2.9791245330351006e-08 | 5.542659130927782  | 32181.0 |
| 17 | rs17650901                 | 44039691 | A             | G   | 2.9824208534493324e-08 | 5.542465554710308  | 32157.0 |
| 17 | rs62056881                 | 43782455 | G             | T   | 2.988868315964689e-08  | 5.542087527195354  | 32170.0 |
| 17 | rs62057144                 | 43901558 | A             | G   | 2.9914053545363036e-08 | 5.541938992461254  | 32186.0 |
| 17 | rs2696671                  | 44316888 | A             | G   | 2.9937154771922944e-08 | 5.541803849132683  | 32186.0 |
| 17 | rs41280118                 | 43903089 | C             | T   | 3.004017785172413e-08  | 5.541202388074288  | 32184.0 |
| 17 | rs62057148                 | 43903485 | G             | C   | 3.004017785172413e-08  | 5.541202388074288  | 32184.0 |
| 17 | rs62057149                 | 43903546 | A             | G   | 3.004017785172413e-08  | 5.541202388074288  | 32184.0 |
| 17 | rs62057150                 | 43903548 | C             | T   | 3.004017785172413e-08  | 5.541202388074288  | 32184.0 |
| 17 | rs17690679                 | 43924803 | A             | G   | 3.0080731249699966e-08 | 5.540966181243062  | 32183.0 |
| 17 | rs1876831                  | 43907745 | C             | T   | 3.030663213519985e-08  | 5.539656029052926  | 32183.0 |
| 17 | rs16940665                 | 43907896 | T             | C   | 3.030663213519985e-08  | 5.539656029052926  | 32183.0 |
| 17 | rs55763795                 | 43908773 | G             | C   | 3.030663213519985e-08  | 5.539656029052926  | 32183.0 |
| 17 | rs55865707                 | 43908826 | T             | G   | 3.030663213519985e-08  | 5.539656029052926  | 32183.0 |
| 17 | rs62062806                 | 44031420 | G             | A   | 3.0310530619863484e-08 | 5.539633502363817  | 32153.0 |
| 17 | rs55978005                 | 44031540 | G             | T   | 3.0310530619863484e-08 | 5.539633502363817  | 32153.0 |
| 17 | rs17571857                 | 44035706 | A             | G   | 3.034310743012957e-08  | 5.539445372961671  | 32131.0 |
| 17 | rs56280222                 | 43803788 | T             | C   | 3.040403043909232e-08  | 5.539094071019646  | 32184.0 |
| 17 | rs62054820                 | 43926755 | A             | G   | 3.043533033969961e-08  | 5.538913851057498  | 32173.0 |
| 17 | rs112570965                | 43801092 | T             | C   | 3.050300775687821e-08  | 5.538524788941274  | 32179.0 |

|    |                  |          |    |   |                        |                    |         |
|----|------------------|----------|----|---|------------------------|--------------------|---------|
| 17 | rs17649019       | 43801593 | G  | A | 3.050300775687821e-08  | 5.538524788941274  | 32179.0 |
| 17 | rs62054763       | 43910262 | C  | G | 3.052146188077649e-08  | 5.5384188456800425 | 32182.0 |
| 17 | rs16940674       | 43910507 | C  | T | 3.052146188077649e-08  | 5.5384188456800425 | 32182.0 |
| 17 | rs1876830        | 43911352 | C  | T | 3.052146188077649e-08  | 5.5384188456800425 | 32182.0 |
| 17 | rs1876829        | 43911443 | T  | C | 3.052146188077649e-08  | 5.5384188456800425 | 32182.0 |
| 17 | rs1876828        | 43911525 | C  | T | 3.052146188077649e-08  | 5.5384188456800425 | 32182.0 |
| 17 | rs1876827        | 43911832 | T  | C | 3.052146188077649e-08  | 5.5384188456800425 | 32182.0 |
| 17 | rs28364021       | 43912282 | C  | T | 3.052146188077649e-08  | 5.5384188456800425 | 32182.0 |
| 17 | rs17763199       | 43910183 | G  | A | 3.0536742532620314e-08 | 5.5383311680243095 | 32175.0 |
| 17 | rs4335809        | 43902216 | C  | T | 3.055564147739159e-08  | 5.5382227881065464 | 32185.0 |
| 17 | rs4341787        | 43902505 | C  | T | 3.055564147739159e-08  | 5.5382227881065464 | 32185.0 |
| 17 | rs4523962        | 43902522 | G  | A | 3.055564147739159e-08  | 5.5382227881065464 | 32185.0 |
| 17 | rs3885074        | 43902738 | C  | A | 3.055564147739159e-08  | 5.5382227881065464 | 32185.0 |
| 17 | rs3885075        | 43902799 | A  | G | 3.055564147739159e-08  | 5.5382227881065464 | 32185.0 |
| 17 | rs41280116       | 43902842 | C  | T | 3.055564147739159e-08  | 5.5382227881065464 | 32185.0 |
| 17 | rs34283254       | 43902861 | C  | A | 3.055564147739159e-08  | 5.5382227881065464 | 32185.0 |
| 17 | rs1396862        | 43902997 | G  | A | 3.055564147739159e-08  | 5.5382227881065464 | 32185.0 |
| 17 | rs80190331       | 44035233 | A  | T | 3.0602300802622316e-08 | 5.537955488763862  | 32135.0 |
| 17 | rs62054435       | 43825339 | C  | G | 3.066661136535968e-08  | 5.5375877173152395 | 32178.0 |
| 17 | 17:43855501_AC_A | 43855501 | AC | A | 3.067311366456745e-08  | 5.537550574414557  | 32096.0 |
| 17 | rs62054440       | 43827391 | G  | C | 3.068729549323072e-08  | 5.537469590445952  | 32166.0 |
| 17 | rs12150451       | 43827431 | A  | G | 3.068729549323072e-08  | 5.537469590445952  | 32166.0 |
| 17 | rs62073112       | 44324572 | A  | G | 3.069700255167919e-08  | 5.537414180151142  | 31843.0 |
| 17 | rs12150048       | 43827471 | G  | C | 3.0739706633931027e-08 | 5.5371706163824275 | 32165.0 |
| 17 | rs56026128       | 43931244 | G  | C | 3.0760011461312155e-08 | 5.537054922431726  | 32141.0 |
| 17 | rs62055933       | 43848461 | G  | A | 3.076022526622324e-08  | 5.537053704596691  | 32122.0 |
| 17 | rs62055883       | 43837446 | C  | G | 3.0785036520777606e-08 | 5.536912435170517  | 32154.0 |
| 17 | rs62054815       | 43923266 | G  | A | 3.0796165172341164e-08 | 5.536849107134931  | 32186.0 |
| 17 | rs17762308       | 43780948 | T  | C | 3.080772602152142e-08  | 5.536783343168619  | 32158.0 |
| 17 | rs16940681       | 43912159 | G  | C | 3.0820576397410083e-08 | 5.5367102718116685 | 32170.0 |
| 17 | rs2907480        | 44327712 | C  | T | 3.083761123624525e-08  | 5.536613451804422  | 31636.0 |
| 17 | rs4340365        | 43930980 | C  | T | 3.0898003771258036e-08 | 5.536270619519828  | 32147.0 |
| 17 | rs55638417       | 43900434 | A  | G | 3.093141415698994e-08  | 5.5360812368822145 | 32175.0 |
| 17 | rs55746658       | 44034575 | T  | C | 3.095001467656803e-08  | 5.535975888117147  | 32131.0 |
| 17 | rs62063275       | 44036287 | A  | G | 3.098864842187824e-08  | 5.5357572722282775 | 32136.0 |
| 17 | rs1034927        | 44334419 | C  | T | 3.112007583139072e-08  | 5.535015541607523  | 32186.0 |
| 17 | rs17662115       | 44227531 | T  | C | 3.115956714970728e-08  | 5.534793260027852  | 31968.0 |
| 17 | rs17426174       | 43830938 | G  | C | 3.1185235748722455e-08 | 5.5346489277712525 | 32177.0 |
| 17 | rs62054839       | 43936804 | A  | G | 3.11929295304855e-08   | 5.534605688767506  | 32077.0 |
| 17 | rs62055550       | 43965680 | G  | A | 3.124868367697357e-08  | 5.534292659626446  | 32170.0 |
| 17 | rs62055551       | 43965687 | C  | G | 3.124868367697357e-08  | 5.534292659626446  | 32170.0 |
| 17 | rs368673667      | 43708418 | C  | G | 3.126410378125077e-08  | 5.534206179794     | 32156.0 |
| 17 | rs16940668       | 43907966 | G  | A | 3.1270838841138594e-08 | 5.534168420862933  | 32180.0 |
| 17 | 17:43814370_AC_A | 43814370 | AC | A | 3.1281270126084984e-08 | 5.5341099552641975 | 32168.0 |
| 17 | rs12150608       | 43775402 | T  | C | 3.1318350493474866e-08 | 5.53390227904208   | 32178.0 |
| 17 | rs17690987       | 43931626 | T  | C | 3.136342677908584e-08  | 5.533650141036731  | 32157.0 |
| 17 | rs62054426       | 43820741 | A  | T | 3.136800328595502e-08  | 5.533624561620443  | 32179.0 |
| 17 | rs62054427       | 43821062 | A  | G | 3.136800328595502e-08  | 5.533624561620443  | 32179.0 |
| 17 | rs74464991       | 43821685 | C  | A | 3.136800328595502e-08  | 5.533624561620443  | 32179.0 |
| 17 | rs2004260        | 43822398 | T  | C | 3.136800328595502e-08  | 5.533624561620443  | 32179.0 |
| 17 | rs75643244       | 43823326 | A  | G | 3.136800328595502e-08  | 5.533624561620443  | 32179.0 |
| 17 | rs62054431       | 43823880 | C  | T | 3.136800328595502e-08  | 5.533624561620443  | 32179.0 |
| 17 | rs62054432       | 43823889 | C  | A | 3.136800328595502e-08  | 5.533624561620443  | 32179.0 |
| 17 | rs111497072      | 43824201 | G  | A | 3.136800328595502e-08  | 5.533624561620443  | 32179.0 |

|    |                     |          |       |   |                        |                    |         |
|----|---------------------|----------|-------|---|------------------------|--------------------|---------|
| 17 | rs62054433          | 43824348 | T     | C | 3.136800328595502e-08  | 5.533624561620443  | 32179.0 |
| 17 | rs62054434          | 43824382 | T     | G | 3.136800328595502e-08  | 5.533624561620443  | 32179.0 |
| 17 | rs12150683          | 43824848 | A     | G | 3.136800328595502e-08  | 5.533624561620443  | 32179.0 |
| 17 | rs12150332          | 43824908 | C     | T | 3.136800328595502e-08  | 5.533624561620443  | 32179.0 |
| 17 | rs75715199          | 43825478 | G     | A | 3.136800328595502e-08  | 5.533624561620443  | 32179.0 |
| 17 | rs62054438          | 43825711 | A     | C | 3.136800328595502e-08  | 5.533624561620443  | 32179.0 |
| 17 | rs62054439          | 43825725 | G     | T | 3.136800328595502e-08  | 5.533624561620443  | 32179.0 |
| 17 | rs17334797          | 43825912 | A     | G | 3.136800328595502e-08  | 5.533624561620443  | 32179.0 |
| 17 | rs12150363          | 43826351 | A     | G | 3.136800328595502e-08  | 5.533624561620443  | 32179.0 |
| 17 | rs12150672          | 43826637 | G     | A | 3.136800328595502e-08  | 5.533624561620443  | 32179.0 |
| 17 | rs17334894          | 43827209 | G     | A | 3.136800328595502e-08  | 5.533624561620443  | 32179.0 |
| 17 | rs12150604          | 43828221 | T     | A | 3.136800328595502e-08  | 5.533624561620443  | 32179.0 |
| 17 | rs17334944          | 43828617 | G     | A | 3.136800328595502e-08  | 5.533624561620443  | 32179.0 |
| 17 | rs17426064          | 43828698 | C     | T | 3.136800328595502e-08  | 5.533624561620443  | 32179.0 |
| 17 | rs17426106          | 43828935 | G     | C | 3.136800328595502e-08  | 5.533624561620443  | 32179.0 |
| 17 | 17:43928629_GCACA_G | 43928629 | GCACA | G | 3.140409342597686e-08  | 5.533422970180063  | 32084.0 |
| 17 | rs12150547          | 43775546 | A     | G | 3.145387941932075e-08  | 5.5331452453247865 | 32181.0 |
| 17 | rs4566212           | 43895751 | G     | A | 3.148525367313643e-08  | 5.5329704469901655 | 32176.0 |
| 17 | rs55645418          | 43832115 | A     | G | 3.1530784388935636e-08 | 5.532717077733919  | 32178.0 |
| 17 | rs7350923           | 43834970 | C     | T | 3.158504562753334e-08  | 5.532415588010599  | 32176.0 |
| 17 | rs11079717          | 43835351 | T     | C | 3.158504562753334e-08  | 5.532415588010599  | 32176.0 |
| 17 | rs757501            | 43756685 | A     | G | 3.160984986014779e-08  | 5.532277936469312  | 32178.0 |
| 17 | rs62057118          | 43899727 | A     | G | 3.164214588107248e-08  | 5.532098866066528  | 32162.0 |
| 17 | rs1912151           | 43902944 | C     | T | 3.166655409573922e-08  | 5.531963648453353  | 32185.0 |
| 17 | rs413917            | 43723189 | G     | A | 3.1694943579553196e-08 | 5.531806502376847  | 32186.0 |
| 17 | rs17761985          | 43776787 | C     | T | 3.1699347282376545e-08 | 5.5317821385205805 | 32181.0 |
| 17 | rs56380663          | 43804619 | C     | T | 3.17041920479587e-08   | 5.531755338240398  | 32186.0 |
| 17 | rs62054429          | 43823125 | G     | A | 3.172732478973945e-08  | 5.531627427259713  | 32178.0 |
| 17 | rs28439278          | 43838071 | C     | T | 3.1733606530115284e-08 | 5.531592708407307  | 32159.0 |
| 17 | rs17688767          | 43777542 | A     | G | 3.1756980893607535e-08 | 5.531463578049686  | 32182.0 |
| 17 | rs62056874          | 43777578 | C     | T | 3.1756980893607535e-08 | 5.531463578049686  | 32182.0 |
| 17 | rs17688773          | 43777710 | T     | C | 3.1756980893607535e-08 | 5.531463578049686  | 32182.0 |
| 17 | rs12150091          | 43776242 | A     | G | 3.1787326549620783e-08 | 5.5312960726607    | 32180.0 |
| 17 | rs12150464          | 43776371 | C     | T | 3.1787326549620783e-08 | 5.5312960726607    | 32180.0 |
| 17 | rs12150435          | 43776391 | G     | C | 3.1787326549620783e-08 | 5.5312960726607    | 32180.0 |
| 17 | rs11079725          | 43923934 | T     | C | 3.182189999875133e-08  | 5.5311054191659235 | 32186.0 |
| 17 | rs12373139          | 43924130 | G     | A | 3.182189999875133e-08  | 5.5311054191659235 | 32186.0 |
| 17 | rs112916880         | 44036129 | C     | T | 3.184489570237336e-08  | 5.53097872179116   | 32135.0 |
| 17 | rs36047693          | 43833824 | G     | C | 3.184854555517685e-08  | 5.5309586206829655 | 32177.0 |
| 17 | rs34195569          | 43833921 | G     | A | 3.184854555517685e-08  | 5.5309586206829655 | 32177.0 |
| 17 | rs34211253          | 43834074 | C     | G | 3.184854555517685e-08  | 5.5309586206829655 | 32177.0 |
| 17 | rs34008514          | 43834314 | A     | G | 3.184854555517685e-08  | 5.5309586206829655 | 32177.0 |
| 17 | rs12943085          | 43834482 | G     | A | 3.184854555517685e-08  | 5.5309586206829655 | 32177.0 |
| 17 | rs188710438         | 43573649 | C     | T | 3.1865804956464104e-08 | 5.530863596956962  | 32111.0 |
| 17 | rs77849344          | 43840864 | G     | A | 3.190245622421044e-08  | 5.530661974432441  | 32156.0 |
| 17 | rs17762073          | 43777745 | C     | A | 3.1929722289630223e-08 | 5.530512126614388  | 32181.0 |
| 17 | rs2668716           | 44343371 | G     | A | 3.1967111652889e-08    | 5.530306845250906  | 31286.0 |
| 17 | rs17650771          | 44035367 | A     | G | 3.1981768434872526e-08 | 5.5302264376659584 | 32133.0 |
| 17 | rs12373123          | 43924073 | T     | C | 3.1998542980034895e-08 | 5.530134455819222  | 32186.0 |
| 17 | rs41457044          | 43911424 | C     | T | 3.200298801233503e-08  | 5.530110089687952  | 32181.0 |
| 17 | rs62054824          | 43929992 | C     | T | 3.2013325051264305e-08 | 5.530053438304592  | 32163.0 |
| 17 | rs62054424          | 43819384 | G     | A | 3.205737746719399e-08  | 5.529812211053032  | 32179.0 |
| 17 | rs17563923          | 43819450 | G     | A | 3.205737746719399e-08  | 5.529812211053032  | 32179.0 |
| 17 | rs62054425          | 43819480 | C     | T | 3.205737746719399e-08  | 5.529812211053032  | 32179.0 |

|    |                       |          |         |              |                        |                    |         |
|----|-----------------------|----------|---------|--------------|------------------------|--------------------|---------|
| 17 | rs17690661            | 43924521 | G       | A            | 3.205982656449533e-08  | 5.529798809443776  | 32183.0 |
| 17 | rs55943825            | 43924776 | C       | T            | 3.205982656449533e-08  | 5.529798809443776  | 32183.0 |
| 17 | rs62056870            | 43773784 | C       | A            | 3.208053989774584e-08  | 5.529685504528321  | 32182.0 |
| 17 | rs62054381            | 43801185 | A       | G            | 3.210148928028927e-08  | 5.529570980551921  | 32178.0 |
| 17 | rs12948216            | 43836673 | C       | T            | 3.2149344196696114e-08 | 5.529309643841941  | 32167.0 |
| 17 | rs62055692            | 43754909 | A       | G            | 3.21583875823211e-08   | 5.529260300119018  | 32177.0 |
| 17 | rs62054831            | 43932381 | C       | T            | 3.2207555709221176e-08 | 5.5289922577673245 | 32147.0 |
| 17 | rs2696626             | 44327070 | G       | A            | 3.221270026443182e-08  | 5.528964234926182  | 31104.0 |
| 17 | rs968027              | 43781250 | C       | T            | 3.226553441521052e-08  | 5.5286766936748775 | 32128.0 |
| 17 | rs17563433            | 43800351 | A       | C            | 3.2320361043739246e-08 | 5.528378791195427  | 32178.0 |
| 17 | rs77370070            | 43800404 | T       | G            | 3.2320361043739246e-08 | 5.528378791195427  | 32178.0 |
| 17 | rs17687740            | 43756376 | G       | C            | 3.235617647888565e-08  | 5.528184451324166  | 32174.0 |
| 17 | rs62063264            | 44033401 | C       | T            | 3.2405753402895314e-08 | 5.527915783640228  | 32024.0 |
| 17 | rs62055869            | 43830685 | G       | A            | 3.2407891041817087e-08 | 5.527904208297964  | 32178.0 |
| 17 | rs17688410            | 43772251 | C       | T            | 3.241036637528847e-08  | 5.5278908052607365 | 32183.0 |
| 17 | rs4479290             | 44021744 | T       | C            | 3.2434229084855484e-08 | 5.5277616482060665 | 32041.0 |
| 17 | rs62057122            | 43901001 | C       | T            | 3.244076056065516e-08  | 5.527726312623166  | 32168.0 |
| 17 | rs56205560            | 43804389 | T       | A            | 3.247591751529355e-08  | 5.527536230360159  | 32184.0 |
| 17 | rs2532230             | 44275619 | A       | G            | 3.2489674936846025e-08 | 5.527461902772695  | 31899.0 |
| 17 | rs55989971            | 43798160 | G       | A            | 3.251675538544118e-08  | 5.527315683667462  | 32178.0 |
| 17 | rs55938136            | 43798360 | A       | G            | 3.251675538544118e-08  | 5.527315683667462  | 32178.0 |
| 17 | 17:43908476_GT_G      | 43908476 | GT      | GAGA         | 3.2520367782570045e-08 | 5.527296187696557  | 32180.0 |
| 17 | rs201825478           | 43774408 | A       | AAGA<br>AAGA | 3.253764499177018e-08  | 5.527202972292327  | 32177.0 |
| 17 | rs9906974             | 43822772 | T       | C            | 3.261567362456833e-08  | 5.526782583068363  | 31556.0 |
| 17 | rs112556326           | 43575946 | G       | T            | 3.2631188067848216e-08 | 5.526699113309064  | 32108.0 |
| 17 | rs1724397             | 43665809 | C       | T            | 3.2657363834575606e-08 | 5.526558371446995  | 32025.0 |
| 17 | rs1724398             | 43665838 | A       | G            | 3.2657363834575606e-08 | 5.526558371446995  | 32025.0 |
| 17 | rs56046792            | 43797246 | C       | T            | 3.270126285686974e-08  | 5.526322580653758  | 32177.0 |
| 17 | rs56323722            | 43798015 | A       | C            | 3.270126285686974e-08  | 5.526322580653758  | 32177.0 |
| 17 | 17:44327642_AC_A      | 44327642 | AC      | A            | 3.271920207256715e-08  | 5.526226313752642  | 32105.0 |
| 17 | rs62055868            | 43830640 | C       | T            | 3.275761075372185e-08  | 5.526020373960684  | 32177.0 |
| 17 | rs75403953            | 43798546 | A       | G            | 3.2784682422357345e-08 | 5.525875361680325  | 32179.0 |
| 17 | rs16940676            | 43911036 | G       | A            | 3.281109271106217e-08  | 5.525734004041506  | 32182.0 |
| 17 | rs62056873            | 43776945 | T       | C            | 3.2830458310880055e-08 | 5.525630422304684  | 32181.0 |
| 17 | rs17573447            | 44079567 | C       | T            | 3.285770300749895e-08  | 5.525484797555556  | 32166.0 |
| 17 | 17:44184819_CAAAGGT_C | 44184819 | CAAAGGT | C            | 3.286363365760183e-08  | 5.525453113352868  | 31707.0 |
| 17 | rs80072429            | 43818611 | G       | A            | 3.2907461710856224e-08 | 5.525219135966747  | 32182.0 |
| 17 | rs77114624            | 43818657 | T       | C            | 3.2907461710856224e-08 | 5.525219135966747  | 32182.0 |
| 17 | rs76311426            | 43818690 | G       | T            | 3.2907461710856224e-08 | 5.525219135966747  | 32182.0 |
| 17 | rs17563861            | 43818906 | A       | G            | 3.2907461710856224e-08 | 5.525219135966747  | 32182.0 |
| 17 | rs17563889            | 43818946 | A       | T            | 3.2907461710856224e-08 | 5.525219135966747  | 32182.0 |
| 17 | rs62054825            | 43930033 | G       | A            | 3.2910088645755264e-08 | 5.525205121599192  | 32164.0 |
| 17 | rs56385754            | 43927255 | G       | T            | 3.2914543483234385e-08 | 5.525181358081311  | 32170.0 |
| 17 | rs62063263            | 44033394 | G       | C            | 3.291968441453706e-08  | 5.525153938598417  | 32020.0 |
| 17 | rs113927637           | 43807911 | A       | G            | 3.293236874253001e-08  | 5.5250863036944455 | 32174.0 |
| 17 | rs62066460            | 43574935 | C       | T            | 3.2948831223202825e-08 | 5.5249985607356775 | 32109.0 |
| 17 | rs62054804            | 43914809 | C       | T            | 3.2956607975052136e-08 | 5.524957126411263  | 32183.0 |
| 17 | rs377660109           | 44263022 | C       | CAT          | 3.2959925078014505e-08 | 5.5249394558613965 | 32010.0 |
| 17 | rs1052553             | 44073889 | A       | G            | 3.2962670514064715e-08 | 5.5249248319448725 | 32164.0 |
| 17 | rs2907478             | 44331297 | G       | T            | 3.306544203108806e-08  | 5.524378254500624  | 32123.0 |
| 17 | rs79322350            | 43790401 | A       | G            | 3.325161480797955e-08  | 5.523392301160449  | 32172.0 |
| 17 | rs4479289             | 43793951 | G       | A            | 3.3306233598385544e-08 | 5.523104061036136  | 32175.0 |
| 17 | rs4609898             | 43794182 | G       | A            | 3.3306233598385544e-08 | 5.523104061036136  | 32175.0 |
| 17 | rs4605208             | 43794209 | G       | C            | 3.3306233598385544e-08 | 5.523104061036136  | 32175.0 |

|    |                  |          |    |    |                        |                    |         |
|----|------------------|----------|----|----|------------------------|--------------------|---------|
| 17 | rs75310534       | 43794286 | C  | T  | 3.3306233598385544e-08 | 5.523104061036136  | 32175.0 |
| 17 | rs113856644      | 43932277 | G  | A  | 3.338236114446653e-08  | 5.5227030765720215 | 32160.0 |
| 17 | rs17563683       | 43811072 | A  | G  | 3.339104911279691e-08  | 5.5226573710858835 | 32179.0 |
| 17 | rs79882507       | 43837782 | A  | G  | 3.3464928294926025e-08 | 5.522269174454172  | 32158.0 |
| 17 | rs4564621        | 43895501 | G  | C  | 3.3480373817520515e-08 | 5.522188121348282  | 32177.0 |
| 17 | rs2316763        | 43895530 | C  | T  | 3.348873821734327e-08  | 5.522144242822124  | 32175.0 |
| 17 | rs4566211        | 43895696 | G  | A  | 3.348873821734327e-08  | 5.522144242822124  | 32175.0 |
| 17 | rs56226437       | 44042361 | T  | C  | 3.3512797273595925e-08 | 5.5220180914605415 | 32064.0 |
| 17 | rs55907036       | 44042366 | G  | A  | 3.3512797273595925e-08 | 5.5220180914605415 | 32064.0 |
| 17 | rs76007856       | 43795238 | G  | A  | 3.354909220221227e-08  | 5.521827948598748  | 32176.0 |
| 17 | rs111415173      | 43795573 | C  | T  | 3.354909220221227e-08  | 5.521827948598748  | 32176.0 |
| 17 | rs113991678      | 43795634 | C  | T  | 3.354909220221227e-08  | 5.521827948598748  | 32176.0 |
| 17 | rs112995313      | 43795768 | T  | C  | 3.354909220221227e-08  | 5.521827948598748  | 32176.0 |
| 17 | rs1880750        | 43796541 | T  | A  | 3.354909220221227e-08  | 5.521827948598748  | 32176.0 |
| 17 | rs113155081      | 43752078 | A  | AC | 3.3603956552632214e-08 | 5.521540902185014  | 32142.0 |
| 17 | rs189777036      | 43574229 | T  | C  | 3.3608853181987685e-08 | 5.521515305466088  | 32110.0 |
| 17 | rs62063857       | 44076665 | A  | G  | 3.362751341341905e-08  | 5.521417793820744  | 32186.0 |
| 17 | rs12150141       | 43775145 | G  | A  | 3.363521371588008e-08  | 5.521377570112356  | 32180.0 |
| 17 | rs62057117       | 43899657 | C  | G  | 3.3677946758356666e-08 | 5.521154509726183  | 32165.0 |
| 17 | rs418891         | 43693538 | G  | T  | 3.369080041555169e-08  | 5.52108746917642   | 32171.0 |
| 17 | rs55973918       | 43792252 | C  | A  | 3.3701437528500406e-08 | 5.521032008168292  | 32175.0 |
| 17 | rs1568949        | 43792975 | G  | A  | 3.3701437528500406e-08 | 5.521032008168292  | 32175.0 |
| 17 | rs1105571        | 43793200 | A  | T  | 3.3701437528500406e-08 | 5.521032008168292  | 32175.0 |
| 17 | rs1105570        | 43793342 | A  | G  | 3.3701437528500406e-08 | 5.521032008168292  | 32175.0 |
| 17 | rs1105569        | 43793388 | C  | T  | 3.3701437528500406e-08 | 5.521032008168292  | 32175.0 |
| 17 | rs7502937        | 43793665 | A  | G  | 3.3701437528500406e-08 | 5.521032008168292  | 32175.0 |
| 17 | rs78917479       | 43899611 | C  | T  | 3.373699636252597e-08  | 5.5208467305881275 | 32169.0 |
| 17 | rs62057116       | 43899655 | T  | C  | 3.373699636252597e-08  | 5.5208467305881275 | 32169.0 |
| 17 | rs62057101       | 43885291 | G  | A  | 3.375853667036053e-08  | 5.52073458796366   | 32174.0 |
| 17 | rs2942164        | 43721283 | G  | C  | 3.3783137183402664e-08 | 5.520606598240686  | 32186.0 |
| 17 | rs62056866       | 43771493 | G  | A  | 3.3796499102382603e-08 | 5.520537117722296  | 32183.0 |
| 17 | rs62056867       | 43771627 | A  | G  | 3.3796499102382603e-08 | 5.520537117722296  | 32183.0 |
| 17 | rs56200760       | 43772018 | G  | T  | 3.3796499102382603e-08 | 5.520537117722296  | 32183.0 |
| 17 | rs17688391       | 43772109 | C  | A  | 3.3796499102382603e-08 | 5.520537117722296  | 32183.0 |
| 17 | rs55927630       | 43772407 | C  | T  | 3.3796499102382603e-08 | 5.520537117722296  | 32183.0 |
| 17 | rs17688434       | 43772540 | G  | A  | 3.3796499102382603e-08 | 5.520537117722296  | 32183.0 |
| 17 | rs17688452       | 43773085 | G  | A  | 3.3796499102382603e-08 | 5.520537117722296  | 32183.0 |
| 17 | rs10491144       | 43773124 | A  | C  | 3.3796499102382603e-08 | 5.520537117722296  | 32183.0 |
| 17 | rs10491143       | 43773248 | A  | T  | 3.3796499102382603e-08 | 5.520537117722296  | 32183.0 |
| 17 | rs62056869       | 43773447 | T  | C  | 3.3796499102382603e-08 | 5.520537117722296  | 32183.0 |
| 17 | rs17688511       | 43773607 | T  | G  | 3.3796499102382603e-08 | 5.520537117722296  | 32183.0 |
| 17 | rs17688534       | 43773877 | A  | T  | 3.3796499102382603e-08 | 5.520537117722296  | 32183.0 |
| 17 | rs17688558       | 43773943 | A  | G  | 3.3796499102382603e-08 | 5.520537117722296  | 32183.0 |
| 17 | rs56162163       | 43774497 | A  | T  | 3.3796499102382603e-08 | 5.520537117722296  | 32183.0 |
| 17 | rs56391096       | 43774845 | C  | T  | 3.3796499102382603e-08 | 5.520537117722296  | 32183.0 |
| 17 | rs17761838       | 43774959 | T  | C  | 3.3796499102382603e-08 | 5.520537117722296  | 32183.0 |
| 17 | rs62056872       | 43775015 | T  | C  | 3.3796499102382603e-08 | 5.520537117722296  | 32183.0 |
| 17 | rs12150621       | 43838482 | G  | T  | 3.382734503984589e-08  | 5.520376823919091  | 32158.0 |
| 17 | rs81632          | 43710127 | T  | A  | 3.3871374600418596e-08 | 5.520148265634709  | 32184.0 |
| 17 | 17:43827156_GA_G | 43827156 | GA | G  | 3.387583939455478e-08  | 5.520125104899122  | 32170.0 |
| 17 | rs566127718      | 43575452 | A  | G  | 3.390922612006399e-08  | 5.519952007926791  | 32106.0 |
| 17 | rs200133133      | 43576046 | T  | TG | 3.395465554493667e-08  | 5.5197167396412015 | 32104.0 |
| 17 | rs17769490       | 43925605 | G  | A  | 3.3957717700750335e-08 | 5.5197008924435    | 32178.0 |
| 17 | rs77063768       | 43925729 | A  | G  | 3.3957717700750335e-08 | 5.5197008924435    | 32178.0 |

|    |             |          |   |    |                        |                    |         |
|----|-------------|----------|---|----|------------------------|--------------------|---------|
| 17 | rs62054818  | 43926056 | A | C  | 3.3957717700750335e-08 | 5.5197008924435    | 32178.0 |
| 17 | rs62064421  | 43667934 | C | G  | 3.4014534385989547e-08 | 5.519407107238791  | 31979.0 |
| 17 | rs55942528  | 43932028 | A | G  | 3.403530393327792e-08  | 5.519299831771972  | 32135.0 |
| 17 | rs62056946  | 43798401 | G | A  | 3.404829120970183e-08  | 5.519232784278897  | 32176.0 |
| 17 | rs78052495  | 43768347 | C | T  | 3.405183403679462e-08  | 5.519214498555403  | 32024.0 |
| 17 | rs62057114  | 43899401 | C | T  | 3.405277885168598e-08  | 5.519209622359312  | 32168.0 |
| 17 | rs62057115  | 43899417 | G | C  | 3.405277885168598e-08  | 5.519209622359312  | 32168.0 |
| 17 | rs149079649 | 44203806 | C | CA | 3.4081253445104184e-08 | 5.5190627263297936 | 32131.0 |
| 17 | rs62061856  | 44200015 | T | C  | 3.4094139656052484e-08 | 5.518996287480888  | 32092.0 |
| 17 | rs76493835  | 43807642 | T | G  | 3.410703064076069e-08  | 5.518929848385509  | 32178.0 |
| 17 | rs62061807  | 44177097 | C | T  | 3.4140166990875507e-08 | 5.51875917801984   | 32147.0 |
| 17 | rs56254732  | 43932049 | C | T  | 3.41418246361071e-08   | 5.51875064445886   | 32133.0 |
| 17 | rs113316734 | 44084157 | T | C  | 3.4170253677776526e-08 | 5.5186043542097405 | 32173.0 |
| 17 | rs62055718  | 43766418 | C | T  | 3.4261501372117504e-08 | 5.518135607820934  | 31989.0 |
| 17 | rs62056877  | 43778828 | T | G  | 3.4265541236767136e-08 | 5.5181148827298845 | 32125.0 |
| 17 | rs56317731  | 44032073 | A | G  | 3.434584110884289e-08  | 5.517703423751748  | 32149.0 |
| 17 | rs80184151  | 43879308 | A | G  | 3.435751477737279e-08  | 5.517643685217931  | 32186.0 |
| 17 | rs111411180 | 44156401 | T | TA | 3.4360016783490094e-08 | 5.517630884077618  | 32130.0 |
| 17 | rs78471340  | 43768346 | G | A  | 3.437121842756125e-08  | 5.51757358362311   | 32030.0 |
| 17 | rs1608955   | 43815713 | C | T  | 3.4372410302365666e-08 | 5.5175674878192895 | 32179.0 |
| 17 | rs1608956   | 43815820 | T | A  | 3.4372410302365666e-08 | 5.5175674878192895 | 32179.0 |
| 17 | rs62054819  | 43926149 | A | G  | 3.447350920302588e-08  | 5.517051165704892  | 32166.0 |
| 17 | rs62073097  | 44316389 | G | A  | 3.448570367878971e-08  | 5.51698898659477   | 32114.0 |
| 17 | rs62053958  | 43751223 | A | T  | 3.452518535700596e-08  | 5.51678781740648   | 32179.0 |
| 17 | rs62055660  | 43751308 | T | C  | 3.452518535700596e-08  | 5.51678781740648   | 32179.0 |
| 17 | rs113486004 | 43751427 | T | C  | 3.452518535700596e-08  | 5.51678781740648   | 32179.0 |
| 17 | rs62056910  | 43784222 | T | C  | 3.4601162349024815e-08 | 5.516401322382399  | 32164.0 |
| 17 | rs62056909  | 43783803 | A | G  | 3.4633928426983526e-08 | 5.516234895299768  | 32023.0 |
| 17 | rs3865315   | 44165169 | C | T  | 3.4781933242383125e-08 | 5.515485039811344  | 32065.0 |
| 17 | rs56080482  | 44032597 | G | A  | 3.480111074447326e-08  | 5.515388104980955  | 32146.0 |
| 17 | rs62056906  | 43782708 | T | C  | 3.482041931728536e-08  | 5.5152905599679185 | 32161.0 |
| 17 | rs62056864  | 43770995 | G | A  | 3.483840986387038e-08  | 5.515199720696769  | 32184.0 |
| 17 | rs62056865  | 43771193 | T | C  | 3.483840986387038e-08  | 5.515199720696769  | 32184.0 |
| 17 | rs2668639   | 44324539 | T | C  | 3.488070536548372e-08  | 5.5149863380461515 | 31828.0 |
| 17 | rs28768976  | 43688317 | A | G  | 3.490042015133093e-08  | 5.514886961829708  | 32137.0 |
| 17 | rs62055956  | 43854449 | C | T  | 3.493164746751046e-08  | 5.514729665832344  | 32126.0 |
| 17 | rs17571718  | 44032768 | T | C  | 3.494436409502258e-08  | 5.51466564962393   | 32139.0 |
| 17 | rs17687849  | 43759719 | A | G  | 3.4991758298159716e-08 | 5.514427263444762  | 32184.0 |
| 17 | rs77310586  | 43765381 | G | C  | 3.4991758298159716e-08 | 5.514427263444762  | 32184.0 |
| 17 | rs17688126  | 43765080 | A | G  | 3.5014932832370335e-08 | 5.514310812776519  | 32184.0 |
| 17 | rs62053959  | 43751246 | C | T  | 3.5021487521131554e-08 | 5.514277889413644  | 32178.0 |
| 17 | rs62060790  | 44137676 | A | T  | 3.503581491383578e-08  | 5.5142059455582055 | 32155.0 |
| 17 | rs62060791  | 44137678 | G | A  | 3.503581491383578e-08  | 5.5142059455582055 | 32155.0 |
| 17 | rs113728380 | 43760199 | C | T  | 3.5068497983300534e-08 | 5.514041936875175  | 32181.0 |
| 17 | rs739645    | 43894990 | T | G  | 3.509865604902733e-08  | 5.513890730513327  | 32181.0 |
| 17 | rs241036    | 43731719 | A | C  | 3.516404509446507e-08  | 5.5135633155887005 | 32186.0 |
| 17 | rs140510364 | 44107606 | A | AT | 3.523736878826704e-08  | 5.5131968720476285 | 31987.0 |
| 17 | rs10451283  | 43814020 | T | C  | 3.526559127360855e-08  | 5.513056024032913  | 32174.0 |
| 17 | rs7210219   | 44018519 | T | C  | 3.530093111026578e-08  | 5.512879810021799  | 30978.0 |
| 17 | rs17688875  | 43778406 | A | G  | 3.532124580270651e-08  | 5.5127785928854385 | 32153.0 |
| 17 | rs56319902  | 43871982 | C | T  | 3.535100423181964e-08  | 5.512630424600003  | 32186.0 |
| 17 | rs112169475 | 43760192 | A | G  | 3.5387776916655774e-08 | 5.512447499099965  | 32182.0 |
| 17 | rs56329743  | 43931245 | G | A  | 3.5439690083240964e-08 | 5.51218957097041   | 32153.0 |
| 17 | rs62055717  | 43766415 | A | G  | 3.5458731311301466e-08 | 5.512095057368865  | 31991.0 |

|    |                  |          |    |                           |                        |                    |         |
|----|------------------|----------|----|---------------------------|------------------------|--------------------|---------|
| 17 | rs12150455       | 43827508 | A  | G                         | 3.5469177530096854e-08 | 5.512043227117552  | 32178.0 |
| 17 | rs76728632       | 43818160 | A  | C                         | 3.5517638218624244e-08 | 5.511802976699446  | 32181.0 |
| 17 | rs62054823       | 43929029 | A  | G                         | 3.554743556415087e-08  | 5.511655410124129  | 32126.0 |
| 17 | rs62057119       | 43899736 | G  | A                         | 3.5555073535069737e-08 | 5.511617603615784  | 32164.0 |
| 17 | rs17762954       | 43899786 | C  | T                         | 3.5555073535069737e-08 | 5.511617603615784  | 32164.0 |
| 17 | rs647483         | 43729432 | C  | T                         | 3.557701083873297e-08  | 5.511509061906429  | 32184.0 |
| 17 | rs78555354       | 44032879 | A  | G                         | 3.5588477737216466e-08 | 5.511452351650585  | 32135.0 |
| 17 | rs75500942       | 43816106 | C  | A                         | 3.561895041544179e-08  | 5.511301733217561  | 32180.0 |
| 17 | rs62054418       | 43816306 | G  | A                         | 3.561895041544179e-08  | 5.511301733217561  | 32180.0 |
| 17 | rs17762535       | 43787130 | T  | C                         | 3.565624324437751e-08  | 5.5111175745458745 | 32174.0 |
| 17 | rs62056922       | 43787563 | C  | G                         | 3.565624324437751e-08  | 5.5111175745458745 | 32174.0 |
| 17 | rs56397077       | 43788419 | C  | A                         | 3.565624324437751e-08  | 5.5111175745458745 | 32174.0 |
| 17 | rs62056925       | 43788649 | T  | C                         | 3.565624324437751e-08  | 5.5111175745458745 | 32174.0 |
| 17 | rs62056926       | 43788666 | C  | G                         | 3.565624324437751e-08  | 5.5111175745458745 | 32174.0 |
| 17 | rs62056935       | 43790446 | A  | G                         | 3.565624324437751e-08  | 5.5111175745458745 | 32174.0 |
| 17 | rs75076131       | 43790649 | C  | A                         | 3.565624324437751e-08  | 5.5111175745458745 | 32174.0 |
| 17 | rs62056936       | 43790911 | A  | T                         | 3.565624324437751e-08  | 5.5111175745458745 | 32174.0 |
| 17 | rs62056937       | 43791181 | A  | C                         | 3.565624324437751e-08  | 5.5111175745458745 | 32174.0 |
| 17 | rs62056939       | 43791332 | T  | C                         | 3.565624324437751e-08  | 5.5111175745458745 | 32174.0 |
| 17 | rs62056940       | 43791344 | T  | A                         | 3.565624324437751e-08  | 5.5111175745458745 | 32174.0 |
| 17 | rs78803763       | 43791405 | C  | A                         | 3.565624324437751e-08  | 5.5111175745458745 | 32174.0 |
| 17 | rs77387379       | 43791429 | G  | A                         | 3.565624324437751e-08  | 5.5111175745458745 | 32174.0 |
| 17 | rs75990322       | 43791468 | T  | C                         | 3.565624324437751e-08  | 5.5111175745458745 | 32174.0 |
| 17 | rs113661667      | 43791610 | T  | C                         | 3.565624324437751e-08  | 5.5111175745458745 | 32174.0 |
| 17 | rs74579538       | 43791652 | G  | A                         | 3.565624324437751e-08  | 5.5111175745458745 | 32174.0 |
| 17 | rs650927         | 43709867 | T  | G                         | 3.5678612575392644e-08 | 5.511007200394684  | 32185.0 |
| 17 | rs671740         | 43709893 | A  | G                         | 3.5678612575392644e-08 | 5.511007200394684  | 32185.0 |
| 17 | rs16940633       | 43710371 | G  | A                         | 3.5678612575392644e-08 | 5.511007200394684  | 32185.0 |
| 17 | rs17686610       | 43710384 | A  | C                         | 3.5678612575392644e-08 | 5.511007200394684  | 32185.0 |
| 17 | rs2942170        | 43711312 | C  | T                         | 3.5678612575392644e-08 | 5.511007200394684  | 32185.0 |
| 17 | rs2040844        | 43767219 | A  | C                         | 3.5684547079835254e-08 | 5.510977929787433  | 32185.0 |
| 17 | rs62055884       | 43837567 | C  | T                         | 3.5700871953977704e-08 | 5.5108974353708335 | 32163.0 |
| 17 | 17:44254993_GT_G | 44254993 | GT | G                         | 3.5773308938814616e-08 | 5.5105406943972515 | 31691.0 |
| 17 | rs62056920       | 43787226 | G  | A                         | 3.5780498566236814e-08 | 5.510505324819525  | 32173.0 |
| 17 | rs62056921       | 43787306 | T  | C                         | 3.5780498566236814e-08 | 5.510505324819525  | 32173.0 |
| 17 | rs12150658       | 43826305 | G  | A                         | 3.5793269842244536e-08 | 5.510442513155876  | 32179.0 |
| 17 | rs17688032       | 43763202 | G  | A                         | 3.581138046817069e-08  | 5.510353478769785  | 32186.0 |
| 17 | 17:43819597_AC_A | 43819597 | AC | A                         | 3.591687302740046e-08  | 5.5098357289458235 | 32172.0 |
| 17 | rs62053956       | 43750315 | A  | G                         | 3.5921228482972986e-08 | 5.509814384403341  | 32182.0 |
| 17 | rs55821155       | 44032470 | C  | G                         | 3.5928447234313165e-08 | 5.509779013391217  | 32147.0 |
| 17 | rs138325961      | 43971238 | T  | TTAG<br>ATAC<br>ATCA<br>T | 3.593404896875489e-08  | 5.509751570316446  | 32100.0 |
| 17 | rs1724413        | 43670073 | G  | T                         | 3.60517583535248e-08   | 5.509175865898538  | 31694.0 |
| 17 | rs113072604      | 43741627 | A  | AT                        | 3.611150518105404e-08  | 5.508884347493561  | 32172.0 |
| 17 | rs62056927       | 43788767 | G  | A                         | 3.6140413404223836e-08 | 5.508743465559549  | 32173.0 |
| 17 | rs62056929       | 43789144 | G  | A                         | 3.6140413404223836e-08 | 5.508743465559549  | 32173.0 |
| 17 | 17:43809559_GT_G | 43809559 | GT | G                         | 3.6186262468029605e-08 | 5.508520247758817  | 32058.0 |
| 17 | rs1526127        | 43812398 | C  | G                         | 3.6200680356514286e-08 | 5.508450110443748  | 32182.0 |
| 17 | rs62054398       | 43812599 | A  | G                         | 3.6200680356514286e-08 | 5.508450110443748  | 32182.0 |
| 17 | rs62054399       | 43812624 | G  | A                         | 3.6200680356514286e-08 | 5.508450110443748  | 32182.0 |
| 17 | rs62054400       | 43812649 | T  | C                         | 3.6200680356514286e-08 | 5.508450110443748  | 32182.0 |
| 17 | rs62054411       | 43812684 | A  | G                         | 3.6200680356514286e-08 | 5.508450110443748  | 32182.0 |
| 17 | rs62054412       | 43813002 | G  | A                         | 3.6200680356514286e-08 | 5.508450110443748  | 32182.0 |
| 17 | rs17563787       | 43813252 | C  | G                         | 3.6200680356514286e-08 | 5.508450110443748  | 32182.0 |
| 17 | rs62054413       | 43813370 | G  | C                         | 3.6200680356514286e-08 | 5.508450110443748  | 32182.0 |

|    |                                 |          |                   |   |                        |                    |         |
|----|---------------------------------|----------|-------------------|---|------------------------|--------------------|---------|
| 17 | rs62054414                      | 43813415 | G                 | A | 3.6200680356514286e-08 | 5.508450110443748  | 32182.0 |
| 17 | rs76421814                      | 43814427 | T                 | C | 3.6200680356514286e-08 | 5.508450110443748  | 32182.0 |
| 17 | rs56006248                      | 43815141 | A                 | G | 3.6200680356514286e-08 | 5.508450110443748  | 32182.0 |
| 17 | rs56298110                      | 43815336 | A                 | G | 3.6200680356514286e-08 | 5.508450110443748  | 32182.0 |
| 17 | rs62054417                      | 43815859 | A                 | C | 3.6200680356514286e-08 | 5.508450110443748  | 32182.0 |
| 17 | rs62054419                      | 43816605 | A                 | C | 3.6200680356514286e-08 | 5.508450110443748  | 32182.0 |
| 17 | rs62054420                      | 43816655 | C                 | G | 3.6200680356514286e-08 | 5.508450110443748  | 32182.0 |
| 17 | rs62054421                      | 43816657 | G                 | A | 3.6200680356514286e-08 | 5.508450110443748  | 32182.0 |
| 17 | rs17563800                      | 43817459 | C                 | T | 3.6200680356514286e-08 | 5.508450110443748  | 32182.0 |
| 17 | rs56295996                      | 43817557 | C                 | T | 3.6200680356514286e-08 | 5.508450110443748  | 32182.0 |
| 17 | rs56384960                      | 43817608 | G                 | A | 3.6200680356514286e-08 | 5.508450110443748  | 32182.0 |
| 17 | rs56178230                      | 43817832 | G                 | A | 3.6200680356514286e-08 | 5.508450110443748  | 32182.0 |
| 17 | rs80157557                      | 43817898 | G                 | A | 3.6200680356514286e-08 | 5.508450110443748  | 32182.0 |
| 17 | rs17563827                      | 43818222 | C                 | A | 3.6200680356514286e-08 | 5.508450110443748  | 32182.0 |
| 17 | 17:43926093_GATGA_G             | 43926093 | GATGA             | G | 3.6203062984104864e-08 | 5.508438522513081  | 31484.0 |
| 17 | rs885639                        | 43928614 | T                 | G | 3.6209584645258666e-08 | 5.5084068081381785 | 32159.0 |
| 17 | rs56167344                      | 43797087 | A                 | T | 3.621686016360773e-08  | 5.508371434346075  | 32142.0 |
| 17 | rs17688056                      | 43763241 | C                 | T | 3.625752906811529e-08  | 5.508173827739405  | 32183.0 |
| 17 | rs34739559                      | 43949342 | G                 | A | 3.629409390450489e-08  | 5.507996345873084  | 31935.0 |
| 17 | rs111920741                     | 44333412 | G                 | A | 3.6301008842286265e-08 | 5.507962800992825  | 31907.0 |
| 17 | rs62056863                      | 43770595 | A                 | G | 3.632163559271736e-08  | 5.507862775885974  | 32185.0 |
| 17 | rs77301847                      | 43810902 | A                 | G | 3.6341770317166585e-08 | 5.507765189877524  | 31746.0 |
| 17 | rs113520245                     | 44033132 | C                 | T | 3.6386105209390584e-08 | 5.507550498787291  | 31688.0 |
| 17 | rs1706722                       | 43684094 | T                 | C | 3.643541432590775e-08  | 5.5073120178830655 | 31744.0 |
| 17 | rs56108117                      | 43757776 | T                 | C | 3.643806449323019e-08  | 5.5072992093559    | 32182.0 |
| 17 | rs56378021                      | 43757777 | C                 | T | 3.643806449323019e-08  | 5.5072992093559    | 32182.0 |
| 17 | 17:43913360_TGAGGGCAGG<br>AGG T | 43913360 | TGAGGGCA<br>GGAGG | T | 3.652474054644246e-08  | 5.506880792431387  | 32128.0 |
| 17 | rs62055693                      | 43756910 | T                 | C | 3.6525752536457107e-08 | 5.506875912876061  | 32185.0 |
| 17 | 17:43769819_AAAATT_A            | 43769819 | AAAATT            | A | 3.659121067296127e-08  | 5.506560568794176  | 32129.0 |
| 17 | rs757502                        | 43756506 | C                 | T | 3.660958996470194e-08  | 5.506472125066298  | 32170.0 |
| 17 | rs17652036                      | 44073027 | G                 | A | 3.6609843535396464e-08 | 5.506470905149759  | 32140.0 |
| 17 | rs62054428                      | 43822511 | G                 | A | 3.6682562446931016e-08 | 5.506121395638491  | 32176.0 |
| 17 | rs76171147                      | 43823229 | T                 | C | 3.670835892459555e-08  | 5.505997571260946  | 32186.0 |
| 17 | rs383241                        | 43705356 | G                 | A | 3.671191845388397e-08  | 5.505980491969278  | 32186.0 |
| 17 | rs376120                        | 43705518 | A                 | G | 3.671191845388397e-08  | 5.505980491969278  | 32186.0 |
| 17 | rs594591                        | 43707620 | G                 | T | 3.671191845388397e-08  | 5.505980491969278  | 32186.0 |
| 17 | rs2942169                       | 43711539 | G                 | C | 3.671191845388397e-08  | 5.505980491969278  | 32186.0 |
| 17 | rs241045                        | 43712337 | C                 | T | 3.671191845388397e-08  | 5.505980491969278  | 32186.0 |
| 17 | rs241044                        | 43712464 | G                 | A | 3.671191845388397e-08  | 5.505980491969278  | 32186.0 |
| 17 | rs241042                        | 43712657 | T                 | C | 3.671191845388397e-08  | 5.505980491969278  | 32186.0 |
| 17 | rs241041                        | 43713925 | A                 | G | 3.671191845388397e-08  | 5.505980491969278  | 32186.0 |
| 17 | rs241039                        | 43714673 | A                 | T | 3.671191845388397e-08  | 5.505980491969278  | 32186.0 |
| 17 | rs2942168                       | 43714850 | G                 | A | 3.671191845388397e-08  | 5.505980491969278  | 32186.0 |
| 17 | rs2942167                       | 43715018 | T                 | C | 3.671191845388397e-08  | 5.505980491969278  | 32186.0 |
| 17 | rs2942165                       | 43715619 | G                 | C | 3.671191845388397e-08  | 5.505980491969278  | 32186.0 |
| 17 | rs117368197                     | 43715924 | A                 | G | 3.671191845388397e-08  | 5.505980491969278  | 32186.0 |
| 17 | rs413778                        | 43716885 | A                 | G | 3.671191845388397e-08  | 5.505980491969278  | 32186.0 |
| 17 | rs389217                        | 43717131 | C                 | T | 3.671191845388397e-08  | 5.505980491969278  | 32186.0 |
| 17 | rs3108317                       | 43719870 | G                 | A | 3.671191845388397e-08  | 5.505980491969278  | 32186.0 |
| 17 | rs1706746                       | 43721457 | C                 | T | 3.671191845388397e-08  | 5.505980491969278  | 32186.0 |
| 17 | rs3418                          | 43723462 | C                 | T | 3.671191845388397e-08  | 5.505980491969278  | 32186.0 |
| 17 | rs393675                        | 43723605 | T                 | C | 3.671191845388397e-08  | 5.505980491969278  | 32186.0 |
| 17 | rs449501                        | 43724555 | G                 | A | 3.671191845388397e-08  | 5.505980491969278  | 32186.0 |
| 17 | rs448830                        | 43725212 | G                 | A | 3.671191845388397e-08  | 5.505980491969278  | 32186.0 |



|    |                  |          |    |     |                        |                    |         |
|----|------------------|----------|----|-----|------------------------|--------------------|---------|
| 17 | rs434428         | 43725684 | G  | A   | 3.671191845388397e-08  | 5.505980491969278  | 32186.0 |
| 17 | rs434598         | 43725762 | G  | A   | 3.671191845388397e-08  | 5.505980491969278  | 32186.0 |
| 17 | rs434971         | 43725992 | G  | A   | 3.671191845388397e-08  | 5.505980491969278  | 32186.0 |
| 17 | rs385691         | 43726125 | A  | C   | 3.671191845388397e-08  | 5.505980491969278  | 32186.0 |
| 17 | rs455028         | 43726574 | T  | C   | 3.671191845388397e-08  | 5.505980491969278  | 32186.0 |
| 17 | rs241035         | 43731896 | C  | T   | 3.671191845388397e-08  | 5.505980491969278  | 32186.0 |
| 17 | rs62055700       | 43758742 | T  | C   | 3.6743714956888776e-08 | 5.50582799757174   | 32184.0 |
| 17 | rs62053957       | 43750939 | T  | C   | 3.67951551414605e-08   | 5.505581563880859  | 32183.0 |
| 17 | rs62055751       | 43767538 | A  | G   | 3.685049374559409e-08  | 5.5053168268806525 | 32185.0 |
| 17 | rs75691066       | 44045585 | C  | A   | 3.6852663045387044e-08 | 5.505306456918514  | 32142.0 |
| 17 | rs424243         | 43727887 | A  | T   | 3.6873469153714466e-08 | 5.505207026976764  | 32184.0 |
| 17 | rs62053953       | 43749454 | G  | A   | 3.690910877234945e-08  | 5.505036835795454  | 32186.0 |
| 17 | rs62056876       | 43778752 | C  | T   | 3.691958991414744e-08  | 5.504986815140759  | 32152.0 |
| 17 | rs34579278       | 43833981 | A  | G   | 3.696359136511305e-08  | 5.504776970871898  | 32172.0 |
| 17 | rs453997         | 43727061 | C  | T   | 3.6976264090753444e-08 | 5.5047165791877655 | 32185.0 |
| 17 | rs422112         | 43728137 | G  | A   | 3.6976264090753444e-08 | 5.5047165791877655 | 32185.0 |
| 17 | rs413844         | 43729384 | G  | A   | 3.6976264090753444e-08 | 5.5047165791877655 | 32185.0 |
| 17 | rs241038         | 43730598 | G  | A   | 3.6976264090753444e-08 | 5.5047165791877655 | 32185.0 |
| 17 | rs241037         | 43730636 | G  | T   | 3.6976264090753444e-08 | 5.5047165791877655 | 32185.0 |
| 17 | rs241032         | 43734145 | T  | C   | 3.6994064293298334e-08 | 5.504631786479503  | 32178.0 |
| 17 | rs674692         | 43695967 | A  | G   | 3.701494860621404e-08  | 5.504532352792246  | 32143.0 |
| 17 | rs675726         | 43696254 | A  | G   | 3.701494860621404e-08  | 5.504532352792246  | 32143.0 |
| 17 | rs143345034      | 43696920 | C  | T   | 3.701494860621404e-08  | 5.504532352792246  | 32143.0 |
| 17 | 17:44130328_TC_T | 44130328 | TC | T   | 3.704251306492258e-08  | 5.504401197084408  | 32098.0 |
| 17 | rs2732625        | 44332429 | C  | T   | 3.7063167523765334e-08 | 5.504302982181274  | 32126.0 |
| 17 | rs413519         | 43685826 | A  | G   | 3.7130983089119044e-08 | 5.5039808823220415 | 32070.0 |
| 17 | rs143143028      | 44170129 | C  | CAA | 3.7255885438319916e-08 | 5.5033891307420095 | 31881.0 |
| 17 | rs17689378       | 43881790 | C  | T   | 3.732559695772039e-08  | 5.503059693555584  | 32186.0 |
| 17 | rs62055932       | 43848412 | A  | G   | 3.7389870292894336e-08 | 5.502756483975331  | 32143.0 |
| 17 | rs77555455       | 44035516 | G  | A   | 3.739103519525221e-08  | 5.502750993211269  | 32128.0 |
| 17 | rs2950009        | 43666244 | A  | G   | 3.742133513926251e-08  | 5.502608232754802  | 32030.0 |
| 17 | rs2950010        | 43666251 | C  | G   | 3.743649413013168e-08  | 5.502536852099861  | 32119.0 |
| 17 | rs12150610       | 43775479 | T  | C   | 3.744232611291778e-08  | 5.502509397926059  | 32178.0 |
| 17 | rs2873269        | 43931122 | C  | T   | 3.7539786899742076e-08 | 5.502051212058276  | 32157.0 |
| 17 | rs757500         | 43756833 | C  | A   | 3.7586593861779556e-08 | 5.501831571534178  | 32186.0 |
| 17 | rs55651627       | 43758011 | G  | C   | 3.7586593861779556e-08 | 5.501831571534178  | 32186.0 |
| 17 | rs112155389      | 43758078 | G  | A   | 3.7586593861779556e-08 | 5.501831571534178  | 32186.0 |
| 17 | rs17687838       | 43759048 | T  | C   | 3.7586593861779556e-08 | 5.501831571534178  | 32186.0 |
| 17 | rs76333921       | 43759426 | C  | T   | 3.7586593861779556e-08 | 5.501831571534178  | 32186.0 |
| 17 | rs76453925       | 43759431 | C  | T   | 3.7586593861779556e-08 | 5.501831571534178  | 32186.0 |
| 17 | rs17761100       | 43760389 | A  | G   | 3.7586593861779556e-08 | 5.501831571534178  | 32186.0 |
| 17 | rs17761124       | 43760516 | A  | T   | 3.7586593861779556e-08 | 5.501831571534178  | 32186.0 |
| 17 | rs62055704       | 43760577 | G  | A   | 3.7586593861779556e-08 | 5.501831571534178  | 32186.0 |
| 17 | rs62055705       | 43760599 | A  | C   | 3.7586593861779556e-08 | 5.501831571534178  | 32186.0 |
| 17 | rs62055706       | 43760685 | T  | C   | 3.7586593861779556e-08 | 5.501831571534178  | 32186.0 |
| 17 | rs75115093       | 43761381 | A  | G   | 3.7586593861779556e-08 | 5.501831571534178  | 32186.0 |
| 17 | rs62055707       | 43761482 | T  | C   | 3.7586593861779556e-08 | 5.501831571534178  | 32186.0 |
| 17 | rs2049515        | 43761856 | C  | T   | 3.7586593861779556e-08 | 5.501831571534178  | 32186.0 |
| 17 | rs62055709       | 43762429 | C  | T   | 3.7586593861779556e-08 | 5.501831571534178  | 32186.0 |
| 17 | rs62055711       | 43762554 | A  | G   | 3.7586593861779556e-08 | 5.501831571534178  | 32186.0 |
| 17 | rs17688002       | 43762594 | A  | T   | 3.7586593861779556e-08 | 5.501831571534178  | 32186.0 |
| 17 | rs2040846        | 43762846 | A  | G   | 3.7586593861779556e-08 | 5.501831571534178  | 32186.0 |
| 17 | rs4486953        | 43763007 | T  | C   | 3.7586593861779556e-08 | 5.501831571534178  | 32186.0 |
| 17 | rs17688068       | 43763935 | A  | G   | 3.7586593861779556e-08 | 5.501831571534178  | 32186.0 |

|    |                               |          |                 |                           |                        |                    |         |
|----|-------------------------------|----------|-----------------|---------------------------|------------------------|--------------------|---------|
| 17 | rs62055712                    | 43764565 | A               | G                         | 3.7586593861779556e-08 | 5.501831571534178  | 32186.0 |
| 17 | rs62055713                    | 43764685 | C               | T                         | 3.7586593861779556e-08 | 5.501831571534178  | 32186.0 |
| 17 | rs17688090                    | 43764987 | G               | A                         | 3.7586593861779556e-08 | 5.501831571534178  | 32186.0 |
| 17 | rs17761387                    | 43765450 | G               | A                         | 3.7586593861779556e-08 | 5.501831571534178  | 32186.0 |
| 17 | rs62055716                    | 43765778 | C               | T                         | 3.7586593861779556e-08 | 5.501831571534178  | 32186.0 |
| 17 | rs17688205                    | 43766352 | G               | C                         | 3.7586593861779556e-08 | 5.501831571534178  | 32186.0 |
| 17 | rs17688249                    | 43766754 | C               | T                         | 3.7586593861779556e-08 | 5.501831571534178  | 32186.0 |
| 17 | rs62055753                    | 43767631 | G               | A                         | 3.7586593861779556e-08 | 5.501831571534178  | 32186.0 |
| 17 | rs17688296                    | 43767815 | C               | T                         | 3.7586593861779556e-08 | 5.501831571534178  | 32186.0 |
| 17 | rs62055754                    | 43768230 | C               | G                         | 3.7586593861779556e-08 | 5.501831571534178  | 32186.0 |
| 17 | rs55972157                    | 43768703 | C               | T                         | 3.7586593861779556e-08 | 5.501831571534178  | 32186.0 |
| 17 | rs17761581                    | 43769088 | T               | C                         | 3.7586593861779556e-08 | 5.501831571534178  | 32186.0 |
| 17 | rs56283089                    | 43769321 | A               | C                         | 3.7586593861779556e-08 | 5.501831571534178  | 32186.0 |
| 17 | rs56312737                    | 43769516 | C               | A                         | 3.7586593861779556e-08 | 5.501831571534178  | 32186.0 |
| 17 | rs74765707                    | 43770416 | T               | C                         | 3.7586593861779556e-08 | 5.501831571534178  | 32186.0 |
| 17 | rs62056861                    | 43770443 | T               | C                         | 3.7586593861779556e-08 | 5.501831571534178  | 32186.0 |
| 17 | rs62056862                    | 43770525 | C               | T                         | 3.7586593861779556e-08 | 5.501831571534178  | 32186.0 |
| 17 | rs56290582                    | 43788371 | C               | T                         | 3.7591668047084514e-08 | 5.501807776982367  | 32172.0 |
| 17 | rs241034                      | 43733048 | A               | T                         | 3.765091648253655e-08  | 5.501530171542176  | 32185.0 |
| 17 | rs241033                      | 43733983 | G               | A                         | 3.765091648253655e-08  | 5.501530171542176  | 32185.0 |
| 17 | rs241031                      | 43734304 | T               | C                         | 3.765091648253655e-08  | 5.501530171542176  | 32185.0 |
| 17 | rs241030                      | 43734503 | A               | G                         | 3.765091648253655e-08  | 5.501530171542176  | 32185.0 |
| 17 | rs241029                      | 43734643 | T               | C                         | 3.765091648253655e-08  | 5.501530171542176  | 32185.0 |
| 17 | rs241028                      | 43735276 | C               | T                         | 3.765091648253655e-08  | 5.501530171542176  | 32185.0 |
| 17 | rs241027                      | 43735478 | A               | G                         | 3.765091648253655e-08  | 5.501530171542176  | 32185.0 |
| 17 | rs241026                      | 43735555 | G               | A                         | 3.765091648253655e-08  | 5.501530171542176  | 32185.0 |
| 17 | rs241024                      | 43736763 | C               | T                         | 3.765091648253655e-08  | 5.501530171542176  | 32185.0 |
| 17 | rs241023                      | 43737040 | G               | A                         | 3.765091648253655e-08  | 5.501530171542176  | 32185.0 |
| 17 | rs241021                      | 43738627 | T               | G                         | 3.765091648253655e-08  | 5.501530171542176  | 32185.0 |
| 17 | rs241020                      | 43738676 | C               | A                         | 3.765091648253655e-08  | 5.501530171542176  | 32185.0 |
| 17 | 17:43746187_TC_T              | 43746187 | TC              | T                         | 3.7681553138283726e-08 | 5.501386791223204  | 32180.0 |
| 17 | rs55980621                    | 43768496 | C               | T                         | 3.769094457454167e-08  | 5.501342861704282  | 32184.0 |
| 17 | rs55669046                    | 43768501 | C               | T                         | 3.769094457454167e-08  | 5.501342861704282  | 32184.0 |
| 17 | rs1706748                     | 43722509 | C               | G                         | 3.772461605432588e-08  | 5.501185446710036  | 32182.0 |
| 17 | rs113871181                   | 43852733 | G               | A                         | 3.777544001042181e-08  | 5.500948101331852  | 32105.0 |
| 17 | 17:43734255_TA_T              | 43734255 | TA              | T                         | 3.7782762090692286e-08 | 5.500913933100693  | 32184.0 |
| 17 | rs62055697                    | 43758148 | C               | T                         | 3.779335541677192e-08  | 5.500864511079586  | 32185.0 |
| 17 | rs17761046                    | 43758382 | T               | C                         | 3.779335541677192e-08  | 5.500864511079586  | 32185.0 |
| 17 | rs56168907                    | 43837091 | T               | C                         | 3.780159668190928e-08  | 5.500826071635549  | 32162.0 |
| 17 | rs62056912                    | 43784948 | G               | T                         | 3.783287717461231e-08  | 5.500680245058068  | 32167.0 |
| 17 | rs62054822                    | 43927708 | A               | G                         | 3.790522027956596e-08  | 5.500343436040021  | 32170.0 |
| 17 | rs4609899                     | 43807113 | C               | T                         | 3.7935271938506986e-08 | 5.500203707251651  | 32165.0 |
| 17 | rs4471726                     | 43807134 | T               | C                         | 3.794380613714663e-08  | 5.5001640460432375 | 32166.0 |
| 17 | 17:43893146_CCCAGTTCAGTGTGT C | 43893146 | CCCAGTTCAGTGTGT | C                         | 3.796324486816303e-08  | 5.500073740194902  | 32117.0 |
| 17 | rs3108318                     | 43719829 | G               | T                         | 3.800872753996719e-08  | 5.499862617989188  | 32095.0 |
| 17 | rs62064424                    | 43668239 | T               | C                         | 3.81007759663926e-08   | 5.499436094727134  | 31951.0 |
| 17 | rs62055719                    | 43766497 | T               | C                         | 3.8127285228853264e-08 | 5.499313444526871  | 32181.0 |
| 17 | rs77220413                    | 43764378 | G               | A                         | 3.814246034497955e-08  | 5.4992432711489965 | 32186.0 |
| 17 | rs62073155                    | 44333121 | G               | A                         | 3.81560569934822e-08   | 5.4991804199771614 | 32146.0 |
| 17 | rs62054817                    | 43925966 | G               | A                         | 3.8157905448128256e-08 | 5.499171877082409  | 32174.0 |
| 17 | rs56110538                    | 43768727 | G               | A                         | 3.816741317204504e-08  | 5.499127942130751  | 32184.0 |
| 17 | rs62056928                    | 43788782 | C               | T                         | 3.8168205587118066e-08 | 5.499124280879916  | 32171.0 |
| 17 | rs113448888                   | 44108482 | A               | AGCC<br>CTCT<br>AAAA<br>C | 3.8181150648238686e-08 | 5.499064480343653  | 32114.0 |
| 17 | rs112245406                   | 43756171 | A               | C                         | 3.8223846968633615e-08 | 5.498867381244335  | 32116.0 |

|    |                  |          |    |    |                        |                    |         |
|----|------------------|----------|----|----|------------------------|--------------------|---------|
| 17 | rs112695020      | 44037106 | C  | CA | 3.823522291139548e-08  | 5.498814902480753  | 32073.0 |
| 17 | rs17425752       | 43906726 | A  | C  | 3.826129425875895e-08  | 5.498694688919536  | 32145.0 |
| 17 | rs56220242       | 43792326 | C  | T  | 3.832939999970981e-08  | 5.498381031463467  | 32167.0 |
| 17 | rs56160448       | 43792358 | A  | G  | 3.832939999970981e-08  | 5.498381031463467  | 32167.0 |
| 17 | rs1880749        | 43792586 | A  | C  | 3.832939999970981e-08  | 5.498381031463467  | 32167.0 |
| 17 | rs370739771      | 44255146 | C  | CT | 3.834677667024303e-08  | 5.498301090649825  | 30569.0 |
| 17 | rs190796367      | 44333293 | A  | G  | 3.835062445724713e-08  | 5.498283393780254  | 32148.0 |
| 17 | rs55747440       | 43837115 | A  | G  | 3.8399218703425435e-08 | 5.4980600455786215 | 32163.0 |
| 17 | rs241022         | 43737730 | T  | C  | 3.842367137684136e-08  | 5.497947760184788  | 32184.0 |
| 17 | rs111273167      | 43740967 | C  | T  | 3.844840534351232e-08  | 5.497834253582108  | 32186.0 |
| 17 | rs62053940       | 43741028 | A  | G  | 3.844840534351232e-08  | 5.497834253582108  | 32186.0 |
| 17 | rs17760577       | 43741452 | C  | T  | 3.844840534351232e-08  | 5.497834253582108  | 32186.0 |
| 17 | rs17760631       | 43743045 | T  | C  | 3.844840534351232e-08  | 5.497834253582108  | 32186.0 |
| 17 | rs4528616        | 43683597 | T  | G  | 3.846849653923763e-08  | 5.497742105219738  | 32092.0 |
| 17 | rs62056915       | 43785627 | A  | T  | 3.8553098626559806e-08 | 5.4973545887057735 | 32166.0 |
| 17 | rs56100013       | 43768467 | C  | T  | 3.856256939395242e-08  | 5.4973112595665565 | 32184.0 |
| 17 | rs2532372        | 43671235 | C  | T  | 3.8580450010123496e-08 | 5.497229483159062  | 31987.0 |
| 17 | rs62053954       | 43749949 | G  | A  | 3.8580583478084046e-08 | 5.497228872885958  | 32184.0 |
| 17 | rs62053955       | 43749980 | T  | C  | 3.8580583478084046e-08 | 5.497228872885958  | 32184.0 |
| 17 | rs17687625       | 43750238 | A  | G  | 3.8580583478084046e-08 | 5.497228872885958  | 32184.0 |
| 17 | rs1724412        | 43670018 | G  | A  | 3.87528662132884e-08   | 5.496442823870502  | 31783.0 |
| 17 | rs444071         | 43707951 | C  | T  | 3.8766005491175384e-08 | 5.4963830143810215 | 32185.0 |
| 17 | rs396593         | 43707955 | C  | A  | 3.8766005491175384e-08 | 5.4963830143810215 | 32185.0 |
| 17 | rs17762912       | 43899161 | A  | C  | 3.8766944177995385e-08 | 5.496378742266991  | 32172.0 |
| 17 | rs2532384        | 44317210 | C  | A  | 3.879551772597827e-08  | 5.496248747452748  | 32144.0 |
| 17 | rs366858         | 43726588 | C  | T  | 3.879954382647845e-08  | 5.496230438248186  | 32185.0 |
| 17 | rs62057111       | 43897130 | A  | G  | 3.88376778606795e-08   | 5.496057110184426  | 32179.0 |
| 17 | rs370670279      | 43669049 | A  | AC | 3.883875259033097e-08  | 5.496052227679467  | 32124.0 |
| 17 | rs184745911      | 43698899 | A  | G  | 3.890678846924988e-08  | 5.4957434065365325 | 32098.0 |
| 17 | rs78487840       | 43757161 | C  | T  | 3.9030924295999643e-08 | 5.49518128956491   | 32186.0 |
| 17 | rs62062796       | 44027316 | G  | A  | 3.9054690350353065e-08 | 5.495073868895997  | 32155.0 |
| 17 | rs2693349        | 43666511 | A  | T  | 3.9099830822971936e-08 | 5.494870011991601  | 32027.0 |
| 17 | rs75788861       | 43822769 | C  | T  | 3.913108062409524e-08  | 5.494729019781338  | 31566.0 |
| 17 | rs2158474        | 43761939 | G  | C  | 3.926148379578634e-08  | 5.494141845481507  | 32184.0 |
| 17 | rs62055708       | 43761974 | C  | A  | 3.926148379578634e-08  | 5.494141845481507  | 32184.0 |
| 17 | rs76927677       | 43761985 | A  | T  | 3.926148379578634e-08  | 5.494141845481507  | 32184.0 |
| 17 | rs17761207       | 43762255 | T  | C  | 3.926148379578634e-08  | 5.494141845481507  | 32184.0 |
| 17 | 17:44288114_TA_T | 44288114 | TA | T  | 3.9287696984024674e-08 | 5.494024042082318  | 31785.0 |
| 17 | rs55711776       | 43669250 | A  | G  | 3.933364532677643e-08  | 5.493817731672099  | 31998.0 |
| 17 | rs56400821       | 43760080 | C  | A  | 3.935160393948267e-08  | 5.493737160097438  | 32178.0 |
| 17 | rs56357543       | 43894547 | C  | T  | 3.936058625753368e-08  | 5.493696874174197  | 32172.0 |
| 17 | rs56099546       | 43894609 | A  | G  | 3.936058625753368e-08  | 5.493696874174197  | 32172.0 |
| 17 | 17:43742454_AC_A | 43742454 | AC | A  | 3.937392734410112e-08  | 5.493637055514959  | 32183.0 |
| 17 | rs62053951       | 43749168 | G  | C  | 3.951837561155437e-08  | 5.492990635015013  | 32185.0 |
| 17 | rs62053952       | 43749261 | T  | C  | 3.951837561155437e-08  | 5.492990635015013  | 32185.0 |
| 17 | rs17687534       | 43749579 | T  | C  | 3.951837561155437e-08  | 5.492990635015013  | 32185.0 |
| 17 | rs17687571       | 43750010 | G  | A  | 3.951837561155437e-08  | 5.492990635015013  | 32185.0 |
| 17 | rs17760817       | 43750137 | G  | C  | 3.951837561155437e-08  | 5.492990635015013  | 32185.0 |
| 17 | rs62055661       | 43752039 | C  | T  | 3.951837561155437e-08  | 5.492990635015013  | 32185.0 |
| 17 | rs62055662       | 43752566 | C  | T  | 3.951837561155437e-08  | 5.492990635015013  | 32185.0 |
| 17 | rs62055663       | 43753454 | A  | G  | 3.951837561155437e-08  | 5.492990635015013  | 32185.0 |
| 17 | rs62055664       | 43753642 | A  | G  | 3.951837561155437e-08  | 5.492990635015013  | 32185.0 |
| 17 | rs76717812       | 43754010 | T  | C  | 3.951837561155437e-08  | 5.492990635015013  | 32185.0 |
| 17 | rs17687667       | 43754099 | G  | A  | 3.951837561155437e-08  | 5.492990635015013  | 32185.0 |

|    |                     |          |       |      |                        |                    |         |
|----|---------------------|----------|-------|------|------------------------|--------------------|---------|
| 17 | rs79073784          | 43754209 | G     | C    | 3.951837561155437e-08  | 5.492990635015013  | 32185.0 |
| 17 | rs62055714          | 43764796 | G     | T    | 3.956773477604288e-08  | 5.492770272931184  | 32185.0 |
| 17 | rs62055715          | 43764847 | G     | A    | 3.956773477604288e-08  | 5.492770272931184  | 32185.0 |
| 17 | rs35879086          | 43830382 | G     | A    | 3.9633732303241736e-08 | 5.49247604564554   | 32167.0 |
| 17 | rs111957446         | 44179723 | T     | C    | 3.97476323012416e-08   | 5.491969377374328  | 32123.0 |
| 17 | rs17760733          | 43746276 | G     | T    | 3.9996438449544734e-08 | 5.490867477019694  | 32183.0 |
| 17 | rs79675109          | 43746418 | T     | A    | 3.9996438449544734e-08 | 5.490867477019694  | 32183.0 |
| 17 | rs17687504          | 43746721 | A     | G    | 3.9996438449544734e-08 | 5.490867477019694  | 32183.0 |
| 17 | rs62053945          | 43746839 | T     | C    | 3.9996438449544734e-08 | 5.490867477019694  | 32183.0 |
| 17 | rs62053946          | 43747677 | C     | T    | 3.9996438449544734e-08 | 5.490867477019694  | 32183.0 |
| 17 | rs62053947          | 43747683 | G     | A    | 3.9996438449544734e-08 | 5.490867477019694  | 32183.0 |
| 17 | rs62053949          | 43748101 | A     | G    | 3.9996438449544734e-08 | 5.490867477019694  | 32183.0 |
| 17 | rs62053950          | 43748412 | A     | G    | 3.9996438449544734e-08 | 5.490867477019694  | 32183.0 |
| 17 | 17:44029510_TGATG_T | 44029510 | TGATG | T    | 4.002548430873058e-08  | 5.4907392736844205 | 32081.0 |
| 17 | rs17571781          | 44033802 | T     | C    | 4.003849248186777e-08  | 5.490681887132295  | 32125.0 |
| 17 | 17:43950444_CA_C    | 43950444 | CA    | C    | 4.0118431297076336e-08 | 5.490329627353512  | 31808.0 |
| 17 | rs56323832          | 43768633 | G     | A    | 4.013396612499538e-08  | 5.490261250302444  | 32182.0 |
| 17 | rs74514268          | 43836191 | G     | A    | 4.0208670951907525e-08 | 5.4899327926152415 | 32170.0 |
| 17 | rs62054762          | 43909022 | G     | T    | 4.0247465547154884e-08 | 5.489762456238568  | 32003.0 |
| 17 | rs8072451           | 43893716 | C     | T    | 4.042731559810085e-08  | 5.488974858383769  | 32065.0 |
| 17 | rs62066125          | 43702701 | C     | G    | 4.044827941667506e-08  | 5.488883274990339  | 32163.0 |
| 17 | rs2696462           | 44286089 | G     | A    | 4.055101600489803e-08  | 5.488435120166723  | 31729.0 |
| 17 | rs56013908          | 43836920 | T     | C    | 4.05515765769718e-08   | 5.488432677875389  | 32156.0 |
| 17 | rs62053948          | 43748046 | C     | T    | 4.0677757903938884e-08 | 5.487883764449598  | 32180.0 |
| 17 | rs62054760          | 43908989 | C     | T    | 4.068338112855907e-08  | 5.487859340769485  | 32004.0 |
| 17 | rs368303226         | 43798784 | A     | AGAG | 4.089847669958917e-08  | 5.486927552503543  | 32154.0 |
| 17 | rs2188888           | 43953695 | T     | C    | 4.104457204460076e-08  | 5.486297377263427  | 32034.0 |
| 17 | rs62055665          | 43754505 | A     | C    | 4.1044713857461073e-08 | 5.486296766617754  | 32184.0 |
| 17 | rs62055690          | 43754576 | C     | G    | 4.1044713857461073e-08 | 5.486296766617754  | 32184.0 |
| 17 | rs62055691          | 43754850 | T     | C    | 4.1044713857461073e-08 | 5.486296766617754  | 32184.0 |
| 17 | rs439558            | 43717803 | T     | C    | 4.1169410925656896e-08 | 5.485760611682926  | 32186.0 |
| 17 | rs62056911          | 43784624 | T     | C    | 4.118406369397058e-08  | 5.485697713184396  | 32169.0 |
| 17 | rs62054761          | 43909008 | C     | T    | 4.127579494575778e-08  | 5.485304439894855  | 32004.0 |
| 17 | rs191247549         | 44326105 | G     | C    | 4.129105538327725e-08  | 5.48523909706774   | 32126.0 |
| 17 | rs17689218          | 43785808 | T     | C    | 4.142292413622057e-08  | 5.484675428952448  | 32168.0 |
| 17 | rs62056916          | 43785938 | C     | T    | 4.142292413622057e-08  | 5.484675428952448  | 32168.0 |
| 17 | rs62056917          | 43786013 | G     | T    | 4.142292413622057e-08  | 5.484675428952448  | 32168.0 |
| 17 | rs62064409          | 43666431 | T     | C    | 4.146172010652132e-08  | 5.484509928228432  | 32031.0 |
| 17 | 17:44035222_GAA_G   | 44035222 | GAA   | G    | 4.149582119602732e-08  | 5.484364579467988  | 32046.0 |
| 17 | rs112972619         | 43776425 | C     | T    | 4.155979891084071e-08  | 5.484092200043572  | 31852.0 |
| 17 | 17:44078816_TA_T    | 44078816 | TA    | T    | 4.167537509517772e-08  | 5.4836011737573305 | 31993.0 |
| 17 | rs62055689          | 43754569 | G     | A    | 4.168286100130112e-08  | 5.483569415374904  | 32183.0 |
| 17 | rs112637166         | 43751101 | A     | G    | 4.181826603659983e-08  | 5.482995922588413  | 32171.0 |
| 17 | 17:44195611_CA_C    | 44195611 | CA    | C    | 4.1849040813125735e-08 | 5.482865830615599  | 31957.0 |
| 17 | rs55840731          | 43769277 | C     | G    | 4.18507752632684e-08   | 5.48285850146226   | 32176.0 |
| 17 | rs643024            | 43690468 | C     | T    | 4.197816036238208e-08  | 5.482321022044027  | 32103.0 |
| 17 | rs3919455           | 43953707 | C     | T    | 4.212032256983217e-08  | 5.481723057240609  | 32033.0 |
| 17 | rs2214258           | 43953719 | G     | C    | 4.212032256983217e-08  | 5.481723057240609  | 32033.0 |
| 17 | rs62056919          | 43786698 | C     | T    | 4.217271725820815e-08  | 5.481503167308666  | 32163.0 |
| 17 | rs74398257          | 43756340 | T     | C    | 4.251293393354541e-08  | 5.480081758105996  | 32180.0 |
| 17 | rs147268270         | 44101849 | T     | TC   | 4.254420934036169e-08  | 5.479951644968195  | 31742.0 |
| 17 | rs62064423          | 43668187 | A     | G    | 4.256007590205618e-08  | 5.479885671748519  | 31990.0 |
| 17 | rs28439143          | 43987723 | G     | A    | 4.261315342896555e-08  | 5.479665148389719  | 32186.0 |
| 17 | 17:43920219_AAAG_A  | 43920219 | AAAG  | A    | 4.264376492817247e-08  | 5.479538086606801  | 32131.0 |

|    |                       |          |         |            |                        |                    |         |
|----|-----------------------|----------|---------|------------|------------------------|--------------------|---------|
| 17 | rs62056930            | 43789640 | A       | C          | 4.266865262942536e-08  | 5.479434848244572  | 32153.0 |
| 17 | rs17650872            | 44039516 | G       | T          | 4.268147018764252e-08  | 5.4793817016367665 | 32145.0 |
| 17 | rs62064418            | 43667836 | C       | A          | 4.268928043358622e-08  | 5.479349324890362  | 31759.0 |
| 17 | 17:44260931_GGAGAGA_G | 44260931 | GGAGAGA | G          | 4.27413353404337e-08   | 5.479133682048863  | 31787.0 |
| 17 | 17:44260939_GA_G      | 44260939 | GA      | G          | 4.27413353404337e-08   | 5.479133682048863  | 31787.0 |
| 17 | rs62056918            | 43786676 | T       | G          | 4.2761702315941496e-08 | 5.479049379042454  | 32164.0 |
| 17 | rs62064419            | 43667915 | T       | C          | 4.2946619323637904e-08 | 5.478285746781464  | 32006.0 |
| 17 | rs55801356            | 43837237 | A       | G          | 4.317447103219554e-08  | 5.477349183733881  | 32158.0 |
| 17 | rs1568951             | 43792895 | T       | G          | 4.3175514161612873e-08 | 5.47734490707798   | 32174.0 |
| 17 | rs1568950             | 43792896 | T       | C          | 4.3175514161612873e-08 | 5.47734490707798   | 32174.0 |
| 17 | rs150592114           | 44333331 | A       | G          | 4.327965310880003e-08  | 5.476918458263115  | 30979.0 |
| 17 | 17:43798584_CA_C      | 43798584 | CA      | C          | 4.340710172944503e-08  | 5.476397908128688  | 32148.0 |
| 17 | rs2696594             | 44220790 | A       | G          | 4.346466346195538e-08  | 5.476163289038521  | 31802.0 |
| 17 | rs62064415            | 43667537 | C       | T          | 4.364397191563788e-08  | 5.475434361689466  | 31662.0 |
| 17 | rs2902661             | 43807099 | G       | A          | 4.412045088701528e-08  | 5.473511390894092  | 32148.0 |
| 17 | rs17687462            | 43744990 | C       | T          | 4.4309897692307736e-08 | 5.4727524113866615 | 32177.0 |
| 17 | rs56328224            | 43572419 | C       | T          | 4.431387206882576e-08  | 5.472736522583146  | 32026.0 |
| 17 | rs62053939            | 43740856 | C       | T          | 4.446807164251538e-08  | 5.4721211261583775 | 32186.0 |
| 17 | 17:43733707_GC_G      | 43733707 | GC      | G          | 4.453883873954013e-08  | 5.471839393432158  | 32175.0 |
| 17 | rs62055752            | 43767628 | G       | A          | 4.457018952365929e-08  | 5.471714720703196  | 32173.0 |
| 17 | 17:43760759_AT_A      | 43760759 | AT      | A          | 4.4732976041531197e-08 | 5.4710687309534665 | 32130.0 |
| 17 | 17:44204299_AC_A      | 44204299 | AC      | A          | 4.484620571542011e-08  | 5.4706207414131125 | 31744.0 |
| 17 | rs17652337            | 44083323 | C       | T          | 4.485486780954675e-08  | 5.470586515285016  | 31978.0 |
| 17 | rs62073156            | 44333568 | T       | C          | 4.4857033589093564e-08 | 5.470577958742771  | 32136.0 |
| 17 | rs55946323            | 44031946 | A       | G          | 4.488241177755955e-08  | 5.47047772465789   | 32144.0 |
| 17 | rs138070769           | 43781726 | A       | AAAG<br>AG | 4.510149429803841e-08  | 5.4696147104339765 | 32125.0 |
| 17 | rs78568882            | 43784935 | C       | G          | 4.514724219225904e-08  | 5.4694350124412825 | 32157.0 |
| 17 | rs62066086            | 43688387 | A       | G          | 4.525915774430455e-08  | 5.468996150583633  | 32097.0 |
| 17 | rs62066087            | 43688579 | A       | G          | 4.525915774430455e-08  | 5.468996150583633  | 32097.0 |
| 17 | 17:43762168_CT_C      | 43762168 | CT      | C          | 4.5378854669623086e-08 | 5.468527937918856  | 32179.0 |
| 17 | rs62055698            | 43758238 | C       | T          | 4.5459347250077873e-08 | 5.468213751802933  | 32181.0 |
| 17 | rs61667602            | 43785349 | T       | C          | 4.5714113343674044e-08 | 5.467222868059473  | 32159.0 |
| 17 | rs2532309             | 44220785 | G       | A          | 4.5750847771906457e-08 | 5.46708043547786   | 31795.0 |
| 17 | rs62055889            | 43838919 | G       | A          | 4.599119910644416e-08  | 5.466151233765216  | 32150.0 |
| 17 | rs56155809            | 44119500 | C       | CTT        | 4.602037804174151e-08  | 5.466038748182516  | 31824.0 |
| 17 | 17:43814930_GCGTA_G   | 43814930 | GCGTA   | G          | 4.610611659230668e-08  | 5.465708623372866  | 32135.0 |
| 17 | rs62063266            | 44033488 | C       | T          | 4.611994464945056e-08  | 5.465655436029004  | 32125.0 |
| 17 | rs62055701            | 43758787 | G       | A          | 4.638377046783034e-08  | 5.464643623725539  | 32019.0 |
| 17 | rs62055702            | 43758790 | C       | T          | 4.638377046783034e-08  | 5.464643623725539  | 32019.0 |
| 17 | rs7502718             | 43793651 | G       | A          | 4.707730273118991e-08  | 5.462010198384951  | 32169.0 |
| 17 | rs62055886            | 43838678 | G       | A          | 4.726923999486996e-08  | 5.461288032935883  | 32114.0 |
| 17 | rs62055887            | 43838710 | T       | C          | 4.726923999486996e-08  | 5.461288032935883  | 32114.0 |
| 17 | rs34039488            | 27320232 | G       | A          | 4.7422230508020914e-08 | 5.460714437942859  | 31978.0 |
| 17 | rs112904481           | 43766494 | A       | AC         | 4.744020356224431e-08  | 5.460647170802476  | 32167.0 |
| 17 | rs2942166             | 43715427 | T       | C          | 4.7649999746248186e-08 | 5.459863795780676  | 32185.0 |
| 17 | 17:43683792_ATGG_A    | 43683792 | ATGG    | A          | 4.786400132129488e-08  | 5.45906815502009   | 32167.0 |
| 17 | rs111370985           | 43852742 | T       | C          | 4.7930481536743276e-08 | 5.458821688800632  | 32089.0 |
| 17 | rs11079721            | 43840107 | C       | A          | 4.794451496122485e-08  | 5.458769704177463  | 32117.0 |
| 17 | rs532036186           | 43959596 | CT      | C          | 4.80154039030534e-08   | 5.45850733242473   | 31650.0 |
| 17 | rs62064420            | 43667922 | G       | C          | 4.804501261146834e-08  | 5.458397856827787  | 32061.0 |
| 17 | rs568589031           | 44311099 | G       | A          | 4.806619628244283e-08  | 5.458319572191846  | 31729.0 |
| 17 | rs2532389             | 44311107 | G       | C          | 4.806619628244283e-08  | 5.458319572191846  | 31729.0 |
| 17 | rs62073222            | 44374710 | A       | G          | 4.8359899613955495e-08 | 5.4572376190285725 | 23951.0 |
| 17 | rs375647              | 43693341 | A       | G          | 4.843906169489807e-08  | 5.456947089103856  | 32128.0 |

|    |                         |          |           |       |                        |                    |         |
|----|-------------------------|----------|-----------|-------|------------------------|--------------------|---------|
| 17 | rs2141300               | 44258914 | A         | G     | 4.8449737439503776e-08 | 5.456907943659128  | 31742.0 |
| 17 | rs117365970             | 43893259 | G         | A     | 4.8755638029570635e-08 | 5.45578981578513   | 32110.0 |
| 17 | rs62064417              | 43667792 | C         | T     | 4.8940456012793466e-08 | 5.455117559806073  | 31503.0 |
| 17 | rs62063265              | 44033468 | G         | A     | 4.897315200719213e-08  | 5.4549988877965445 | 32123.0 |
| 17 | rs62063262              | 44033002 | T         | C     | 4.9018692344638335e-08 | 5.454833724413245  | 32128.0 |
| 17 | rs62057147              | 43903298 | G         | A     | 4.9356982113501856e-08 | 5.453611468056416  | 32143.0 |
| 17 | rs34097347              | 43949448 | C         | A     | 4.944897372052344e-08  | 5.453280502415764  | 31939.0 |
| 17 | rs389978                | 43717415 | A         | G     | 4.952289240128637e-08  | 5.4530149913641885 | 32182.0 |
| 17 | rs113343751             | 44333532 | C         | G     | 4.957507520864914e-08  | 5.4528277853545495 | 32143.0 |
| 17 | rs111891516             | 44198962 | T         | TA    | 4.961569905761597e-08  | 5.4526821793281295 | 32052.0 |
| 17 | rs200422537             | 44331803 | A         | ATTTT | 4.9667806688046064e-08 | 5.452495581640127  | 31892.0 |
| 17 | rs2316956               | 44162056 | T         | A     | 4.970901815494881e-08  | 5.452348137502433  | 31923.0 |
| 17 | rs62063269              | 44034833 | G         | A     | 4.9720994564540985e-08 | 5.452305311176965  | 32104.0 |
| 17 | rs2732677               | 44342123 | G         | C     | 4.97636192699658e-08   | 5.452152970989569  | 30487.0 |
| 17 | rs2532261               | 44253203 | A         | C     | 4.984314392428153e-08  | 5.451869088630539  | 31629.0 |
| 18 | rs7234875               | 73114340 | T         | C     | 5.719962038078088e-14  | 7.51433802050141   | 32186.0 |
| 18 | rs7231353               | 73109128 | A         | C     | 2.4874962193190062e-12 | 7.004003653460147  | 31869.0 |
| 18 | rs7407699               | 73110452 | G         | C     | 3.7131410785140635e-12 | 6.947690644649823  | 32029.0 |
| 18 | rs6566091               | 73107145 | A         | G     | 1.2580119089949947e-11 | 6.773387748219499  | 32011.0 |
| 18 | rs10460110              | 73105287 | T         | C     | 1.6529841541532062e-11 | 6.733791136562622  | 32019.0 |
| 18 | rs4274504               | 73102466 | T         | C     | 1.722861821551898e-11  | 6.727767273229808  | 32037.0 |
| 18 | rs11151123              | 73107776 | C         | T     | 3.1837315227321664e-11 | 6.637812189163254  | 32044.0 |
| 22 | rs2542028               | 47196524 | A         | G     | 3.0626057109556033e-12 | 6.9748209684906515 | 31938.0 |
| 22 | rs801593                | 47195050 | G         | C     | 8.481045943624013e-12  | 6.8301760991401625 | 32186.0 |
| 22 | rs801592                | 47196383 | T         | G     | 9.846628833208065e-12  | 6.808726764044822  | 32182.0 |
| 22 | rs809031                | 47191699 | A         | G     | 1.0080353444030328e-11 | 6.805350466848145  | 32111.0 |
| 22 | rs801597                | 47190735 | T         | G     | 1.1371712070918635e-11 | 6.787976559775465  | 32104.0 |
| 22 | rs710119                | 47199148 | A         | G     | 2.0987560288025753e-11 | 6.698982583455219  | 32029.0 |
| 22 | rs710122                | 47198055 | G         | A     | 2.3010809873499833e-11 | 6.6855187223354395 | 32099.0 |
| 22 | rs910868                | 47198932 | C         | G     | 6.802133167180513e-11  | 6.5249563697014015 | 31887.0 |
| 22 | rs910867                | 47198930 | T         | A     | 7.45428869124417e-11   | 6.5112199734893705 | 31892.0 |
| 22 | rs801652                | 47202691 | C         | T     | 9.809235692532744e-11  | 6.469862160141076  | 31944.0 |
| 22 | rs801656                | 47201690 | A         | G     | 1.1916106927980164e-10 | 6.4403974202827134 | 31548.0 |
| 22 | rs4823877               | 47200353 | T         | C     | 1.2204880708498223e-10 | 6.436762336726692  | 31496.0 |
| 22 | rs4823878               | 47200354 | T         | C     | 1.5181624236894216e-10 | 6.4035388087640355 | 31482.0 |
| 22 | rs910865                | 47198133 | G         | C     | 2.631400757667044e-10  | 6.319071170837108  | 31919.0 |
| 22 | rs17822045              | 47208009 | C         | T     | 2.6328342883298037e-10 | 6.318986995635189  | 31913.0 |
| 22 | rs62233790              | 47206644 | A         | G     | 3.460402905686263e-10  | 6.2766074420229065 | 31910.0 |
| 22 | rs710118                | 47199389 | G         | C     | 3.8948464124822953e-10 | 6.258184596646344  | 31748.0 |
| 22 | 22:47168498_CATATACAT_C | 47168498 | CATATACAT | C     | 1.5683446648449386e-09 | 6.037176177246598  | 30616.0 |
| 22 | rs139577                | 47208945 | G         | A     | 4.892453819870287e-09  | 5.850789401327728  | 31282.0 |
| 22 | rs145865429             | 47206351 | A         | AT    | 1.9613525990791032e-08 | 5.615376009043104  | 29117.0 |

| CHR       | SNP               | BP              | A1       | A2       | P value                     | Z-stat                    | N             |
|-----------|-------------------|-----------------|----------|----------|-----------------------------|---------------------------|---------------|
| <b>10</b> | <b>rs11187838</b> | <b>96038686</b> | <b>G</b> | <b>A</b> | <b>0.029236832632864824</b> | <b>2.180278380453736</b>  | <b>4734.0</b> |
| 10        | rs11146399        | 134308479       | C        | T        | 0.28794094063036857         | 1.0626494769648172        | 4682.0        |
| 3         | rs67851870        | 17554860        | A        | G        | 0.3508043494236116          | 0.9330302511281164        | 4710.0        |
| <b>3</b>  | <b>rs35124509</b> | <b>89521693</b> | <b>T</b> | <b>C</b> | <b>0.003255078387998134</b> | <b>2.9425627224280984</b> | <b>4754.0</b> |
| 3         | rs62266110        | 93537923        | G        | A        | 0.9361934712998444          | 0.08005505195419887       | 4652.0        |
| 3         | rs2279829         | 147106319       | C        | T        | 0.6847156850862024          | 0.40603663165285736       | 4682.0        |
| 6         | rs4262195         | 96929475        | T        | C        | 0.7098970843773096          | 0.3719943119238445        | 4749.0        |
| <b>15</b> | <b>rs1440802</b>  | <b>39635124</b> | <b>T</b> | <b>C</b> | <b>0.009584804947221632</b> | <b>2.590458959618914</b>  | <b>4692.0</b> |
| 15        | rs4702            | 91426560        | G        | A        | 0.4220213678843896          | 0.8029193209635919        | 4754.0        |
| 2         | rs62141276        | 48214217        | G        | A        | 0.27258732810218            | 1.0971236842802248        | 4563.0        |
| 2         | rs2717046         | 58041936        | C        | T        | 0.9522042271394622          | 0.059938988788391635      | 4680.0        |
| 2         | rs62158166        | 114077218       | G        | C        | 0.3888361442755477          | 0.8617299430041099        | 4642.0        |
| 18        | rs7234875         | 73114340        | T        | C        | 0.8250427443389228          | 0.2210638154437743        | 4754.0        |
| 5         | rs145120402       | 93174765        | A        | C        | 0.10257126040076994         | 1.632513958457583         | 4744.0        |
| 5         | 5:94068140_AC_A   | 94068140        | AC       | A        | 0.30022036800097285         | 1.0359609344902436        | 4694.0        |
| 14        | rs186347          | 59072226        | G        | T        | 0.9203976014436072          | 0.0999328939702151        | 4629.0        |
| 22        | rs2542028         | 47196524        | A        | G        | 0.6040247767444131          | 0.5186214087336436        | 4729.0        |
| 11        | rs11218557        | 122099839       | T        | C        | 0.7774024921231244          | 0.2827056404346454        | 4651.0        |
| 17        | rs34039488        | 27320232        | G        | A        | 0.4619048505517788          | 0.7357138640842442        | 4706.0        |
| 17        | 17:44270659_G_A   | 44270659        | G        | A        | 0.4504527168736029          | 0.7546604931459203        | 4551.0        |

| Genomic Locus | Lead SNP   | chr | Functional category | Non effect allele | Effect allele | MAF     | mvGWAS value | P | Nearest gene | pheno_label     | univariate value | P | Beta        | univariate Z value |
|---------------|------------|-----|---------------------|-------------------|---------------|---------|--------------|---|--------------|-----------------|------------------|---|-------------|--------------------|
| 5             | rs35124509 | 3   | exonic              | C                 | T             | 0.4018  | 8,9515E-59   |   | EPHA3        | Pole_STSp       | 1,4963E-15       |   | -6,4371E-02 | -7,98              |
|               |            |     |                     |                   |               |         |              |   |              | Pole_T2ml       | 5,9579E-15       |   | 6,2982E-02  | 7,80               |
|               |            |     |                     |                   |               |         |              |   |              | AG_F3orb        | 4,0019E-13       |   | 5,8557E-02  | 7,26               |
|               |            |     |                     |                   |               |         |              |   |              | T1a_STSp        | 1,8916E-11       |   | -5,4194E-02 | -6,71              |
|               |            |     |                     |                   |               |         |              |   |              | STSp_F3orb      | 2,0435E-11       |   | -5,4103E-02 | -6,70              |
|               |            |     |                     |                   |               |         |              |   |              | SMG_T3p         | 1,0825E-09       |   | 4,9217E-02  | 6,10               |
|               |            |     |                     |                   |               |         |              |   |              | AG_STSp         | 2,0124E-09       |   | 4,8411E-02  | 6,00               |
|               |            |     |                     |                   |               |         |              |   |              | F2p_AG          | 6,6439E-09       |   | 4,6821E-02  | 5,80               |
|               |            |     |                     |                   |               |         |              |   |              | T2ml_SMG        | 2,7656E-08       |   | -4,4853E-02 | -5,56              |
| 11            | rs11187838 | 10  | intronic            | A                 | G             | 0.4354  | 4,2917E-14   |   | PLCE1        | RoIS_PrecR      | 1,8523E-07       |   | -4,1372E-02 | -5,21              |
|               |            |     |                     |                   |               |         |              |   |              | T1a_T1a/HeschIR | 9,6142E-06       |   | -3,5124E-02 | -4,43              |
| 15            | rs1440802  | 15  | NcRNA intronic      | C                 | T             | 0.09091 | 1,0033E-31   |   | RP11-624L4.1 | Prec_F3opd      | 2,7889E-19       |   | -1,2300E-01 | -8,98              |
|               |            |     |                     |                   |               |         |              |   |              | RoIS_PrecR      | 8,4664E-17       |   | -1,1409E-01 | -8,32              |



Note: Bold phenotypes represents pair of FCs with significant genetic correlation after false discovery rate correction at  $p < 0.05$ .

| Phenotype 1       | Phenotype 2       | P value         | rG            | SE           | FDR             |
|-------------------|-------------------|-----------------|---------------|--------------|-----------------|
| <b>T1a_STSp</b>   | <b>Pole_STSp</b>  | <b>2.29E-05</b> | <b>54.8%</b>  | <b>0.132</b> | <b>0.000847</b> |
| <b>SMG_T3p</b>    | <b>AG_STSp</b>    | <b>9.78E-05</b> | <b>65.6%</b>  | <b>0.192</b> | <b>0.00181</b>  |
| <b>STSp_F3orb</b> | <b>Pole_STSp</b>  | <b>0.000221</b> | <b>40.4%</b>  | <b>0.111</b> | <b>0.00272</b>  |
| <b>AG_F3orb</b>   | <b>T2ml_SMG</b>   | <b>0.00101</b>  | <b>-46.9%</b> | <b>0.158</b> | <b>0.00939</b>  |
| <b>AG_F3orb</b>   | <b>SMG_T3p</b>    | <b>0.00376</b>  | <b>53.6%</b>  | <b>0.211</b> | <b>0.0139</b>   |
| <b>Pole_T2ml</b>  | <b>STSp_F3orb</b> | <b>0.00325</b>  | <b>-31.4%</b> | <b>0.113</b> | <b>0.0139</b>   |
| <b>AG_F3orb</b>   | <b>T1a_STSp</b>   | <b>0.00284</b>  | <b>-52.5%</b> | <b>0.196</b> | <b>0.0139</b>   |
| <b>Pole_T2ml</b>  | <b>AG_STSp</b>    | <b>0.00285</b>  | <b>36.2%</b>  | <b>0.132</b> | <b>0.0139</b>   |
| <b>Pole_T2ml</b>  | <b>T2ml_SMG</b>   | <b>0.00252</b>  | <b>-30.5%</b> | <b>0.109</b> | <b>0.0139</b>   |
| <b>Pole_T2ml</b>  | <b>Pole_STSp</b>  | <b>0.00353</b>  | <b>-28.7%</b> | <b>0.099</b> | <b>0.0139</b>   |
| <b>AG_F3orb</b>   | <b>Pole_STSp</b>  | <b>0.00634</b>  | <b>-36.5%</b> | <b>0.15</b>  | <b>0.018</b>    |
| <b>Pole_T2ml</b>  | <b>SMG_T3p</b>    | <b>0.00681</b>  | <b>35.1%</b>  | <b>0.146</b> | <b>0.018</b>    |
| <b>F2p_AG</b>     | <b>AG_STSp</b>    | <b>0.00639</b>  | <b>54.5%</b>  | <b>0.25</b>  | <b>0.018</b>    |
| <b>SMG_T3p</b>    | <b>STSp_F3orb</b> | <b>0.00553</b>  | <b>-39.6%</b> | <b>0.16</b>  | <b>0.018</b>    |
| <b>F2p_AG</b>     | <b>T1a_STSp</b>   | <b>0.0107</b>   | <b>-51.2%</b> | <b>0.225</b> | <b>0.0258</b>   |
| <b>AG_F3orb</b>   | <b>STSp_F3orb</b> | <b>0.0112</b>   | <b>-38.2%</b> | <b>0.142</b> | <b>0.0258</b>   |
| <b>T1a_STSp</b>   | <b>STSp_F3orb</b> | <b>0.0121</b>   | <b>32.9%</b>  | <b>0.153</b> | <b>0.0263</b>   |
| <b>AG_F3orb</b>   | <b>F2p_AG</b>     | <b>0.0139</b>   | <b>53.5%</b>  | <b>0.243</b> | <b>0.0285</b>   |
| <b>Pole_STSp</b>  | <b>T2ml_SMG</b>   | <b>0.0168</b>   | <b>22.9%</b>  | <b>0.109</b> | <b>0.0316</b>   |
| <b>T1a_STSp</b>   | <b>SMG_T3p</b>    | <b>0.0171</b>   | <b>-38.3%</b> | <b>0.187</b> | <b>0.0316</b>   |
| <b>F2p_AG</b>     | <b>T2ml_SMG</b>   | <b>0.024</b>    | <b>-34.9%</b> | <b>0.18</b>  | <b>0.0404</b>   |
| <b>SMG_T3p</b>    | <b>T2ml_SMG</b>   | <b>0.0233</b>   | <b>-29.0%</b> | <b>0.144</b> | <b>0.0404</b>   |
| STSp_F3orb        | T2ml_SMG          | 0.0398          | 20.7%         | 0.12         | 0.064           |
| AG_STSp           | T2ml_SMG          | 0.0484          | -22.3%        | 0.137        | 0.0746          |
| T1a_STSp          | T2ml_SMG          | 0.056           | 21.9%         | 0.137        | 0.0828          |
| SMG_T3p           | Pole_STSp         | 0.0605          | -21.8%        | 0.142        | 0.0861          |
| AG_STSp           | Pole_STSp         | 0.0706          | -19.3%        | 0.127        | 0.0968          |
| AG_STSp           | STSp_F3orb        | 0.0866          | -19.6%        | 0.139        | 0.114           |
| F2p_AG            | SMG_T3p           | 0.0902          | 31.1%         | 0.232        | 0.115           |
| Prec_F3opd        | RoIS_PrecR        | 0.098           | 16.9%         | 0.131        | 0.121           |
| Pole_T2ml         | T1a_STSp          | 0.108           | -16.6%        | 0.135        | 0.129           |
| AG_F3orb          | AG_STSp           | 0.191           | 16.0%         | 0.184        | 0.221           |
| F2p_AG            | Pole_STSp         | 0.208           | 14.0%         | 0.176        | 0.233           |
| Pole_T2ml         | F2p_AG            | 0.215           | -13.7%        | 0.176        | 0.234           |
| T1a_STSp          | AG_STSp           | 0.222           | -12.8%        | 0.164        | 0.234           |
| F2p_AG            | STSp_F3orb        | 0.388           | 5.4%          | 0.189        | 0.399           |
| Pole_T2ml         | AG_F3orb          | 0.456           | 1.6%          | 0.148        | 0.456           |

**Note:** Bold phenotypes represents tracts significantly associated with the lead SNP after Bonferroni correction ( $p=6.94e-4$  ( $0.05/(3*9+5*9)$ ))

| CHR           | SNP         | Pheno                                     | Metric            | Beta               | P                 | Z               |
|---------------|-------------|-------------------------------------------|-------------------|--------------------|-------------------|-----------------|
| 15            | rs1440802   | Corpus callosum                           | L3                | -3,4428E-02        | 1,2803E-02        | -2,4892         |
|               |             |                                           | ISOVF             | -3,3499E-02        | 1,5433E-02        | -2,4221         |
|               |             |                                           | FA                | 3,2574E-02         | 1,8515E-02        | 2,3551          |
|               |             |                                           | MD                | -3,2090E-02        | 2,0335E-02        | -2,3201         |
|               |             |                                           | L2                | -3,1503E-02        | 2,2745E-02        | -2,2777         |
|               |             |                                           | L1                | -2,4891E-02        | 7,1920E-02        | -1,7996         |
|               |             |                                           | ICVF              | 2,0728E-02         | 1,3398E-01        | 1,4986          |
|               |             |                                           | MO                | -7,1922E-03        | 6,0309E-01        | -0,5200         |
|               |             |                                           | OD                | -7,1261E-03        | 6,0642E-01        | -0,5152         |
|               |             | Frontal Aslant Tract Left                 | <b>MO</b>         | <b>-6,4280E-02</b> | <b>3,3396E-06</b> | <b>-4,6487</b>  |
|               |             |                                           | OD                | 5,6007E-02         | 5,1196E-05        | 4,0501          |
|               |             |                                           | L1                | -5,4971E-02        | 7,0339E-05        | -3,9751         |
|               |             |                                           | ISOVF             | -3,4517E-02        | 1,2573E-02        | -2,4956         |
|               |             |                                           | MD                | -3,0007E-02        | 3,0042E-02        | -2,1695         |
|               |             |                                           | L3                | -1,9929E-02        | 1,4963E-01        | -1,4408         |
|               |             |                                           | ICVF              | 9,3029E-03         | 5,0123E-01        | 0,6726          |
|               |             |                                           | FA                | -8,9362E-03        | 5,1825E-01        | -0,6460         |
|               |             |                                           | L2                | -3,8335E-03        | 7,8167E-01        | -0,2771         |
|               |             | Arcuate Anterior Segment Left             | <b>OD</b>         | <b>-2,3504E-01</b> | <b>2,4732E-65</b> | <b>-17,0702</b> |
|               |             |                                           | MO                | 2,0941E-01         | 3,8548E-52        | 15,1943         |
|               |             |                                           | FA                | 1,4842E-01         | 5,9537E-27        | 10,7496         |
|               |             |                                           | L2                | -1,4630E-01        | 3,1250E-26        | -10,5956        |
|               |             |                                           | L1                | 1,0825E-01         | 4,7482E-15        | 7,8334          |
|               |             |                                           | L3                | -4,8700E-02        | 4,2921E-04        | -3,5214         |
|               |             |                                           | ISOVF             | -4,6469E-02        | 7,7922E-04        | -3,3601         |
|               |             |                                           | MD                | -3,2275E-02        | 1,9622E-02        | -2,3335         |
|               |             |                                           | ICVF              | 1,8871E-02         | 1,7246E-01        | 1,3644          |
|               |             | Inferior Fronto Occipital fasciculus Left | <b>MO</b>         | <b>4,1907E-02</b>  | <b>2,4978E-07</b> | <b>5,1579</b>   |
|               |             |                                           | OD                | -3,2217E-02        | 7,3529E-05        | -3,9646         |
|               |             |                                           | L1                | 2,0604E-02         | 1,1242E-02        | 2,5351          |
|               |             |                                           | FA                | 1,1022E-02         | 1,7507E-01        | 1,3561          |
|               |             |                                           | MD                | 8,8824E-03         | 2,7448E-01        | 1,0928          |
|               |             |                                           | ISOVF             | 4,8581E-03         | 5,5004E-01        | 0,5977          |
| L2            | -4,7179E-03 |                                           | 5,6162E-01        | -0,5804            |                   |                 |
| L3            | 4,6885E-03  |                                           | 5,6406E-01        | 0,5768             |                   |                 |
| ICVF          | -3,7015E-03 |                                           | 6,4883E-01        | -0,4554            |                   |                 |
| Uncinate Left | <b>MO</b>   | <b>4,2154E-02</b>                         | <b>2,1220E-07</b> | <b>5,1883</b>      |                   |                 |
|               | OD          | -2,3885E-02                               | 3,2932E-03        | -2,9390            |                   |                 |
|               | L1          | 2,2805E-02                                | 5,0163E-03        | 2,8060             |                   |                 |
|               | FA          | 1,2425E-02                                | 1,2634E-01        | 1,5287             |                   |                 |
|               | MD          | 9,7547E-03                                | 2,3009E-01        | 1,2001             |                   |                 |
|               | ICVF        | -8,3742E-03                               | 3,0287E-01        | -1,0303            |                   |                 |
|               | L3          | 7,2253E-03                                | 3,7404E-01        | 0,8889             |                   |                 |
|               | L2          | -5,9861E-03                               | 4,6144E-01        | -0,7365            |                   |                 |
|               | ISOVF       | -1,5708E-04                               | 9,8458E-01        | -0,0193            |                   |                 |

|   |            |                                |           |                    |                   |                |
|---|------------|--------------------------------|-----------|--------------------|-------------------|----------------|
| 3 | rs35124509 | Arcuate Anterior Segment Left  | MO        | -2,3605E-02        | 3,6791E-03        | -2,9044        |
|   |            |                                | L2        | 2,2630E-02         | 5,3612E-03        | 2,7845         |
|   |            |                                | FA        | -1,6705E-02        | 3,9844E-02        | -2,0554        |
|   |            |                                | ISOVF     | 1,2345E-02         | 1,2880E-01        | 1,5189         |
|   |            |                                | MD        | 1,0160E-02         | 2,1131E-01        | 1,2500         |
|   |            |                                | ICVF      | -1,0146E-02        | 2,1193E-01        | -1,2483        |
|   |            |                                | L3        | 7,1300E-03         | 3,8037E-01        | 0,8772         |
|   |            |                                | OD        | 5,8026E-03         | 4,7529E-01        | 0,7139         |
|   |            |                                | L1        | -7,7840E-04        | 9,2371E-01        | -0,0958        |
|   |            | Arcuate Long Segment Left      | <b>OD</b> | <b>-3,6813E-02</b> | <b>5,8822E-06</b> | <b>-4,5306</b> |
|   |            |                                | L1        | 2,0134E-02         | 1,3239E-02        | 2,4773         |
|   |            |                                | MO        | 1,4725E-02         | 7,0039E-02        | 1,8117         |
|   |            |                                | MD        | 1,2833E-02         | 1,1437E-01        | 1,5788         |
|   |            |                                | ISOVF     | 1,2218E-02         | 1,3278E-01        | 1,5032         |
|   |            |                                | L3        | 7,4946E-03         | 3,5649E-01        | 0,9221         |
|   |            |                                | ICVF      | -6,6475E-03        | 4,1345E-01        | -0,8178        |
|   |            |                                | FA        | 3,6834E-03         | 6,5043E-01        | 0,4532         |
|   |            |                                | L2        | 1,7721E-03         | 8,2741E-01        | 0,2180         |
|   |            | Arcuate Posterior Segment Left | <b>L3</b> | <b>4,1222E-02</b>  | <b>3,9039E-07</b> | <b>5,0736</b>  |
|   |            |                                | ICVF      | -3,8005E-02        | 2,9062E-06        | -4,6773        |
|   |            |                                | MD        | 3,6748E-02         | 6,1105E-06        | 4,5225         |
|   |            |                                | FA        | -3,6428E-02        | 7,3549E-06        | -4,4832        |
|   |            |                                | L2        | 3,0797E-02         | 1,5079E-04        | 3,7898         |
|   |            |                                | L1        | 2,1984E-02         | 6,8311E-03        | 2,7050         |
|   |            |                                | MO        | 1,6926E-02         | 3,7298E-02        | 2,0825         |
|   |            |                                | ISOVF     | 1,4388E-02         | 7,6693E-02        | 1,7702         |
|   |            |                                | OD        | 4,6444E-03         | 5,6773E-01        | 0,5714         |

| rs ID       | chr | position | Data base | tissue   | gene  | tested Allele | P value     | signed stats | FDR p value |
|-------------|-----|----------|-----------|----------|-------|---------------|-------------|--------------|-------------|
| rs73145317  | 3   | 89583712 | GTEEx/v8  | Pancreas | EPHA3 | C             | 3.35696E-11 | 0.45158      | 3.49803E-07 |
| rs73139276  | 3   | 89500196 | GTEEx/v8  | Pancreas | EPHA3 | A             | 9.15352E-11 | 0.390181     | 3.49803E-07 |
| rs73139288  | 3   | 89505327 | GTEEx/v8  | Pancreas | EPHA3 | G             | 9.30731E-11 | 0.388198     | 3.49803E-07 |
| rs73139129  | 3   | 89524562 | GTEEx/v8  | Pancreas | EPHA3 | G             | 9.30731E-11 | 0.388198     | 3.49803E-07 |
| rs972030    | 3   | 89538498 | GTEEx/v8  | Pancreas | EPHA3 | T             | 1.06317E-10 | 0.383465     | 3.49803E-07 |
| rs4857500   | 3   | 89541486 | GTEEx/v8  | Pancreas | EPHA3 | C             | 1.06317E-10 | 0.383465     | 3.49803E-07 |
| rs1512189   | 3   | 89546332 | GTEEx/v8  | Pancreas | EPHA3 | G             | 1.07905E-10 | 0.384892     | 3.49803E-07 |
| rs12629999  | 3   | 89551518 | GTEEx/v8  | Pancreas | EPHA3 | G             | 1.07905E-10 | 0.384892     | 3.49803E-07 |
| rs73146986  | 3   | 89560884 | GTEEx/v8  | Pancreas | EPHA3 | G             | 1.07905E-10 | 0.384892     | 3.49803E-07 |
| rs6784577   | 3   | 89564308 | GTEEx/v8  | Pancreas | EPHA3 | G             | 1.07905E-10 | 0.384892     | 3.49803E-07 |
| rs73145303  | 3   | 89568714 | GTEEx/v8  | Pancreas | EPHA3 | C             | 1.07905E-10 | 0.384892     | 3.49803E-07 |
| rs73139133  | 3   | 89527708 | GTEEx/v8  | Pancreas | EPHA3 | A             | 1.35747E-10 | 0.384023     | 3.49803E-07 |
| rs144317613 | 3   | 89525080 | GTEEx/v8  | Pancreas | EPHA3 | TA            | 1.49946E-10 | 0.383137     | 3.49803E-07 |
| rs73149103  | 3   | 89565651 | GTEEx/v8  | Pancreas | EPHA3 | A             | 1.5191E-10  | 0.38131      | 3.49803E-07 |
| rs73139261  | 3   | 89492406 | GTEEx/v8  | Pancreas | EPHA3 | G             | 1.57576E-10 | 0.386012     | 3.49803E-07 |
| rs12637036  | 3   | 89584170 | GTEEx/v8  | Pancreas | EPHA3 | A             | 1.7134E-10  | 0.385057     | 3.49803E-07 |
| rs56082199  | 3   | 89586973 | GTEEx/v8  | Pancreas | EPHA3 | G             | 1.7134E-10  | 0.385057     | 3.49803E-07 |
| rs73145336  | 3   | 89593317 | GTEEx/v8  | Pancreas | EPHA3 | G             | 1.7134E-10  | 0.385057     | 3.49803E-07 |
| rs1036285   | 3   | 89544061 | GTEEx/v8  | Pancreas | EPHA3 | C             | 1.81497E-10 | 0.361236     | 3.49803E-07 |
| rs17026984  | 3   | 89544978 | GTEEx/v8  | Pancreas | EPHA3 | A             | 1.81497E-10 | 0.361236     | 3.49803E-07 |
| rs111618480 | 3   | 89552134 | GTEEx/v8  | Pancreas | EPHA3 | C             | 1.81497E-10 | 0.361236     | 3.49803E-07 |
| rs2048518   | 3   | 89533905 | GTEEx/v8  | Pancreas | EPHA3 | C             | 1.83068E-10 | 0.364599     | 3.49803E-07 |
| rs2048520   | 3   | 89534248 | GTEEx/v8  | Pancreas | EPHA3 | C             | 1.83068E-10 | 0.364599     | 3.49803E-07 |
| rs2048521   | 3   | 89534253 | GTEEx/v8  | Pancreas | EPHA3 | A             | 1.83068E-10 | 0.364599     | 3.49803E-07 |
| rs73144998  | 3   | 89534592 | GTEEx/v8  | Pancreas | EPHA3 | T             | 1.83068E-10 | 0.364599     | 3.49803E-07 |
| rs73145002  | 3   | 89537618 | GTEEx/v8  | Pancreas | EPHA3 | C             | 1.83068E-10 | 0.364599     | 3.49803E-07 |
| rs56371328  | 3   | 89539124 | GTEEx/v8  | Pancreas | EPHA3 | A             | 1.83068E-10 | 0.364599     | 3.49803E-07 |
| rs4857498   | 3   | 89540977 | GTEEx/v8  | Pancreas | EPHA3 | A             | 1.83068E-10 | 0.364599     | 3.49803E-07 |
| rs4857499   | 3   | 89541330 | GTEEx/v8  | Pancreas | EPHA3 | A             | 1.83068E-10 | 0.364599     | 3.49803E-07 |
| rs2346837   | 3   | 89542599 | GTEEx/v8  | Pancreas | EPHA3 | T             | 1.83068E-10 | 0.364599     | 3.49803E-07 |
| rs12633609  | 3   | 89545727 | GTEEx/v8  | Pancreas | EPHA3 | G             | 1.83068E-10 | 0.364599     | 3.49803E-07 |
| rs1512188   | 3   | 89546183 | GTEEx/v8  | Pancreas | EPHA3 | G             | 1.83068E-10 | 0.364599     | 3.49803E-07 |
| rs73146943  | 3   | 89546728 | GTEEx/v8  | Pancreas | EPHA3 | G             | 1.83068E-10 | 0.364599     | 3.49803E-07 |
| rs12632281  | 3   | 89547621 | GTEEx/v8  | Pancreas | EPHA3 | A             | 1.83068E-10 | 0.364599     | 3.49803E-07 |
| rs73146947  | 3   | 89548135 | GTEEx/v8  | Pancreas | EPHA3 | G             | 1.83068E-10 | 0.364599     | 3.49803E-07 |
| rs73146950  | 3   | 89548243 | GTEEx/v8  | Pancreas | EPHA3 | C             | 1.83068E-10 | 0.364599     | 3.49803E-07 |
| rs1567657   | 3   | 89548519 | GTEEx/v8  | Pancreas | EPHA3 | A             | 1.83068E-10 | 0.364599     | 3.49803E-07 |
| rs1567658   | 3   | 89548606 | GTEEx/v8  | Pancreas | EPHA3 | A             | 1.83068E-10 | 0.364599     | 3.49803E-07 |
| rs73146959  | 3   | 89549970 | GTEEx/v8  | Pancreas | EPHA3 | C             | 1.83068E-10 | 0.364599     | 3.49803E-07 |
| rs73146960  | 3   | 89550445 | GTEEx/v8  | Pancreas | EPHA3 | C             | 1.83068E-10 | 0.364599     | 3.49803E-07 |
| rs112404167 | 3   | 89550630 | GTEEx/v8  | Pancreas | EPHA3 | T             | 1.83068E-10 | 0.364599     | 3.49803E-07 |
| rs12637511  | 3   | 89550844 | GTEEx/v8  | Pancreas | EPHA3 | C             | 1.83068E-10 | 0.364599     | 3.49803E-07 |
| rs73146972  | 3   | 89553348 | GTEEx/v8  | Pancreas | EPHA3 | G             | 1.83068E-10 | 0.364599     | 3.49803E-07 |
| rs17026990  | 3   | 89555257 | GTEEx/v8  | Pancreas | EPHA3 | C             | 1.83068E-10 | 0.364599     | 3.49803E-07 |
| rs73146976  | 3   | 89557065 | GTEEx/v8  | Pancreas | EPHA3 | C             | 1.83068E-10 | 0.364599     | 3.49803E-07 |
| rs1039991   | 3   | 89558311 | GTEEx/v8  | Pancreas | EPHA3 | G             | 1.83068E-10 | 0.364599     | 3.49803E-07 |
| rs73146980  | 3   | 89558578 | GTEEx/v8  | Pancreas | EPHA3 | A             | 1.83068E-10 | 0.364599     | 3.49803E-07 |
| rs73146983  | 3   | 89559082 | GTEEx/v8  | Pancreas | EPHA3 | G             | 1.83068E-10 | 0.364599     | 3.49803E-07 |
| rs138490449 | 3   | 89561661 | GTEEx/v8  | Pancreas | EPHA3 | AT            | 1.83068E-10 | 0.364599     | 3.49803E-07 |
| rs138183278 | 3   | 89564090 | GTEEx/v8  | Pancreas | EPHA3 | CT            | 1.83068E-10 | 0.364599     | 3.49803E-07 |
| rs6774870   | 3   | 89564891 | GTEEx/v8  | Pancreas | EPHA3 | T             | 1.83068E-10 | 0.364599     | 3.49803E-07 |
| rs113307255 | 3   | 89567826 | GTEEx/v8  | Pancreas | EPHA3 | C             | 1.83068E-10 | 0.364599     | 3.49803E-07 |

|                       |   |          |          |          |       |       |             |          |             |
|-----------------------|---|----------|----------|----------|-------|-------|-------------|----------|-------------|
| rs2346836             | 3 | 89498096 | GTEEx/v8 | Pancreas | EPHA3 | A     | 2.29119E-10 | 0.368817 | 3.49803E-07 |
| rs60759140            | 3 | 89499848 | GTEEx/v8 | Pancreas | EPHA3 | C     | 2.29119E-10 | 0.368817 | 3.49803E-07 |
| rs12152372            | 3 | 89500365 | GTEEx/v8 | Pancreas | EPHA3 | C     | 2.29119E-10 | 0.368817 | 3.49803E-07 |
| rs2881488             | 3 | 89500488 | GTEEx/v8 | Pancreas | EPHA3 | G     | 2.29119E-10 | 0.368817 | 3.49803E-07 |
| rs59541469            | 3 | 89501671 | GTEEx/v8 | Pancreas | EPHA3 | T     | 2.29119E-10 | 0.368817 | 3.49803E-07 |
| 3:89502123_TT<br>AG T | 3 | 89502123 | GTEEx/v8 | Pancreas | EPHA3 | T     | 2.29119E-10 | 0.368817 | 3.49803E-07 |
| rs73139290            | 3 | 89505343 | GTEEx/v8 | Pancreas | EPHA3 | A     | 2.29119E-10 | 0.368817 | 3.49803E-07 |
| rs73139296            | 3 | 89505734 | GTEEx/v8 | Pancreas | EPHA3 | T     | 2.29119E-10 | 0.368817 | 3.49803E-07 |
| rs1157608             | 3 | 89506464 | GTEEx/v8 | Pancreas | EPHA3 | G     | 2.29119E-10 | 0.368817 | 3.49803E-07 |
| rs73139302            | 3 | 89508186 | GTEEx/v8 | Pancreas | EPHA3 | G     | 2.29119E-10 | 0.368817 | 3.49803E-07 |
| rs73141104            | 3 | 89508390 | GTEEx/v8 | Pancreas | EPHA3 | T     | 2.29119E-10 | 0.368817 | 3.49803E-07 |
| rs1912965             | 3 | 89518332 | GTEEx/v8 | Pancreas | EPHA3 | G     | 2.29119E-10 | 0.368817 | 3.49803E-07 |
| rs113141104           | 3 | 89519238 | GTEEx/v8 | Pancreas | EPHA3 | T     | 2.29119E-10 | 0.368817 | 3.49803E-07 |
| rs73139105            | 3 | 89519651 | GTEEx/v8 | Pancreas | EPHA3 | C     | 2.29119E-10 | 0.368817 | 3.49803E-07 |
| rs112297761           | 3 | 89521602 | GTEEx/v8 | Pancreas | EPHA3 | TC    | 2.29119E-10 | 0.368817 | 3.49803E-07 |
| rs73139119            | 3 | 89522285 | GTEEx/v8 | Pancreas | EPHA3 | T     | 2.29119E-10 | 0.368817 | 3.49803E-07 |
| rs73139121            | 3 | 89522433 | GTEEx/v8 | Pancreas | EPHA3 | G     | 2.29119E-10 | 0.368817 | 3.49803E-07 |
| rs73139131            | 3 | 89524686 | GTEEx/v8 | Pancreas | EPHA3 | G     | 2.29119E-10 | 0.368817 | 3.49803E-07 |
| rs1512183             | 3 | 89505054 | GTEEx/v8 | Pancreas | EPHA3 | T     | 2.32543E-10 | 0.364957 | 3.49803E-07 |
| rs17026944            | 3 | 89521131 | GTEEx/v8 | Pancreas | EPHA3 | A     | 2.32543E-10 | 0.364957 | 3.49803E-07 |
| rs73139125            | 3 | 89524056 | GTEEx/v8 | Pancreas | EPHA3 | G     | 2.32543E-10 | 0.364957 | 3.49803E-07 |
| rs2048519             | 3 | 89533978 | GTEEx/v8 | Pancreas | EPHA3 | A     | 2.81579E-10 | 0.37063  | 3.49803E-07 |
| rs3762718             | 3 | 89535066 | GTEEx/v8 | Pancreas | EPHA3 | G     | 2.81579E-10 | 0.37063  | 3.49803E-07 |
| rs2196083             | 3 | 89536546 | GTEEx/v8 | Pancreas | EPHA3 | C     | 2.81579E-10 | 0.37063  | 3.49803E-07 |
| rs12634044            | 3 | 89537651 | GTEEx/v8 | Pancreas | EPHA3 | G     | 2.81579E-10 | 0.37063  | 3.49803E-07 |
| rs73146907            | 3 | 89538747 | GTEEx/v8 | Pancreas | EPHA3 | A     | 2.81579E-10 | 0.37063  | 3.49803E-07 |
| rs57902683            | 3 | 89539011 | GTEEx/v8 | Pancreas | EPHA3 | CA    | 2.81579E-10 | 0.37063  | 3.49803E-07 |
| rs55979407            | 3 | 89539275 | GTEEx/v8 | Pancreas | EPHA3 | G     | 2.81579E-10 | 0.37063  | 3.49803E-07 |
| rs113675293           | 3 | 89539536 | GTEEx/v8 | Pancreas | EPHA3 | T     | 2.81579E-10 | 0.37063  | 3.49803E-07 |
| rs73146926            | 3 | 89542293 | GTEEx/v8 | Pancreas | EPHA3 | G     | 2.81579E-10 | 0.37063  | 3.49803E-07 |
| rs4035593             | 3 | 89542601 | GTEEx/v8 | Pancreas | EPHA3 | TAA   | 2.81579E-10 | 0.37063  | 3.49803E-07 |
| rs2117136             | 3 | 89542699 | GTEEx/v8 | Pancreas | EPHA3 | G     | 2.81579E-10 | 0.37063  | 3.49803E-07 |
| rs7633599             | 3 | 89544591 | GTEEx/v8 | Pancreas | EPHA3 | A     | 2.81579E-10 | 0.37063  | 3.49803E-07 |
| rs7613315             | 3 | 89544773 | GTEEx/v8 | Pancreas | EPHA3 | C     | 2.81579E-10 | 0.37063  | 3.49803E-07 |
| rs1028012             | 3 | 89549422 | GTEEx/v8 | Pancreas | EPHA3 | T     | 2.81579E-10 | 0.37063  | 3.49803E-07 |
| rs17745025            | 3 | 89549919 | GTEEx/v8 | Pancreas | EPHA3 | C     | 2.81579E-10 | 0.37063  | 3.49803E-07 |
| rs73146961            | 3 | 89550459 | GTEEx/v8 | Pancreas | EPHA3 | C     | 2.81579E-10 | 0.37063  | 3.49803E-07 |
| rs12634697            | 3 | 89550993 | GTEEx/v8 | Pancreas | EPHA3 | A     | 2.81579E-10 | 0.37063  | 3.49803E-07 |
| rs12638168            | 3 | 89551544 | GTEEx/v8 | Pancreas | EPHA3 | C     | 2.81579E-10 | 0.37063  | 3.49803E-07 |
| rs73146970            | 3 | 89553168 | GTEEx/v8 | Pancreas | EPHA3 | G     | 2.81579E-10 | 0.37063  | 3.49803E-07 |
| rs12629758            | 3 | 89556408 | GTEEx/v8 | Pancreas | EPHA3 | G     | 2.81579E-10 | 0.37063  | 3.49803E-07 |
| rs1039990             | 3 | 89558086 | GTEEx/v8 | Pancreas | EPHA3 | A     | 2.81579E-10 | 0.37063  | 3.49803E-07 |
| rs73146988            | 3 | 89561044 | GTEEx/v8 | Pancreas | EPHA3 | C     | 2.81579E-10 | 0.37063  | 3.49803E-07 |
| rs73146992            | 3 | 89562178 | GTEEx/v8 | Pancreas | EPHA3 | G     | 2.81579E-10 | 0.37063  | 3.49803E-07 |
| rs73146995            | 3 | 89562209 | GTEEx/v8 | Pancreas | EPHA3 | C     | 2.81579E-10 | 0.37063  | 3.49803E-07 |
| rs73147002            | 3 | 89565128 | GTEEx/v8 | Pancreas | EPHA3 | G     | 2.81579E-10 | 0.37063  | 3.49803E-07 |
| rs148078210           | 3 | 89565641 | GTEEx/v8 | Pancreas | EPHA3 | GGTAT | 2.81579E-10 | 0.37063  | 3.49803E-07 |
| rs12633325            | 3 | 89566836 | GTEEx/v8 | Pancreas | EPHA3 | C     | 2.81579E-10 | 0.37063  | 3.49803E-07 |
| rs73149113            | 3 | 89567867 | GTEEx/v8 | Pancreas | EPHA3 | T     | 2.81579E-10 | 0.37063  | 3.49803E-07 |
| rs73137381            | 3 | 89458550 | GTEEx/v8 | Pancreas | EPHA3 | G     | 3.0069E-10  | 0.379833 | 3.49803E-07 |
| rs73137382            | 3 | 89461363 | GTEEx/v8 | Pancreas | EPHA3 | G     | 3.0069E-10  | 0.379833 | 3.49803E-07 |
| rs73137393            | 3 | 89471701 | GTEEx/v8 | Pancreas | EPHA3 | C     | 3.0069E-10  | 0.379833 | 3.49803E-07 |
| rs73137387            | 3 | 89464194 | GTEEx/v8 | Pancreas | EPHA3 | C     | 3.01355E-10 | 0.378092 | 3.49803E-07 |
| rs12639506            | 3 | 89480265 | GTEEx/v8 | Pancreas | EPHA3 | G     | 3.01355E-10 | 0.378092 | 3.49803E-07 |

|                         |   |          |          |          |       |                  |             |          |             |
|-------------------------|---|----------|----------|----------|-------|------------------|-------------|----------|-------------|
| rs12631313              | 3 | 89528461 | GTEEx/v8 | Pancreas | EPHA3 | T                | 3.17901E-10 | 0.363797 | 3.49803E-07 |
| rs7650466               | 3 | 89530358 | GTEEx/v8 | Pancreas | EPHA3 | T                | 3.17901E-10 | 0.363797 | 3.49803E-07 |
| rs2117138               | 3 | 89531522 | GTEEx/v8 | Pancreas | EPHA3 | G                | 3.17901E-10 | 0.363797 | 3.49803E-07 |
| rs12634269              | 3 | 89532768 | GTEEx/v8 | Pancreas | EPHA3 | C                | 3.23497E-10 | 0.359939 | 3.49803E-07 |
| rs73146965              | 3 | 89552553 | GTEEx/v8 | Pancreas | EPHA3 | G                | 3.46782E-10 | 0.359264 | 3.49803E-07 |
| rs73145304              | 3 | 89568989 | GTEEx/v8 | Pancreas | EPHA3 | T                | 3.558E-10   | 0.35898  | 3.49803E-07 |
| rs73145310              | 3 | 89578097 | GTEEx/v8 | Pancreas | EPHA3 | C                | 3.558E-10   | 0.35898  | 3.49803E-07 |
| rs73145312              | 3 | 89578575 | GTEEx/v8 | Pancreas | EPHA3 | T                | 3.558E-10   | 0.35898  | 3.49803E-07 |
| rs73145320              | 3 | 89586535 | GTEEx/v8 | Pancreas | EPHA3 | C                | 3.558E-10   | 0.35898  | 3.49803E-07 |
| rs1157607               | 3 | 89506364 | GTEEx/v8 | Pancreas | EPHA3 | T                | 4.14668E-10 | 0.372333 | 3.49803E-07 |
| rs7626735               | 3 | 89506958 | GTEEx/v8 | Pancreas | EPHA3 | A                | 4.14668E-10 | 0.372333 | 3.49803E-07 |
| rs568140553             | 3 | 89507219 | GTEEx/v8 | Pancreas | EPHA3 | CT               | 4.14668E-10 | 0.372333 | 3.49803E-07 |
| rs6795074               | 3 | 89516652 | GTEEx/v8 | Pancreas | EPHA3 | C                | 4.14668E-10 | 0.372333 | 3.49803E-07 |
| rs73141108              | 3 | 89517119 | GTEEx/v8 | Pancreas | EPHA3 | T                | 4.14668E-10 | 0.372333 | 3.49803E-07 |
| rs1912966               | 3 | 89518464 | GTEEx/v8 | Pancreas | EPHA3 | A                | 4.14668E-10 | 0.372333 | 3.49803E-07 |
| rs73139104              | 3 | 89519229 | GTEEx/v8 | Pancreas | EPHA3 | C                | 4.14668E-10 | 0.372333 | 3.49803E-07 |
| 3:89519266_GA<br>G      | 3 | 89519266 | GTEEx/v8 | Pancreas | EPHA3 | G                | 4.14668E-10 | 0.372333 | 3.49803E-07 |
| 3:89521060_CT<br>AT_C   | 3 | 89521060 | GTEEx/v8 | Pancreas | EPHA3 | C                | 4.14668E-10 | 0.372333 | 3.49803E-07 |
| rs73139110              | 3 | 89521509 | GTEEx/v8 | Pancreas | EPHA3 | A                | 4.14668E-10 | 0.372333 | 3.49803E-07 |
| rs1054750               | 3 | 89521725 | GTEEx/v8 | Pancreas | EPHA3 | C                | 4.14668E-10 | 0.372333 | 3.49803E-07 |
| rs73139115              | 3 | 89521900 | GTEEx/v8 | Pancreas | EPHA3 | T                | 4.14668E-10 | 0.372333 | 3.49803E-07 |
| rs73139117              | 3 | 89521965 | GTEEx/v8 | Pancreas | EPHA3 | G                | 4.14668E-10 | 0.372333 | 3.49803E-07 |
| rs73139118              | 3 | 89522263 | GTEEx/v8 | Pancreas | EPHA3 | T                | 4.14668E-10 | 0.372333 | 3.49803E-07 |
| rs150837250             | 3 | 89522314 | GTEEx/v8 | Pancreas | EPHA3 | AGTTAT<br>AATTAG | 4.14668E-10 | 0.372333 | 3.49803E-07 |
| rs17801380              | 3 | 89522483 | GTEEx/v8 | Pancreas | EPHA3 | T                | 4.14668E-10 | 0.372333 | 3.49803E-07 |
| rs73139127              | 3 | 89524436 | GTEEx/v8 | Pancreas | EPHA3 | A                | 4.14668E-10 | 0.372333 | 3.49803E-07 |
| rs1499780               | 3 | 89526072 | GTEEx/v8 | Pancreas | EPHA3 | C                | 4.14668E-10 | 0.372333 | 3.49803E-07 |
| rs73145305              | 3 | 89570713 | GTEEx/v8 | Pancreas | EPHA3 | T                | 4.85418E-10 | 0.370693 | 3.49803E-07 |
| 3:89571180_TA<br>GAG T  | 3 | 89571180 | GTEEx/v8 | Pancreas | EPHA3 | T                | 4.85418E-10 | 0.370693 | 3.49803E-07 |
| rs907548                | 3 | 89574852 | GTEEx/v8 | Pancreas | EPHA3 | T                | 4.85418E-10 | 0.370693 | 3.49803E-07 |
| rs73145307              | 3 | 89576040 | GTEEx/v8 | Pancreas | EPHA3 | A                | 4.85418E-10 | 0.370693 | 3.49803E-07 |
| rs73145309              | 3 | 89576389 | GTEEx/v8 | Pancreas | EPHA3 | T                | 4.85418E-10 | 0.370693 | 3.49803E-07 |
| rs73145316              | 3 | 89580407 | GTEEx/v8 | Pancreas | EPHA3 | T                | 4.85418E-10 | 0.370693 | 3.49803E-07 |
| rs73145332              | 3 | 89589327 | GTEEx/v8 | Pancreas | EPHA3 | C                | 4.85418E-10 | 0.370693 | 3.49803E-07 |
| rs112087049             | 3 | 89509550 | GTEEx/v8 | Pancreas | EPHA3 | T                | 4.96309E-10 | 0.397999 | 3.49803E-07 |
| rs73139281              | 3 | 89503890 | GTEEx/v8 | Pancreas | EPHA3 | T                | 5.01652E-10 | 0.365232 | 3.49803E-07 |
| rs73139284              | 3 | 89503958 | GTEEx/v8 | Pancreas | EPHA3 | G                | 5.01652E-10 | 0.365232 | 3.49803E-07 |
| rs73139286              | 3 | 89504295 | GTEEx/v8 | Pancreas | EPHA3 | A                | 5.01652E-10 | 0.365232 | 3.49803E-07 |
| rs73149107              | 3 | 89565849 | GTEEx/v8 | Pancreas | EPHA3 | A                | 5.51674E-10 | 0.364495 | 3.49803E-07 |
| rs73153260              | 3 | 89718078 | GTEEx/v8 | Pancreas | EPHA3 | A                | 5.52434E-10 | 0.429495 | 3.49803E-07 |
| rs73139134              | 3 | 89527709 | GTEEx/v8 | Pancreas | EPHA3 | C                | 5.82105E-10 | 0.366907 | 3.49803E-07 |
| rs73139135              | 3 | 89527937 | GTEEx/v8 | Pancreas | EPHA3 | C                | 5.82105E-10 | 0.366907 | 3.49803E-07 |
| rs73139139              | 3 | 89528313 | GTEEx/v8 | Pancreas | EPHA3 | G                | 5.82105E-10 | 0.366907 | 3.49803E-07 |
| rs12636710              | 3 | 89528477 | GTEEx/v8 | Pancreas | EPHA3 | A                | 5.82105E-10 | 0.366907 | 3.49803E-07 |
| rs3762717               | 3 | 89528948 | GTEEx/v8 | Pancreas | EPHA3 | C                | 5.82105E-10 | 0.366907 | 3.49803E-07 |
| rs73139147              | 3 | 89530347 | GTEEx/v8 | Pancreas | EPHA3 | A                | 5.82105E-10 | 0.366907 | 3.49803E-07 |
| rs73139148              | 3 | 89530956 | GTEEx/v8 | Pancreas | EPHA3 | A                | 5.82105E-10 | 0.366907 | 3.49803E-07 |
| rs12629165              | 3 | 89533017 | GTEEx/v8 | Pancreas | EPHA3 | A                | 5.82105E-10 | 0.366907 | 3.49803E-07 |
| rs752364173             | 3 | 89521820 | GTEEx/v8 | Pancreas | EPHA3 | T                | 6.57419E-10 | 0.352038 | 3.49803E-07 |
| 3:89521831_TG<br>AAAG T | 3 | 89521831 | GTEEx/v8 | Pancreas | EPHA3 | T                | 6.57419E-10 | 0.352038 | 3.49803E-07 |
| 3:89521838_TT<br>TG T   | 3 | 89521838 | GTEEx/v8 | Pancreas | EPHA3 | T                | 6.57419E-10 | 0.352038 | 3.49803E-07 |

|                                                                              |   |          |          |                  |       |   |             |           |             |
|------------------------------------------------------------------------------|---|----------|----------|------------------|-------|---|-------------|-----------|-------------|
| 3:89544326_CG<br>GTGGAAATCT<br>CCTTATTAAT<br>TGTGGGCAAG<br>AGGCAACCCA<br>T C | 3 | 89544326 | GTEEx/v8 | Pancreas         | EPHA3 | C | 7.02079E-10 | 0.363859  | 3.49803E-07 |
| rs7619303                                                                    | 3 | 89552554 | GTEEx/v8 | Pancreas         | EPHA3 | A | 7.96E-10    | 0.346987  | 3.49803E-07 |
| rs73149109                                                                   | 3 | 89567344 | GTEEx/v8 | Pancreas         | EPHA3 | A | 8.72692E-10 | 0.347768  | 3.49803E-07 |
| rs1080592                                                                    | 3 | 89567568 | GTEEx/v8 | Pancreas         | EPHA3 | C | 8.72692E-10 | 0.347768  | 3.49803E-07 |
| rs12633626                                                                   | 3 | 89744949 | GTEEx/v8 | Pancreas         | EPHA3 | A | 9.26126E-10 | 0.377684  | 3.49803E-07 |
| 3:89694510_GA<br>TA_G                                                        | 3 | 89694510 | GTEEx/v8 | Artery Tibial    | EPHA3 | G | 1.01112E-09 | -0.175842 | 7.80657E-07 |
| 3:89626776_AT<br>A                                                           | 3 | 89626776 | GTEEx/v8 | Pancreas         | EPHA3 | A | 1.1209E-09  | 0.36937   | 3.49803E-07 |
| rs73139144                                                                   | 3 | 89529177 | GTEEx/v8 | Pancreas         | EPHA3 | A | 1.27678E-09 | 0.360298  | 3.49803E-07 |
| rs12634341                                                                   | 3 | 89533031 | GTEEx/v8 | Pancreas         | EPHA3 | C | 1.33245E-09 | 0.355856  | 3.49803E-07 |
| rs2346840                                                                    | 3 | 89533267 | GTEEx/v8 | Pancreas         | EPHA3 | G | 1.33245E-09 | 0.355856  | 3.49803E-07 |
| rs73153266                                                                   | 3 | 89720111 | GTEEx/v8 | Pancreas         | EPHA3 | G | 1.69953E-09 | 0.360744  | 3.49803E-07 |
| rs66708608                                                                   | 3 | 89486373 | GTEEx/v8 | Pancreas         | EPHA3 | T | 1.80707E-09 | 0.343463  | 3.49803E-07 |
| rs73145345                                                                   | 3 | 89598696 | GTEEx/v8 | Pancreas         | EPHA3 | A | 2.0732E-09  | 0.365608  | 3.49803E-07 |
| rs111835258                                                                  | 3 | 89601496 | GTEEx/v8 | Pancreas         | EPHA3 | A | 2.0732E-09  | 0.365608  | 3.49803E-07 |
| rs73145351                                                                   | 3 | 89607237 | GTEEx/v8 | Pancreas         | EPHA3 | T | 2.0732E-09  | 0.365608  | 3.49803E-07 |
| rs73145353                                                                   | 3 | 89607824 | GTEEx/v8 | Pancreas         | EPHA3 | T | 2.0732E-09  | 0.365608  | 3.49803E-07 |
| rs73145357                                                                   | 3 | 89611766 | GTEEx/v8 | Pancreas         | EPHA3 | C | 2.0732E-09  | 0.365608  | 3.49803E-07 |
| rs819293                                                                     | 3 | 89613664 | GTEEx/v8 | Pancreas         | EPHA3 | A | 2.07428E-09 | 0.356596  | 3.49803E-07 |
| rs73153262                                                                   | 3 | 89719269 | GTEEx/v8 | Pancreas         | EPHA3 | T | 2.21545E-09 | 0.362082  | 3.49803E-07 |
| rs113288647                                                                  | 3 | 89720352 | GTEEx/v8 | Pancreas         | EPHA3 | T | 2.21545E-09 | 0.362082  | 3.49803E-07 |
| rs2069183                                                                    | 3 | 89645017 | GTEEx/v8 | Pancreas         | EPHA3 | A | 2.26183E-09 | 0.357285  | 3.49803E-07 |
| rs73153241                                                                   | 3 | 89695319 | GTEEx/v8 | Pancreas         | EPHA3 | G | 2.4658E-09  | 0.355974  | 3.49803E-07 |
| rs73153252                                                                   | 3 | 89712192 | GTEEx/v8 | Pancreas         | EPHA3 | T | 3.18359E-09 | 0.354961  | 3.49803E-07 |
| rs7617395                                                                    | 3 | 89722541 | GTEEx/v8 | Pancreas         | EPHA3 | T | 3.18359E-09 | 0.354961  | 3.49803E-07 |
| rs73153218                                                                   | 3 | 89619808 | GTEEx/v8 | Pancreas         | EPHA3 | A | 3.88508E-09 | 0.357171  | 3.49803E-07 |
| rs73153258                                                                   | 3 | 89715585 | GTEEx/v8 | Pancreas         | EPHA3 | A | 4.43857E-09 | 0.356589  | 3.49803E-07 |
| rs73137384                                                                   | 3 | 89463290 | GTEEx/v8 | Pancreas         | EPHA3 | T | 5.37938E-09 | 0.332038  | 3.49803E-07 |
| rs6773817                                                                    | 3 | 89753400 | GTEEx/v8 | Artery Tibial    | EPHA3 | A | 5.93098E-09 | -0.168368 | 7.80657E-07 |
| rs73137395                                                                   | 3 | 89478753 | GTEEx/v8 | Pancreas         | EPHA3 | C | 6.16802E-09 | 0.343206  | 3.49803E-07 |
| rs73139257                                                                   | 3 | 89482779 | GTEEx/v8 | Pancreas         | EPHA3 | G | 6.16802E-09 | 0.343206  | 3.49803E-07 |
| rs13064615                                                                   | 3 | 89799433 | GTEEx/v8 | Artery Tibial    | EPHA3 | G | 7.12193E-09 | -0.168807 | 7.80657E-07 |
| rs112149405                                                                  | 3 | 89886780 | GTEEx/v8 | Pancreas         | EPHA3 | C | 8.46419E-09 | 0.408213  | 3.49803E-07 |
| rs73153282                                                                   | 3 | 89728408 | GTEEx/v8 | Pancreas         | EPHA3 | T | 9.61374E-09 | 0.344833  | 3.49803E-07 |
| rs73151380                                                                   | 3 | 90000532 | GTEEx/v8 | Pancreas         | EPHA3 | T | 9.80386E-09 | 0.393419  | 3.49803E-07 |
| rs73153279                                                                   | 3 | 89727968 | GTEEx/v8 | Pancreas         | EPHA3 | C | 1.0246E-08  | 0.342672  | 3.49803E-07 |
| rs73153283                                                                   | 3 | 89732193 | GTEEx/v8 | Pancreas         | EPHA3 | T | 1.0246E-08  | 0.342672  | 3.49803E-07 |
| rs1284258                                                                    | 3 | 89823487 | GTEEx/v8 | Artery Tibial    | EPHA3 | T | 1.04495E-08 | -0.16652  | 7.80657E-07 |
| rs112604674                                                                  | 3 | 89989681 | GTEEx/v8 | Pancreas         | EPHA3 | T | 1.15883E-08 | 0.392034  | 3.49803E-07 |
| rs1512185                                                                    | 3 | 89473615 | GTEEx/v8 | Pancreas         | EPHA3 | A | 1.17088E-08 | 0.324867  | 3.49803E-07 |
| rs73153293                                                                   | 3 | 89756242 | GTEEx/v8 | Pancreas         | EPHA3 | T | 1.51089E-08 | 0.368874  | 3.49803E-07 |
| rs6551412                                                                    | 3 | 89496502 | GTEEx/v8 | Pancreas         | EPHA3 | A | 2.13147E-08 | 0.340301  | 3.49803E-07 |
| rs4264747                                                                    | 3 | 89882102 | GTEEx/v8 | Artery Tibial    | EPHA3 | G | 2.39483E-08 | -0.162136 | 7.80657E-07 |
| rs1879650                                                                    | 3 | 89856887 | GTEEx/v8 | Artery Tibial    | EPHA3 | T | 2.83016E-08 | -0.161113 | 7.80657E-07 |
| rs7616322                                                                    | 3 | 89493283 | GTEEx/v8 | Pancreas         | EPHA3 | T | 3.30748E-08 | 0.319057  | 3.49803E-07 |
| rs13062221                                                                   | 3 | 89778009 | GTEEx/v8 | Artery Tibial    | EPHA3 | C | 3.38194E-08 | -0.160623 | 7.80657E-07 |
| rs112407114                                                                  | 3 | 89797398 | GTEEx/v8 | Pancreas         | EPHA3 | C | 4.05413E-08 | 0.351939  | 3.49803E-07 |
| rs2196083                                                                    | 3 | 89536546 | GTEEx/v8 | Brain Cerebellum | EPHA3 | C | 5.10725E-08 | -0.379543 | 0.000131411 |
| rs2048519                                                                    | 3 | 89533978 | GTEEx/v8 | Brain Cerebellum | EPHA3 | A | 5.20018E-08 | -0.380424 | 0.000131411 |
| rs3762718                                                                    | 3 | 89535066 | GTEEx/v8 | Brain Cerebellum | EPHA3 | G | 5.20018E-08 | -0.380424 | 0.000131411 |
| rs12634044                                                                   | 3 | 89537651 | GTEEx/v8 | Brain Cerebellum | EPHA3 | G | 5.20018E-08 | -0.380424 | 0.000131411 |

|                                                              |   |          |          |                  |       |       |             |           |             |
|--------------------------------------------------------------|---|----------|----------|------------------|-------|-------|-------------|-----------|-------------|
| rs73146907                                                   | 3 | 89538747 | GTEEx/v8 | Brain Cerebellum | EPHA3 | A     | 5.20018E-08 | -0.380424 | 0.000131411 |
| rs57902683                                                   | 3 | 89539011 | GTEEx/v8 | Brain Cerebellum | EPHA3 | CA    | 5.20018E-08 | -0.380424 | 0.000131411 |
| rs55979407                                                   | 3 | 89539275 | GTEEx/v8 | Brain Cerebellum | EPHA3 | G     | 5.20018E-08 | -0.380424 | 0.000131411 |
| rs113675293                                                  | 3 | 89539536 | GTEEx/v8 | Brain Cerebellum | EPHA3 | T     | 5.20018E-08 | -0.380424 | 0.000131411 |
| rs4857500                                                    | 3 | 89541486 | GTEEx/v8 | Brain Cerebellum | EPHA3 | C     | 5.20018E-08 | -0.380424 | 0.000131411 |
| rs73146926                                                   | 3 | 89542293 | GTEEx/v8 | Brain Cerebellum | EPHA3 | G     | 5.20018E-08 | -0.380424 | 0.000131411 |
| rs4035593                                                    | 3 | 89542601 | GTEEx/v8 | Brain Cerebellum | EPHA3 | TAA   | 5.20018E-08 | -0.380424 | 0.000131411 |
| rs2117136                                                    | 3 | 89542699 | GTEEx/v8 | Brain Cerebellum | EPHA3 | G     | 5.20018E-08 | -0.380424 | 0.000131411 |
| 3:89544326_CG GTGGAAATCT CCTTATTAAT TGTGGCAAG AGGCAACCCA T C | 3 | 89544326 | GTEEx/v8 | Brain Cerebellum | EPHA3 | C     | 5.20018E-08 | -0.380424 | 0.000131411 |
| rs7633599                                                    | 3 | 89544591 | GTEEx/v8 | Brain Cerebellum | EPHA3 | A     | 5.20018E-08 | -0.380424 | 0.000131411 |
| rs7613315                                                    | 3 | 89544773 | GTEEx/v8 | Brain Cerebellum | EPHA3 | C     | 5.20018E-08 | -0.380424 | 0.000131411 |
| rs1028012                                                    | 3 | 89549422 | GTEEx/v8 | Brain Cerebellum | EPHA3 | T     | 5.20018E-08 | -0.380424 | 0.000131411 |
| rs17745025                                                   | 3 | 89549919 | GTEEx/v8 | Brain Cerebellum | EPHA3 | C     | 5.20018E-08 | -0.380424 | 0.000131411 |
| rs73146961                                                   | 3 | 89550459 | GTEEx/v8 | Brain Cerebellum | EPHA3 | C     | 5.20018E-08 | -0.380424 | 0.000131411 |
| rs12634697                                                   | 3 | 89550993 | GTEEx/v8 | Brain Cerebellum | EPHA3 | A     | 5.20018E-08 | -0.380424 | 0.000131411 |
| rs12638168                                                   | 3 | 89551544 | GTEEx/v8 | Brain Cerebellum | EPHA3 | C     | 5.20018E-08 | -0.380424 | 0.000131411 |
| rs73146970                                                   | 3 | 89553168 | GTEEx/v8 | Brain Cerebellum | EPHA3 | G     | 5.20018E-08 | -0.380424 | 0.000131411 |
| rs12629758                                                   | 3 | 89556408 | GTEEx/v8 | Brain Cerebellum | EPHA3 | G     | 5.20018E-08 | -0.380424 | 0.000131411 |
| rs1039990                                                    | 3 | 89558086 | GTEEx/v8 | Brain Cerebellum | EPHA3 | A     | 5.20018E-08 | -0.380424 | 0.000131411 |
| rs73146988                                                   | 3 | 89561044 | GTEEx/v8 | Brain Cerebellum | EPHA3 | C     | 5.20018E-08 | -0.380424 | 0.000131411 |
| rs73146992                                                   | 3 | 89562178 | GTEEx/v8 | Brain Cerebellum | EPHA3 | G     | 5.20018E-08 | -0.380424 | 0.000131411 |
| rs73146995                                                   | 3 | 89562209 | GTEEx/v8 | Brain Cerebellum | EPHA3 | C     | 5.20018E-08 | -0.380424 | 0.000131411 |
| rs73147002                                                   | 3 | 89565128 | GTEEx/v8 | Brain Cerebellum | EPHA3 | G     | 5.20018E-08 | -0.380424 | 0.000131411 |
| rs148078210                                                  | 3 | 89565641 | GTEEx/v8 | Brain Cerebellum | EPHA3 | GGTAT | 5.20018E-08 | -0.380424 | 0.000131411 |
| rs73149103                                                   | 3 | 89565651 | GTEEx/v8 | Brain Cerebellum | EPHA3 | A     | 5.20018E-08 | -0.380424 | 0.000131411 |
| rs73149107                                                   | 3 | 89565849 | GTEEx/v8 | Brain Cerebellum | EPHA3 | A     | 5.20018E-08 | -0.380424 | 0.000131411 |
| rs12633325                                                   | 3 | 89566836 | GTEEx/v8 | Brain Cerebellum | EPHA3 | C     | 5.20018E-08 | -0.380424 | 0.000131411 |
| rs73149113                                                   | 3 | 89567867 | GTEEx/v8 | Brain Cerebellum | EPHA3 | T     | 5.20018E-08 | -0.380424 | 0.000131411 |
| rs73145305                                                   | 3 | 89570713 | GTEEx/v8 | Brain Cerebellum | EPHA3 | T     | 5.20018E-08 | -0.380424 | 0.000131411 |
| 3:89571180_TA GAG T                                          | 3 | 89571180 | GTEEx/v8 | Brain Cerebellum | EPHA3 | T     | 5.20018E-08 | -0.380424 | 0.000131411 |
| rs907548                                                     | 3 | 89574852 | GTEEx/v8 | Brain Cerebellum | EPHA3 | T     | 5.20018E-08 | -0.380424 | 0.000131411 |
| rs73145307                                                   | 3 | 89576040 | GTEEx/v8 | Brain Cerebellum | EPHA3 | A     | 5.20018E-08 | -0.380424 | 0.000131411 |
| rs73145309                                                   | 3 | 89576389 | GTEEx/v8 | Brain Cerebellum | EPHA3 | T     | 5.20018E-08 | -0.380424 | 0.000131411 |
| rs73145316                                                   | 3 | 89580407 | GTEEx/v8 | Brain Cerebellum | EPHA3 | T     | 5.20018E-08 | -0.380424 | 0.000131411 |
| rs12637036                                                   | 3 | 89584170 | GTEEx/v8 | Brain Cerebellum | EPHA3 | A     | 5.20018E-08 | -0.380424 | 0.000131411 |
| rs73145332                                                   | 3 | 89589327 | GTEEx/v8 | Brain Cerebellum | EPHA3 | C     | 5.20018E-08 | -0.380424 | 0.000131411 |
| rs73145336                                                   | 3 | 89593317 | GTEEx/v8 | Brain Cerebellum | EPHA3 | G     | 5.20018E-08 | -0.380424 | 0.000131411 |
| rs2346840                                                    | 3 | 89533267 | GTEEx/v8 | Brain Cerebellum | EPHA3 | G     | 5.26884E-08 | -0.389826 | 0.000131411 |
| rs73139276                                                   | 3 | 89500196 | GTEEx/v8 | Brain Cerebellum | EPHA3 | A     | 5.55208E-08 | -0.397101 | 0.000131411 |
| rs73139288                                                   | 3 | 89505327 | GTEEx/v8 | Brain Cerebellum | EPHA3 | G     | 5.55208E-08 | -0.397101 | 0.000131411 |
| rs1157607                                                    | 3 | 89506364 | GTEEx/v8 | Brain Cerebellum | EPHA3 | T     | 5.55208E-08 | -0.397101 | 0.000131411 |



|                       |   |          |         |                  |       |                  |             |           |             |
|-----------------------|---|----------|---------|------------------|-------|------------------|-------------|-----------|-------------|
| rs7626735             | 3 | 89506958 | GTEx/v8 | Brain Cerebellum | EPHA3 | A                | 5.55208E-08 | -0.397101 | 0.000131411 |
| rs568140553           | 3 | 89507219 | GTEx/v8 | Brain Cerebellum | EPHA3 | CT               | 5.55208E-08 | -0.397101 | 0.000131411 |
| rs6795074             | 3 | 89516652 | GTEx/v8 | Brain Cerebellum | EPHA3 | C                | 5.55208E-08 | -0.397101 | 0.000131411 |
| rs73141108            | 3 | 89517119 | GTEx/v8 | Brain Cerebellum | EPHA3 | T                | 5.55208E-08 | -0.397101 | 0.000131411 |
| rs1912966             | 3 | 89518464 | GTEx/v8 | Brain Cerebellum | EPHA3 | A                | 5.55208E-08 | -0.397101 | 0.000131411 |
| rs73139104            | 3 | 89519229 | GTEx/v8 | Brain Cerebellum | EPHA3 | C                | 5.55208E-08 | -0.397101 | 0.000131411 |
| 3:89519266_GA<br>G    | 3 | 89519266 | GTEx/v8 | Brain Cerebellum | EPHA3 | G                | 5.55208E-08 | -0.397101 | 0.000131411 |
| 3:89521060_CT<br>AT C | 3 | 89521060 | GTEx/v8 | Brain Cerebellum | EPHA3 | C                | 5.55208E-08 | -0.397101 | 0.000131411 |
| rs73139110            | 3 | 89521509 | GTEx/v8 | Brain Cerebellum | EPHA3 | A                | 5.55208E-08 | -0.397101 | 0.000131411 |
| rs1054750             | 3 | 89521725 | GTEx/v8 | Brain Cerebellum | EPHA3 | C                | 5.55208E-08 | -0.397101 | 0.000131411 |
| rs73139115            | 3 | 89521900 | GTEx/v8 | Brain Cerebellum | EPHA3 | T                | 5.55208E-08 | -0.397101 | 0.000131411 |
| rs73139117            | 3 | 89521965 | GTEx/v8 | Brain Cerebellum | EPHA3 | G                | 5.55208E-08 | -0.397101 | 0.000131411 |
| rs73139118            | 3 | 89522263 | GTEx/v8 | Brain Cerebellum | EPHA3 | T                | 5.55208E-08 | -0.397101 | 0.000131411 |
| rs150837250           | 3 | 89522314 | GTEx/v8 | Brain Cerebellum | EPHA3 | AGTTAT<br>AATTAG | 5.55208E-08 | -0.397101 | 0.000131411 |
| rs17801380            | 3 | 89522483 | GTEx/v8 | Brain Cerebellum | EPHA3 | T                | 5.55208E-08 | -0.397101 | 0.000131411 |
| rs73139127            | 3 | 89524436 | GTEx/v8 | Brain Cerebellum | EPHA3 | A                | 5.55208E-08 | -0.397101 | 0.000131411 |
| rs73139129            | 3 | 89524562 | GTEx/v8 | Brain Cerebellum | EPHA3 | G                | 5.55208E-08 | -0.397101 | 0.000131411 |
| rs1499780             | 3 | 89526072 | GTEx/v8 | Brain Cerebellum | EPHA3 | C                | 5.55208E-08 | -0.397101 | 0.000131411 |
| rs73137381            | 3 | 89458550 | GTEx/v8 | Brain Cerebellum | EPHA3 | G                | 7.06753E-08 | -0.399375 | 0.000131411 |
| rs73137382            | 3 | 89461363 | GTEx/v8 | Brain Cerebellum | EPHA3 | G                | 7.06753E-08 | -0.399375 | 0.000131411 |
| rs73137387            | 3 | 89464194 | GTEx/v8 | Brain Cerebellum | EPHA3 | C                | 7.06753E-08 | -0.399375 | 0.000131411 |
| rs73137393            | 3 | 89471701 | GTEx/v8 | Brain Cerebellum | EPHA3 | C                | 7.06753E-08 | -0.399375 | 0.000131411 |
| rs12639506            | 3 | 89480265 | GTEx/v8 | Brain Cerebellum | EPHA3 | G                | 7.06753E-08 | -0.399375 | 0.000131411 |
| rs112087049           | 3 | 89509550 | GTEx/v8 | Brain Cerebellum | EPHA3 | T                | 7.14504E-08 | -0.411656 | 0.000131411 |
| rs144317613           | 3 | 89525080 | GTEx/v8 | Brain Cerebellum | EPHA3 | TA               | 7.4538E-08  | -0.396948 | 0.000131411 |
| rs1512189             | 3 | 89546332 | GTEx/v8 | Brain Cerebellum | EPHA3 | G                | 7.98666E-08 | -0.377125 | 0.000131411 |
| rs6784577             | 3 | 89564308 | GTEx/v8 | Brain Cerebellum | EPHA3 | G                | 7.98666E-08 | -0.377125 | 0.000131411 |
| rs56082199            | 3 | 89586973 | GTEx/v8 | Brain Cerebellum | EPHA3 | G                | 7.98666E-08 | -0.377125 | 0.000131411 |
| rs12629165            | 3 | 89533017 | GTEx/v8 | Brain Cerebellum | EPHA3 | A                | 8.19033E-08 | -0.386321 | 0.000131411 |
| rs12634341            | 3 | 89533031 | GTEx/v8 | Brain Cerebellum | EPHA3 | C                | 8.19033E-08 | -0.386321 | 0.000131411 |
| rs73153218            | 3 | 89619808 | GTEx/v8 | Artery Tibial    | EPHA3 | A                | 8.97526E-08 | 0.177382  | 7.80657E-07 |
| rs148078210           | 3 | 89565641 | GTEx/v8 | Artery Tibial    | EPHA3 | GGTAT            | 1.02345E-07 | 0.171217  | 7.80657E-07 |
| rs73154925            | 3 | 89859312 | GTEx/v8 | Pancreas         | EPHA3 | C                | 1.30179E-07 | 0.328276  | 3.49803E-07 |
| rs972030              | 3 | 89538498 | GTEx/v8 | Brain Cerebellum | EPHA3 | T                | 1.33265E-07 | -0.369879 | 0.000131411 |
| rs11128078            | 3 | 90030538 | GTEx/v8 | Artery Tibial    | EPHA3 | T                | 1.43479E-07 | -0.157932 | 7.80657E-07 |
| rs12634341            | 3 | 89533031 | GTEx/v8 | Artery Tibial    | EPHA3 | C                | 1.51111E-07 | 0.169578  | 7.80657E-07 |
| rs73139133            | 3 | 89527708 | GTEx/v8 | Brain Cerebellum | EPHA3 | A                | 1.51833E-07 | -0.378354 | 0.000131411 |
| rs73139134            | 3 | 89527709 | GTEx/v8 | Brain Cerebellum | EPHA3 | C                | 1.51833E-07 | -0.378354 | 0.000131411 |
| rs73139135            | 3 | 89527937 | GTEx/v8 | Brain Cerebellum | EPHA3 | C                | 1.51833E-07 | -0.378354 | 0.000131411 |
| rs73139139            | 3 | 89528313 | GTEx/v8 | Brain Cerebellum | EPHA3 | G                | 1.51833E-07 | -0.378354 | 0.000131411 |
| rs12636710            | 3 | 89528477 | GTEx/v8 | Brain Cerebellum | EPHA3 | A                | 1.51833E-07 | -0.378354 | 0.000131411 |
| rs3762717             | 3 | 89528948 | GTEx/v8 | Brain Cerebellum | EPHA3 | C                | 1.51833E-07 | -0.378354 | 0.000131411 |
| rs73139144            | 3 | 89529177 | GTEx/v8 | Brain Cerebellum | EPHA3 | A                | 1.51833E-07 | -0.378354 | 0.000131411 |
| rs73139147            | 3 | 89530347 | GTEx/v8 | Brain Cerebellum | EPHA3 | A                | 1.51833E-07 | -0.378354 | 0.000131411 |

|                                                                              |   |          |         |                  |       |     |             |           |             |
|------------------------------------------------------------------------------|---|----------|---------|------------------|-------|-----|-------------|-----------|-------------|
| rs73139148                                                                   | 3 | 89530956 | GTEX/v8 | Brain Cerebellum | EPHA3 | A   | 1.51833E-07 | -0.378354 | 0.000131411 |
| rs6551412                                                                    | 3 | 89496502 | GTEX/v8 | Brain Cerebellum | EPHA3 | A   | 1.56124E-07 | -0.387105 | 0.000131411 |
| rs819293                                                                     | 3 | 89613664 | GTEX/v8 | Artery Tibial    | EPHA3 | A   | 1.56358E-07 | 0.170458  | 7.80657E-07 |
| rs2347959                                                                    | 3 | 90039465 | GTEX/v8 | Artery Tibial    | EPHA3 | A   | 1.56916E-07 | -0.156664 | 7.80657E-07 |
| rs113165984                                                                  | 3 | 89989689 | GTEX/v8 | Pancreas         | EPHA3 | C   | 1.6939E-07  | 0.400186  | 3.49803E-07 |
| rs73146986                                                                   | 3 | 89560884 | GTEX/v8 | Brain Cerebellum | EPHA3 | G   | 1.86176E-07 | -0.371667 | 0.000131411 |
| rs12629165                                                                   | 3 | 89533017 | GTEX/v8 | Artery Tibial    | EPHA3 | A   | 2.12155E-07 | 0.17036   | 7.80657E-07 |
| rs73146907                                                                   | 3 | 89538747 | GTEX/v8 | Artery Tibial    | EPHA3 | A   | 2.33274E-07 | 0.166443  | 7.80657E-07 |
| rs57902683                                                                   | 3 | 89539011 | GTEX/v8 | Artery Tibial    | EPHA3 | CA  | 2.33274E-07 | 0.166443  | 7.80657E-07 |
| rs55979407                                                                   | 3 | 89539275 | GTEX/v8 | Artery Tibial    | EPHA3 | G   | 2.33274E-07 | 0.166443  | 7.80657E-07 |
| rs113675293                                                                  | 3 | 89539536 | GTEX/v8 | Artery Tibial    | EPHA3 | T   | 2.33274E-07 | 0.166443  | 7.80657E-07 |
| rs73146926                                                                   | 3 | 89542293 | GTEX/v8 | Artery Tibial    | EPHA3 | G   | 2.33274E-07 | 0.166443  | 7.80657E-07 |
| rs4035593                                                                    | 3 | 89542601 | GTEX/v8 | Artery Tibial    | EPHA3 | TAA | 2.33274E-07 | 0.166443  | 7.80657E-07 |
| 3:89544326_CG<br>GTGGAAATCT<br>CCTTATTAAT<br>TGTTGGCAAG<br>AGGCAACCCA<br>T C | 3 | 89544326 | GTEX/v8 | Artery Tibial    | EPHA3 | C   | 2.33274E-07 | 0.166443  | 7.80657E-07 |
| rs7633599                                                                    | 3 | 89544591 | GTEX/v8 | Artery Tibial    | EPHA3 | A   | 2.33274E-07 | 0.166443  | 7.80657E-07 |
| rs7613315                                                                    | 3 | 89544773 | GTEX/v8 | Artery Tibial    | EPHA3 | C   | 2.33274E-07 | 0.166443  | 7.80657E-07 |
| rs1028012                                                                    | 3 | 89549422 | GTEX/v8 | Artery Tibial    | EPHA3 | T   | 2.33274E-07 | 0.166443  | 7.80657E-07 |
| rs17745025                                                                   | 3 | 89549919 | GTEX/v8 | Artery Tibial    | EPHA3 | C   | 2.33274E-07 | 0.166443  | 7.80657E-07 |
| rs73146961                                                                   | 3 | 89550459 | GTEX/v8 | Artery Tibial    | EPHA3 | C   | 2.33274E-07 | 0.166443  | 7.80657E-07 |
| rs12634697                                                                   | 3 | 89550993 | GTEX/v8 | Artery Tibial    | EPHA3 | A   | 2.33274E-07 | 0.166443  | 7.80657E-07 |
| rs12638168                                                                   | 3 | 89551544 | GTEX/v8 | Artery Tibial    | EPHA3 | C   | 2.33274E-07 | 0.166443  | 7.80657E-07 |
| rs73146970                                                                   | 3 | 89553168 | GTEX/v8 | Artery Tibial    | EPHA3 | G   | 2.33274E-07 | 0.166443  | 7.80657E-07 |
| rs12629758                                                                   | 3 | 89556408 | GTEX/v8 | Artery Tibial    | EPHA3 | G   | 2.33274E-07 | 0.166443  | 7.80657E-07 |
| rs1039990                                                                    | 3 | 89558086 | GTEX/v8 | Artery Tibial    | EPHA3 | A   | 2.33274E-07 | 0.166443  | 7.80657E-07 |
| rs73146988                                                                   | 3 | 89561044 | GTEX/v8 | Artery Tibial    | EPHA3 | C   | 2.33274E-07 | 0.166443  | 7.80657E-07 |
| rs73146992                                                                   | 3 | 89562178 | GTEX/v8 | Artery Tibial    | EPHA3 | G   | 2.33274E-07 | 0.166443  | 7.80657E-07 |
| rs73146995                                                                   | 3 | 89562209 | GTEX/v8 | Artery Tibial    | EPHA3 | C   | 2.33274E-07 | 0.166443  | 7.80657E-07 |
| rs73147002                                                                   | 3 | 89565128 | GTEX/v8 | Artery Tibial    | EPHA3 | G   | 2.33274E-07 | 0.166443  | 7.80657E-07 |
| rs73149107                                                                   | 3 | 89565849 | GTEX/v8 | Artery Tibial    | EPHA3 | A   | 2.33274E-07 | 0.166443  | 7.80657E-07 |
| rs12633325                                                                   | 3 | 89566836 | GTEX/v8 | Artery Tibial    | EPHA3 | C   | 2.33274E-07 | 0.166443  | 7.80657E-07 |
| rs73149113                                                                   | 3 | 89567867 | GTEX/v8 | Artery Tibial    | EPHA3 | T   | 2.33274E-07 | 0.166443  | 7.80657E-07 |
| rs73153218                                                                   | 3 | 89619808 | GTEX/v8 | Brain Cerebellum | EPHA3 | A   | 2.3627E-07  | -0.37069  | 0.000131411 |
| rs73139261                                                                   | 3 | 89492406 | GTEX/v8 | Brain Cerebellum | EPHA3 | G   | 2.49711E-07 | -0.388801 | 0.000131411 |
| rs7632427                                                                    | 3 | 89534377 | GTEX/v8 | Brain Cerebellum | EPHA3 | C   | 2.51175E-07 | -0.326002 | 0.000131411 |
| rs12629999                                                                   | 3 | 89551518 | GTEX/v8 | Brain Cerebellum | EPHA3 | G   | 2.55552E-07 | -0.36834  | 0.000131411 |
| rs73145303                                                                   | 3 | 89568714 | GTEX/v8 | Brain Cerebellum | EPHA3 | C   | 2.55552E-07 | -0.36834  | 0.000131411 |
| rs1521806                                                                    | 3 | 90090619 | GTEX/v8 | Artery Tibial    | EPHA3 | C   | 2.55872E-07 | -0.151229 | 7.80657E-07 |
| rs2346840                                                                    | 3 | 89533267 | GTEX/v8 | Artery Tibial    | EPHA3 | G   | 2.57258E-07 | 0.166189  | 7.80657E-07 |
| rs73146986                                                                   | 3 | 89560884 | GTEX/v8 | Artery Tibial    | EPHA3 | G   | 2.62731E-07 | 0.172075  | 7.80657E-07 |
| rs2117136                                                                    | 3 | 89542699 | GTEX/v8 | Artery Tibial    | EPHA3 | G   | 2.64986E-07 | 0.165797  | 7.80657E-07 |
| rs73145305                                                                   | 3 | 89570713 | GTEX/v8 | Artery Tibial    | EPHA3 | T   | 2.73133E-07 | 0.167896  | 7.80657E-07 |
| 3:89571180_TA<br>GAG T                                                       | 3 | 89571180 | GTEX/v8 | Artery Tibial    | EPHA3 | T   | 2.73133E-07 | 0.167896  | 7.80657E-07 |
| rs907548                                                                     | 3 | 89574852 | GTEX/v8 | Artery Tibial    | EPHA3 | T   | 2.73133E-07 | 0.167896  | 7.80657E-07 |
| rs73145307                                                                   | 3 | 89576040 | GTEX/v8 | Artery Tibial    | EPHA3 | A   | 2.73133E-07 | 0.167896  | 7.80657E-07 |
| rs73145309                                                                   | 3 | 89576389 | GTEX/v8 | Artery Tibial    | EPHA3 | T   | 2.73133E-07 | 0.167896  | 7.80657E-07 |
| rs73145316                                                                   | 3 | 89580407 | GTEX/v8 | Artery Tibial    | EPHA3 | T   | 2.73133E-07 | 0.167896  | 7.80657E-07 |
| rs73145332                                                                   | 3 | 89589327 | GTEX/v8 | Artery Tibial    | EPHA3 | C   | 2.73133E-07 | 0.167896  | 7.80657E-07 |
| rs972030                                                                     | 3 | 89538498 | GTEX/v8 | Artery Tibial    | EPHA3 | T   | 2.77633E-07 | 0.169134  | 7.80657E-07 |
| rs4857500                                                                    | 3 | 89541486 | GTEX/v8 | Artery Tibial    | EPHA3 | C   | 2.77633E-07 | 0.169134  | 7.80657E-07 |

|                 |   |          |         |                  |       |   |             |           |             |
|-----------------|---|----------|---------|------------------|-------|---|-------------|-----------|-------------|
| rs9854073       | 3 | 89426589 | GTEX/v8 | Brain Cerebellum | EPHA3 | A | 2.78818E-07 | -0.344028 | 0.000131411 |
| rs9849029       | 3 | 89433059 | GTEX/v8 | Brain Cerebellum | EPHA3 | G | 2.78818E-07 | -0.344028 | 0.000131411 |
| rs73154916      | 3 | 89803713 | GTEX/v8 | Pancreas         | EPHA3 | T | 2.84441E-07 | 0.320594  | 3.49803E-07 |
| rs73139133      | 3 | 89527708 | GTEX/v8 | Artery Tibial    | EPHA3 | A | 3.03609E-07 | 0.170551  | 7.80657E-07 |
| rs3762718       | 3 | 89535066 | GTEX/v8 | Artery Tibial    | EPHA3 | G | 3.11902E-07 | 0.163772  | 7.80657E-07 |
| rs9868782       | 3 | 89384121 | GTEX/v8 | Artery Tibial    | EPHA3 | A | 3.16316E-07 | 0.159098  | 7.80657E-07 |
| rs2048519       | 3 | 89533978 | GTEX/v8 | Artery Tibial    | EPHA3 | A | 3.1845E-07  | 0.164341  | 7.80657E-07 |
| rs2196083       | 3 | 89536546 | GTEX/v8 | Artery Tibial    | EPHA3 | C | 3.1845E-07  | 0.164341  | 7.80657E-07 |
| rs12634044      | 3 | 89537651 | GTEX/v8 | Artery Tibial    | EPHA3 | G | 3.1845E-07  | 0.164341  | 7.80657E-07 |
| rs73145353      | 3 | 89607824 | GTEX/v8 | Brain Cerebellum | EPHA3 | T | 3.24758E-07 | -0.368663 | 0.000131411 |
| 3:89626776_AT_A | 3 | 89626776 | GTEX/v8 | Brain Cerebellum | EPHA3 | A | 3.24758E-07 | -0.368663 | 0.000131411 |
| rs7632502       | 3 | 89469453 | GTEX/v8 | Brain Cerebellum | EPHA3 | A | 3.25559E-07 | -0.324027 | 0.000131411 |
| rs1512189       | 3 | 89546332 | GTEX/v8 | Artery Tibial    | EPHA3 | G | 3.55683E-07 | 0.169577  | 7.80657E-07 |
| rs6784577       | 3 | 89564308 | GTEX/v8 | Artery Tibial    | EPHA3 | G | 3.55683E-07 | 0.169577  | 7.80657E-07 |
| rs73149103      | 3 | 89565651 | GTEX/v8 | Artery Tibial    | EPHA3 | A | 3.55683E-07 | 0.169577  | 7.80657E-07 |
| rs12637036      | 3 | 89584170 | GTEX/v8 | Artery Tibial    | EPHA3 | A | 3.55683E-07 | 0.169577  | 7.80657E-07 |
| rs56082199      | 3 | 89586973 | GTEX/v8 | Artery Tibial    | EPHA3 | G | 3.55683E-07 | 0.169577  | 7.80657E-07 |
| rs73145336      | 3 | 89593317 | GTEX/v8 | Artery Tibial    | EPHA3 | G | 3.55683E-07 | 0.169577  | 7.80657E-07 |
| rs73139134      | 3 | 89527709 | GTEX/v8 | Artery Tibial    | EPHA3 | C | 3.83286E-07 | 0.167029  | 7.80657E-07 |
| rs73139135      | 3 | 89527937 | GTEX/v8 | Artery Tibial    | EPHA3 | C | 3.83286E-07 | 0.167029  | 7.80657E-07 |
| rs73139139      | 3 | 89528313 | GTEX/v8 | Artery Tibial    | EPHA3 | G | 3.83286E-07 | 0.167029  | 7.80657E-07 |
| rs12636710      | 3 | 89528477 | GTEX/v8 | Artery Tibial    | EPHA3 | A | 3.83286E-07 | 0.167029  | 7.80657E-07 |
| rs3762717       | 3 | 89528948 | GTEX/v8 | Artery Tibial    | EPHA3 | C | 3.83286E-07 | 0.167029  | 7.80657E-07 |
| rs73139144      | 3 | 89529177 | GTEX/v8 | Artery Tibial    | EPHA3 | A | 3.83286E-07 | 0.167029  | 7.80657E-07 |
| rs73139147      | 3 | 89530347 | GTEX/v8 | Artery Tibial    | EPHA3 | A | 3.83286E-07 | 0.167029  | 7.80657E-07 |
| rs73139148      | 3 | 89530956 | GTEX/v8 | Artery Tibial    | EPHA3 | A | 3.83286E-07 | 0.167029  | 7.80657E-07 |
| rs34732565      | 3 | 90144346 | GTEX/v8 | Artery Tibial    | EPHA3 | A | 3.86359E-07 | -0.150768 | 7.80657E-07 |
| rs73145345      | 3 | 89598696 | GTEX/v8 | Artery Tibial    | EPHA3 | A | 4.57662E-07 | 0.168804  | 7.80657E-07 |
| rs111835258     | 3 | 89601496 | GTEX/v8 | Artery Tibial    | EPHA3 | A | 4.57662E-07 | 0.168804  | 7.80657E-07 |
| rs73145351      | 3 | 89607237 | GTEX/v8 | Artery Tibial    | EPHA3 | T | 4.57662E-07 | 0.168804  | 7.80657E-07 |
| rs73145353      | 3 | 89607824 | GTEX/v8 | Artery Tibial    | EPHA3 | T | 4.57662E-07 | 0.168804  | 7.80657E-07 |
| rs73145357      | 3 | 89611766 | GTEX/v8 | Artery Tibial    | EPHA3 | C | 4.57662E-07 | 0.168804  | 7.80657E-07 |
| rs73139288      | 3 | 89505327 | GTEX/v8 | Artery Tibial    | EPHA3 | G | 4.65482E-07 | 0.166579  | 7.80657E-07 |
| rs73146960      | 3 | 89550445 | GTEX/v8 | Brain Cerebellum | EPHA3 | C | 4.77005E-07 | -0.346034 | 0.000131411 |
| rs73145345      | 3 | 89598696 | GTEX/v8 | Brain Cerebellum | EPHA3 | A | 4.99521E-07 | -0.364614 | 0.000131411 |
| rs111835258     | 3 | 89601496 | GTEX/v8 | Brain Cerebellum | EPHA3 | A | 4.99521E-07 | -0.364614 | 0.000131411 |
| rs73145351      | 3 | 89607237 | GTEX/v8 | Brain Cerebellum | EPHA3 | T | 4.99521E-07 | -0.364614 | 0.000131411 |
| rs73145357      | 3 | 89611766 | GTEX/v8 | Brain Cerebellum | EPHA3 | C | 4.99521E-07 | -0.364614 | 0.000131411 |
| rs7633500       | 3 | 89497082 | GTEX/v8 | Brain Cerebellum | EPHA3 | A | 5.31007E-07 | -0.33354  | 0.000131411 |
| rs3792572       | 3 | 89456555 | GTEX/v8 | Brain Cerebellum | EPHA3 | A | 5.45397E-07 | -0.318779 | 0.000131411 |
| rs35968370      | 3 | 89466339 | GTEX/v8 | Brain Cerebellum | EPHA3 | T | 5.45397E-07 | -0.318779 | 0.000131411 |
| rs11921985      | 3 | 89467357 | GTEX/v8 | Brain Cerebellum | EPHA3 | G | 5.45397E-07 | -0.318779 | 0.000131411 |
| rs6782527       | 3 | 89442369 | GTEX/v8 | Pancreas         | EPHA3 | T | 5.49846E-07 | 0.301598  | 3.49803E-07 |
| rs12629999      | 3 | 89551518 | GTEX/v8 | Artery Tibial    | EPHA3 | G | 5.60355E-07 | 0.167557  | 7.80657E-07 |
| rs73145303      | 3 | 89568714 | GTEX/v8 | Artery Tibial    | EPHA3 | C | 5.60355E-07 | 0.167557  | 7.80657E-07 |
| rs35317084      | 3 | 89354462 | GTEX/v8 | Artery Tibial    | EPHA3 | T | 5.74001E-07 | -0.150164 | 7.80657E-07 |
| rs9854073       | 3 | 89426589 | GTEX/v8 | Artery Tibial    | EPHA3 | A | 6.43643E-07 | 0.155106  | 7.80657E-07 |
| rs9849029       | 3 | 89433059 | GTEX/v8 | Artery Tibial    | EPHA3 | G | 6.43643E-07 | 0.155106  | 7.80657E-07 |
| rs73139129      | 3 | 89524562 | GTEX/v8 | Artery Tibial    | EPHA3 | G | 6.47764E-07 | 0.164125  | 7.80657E-07 |
| 3:89626776_AT_A | 3 | 89626776 | GTEX/v8 | Artery Tibial    | EPHA3 | A | 7.076E-07   | 0.165047  | 7.80657E-07 |

|                                   |   |          |         |                  |       |                  |             |           |             |
|-----------------------------------|---|----------|---------|------------------|-------|------------------|-------------|-----------|-------------|
| rs73137387                        | 3 | 89464194 | GTEx/v8 | Artery Tibial    | EPHA3 | C                | 7.18472E-07 | 0.163632  | 7.80657E-07 |
| rs73153293                        | 3 | 89756242 | GTEx/v8 | Artery Tibial    | EPHA3 | T                | 7.34654E-07 | 0.172034  | 7.80657E-07 |
| rs1157607                         | 3 | 89506364 | GTEx/v8 | Artery Tibial    | EPHA3 | T                | 7.37407E-07 | 0.163625  | 7.80657E-07 |
| rs7626735                         | 3 | 89506958 | GTEx/v8 | Artery Tibial    | EPHA3 | A                | 7.41145E-07 | 0.163105  | 7.80657E-07 |
| rs6551412                         | 3 | 89496502 | GTEx/v8 | Artery Tibial    | EPHA3 | A                | 7.48723E-07 | 0.162863  | 7.80657E-07 |
| rs6772953                         | 3 | 89451721 | GTEx/v8 | Brain Cerebellum | EPHA3 | C                | 7.62522E-07 | -0.312523 | 0.000131411 |
| rs112087049                       | 3 | 89509550 | GTEx/v8 | Artery Tibial    | EPHA3 | T                | 7.66988E-07 | 0.168789  | 7.80657E-07 |
| rs73137395                        | 3 | 89478753 | GTEx/v8 | Brain Cerebellum | EPHA3 | C                | 7.73151E-07 | -0.359363 | 0.000131411 |
| rs73139257                        | 3 | 89482779 | GTEx/v8 | Brain Cerebellum | EPHA3 | G                | 7.73151E-07 | -0.359363 | 0.000131411 |
| rs73139276                        | 3 | 89500196 | GTEx/v8 | Artery Tibial    | EPHA3 | A                | 7.79111E-07 | 0.164089  | 7.80657E-07 |
| rs62276243                        | 3 | 90121534 | GTEx/v8 | Artery Tibial    | EPHA3 | T                | 9.02879E-07 | -0.145657 | 7.80657E-07 |
| rs4974357                         | 3 | 90127762 | GTEx/v8 | Artery Tibial    | EPHA3 | C                | 9.02879E-07 | -0.145657 | 7.80657E-07 |
| rs7645408                         | 3 | 89446132 | GTEx/v8 | Brain Cerebellum | EPHA3 | A                | 9.04261E-07 | -0.328249 | 0.000131411 |
| rs28623022                        | 3 | 89448936 | GTEx/v8 | Brain Cerebellum | EPHA3 | A                | 9.04261E-07 | -0.328249 | 0.000131411 |
| rs73137381                        | 3 | 89458550 | GTEx/v8 | Artery Tibial    | EPHA3 | G                | 9.14616E-07 | 0.164052  | 7.80657E-07 |
| rs73137382                        | 3 | 89461363 | GTEx/v8 | Artery Tibial    | EPHA3 | G                | 9.14616E-07 | 0.164052  | 7.80657E-07 |
| rs57670516                        | 3 | 89419645 | GTEx/v8 | Brain Cerebellum | EPHA3 | C                | 9.44625E-07 | -0.331888 | 0.000131411 |
| 3:89420088_TG<br>TGACCTAGA<br>C_T | 3 | 89420088 | GTEx/v8 | Brain Cerebellum | EPHA3 | T                | 9.44625E-07 | -0.331888 | 0.000131411 |
| rs12639506                        | 3 | 89480265 | GTEx/v8 | Artery Tibial    | EPHA3 | G                | 9.92726E-07 | 0.1612    | 7.80657E-07 |
| rs57670516                        | 3 | 89419645 | GTEx/v8 | Artery Tibial    | EPHA3 | C                | 1.00519E-06 | 0.152977  | 7.80657E-07 |
| 3:89420088_TG<br>TGACCTAGA<br>C_T | 3 | 89420088 | GTEx/v8 | Artery Tibial    | EPHA3 | T                | 1.00519E-06 | 0.152977  | 7.80657E-07 |
| rs6795074                         | 3 | 89516652 | GTEx/v8 | Artery Tibial    | EPHA3 | C                | 1.01653E-06 | 0.161217  | 7.80657E-07 |
| rs73141108                        | 3 | 89517119 | GTEx/v8 | Artery Tibial    | EPHA3 | T                | 1.01653E-06 | 0.161217  | 7.80657E-07 |
| rs1912966                         | 3 | 89518464 | GTEx/v8 | Artery Tibial    | EPHA3 | A                | 1.01653E-06 | 0.161217  | 7.80657E-07 |
| rs73139104                        | 3 | 89519229 | GTEx/v8 | Artery Tibial    | EPHA3 | C                | 1.01653E-06 | 0.161217  | 7.80657E-07 |
| 3:89519266_GA<br>G                | 3 | 89519266 | GTEx/v8 | Artery Tibial    | EPHA3 | G                | 1.01653E-06 | 0.161217  | 7.80657E-07 |
| 3:89521060_CT<br>AT_C             | 3 | 89521060 | GTEx/v8 | Artery Tibial    | EPHA3 | C                | 1.01653E-06 | 0.161217  | 7.80657E-07 |
| rs73139110                        | 3 | 89521509 | GTEx/v8 | Artery Tibial    | EPHA3 | A                | 1.01653E-06 | 0.161217  | 7.80657E-07 |
| rs1054750                         | 3 | 89521725 | GTEx/v8 | Artery Tibial    | EPHA3 | C                | 1.01653E-06 | 0.161217  | 7.80657E-07 |
| rs73139115                        | 3 | 89521900 | GTEx/v8 | Artery Tibial    | EPHA3 | T                | 1.01653E-06 | 0.161217  | 7.80657E-07 |
| rs73139117                        | 3 | 89521965 | GTEx/v8 | Artery Tibial    | EPHA3 | G                | 1.01653E-06 | 0.161217  | 7.80657E-07 |
| rs73139118                        | 3 | 89522263 | GTEx/v8 | Artery Tibial    | EPHA3 | T                | 1.01653E-06 | 0.161217  | 7.80657E-07 |
| rs150837250                       | 3 | 89522314 | GTEx/v8 | Artery Tibial    | EPHA3 | AGTTAT<br>AATTAG | 1.01653E-06 | 0.161217  | 7.80657E-07 |
| rs17801380                        | 3 | 89522483 | GTEx/v8 | Artery Tibial    | EPHA3 | T                | 1.01653E-06 | 0.161217  | 7.80657E-07 |
| rs73139127                        | 3 | 89524436 | GTEx/v8 | Artery Tibial    | EPHA3 | A                | 1.01653E-06 | 0.161217  | 7.80657E-07 |
| rs568140553                       | 3 | 89507219 | GTEx/v8 | Artery Tibial    | EPHA3 | CT               | 1.01848E-06 | 0.160739  | 7.80657E-07 |
| rs73139261                        | 3 | 89492406 | GTEx/v8 | Artery Tibial    | EPHA3 | G                | 1.0393E-06  | 0.164521  | 7.80657E-07 |
| rs1499780                         | 3 | 89526072 | GTEx/v8 | Artery Tibial    | EPHA3 | C                | 1.05303E-06 | 0.161305  | 7.80657E-07 |
| rs2048518                         | 3 | 89533905 | GTEx/v8 | Brain Cerebellum | EPHA3 | C                | 1.06295E-06 | -0.335412 | 0.000131411 |
| rs2048520                         | 3 | 89534248 | GTEx/v8 | Brain Cerebellum | EPHA3 | C                | 1.06295E-06 | -0.335412 | 0.000131411 |
| rs2048521                         | 3 | 89534253 | GTEx/v8 | Brain Cerebellum | EPHA3 | A                | 1.06295E-06 | -0.335412 | 0.000131411 |
| rs73144998                        | 3 | 89534592 | GTEx/v8 | Brain Cerebellum | EPHA3 | T                | 1.06295E-06 | -0.335412 | 0.000131411 |
| rs73145002                        | 3 | 89537618 | GTEx/v8 | Brain Cerebellum | EPHA3 | C                | 1.06295E-06 | -0.335412 | 0.000131411 |
| rs56371328                        | 3 | 89539124 | GTEx/v8 | Brain Cerebellum | EPHA3 | A                | 1.06295E-06 | -0.335412 | 0.000131411 |
| rs4857498                         | 3 | 89540977 | GTEx/v8 | Brain Cerebellum | EPHA3 | A                | 1.06295E-06 | -0.335412 | 0.000131411 |
| rs4857499                         | 3 | 89541330 | GTEx/v8 | Brain Cerebellum | EPHA3 | A                | 1.06295E-06 | -0.335412 | 0.000131411 |
| rs1036285                         | 3 | 89544061 | GTEx/v8 | Brain Cerebellum | EPHA3 | C                | 1.06295E-06 | -0.335412 | 0.000131411 |

|                   |   |          |         |                  |       |    |             |           |             |
|-------------------|---|----------|---------|------------------|-------|----|-------------|-----------|-------------|
| rs17026984        | 3 | 89544978 | GTEx/v8 | Brain Cerebellum | EPHA3 | A  | 1.06295E-06 | -0.335412 | 0.000131411 |
| rs12633609        | 3 | 89545727 | GTEx/v8 | Brain Cerebellum | EPHA3 | G  | 1.06295E-06 | -0.335412 | 0.000131411 |
| rs1512188         | 3 | 89546183 | GTEx/v8 | Brain Cerebellum | EPHA3 | G  | 1.06295E-06 | -0.335412 | 0.000131411 |
| rs73146943        | 3 | 89546728 | GTEx/v8 | Brain Cerebellum | EPHA3 | G  | 1.06295E-06 | -0.335412 | 0.000131411 |
| rs12632281        | 3 | 89547621 | GTEx/v8 | Brain Cerebellum | EPHA3 | A  | 1.06295E-06 | -0.335412 | 0.000131411 |
| rs73146947        | 3 | 89548135 | GTEx/v8 | Brain Cerebellum | EPHA3 | G  | 1.06295E-06 | -0.335412 | 0.000131411 |
| rs73146950        | 3 | 89548243 | GTEx/v8 | Brain Cerebellum | EPHA3 | C  | 1.06295E-06 | -0.335412 | 0.000131411 |
| rs1567657         | 3 | 89548519 | GTEx/v8 | Brain Cerebellum | EPHA3 | A  | 1.06295E-06 | -0.335412 | 0.000131411 |
| rs1567658         | 3 | 89548606 | GTEx/v8 | Brain Cerebellum | EPHA3 | A  | 1.06295E-06 | -0.335412 | 0.000131411 |
| rs73146959        | 3 | 89549970 | GTEx/v8 | Brain Cerebellum | EPHA3 | C  | 1.06295E-06 | -0.335412 | 0.000131411 |
| rs112404167       | 3 | 89550630 | GTEx/v8 | Brain Cerebellum | EPHA3 | T  | 1.06295E-06 | -0.335412 | 0.000131411 |
| rs12637511        | 3 | 89550844 | GTEx/v8 | Brain Cerebellum | EPHA3 | C  | 1.06295E-06 | -0.335412 | 0.000131411 |
| rs111618480       | 3 | 89552134 | GTEx/v8 | Brain Cerebellum | EPHA3 | C  | 1.06295E-06 | -0.335412 | 0.000131411 |
| rs73146972        | 3 | 89553348 | GTEx/v8 | Brain Cerebellum | EPHA3 | G  | 1.06295E-06 | -0.335412 | 0.000131411 |
| rs17026990        | 3 | 89555257 | GTEx/v8 | Brain Cerebellum | EPHA3 | C  | 1.06295E-06 | -0.335412 | 0.000131411 |
| rs73146976        | 3 | 89557065 | GTEx/v8 | Brain Cerebellum | EPHA3 | C  | 1.06295E-06 | -0.335412 | 0.000131411 |
| rs1039991         | 3 | 89558311 | GTEx/v8 | Brain Cerebellum | EPHA3 | G  | 1.06295E-06 | -0.335412 | 0.000131411 |
| rs73146980        | 3 | 89558578 | GTEx/v8 | Brain Cerebellum | EPHA3 | A  | 1.06295E-06 | -0.335412 | 0.000131411 |
| rs73146983        | 3 | 89559082 | GTEx/v8 | Brain Cerebellum | EPHA3 | G  | 1.06295E-06 | -0.335412 | 0.000131411 |
| rs138490449       | 3 | 89561661 | GTEx/v8 | Brain Cerebellum | EPHA3 | AT | 1.06295E-06 | -0.335412 | 0.000131411 |
| rs138183278       | 3 | 89564090 | GTEx/v8 | Brain Cerebellum | EPHA3 | CT | 1.06295E-06 | -0.335412 | 0.000131411 |
| rs6774870         | 3 | 89564891 | GTEx/v8 | Brain Cerebellum | EPHA3 | T  | 1.06295E-06 | -0.335412 | 0.000131411 |
| rs113307255       | 3 | 89567826 | GTEx/v8 | Brain Cerebellum | EPHA3 | C  | 1.06295E-06 | -0.335412 | 0.000131411 |
| rs73145304        | 3 | 89568989 | GTEx/v8 | Brain Cerebellum | EPHA3 | T  | 1.06295E-06 | -0.335412 | 0.000131411 |
| rs73145310        | 3 | 89578097 | GTEx/v8 | Brain Cerebellum | EPHA3 | C  | 1.06295E-06 | -0.335412 | 0.000131411 |
| rs73145312        | 3 | 89578575 | GTEx/v8 | Brain Cerebellum | EPHA3 | T  | 1.06295E-06 | -0.335412 | 0.000131411 |
| rs73145320        | 3 | 89586535 | GTEx/v8 | Brain Cerebellum | EPHA3 | C  | 1.06295E-06 | -0.335412 | 0.000131411 |
| rs67316928        | 3 | 89482234 | GTEx/v8 | Brain Cerebellum | EPHA3 | C  | 1.0649E-06  | -0.313684 | 0.000131411 |
| rs17804073        | 3 | 90124806 | GTEx/v8 | Artery Tibial    | EPHA3 | A  | 1.07195E-06 | -0.145091 | 7.80657E-07 |
| rs12636275        | 3 | 89523038 | GTEx/v8 | Brain Cerebellum | EPHA3 | A  | 1.08168E-06 | -0.311412 | 0.000131411 |
| rs73137393        | 3 | 89471701 | GTEx/v8 | Artery Tibial    | EPHA3 | C  | 1.13522E-06 | 0.162812  | 7.80657E-07 |
| rs7650184         | 3 | 89530057 | GTEx/v8 | Brain Cerebellum | EPHA3 | A  | 1.16781E-06 | -0.311417 | 0.000131411 |
| rs17738248        | 3 | 89296363 | GTEx/v8 | Artery Tibial    | EPHA3 | A  | 1.18583E-06 | 0.1608    | 7.80657E-07 |
| rs9868782         | 3 | 89384121 | GTEx/v8 | Brain Cerebellum | EPHA3 | A  | 1.19018E-06 | -0.33257  | 0.000131411 |
| rs1521800         | 3 | 90001588 | GTEx/v8 | Artery Tibial    | EPHA3 | T  | 1.24942E-06 | -0.143263 | 7.80657E-07 |
| rs73145338        | 3 | 89594767 | GTEx/v8 | Brain Cerebellum | EPHA3 | T  | 1.25465E-06 | -0.306581 | 0.000131411 |
| rs7621573         | 3 | 89595252 | GTEx/v8 | Brain Cerebellum | EPHA3 | T  | 1.25465E-06 | -0.306581 | 0.000131411 |
| rs10511145        | 3 | 89597679 | GTEx/v8 | Brain Cerebellum | EPHA3 | A  | 1.25465E-06 | -0.306581 | 0.000131411 |
| 3:89598352_GG T_G | 3 | 89598352 | GTEx/v8 | Brain Cerebellum | EPHA3 | G  | 1.25465E-06 | -0.306581 | 0.000131411 |
| rs17027018        | 3 | 89604774 | GTEx/v8 | Brain Cerebellum | EPHA3 | T  | 1.25465E-06 | -0.306581 | 0.000131411 |
| rs73153219        | 3 | 89625902 | GTEx/v8 | Brain Cerebellum | EPHA3 | T  | 1.25465E-06 | -0.306581 | 0.000131411 |
| rs7635916         | 3 | 89633140 | GTEx/v8 | Brain Cerebellum | EPHA3 | A  | 1.25465E-06 | -0.306581 | 0.000131411 |
| rs6551413         | 3 | 89640350 | GTEx/v8 | Brain Cerebellum | EPHA3 | G  | 1.25465E-06 | -0.306581 | 0.000131411 |

|                       |   |          |         |                  |       |    |             |           |             |
|-----------------------|---|----------|---------|------------------|-------|----|-------------|-----------|-------------|
| rs6795325             | 3 | 89642054 | GTEx/v8 | Brain Cerebellum | EPHA3 | C  | 1.25465E-06 | -0.306581 | 0.000131411 |
| rs66499884            | 3 | 89659012 | GTEx/v8 | Brain Cerebellum | EPHA3 | G  | 1.25465E-06 | -0.306581 | 0.000131411 |
| rs2063590             | 3 | 89323932 | GTEx/v8 | Artery Tibial    | EPHA3 | C  | 1.27188E-06 | 0.162629  | 7.80657E-07 |
| rs73151349            | 3 | 89892899 | GTEx/v8 | Pancreas         | EPHA3 | G  | 1.33186E-06 | 0.312228  | 3.49803E-07 |
| rs4396913             | 3 | 90047036 | GTEx/v8 | Artery Tibial    | EPHA3 | C  | 1.37457E-06 | 0.15249   | 7.80657E-07 |
| rs1464463             | 3 | 90056380 | GTEx/v8 | Artery Tibial    | EPHA3 | A  | 1.37457E-06 | 0.15249   | 7.80657E-07 |
| rs2346836             | 3 | 89498096 | GTEx/v8 | Brain Cerebellum | EPHA3 | A  | 1.39977E-06 | -0.345515 | 0.000131411 |
| rs60759140            | 3 | 89499848 | GTEx/v8 | Brain Cerebellum | EPHA3 | C  | 1.39977E-06 | -0.345515 | 0.000131411 |
| rs12152372            | 3 | 89500365 | GTEx/v8 | Brain Cerebellum | EPHA3 | C  | 1.39977E-06 | -0.345515 | 0.000131411 |
| rs2881488             | 3 | 89500488 | GTEx/v8 | Brain Cerebellum | EPHA3 | G  | 1.39977E-06 | -0.345515 | 0.000131411 |
| rs59541469            | 3 | 89501671 | GTEx/v8 | Brain Cerebellum | EPHA3 | T  | 1.39977E-06 | -0.345515 | 0.000131411 |
| 3:89502123_TT<br>AG T | 3 | 89502123 | GTEx/v8 | Brain Cerebellum | EPHA3 | T  | 1.39977E-06 | -0.345515 | 0.000131411 |
| rs73139281            | 3 | 89503890 | GTEx/v8 | Brain Cerebellum | EPHA3 | T  | 1.39977E-06 | -0.345515 | 0.000131411 |
| rs73139284            | 3 | 89503958 | GTEx/v8 | Brain Cerebellum | EPHA3 | G  | 1.39977E-06 | -0.345515 | 0.000131411 |
| rs73139286            | 3 | 89504295 | GTEx/v8 | Brain Cerebellum | EPHA3 | A  | 1.39977E-06 | -0.345515 | 0.000131411 |
| rs1512183             | 3 | 89505054 | GTEx/v8 | Brain Cerebellum | EPHA3 | T  | 1.39977E-06 | -0.345515 | 0.000131411 |
| rs73139290            | 3 | 89505343 | GTEx/v8 | Brain Cerebellum | EPHA3 | A  | 1.39977E-06 | -0.345515 | 0.000131411 |
| rs73139296            | 3 | 89505734 | GTEx/v8 | Brain Cerebellum | EPHA3 | T  | 1.39977E-06 | -0.345515 | 0.000131411 |
| rs1157608             | 3 | 89506464 | GTEx/v8 | Brain Cerebellum | EPHA3 | G  | 1.39977E-06 | -0.345515 | 0.000131411 |
| rs73139302            | 3 | 89508186 | GTEx/v8 | Brain Cerebellum | EPHA3 | G  | 1.39977E-06 | -0.345515 | 0.000131411 |
| rs73141104            | 3 | 89508390 | GTEx/v8 | Brain Cerebellum | EPHA3 | T  | 1.39977E-06 | -0.345515 | 0.000131411 |
| rs1912965             | 3 | 89518332 | GTEx/v8 | Brain Cerebellum | EPHA3 | G  | 1.39977E-06 | -0.345515 | 0.000131411 |
| rs113141104           | 3 | 89519238 | GTEx/v8 | Brain Cerebellum | EPHA3 | T  | 1.39977E-06 | -0.345515 | 0.000131411 |
| rs73139105            | 3 | 89519651 | GTEx/v8 | Brain Cerebellum | EPHA3 | C  | 1.39977E-06 | -0.345515 | 0.000131411 |
| rs17026944            | 3 | 89521131 | GTEx/v8 | Brain Cerebellum | EPHA3 | A  | 1.39977E-06 | -0.345515 | 0.000131411 |
| rs112297761           | 3 | 89521602 | GTEx/v8 | Brain Cerebellum | EPHA3 | TC | 1.39977E-06 | -0.345515 | 0.000131411 |
| rs73139119            | 3 | 89522285 | GTEx/v8 | Brain Cerebellum | EPHA3 | T  | 1.39977E-06 | -0.345515 | 0.000131411 |
| rs73139121            | 3 | 89522433 | GTEx/v8 | Brain Cerebellum | EPHA3 | G  | 1.39977E-06 | -0.345515 | 0.000131411 |
| rs73139125            | 3 | 89524056 | GTEx/v8 | Brain Cerebellum | EPHA3 | G  | 1.39977E-06 | -0.345515 | 0.000131411 |
| rs73139131            | 3 | 89524686 | GTEx/v8 | Brain Cerebellum | EPHA3 | G  | 1.39977E-06 | -0.345515 | 0.000131411 |
| rs9877921             | 3 | 90108491 | GTEx/v8 | Artery Tibial    | EPHA3 | T  | 1.40136E-06 | 0.152782  | 7.80657E-07 |
| rs62276239            | 3 | 90077991 | GTEx/v8 | Artery Tibial    | EPHA3 | T  | 1.40499E-06 | 0.158179  | 7.80657E-07 |
| rs55889178            | 3 | 90078249 | GTEx/v8 | Artery Tibial    | EPHA3 | A  | 1.40499E-06 | 0.158179  | 7.80657E-07 |
| rs1520596             | 3 | 89645542 | GTEx/v8 | Brain Cerebellum | EPHA3 | C  | 1.45459E-06 | -0.299389 | 0.000131411 |
| rs73146965            | 3 | 89552553 | GTEx/v8 | Brain Cerebellum | EPHA3 | G  | 1.4669E-06  | -0.331695 | 0.000131411 |
| rs35124509            | 3 | 89521693 | GTEx/v8 | Brain Cerebellum | EPHA3 | C  | 1.48256E-06 | -0.305957 | 0.000131411 |
| rs62274981            | 3 | 89310605 | GTEx/v8 | Brain Cerebellum | EPHA3 | T  | 1.48407E-06 | -0.326947 | 0.000131411 |
| rs17800347            | 3 | 89314429 | GTEx/v8 | Brain Cerebellum | EPHA3 | G  | 1.48407E-06 | -0.326947 | 0.000131411 |
| rs993186              | 3 | 89314862 | GTEx/v8 | Brain Cerebellum | EPHA3 | G  | 1.48407E-06 | -0.326947 | 0.000131411 |
| rs1567731             | 3 | 89316027 | GTEx/v8 | Brain Cerebellum | EPHA3 | T  | 1.48407E-06 | -0.326947 | 0.000131411 |
| rs17800551            | 3 | 89317315 | GTEx/v8 | Brain Cerebellum | EPHA3 | T  | 1.48407E-06 | -0.326947 | 0.000131411 |
| rs62274984            | 3 | 89318317 | GTEx/v8 | Brain Cerebellum | EPHA3 | A  | 1.48407E-06 | -0.326947 | 0.000131411 |
| rs12633626            | 3 | 89744949 | GTEx/v8 | Brain Cerebellum | EPHA3 | A  | 1.526E-06   | -0.348666 | 0.000131411 |
| rs60243237            | 3 | 89694053 | GTEx/v8 | Brain Cerebellum | EPHA3 | T  | 1.52877E-06 | -0.305415 | 0.000131411 |

|             |   |          |         |                     |       |   |             |           |                    |
|-------------|---|----------|---------|---------------------|-------|---|-------------|-----------|--------------------|
| rs987748    | 3 | 89494030 | GTEX/v8 | Brain Cerebellum    | EPHA3 | A | 1.53426E-06 | -0.31043  | 0.000131411        |
| rs6800041   | 3 | 89448196 | GTEX/v8 | Brain Cerebellum    | EPHA3 | C | 1.53723E-06 | -0.323538 | 0.000131411        |
| rs12714734  | 3 | 90107488 | GTEX/v8 | Artery Tibial       | EPHA3 | C | 1.57366E-06 | 0.151478  | 7.80657E-07        |
| rs9816940   | 3 | 90146579 | GTEX/v8 | Artery Tibial       | EPHA3 | T | 1.58919E-06 | 0.153017  | 7.80657E-07        |
| rs9837548   | 3 | 90156142 | GTEX/v8 | Artery Tibial       | EPHA3 | T | 1.58919E-06 | 0.153017  | 7.80657E-07        |
| rs7637670   | 3 | 89493167 | GTEX/v8 | Brain Cerebellum    | EPHA3 | A | 1.60292E-06 | -0.309849 | 0.000131411        |
| rs11918555  | 3 | 89541934 | GTEX/v8 | Brain Cerebellum    | EPHA3 | T | 1.62669E-06 | -0.301267 | 0.000131411        |
| rs12637608  | 3 | 89551301 | GTEX/v8 | Brain Cerebellum    | EPHA3 | C | 1.62669E-06 | -0.301267 | 0.000131411        |
| rs66757381  | 3 | 89561048 | GTEX/v8 | Brain Cerebellum    | EPHA3 | T | 1.62669E-06 | -0.301267 | 0.000131411        |
| rs724972    | 3 | 89581408 | GTEX/v8 | Brain Cerebellum    | EPHA3 | T | 1.62669E-06 | -0.301267 | 0.000131411        |
| rs7652296   | 3 | 89587262 | GTEX/v8 | Brain Cerebellum    | EPHA3 | G | 1.62669E-06 | -0.301267 | 0.000131411        |
| rs993187    | 3 | 89314820 | GTEX/v8 | Artery Tibial       | EPHA3 | G | 1.68692E-06 | 0.158464  | 7.80657E-07        |
| rs11925143  | 3 | 89723684 | GTEX/v8 | Brain Cerebellum    | EPHA3 | A | 1.70688E-06 | -0.30234  | 0.000131411        |
| rs7632427   | 3 | 89534377 | eQTLGen | eQTLGen trans eQTLs | RBBP9 | C | 1.8006E-06  | -4.7745   | 0.0140155531990103 |
| rs7633500   | 3 | 89497082 | GTEX/v8 | Pancreas            | EPHA3 | A | 1.89641E-06 | 0.259798  | 3.49803E-07        |
| rs6806912   | 3 | 89751353 | GTEX/v8 | Brain Cerebellum    | EPHA3 | C | 1.9144E-06  | -0.305863 | 0.000131411        |
| rs7653735   | 3 | 89722185 | GTEX/v8 | Brain Cerebellum    | EPHA3 | A | 1.95581E-06 | -0.303396 | 0.000131411        |
| rs9863058   | 3 | 89322805 | GTEX/v8 | Brain Cerebellum    | EPHA3 | T | 1.9655E-06  | -0.322799 | 0.000131411        |
| rs4857502   | 3 | 89324919 | GTEX/v8 | Brain Cerebellum    | EPHA3 | A | 1.9655E-06  | -0.322799 | 0.000131411        |
| rs2137487   | 3 | 89325520 | GTEX/v8 | Brain Cerebellum    | EPHA3 | G | 1.9655E-06  | -0.322799 | 0.000131411        |
| rs9875278   | 3 | 89335463 | GTEX/v8 | Brain Cerebellum    | EPHA3 | T | 1.9655E-06  | -0.322799 | 0.000131411        |
| rs9821666   | 3 | 89339548 | GTEX/v8 | Brain Cerebellum    | EPHA3 | T | 1.9655E-06  | -0.322799 | 0.000131411        |
| rs1512908   | 3 | 89340134 | GTEX/v8 | Brain Cerebellum    | EPHA3 | A | 1.9655E-06  | -0.322799 | 0.000131411        |
| rs9852380   | 3 | 89341738 | GTEX/v8 | Brain Cerebellum    | EPHA3 | G | 1.9655E-06  | -0.322799 | 0.000131411        |
| rs9852722   | 3 | 89341946 | GTEX/v8 | Brain Cerebellum    | EPHA3 | C | 1.9655E-06  | -0.322799 | 0.000131411        |
| rs73137384  | 3 | 89463290 | GTEX/v8 | Brain Cerebellum    | EPHA3 | T | 1.97372E-06 | -0.344073 | 0.000131411        |
| rs9832305   | 3 | 89392778 | GTEX/v8 | Brain Cerebellum    | EPHA3 | C | 2.03152E-06 | -0.317078 | 0.000131411        |
| rs7615949   | 3 | 89432683 | GTEX/v8 | Brain Cerebellum    | EPHA3 | G | 2.05275E-06 | -0.317964 | 0.000131411        |
| rs113450730 | 3 | 90135516 | GTEX/v8 | Artery Tibial       | EPHA3 | G | 2.23345E-06 | 0.156885  | 7.80657E-07        |
| rs2117138   | 3 | 89531522 | GTEX/v8 | Brain Cerebellum    | EPHA3 | G | 2.25084E-06 | -0.332679 | 0.000131411        |
| rs12634269  | 3 | 89532768 | GTEX/v8 | Brain Cerebellum    | EPHA3 | C | 2.25084E-06 | -0.332679 | 0.000131411        |
| rs819293    | 3 | 89613664 | GTEX/v8 | Brain Cerebellum    | EPHA3 | A | 2.2568E-06  | -0.340532 | 0.000131411        |
| rs12633626  | 3 | 89744949 | GTEX/v8 | Artery Tibial       | EPHA3 | A | 2.299E-06   | 0.157899  | 7.80657E-07        |
| rs2346837   | 3 | 89542599 | GTEX/v8 | Brain Cerebellum    | EPHA3 | T | 2.39154E-06 | -0.326146 | 0.000131411        |
| rs11923303  | 3 | 89380944 | GTEX/v8 | Brain Cerebellum    | EPHA3 | A | 2.42101E-06 | -0.296307 | 0.000131411        |
| rs9864984   | 3 | 89428776 | GTEX/v8 | Brain Cerebellum    | EPHA3 | T | 2.5615E-06  | -0.315584 | 0.000131411        |
| rs9825569   | 3 | 89431650 | GTEX/v8 | Brain Cerebellum    | EPHA3 | C | 2.5615E-06  | -0.315584 | 0.000131411        |
| rs62275019  | 3 | 89433648 | GTEX/v8 | Brain Cerebellum    | EPHA3 | G | 2.5615E-06  | -0.315584 | 0.000131411        |
| rs7619303   | 3 | 89552554 | GTEX/v8 | Brain Cerebellum    | EPHA3 | A | 2.58965E-06 | -0.320493 | 0.000131411        |
| rs73149109  | 3 | 89567344 | GTEX/v8 | Brain Cerebellum    | EPHA3 | A | 2.58965E-06 | -0.320493 | 0.000131411        |
| rs1080592   | 3 | 89567568 | GTEX/v8 | Brain Cerebellum    | EPHA3 | C | 2.58965E-06 | -0.320493 | 0.000131411        |
| rs62278163  | 3 | 89291836 | GTEX/v8 | Brain Cerebellum    | EPHA3 | T | 2.68546E-06 | -0.32343  | 0.000131411        |
| rs6786328   | 3 | 89298926 | GTEX/v8 | Brain Cerebellum    | EPHA3 | G | 2.68546E-06 | -0.32343  | 0.000131411        |
| rs62278168  | 3 | 89301573 | GTEX/v8 | Brain Cerebellum    | EPHA3 | G | 2.68546E-06 | -0.32343  | 0.000131411        |

|                                   |   |          |         |                  |       |      |             |           |             |
|-----------------------------------|---|----------|---------|------------------|-------|------|-------------|-----------|-------------|
| rs28620812                        | 3 | 89305668 | GTex/v8 | Brain Cerebellum | EPHA3 | T    | 2.68546E-06 | -0.32343  | 0.000131411 |
| rs62278172                        | 3 | 89306038 | GTex/v8 | Brain Cerebellum | EPHA3 | A    | 2.68546E-06 | -0.32343  | 0.000131411 |
| rs9310120                         | 3 | 89378413 | GTex/v8 | Brain Cerebellum | EPHA3 | C    | 2.72467E-06 | -0.291525 | 0.000131411 |
| rs35511518                        | 3 | 89383683 | GTex/v8 | Brain Cerebellum | EPHA3 | C    | 2.88981E-06 | -0.293769 | 0.000131411 |
| rs55931912                        | 3 | 90038054 | GTex/v8 | Artery Tibial    | EPHA3 | A    | 2.94174E-06 | 0.160673  | 7.80657E-07 |
| rs6782527                         | 3 | 89442369 | GTex/v8 | Brain Cerebellum | EPHA3 | T    | 2.94697E-06 | -0.323056 | 0.000131411 |
| rs1512185                         | 3 | 89473615 | GTex/v8 | Brain Cerebellum | EPHA3 | A    | 2.95573E-06 | -0.333755 | 0.000131411 |
| rs2069183                         | 3 | 89645017 | GTex/v8 | Brain Cerebellum | EPHA3 | A    | 2.97291E-06 | -0.333067 | 0.000131411 |
| rs2137488                         | 3 | 89308704 | GTex/v8 | Brain Cerebellum | EPHA3 | G    | 3.01033E-06 | -0.321737 | 0.000131411 |
| rs62274982                        | 3 | 89310731 | GTex/v8 | Brain Cerebellum | EPHA3 | A    | 3.01033E-06 | -0.321737 | 0.000131411 |
| rs9866618                         | 3 | 89319577 | GTex/v8 | Brain Cerebellum | EPHA3 | C    | 3.01033E-06 | -0.321737 | 0.000131411 |
| rs138643396                       | 3 | 89698092 | GTex/v8 | Brain Cerebellum | EPHA3 | CATA | 3.03531E-06 | -0.29645  | 0.000131411 |
| rs59381722                        | 3 | 89701482 | GTex/v8 | Brain Cerebellum | EPHA3 | G    | 3.03531E-06 | -0.29645  | 0.000131411 |
| rs7637504                         | 3 | 89702469 | GTex/v8 | Brain Cerebellum | EPHA3 | T    | 3.03531E-06 | -0.29645  | 0.000131411 |
| rs6551415                         | 3 | 89705161 | GTex/v8 | Brain Cerebellum | EPHA3 | T    | 3.03531E-06 | -0.29645  | 0.000131411 |
| rs9875278                         | 3 | 89335463 | GTex/v8 | Artery Tibial    | EPHA3 | T    | 3.09831E-06 | 0.148813  | 7.80657E-07 |
| rs35448293                        | 3 | 89386010 | GTex/v8 | Brain Cerebellum | EPHA3 | G    | 3.10479E-06 | -0.294378 | 0.000131411 |
| rs144317613                       | 3 | 89525080 | GTex/v8 | Artery Tibial    | EPHA3 | TA   | 3.16115E-06 | 0.154826  | 7.80657E-07 |
| rs35173319                        | 3 | 89386361 | GTex/v8 | Brain Cerebellum | EPHA3 | T    | 3.26506E-06 | -0.293781 | 0.000131411 |
| rs12631313                        | 3 | 89528461 | GTex/v8 | Brain Cerebellum | EPHA3 | T    | 3.26615E-06 | -0.327927 | 0.000131411 |
| rs7650466                         | 3 | 89530358 | GTex/v8 | Brain Cerebellum | EPHA3 | T    | 3.26615E-06 | -0.327927 | 0.000131411 |
| rs112407114                       | 3 | 89797398 | GTex/v8 | Artery Tibial    | EPHA3 | C    | 3.30588E-06 | 0.157525  | 7.80657E-07 |
| rs12638746                        | 3 | 89331055 | GTex/v8 | Artery Tibial    | EPHA3 | A    | 3.30854E-06 | -0.141292 | 7.80657E-07 |
| rs9848971                         | 3 | 89279394 | GTex/v8 | Brain Cerebellum | EPHA3 | G    | 3.5827E-06  | -0.323238 | 0.000131411 |
| rs4857502                         | 3 | 89324919 | GTex/v8 | Artery Tibial    | EPHA3 | A    | 3.61635E-06 | 0.14766   | 7.80657E-07 |
| rs1567731                         | 3 | 89316027 | GTex/v8 | Artery Tibial    | EPHA3 | T    | 3.66393E-06 | 0.147438  | 7.80657E-07 |
| rs28620812                        | 3 | 89305668 | GTex/v8 | Artery Tibial    | EPHA3 | T    | 3.66811E-06 | 0.147499  | 7.80657E-07 |
| rs62278172                        | 3 | 89306038 | GTex/v8 | Artery Tibial    | EPHA3 | A    | 3.66811E-06 | 0.147499  | 7.80657E-07 |
| rs9817553                         | 3 | 89384566 | GTex/v8 | Brain Cerebellum | EPHA3 | G    | 3.69048E-06 | -0.289832 | 0.000131411 |
| rs6776967                         | 3 | 90025022 | GTex/v8 | Artery Tibial    | EPHA3 | T    | 3.79842E-06 | 0.151056  | 7.80657E-07 |
| rs9310119                         | 3 | 89378042 | GTex/v8 | Brain Cerebellum | EPHA3 | G    | 3.8657E-06  | -0.290574 | 0.000131411 |
| rs28675360                        | 3 | 89386151 | GTex/v8 | Brain Cerebellum | EPHA3 | T    | 3.88293E-06 | -0.291267 | 0.000131411 |
| rs9863058                         | 3 | 89322805 | GTex/v8 | Artery Tibial    | EPHA3 | T    | 3.93751E-06 | 0.146765  | 7.80657E-07 |
| rs62274986                        | 3 | 89327148 | GTex/v8 | Brain Cerebellum | EPHA3 | A    | 3.93801E-06 | -0.317653 | 0.000131411 |
| rs73153370                        | 3 | 90056125 | GTex/v8 | Artery Tibial    | EPHA3 | A    | 3.94503E-06 | 0.151255  | 7.80657E-07 |
| rs57670516                        | 3 | 89419645 | GTex/v8 | Pancreas         | EPHA3 | C    | 4.16777E-06 | 0.26691   | 3.49803E-07 |
| 3:89420088_TG<br>TGACCTAGA<br>C_T | 3 | 89420088 | GTex/v8 | Pancreas         | EPHA3 | T    | 4.16777E-06 | 0.26691   | 3.49803E-07 |
| rs9854073                         | 3 | 89426589 | GTex/v8 | Pancreas         | EPHA3 | A    | 4.16777E-06 | 0.26691   | 3.49803E-07 |
| rs9849029                         | 3 | 89433059 | GTex/v8 | Pancreas         | EPHA3 | G    | 4.16777E-06 | 0.26691   | 3.49803E-07 |
| rs2137487                         | 3 | 89325520 | GTex/v8 | Artery Tibial    | EPHA3 | G    | 4.23081E-06 | 0.146733  | 7.80657E-07 |
| rs9821666                         | 3 | 89339548 | GTex/v8 | Artery Tibial    | EPHA3 | T    | 4.23081E-06 | 0.146733  | 7.80657E-07 |
| rs1512908                         | 3 | 89340134 | GTex/v8 | Artery Tibial    | EPHA3 | A    | 4.23081E-06 | 0.146733  | 7.80657E-07 |
| rs9852380                         | 3 | 89341738 | GTex/v8 | Artery Tibial    | EPHA3 | G    | 4.23081E-06 | 0.146733  | 7.80657E-07 |
| rs9852722                         | 3 | 89341946 | GTex/v8 | Artery Tibial    | EPHA3 | C    | 4.23081E-06 | 0.146733  | 7.80657E-07 |
| rs1398534                         | 3 | 89329307 | GTex/v8 | Brain Cerebellum | EPHA3 | G    | 4.2324E-06  | -0.313436 | 0.000131411 |
| rs17800551                        | 3 | 89317315 | GTex/v8 | Artery Tibial    | EPHA3 | T    | 4.30899E-06 | 0.146349  | 7.80657E-07 |
| rs62274984                        | 3 | 89318317 | GTex/v8 | Artery Tibial    | EPHA3 | A    | 4.30899E-06 | 0.146349  | 7.80657E-07 |



|                      |   |          |          |                  |       |   |             |           |             |
|----------------------|---|----------|----------|------------------|-------|---|-------------|-----------|-------------|
| rs752364173          | 3 | 89521820 | GTEEx/v8 | Brain Cerebellum | EPHA3 | T | 4.47555E-06 | -0.325467 | 0.000131411 |
| 3:89521831_TG AAAG T | 3 | 89521831 | GTEEx/v8 | Brain Cerebellum | EPHA3 | T | 4.47555E-06 | -0.325467 | 0.000131411 |
| 3:89521838_TT TG T   | 3 | 89521838 | GTEEx/v8 | Brain Cerebellum | EPHA3 | T | 4.47555E-06 | -0.325467 | 0.000131411 |
| rs6797260            | 3 | 89302486 | GTEEx/v8 | Artery Tibial    | EPHA3 | T | 4.47908E-06 | -0.139789 | 7.80657E-07 |
| rs9866618            | 3 | 89319577 | GTEEx/v8 | Artery Tibial    | EPHA3 | C | 4.49777E-06 | 0.146776  | 7.80657E-07 |
| rs6771054            | 3 | 89489529 | GTEEx/v8 | Brain Cerebellum | EPHA3 | C | 4.69366E-06 | -0.293501 | 0.000131411 |
| rs7644070            | 3 | 89370107 | GTEEx/v8 | Brain Cerebellum | EPHA3 | A | 4.75765E-06 | -0.288734 | 0.000131411 |
| rs113895673          | 3 | 89917796 | GTEEx/v8 | Pancreas         | EPHA3 | C | 4.8159E-06  | 0.292706  | 3.49803E-07 |
| rs62274986           | 3 | 89327148 | GTEEx/v8 | Artery Tibial    | EPHA3 | A | 4.83202E-06 | 0.147343  | 7.80657E-07 |
| rs6782527            | 3 | 89442369 | GTEEx/v8 | Artery Tibial    | EPHA3 | T | 4.95543E-06 | 0.1499    | 7.80657E-07 |
| rs55787722           | 3 | 90012103 | GTEEx/v8 | Artery Tibial    | EPHA3 | T | 5.00725E-06 | 0.14935   | 7.80657E-07 |
| rs62274981           | 3 | 89310605 | GTEEx/v8 | Artery Tibial    | EPHA3 | T | 5.03773E-06 | 0.145415  | 7.80657E-07 |
| rs17800347           | 3 | 89314429 | GTEEx/v8 | Artery Tibial    | EPHA3 | G | 5.03773E-06 | 0.145415  | 7.80657E-07 |
| rs993186             | 3 | 89314862 | GTEEx/v8 | Artery Tibial    | EPHA3 | G | 5.03773E-06 | 0.145415  | 7.80657E-07 |
| rs13100388           | 3 | 89383148 | GTEEx/v8 | Brain Cerebellum | EPHA3 | A | 5.04914E-06 | -0.284963 | 0.000131411 |
| rs6419884            | 3 | 89279467 | GTEEx/v8 | Brain Cerebellum | EPHA3 | T | 5.19678E-06 | 0.292251  | 0.000131411 |
| rs9833400            | 3 | 89389507 | GTEEx/v8 | Brain Cerebellum | EPHA3 | G | 5.2433E-06  | -0.286472 | 0.000131411 |
| rs7619303            | 3 | 89552554 | GTEEx/v8 | Artery Tibial    | EPHA3 | A | 5.32619E-06 | 0.145109  | 7.80657E-07 |
| rs1036285            | 3 | 89544061 | GTEEx/v8 | Artery Tibial    | EPHA3 | C | 5.391E-06   | 0.145676  | 7.80657E-07 |
| rs17026984           | 3 | 89544978 | GTEEx/v8 | Artery Tibial    | EPHA3 | A | 5.391E-06   | 0.145676  | 7.80657E-07 |
| rs111618480          | 3 | 89552134 | GTEEx/v8 | Artery Tibial    | EPHA3 | C | 5.391E-06   | 0.145676  | 7.80657E-07 |
| rs62278164           | 3 | 89292567 | GTEEx/v8 | Brain Cerebellum | EPHA3 | C | 5.41224E-06 | -0.317954 | 0.000131411 |
| rs9883541            | 3 | 89294657 | GTEEx/v8 | Brain Cerebellum | EPHA3 | C | 5.41224E-06 | -0.317954 | 0.000131411 |
| rs62274982           | 3 | 89310731 | GTEEx/v8 | Artery Tibial    | EPHA3 | A | 5.71992E-06 | 0.146085  | 7.80657E-07 |
| rs2137488            | 3 | 89308704 | GTEEx/v8 | Artery Tibial    | EPHA3 | G | 5.78921E-06 | 0.145371  | 7.80657E-07 |
| rs12634269           | 3 | 89532768 | GTEEx/v8 | Artery Tibial    | EPHA3 | C | 5.8533E-06  | 0.146048  | 7.80657E-07 |
| rs62278163           | 3 | 89291836 | GTEEx/v8 | Artery Tibial    | EPHA3 | T | 5.90756E-06 | 0.14456   | 7.80657E-07 |
| rs6786328            | 3 | 89298926 | GTEEx/v8 | Artery Tibial    | EPHA3 | G | 5.90756E-06 | 0.14456   | 7.80657E-07 |
| rs62278168           | 3 | 89301573 | GTEEx/v8 | Artery Tibial    | EPHA3 | G | 5.90756E-06 | 0.14456   | 7.80657E-07 |
| rs112407114          | 3 | 89797398 | GTEEx/v8 | Brain Cerebellum | EPHA3 | C | 6.08314E-06 | -0.333729 | 0.000131411 |
| rs62275018           | 3 | 89423863 | GTEEx/v8 | Brain Cerebellum | EPHA3 | G | 6.32511E-06 | -0.305486 | 0.000131411 |
| rs9310121            | 3 | 89378987 | GTEEx/v8 | Brain Cerebellum | EPHA3 | G | 6.34498E-06 | -0.28251  | 0.000131411 |
| rs9310122            | 3 | 89379408 | GTEEx/v8 | Brain Cerebellum | EPHA3 | G | 6.34498E-06 | -0.28251  | 0.000131411 |
| rs9846844            | 3 | 89379639 | GTEEx/v8 | Brain Cerebellum | EPHA3 | A | 6.34498E-06 | -0.28251  | 0.000131411 |
| rs73153293           | 3 | 89756242 | GTEEx/v8 | Brain Cerebellum | EPHA3 | T | 6.37713E-06 | -0.339017 | 0.000131411 |
| rs145565219          | 3 | 89936402 | GTEEx/v8 | Artery Tibial    | EPHA3 | A | 6.39268E-06 | 0.153684  | 7.80657E-07 |
| rs7613412            | 3 | 89724217 | GTEEx/v8 | Brain Cerebellum | EPHA3 | T | 6.6714E-06  | -0.290591 | 0.000131411 |
| rs62278164           | 3 | 89292567 | GTEEx/v8 | Artery Tibial    | EPHA3 | C | 6.71388E-06 | 0.145209  | 7.80657E-07 |
| rs9883541            | 3 | 89294657 | GTEEx/v8 | Artery Tibial    | EPHA3 | C | 6.71388E-06 | 0.145209  | 7.80657E-07 |
| rs73145304           | 3 | 89568989 | GTEEx/v8 | Artery Tibial    | EPHA3 | T | 7.14309E-06 | 0.145168  | 7.80657E-07 |
| rs73145310           | 3 | 89578097 | GTEEx/v8 | Artery Tibial    | EPHA3 | C | 7.14309E-06 | 0.145168  | 7.80657E-07 |
| rs73145312           | 3 | 89578575 | GTEEx/v8 | Artery Tibial    | EPHA3 | T | 7.14309E-06 | 0.145168  | 7.80657E-07 |
| rs73145320           | 3 | 89586535 | GTEEx/v8 | Artery Tibial    | EPHA3 | C | 7.14309E-06 | 0.145168  | 7.80657E-07 |
| rs13075167           | 3 | 89303172 | GTEEx/v8 | Artery Tibial    | EPHA3 | C | 7.14359E-06 | -0.136941 | 7.80657E-07 |
| rs113895673          | 3 | 89917796 | GTEEx/v8 | Artery Tibial    | EPHA3 | C | 7.21958E-06 | 0.152514  | 7.80657E-07 |
| rs9862638            | 3 | 89373598 | GTEEx/v8 | Artery Tibial    | EPHA3 | C | 7.31028E-06 | 0.125044  | 7.80657E-07 |
| rs1398532            | 3 | 89367901 | GTEEx/v8 | Brain Cerebellum | EPHA3 | C | 7.58961E-06 | -0.281373 | 0.000131411 |
| rs59969878           | 3 | 89369856 | GTEEx/v8 | Brain Cerebellum | EPHA3 | A | 7.58961E-06 | -0.281373 | 0.000131411 |
| rs993187             | 3 | 89314820 | GTEEx/v8 | Pancreas         | EPHA3 | G | 7.78447E-06 | 0.274968  | 3.49803E-07 |

|                      |   |          |          |                  |        |   |             |           |             |
|----------------------|---|----------|----------|------------------|--------|---|-------------|-----------|-------------|
| rs9866959            | 3 | 89379935 | GTEEx/v8 | Brain Cerebellum | EPHA3  | C | 7.983E-06   | -0.279055 | 0.000131411 |
| rs7616322            | 3 | 89493283 | GTEEx/v8 | Brain Cerebellum | EPHA3  | T | 8.01438E-06 | -0.320833 | 0.000131411 |
| rs7645408            | 3 | 89446132 | GTEEx/v8 | Pancreas         | EPHA3  | A | 8.33515E-06 | 0.250421  | 3.49803E-07 |
| rs28623022           | 3 | 89448936 | GTEEx/v8 | Pancreas         | EPHA3  | A | 8.33515E-06 | 0.250421  | 3.49803E-07 |
| rs113895673          | 3 | 89917796 | GTEEx/v8 | Brain Cerebellum | EPHA3  | C | 8.55292E-06 | -0.324874 | 0.000131411 |
| 3:89924704_TG T      | 3 | 89924704 | GTEEx/v8 | Brain Cerebellum | EPHA3  | T | 8.55292E-06 | -0.324874 | 0.000131411 |
| rs145565219          | 3 | 89936402 | GTEEx/v8 | Brain Cerebellum | EPHA3  | A | 8.55292E-06 | -0.324874 | 0.000131411 |
| rs9848971            | 3 | 89279394 | GTEEx/v8 | Artery Tibial    | EPHA3  | G | 8.76038E-06 | 0.142057  | 7.80657E-07 |
| rs62275018           | 3 | 89423863 | GTEEx/v8 | Pancreas         | EPHA3  | G | 9.33406E-06 | 0.250575  | 3.49803E-07 |
| rs7615949            | 3 | 89432683 | GTEEx/v8 | Pancreas         | EPHA3  | G | 9.33406E-06 | 0.250575  | 3.49803E-07 |
| rs9873545            | 3 | 89377717 | GTEEx/v8 | Brain Cerebellum | EPHA3  | G | 9.40869E-06 | -0.278237 | 0.000131411 |
| rs2063590            | 3 | 89323932 | GTEEx/v8 | Pancreas         | EPHA3  | C | 9.50719E-06 | 0.270994  | 3.49803E-07 |
| rs1512185            | 3 | 89473615 | GTEEx/v8 | Artery Tibial    | EPHA3  | A | 9.59551E-06 | 0.141066  | 7.80657E-07 |
| rs1398534            | 3 | 89329307 | GTEEx/v8 | Artery Tibial    | EPHA3  | G | 9.64593E-06 | 0.141256  | 7.80657E-07 |
| rs73153279           | 3 | 89727968 | GTEEx/v8 | Brain Cerebellum | EPHA3  | C | 9.69777E-06 | -0.314789 | 0.000131411 |
| rs73153282           | 3 | 89728408 | GTEEx/v8 | Brain Cerebellum | EPHA3  | T | 9.69777E-06 | -0.314789 | 0.000131411 |
| rs6551410            | 3 | 89442305 | GTEEx/v8 | Brain Cerebellum | EPHA3  | A | 1.01844E-05 | -0.28014  | 0.000131411 |
| rs9990016            | 3 | 89364033 | GTEEx/v8 | Brain Cerebellum | EPHA3  | A | 1.08374E-05 | -0.28036  | 0.000131411 |
| rs73149109           | 3 | 89567344 | GTEEx/v8 | Artery Tibial    | EPHA3  | A | 1.08887E-05 | 0.140148  | 7.80657E-07 |
| rs1080592            | 3 | 89567568 | GTEEx/v8 | Artery Tibial    | EPHA3  | C | 1.08887E-05 | 0.140148  | 7.80657E-07 |
| rs73137395           | 3 | 89478753 | GTEEx/v8 | Artery Tibial    | EPHA3  | C | 1.09323E-05 | 0.143333  | 7.80657E-07 |
| rs73139257           | 3 | 89482779 | GTEEx/v8 | Artery Tibial    | EPHA3  | G | 1.09323E-05 | 0.143333  | 7.80657E-07 |
| 3:89924704_TG T      | 3 | 89924704 | GTEEx/v8 | Artery Tibial    | EPHA3  | T | 1.09412E-05 | 0.149669  | 7.80657E-07 |
| rs17738248           | 3 | 89296363 | GTEEx/v8 | Pancreas         | EPHA3  | A | 1.09578E-05 | 0.272841  | 3.49803E-07 |
| rs73137384           | 3 | 89463290 | GTEEx/v8 | Artery Tibial    | EPHA3  | T | 1.17861E-05 | 0.140098  | 7.80657E-07 |
| rs2069183            | 3 | 89645017 | GTEEx/v8 | Artery Tibial    | EPHA3  | A | 1.20408E-05 | 0.144339  | 7.80657E-07 |
| rs954964             | 3 | 89355632 | GTEEx/v8 | Brain Cerebellum | EPHA3  | G | 1.22093E-05 | -0.273862 | 0.000131411 |
| rs13088663           | 3 | 89360266 | GTEEx/v8 | Brain Cerebellum | EPHA3  | T | 1.22093E-05 | -0.273862 | 0.000131411 |
| rs9839323            | 3 | 89190113 | GTEEx/v8 | Lung             | CGGBP1 | A | 1.23179E-05 | 0.183962  | 1.81917E-48 |
| rs993187             | 3 | 89314820 | GTEEx/v8 | Brain Cerebellum | EPHA3  | G | 1.23204E-05 | -0.303884 | 0.000131411 |
| rs7615949            | 3 | 89432683 | GTEEx/v8 | Artery Tibial    | EPHA3  | G | 1.24482E-05 | 0.135002  | 7.80657E-07 |
| rs13323078           | 3 | 89168325 | GTEEx/v8 | Lung             | CGGBP1 | A | 1.27567E-05 | 0.182688  | 1.81917E-48 |
| rs145565219          | 3 | 89936402 | GTEEx/v8 | Pancreas         | EPHA3  | A | 1.31568E-05 | 0.28696   | 3.49803E-07 |
| rs9873545            | 3 | 89377717 | GTEEx/v8 | Artery Tibial    | EPHA3  | G | 1.32482E-05 | 0.122036  | 7.80657E-07 |
| rs73151349           | 3 | 89892899 | GTEEx/v8 | Artery Tibial    | EPHA3  | G | 1.33999E-05 | 0.148574  | 7.80657E-07 |
| rs9867299            | 3 | 89300497 | GTEEx/v8 | Artery Tibial    | EPHA3  | A | 1.35373E-05 | 0.122174  | 7.80657E-07 |
| rs1512183            | 3 | 89505054 | GTEEx/v8 | Artery Tibial    | EPHA3  | T | 1.38036E-05 | 0.140822  | 7.80657E-07 |
| rs73153283           | 3 | 89732193 | GTEEx/v8 | Brain Cerebellum | EPHA3  | T | 1.40234E-05 | -0.309356 | 0.000131411 |
| rs752364173          | 3 | 89521820 | GTEEx/v8 | Artery Tibial    | EPHA3  | T | 1.40686E-05 | 0.138789  | 7.80657E-07 |
| 3:89521831_TG AAAG T | 3 | 89521831 | GTEEx/v8 | Artery Tibial    | EPHA3  | T | 1.40686E-05 | 0.138789  | 7.80657E-07 |
| 3:89521838_TT TG T   | 3 | 89521838 | GTEEx/v8 | Artery Tibial    | EPHA3  | T | 1.40686E-05 | 0.138789  | 7.80657E-07 |
| rs66708608           | 3 | 89486373 | GTEEx/v8 | Brain Cerebellum | EPHA3  | T | 1.46451E-05 | -0.319235 | 0.000131411 |
| rs7616322            | 3 | 89493283 | GTEEx/v8 | Artery Tibial    | EPHA3  | T | 1.47881E-05 | 0.138523  | 7.80657E-07 |
| rs12637608           | 3 | 89551301 | GTEEx/v8 | Artery Tibial    | EPHA3  | C | 1.48728E-05 | 0.125146  | 7.80657E-07 |
| rs56371328           | 3 | 89539124 | GTEEx/v8 | Artery Tibial    | EPHA3  | A | 1.50588E-05 | 0.139235  | 7.80657E-07 |
| rs4857498            | 3 | 89540977 | GTEEx/v8 | Artery Tibial    | EPHA3  | A | 1.50588E-05 | 0.139235  | 7.80657E-07 |
| rs4857499            | 3 | 89541330 | GTEEx/v8 | Artery Tibial    | EPHA3  | A | 1.50588E-05 | 0.139235  | 7.80657E-07 |
| rs12633609           | 3 | 89545727 | GTEEx/v8 | Artery Tibial    | EPHA3  | G | 1.50588E-05 | 0.139235  | 7.80657E-07 |
| rs1512188            | 3 | 89546183 | GTEEx/v8 | Artery Tibial    | EPHA3  | G | 1.50588E-05 | 0.139235  | 7.80657E-07 |

|                   |   |          |          |                  |       |    |             |           |             |
|-------------------|---|----------|----------|------------------|-------|----|-------------|-----------|-------------|
| rs73146943        | 3 | 89546728 | GTEEx/v8 | Artery Tibial    | EPHA3 | G  | 1.50588E-05 | 0.139235  | 7.80657E-07 |
| rs12632281        | 3 | 89547621 | GTEEx/v8 | Artery Tibial    | EPHA3 | A  | 1.50588E-05 | 0.139235  | 7.80657E-07 |
| rs73146947        | 3 | 89548135 | GTEEx/v8 | Artery Tibial    | EPHA3 | G  | 1.50588E-05 | 0.139235  | 7.80657E-07 |
| rs73146950        | 3 | 89548243 | GTEEx/v8 | Artery Tibial    | EPHA3 | C  | 1.50588E-05 | 0.139235  | 7.80657E-07 |
| rs1567657         | 3 | 89548519 | GTEEx/v8 | Artery Tibial    | EPHA3 | A  | 1.50588E-05 | 0.139235  | 7.80657E-07 |
| rs1567658         | 3 | 89548606 | GTEEx/v8 | Artery Tibial    | EPHA3 | A  | 1.50588E-05 | 0.139235  | 7.80657E-07 |
| rs73146959        | 3 | 89549970 | GTEEx/v8 | Artery Tibial    | EPHA3 | C  | 1.50588E-05 | 0.139235  | 7.80657E-07 |
| rs73146960        | 3 | 89550445 | GTEEx/v8 | Artery Tibial    | EPHA3 | C  | 1.50588E-05 | 0.139235  | 7.80657E-07 |
| rs112404167       | 3 | 89550630 | GTEEx/v8 | Artery Tibial    | EPHA3 | T  | 1.50588E-05 | 0.139235  | 7.80657E-07 |
| rs12637511        | 3 | 89550844 | GTEEx/v8 | Artery Tibial    | EPHA3 | C  | 1.50588E-05 | 0.139235  | 7.80657E-07 |
| rs73146972        | 3 | 89553348 | GTEEx/v8 | Artery Tibial    | EPHA3 | G  | 1.50588E-05 | 0.139235  | 7.80657E-07 |
| rs17026990        | 3 | 89555257 | GTEEx/v8 | Artery Tibial    | EPHA3 | C  | 1.50588E-05 | 0.139235  | 7.80657E-07 |
| rs73146976        | 3 | 89557065 | GTEEx/v8 | Artery Tibial    | EPHA3 | C  | 1.50588E-05 | 0.139235  | 7.80657E-07 |
| rs1039991         | 3 | 89558311 | GTEEx/v8 | Artery Tibial    | EPHA3 | G  | 1.50588E-05 | 0.139235  | 7.80657E-07 |
| rs73146980        | 3 | 89558578 | GTEEx/v8 | Artery Tibial    | EPHA3 | A  | 1.50588E-05 | 0.139235  | 7.80657E-07 |
| rs73146983        | 3 | 89559082 | GTEEx/v8 | Artery Tibial    | EPHA3 | G  | 1.50588E-05 | 0.139235  | 7.80657E-07 |
| rs138490449       | 3 | 89561661 | GTEEx/v8 | Artery Tibial    | EPHA3 | AT | 1.50588E-05 | 0.139235  | 7.80657E-07 |
| rs138183278       | 3 | 89564090 | GTEEx/v8 | Artery Tibial    | EPHA3 | CT | 1.50588E-05 | 0.139235  | 7.80657E-07 |
| rs6774870         | 3 | 89564891 | GTEEx/v8 | Artery Tibial    | EPHA3 | T  | 1.50588E-05 | 0.139235  | 7.80657E-07 |
| rs113307255       | 3 | 89567826 | GTEEx/v8 | Artery Tibial    | EPHA3 | C  | 1.50588E-05 | 0.139235  | 7.80657E-07 |
| rs73153282        | 3 | 89728408 | GTEEx/v8 | Artery Tibial    | EPHA3 | T  | 1.51422E-05 | 0.141824  | 7.80657E-07 |
| rs73153241        | 3 | 89695319 | GTEEx/v8 | Brain Cerebellum | EPHA3 | G  | 1.52792E-05 | -0.306774 | 0.000131411 |
| rs73145317        | 3 | 89583712 | GTEEx/v8 | Brain Cerebellum | EPHA3 | C  | 1.53352E-05 | -0.364409 | 0.000131411 |
| rs10511145        | 3 | 89597679 | GTEEx/v8 | Artery Tibial    | EPHA3 | A  | 1.56217E-05 | 0.125943  | 7.80657E-07 |
| 3:89598352_GG T_G | 3 | 89598352 | GTEEx/v8 | Artery Tibial    | EPHA3 | G  | 1.56217E-05 | 0.125943  | 7.80657E-07 |
| rs17027018        | 3 | 89604774 | GTEEx/v8 | Artery Tibial    | EPHA3 | T  | 1.56217E-05 | 0.125943  | 7.80657E-07 |
| rs2346837         | 3 | 89542599 | GTEEx/v8 | Artery Tibial    | EPHA3 | T  | 1.58851E-05 | 0.139109  | 7.80657E-07 |
| rs35173319        | 3 | 89386361 | GTEEx/v8 | Artery Tibial    | EPHA3 | T  | 1.60562E-05 | 0.122651  | 7.80657E-07 |
| rs73151349        | 3 | 89892899 | GTEEx/v8 | Brain Cerebellum | EPHA3 | G  | 1.61632E-05 | -0.318556 | 0.000131411 |
| rs73145338        | 3 | 89594767 | GTEEx/v8 | Artery Tibial    | EPHA3 | T  | 1.61827E-05 | 0.125766  | 7.80657E-07 |
| rs7621573         | 3 | 89595252 | GTEEx/v8 | Artery Tibial    | EPHA3 | T  | 1.61827E-05 | 0.125766  | 7.80657E-07 |
| rs1398531         | 3 | 89289709 | GTEEx/v8 | Artery Tibial    | EPHA3 | T  | 1.65645E-05 | 0.136374  | 7.80657E-07 |
| rs11923303        | 3 | 89380944 | GTEEx/v8 | Artery Tibial    | EPHA3 | A  | 1.6566E-05  | 0.122508  | 7.80657E-07 |
| rs2063590         | 3 | 89323932 | GTEEx/v8 | Brain Cerebellum | EPHA3 | C  | 1.67149E-05 | -0.303021 | 0.000131411 |
| rs9310119         | 3 | 89378042 | GTEEx/v8 | Artery Tibial    | EPHA3 | G  | 1.73911E-05 | 0.121808  | 7.80657E-07 |
| rs59127701        | 3 | 89291916 | GTEEx/v8 | Brain Cerebellum | EPHA3 | TA | 1.87081E-05 | -0.316913 | 0.000131411 |
| rs6795325         | 3 | 89642054 | GTEEx/v8 | Artery Tibial    | EPHA3 | C  | 1.91183E-05 | 0.124312  | 7.80657E-07 |
| rs17026944        | 3 | 89521131 | GTEEx/v8 | Artery Tibial    | EPHA3 | A  | 1.91548E-05 | 0.137791  | 7.80657E-07 |
| rs73139125        | 3 | 89524056 | GTEEx/v8 | Artery Tibial    | EPHA3 | G  | 1.91548E-05 | 0.137791  | 7.80657E-07 |
| rs66708608        | 3 | 89486373 | GTEEx/v8 | Artery Tibial    | EPHA3 | T  | 1.93534E-05 | 0.138853  | 7.80657E-07 |
| rs73153262        | 3 | 89719269 | GTEEx/v8 | Brain Cerebellum | EPHA3 | T  | 1.93534E-05 | -0.304517 | 0.000131411 |
| rs73146965        | 3 | 89552553 | GTEEx/v8 | Artery Tibial    | EPHA3 | G  | 1.95703E-05 | 0.137552  | 7.80657E-07 |
| rs2117138         | 3 | 89531522 | GTEEx/v8 | Artery Tibial    | EPHA3 | G  | 1.98743E-05 | 0.138908  | 7.80657E-07 |
| rs1398532         | 3 | 89367901 | GTEEx/v8 | Artery Tibial    | EPHA3 | C  | 1.98916E-05 | 0.120029  | 7.80657E-07 |
| rs59969878        | 3 | 89369856 | GTEEx/v8 | Artery Tibial    | EPHA3 | A  | 1.98916E-05 | 0.120029  | 7.80657E-07 |
| rs9833400         | 3 | 89389507 | GTEEx/v8 | Artery Tibial    | EPHA3 | G  | 2.02599E-05 | 0.120321  | 7.80657E-07 |
| rs2048518         | 3 | 89533905 | GTEEx/v8 | Artery Tibial    | EPHA3 | C  | 2.06431E-05 | 0.136366  | 7.80657E-07 |
| rs2048520         | 3 | 89534248 | GTEEx/v8 | Artery Tibial    | EPHA3 | C  | 2.06431E-05 | 0.136366  | 7.80657E-07 |
| rs2048521         | 3 | 89534253 | GTEEx/v8 | Artery Tibial    | EPHA3 | A  | 2.06431E-05 | 0.136366  | 7.80657E-07 |
| rs73144998        | 3 | 89534592 | GTEEx/v8 | Artery Tibial    | EPHA3 | T  | 2.06431E-05 | 0.136366  | 7.80657E-07 |
| rs73145002        | 3 | 89537618 | GTEEx/v8 | Artery Tibial    | EPHA3 | C  | 2.06431E-05 | 0.136366  | 7.80657E-07 |
| rs13316356        | 3 | 89309959 | GTEEx/v8 | Brain Cerebellum | EPHA3 | A  | 2.07124E-05 | -0.291246 | 0.000131411 |

|                    |   |          |          |                  |       |   |             |           |             |
|--------------------|---|----------|----------|------------------|-------|---|-------------|-----------|-------------|
| rs73145317         | 3 | 89583712 | GTEEx/v8 | Artery Tibial    | EPHA3 | C | 2.08052E-05 | 0.161437  | 7.80657E-07 |
| rs9864984          | 3 | 89428776 | GTEEx/v8 | Artery Tibial    | EPHA3 | T | 2.08171E-05 | 0.130228  | 7.80657E-07 |
| rs62275019         | 3 | 89433648 | GTEEx/v8 | Artery Tibial    | EPHA3 | G | 2.08171E-05 | 0.130228  | 7.80657E-07 |
| rs66499884         | 3 | 89659012 | GTEEx/v8 | Artery Tibial    | EPHA3 | G | 2.09777E-05 | 0.123858  | 7.80657E-07 |
| rs7644070          | 3 | 89370107 | GTEEx/v8 | Artery Tibial    | EPHA3 | A | 2.11239E-05 | 0.12014   | 7.80657E-07 |
| rs73153219         | 3 | 89625902 | GTEEx/v8 | Artery Tibial    | EPHA3 | T | 2.13843E-05 | 0.123247  | 7.80657E-07 |
| rs7635916          | 3 | 89633140 | GTEEx/v8 | Artery Tibial    | EPHA3 | A | 2.13843E-05 | 0.123247  | 7.80657E-07 |
| rs6551413          | 3 | 89640350 | GTEEx/v8 | Artery Tibial    | EPHA3 | G | 2.13843E-05 | 0.123247  | 7.80657E-07 |
| rs73153283         | 3 | 89732193 | GTEEx/v8 | Artery Tibial    | EPHA3 | T | 2.13896E-05 | 0.139189  | 7.80657E-07 |
| rs7619025          | 3 | 89368629 | GTEEx/v8 | Brain Cerebellum | EPHA3 | A | 2.14141E-05 | -0.269323 | 0.000131411 |
| rs7645408          | 3 | 89446132 | GTEEx/v8 | Artery Tibial    | EPHA3 | A | 2.14353E-05 | 0.130754  | 7.80657E-07 |
| rs28623022         | 3 | 89448936 | GTEEx/v8 | Artery Tibial    | EPHA3 | A | 2.14353E-05 | 0.130754  | 7.80657E-07 |
| rs17738248         | 3 | 89296363 | GTEEx/v8 | Brain Cerebellum | EPHA3 | A | 2.15453E-05 | -0.299737 | 0.000131411 |
| rs9832305          | 3 | 89392778 | GTEEx/v8 | Artery Tibial    | EPHA3 | C | 2.16588E-05 | 0.131238  | 7.80657E-07 |
| rs7632427          | 3 | 89534377 | GTEEx/v8 | Artery Tibial    | EPHA3 | C | 2.25104E-05 | 0.123488  | 7.80657E-07 |
| rs11918555         | 3 | 89541934 | GTEEx/v8 | Artery Tibial    | EPHA3 | T | 2.3178E-05  | 0.12223   | 7.80657E-07 |
| rs9825569          | 3 | 89431650 | GTEEx/v8 | Artery Tibial    | EPHA3 | C | 2.42845E-05 | 0.12901   | 7.80657E-07 |
| rs113450730        | 3 | 90135516 | GTEEx/v8 | Pancreas         | EPHA3 | G | 2.43056E-05 | 0.265272  | 3.49803E-07 |
| rs62275018         | 3 | 89423863 | GTEEx/v8 | Artery Tibial    | EPHA3 | G | 2.50397E-05 | 0.130801  | 7.80657E-07 |
| rs13076853         | 3 | 89382776 | GTEEx/v8 | Brain Cerebellum | EPHA3 | C | 2.50427E-05 | -0.266047 | 0.000131411 |
| 3:89924704_TG T    | 3 | 89924704 | GTEEx/v8 | Pancreas         | EPHA3 | T | 2.51441E-05 | 0.272398  | 3.49803E-07 |
| rs9868785          | 3 | 90066423 | GTEEx/v8 | Artery Tibial    | EPHA3 | A | 2.55363E-05 | 0.130904  | 7.80657E-07 |
| rs28675360         | 3 | 89386151 | GTEEx/v8 | Artery Tibial    | EPHA3 | T | 2.58705E-05 | 0.117655  | 7.80657E-07 |
| rs2175670          | 3 | 89343044 | GTEEx/v8 | Brain Cerebellum | EPHA3 | G | 2.59143E-05 | -0.28772  | 0.000131411 |
| rs9825569          | 3 | 89431650 | GTEEx/v8 | Pancreas         | EPHA3 | C | 2.60809E-05 | 0.232839  | 3.49803E-07 |
| rs66757381         | 3 | 89561048 | GTEEx/v8 | Artery Tibial    | EPHA3 | T | 2.63229E-05 | 0.121893  | 7.80657E-07 |
| rs724972           | 3 | 89581408 | GTEEx/v8 | Artery Tibial    | EPHA3 | T | 2.63229E-05 | 0.121893  | 7.80657E-07 |
| rs7652296          | 3 | 89587262 | GTEEx/v8 | Artery Tibial    | EPHA3 | G | 2.63229E-05 | 0.121893  | 7.80657E-07 |
| rs9990016          | 3 | 89364033 | GTEEx/v8 | Artery Tibial    | EPHA3 | A | 2.63903E-05 | 0.119686  | 7.80657E-07 |
| rs73153279         | 3 | 89727968 | GTEEx/v8 | Artery Tibial    | EPHA3 | C | 2.64971E-05 | 0.13768   | 7.80657E-07 |
| rs6776281          | 3 | 89290164 | GTEEx/v8 | Brain Cerebellum | EPHA3 | A | 2.65931E-05 | -0.292638 | 0.000131411 |
| rs13100388         | 3 | 89383148 | GTEEx/v8 | Artery Tibial    | EPHA3 | A | 2.66441E-05 | 0.117524  | 7.80657E-07 |
| rs12631313         | 3 | 89528461 | GTEEx/v8 | Artery Tibial    | EPHA3 | T | 2.69776E-05 | 0.136535  | 7.80657E-07 |
| rs7650466          | 3 | 89530358 | GTEEx/v8 | Artery Tibial    | EPHA3 | T | 2.69776E-05 | 0.136535  | 7.80657E-07 |
| rs9866959          | 3 | 89379935 | GTEEx/v8 | Artery Tibial    | EPHA3 | C | 2.77804E-05 | 0.116908  | 7.80657E-07 |
| rs9864984          | 3 | 89428776 | GTEEx/v8 | Pancreas         | EPHA3 | T | 2.79974E-05 | 0.233258  | 3.49803E-07 |
| rs62275019         | 3 | 89433648 | GTEEx/v8 | Pancreas         | EPHA3 | G | 2.79974E-05 | 0.233258  | 3.49803E-07 |
| rs73153260         | 3 | 89718078 | GTEEx/v8 | Artery Tibial    | EPHA3 | A | 2.82023E-05 | 0.15922   | 7.80657E-07 |
| rs35448293         | 3 | 89386010 | GTEEx/v8 | Artery Tibial    | EPHA3 | G | 2.82312E-05 | 0.117986  | 7.80657E-07 |
| rs1520596          | 3 | 89645542 | GTEEx/v8 | Artery Tibial    | EPHA3 | C | 2.8462E-05  | 0.121829  | 7.80657E-07 |
| rs9817553          | 3 | 89384566 | GTEEx/v8 | Artery Tibial    | EPHA3 | G | 2.90737E-05 | 0.117745  | 7.80657E-07 |
| rs35511518         | 3 | 89383683 | GTEEx/v8 | Artery Tibial    | EPHA3 | C | 2.90995E-05 | 0.116405  | 7.80657E-07 |
| rs60759140         | 3 | 89499848 | GTEEx/v8 | Artery Tibial    | EPHA3 | C | 2.91486E-05 | 0.136034  | 7.80657E-07 |
| rs73153266         | 3 | 89720111 | GTEEx/v8 | Brain Cerebellum | EPHA3 | G | 2.92949E-05 | -0.298481 | 0.000131411 |
| rs113288647        | 3 | 89720352 | GTEEx/v8 | Brain Cerebellum | EPHA3 | T | 2.92949E-05 | -0.298481 | 0.000131411 |
| rs73154925         | 3 | 89859312 | GTEEx/v8 | Artery Tibial    | EPHA3 | C | 2.94586E-05 | 0.138919  | 7.80657E-07 |
| rs2346836          | 3 | 89498096 | GTEEx/v8 | Artery Tibial    | EPHA3 | A | 2.9937E-05  | 0.136087  | 7.80657E-07 |
| rs59541469         | 3 | 89501671 | GTEEx/v8 | Artery Tibial    | EPHA3 | T | 2.9937E-05  | 0.136087  | 7.80657E-07 |
| 3:89502123_TT AG T | 3 | 89502123 | GTEEx/v8 | Artery Tibial    | EPHA3 | T | 2.9937E-05  | 0.136087  | 7.80657E-07 |
| rs6551450          | 3 | 90129328 | GTEEx/v8 | Artery Tibial    | EPHA3 | C | 3.03179E-05 | 0.12845   | 7.80657E-07 |
| rs9851954          | 3 | 89297904 | GTEEx/v8 | Artery Tibial    | EPHA3 | A | 3.07249E-05 | 0.131839  | 7.80657E-07 |
| rs73153260         | 3 | 89718078 | GTEEx/v8 | Brain Cerebellum | EPHA3 | A | 3.12578E-05 | -0.356663 | 0.000131411 |

|            |   |          |         |                  |       |   |             |           |             |
|------------|---|----------|---------|------------------|-------|---|-------------|-----------|-------------|
| rs73153252 | 3 | 89712192 | GTEx/v8 | Brain Cerebellum | EPHA3 | T | 3.13471E-05 | -0.294404 | 0.000131411 |
| rs7617395  | 3 | 89722541 | GTEx/v8 | Brain Cerebellum | EPHA3 | T | 3.13471E-05 | -0.294404 | 0.000131411 |
| rs1567731  | 3 | 89316027 | GTEx/v8 | Pancreas         | EPHA3 | T | 3.15741E-05 | 0.246698  | 3.49803E-07 |
| rs73141104 | 3 | 89508390 | GTEx/v8 | Artery Tibial    | EPHA3 | T | 3.18627E-05 | 0.136308  | 7.80657E-07 |
| rs9868782  | 3 | 89384121 | GTEx/v8 | Pancreas         | EPHA3 | A | 3.19825E-05 | 0.23913   | 3.49803E-07 |
| rs9310121  | 3 | 89378987 | GTEx/v8 | Artery Tibial    | EPHA3 | G | 3.20658E-05 | 0.117263  | 7.80657E-07 |
| rs6776281  | 3 | 89290164 | GTEx/v8 | Artery Tibial    | EPHA3 | A | 3.20719E-05 | 0.13161   | 7.80657E-07 |
| rs73153241 | 3 | 89695319 | GTEx/v8 | Artery Tibial    | EPHA3 | G | 3.42799E-05 | 0.137103  | 7.80657E-07 |
| rs73153258 | 3 | 89715585 | GTEx/v8 | Brain Cerebellum | EPHA3 | A | 3.43172E-05 | -0.298648 | 0.000131411 |
| rs9310122  | 3 | 89379408 | GTEx/v8 | Artery Tibial    | EPHA3 | G | 3.45233E-05 | 0.117072  | 7.80657E-07 |
| rs60243237 | 3 | 89694053 | GTEx/v8 | Artery Tibial    | EPHA3 | T | 3.53066E-05 | 0.120952  | 7.80657E-07 |
| rs6796339  | 3 | 89286159 | GTEx/v8 | Brain Cerebellum | EPHA3 | T | 3.56632E-05 | -0.28695  | 0.000131411 |
| rs62278161 | 3 | 89291713 | GTEx/v8 | Brain Cerebellum | EPHA3 | G | 3.56632E-05 | -0.28695  | 0.000131411 |
| rs58858051 | 3 | 89291909 | GTEx/v8 | Brain Cerebellum | EPHA3 | T | 3.56632E-05 | -0.28695  | 0.000131411 |
| rs6794975  | 3 | 89292824 | GTEx/v8 | Brain Cerebellum | EPHA3 | A | 3.56632E-05 | -0.28695  | 0.000131411 |
| rs4857497  | 3 | 89294149 | GTEx/v8 | Brain Cerebellum | EPHA3 | G | 3.56632E-05 | -0.28695  | 0.000131411 |
| rs9847087  | 3 | 89297308 | GTEx/v8 | Brain Cerebellum | EPHA3 | G | 3.56632E-05 | -0.28695  | 0.000131411 |
| rs17026816 | 3 | 89297593 | GTEx/v8 | Brain Cerebellum | EPHA3 | G | 3.56632E-05 | -0.28695  | 0.000131411 |
| rs9851954  | 3 | 89297904 | GTEx/v8 | Brain Cerebellum | EPHA3 | A | 3.56632E-05 | -0.28695  | 0.000131411 |
| rs6786204  | 3 | 89298813 | GTEx/v8 | Brain Cerebellum | EPHA3 | C | 3.56632E-05 | -0.28695  | 0.000131411 |
| rs6773815  | 3 | 89299059 | GTEx/v8 | Brain Cerebellum | EPHA3 | T | 3.56632E-05 | -0.28695  | 0.000131411 |
| rs9862195  | 3 | 89299752 | GTEx/v8 | Brain Cerebellum | EPHA3 | T | 3.56632E-05 | -0.28695  | 0.000131411 |
| rs62278166 | 3 | 89300779 | GTEx/v8 | Brain Cerebellum | EPHA3 | G | 3.56632E-05 | -0.28695  | 0.000131411 |
| rs62278170 | 3 | 89302617 | GTEx/v8 | Brain Cerebellum | EPHA3 | T | 3.56632E-05 | -0.28695  | 0.000131411 |
| rs28834186 | 3 | 89305272 | GTEx/v8 | Brain Cerebellum | EPHA3 | A | 3.56632E-05 | -0.28695  | 0.000131411 |
| rs62278171 | 3 | 89305928 | GTEx/v8 | Brain Cerebellum | EPHA3 | A | 3.56632E-05 | -0.28695  | 0.000131411 |
| rs9863058  | 3 | 89322805 | GTEx/v8 | Pancreas         | EPHA3 | T | 3.69984E-05 | 0.241311  | 3.49803E-07 |
| rs6800041  | 3 | 89448196 | GTEx/v8 | Pancreas         | EPHA3 | C | 3.74788E-05 | 0.228794  | 3.49803E-07 |
| rs9310120  | 3 | 89378413 | GTEx/v8 | Artery Tibial    | EPHA3 | C | 3.90585E-05 | 0.11677   | 7.80657E-07 |
| rs12714734 | 3 | 90107488 | GTEx/v8 | Brain Cerebellum | EPHA3 | C | 3.96629E-05 | -0.310278 | 0.000131411 |
| rs9877921  | 3 | 90108491 | GTEx/v8 | Brain Cerebellum | EPHA3 | T | 3.96629E-05 | -0.310278 | 0.000131411 |
| rs9816940  | 3 | 90146579 | GTEx/v8 | Brain Cerebellum | EPHA3 | T | 3.96629E-05 | -0.310278 | 0.000131411 |
| rs9837548  | 3 | 90156142 | GTEx/v8 | Brain Cerebellum | EPHA3 | T | 3.96629E-05 | -0.310278 | 0.000131411 |
| rs6551451  | 3 | 90156286 | GTEx/v8 | Artery Tibial    | EPHA3 | T | 4.00647E-05 | 0.126988  | 7.80657E-07 |
| rs12152372 | 3 | 89500365 | GTEx/v8 | Artery Tibial    | EPHA3 | C | 4.02235E-05 | 0.132899  | 7.80657E-07 |
| rs2881488  | 3 | 89500488 | GTEx/v8 | Artery Tibial    | EPHA3 | G | 4.13729E-05 | 0.132921  | 7.80657E-07 |
| rs9846844  | 3 | 89379639 | GTEx/v8 | Artery Tibial    | EPHA3 | A | 4.16688E-05 | 0.115754  | 7.80657E-07 |
| rs73154916 | 3 | 89803713 | GTEx/v8 | Artery Tibial    | EPHA3 | T | 4.24218E-05 | 0.136449  | 7.80657E-07 |
| rs73139302 | 3 | 89508186 | GTEx/v8 | Artery Tibial    | EPHA3 | G | 4.3432E-05  | 0.133646  | 7.80657E-07 |
| rs62278170 | 3 | 89302617 | GTEx/v8 | Artery Tibial    | EPHA3 | T | 4.39208E-05 | 0.129245  | 7.80657E-07 |
| rs28834186 | 3 | 89305272 | GTEx/v8 | Artery Tibial    | EPHA3 | A | 4.39208E-05 | 0.129245  | 7.80657E-07 |
| rs62278171 | 3 | 89305928 | GTEx/v8 | Artery Tibial    | EPHA3 | A | 4.39208E-05 | 0.129245  | 7.80657E-07 |
| rs73139290 | 3 | 89505343 | GTEx/v8 | Artery Tibial    | EPHA3 | A | 4.46616E-05 | 0.133674  | 7.80657E-07 |
| rs73139296 | 3 | 89505734 | GTEx/v8 | Artery Tibial    | EPHA3 | T | 4.46616E-05 | 0.133674  | 7.80657E-07 |
| rs1157608  | 3 | 89506464 | GTEx/v8 | Artery Tibial    | EPHA3 | G | 4.46616E-05 | 0.133674  | 7.80657E-07 |
| rs10470576 | 3 | 90154964 | GTEx/v8 | Artery Tibial    | EPHA3 | T | 4.6124E-05  | 0.126504  | 7.80657E-07 |
| rs62278161 | 3 | 89291713 | GTEx/v8 | Artery Tibial    | EPHA3 | G | 4.63024E-05 | 0.129185  | 7.80657E-07 |
| rs58858051 | 3 | 89291909 | GTEx/v8 | Artery Tibial    | EPHA3 | T | 4.63024E-05 | 0.129185  | 7.80657E-07 |

|             |   |          |          |                  |        |      |             |           |             |
|-------------|---|----------|----------|------------------|--------|------|-------------|-----------|-------------|
| rs4857497   | 3 | 89294149 | GTEEx/v8 | Artery Tibial    | EPHA3  | G    | 4.63024E-05 | 0.129185  | 7.80657E-07 |
| rs9847087   | 3 | 89297308 | GTEEx/v8 | Artery Tibial    | EPHA3  | G    | 4.63024E-05 | 0.129185  | 7.80657E-07 |
| rs17026816  | 3 | 89297593 | GTEEx/v8 | Artery Tibial    | EPHA3  | G    | 4.63024E-05 | 0.129185  | 7.80657E-07 |
| rs6786204   | 3 | 89298813 | GTEEx/v8 | Artery Tibial    | EPHA3  | C    | 4.63024E-05 | 0.129185  | 7.80657E-07 |
| rs6773815   | 3 | 89299059 | GTEEx/v8 | Artery Tibial    | EPHA3  | T    | 4.63024E-05 | 0.129185  | 7.80657E-07 |
| rs9862195   | 3 | 89299752 | GTEEx/v8 | Artery Tibial    | EPHA3  | T    | 4.63024E-05 | 0.129185  | 7.80657E-07 |
| rs6419884   | 3 | 89279467 | GTEEx/v8 | Artery Tibial    | EPHA3  | T    | 4.90317E-05 | -0.120956 | 7.80657E-07 |
| rs9811041   | 3 | 89367555 | GTEEx/v8 | Artery Tibial    | EPHA3  | A    | 4.97505E-05 | 0.115675  | 7.80657E-07 |
| rs9864344   | 3 | 90121955 | GTEEx/v8 | Artery Tibial    | EPHA3  | G    | 5.13438E-05 | 0.124283  | 7.80657E-07 |
| rs9880313   | 3 | 89373637 | GTEEx/v8 | Artery Tibial    | EPHA3  | G    | 5.25287E-05 | 0.111212  | 7.80657E-07 |
| rs6796339   | 3 | 89286159 | GTEEx/v8 | Artery Tibial    | EPHA3  | T    | 5.25489E-05 | 0.128922  | 7.80657E-07 |
| rs2175670   | 3 | 89343044 | GTEEx/v8 | Artery Tibial    | EPHA3  | G    | 5.32925E-05 | 0.128139  | 7.80657E-07 |
| rs62278164  | 3 | 89292567 | GTEEx/v8 | Pancreas         | EPHA3  | C    | 5.51258E-05 | 0.241565  | 3.49803E-07 |
| rs9883541   | 3 | 89294657 | GTEEx/v8 | Pancreas         | EPHA3  | C    | 5.51258E-05 | 0.241565  | 3.49803E-07 |
| rs6800041   | 3 | 89448196 | GTEEx/v8 | Artery Tibial    | EPHA3  | C    | 5.5413E-05  | 0.123822  | 7.80657E-07 |
| rs2137488   | 3 | 89308704 | GTEEx/v8 | Pancreas         | EPHA3  | G    | 5.58479E-05 | 0.239656  | 3.49803E-07 |
| rs9829401   | 3 | 89300610 | GTEEx/v8 | Artery Tibial    | EPHA3  | C    | 5.604E-05   | 0.126952  | 7.80657E-07 |
| rs6768381   | 3 | 89358071 | GTEEx/v8 | Brain Cerebellum | EPHA3  | C    | 5.66641E-05 | -0.254543 | 0.000131411 |
| rs13316356  | 3 | 89309959 | GTEEx/v8 | Artery Tibial    | EPHA3  | A    | 5.8345E-05  | 0.127116  | 7.80657E-07 |
| rs62274982  | 3 | 89310731 | GTEEx/v8 | Pancreas         | EPHA3  | A    | 5.89355E-05 | 0.238939  | 3.49803E-07 |
| rs9866618   | 3 | 89319577 | GTEEx/v8 | Pancreas         | EPHA3  | C    | 5.89355E-05 | 0.238939  | 3.49803E-07 |
| rs62274614  | 3 | 89159719 | GTEEx/v8 | Lung             | CGGBP1 | T    | 5.98457E-05 | 0.159774  | 1.81917E-48 |
| rs73153266  | 3 | 89720111 | GTEEx/v8 | Artery Tibial    | EPHA3  | G    | 5.98562E-05 | 0.131977  | 7.80657E-07 |
| rs1912965   | 3 | 89518332 | GTEEx/v8 | Artery Tibial    | EPHA3  | G    | 6.09446E-05 | 0.13059   | 7.80657E-07 |
| rs113141104 | 3 | 89519238 | GTEEx/v8 | Artery Tibial    | EPHA3  | T    | 6.09446E-05 | 0.13059   | 7.80657E-07 |
| rs73139105  | 3 | 89519651 | GTEEx/v8 | Artery Tibial    | EPHA3  | C    | 6.09446E-05 | 0.13059   | 7.80657E-07 |
| rs112297761 | 3 | 89521602 | GTEEx/v8 | Artery Tibial    | EPHA3  | TC   | 6.09446E-05 | 0.13059   | 7.80657E-07 |
| rs73139119  | 3 | 89522285 | GTEEx/v8 | Artery Tibial    | EPHA3  | T    | 6.09446E-05 | 0.13059   | 7.80657E-07 |
| rs73139121  | 3 | 89522433 | GTEEx/v8 | Artery Tibial    | EPHA3  | G    | 6.09446E-05 | 0.13059   | 7.80657E-07 |
| rs73139131  | 3 | 89524686 | GTEEx/v8 | Artery Tibial    | EPHA3  | G    | 6.09446E-05 | 0.13059   | 7.80657E-07 |
| rs11397577  | 3 | 90081678 | GTEEx/v8 | Artery Tibial    | EPHA3  | AT   | 6.18786E-05 | 0.12282   | 7.80657E-07 |
| rs35124509  | 3 | 89521693 | GTEEx/v8 | Artery Tibial    | EPHA3  | C    | 6.27184E-05 | 0.115674  | 7.80657E-07 |
| rs9829401   | 3 | 89300610 | GTEEx/v8 | Brain Cerebellum | EPHA3  | C    | 6.43403E-05 | -0.278778 | 0.000131411 |
| rs73153258  | 3 | 89715585 | GTEEx/v8 | Artery Tibial    | EPHA3  | A    | 6.46822E-05 | 0.132007  | 7.80657E-07 |
| rs113288647 | 3 | 89720352 | GTEEx/v8 | Artery Tibial    | EPHA3  | T    | 6.46822E-05 | 0.132007  | 7.80657E-07 |
| rs62278166  | 3 | 89300779 | GTEEx/v8 | Artery Tibial    | EPHA3  | G    | 6.53018E-05 | 0.126675  | 7.80657E-07 |
| rs9848971   | 3 | 89279394 | GTEEx/v8 | Pancreas         | EPHA3  | G    | 6.80201E-05 | 0.237246  | 3.49803E-07 |
| rs62274986  | 3 | 89327148 | GTEEx/v8 | Pancreas         | EPHA3  | A    | 6.81299E-05 | 0.236006  | 3.49803E-07 |
| rs138643396 | 3 | 89698092 | GTEEx/v8 | Artery Tibial    | EPHA3  | CATA | 6.83504E-05 | 0.115926  | 7.80657E-07 |
| rs9849053   | 3 | 90152502 | GTEEx/v8 | Artery Tibial    | EPHA3  | A    | 6.87755E-05 | 0.123791  | 7.80657E-07 |
| rs6768381   | 3 | 89358071 | GTEEx/v8 | Artery Tibial    | EPHA3  | C    | 6.90531E-05 | 0.112763  | 7.80657E-07 |
| rs73139281  | 3 | 89503890 | GTEEx/v8 | Artery Tibial    | EPHA3  | T    | 6.91831E-05 | 0.129367  | 7.80657E-07 |
| rs73139284  | 3 | 89503958 | GTEEx/v8 | Artery Tibial    | EPHA3  | G    | 6.91831E-05 | 0.129367  | 7.80657E-07 |
| rs7632502   | 3 | 89469453 | GTEEx/v8 | Pancreas         | EPHA3  | A    | 6.92594E-05 | 0.197124  | 3.49803E-07 |
| rs112604674 | 3 | 89989681 | GTEEx/v8 | Brain Cerebellum | EPHA3  | T    | 6.99043E-05 | -0.338171 | 0.000131411 |
| rs62278163  | 3 | 89291836 | GTEEx/v8 | Pancreas         | EPHA3  | T    | 7.08915E-05 | 0.237296  | 3.49803E-07 |
| rs6786328   | 3 | 89298926 | GTEEx/v8 | Pancreas         | EPHA3  | G    | 7.08915E-05 | 0.237296  | 3.49803E-07 |
| rs62278168  | 3 | 89301573 | GTEEx/v8 | Pancreas         | EPHA3  | G    | 7.08915E-05 | 0.237296  | 3.49803E-07 |
| rs7637504   | 3 | 89702469 | GTEEx/v8 | Artery Tibial    | EPHA3  | T    | 7.31685E-05 | 0.11595   | 7.80657E-07 |
| rs6551415   | 3 | 89705161 | GTEEx/v8 | Artery Tibial    | EPHA3  | T    | 7.31685E-05 | 0.11595   | 7.80657E-07 |
| rs73139286  | 3 | 89504295 | GTEEx/v8 | Artery Tibial    | EPHA3  | A    | 7.60748E-05 | 0.129484  | 7.80657E-07 |
| rs62274981  | 3 | 89310605 | GTEEx/v8 | Pancreas         | EPHA3  | T    | 7.6395E-05  | 0.234437  | 3.49803E-07 |
| rs17800347  | 3 | 89314429 | GTEEx/v8 | Pancreas         | EPHA3  | G    | 7.6395E-05  | 0.234437  | 3.49803E-07 |

|             |   |          |          |                  |        |   |             |           |             |
|-------------|---|----------|----------|------------------|--------|---|-------------|-----------|-------------|
| rs993186    | 3 | 89314862 | GTEEx/v8 | Pancreas         | EPHA3  | G | 7.6395E-05  | 0.234437  | 3.49803E-07 |
| rs17800551  | 3 | 89317315 | GTEEx/v8 | Pancreas         | EPHA3  | T | 7.6395E-05  | 0.234437  | 3.49803E-07 |
| rs62274984  | 3 | 89318317 | GTEEx/v8 | Pancreas         | EPHA3  | A | 7.6395E-05  | 0.234437  | 3.49803E-07 |
| rs7617395   | 3 | 89722541 | GTEEx/v8 | Artery Tibial    | EPHA3  | T | 8.13187E-05 | 0.130073  | 7.80657E-07 |
| rs7650184   | 3 | 89530057 | GTEEx/v8 | Artery Tibial    | EPHA3  | A | 8.18324E-05 | 0.114079  | 7.80657E-07 |
| rs73154916  | 3 | 89803713 | GTEEx/v8 | Brain Cerebellum | EPHA3  | T | 8.21604E-05 | -0.287448 | 0.000131411 |
| rs73154925  | 3 | 89859312 | GTEEx/v8 | Brain Cerebellum | EPHA3  | C | 8.21604E-05 | -0.287448 | 0.000131411 |
| rs9832305   | 3 | 89392778 | GTEEx/v8 | Pancreas         | EPHA3  | C | 8.51643E-05 | 0.219124  | 3.49803E-07 |
| rs4857502   | 3 | 89324919 | GTEEx/v8 | Pancreas         | EPHA3  | A | 8.79202E-05 | 0.231574  | 3.49803E-07 |
| rs2137487   | 3 | 89325520 | GTEEx/v8 | Pancreas         | EPHA3  | G | 8.79202E-05 | 0.231574  | 3.49803E-07 |
| rs9875278   | 3 | 89335463 | GTEEx/v8 | Pancreas         | EPHA3  | T | 8.79202E-05 | 0.231574  | 3.49803E-07 |
| rs9821666   | 3 | 89339548 | GTEEx/v8 | Pancreas         | EPHA3  | T | 8.79202E-05 | 0.231574  | 3.49803E-07 |
| rs1512908   | 3 | 89340134 | GTEEx/v8 | Pancreas         | EPHA3  | A | 8.79202E-05 | 0.231574  | 3.49803E-07 |
| rs9852380   | 3 | 89341738 | GTEEx/v8 | Pancreas         | EPHA3  | G | 8.79202E-05 | 0.231574  | 3.49803E-07 |
| rs9852722   | 3 | 89341946 | GTEEx/v8 | Pancreas         | EPHA3  | C | 8.79202E-05 | 0.231574  | 3.49803E-07 |
| rs59381722  | 3 | 89701482 | GTEEx/v8 | Artery Tibial    | EPHA3  | G | 9.00303E-05 | 0.113931  | 7.80657E-07 |
| rs9877833   | 3 | 90138312 | GTEEx/v8 | Artery Tibial    | EPHA3  | A | 9.26656E-05 | 0.124891  | 7.80657E-07 |
| rs6794975   | 3 | 89292824 | GTEEx/v8 | Artery Tibial    | EPHA3  | A | 9.30529E-05 | 0.123722  | 7.80657E-07 |
| rs73153262  | 3 | 89719269 | GTEEx/v8 | Artery Tibial    | EPHA3  | T | 9.40759E-05 | 0.128978  | 7.80657E-07 |
| rs3792572   | 3 | 89456555 | GTEEx/v8 | Pancreas         | EPHA3  | A | 9.54529E-05 | 0.195036  | 3.49803E-07 |
| rs6806912   | 3 | 89751353 | GTEEx/v8 | Artery Tibial    | EPHA3  | C | 9.74849E-05 | 0.114539  | 7.80657E-07 |
| rs9862638   | 3 | 89373598 | GTEEx/v8 | Brain Cerebellum | EPHA3  | C | 9.82701E-05 | -0.238562 | 0.000131411 |
| rs7637642   | 3 | 90034785 | GTEEx/v8 | Artery Tibial    | EPHA3  | G | 9.98799E-05 | 0.119569  | 7.80657E-07 |
| rs6796339   | 3 | 89286159 | GTEEx/v8 | Pancreas         | EPHA3  | T | 9.99846E-05 | 0.227202  | 3.49803E-07 |
| rs62278161  | 3 | 89291713 | GTEEx/v8 | Pancreas         | EPHA3  | G | 9.99846E-05 | 0.227202  | 3.49803E-07 |
| rs58858051  | 3 | 89291909 | GTEEx/v8 | Pancreas         | EPHA3  | T | 9.99846E-05 | 0.227202  | 3.49803E-07 |
| rs4857497   | 3 | 89294149 | GTEEx/v8 | Pancreas         | EPHA3  | G | 9.99846E-05 | 0.227202  | 3.49803E-07 |
| rs9847087   | 3 | 89297308 | GTEEx/v8 | Pancreas         | EPHA3  | G | 9.99846E-05 | 0.227202  | 3.49803E-07 |
| rs17026816  | 3 | 89297593 | GTEEx/v8 | Pancreas         | EPHA3  | G | 9.99846E-05 | 0.227202  | 3.49803E-07 |
| rs6786204   | 3 | 89298813 | GTEEx/v8 | Pancreas         | EPHA3  | C | 9.99846E-05 | 0.227202  | 3.49803E-07 |
| rs6773815   | 3 | 89299059 | GTEEx/v8 | Pancreas         | EPHA3  | T | 9.99846E-05 | 0.227202  | 3.49803E-07 |
| rs9862195   | 3 | 89299752 | GTEEx/v8 | Pancreas         | EPHA3  | T | 9.99846E-05 | 0.227202  | 3.49803E-07 |
| rs7619025   | 3 | 89368629 | GTEEx/v8 | Artery Tibial    | EPHA3  | A | 0.000102538 | 0.110193  | 7.80657E-07 |
| rs28620812  | 3 | 89305668 | GTEEx/v8 | Pancreas         | EPHA3  | T | 0.000103808 | 0.232001  | 3.49803E-07 |
| rs62278172  | 3 | 89306038 | GTEEx/v8 | Pancreas         | EPHA3  | A | 0.000103808 | 0.232001  | 3.49803E-07 |
| rs954964    | 3 | 89355632 | GTEEx/v8 | Artery Tibial    | EPHA3  | G | 0.000104111 | 0.108869  | 7.80657E-07 |
| rs1398534   | 3 | 89329307 | GTEEx/v8 | Pancreas         | EPHA3  | G | 0.000104464 | 0.229195  | 3.49803E-07 |
| rs6794975   | 3 | 89292824 | GTEEx/v8 | Pancreas         | EPHA3  | A | 0.000105087 | 0.223728  | 3.49803E-07 |
| rs4396913   | 3 | 90047036 | GTEEx/v8 | Pancreas         | EPHA3  | C | 0.000105226 | 0.237452  | 3.49803E-07 |
| rs1464463   | 3 | 90056380 | GTEEx/v8 | Pancreas         | EPHA3  | A | 0.000105226 | 0.237452  | 3.49803E-07 |
| rs73153252  | 3 | 89712192 | GTEEx/v8 | Artery Tibial    | EPHA3  | T | 0.000109319 | 0.128448  | 7.80657E-07 |
| rs73151380  | 3 | 90000532 | GTEEx/v8 | Artery Tibial    | EPHA3  | T | 0.000111011 | 0.144157  | 7.80657E-07 |
| rs13323078  | 3 | 89168325 | GTEEx/v8 | Testis           | CGGBP1 | A | 0.000111676 | 0.139843  | 4.33153E-08 |
| rs28708984  | 3 | 90041154 | GTEEx/v8 | Artery Tibial    | EPHA3  | G | 0.000115862 | 0.118686  | 7.80657E-07 |
| rs61039064  | 3 | 90044732 | GTEEx/v8 | Artery Tibial    | EPHA3  | G | 0.000115862 | 0.118686  | 7.80657E-07 |
| rs35968370  | 3 | 89466339 | GTEEx/v8 | Pancreas         | EPHA3  | T | 0.000118817 | 0.193052  | 3.49803E-07 |
| rs11921985  | 3 | 89467357 | GTEEx/v8 | Pancreas         | EPHA3  | G | 0.000118817 | 0.193052  | 3.49803E-07 |
| rs4974358   | 3 | 90141506 | GTEEx/v8 | Artery Tibial    | EPHA3  | G | 0.000123858 | 0.123031  | 7.80657E-07 |
| rs7653735   | 3 | 89722185 | GTEEx/v8 | Artery Tibial    | EPHA3  | A | 0.000124606 | 0.112649  | 7.80657E-07 |
| rs11925143  | 3 | 89723684 | GTEEx/v8 | Artery Tibial    | EPHA3  | A | 0.000124606 | 0.112649  | 7.80657E-07 |
| rs112604674 | 3 | 89989681 | GTEEx/v8 | Artery Tibial    | EPHA3  | T | 0.000126338 | 0.143135  | 7.80657E-07 |
| rs112149405 | 3 | 89886780 | GTEEx/v8 | Artery Tibial    | EPHA3  | C | 0.000132367 | 0.150956  | 7.80657E-07 |
| rs9811041   | 3 | 89367555 | GTEEx/v8 | Brain Cerebellum | EPHA3  | A | 0.00013287  | -0.24166  | 0.000131411 |

|            |    |          |              |                   |        |    |             |            |                    |
|------------|----|----------|--------------|-------------------|--------|----|-------------|------------|--------------------|
| rs55787722 | 3  | 90012103 | GTEX/v8      | Brain Cerebellum  | EPHA3  | T  | 0.000144208 | -0.27232   | 0.000131411        |
| rs9839323  | 3  | 89190113 | GTEX/v8      | Testis            | CGGBP1 | A  | 0.000146528 | 0.137448   | 4.33153E-08        |
| rs6776281  | 3  | 89290164 | GTEX/v8      | Pancreas          | EPHA3  | A  | 0.000148275 | 0.221329   | 3.49803E-07        |
| rs9851954  | 3  | 89297904 | GTEX/v8      | Pancreas          | EPHA3  | A  | 0.000148275 | 0.221329   | 3.49803E-07        |
| rs9880313  | 3  | 89373637 | GTEX/v8      | Brain Cerebellum  | EPHA3  | G  | 0.000150532 | -0.230663  | 0.000131411        |
| rs67316928 | 3  | 89482234 | GTEX/v8      | Pancreas          | EPHA3  | C  | 0.000150556 | 0.194504   | 3.49803E-07        |
| rs1398531  | 3  | 89289709 | GTEX/v8      | Brain Cerebellum  | EPHA3  | T  | 0.000151381 | -0.264304  | 0.000131411        |
| rs13088663 | 3  | 89360266 | GTEX/v8      | Artery Tibial     | EPHA3  | T  | 0.000156515 | 0.105987   | 7.80657E-07        |
| rs55787722 | 3  | 90012103 | GTEX/v8      | Pancreas          | EPHA3  | T  | 0.000158209 | 0.240878   | 3.49803E-07        |
| rs12636275 | 3  | 89523038 | GTEX/v8      | Artery Tibial     | EPHA3  | A  | 0.000159547 | 0.109133   | 7.80657E-07        |
| rs6772953  | 3  | 89451721 | GTEX/v8      | Pancreas          | EPHA3  | C  | 0.000161016 | 0.188937   | 3.49803E-07        |
| rs62274614 | 3  | 89159719 | GTEX/v8      | Testis            | CGGBP1 | T  | 0.000161492 | 0.13353    | 4.33153E-08        |
| rs12714734 | 3  | 90107488 | GTEX/v8      | Pancreas          | EPHA3  | C  | 0.000165118 | 0.230208   | 3.49803E-07        |
| rs9877921  | 3  | 90108491 | GTEX/v8      | Pancreas          | EPHA3  | T  | 0.000165118 | 0.230208   | 3.49803E-07        |
| rs1512907  | 3  | 89355961 | GTEX/v8      | Brain Cerebellum  | EPHA3  | C  | 0.000169535 | -0.238335  | 0.000131411        |
| rs59127701 | 3  | 89291916 | GTEX/v8      | Pancreas          | EPHA3  | TA | 0.000172713 | 0.239554   | 3.49803E-07        |
| rs4396913  | 3  | 90047036 | GTEX/v8      | Brain Cerebellum  | EPHA3  | C  | 0.000182088 | -0.281997  | 0.000131411        |
| rs1464463  | 3  | 90056380 | GTEX/v8      | Brain Cerebellum  | EPHA3  | A  | 0.000182088 | -0.281997  | 0.000131411        |
| rs9866945  | 3  | 89349818 | GTEX/v8      | Brain Cerebellum  | EPHA3  | C  | 0.000185539 | -0.238202  | 0.000131411        |
| rs7613412  | 3  | 89724217 | GTEX/v8      | Artery Tibial     | EPHA3  | T  | 0.000188152 | 0.109455   | 7.80657E-07        |
| rs13076853 | 3  | 89382776 | GTEX/v8      | Artery Tibial     | EPHA3  | C  | 0.000197313 | 0.105664   | 7.80657E-07        |
| rs872976   | 3  | 89326991 | GTEX/v8      | Artery Tibial     | EPHA3  | A  | 0.000215792 | -0.103644  | 7.80657E-07        |
| rs1520594  | 3  | 89839468 | GTEX/v8      | Brain Cerebellum  | EPHA3  | A  | 0.000215974 | -0.235442  | 0.000131411        |
| rs9310117  | 3  | 89275906 | GTEX/v8      | Brain Cerebellum  | EPHA3  | C  | 0.000216519 | 0.238833   | 0.000131411        |
| rs6771336  | 3  | 89293015 | GTEX/v8      | Brain Cerebellum  | EPHA3  | T  | 0.000216519 | -0.238833  | 0.000131411        |
| rs62274987 | 3  | 89334443 | GTEX/v8      | Brain Cerebellum  | EPHA3  | A  | 0.000221208 | -0.23515   | 0.000131411        |
| rs67316928 | 3  | 89482234 | GTEX/v8      | Artery Tibial     | EPHA3  | C  | 0.000251611 | 0.106047   | 7.80657E-07        |
| rs59127701 | 3  | 89291916 | GTEX/v8      | Artery Tibial     | EPHA3  | TA | 0.000338775 | 0.122222   | 7.80657E-07        |
| rs60759458 | 3  | 90045885 | GTEX/v8      | Artery Tibial     | EPHA3  | C  | 0.000353926 | 0.110068   | 7.80657E-07        |
| rs1512907  | 3  | 89355961 | GTEX/v8      | Artery Tibial     | EPHA3  | C  | 0.000359544 | 0.101588   | 7.80657E-07        |
| rs13075167 | 3  | 89303172 | PsychEN CODE | PsychENCODE eQTLs | EPHA3  | C  | 0.000383092 | -0.0451166 | 0.0265128367062786 |
| rs6551410  | 3  | 89442305 | GTEX/v8      | Artery Tibial     | EPHA3  | A  | 0.000422515 | 0.101978   | 7.80657E-07        |
| rs13064615 | 3  | 89799433 | PsychEN CODE | PsychENCODE eQTLs | EPHA3  | G  | 0.00044599  | -0.0417326 | 0.0300805785656357 |
| rs7619303  | 3  | 89552554 | GTEX/v8      | Thyroid           | EPHA3  | A  | 0.000457637 | 0.10083    | 0.000440998        |
| rs62274987 | 3  | 89334443 | GTEX/v8      | Artery Tibial     | EPHA3  | A  | 0.000463358 | 0.100651   | 7.80657E-07        |
| rs55787722 | 3  | 90012103 | GTEX/v8      | Thyroid           | EPHA3  | T  | 0.000580418 | 0.101037   | 0.000440998        |
| rs4264747  | 3  | 89882102 | PsychEN CODE | PsychENCODE eQTLs | EPHA3  | G  | 0.000646709 | -0.0412393 | 0.0407642701527111 |
| rs6797260  | 3  | 89302486 | CMC          | CMC SVA cis       | EPHA3  | A  |             | 1.0        | 0.049              |
| rs13075167 | 3  | 89303172 | CMC          | CMC SVA cis       | EPHA3  | T  |             | 1.0        | 0.049              |
| rs12638746 | 3  | 89331055 | CMC          | CMC SVA cis       | EPHA3  | G  |             | 1.0        | 0.049              |
| rs2274224  | 10 | 96039597 | eQTLGen      | eQTLGen cis eQTLs | NOC3L  | C  | 2.3506E-168 | 27.6564    | 0.0                |
| rs11187838 | 10 | 96038686 | eQTLGen      | eQTLGen cis eQTLs | NOC3L  | A  | 2.7379E-167 | 27.5675    | 0.0                |
| rs10786156 | 10 | 96014622 | eQTLGen      | eQTLGen cis eQTLs | NOC3L  | G  | 9.0949E-166 | 27.4404    | 0.0                |
| rs57866767 | 10 | 96023077 | eQTLGen      | eQTLGen cis eQTLs | NOC3L  | C  | 5.1534E-165 | 27.3771    | 0.0                |
| rs7080472  | 10 | 96012950 | eQTLGen      | eQTLGen cis eQTLs | NOC3L  | T  | 1.1918E-164 | 27.3464    | 0.0                |
| rs3891783  | 10 | 96015793 | eQTLGen      | eQTLGen cis eQTLs | NOC3L  | G  | 2.3181E-163 | 27.2379    | 0.0                |
| rs2274224  | 10 | 96039597 | eQTLGen      | eQTLGen cis eQTLs | HELLS  | C  | 1.5774E-32  | 2.5062E+06 | 0.0                |



|             |    |          |         |                      |         |   |                             |            |     |
|-------------|----|----------|---------|----------------------|---------|---|-----------------------------|------------|-----|
| rs11187838  | 10 | 96038686 | eQTLGen | eQTLGen<br>cis eQTLs | HELLS   | A | 1.1038E-31                  | 1.9080E+06 | 0.0 |
| rs7080472   | 10 | 96012950 | eQTLGen | eQTLGen<br>cis eQTLs | HELLS   | T | 2.1997E-31                  | 1.6943E+06 | 0.0 |
| rs10786156  | 10 | 96014622 | eQTLGen | eQTLGen<br>cis eQTLs | HELLS   | G | 2.4504E-31                  | 1.6600E+06 | 0.0 |
| rs2077218   | 10 | 96071561 | eQTLGen | eQTLGen<br>cis eQTLs | HELLS   | G | 2.6229E-31                  | 1.6395E+06 | 0.0 |
| rs3891783   | 10 | 96015793 | eQTLGen | eQTLGen<br>cis eQTLs | HELLS   | G | 3.7006E-31                  | 1.5318E+06 | 0.0 |
| rs57866767  | 10 | 96023077 | eQTLGen | eQTLGen<br>cis eQTLs | HELLS   | C | 4.9097E-31                  | 1.4437E+06 | 0.0 |
| rs11187844  | 10 | 96056629 | eQTLGen | eQTLGen<br>cis eQTLs | HELLS   | A | 2.6845E-27                  | 2,3119E+06 | 0.0 |
| rs2077218   | 10 | 96071561 | eQTLGen | eQTLGen<br>cis eQTLs | TBC1D12 | G | 3.3973E-27                  | -10.8011   | 0.0 |
| rs79193572  | 10 | 96119713 | eQTLGen | eQTLGen<br>cis eQTLs | TBC1D12 | G | 2.1704E-26                  | 1,6059E+06 | 0.0 |
| rs74825688  | 10 | 96119687 | eQTLGen | eQTLGen<br>cis eQTLs | TBC1D12 | A | 2.2801E-26                  | 10.625     | 0.0 |
| rs113544984 | 10 | 96127448 | eQTLGen | eQTLGen<br>cis eQTLs | TBC1D12 | A | 2.8489E-26                  | 1,5138E+06 | 0.0 |
| rs11187906  | 10 | 96124838 | eQTLGen | eQTLGen<br>cis eQTLs | TBC1D12 | A | 3.4829E-26                  | 1,4448E+06 | 0.0 |
| rs10509672  | 10 | 96115957 | eQTLGen | eQTLGen<br>cis eQTLs | TBC1D12 | C | 3.8096E-26                  | 1,4145E+06 | 0.0 |
| rs7101207   | 10 | 96122857 | eQTLGen | eQTLGen<br>cis eQTLs | TBC1D12 | A | 4.1845E-26                  | 1,3816E+06 | 0.0 |
| rs79746649  | 10 | 96120218 | eQTLGen | eQTLGen<br>cis eQTLs | TBC1D12 | T | 4.2565E-26                  | 1,3761E+06 | 0.0 |
| rs11187907  | 10 | 96125361 | eQTLGen | eQTLGen<br>cis eQTLs | TBC1D12 | T | 5.3345E-26                  | 1,2987E+06 | 0.0 |
| rs11187890  | 10 | 96102758 | eQTLGen | eQTLGen<br>cis eQTLs | TBC1D12 | C | 5.7346E-26                  | 1,2739E+06 | 0.0 |
| rs11187897  | 10 | 96106603 | eQTLGen | eQTLGen<br>cis eQTLs | TBC1D12 | G | 6.6543E-26                  | 1,2231E+06 | 0.0 |
| rs11187895  | 10 | 96106240 | eQTLGen | eQTLGen<br>cis eQTLs | TBC1D12 | C | 8.3501E-26                  | 1,1449E+06 | 0.0 |
| rs12217792  | 10 | 96062386 | eQTLGen | eQTLGen<br>cis eQTLs | TBC1D12 | C | 2.4075E-25                  | 10.403     | 0.0 |
| rs112252876 | 10 | 96123355 | eQTLGen | eQTLGen<br>cis eQTLs | TBC1D12 | T | 2.4689E-25                  | 7,6948E+05 | 0.0 |
| rs11187883  | 10 | 96096866 | eQTLGen | eQTLGen<br>cis eQTLs | TBC1D12 | C | 4.22E-25                    | 5,8211E+05 | 0.0 |
| rs11187882  | 10 | 96095861 | eQTLGen | eQTLGen<br>cis eQTLs | TBC1D12 | C | 5.1026E-25                  | 5,1600E+05 | 0.0 |
| rs7096883   | 10 | 96069149 | eQTLGen | eQTLGen<br>cis eQTLs | TBC1D12 | A | 6.5107E-25                  | 4,2980E+05 | 0.0 |
| rs11187877  | 10 | 96092121 | eQTLGen | eQTLGen<br>cis eQTLs | TBC1D12 | A | 9.7611E-25                  | 2,8772E+05 | 0.0 |
| rs11187870  | 10 | 96087866 | eQTLGen | eQTLGen<br>cis eQTLs | TBC1D12 | C | 1.0962E-24                  | 2,4681E+05 | 0.0 |
| rs7100626   | 10 | 96069674 | eQTLGen | eQTLGen<br>cis eQTLs | TBC1D12 | A | 1.1616E-24                  | 2,2636E+05 | 0.0 |
| rs11187852  | 10 | 96070132 | eQTLGen | eQTLGen<br>cis eQTLs | TBC1D12 | A | 1.3016E-24                  | 1,8618E+05 | 0.0 |
| rs752140    | 10 | 96071396 | eQTLGen | eQTLGen<br>cis eQTLs | TBC1D12 | T | 1.3016E-24                  | 10.241     | 0.0 |
| rs75409190  | 10 | 96072425 | eQTLGen | eQTLGen<br>cis eQTLs | TBC1D12 | T | 1.4196E-24                  | 1,5514E+05 | 0.0 |
| rs11187864  | 10 | 96082506 | eQTLGen | eQTLGen<br>cis eQTLs | TBC1D12 | T | 1.4343E-24                  | 1,5222E+05 | 0.0 |
| rs11187856  | 10 | 96076869 | eQTLGen | eQTLGen<br>cis eQTLs | TBC1D12 | A | 1.4917E-24                  | 1,3797E+05 | 0.0 |
| rs11187866  | 10 | 96085991 | eQTLGen | eQTLGen<br>cis eQTLs | TBC1D12 | G | 1.9264E-24                  | 4,7392E+04 | 0.0 |
| rs11187863  | 10 | 96081457 | eQTLGen | eQTLGen<br>cis eQTLs | TBC1D12 | G | 2.1134E-24                  | 1,4154E+04 | 0.0 |
| rs11187840  | 10 | 96050351 | eQTLGen | eQTLGen<br>cis eQTLs | TBC1D12 | G | 2.3184E-24                  | 10.185     | 0.0 |
| rs75017201  | 10 | 96055152 | eQTLGen | eQTLGen<br>cis eQTLs | TBC1D12 | T | 3.1871E-24                  | 10.1538    | 0.0 |
| rs11187847  | 10 | 96063440 | eQTLGen | eQTLGen<br>cis eQTLs | TBC1D12 | G | 3.77E-24                    | 10.1376    | 0.0 |
| rs11187845  | 10 | 96060198 | eQTLGen | eQTLGen<br>cis eQTLs | TBC1D12 | A | 4.25360000000000<br>004E-24 | 10.1258    | 0.0 |
| rs3781266   | 10 | 96052747 | eQTLGen | eQTLGen<br>cis eQTLs | TBC1D12 | G | 1.5677E-23                  | 2,9492E+06 | 0.0 |
| rs3740365   | 10 | 96053239 | eQTLGen | eQTLGen<br>cis eQTLs | TBC1D12 | A | 2.2898E-23                  | 2,8115E+06 | 0.0 |
| rs753724    | 10 | 96051417 | eQTLGen | eQTLGen<br>cis eQTLs | TBC1D12 | T | 2.4225E-23                  | 2,7914E+06 | 0.0 |
| rs12220091  | 10 | 96053689 | eQTLGen | eQTLGen<br>cis eQTLs | TBC1D12 | T | 2.4371E-23                  | 2,7889E+06 | 0.0 |
| rs11187842  | 10 | 96052511 | eQTLGen | eQTLGen<br>cis eQTLs | TBC1D12 | T | 3.5754E-23                  | 2,6490E+06 | 0.0 |

|             |    |          |               |                     |         |      |             |            |                      |
|-------------|----|----------|---------------|---------------------|---------|------|-------------|------------|----------------------|
| rs7078844   | 10 | 96081140 | eQTLGen       | eQTLGen cis eQTLs   | HELLS   | T    | 4.4823E-23  | 2,5672E+06 | 0.0                  |
| rs3740359   | 10 | 96100119 | eQTLGen       | eQTLGen cis eQTLs   | TBC1D12 | T    | 6.3939E-22  | 9.623      | 0.0                  |
| rs3740360   | 10 | 96025491 | eQTLGen       | eQTLGen cis eQTLs   | TBC1D12 | C    | 1.301E-17   | 1,2917E+06 | 0.0                  |
| rs17109875  | 10 | 96026575 | eQTLGen       | eQTLGen cis eQTLs   | TBC1D12 | C    | 2.3589E-17  | 1,0404E+06 | 0.0                  |
| rs11187837  | 10 | 96035980 | eQTLGen       | eQTLGen cis eQTLs   | TBC1D12 | C    | 3.1089E-17  | 9,2245E+05 | 0.0                  |
| rs3891783   | 10 | 96015793 | eQTLcatalogue | BLUEPRINT ge T-cell | NOC3L   | C    | 8.90201E-17 | 0.0946773  | 4.451E-13            |
| rs2274224   | 10 | 96039597 | eQTLcatalogue | BLUEPRINT ge T-cell | NOC3L   | G    | 9.14876E-17 | 0.0946486  | 4.57438E-13          |
| rs10786156  | 10 | 96014622 | eQTLcatalogue | BLUEPRINT ge T-cell | NOC3L   | C    | 9.30907E-17 | 0.0946158  | 4.65454E-13          |
| rs11187838  | 10 | 96038686 | eQTLcatalogue | BLUEPRINT ge T-cell | NOC3L   | G    | 9.34357E-17 | 0.094607   | 4.67178E-13          |
| rs7080472   | 10 | 96012950 | BIOSQTL       | BIOS eQTL geneLevel | NOC3L   | T    | 1.2781E-16  | 8.2757861  | 0.0                  |
| rs11187838  | 10 | 96038686 | BIOSQTL       | BIOS eQTL geneLevel | NOC3L   | A    | 2.42798E-16 | 8.1989633  | 0.0                  |
| rs57866767  | 10 | 96023077 | BIOSQTL       | BIOS eQTL geneLevel | NOC3L   | C    | 3.3781E-16  | 8.1590575  | 0.0                  |
| rs10786156  | 10 | 96014622 | BIOSQTL       | BIOS eQTL geneLevel | NOC3L   | G    | 3.4918E-16  | 8.1550176  | 0.0                  |
| rs3891783   | 10 | 96015793 | BIOSQTL       | BIOS eQTL geneLevel | NOC3L   | G    | 3.4918E-16  | 8.1550176  | 0.0                  |
| rs7080472   | 10 | 96012950 | eQTLcatalogue | BLUEPRINT ge T-cell | NOC3L   | G    | 5.68476E-16 | 0.0922238  | 2.84238E-12          |
| rs3891783   | 10 | 96015793 | PsychENCODE   | PsychENCODE eQTLs   | NOC3L   | G    | 1.55666E-15 | 0.084497   | 6.05693225367462E-13 |
| rs7080472   | 10 | 96012950 | PsychENCODE   | PsychENCODE eQTLs   | NOC3L   | T    | 2.15698E-15 | 0.0843385  | 8.29043545618019E-13 |
| rs7096883   | 10 | 96069149 | eQTLcatalogue | GEUVADIS ge LCL     | PLCE1   | G    | 2.57371E-15 | 0.354412   | 1.28686E-11          |
| rs57866767  | 10 | 96023077 | PsychENCODE   | PsychENCODE eQTLs   | NOC3L   | C    | 2.91938E-15 | 0.0836983  | 1.10909695717759E-12 |
| rs11187847  | 10 | 96063440 | eQTLcatalogue | GEUVADIS ge LCL     | PLCE1   | C    | 3.28649E-15 | 0.347624   | 1.64325E-11          |
| rs11187842  | 10 | 96052511 | eQTLcatalogue | GEUVADIS ge LCL     | PLCE1   | C    | 3.77209E-15 | 0.34516    | 1.88605E-11          |
| rs3781266   | 10 | 96052747 | eQTLcatalogue | GEUVADIS ge LCL     | PLCE1   | A    | 3.77209E-15 | 0.34516    | 1.88605E-11          |
| rs3740365   | 10 | 96053239 | eQTLcatalogue | GEUVADIS ge LCL     | PLCE1   | T    | 3.77209E-15 | 0.34516    | 1.88605E-11          |
| rs12220091  | 10 | 96053689 | eQTLcatalogue | GEUVADIS ge LCL     | PLCE1   | C    | 3.77209E-15 | 0.34516    | 1.88605E-11          |
| rs11187845  | 10 | 96060198 | eQTLcatalogue | GEUVADIS ge LCL     | PLCE1   | C    | 4.8482E-15  | 0.34562    | 2.4241E-11           |
| rs11187826  | 10 | 95988042 | eQTLGen       | eQTLGen cis eQTLs   | HELLS   | G    | 6.9055E-15  | 2,1778E+06 | 0.0                  |
| rs7100626   | 10 | 96069674 | eQTLcatalogue | GEUVADIS ge LCL     | PLCE1   | C    | 1.44145E-14 | 0.356819   | 7.20725E-11          |
| rs11187852  | 10 | 96070132 | eQTLcatalogue | GEUVADIS ge LCL     | PLCE1   | G    | 1.44145E-14 | 0.356819   | 7.20725E-11          |
| rs11187877  | 10 | 96092121 | eQTLcatalogue | GEUVADIS ge LCL     | PLCE1   | G    | 1.44145E-14 | 0.356819   | 7.20725E-11          |
| rs3740360   | 10 | 96025491 | eQTLGen       | eQTLGen cis eQTLs   | HELLS   | C    | 1.6881E-14  | 1,7625E+06 | 0.0                  |
| rs11187863  | 10 | 96081457 | eQTLcatalogue | GEUVADIS ge LCL     | PLCE1   | T    | 1.87895E-14 | 0.336752   | 9.39475E-11          |
| rs11187866  | 10 | 96085991 | eQTLcatalogue | GEUVADIS ge LCL     | PLCE1   | C    | 1.87895E-14 | 0.336752   | 9.39475E-11          |
| rs11187883  | 10 | 96096866 | eQTLcatalogue | GEUVADIS ge LCL     | PLCE1   | T    | 1.87895E-14 | 0.336752   | 9.39475E-11          |
| rs17109875  | 10 | 96026575 | eQTLGen       | eQTLGen cis eQTLs   | HELLS   | C    | 1.9726E-14  | 1,6898E+06 | 0.0                  |
| rs752140    | 10 | 96071396 | eQTLcatalogue | GEUVADIS ge LCL     | PLCE1   | C    | 2.1749E-14  | 0.337652   | 1.08745E-10          |
| rs769015184 | 10 | 96049708 | eQTLcatalogue | GEUVADIS ge LCL     | PLCE1   | AC   | 2.76489E-14 | 0.339981   | 1.38245E-10          |
| rs11187840  | 10 | 96050351 | eQTLcatalogue | GEUVADIS ge LCL     | PLCE1   | A    | 2.76489E-14 | 0.339981   | 1.38245E-10          |
| rs75017201  | 10 | 96055152 | eQTLcatalogue | GEUVADIS ge LCL     | PLCE1   | C    | 2.76489E-14 | 0.339981   | 1.38245E-10          |
| rs34309017  | 10 | 96061619 | eQTLcatalogue | GEUVADIS ge LCL     | PLCE1   | ACTT | 3.52825E-14 | 0.340472   | 1.76413E-10          |
| rs12217792  | 10 | 96062386 | eQTLcatalogue | GEUVADIS ge LCL     | PLCE1   | T    | 3.52825E-14 | 0.340472   | 1.76413E-10          |
| rs11187906  | 10 | 96124838 | eQTLcatalogue | GEUVADIS ge LCL     | PLCE1   | T    | 4.8199E-14  | 0.36095    | 2.40995E-10          |
| rs113544984 | 10 | 96127448 | eQTLcatalogue | GEUVADIS ge LCL     | PLCE1   | C    | 4.8199E-14  | 0.36095    | 2.40995E-10          |
| rs75409190  | 10 | 96072425 | eQTLcatalogue | GEUVADIS ge LCL     | PLCE1   | C    | 5.25935E-14 | 0.351622   | 2.62967E-10          |

|             |    |          |               |                            |           |        |             |            |             |
|-------------|----|----------|---------------|----------------------------|-----------|--------|-------------|------------|-------------|
| rs771106747 | 10 | 96072873 | eQTLcatalogue | GEUVADISge LCL             | PLCE1     | CTA    | 5.25935E-14 | 0.351622   | 2.62967E-10 |
| rs749295068 | 10 | 96073508 | eQTLcatalogue | GEUVADISge LCL             | PLCE1     | AGAT   | 5.25935E-14 | 0.351622   | 2.62967E-10 |
| rs11187856  | 10 | 96076869 | eQTLcatalogue | GEUVADISge LCL             | PLCE1     | G      | 5.25935E-14 | 0.351622   | 2.62967E-10 |
| rs11187864  | 10 | 96082506 | eQTLcatalogue | GEUVADISge LCL             | PLCE1     | C      | 5.25935E-14 | 0.351622   | 2.62967E-10 |
| rs11187870  | 10 | 96087866 | eQTLcatalogue | GEUVADISge LCL             | PLCE1     | G      | 5.25935E-14 | 0.351622   | 2.62967E-10 |
| rs145707916 | 10 | 96092992 | eQTLcatalogue | GEUVADISge LCL             | PLCE1     | G      | 5.25935E-14 | 0.351622   | 2.62967E-10 |
| rs750148755 | 10 | 96095271 | eQTLcatalogue | GEUVADISge LCL             | PLCE1     | CATTTT | 5.25935E-14 | 0.351622   | 2.62967E-10 |
| rs11187882  | 10 | 96095861 | eQTLcatalogue | GEUVADISge LCL             | PLCE1     | A      | 5.25935E-14 | 0.351622   | 2.62967E-10 |
| rs10509672  | 10 | 96115957 | BIOSQTL       | BIOS eQTLgeneLevel         | TBC1D12   | C      | 5.63913E-14 | 7.5163545  | 0.0         |
| rs7078844   | 10 | 96081140 | eQTLGen       | eQTLGen cis eQTLs          | TBC1D12   | T      | 6.266E-14   | -7.5022    | 0.0         |
| rs74825688  | 10 | 96119687 | BIOSQTL       | BIOS eQTLgeneLevel         | TBC1D12   | A      | 6.33328E-14 | 7.501064   | 0.0         |
| rs79193572  | 10 | 96119713 | BIOSQTL       | BIOS eQTLgeneLevel         | TBC1D12   | G      | 6.33328E-14 | 7.501064   | 0.0         |
| rs79746649  | 10 | 96120218 | BIOSQTL       | BIOS eQTLgeneLevel         | TBC1D12   | T      | 6.33328E-14 | 7.501064   | 0.0         |
| rs11187890  | 10 | 96102758 | eQTLcatalogue | GEUVADISge LCL             | PLCE1     | T      | 6.3606E-14  | 0.358744   | 3.1803E-10  |
| rs11187890  | 10 | 96102758 | BIOSQTL       | BIOS eQTLgeneLevel         | TBC1D12   | C      | 6.43065E-14 | 7.4990833  | 0.0         |
| rs11187895  | 10 | 96106240 | BIOSQTL       | BIOS eQTLgeneLevel         | TBC1D12   | C      | 6.46015E-14 | 7.4985075  | 0.0         |
| rs11187897  | 10 | 96106603 | BIOSQTL       | BIOS eQTLgeneLevel         | TBC1D12   | G      | 6.46015E-14 | 7.4985075  | 0.0         |
| rs7101207   | 10 | 96122857 | eQTLcatalogue | GEUVADISge LCL             | PLCE1     | G      | 6.98985E-14 | 0.352103   | 3.49493E-10 |
| rs112252876 | 10 | 96123355 | eQTLcatalogue | GEUVADISge LCL             | PLCE1     | C      | 6.98985E-14 | 0.352103   | 3.49493E-10 |
| rs11187838  | 10 | 96038686 | PsychENCODE   | PsychENCODE eQTLs          | NOC3L     | A      | 7.16731E-14 | 0.0800871  | 2.4E-11     |
| rs113544984 | 10 | 96127448 | BIOSQTL       | BIOS eQTLgeneLevel         | TBC1D12   | A      | 9.62128E-14 | 7.4461691  | 0.0         |
| rs11187907  | 10 | 96125361 | BIOSQTL       | BIOS eQTLgeneLevel         | TBC1D12   | T      | 1.24034E-13 | 7.41242    | 0.0         |
| rs79746649  | 10 | 96120218 | eQTLcatalogue | GEUVADISge LCL             | PLCE1     | C      | 1.30501E-13 | 0.346373   | 6.52505E-10 |
| rs2274224   | 10 | 96039597 | GTEX/v8       | Cells Cultured fibroblasts | PLCE1-AS1 | C      | 1.4491E-13  | -0.223116  | 3.86001E-30 |
| rs200197176 | 10 | 96055963 | eQTLcatalogue | GEUVADISge LCL             | PLCE1     | C      | 1.62082E-13 | 0.325176   | 8.1041E-10  |
| rs7080472   | 10 | 96012950 | GTEX/v8       | Cells Cultured fibroblasts | PLCE1-AS1 | T      | 1.67957E-13 | -0.226956  | 3.86001E-30 |
| rs11187826  | 10 | 95988042 | eQTLcatalogue | GEUVADISge LCL             | PLCE1     | A      | 1.90711E-13 | 0.294603   | 9.53555E-10 |
| rs11187826  | 10 | 95988042 | eQTLGen       | eQTLGen cis eQTLs          | TBC1D12   | G      | 2.0948E-13  | 5,5791E+05 | 0.0         |
| rs7101207   | 10 | 96122857 | BIOSQTL       | BIOS eQTLgeneLevel         | TBC1D12   | A      | 2.40687E-13 | 7.3240743  | 0.0         |
| rs112252876 | 10 | 96123355 | BIOSQTL       | BIOS eQTLgeneLevel         | TBC1D12   | T      | 2.40687E-13 | 7.3240743  | 0.0         |
| rs2077218   | 10 | 96071561 | BIOSQTL       | BIOS eQTLgeneLevel         | TBC1D12   | G      | 2.68338E-13 | -7.30937   | 0.0         |
| rs3740360   | 10 | 96025491 | eQTLcatalogue | GEUVADISge LCL             | PLCE1     | A      | 2.69319E-13 | 0.304952   | 1.34659E-09 |
| rs17109875  | 10 | 96026575 | eQTLcatalogue | GEUVADISge LCL             | PLCE1     | T      | 2.69319E-13 | 0.304952   | 1.34659E-09 |
| rs11187837  | 10 | 96035980 | eQTLcatalogue | GEUVADISge LCL             | PLCE1     | T      | 2.69319E-13 | 0.304952   | 1.34659E-09 |
| rs113544984 | 10 | 96127448 | eQTLGen       | eQTLGen cis eQTLs          | PDLIM1    | A      | 2.9121E-13  | -7.2983    | 0.0         |
| rs10786156  | 10 | 96014622 | GTEX/v8       | Cells Cultured fibroblasts | PLCE1-AS1 | G      | 3.41914E-13 | -0.220278  | 3.86001E-30 |
| rs3891783   | 10 | 96015793 | GTEX/v8       | Cells Cultured fibroblasts | PLCE1-AS1 | G      | 3.41914E-13 | -0.220278  | 3.86001E-30 |
| rs57866767  | 10 | 96023077 | GTEX/v8       | Cells Cultured fibroblasts | PLCE1-AS1 | C      | 3.41914E-13 | -0.220278  | 3.86001E-30 |
| rs11187895  | 10 | 96106240 | eQTLcatalogue | GEUVADISge LCL             | PLCE1     | G      | 4.57228E-13 | 0.341015   | 2.28614E-09 |
| rs11187897  | 10 | 96106603 | eQTLcatalogue | GEUVADISge LCL             | PLCE1     | A      | 4.57228E-13 | 0.341015   | 2.28614E-09 |

|             |    |          |               |                                   |           |      |             |            |             |
|-------------|----|----------|---------------|-----------------------------------|-----------|------|-------------|------------|-------------|
| rs778275808 | 10 | 96114212 | eQTLcatalogue | GEUVADISge LCL                    | PLCE1     | TCTC | 4.57228E-13 | 0.341015   | 2.28614E-09 |
| rs10509672  | 10 | 96115957 | eQTLcatalogue | GEUVADISge LCL                    | PLCE1     | G    | 4.57228E-13 | 0.341015   | 2.28614E-09 |
| rs79193572  | 10 | 96119713 | eQTLcatalogue | GEUVADISge LCL                    | PLCE1     | A    | 4.57228E-13 | 0.341015   | 2.28614E-09 |
| rs11187837  | 10 | 96035980 | eQTLGen       | eQTLGen cis eQTLs                 | HELLS     | C    | 6.3849E-13  | 7.8530E+03 | 0.0         |
| rs3740359   | 10 | 96100119 | GTEXv8        | Cells Cultured fibroblasts        | PLCE1-AS1 | T    | 1.0708E-12  | -0.356669  | 3.86001E-30 |
| rs11187907  | 10 | 96125361 | eQTLGen       | eQTLGen cis eQTLs                 | PDLIM1    | T    | 1.0715E-12  | -7.121     | 0.0         |
| rs11187890  | 10 | 96102758 | eQTLcatalogue | BLUEPRINTge monocyte              | NOC3L     | T    | 1.08793E-12 | 0.300083   | 5.43965E-09 |
| rs778275808 | 10 | 96114212 | eQTLcatalogue | BLUEPRINTge monocyte              | NOC3L     | TCTC | 1.08984E-12 | 0.300056   | 5.4492E-09  |
| rs11187895  | 10 | 96106240 | eQTLcatalogue | BLUEPRINTge monocyte              | NOC3L     | G    | 1.09049E-12 | 0.300052   | 5.45245E-09 |
| rs11187897  | 10 | 96106603 | eQTLcatalogue | BLUEPRINTge monocyte              | NOC3L     | A    | 1.09049E-12 | 0.300052   | 5.45245E-09 |
| rs10509672  | 10 | 96115957 | eQTLcatalogue | BLUEPRINTge monocyte              | NOC3L     | G    | 1.09049E-12 | 0.300052   | 5.45245E-09 |
| rs74825688  | 10 | 96119687 | eQTLcatalogue | BLUEPRINTge monocyte              | NOC3L     | G    | 1.09049E-12 | 0.300052   | 5.45245E-09 |
| rs79193572  | 10 | 96119713 | eQTLcatalogue | BLUEPRINTge monocyte              | NOC3L     | A    | 1.09049E-12 | 0.300052   | 5.45245E-09 |
| rs11187863  | 10 | 96081457 | BIOSQTL       | BIOS eQTL geneLevel               | TBC1D12   | G    | 1.47096E-12 | 7.0772858  | 0.0         |
| rs11187864  | 10 | 96082506 | BIOSQTL       | BIOS eQTL geneLevel               | TBC1D12   | T    | 1.47096E-12 | 7.0772858  | 0.0         |
| rs11187866  | 10 | 96085991 | BIOSQTL       | BIOS eQTL geneLevel               | TBC1D12   | G    | 1.47096E-12 | 7.0772858  | 0.0         |
| rs11187870  | 10 | 96087866 | BIOSQTL       | BIOS eQTL geneLevel               | TBC1D12   | C    | 1.47096E-12 | 7.0772858  | 0.0         |
| rs11187877  | 10 | 96092121 | BIOSQTL       | BIOS eQTL geneLevel               | TBC1D12   | A    | 1.47096E-12 | 7.0772858  | 0.0         |
| rs11187895  | 10 | 96106240 | eQTLGen       | eQTLGen cis eQTLs                 | PDLIM1    | C    | 1.6108E-12  | -7.0644    | 0.0         |
| rs7100626   | 10 | 96069674 | BIOSQTL       | BIOS eQTL geneLevel               | TBC1D12   | A    | 1.61777E-12 | 7.0640675  | 0.0         |
| rs11187852  | 10 | 96070132 | BIOSQTL       | BIOS eQTL geneLevel               | TBC1D12   | A    | 1.61777E-12 | 7.0640675  | 0.0         |
| rs752140    | 10 | 96071396 | BIOSQTL       | BIOS eQTL geneLevel               | TBC1D12   | T    | 1.61777E-12 | 7.0640675  | 0.0         |
| rs75409190  | 10 | 96072425 | BIOSQTL       | BIOS eQTL geneLevel               | TBC1D12   | T    | 1.62477E-12 | 7.0635281  | 0.0         |
| rs11187856  | 10 | 96076869 | BIOSQTL       | BIOS eQTL geneLevel               | TBC1D12   | A    | 1.62477E-12 | 7.0635281  | 0.0         |
| rs11187882  | 10 | 96095861 | BIOSQTL       | BIOS eQTL geneLevel               | TBC1D12   | C    | 1.63181E-12 | 7.0629935  | 0.0         |
| rs11187883  | 10 | 96096866 | BIOSQTL       | BIOS eQTL geneLevel               | TBC1D12   | C    | 1.63181E-12 | 7.0629935  | 0.0         |
| rs11187906  | 10 | 96124838 | eQTLGen       | eQTLGen cis eQTLs                 | PDLIM1    | A    | 1.665E-12   | -7.06      | 0.0         |
| rs7080472   | 10 | 96012950 | GTEXv8        | Adrenal Gland                     | NOC3L     | T    | 1.68803E-12 | 0.425729   | 2.32596E-10 |
| rs79193572  | 10 | 96119713 | eQTLGen       | eQTLGen cis eQTLs                 | PDLIM1    | G    | 1.8573E-12  | -7.0447    | 0.0         |
| rs11187838  | 10 | 96038686 | GTEXv8        | Cells Cultured fibroblasts        | PLCE1-AS1 | A    | 1.92734E-12 | -0.211574  | 3.86001E-30 |
| rs11187897  | 10 | 96106603 | eQTLGen       | eQTLGen cis eQTLs                 | PDLIM1    | G    | 2.0772E-12  | -7.029     | 0.0         |
| rs74825688  | 10 | 96119687 | eQTLcatalogue | GEUVADISge LCL                    | PLCE1     | G    | 2.11766E-12 | 0.329638   | 1.05883E-08 |
| rs10509672  | 10 | 96115957 | eQTLGen       | eQTLGen cis eQTLs                 | PDLIM1    | C    | 2.2603E-12  | -7.0174    | 0.0         |
| rs74825688  | 10 | 96119687 | eQTLGen       | eQTLGen cis eQTLs                 | PDLIM1    | A    | 2.2831E-12  | -7.0159    | 0.0         |
| rs11187870  | 10 | 96087866 | eQTLGen       | eQTLGen cis eQTLs                 | PDLIM1    | C    | 2.5706E-12  | -6.9993    | 0.0         |
| rs11187890  | 10 | 96102758 | eQTLGen       | eQTLGen cis eQTLs                 | PDLIM1    | C    | 2.6602E-12  | -6.9945    | 0.0         |
| rs11187864  | 10 | 96082506 | GTEXv8        | Cells EBV-transformed lymphocytes | PLCE1     | T    | 2.83248E-12 | 0.986452   | 1.20882E-07 |
| rs11187870  | 10 | 96087866 | GTEXv8        | Cells EBV-transformed lymphocytes | PLCE1     | C    | 2.83248E-12 | 0.986452   | 1.20882E-07 |

|             |    |          |               |                                   |         |    |             |            |             |
|-------------|----|----------|---------------|-----------------------------------|---------|----|-------------|------------|-------------|
| rs11187877  | 10 | 96092121 | GTEEx/v8      | Cells EBV-transformed lymphocytes | PLCE1   | A  | 2.83248E-12 | 0.986452   | 1.20882E-07 |
| rs145707916 | 10 | 96092992 | GTEEx/v8      | Cells EBV-transformed lymphocytes | PLCE1   | GA | 2.83248E-12 | 0.986452   | 1.20882E-07 |
| rs750148755 | 10 | 96095271 | GTEEx/v8      | Cells EBV-transformed lymphocytes | PLCE1   | C  | 2.83248E-12 | 0.986452   | 1.20882E-07 |
| rs11187882  | 10 | 96095861 | GTEEx/v8      | Cells EBV-transformed lymphocytes | PLCE1   | C  | 2.83248E-12 | 0.986452   | 1.20882E-07 |
| rs11187890  | 10 | 96102758 | GTEEx/v8      | Cells EBV-transformed lymphocytes | PLCE1   | C  | 2.83248E-12 | 0.986452   | 1.20882E-07 |
| rs11187895  | 10 | 96106240 | GTEEx/v8      | Cells EBV-transformed lymphocytes | PLCE1   | C  | 2.83248E-12 | 0.986452   | 1.20882E-07 |
| rs11187897  | 10 | 96106603 | GTEEx/v8      | Cells EBV-transformed lymphocytes | PLCE1   | G  | 2.83248E-12 | 0.986452   | 1.20882E-07 |
| rs778275808 | 10 | 96114212 | GTEEx/v8      | Cells EBV-transformed lymphocytes | PLCE1   | T  | 2.83248E-12 | 0.986452   | 1.20882E-07 |
| rs10509672  | 10 | 96115957 | GTEEx/v8      | Cells EBV-transformed lymphocytes | PLCE1   | C  | 2.83248E-12 | 0.986452   | 1.20882E-07 |
| rs79193572  | 10 | 96119713 | GTEEx/v8      | Cells EBV-transformed lymphocytes | PLCE1   | G  | 2.83248E-12 | 0.986452   | 1.20882E-07 |
| rs79746649  | 10 | 96120218 | GTEEx/v8      | Cells EBV-transformed lymphocytes | PLCE1   | T  | 2.83248E-12 | 0.986452   | 1.20882E-07 |
| rs3891783   | 10 | 96015793 | GTEEx/v8      | Adrenal Gland                     | NOC3L   | G  | 3.25993E-12 | 0.407875   | 2.32596E-10 |
| rs57866767  | 10 | 96023077 | GTEEx/v8      | Adrenal Gland                     | NOC3L   | C  | 3.25993E-12 | 0.407875   | 2.32596E-10 |
| rs10786156  | 10 | 96014622 | GTEEx/v8      | Adrenal Gland                     | NOC3L   | G  | 3.32979E-12 | 0.40716    | 2.32596E-10 |
| rs2274224   | 10 | 96039597 | GTEEx/v8      | Adrenal Gland                     | NOC3L   | C  | 3.32979E-12 | 0.40716    | 2.32596E-10 |
| rs112252876 | 10 | 96123355 | eQTLGen       | eQTLGen cis eQTLs                 | PDLIM1  | T  | 3.4221E-12  | -6.959     | 0.0         |
| rs11187864  | 10 | 96082506 | eQTLGen       | eQTLGen cis eQTLs                 | PDLIM1  | T  | 3.6788E-12  | -6.9489    | 0.0         |
| rs11187883  | 10 | 96096866 | eQTLGen       | eQTLGen cis eQTLs                 | HELLS   | C  | 4.6392E-12  | 2.6533E+06 | 0.0         |
| rs11187844  | 10 | 96056629 | eQTLcatalogue | GEUVADIS ge LCL                   | PLCE1   | C  | 4.66285E-12 | 0.245293   | 2.33142E-08 |
| rs3740359   | 10 | 96100119 | eQTLGen       | eQTLGen cis eQTLs                 | PDLIM1  | T  | 4.9781E-12  | -6.9062    | 0.0         |
| rs11187840  | 10 | 96050351 | BIOSQTL       | BIOS eQTL geneLevel               | TBC1D12 | G  | 5.02742E-12 | 6.9048625  | 0.0         |
| rs753724    | 10 | 96051417 | BIOSQTL       | BIOS eQTL geneLevel               | TBC1D12 | T  | 5.02742E-12 | 6.9048625  | 0.0         |
| rs3740365   | 10 | 96053239 | BIOSQTL       | BIOS eQTL geneLevel               | TBC1D12 | A  | 5.02742E-12 | 6.9048625  | 0.0         |
| rs12220091  | 10 | 96053689 | BIOSQTL       | BIOS eQTL geneLevel               | TBC1D12 | T  | 5.02742E-12 | 6.9048625  | 0.0         |
| rs75017201  | 10 | 96055152 | BIOSQTL       | BIOS eQTL geneLevel               | TBC1D12 | T  | 5.02742E-12 | 6.9048625  | 0.0         |
| rs11187863  | 10 | 96081457 | eQTLGen       | eQTLGen cis eQTLs                 | HELLS   | G  | 5.4474E-12  | 2.5696E+06 | 0.0         |
| rs11187907  | 10 | 96125361 | eQTLGen       | eQTLGen cis eQTLs                 | NOC3L   | T  | 5.7302E-12  | 2.5433E+06 | 0.0         |
| rs11187840  | 10 | 96050351 | GTEEx/v8      | Cells EBV-transformed lymphocytes | PLCE1   | G  | 5.80787E-12 | 0.9539     | 1.20882E-07 |
| rs75017201  | 10 | 96055152 | GTEEx/v8      | Cells EBV-transformed lymphocytes | PLCE1   | T  | 5.80787E-12 | 0.9539     | 1.20882E-07 |
| rs11187877  | 10 | 96092121 | eQTLGen       | eQTLGen cis eQTLs                 | HELLS   | A  | 5.935E-12   | 2.5251E+06 | 0.0         |
| rs79746649  | 10 | 96120218 | eQTLGen       | eQTLGen cis eQTLs                 | PDLIM1  | T  | 5.9769E-12  | -6.8802    | 0.0         |
| rs7101207   | 10 | 96122857 | eQTLGen       | eQTLGen cis eQTLs                 | NOC3L   | A  | 6.0614E-12  | 2.5141E+06 | 0.0         |
| rs7101207   | 10 | 96122857 | eQTLGen       | eQTLGen cis eQTLs                 | PDLIM1  | A  | 6.1643E-12  | -6.8757    | 0.0         |
| rs11187906  | 10 | 96124838 | eQTLGen       | eQTLGen cis eQTLs                 | NOC3L   | A  | 6.2602E-12  | 2.4970E+06 | 0.0         |
| rs11187882  | 10 | 96095861 | eQTLGen       | eQTLGen cis eQTLs                 | HELLS   | C  | 6.3397E-12  | 2.4907E+06 | 0.0         |
| rs113544984 | 10 | 96127448 | eQTLGen       | eQTLGen cis eQTLs                 | NOC3L   | A  | 6.5108E-12  | 2.4769E+06 | 0.0         |
| rs10509672  | 10 | 96115957 | eQTLcatalogue | TwinsUK ge LCL                    | PLCE1   | G  | 6.70783E-12 | 0.133806   | 3.35392E-08 |

|                       |    |          |               |                            |           |          |             |            |             |
|-----------------------|----|----------|---------------|----------------------------|-----------|----------|-------------|------------|-------------|
| rs74825688            | 10 | 96119687 | eQTLcatalogue | TwinsUK geLCL              | PLCE1     | G        | 6.70783E-12 | 0.133806   | 3.35392E-08 |
| rs79193572            | 10 | 96119713 | eQTLcatalogue | TwinsUK geLCL              | PLCE1     | A        | 6.70783E-12 | 0.133806   | 3.35392E-08 |
| rs79746649            | 10 | 96120218 | eQTLcatalogue | TwinsUK geLCL              | PLCE1     | C        | 6.70783E-12 | 0.133806   | 3.35392E-08 |
| rs2274224             | 10 | 96039597 | GTEXv8        | Lung                       | NOC3L     | C        | 6.8562E-12  | 0.169146   | 6.99161E-23 |
| rs3891783             | 10 | 96015793 | GTEXv8        | Lung                       | NOC3L     | G        | 7.03959E-12 | 0.169026   | 6.99161E-23 |
| rs57866767            | 10 | 96023077 | GTEXv8        | Lung                       | NOC3L     | C        | 7.03959E-12 | 0.169026   | 6.99161E-23 |
| rs3781266             | 10 | 96052747 | BIOSQTL       | BIOS eQTL geneLevel        | TBC1D12   | G        | 7.04201E-12 | 6.8569227  | 0.0         |
| rs11187842            | 10 | 96052511 | BIOSQTL       | BIOS eQTL geneLevel        | TBC1D12   | T        | 7.48896E-12 | 6.8481774  | 0.0         |
| rs10786156            | 10 | 96014622 | GTEXv8        | Lung                       | NOC3L     | G        | 7.60516E-12 | 0.168552   | 6.99161E-23 |
| rs11187845            | 10 | 96060198 | GTEXv8        | Cells Cultured fibroblasts | PLCE1-AS1 | A        | 7.6979E-12  | -0.362676  | 3.86001E-30 |
| rs11187847            | 10 | 96063440 | GTEXv8        | Cells Cultured fibroblasts | PLCE1-AS1 | G        | 7.6979E-12  | -0.362676  | 3.86001E-30 |
| rs11187838            | 10 | 96038686 | GTEXv8        | Adrenal Gland              | NOC3L     | A        | 8.06874E-12 | 0.400858   | 2.32596E-10 |
| rs11187845            | 10 | 96060198 | eQTLcatalogue | BLUEPRINT ge monocyte      | NOC3L     | C        | 8.41476E-12 | 0.271954   | 4.20738E-08 |
| rs12217792            | 10 | 96062386 | eQTLcatalogue | BLUEPRINT ge monocyte      | NOC3L     | T        | 8.41476E-12 | 0.271954   | 4.20738E-08 |
| rs11187847            | 10 | 96063440 | eQTLcatalogue | BLUEPRINT ge monocyte      | NOC3L     | C        | 8.41476E-12 | 0.271954   | 4.20738E-08 |
| rs7096883             | 10 | 96069149 | eQTLcatalogue | BLUEPRINT ge monocyte      | NOC3L     | G        | 8.41476E-12 | 0.271954   | 4.20738E-08 |
| rs11187866            | 10 | 96085991 | eQTLGen       | eQTLGen cis eQTLs          | HELLS     | G        | 8.6951E-12  | 2.3260E+06 | 0.0         |
| rs3740359             | 10 | 96100119 | BIOSQTL       | BIOS eQTL geneLevel        | TBC1D12   | T        | 8.87869E-12 | 6.8237607  | 0.0         |
| rs11187856            | 10 | 96076869 | eQTLGen       | eQTLGen cis eQTLs          | HELLS     | A        | 9.335E-12   | 2.2880E+06 | 0.0         |
| 10:96112261_AAAAAAC_A | 10 | 96112261 | eQTLcatalogue | GEUVADIS ge LCL            | PLCE1     | AAAAAAAC | 1.01771E-11 | 0.313995   | 5.08855E-08 |
| rs112252876           | 10 | 96123355 | eQTLGen       | eQTLGen cis eQTLs          | NOC3L     | T        | 1.0741E-11  | 2.2146E+06 | 0.0         |
| rs11187852            | 10 | 96070132 | eQTLGen       | eQTLGen cis eQTLs          | HELLS     | A        | 1.0892E-11  | 2.2077E+06 | 0.0         |
| rs11187847            | 10 | 96063440 | BIOSQTL       | BIOS eQTL geneLevel        | TBC1D12   | G        | 1.13699E-11 | 6.7880264  | 0.0         |
| rs7096883             | 10 | 96069149 | BIOSQTL       | BIOS eQTL geneLevel        | TBC1D12   | A        | 1.13699E-11 | 6.7880264  | 0.0         |
| rs75409190            | 10 | 96072425 | eQTLGen       | eQTLGen cis eQTLs          | HELLS     | T        | 1.137E-11   | 2.1847E+06 | 0.0         |
| rs11187856            | 10 | 96076869 | eQTLcatalogue | BLUEPRINT ge monocyte      | NOC3L     | G        | 1.17547E-11 | 0.273524   | 5.87735E-08 |
| rs7100626             | 10 | 96069674 | eQTLcatalogue | BLUEPRINT ge monocyte      | NOC3L     | C        | 1.18126E-11 | 0.273463   | 5.9063E-08  |
| rs11187852            | 10 | 96070132 | eQTLcatalogue | BLUEPRINT ge monocyte      | NOC3L     | G        | 1.18329E-11 | 0.273449   | 5.91645E-08 |
| rs752140              | 10 | 96071396 | eQTLcatalogue | BLUEPRINT ge monocyte      | NOC3L     | C        | 1.18329E-11 | 0.273449   | 5.91645E-08 |
| rs75409190            | 10 | 96072425 | eQTLcatalogue | BLUEPRINT ge monocyte      | NOC3L     | C        | 1.18329E-11 | 0.273449   | 5.91645E-08 |
| rs771106747           | 10 | 96072873 | eQTLcatalogue | BLUEPRINT ge monocyte      | NOC3L     | CTA      | 1.18329E-11 | 0.273449   | 5.91645E-08 |
| rs749295068           | 10 | 96073508 | eQTLcatalogue | BLUEPRINT ge monocyte      | NOC3L     | AGAT     | 1.18329E-11 | 0.273449   | 5.91645E-08 |
| rs11187863            | 10 | 96081457 | eQTLcatalogue | BLUEPRINT ge monocyte      | NOC3L     | T        | 1.18329E-11 | 0.273449   | 5.91645E-08 |
| rs11187864            | 10 | 96082506 | eQTLcatalogue | BLUEPRINT ge monocyte      | NOC3L     | C        | 1.18329E-11 | 0.273449   | 5.91645E-08 |
| rs11187866            | 10 | 96085991 | eQTLcatalogue | BLUEPRINT ge monocyte      | NOC3L     | C        | 1.18329E-11 | 0.273449   | 5.91645E-08 |
| rs11187870            | 10 | 96087866 | eQTLcatalogue | BLUEPRINT ge monocyte      | NOC3L     | G        | 1.18329E-11 | 0.273449   | 5.91645E-08 |

|             |    |          |               |                                   |         |   |             |            |             |
|-------------|----|----------|---------------|-----------------------------------|---------|---|-------------|------------|-------------|
| rs11187877  | 10 | 96092121 | eQTLcatalogue | BLUEPRINT ge monocyte             | NOC3L   | G | 1.18329E-11 | 0.273449   | 5.91645E-08 |
| rs11187882  | 10 | 96095861 | eQTLcatalogue | BLUEPRINT ge monocyte             | NOC3L   | A | 1.18329E-11 | 0.273449   | 5.91645E-08 |
| rs34309017  | 10 | 96061619 | GTEX/v8       | Cells EBV-transformed lymphocytes | PLCE1   | A | 1.21124E-11 | 0.952596   | 1.20882E-07 |
| rs12217792  | 10 | 96062386 | GTEX/v8       | Cells EBV-transformed lymphocytes | PLCE1   | C | 1.21124E-11 | 0.952596   | 1.20882E-07 |
| rs7096883   | 10 | 96069149 | GTEX/v8       | Cells EBV-transformed lymphocytes | PLCE1   | A | 1.21124E-11 | 0.952596   | 1.20882E-07 |
| rs11187877  | 10 | 96092121 | eQTLGen       | eQTLGen cis eQTLs                 | PDLIM1  | A | 1.2458E-11  | -6.7748    | 0.0         |
| rs12217792  | 10 | 96062386 | BIOSQTL       | BIOS eQTL geneLevel               | TBC1D12 | C | 1.25097E-11 | 6.7742715  | 0.0         |
| rs7100626   | 10 | 96069674 | eQTLGen       | eQTLGen cis eQTLs                 | HELLS   | A | 1.2807E-11  | 2,1218E+06 | 0.0         |
| rs11187906  | 10 | 96124838 | eQTLcatalogue | BLUEPRINT ge monocyte             | NOC3L   | T | 1.28242E-11 | 0.291148   | 6.4121E-08  |
| rs11187907  | 10 | 96125361 | eQTLcatalogue | BLUEPRINT ge monocyte             | NOC3L   | C | 1.28242E-11 | 0.291148   | 6.4121E-08  |
| rs113544984 | 10 | 96127448 | eQTLcatalogue | BLUEPRINT ge monocyte             | NOC3L   | C | 1.28242E-11 | 0.291148   | 6.4121E-08  |
| rs7101207   | 10 | 96122857 | eQTLcatalogue | BLUEPRINT ge monocyte             | NOC3L   | G | 1.29283E-11 | 0.291223   | 6.46415E-08 |
| rs7100626   | 10 | 96069674 | GTEX/v8       | Cells EBV-transformed lymphocytes | PLCE1   | A | 1.346E-11   | 0.959887   | 1.20882E-07 |
| rs11187852  | 10 | 96070132 | GTEX/v8       | Cells EBV-transformed lymphocytes | PLCE1   | A | 1.346E-11   | 0.959887   | 1.20882E-07 |
| rs75409190  | 10 | 96072425 | GTEX/v8       | Cells EBV-transformed lymphocytes | PLCE1   | T | 1.346E-11   | 0.959887   | 1.20882E-07 |
| rs771106747 | 10 | 96072873 | GTEX/v8       | Cells EBV-transformed lymphocytes | PLCE1   | C | 1.346E-11   | 0.959887   | 1.20882E-07 |
| rs749295068 | 10 | 96073508 | GTEX/v8       | Cells EBV-transformed lymphocytes | PLCE1   | A | 1.346E-11   | 0.959887   | 1.20882E-07 |
| rs11187856  | 10 | 96076869 | GTEX/v8       | Cells EBV-transformed lymphocytes | PLCE1   | A | 1.346E-11   | 0.959887   | 1.20882E-07 |
| rs752140    | 10 | 96071396 | eQTLGen       | eQTLGen cis eQTLs                 | HELLS   | T | 1.4723E-11  | 2,0484E+06 | 0.0         |
| rs74825688  | 10 | 96119687 | GTEX/v8       | Cells EBV-transformed lymphocytes | PLCE1   | A | 1.50065E-11 | 0.937552   | 1.20882E-07 |
| rs11187845  | 10 | 96060198 | BIOSQTL       | BIOS eQTL geneLevel               | TBC1D12 | A | 1.5135E-11  | 6.7467696  | 0.0         |
| rs11187856  | 10 | 96076869 | eQTLGen       | eQTLGen cis eQTLs                 | PDLIM1  | A | 1.9462E-11  | -6.71      | 0.0         |
| rs3740359   | 10 | 96100119 | eQTLGen       | eQTLGen cis eQTLs                 | NOC3L   | T | 1.9489E-11  | 1,8990E+06 | 0.0         |
| rs7100626   | 10 | 96069674 | eQTLcatalogue | TwinsUK ge LCL                    | PLCE1   | C | 2.02485E-11 | 0.128196   | 1.01243E-07 |
| rs11187852  | 10 | 96070132 | eQTLcatalogue | TwinsUK ge LCL                    | PLCE1   | G | 2.02485E-11 | 0.128196   | 1.01243E-07 |
| rs752140    | 10 | 96071396 | eQTLcatalogue | TwinsUK ge LCL                    | PLCE1   | C | 2.02485E-11 | 0.128196   | 1.01243E-07 |
| rs75409190  | 10 | 96072425 | eQTLcatalogue | TwinsUK ge LCL                    | PLCE1   | C | 2.02485E-11 | 0.128196   | 1.01243E-07 |
| rs11187856  | 10 | 96076869 | eQTLcatalogue | TwinsUK ge LCL                    | PLCE1   | G | 2.02485E-11 | 0.128196   | 1.01243E-07 |
| rs11187863  | 10 | 96081457 | eQTLcatalogue | TwinsUK ge LCL                    | PLCE1   | T | 2.02485E-11 | 0.128196   | 1.01243E-07 |
| rs11187864  | 10 | 96082506 | eQTLcatalogue | TwinsUK ge LCL                    | PLCE1   | C | 2.02485E-11 | 0.128196   | 1.01243E-07 |
| rs11187866  | 10 | 96085991 | eQTLcatalogue | TwinsUK ge LCL                    | PLCE1   | C | 2.02485E-11 | 0.128196   | 1.01243E-07 |
| rs11187870  | 10 | 96087866 | eQTLcatalogue | TwinsUK ge LCL                    | PLCE1   | G | 2.02485E-11 | 0.128196   | 1.01243E-07 |
| rs11187877  | 10 | 96092121 | eQTLcatalogue | TwinsUK ge LCL                    | PLCE1   | G | 2.02485E-11 | 0.128196   | 1.01243E-07 |
| rs11187882  | 10 | 96095861 | eQTLcatalogue | TwinsUK ge LCL                    | PLCE1   | A | 2.02485E-11 | 0.128196   | 1.01243E-07 |
| rs11187883  | 10 | 96096866 | eQTLcatalogue | TwinsUK ge LCL                    | PLCE1   | T | 2.02485E-11 | 0.128196   | 1.01243E-07 |

|             |    |          |               |                                   |           |   |             |            |             |
|-------------|----|----------|---------------|-----------------------------------|-----------|---|-------------|------------|-------------|
| rs7101207   | 10 | 96122857 | eQTLcatalogue | TwinsUK ge LCL                    | PLCE1     | G | 2.19128E-11 | 0.133521   | 1.09564E-07 |
| rs112252876 | 10 | 96123355 | eQTLcatalogue | TwinsUK ge LCL                    | PLCE1     | C | 2.19128E-11 | 0.133521   | 1.09564E-07 |
| rs11187906  | 10 | 96124838 | eQTLcatalogue | TwinsUK ge LCL                    | PLCE1     | T | 2.19128E-11 | 0.133521   | 1.09564E-07 |
| rs11187907  | 10 | 96125361 | eQTLcatalogue | TwinsUK ge LCL                    | PLCE1     | C | 2.19128E-11 | 0.133521   | 1.09564E-07 |
| rs113544984 | 10 | 96127448 | eQTLcatalogue | TwinsUK ge LCL                    | PLCE1     | C | 2.19128E-11 | 0.133521   | 1.09564E-07 |
| rs75409190  | 10 | 96072425 | eQTLGen       | eQTLGen cis eQTLs                 | PDLIM1    | T | 2.2135E-11  | -6.6911    | 0.0         |
| rs11187890  | 10 | 96102758 | eQTLcatalogue | TwinsUK ge LCL                    | PLCE1     | T | 2.49173E-11 | 0.128949   | 1.24586E-07 |
| rs11187895  | 10 | 96106240 | eQTLcatalogue | TwinsUK ge LCL                    | PLCE1     | G | 2.49173E-11 | 0.128949   | 1.24586E-07 |
| rs11187897  | 10 | 96106603 | eQTLcatalogue | TwinsUK ge LCL                    | PLCE1     | A | 2.49173E-11 | 0.128949   | 1.24586E-07 |
| rs11187882  | 10 | 96095861 | eQTLGen       | eQTLGen cis eQTLs                 | PDLIM1    | C | 2.496E-11   | -6.6734    | 0.0         |
| rs7100626   | 10 | 96069674 | eQTLGen       | eQTLGen cis eQTLs                 | PDLIM1    | A | 2.5234E-11  | -6.6719    | 0.0         |
| rs11187863  | 10 | 96081457 | eQTLGen       | eQTLGen cis eQTLs                 | PDLIM1    | G | 3.0736E-11  | -6.6429    | 0.0         |
| rs11187907  | 10 | 96125361 | eQTLGen       | eQTLGen cis eQTLs                 | HELLS     | T | 3.4491E-11  | 1,5930E+06 | 0.0         |
| rs113544984 | 10 | 96127448 | GTEX/v8       | Cells EBV-transformed lymphocytes | PLCE1     | A | 3.47759E-11 | 0.940054   | 1.20882E-07 |
| rs11187883  | 10 | 96096866 | eQTLGen       | eQTLGen cis eQTLs                 | PDLIM1    | C | 3.7055E-11  | -6.6153    | 0.0         |
| rs7101207   | 10 | 96122857 | eQTLGen       | eQTLGen cis eQTLs                 | HELLS     | A | 4.0021E-11  | 1,5126E+06 | 0.0         |
| rs7080472   | 10 | 96012950 | GTEX/v8       | Lung                              | NOC3L     | T | 4.03452E-11 | 0.165385   | 6.99161E-23 |
| rs11187852  | 10 | 96070132 | eQTLGen       | eQTLGen cis eQTLs                 | PDLIM1    | A | 4.3687E-11  | -6.5909    | 0.0         |
| rs2077218   | 10 | 96071561 | eQTLGen       | eQTLGen cis eQTLs                 | NOC3L     | G | 5.1754E-11  | -6.5657    | 0.0         |
| rs74825688  | 10 | 96119687 | eQTLGen       | eQTLGen cis eQTLs                 | HELLS     | A | 5.352E-11   | 1,3548E+06 | 0.0         |
| rs7101207   | 10 | 96122857 | GTEX/v8       | Cells EBV-transformed lymphocytes | PLCE1     | A | 5.68167E-11 | 0.931326   | 1.20882E-07 |
| rs112252876 | 10 | 96123355 | GTEX/v8       | Cells EBV-transformed lymphocytes | PLCE1     | T | 5.68167E-11 | 0.931326   | 1.20882E-07 |
| rs11187838  | 10 | 96038686 | GTEX/v8       | Lung                              | NOC3L     | A | 5.94459E-11 | 0.161642   | 6.99161E-23 |
| rs752140    | 10 | 96071396 | eQTLGen       | eQTLGen cis eQTLs                 | PDLIM1    | T | 5.9975E-11  | -6.5437    | 0.0         |
| rs112252876 | 10 | 96123355 | eQTLGen       | eQTLGen cis eQTLs                 | HELLS     | T | 6.0216E-11  | 1,2909E+06 | 0.0         |
| rs11187906  | 10 | 96124838 | BIOSQTL       | BIOS eQTL geneLevel               | TBC1D12   | A | 6.20974E-11 | 6.5386326  | 0.0         |
| rs11187906  | 10 | 96124838 | eQTLGen       | eQTLGen cis eQTLs                 | HELLS     | A | 6.7279E-11  | 1,2299E+06 | 0.0         |
| rs10509672  | 10 | 96115957 | eQTLGen       | eQTLGen cis eQTLs                 | HELLS     | C | 6.8274E-11  | 1,2219E+06 | 0.0         |
| rs753724    | 10 | 96051417 | GTEX/v8       | Cells Cultured fibroblasts        | PLCE1-AS1 | T | 6.9572E-11  | -0.339785  | 3.86001E-30 |
| rs11187842  | 10 | 96052511 | GTEX/v8       | Cells Cultured fibroblasts        | PLCE1-AS1 | T | 6.9572E-11  | -0.339785  | 3.86001E-30 |
| rs3781266   | 10 | 96052747 | GTEX/v8       | Cells Cultured fibroblasts        | PLCE1-AS1 | G | 6.9572E-11  | -0.339785  | 3.86001E-30 |
| rs3740365   | 10 | 96053239 | GTEX/v8       | Cells Cultured fibroblasts        | PLCE1-AS1 | A | 6.9572E-11  | -0.339785  | 3.86001E-30 |
| rs12220091  | 10 | 96053689 | GTEX/v8       | Cells Cultured fibroblasts        | PLCE1-AS1 | T | 6.9572E-11  | -0.339785  | 3.86001E-30 |
| rs11187866  | 10 | 96085991 | eQTLGen       | eQTLGen cis eQTLs                 | PDLIM1    | G | 7.5051E-11  | -6.5102    | 0.0         |
| rs3740359   | 10 | 96100119 | eQTLcatalogue | GEUVADIS ge LCL                   | PLCE1     | C | 7.60307E-11 | 0.257729   | 3.80154E-07 |
| rs79746649  | 10 | 96120218 | eQTLGen       | eQTLGen cis eQTLs                 | HELLS     | T | 7.9576E-11  | 1,1379E+06 | 0.0         |
| rs11187895  | 10 | 96106240 | eQTLGen       | eQTLGen cis eQTLs                 | HELLS     | C | 8.2265E-11  | 1,1193E+06 | 0.0         |
| rs79193572  | 10 | 96119713 | eQTLGen       | eQTLGen cis eQTLs                 | HELLS     | G | 8.493E-11   | 1,1021E+06 | 0.0         |
| rs11187897  | 10 | 96106603 | eQTLGen       | eQTLGen cis eQTLs                 | HELLS     | G | 8.5609E-11  | 1,0973E+06 | 0.0         |



|             |    |          |               |                                   |           |    |             |            |             |
|-------------|----|----------|---------------|-----------------------------------|-----------|----|-------------|------------|-------------|
| rs753724    | 10 | 96051417 | GTEEx/v8      | Cells EBV-transformed lymphocytes | PLCE1     | T  | 9.1525E-11  | 0.86599    | 1.20882E-07 |
| rs11187842  | 10 | 96052511 | GTEEx/v8      | Cells EBV-transformed lymphocytes | PLCE1     | T  | 9.1525E-11  | 0.86599    | 1.20882E-07 |
| rs3781266   | 10 | 96052747 | GTEEx/v8      | Cells EBV-transformed lymphocytes | PLCE1     | G  | 9.1525E-11  | 0.86599    | 1.20882E-07 |
| rs3740365   | 10 | 96053239 | GTEEx/v8      | Cells EBV-transformed lymphocytes | PLCE1     | A  | 9.1525E-11  | 0.86599    | 1.20882E-07 |
| rs12220091  | 10 | 96053689 | GTEEx/v8      | Cells EBV-transformed lymphocytes | PLCE1     | T  | 9.1525E-11  | 0.86599    | 1.20882E-07 |
| rs11187890  | 10 | 96102758 | eQTLGen       | eQTLGen cis eQTLs                 | HELLS     | C  | 9.4938E-11  | 1,0407E+06 | 0.0         |
| rs3740359   | 10 | 96100119 | eQTLcatalogue | TwinsUK ge LCL                    | PLCE1     | C  | 1.0089E-10  | 0.121466   | 5.0445E-07  |
| rs11187907  | 10 | 96125361 | eQTLcatalogue | GEUVADIS ge LCL                   | PLCE1     | C  | 1.20612E-10 | 0.293466   | 6.0306E-07  |
| rs11187907  | 10 | 96125361 | GTEEx/v8      | Cells EBV-transformed lymphocytes | PLCE1     | T  | 1.25898E-10 | 0.900331   | 1.20882E-07 |
| rs3740359   | 10 | 96100119 | eQTLGen       | eQTLGen cis eQTLs                 | HELLS     | T  | 1.3681E-10  | 8,3839E+05 | 0.0         |
| rs79746649  | 10 | 96120218 | eQTLGen       | eQTLGen cis eQTLs                 | NOC3L     | T  | 1.425E-10   | 8,1611E+05 | 0.0         |
| rs12220091  | 10 | 96053689 | eQTLcatalogue | BLUEPRINT ge monocyte             | NOC3L     | C  | 1.65134E-10 | 0.240279   | 8.2567E-07  |
| rs769015184 | 10 | 96049708 | eQTLcatalogue | BLUEPRINT ge monocyte             | NOC3L     | AC | 1.65229E-10 | 0.240282   | 8.26145E-07 |
| rs753724    | 10 | 96051417 | eQTLcatalogue | BLUEPRINT ge monocyte             | NOC3L     | G  | 1.65229E-10 | 0.240282   | 8.26145E-07 |
| rs11187842  | 10 | 96052511 | eQTLcatalogue | BLUEPRINT ge monocyte             | NOC3L     | C  | 1.65229E-10 | 0.240282   | 8.26145E-07 |
| rs3781266   | 10 | 96052747 | eQTLcatalogue | BLUEPRINT ge monocyte             | NOC3L     | A  | 1.65229E-10 | 0.240282   | 8.26145E-07 |
| rs3740365   | 10 | 96053239 | eQTLcatalogue | BLUEPRINT ge monocyte             | NOC3L     | T  | 1.65229E-10 | 0.240282   | 8.26145E-07 |
| rs75017201  | 10 | 96055152 | eQTLcatalogue | BLUEPRINT ge monocyte             | NOC3L     | C  | 1.65229E-10 | 0.240282   | 8.26145E-07 |
| rs11187845  | 10 | 96060198 | GTEEx/v8      | Cells EBV-transformed lymphocytes | PLCE1     | A  | 1.82938E-10 | 0.86298    | 1.20882E-07 |
| rs11187847  | 10 | 96063440 | GTEEx/v8      | Cells EBV-transformed lymphocytes | PLCE1     | G  | 1.82938E-10 | 0.86298    | 1.20882E-07 |
| rs74825688  | 10 | 96119687 | eQTLGen       | eQTLGen cis eQTLs                 | NOC3L     | A  | 1.8829E-10  | 6,5978E+05 | 0.0         |
| rs7080472   | 10 | 96012950 | GTEEx/v8      | Skin Sun Exposed Lower leg        | NOC3L     | T  | 2.07651E-10 | 0.149208   | 4.18218E-20 |
| rs113544984 | 10 | 96127448 | eQTLGen       | eQTLGen cis eQTLs                 | HELLS     | A  | 2.0897E-10  | 6,0207E+05 | 0.0         |
| rs10509672  | 10 | 96115957 | eQTLGen       | eQTLGen cis eQTLs                 | NOC3L     | C  | 2.1531E-10  | 5,8491E+05 | 0.0         |
| rs11187864  | 10 | 96082506 | eQTLGen       | eQTLGen cis eQTLs                 | HELLS     | T  | 2.8671E-10  | 6.306      | 0.0         |
| rs79193572  | 10 | 96119713 | eQTLGen       | eQTLGen cis eQTLs                 | NOC3L     | G  | 2.8782E-10  | 4,2128E+05 | 0.0         |
| rs3740360   | 10 | 96025491 | BIOSQTL       | BIOS eQTL geneLevel               | TBC1D12   | C  | 3.29122E-10 | 6.2844446  | 0.0         |
| rs752140    | 10 | 96071396 | GTEEx/v8      | Cells Cultured fibroblasts        | PLCE1-AS1 | T  | 3.39376E-10 | -0.338477  | 3.86001E-30 |
| rs11187837  | 10 | 96035980 | BIOSQTL       | BIOS eQTL geneLevel               | TBC1D12   | C  | 4.05749E-10 | 6.2518755  | 0.0         |
| rs11187895  | 10 | 96106240 | eQTLGen       | eQTLGen cis eQTLs                 | NOC3L     | C  | 4.1574E-10  | 2,1236E+05 | 0.0         |
| rs2274224   | 10 | 96039597 | eQTLcatalogue | BLUEPRINT ge monocyte             | NOC3L     | G  | 4.18698E-10 | 0.135701   | 2.09349E-06 |
| rs3891783   | 10 | 96015793 | eQTLcatalogue | BLUEPRINT ge monocyte             | NOC3L     | C  | 4.20614E-10 | 0.135685   | 2.10307E-06 |
| rs10786156  | 10 | 96014622 | eQTLcatalogue | BLUEPRINT ge monocyte             | NOC3L     | C  | 4.21663E-10 | 0.135662   | 2.10832E-06 |

|             |    |          |               |                                   |           |   |             |           |             |
|-------------|----|----------|---------------|-----------------------------------|-----------|---|-------------|-----------|-------------|
| rs11187838  | 10 | 96038686 | eQTLcatalogue | BLUEPRINT ge monocyte             | NOC3L     | G | 4.23274E-10 | 0.135644  | 2.11637E-06 |
| rs17109875  | 10 | 96026575 | BIOSQTL       | BIOS eQTL geneLevel               | TBC1D12   | C | 5.44194E-10 | 6.2059539 | 0.0         |
| rs11187863  | 10 | 96081457 | GTEX/v8       | Cells Cultured fibroblasts        | PLCE1-AS1 | G | 5.69704E-10 | -0.333231 | 3.86001E-30 |
| rs11187866  | 10 | 96085991 | GTEX/v8       | Cells Cultured fibroblasts        | PLCE1-AS1 | G | 5.69704E-10 | -0.333231 | 3.86001E-30 |
| rs11187883  | 10 | 96096866 | GTEX/v8       | Cells Cultured fibroblasts        | PLCE1-AS1 | C | 5.69704E-10 | -0.333231 | 3.86001E-30 |
| rs34309017  | 10 | 96061619 | GTEX/v8       | Cells Cultured fibroblasts        | PLCE1-AS1 | A | 6.42319E-10 | -0.337731 | 3.86001E-30 |
| rs12217792  | 10 | 96062386 | GTEX/v8       | Cells Cultured fibroblasts        | PLCE1-AS1 | C | 6.42319E-10 | -0.337731 | 3.86001E-30 |
| rs11187890  | 10 | 96102758 | eQTLGen       | eQTLGen cis eQTLs                 | NOC3L     | C | 7.6705E-10  | 6.1517    | 1.316E-05   |
| rs75409190  | 10 | 96072425 | GTEX/v8       | Cells Cultured fibroblasts        | PLCE1-AS1 | T | 8.07901E-10 | -0.344158 | 3.86001E-30 |
| rs771106747 | 10 | 96072873 | GTEX/v8       | Cells Cultured fibroblasts        | PLCE1-AS1 | C | 8.07901E-10 | -0.344158 | 3.86001E-30 |
| rs749295068 | 10 | 96073508 | GTEX/v8       | Cells Cultured fibroblasts        | PLCE1-AS1 | A | 8.07901E-10 | -0.344158 | 3.86001E-30 |
| rs11187856  | 10 | 96076869 | GTEX/v8       | Cells Cultured fibroblasts        | PLCE1-AS1 | A | 8.07901E-10 | -0.344158 | 3.86001E-30 |
| rs11187863  | 10 | 96081457 | GTEX/v8       | Cells EBV-transformed lymphocytes | PLCE1     | G | 1.09697E-09 | 0.828697  | 1.20882E-07 |
| rs11187866  | 10 | 96085991 | GTEX/v8       | Cells EBV-transformed lymphocytes | PLCE1     | G | 1.09697E-09 | 0.828697  | 1.20882E-07 |
| rs11187883  | 10 | 96096866 | GTEX/v8       | Cells EBV-transformed lymphocytes | PLCE1     | C | 1.09697E-09 | 0.828697  | 1.20882E-07 |
| rs7096883   | 10 | 96069149 | GTEX/v8       | Cells Cultured fibroblasts        | PLCE1-AS1 | A | 1.15214E-09 | -0.331235 | 3.86001E-30 |
| rs7096883   | 10 | 96069149 | eQTLcatalogue | TwinsUK ge LCL                    | PLCE1     | G | 1.16776E-09 | 0.112521  | 5.8388E-06  |
| rs7080472   | 10 | 96012950 | eQTLcatalogue | BLUEPRINT ge monocyte             | NOC3L     | G | 1.24509E-09 | 0.131762  | 6.22545E-06 |
| rs11187870  | 10 | 96087866 | GTEX/v8       | Cells Cultured fibroblasts        | PLCE1-AS1 | C | 1.34499E-09 | -0.342164 | 3.86001E-30 |
| rs11187897  | 10 | 96106603 | eQTLGen       | eQTLGen cis eQTLs                 | NOC3L     | G | 1.3646E-09  | 6.0596    | 1.3094E-05  |
| rs3891783   | 10 | 96015793 | GTEX/v8       | Skin Sun Exposed Lower leg        | NOC3L     | G | 1.41912E-09 | 0.141003  | 4.18218E-20 |
| rs57866767  | 10 | 96023077 | GTEX/v8       | Skin Sun Exposed Lower leg        | NOC3L     | C | 1.41912E-09 | 0.141003  | 4.18218E-20 |
| rs7100626   | 10 | 96069674 | GTEX/v8       | Cells Cultured fibroblasts        | PLCE1-AS1 | A | 1.47359E-09 | -0.337229 | 3.86001E-30 |
| rs11187852  | 10 | 96070132 | GTEX/v8       | Cells Cultured fibroblasts        | PLCE1-AS1 | A | 1.47359E-09 | -0.337229 | 3.86001E-30 |
| rs11187882  | 10 | 96095861 | GTEX/v8       | Cells Cultured fibroblasts        | PLCE1-AS1 | C | 1.4751E-09  | -0.337177 | 3.86001E-30 |
| rs74825688  | 10 | 96119687 | GTEX/v8       | Cells Cultured fibroblasts        | PLCE1-AS1 | A | 1.4816E-09  | -0.33994  | 3.86001E-30 |
| rs10786156  | 10 | 96014622 | GTEX/v8       | Nerve Tibial                      | NOC3L     | G | 1.48976E-09 | 0.168244  | 1.32457E-19 |
| rs752140    | 10 | 96071396 | eQTLGen       | eQTLGen cis eQTLs                 | NOC3L     | T | 1.5184E-09  | 6.0425    | 1.3080E-05  |
| rs79193572  | 10 | 96119713 | GTEX/v8       | Cells Cultured fibroblasts        | PLCE1-AS1 | G | 1.55958E-09 | -0.341493 | 3.86001E-30 |
| rs10786156  | 10 | 96014622 | GTEX/v8       | Skin Sun Exposed Lower leg        | NOC3L     | G | 1.65539E-09 | 0.140345  | 4.18218E-20 |
| rs2274224   | 10 | 96039597 | GTEX/v8       | Nerve Tibial                      | NOC3L     | C | 1.95095E-09 | 0.166488  | 1.32457E-19 |
| rs12217792  | 10 | 96062386 | eQTLcatalogue | TwinsUK ge LCL                    | PLCE1     | T | 2.09527E-09 | 0.108906  | 1.04764E-05 |

|             |    |          |               |                                   |           |    |             |            |             |
|-------------|----|----------|---------------|-----------------------------------|-----------|----|-------------|------------|-------------|
| rs11187847  | 10 | 96063440 | eQTLcatalogue | TwinsUK geLCL                     | PLCE1     | C  | 2.09527E-09 | 0.108906   | 1.04764E-05 |
| rs3891783   | 10 | 96015793 | GTEX/v8       | Nerve Tibial                      | NOC3L     | G  | 2.42323E-09 | 0.166243   | 1.32457E-19 |
| rs57866767  | 10 | 96023077 | GTEX/v8       | Nerve Tibial                      | NOC3L     | C  | 2.42323E-09 | 0.166243   | 1.32457E-19 |
| rs7100626   | 10 | 96069674 | eQTLGen       | eQTLGen cis eQTLs                 | NOC3L     | A  | 2.5503E-09  | 2.8063E+06 | 2.603E-05   |
| rs11187852  | 10 | 96070132 | eQTLGen       | eQTLGen cis eQTLs                 | NOC3L     | A  | 2.6071E-09  | 2.7931E+06 | 2.602E-05   |
| rs11187864  | 10 | 96082506 | GTEX/v8       | Cells Cultured fibroblasts        | PLCE1-AS1 | T  | 2.65113E-09 | -0.330345  | 3.86001E-30 |
| rs11187877  | 10 | 96092121 | GTEX/v8       | Cells Cultured fibroblasts        | PLCE1-AS1 | A  | 2.65113E-09 | -0.330345  | 3.86001E-30 |
| rs145707916 | 10 | 96092992 | GTEX/v8       | Cells Cultured fibroblasts        | PLCE1-AS1 | GA | 2.65113E-09 | -0.330345  | 3.86001E-30 |
| rs750148755 | 10 | 96095271 | GTEX/v8       | Cells Cultured fibroblasts        | PLCE1-AS1 | C  | 2.65113E-09 | -0.330345  | 3.86001E-30 |
| rs778275808 | 10 | 96114212 | GTEX/v8       | Cells Cultured fibroblasts        | PLCE1-AS1 | T  | 2.75585E-09 | -0.334894  | 3.86001E-30 |
| rs10509672  | 10 | 96115957 | GTEX/v8       | Cells Cultured fibroblasts        | PLCE1-AS1 | C  | 2.75585E-09 | -0.334894  | 3.86001E-30 |
| rs79746649  | 10 | 96120218 | GTEX/v8       | Cells Cultured fibroblasts        | PLCE1-AS1 | T  | 2.75585E-09 | -0.334894  | 3.86001E-30 |
| rs2274224   | 10 | 96039597 | GTEX/v8       | Skin Sun Exposed Lower leg        | NOC3L     | C  | 2.84729E-09 | 0.13795    | 4.18218E-20 |
| rs11187890  | 10 | 96102758 | GTEX/v8       | Cells Cultured fibroblasts        | PLCE1-AS1 | C  | 2.86262E-09 | -0.331106  | 3.86001E-30 |
| rs11187895  | 10 | 96106240 | GTEX/v8       | Cells Cultured fibroblasts        | PLCE1-AS1 | C  | 2.86262E-09 | -0.331106  | 3.86001E-30 |
| rs11187897  | 10 | 96106603 | GTEX/v8       | Cells Cultured fibroblasts        | PLCE1-AS1 | G  | 2.86262E-09 | -0.331106  | 3.86001E-30 |
| rs11187863  | 10 | 96081457 | eQTLGen       | eQTLGen cis eQTLs                 | NOC3L     | G  | 2.8642E-09  | 2.7373E+06 | 2.6E-05     |
| rs11187866  | 10 | 96085991 | eQTLGen       | eQTLGen cis eQTLs                 | NOC3L     | G  | 2.8993E-09  | 2.7292E+06 | 2.6E-05     |
| rs7101207   | 10 | 96122857 | GTEX/v8       | Cells Cultured fibroblasts        | PLCE1-AS1 | A  | 3.28002E-09 | -0.335045  | 3.86001E-30 |
| rs112252876 | 10 | 96123355 | GTEX/v8       | Cells Cultured fibroblasts        | PLCE1-AS1 | T  | 3.28002E-09 | -0.335045  | 3.86001E-30 |
| rs113544984 | 10 | 96127448 | eQTLcatalogue | GENCORD ge LCL                    | PLCE1     | C  | 3.28253E-09 | 0.293762   | 1.64127E-05 |
| rs11187826  | 10 | 95988042 | BIOSQTL       | BIOS eQTL geneLevel               | TBC1D12   | G  | 3.39212E-09 | 5.9115847  | 6.013E-06   |
| rs752140    | 10 | 96071396 | GTEX/v8       | Cells EBV-transformed lymphocytes | PLCE1     | T  | 3.75953E-09 | 0.803891   | 1.20882E-07 |
| rs112252876 | 10 | 96123355 | eQTLcatalogue | GENCORD ge LCL                    | PLCE1     | C  | 3.84298E-09 | 0.287768   | 1.92149E-05 |
| rs7101207   | 10 | 96122857 | eQTLcatalogue | GENCORD ge LCL                    | PLCE1     | G  | 3.89754E-09 | 0.28761    | 1.94877E-05 |
| rs11187907  | 10 | 96125361 | eQTLcatalogue | GENCORD ge LCL                    | PLCE1     | C  | 4.00496E-09 | 0.287654   | 2.00248E-05 |
| rs11187906  | 10 | 96124838 | eQTLcatalogue | GENCORD ge LCL                    | PLCE1     | T  | 4.02821E-09 | 0.287628   | 2.0141E-05  |
| rs11187883  | 10 | 96096866 | eQTLGen       | eQTLGen cis eQTLs                 | NOC3L     | C  | 4.379E-09   | 2.4812E+06 | 3.237E-05   |
| rs11187840  | 10 | 96050351 | GTEX/v8       | Cells Cultured fibroblasts        | PLCE1-AS1 | G  | 4.40204E-09 | -0.315138  | 3.86001E-30 |
| rs75017201  | 10 | 96055152 | GTEX/v8       | Cells Cultured fibroblasts        | PLCE1-AS1 | T  | 4.40204E-09 | -0.315138  | 3.86001E-30 |
| rs113544984 | 10 | 96127448 | GTEX/v8       | Cells Cultured fibroblasts        | PLCE1-AS1 | A  | 4.55401E-09 | -0.335199  | 3.86001E-30 |
| rs11187838  | 10 | 96038686 | GTEX/v8       | Skin Sun Exposed Lower leg        | NOC3L     | A  | 4.67744E-09 | 0.136601   | 4.18218E-20 |
| rs75409190  | 10 | 96072425 | eQTLGen       | eQTLGen cis eQTLs                 | NOC3L     | T  | 5.0293E-09  | 2.3976E+06 | 3.233E-05   |
| rs11187844  | 10 | 96056629 | eQTLGen       | eQTLGen cis eQTLs                 | TBC1D12   | A  | 5.8637E-09  | 2.3041E+06 | 4.520E-05   |
| rs11187856  | 10 | 96076869 | eQTLGen       | eQTLGen cis eQTLs                 | NOC3L     | A  | 6.4366E-09  | 2.2467E+06 | 4.517E-05   |

|             |    |          |                   |                                          |        |      |             |            |                    |
|-------------|----|----------|-------------------|------------------------------------------|--------|------|-------------|------------|--------------------|
| rs11187877  | 10 | 96092121 | eQTLGen           | eQTLGen<br>cis eQTLs                     | NOC3L  | A    | 7.0975E-09  | 2,1872E+06 | 4.514E-05          |
| rs7096883   | 10 | 96069149 | eQTLGen           | eQTLGen<br>cis eQTLs                     | NOC3L  | A    | 8.6744E-09  | 2,0634E+06 | 5.795E-05          |
| rs3740360   | 10 | 96025491 | GTEX/v8           | Cells EBV-<br>transformed<br>lymphocytes | PLCE1  | C    | 9.05253E-09 | 0.798488   | 1.20882E-07        |
| rs17109875  | 10 | 96026575 | GTEX/v8           | Cells EBV-<br>transformed<br>lymphocytes | PLCE1  | C    | 9.05253E-09 | 0.798488   | 1.20882E-07        |
| rs11187837  | 10 | 96035980 | GTEX/v8           | Cells EBV-<br>transformed<br>lymphocytes | PLCE1  | C    | 9.05253E-09 | 0.798488   | 1.20882E-07        |
| rs11187847  | 10 | 96063440 | eQTLGen           | eQTLGen<br>cis eQTLs                     | NOC3L  | G    | 9.8903E-09  | 1,9823E+06 | 5.787E-05          |
| rs12217792  | 10 | 96062386 | eQTLGen           | eQTLGen<br>cis eQTLs                     | NOC3L  | C    | 1.0186E-08  | 1,9644E+06 | 5.786E-05          |
| rs11187844  | 10 | 96056629 | eQTLcatal<br>ogue | GENCORD<br>ge LCL                        | PLCE1  | C    | 1.04815E-08 | 0.235889   | 5.24075E-05        |
| rs11187882  | 10 | 96095861 | eQTLGen           | eQTLGen<br>cis eQTLs                     | NOC3L  | C    | 1.0753E-08  | 1,9308E+06 | 5.782E-05          |
| rs11187870  | 10 | 96087866 | eQTLGen           | eQTLGen<br>cis eQTLs                     | NOC3L  | C    | 1.1675E-08  | 1,8789E+06 | 6.421E-05          |
| rs12217792  | 10 | 96062386 | eQTLGen           | eQTLGen<br>cis eQTLs                     | HELLS  | C    | 1.1758E-08  | 1,8749E+06 | 6.420E-05          |
| rs7096883   | 10 | 96069149 | eQTLGen           | eQTLGen<br>cis eQTLs                     | HELLS  | A    | 1.1953E-08  | 1,8651E+06 | 6.418E-05          |
| rs3740359   | 10 | 96100119 | eQTLcatal<br>ogue | GENCORD<br>ge LCL                        | PLCE1  | C    | 1.21116E-08 | 0.272238   | 6.0558E-05         |
| rs7080472   | 10 | 96012950 | GTEX/v8           | Nerve Tibial                             | NOC3L  | T    | 1.27639E-08 | 0.159332   | 1.32457E-19        |
| rs11187842  | 10 | 96052511 | eQTLcatal<br>ogue | GENCORD<br>ge LCL                        | PLCE1  | C    | 1.39637E-08 | 0.264935   | 6.98185E-05        |
| rs3781266   | 10 | 96052747 | eQTLcatal<br>ogue | GENCORD<br>ge LCL                        | PLCE1  | A    | 1.40013E-08 | 0.264926   | 7.00065E-05        |
| rs3740365   | 10 | 96053239 | eQTLcatal<br>ogue | GENCORD<br>ge LCL                        | PLCE1  | T    | 1.41153E-08 | 0.2649     | 7.05765E-05        |
| rs12220091  | 10 | 96053689 | eQTLcatal<br>ogue | GENCORD<br>ge LCL                        | PLCE1  | C    | 1.41728E-08 | 0.264887   | 7.0864E-05         |
| rs75017201  | 10 | 96055152 | eQTLcatal<br>ogue | GENCORD<br>ge LCL                        | PLCE1  | C    | 1.45863E-08 | 0.264791   | 7.29315E-05        |
| rs11187838  | 10 | 96038686 | GTEX/v8           | Nerve Tibial                             | NOC3L  | A    | 1.48555E-08 | 0.158012   | 1.32457E-19        |
| rs11187845  | 10 | 96060198 | eQTLGen           | eQTLGen<br>cis eQTLs                     | NOC3L  | A    | 1.512E-08   | 1,7182E+06 | 7.684E-05          |
| rs3740365   | 10 | 96053239 | eQTLGen           | eQTLGen<br>cis eQTLs                     | HELLS  | A    | 1.6441E-08  | 1,6653E+06 | 8.958E-05          |
| rs753724    | 10 | 96051417 | eQTLcatal<br>ogue | GENCORD<br>ge LCL                        | PLCE1  | G    | 1.69177E-08 | 0.264207   | 8.45885E-05        |
| rs11187840  | 10 | 96050351 | eQTLGen           | eQTLGen<br>cis eQTLs                     | HELLS  | G    | 1.7486E-08  | 1,6269E+06 | 9.593E-05          |
| rs753724    | 10 | 96051417 | eQTLGen           | eQTLGen<br>cis eQTLs                     | HELLS  | T    | 1.7567E-08  | 1,6240E+06 | 9.591E-05          |
| rs75017201  | 10 | 96055152 | eQTLGen           | eQTLGen<br>cis eQTLs                     | HELLS  | T    | 1.977E-08   | 1,5491E+06 | 1.085E-4           |
| rs752140    | 10 | 96071396 | PsychEN<br>CODE   | PsychENCO<br>DE eQTLs                    | NOC3L  | T    | 1.9801E-08  | 0.0969569  | 3.523E-06          |
| rs752140    | 10 | 96071396 | eQTLcatal<br>ogue | GENCORD<br>ge LCL                        | PLCE1  | C    | 1.98151E-08 | 0.269571   | 9.90755E-05        |
| rs11187847  | 10 | 96063440 | eQTLGen           | eQTLGen<br>cis eQTLs                     | HELLS  | G    | 2.0093E-08  | 1,5389E+06 | 1.085E-4           |
| rs11187856  | 10 | 96076869 | eQTLcatal<br>ogue | GENCORD<br>ge LCL                        | PLCE1  | G    | 2.01876E-08 | 0.269417   | 0.000100938        |
| rs11187845  | 10 | 96060198 | eQTLcatal<br>ogue | TwinsUK ge<br>LCL                        | PLCE1  | C    | 2.02127E-08 | 0.0997346  | 0.000101063        |
| rs749295068 | 10 | 96073508 | eQTLcatal<br>ogue | GENCORD<br>ge LCL                        | PLCE1  | AGAT | 2.02287E-08 | 0.269401   | 0.000101144        |
| rs11187863  | 10 | 96081457 | eQTLcatal<br>ogue | GENCORD<br>ge LCL                        | PLCE1  | T    | 2.02492E-08 | 0.269347   | 0.000101246        |
| rs11187864  | 10 | 96082506 | eQTLcatal<br>ogue | GENCORD<br>ge LCL                        | PLCE1  | C    | 2.02492E-08 | 0.269347   | 0.000101246        |
| rs11187866  | 10 | 96085991 | eQTLcatal<br>ogue | GENCORD<br>ge LCL                        | PLCE1  | C    | 2.02492E-08 | 0.269347   | 0.000101246        |
| rs11187870  | 10 | 96087866 | eQTLcatal<br>ogue | GENCORD<br>ge LCL                        | PLCE1  | G    | 2.02492E-08 | 0.269347   | 0.000101246        |
| rs11187877  | 10 | 96092121 | eQTLcatal<br>ogue | GENCORD<br>ge LCL                        | PLCE1  | G    | 2.02492E-08 | 0.269347   | 0.000101246        |
| rs145707916 | 10 | 96092992 | eQTLcatal<br>ogue | GENCORD<br>ge LCL                        | PLCE1  | G    | 2.02492E-08 | 0.269347   | 0.000101246        |
| rs12217792  | 10 | 96062386 | eQTLGen           | eQTLGen<br>cis eQTLs                     | PDLIM1 | C    | 2.0256E-08  | -5.6096    | 0.0001085152559683 |
| rs75409190  | 10 | 96072425 | eQTLcatal<br>ogue | GENCORD<br>ge LCL                        | PLCE1  | C    | 2.02982E-08 | 0.269356   | 0.000101491        |
| rs7100626   | 10 | 96069674 | eQTLcatal<br>ogue | GENCORD<br>ge LCL                        | PLCE1  | C    | 2.03023E-08 | 0.269338   | 0.000101511        |
| rs11187852  | 10 | 96070132 | eQTLcatal<br>ogue | GENCORD<br>ge LCL                        | PLCE1  | G    | 2.03023E-08 | 0.269338   | 0.000101511        |

|                       |    |          |               |                                 |           |          |             |            |                    |
|-----------------------|----|----------|---------------|---------------------------------|-----------|----------|-------------|------------|--------------------|
| rs771106747           | 10 | 96072873 | eQTLcatalogue | GENCORDge LCL                   | PLCE1     | CTA      | 2.03044E-08 | 0.269369   | 0.000101522        |
| rs750148755           | 10 | 96095271 | eQTLcatalogue | GENCORDge LCL                   | PLCE1     | CATTTT   | 2.04426E-08 | 0.269275   | 0.000102213        |
| rs79746649            | 10 | 96120218 | eQTLcatalogue | GENCORDge LCL                   | PLCE1     | C        | 2.04781E-08 | 0.268979   | 0.00010239         |
| rs11187842            | 10 | 96052511 | eQTLGen       | eQTLGen cis eQTLs               | HELLS     | T        | 2.0539E-08  | 1,5246E+06 | 0.0001085014041358 |
| rs11187882            | 10 | 96095861 | eQTLcatalogue | GENCORDge LCL                   | PLCE1     | A        | 2.05663E-08 | 0.269242   | 0.000102831        |
| rs11187890            | 10 | 96102758 | eQTLcatalogue | GENCORDge LCL                   | PLCE1     | T        | 2.06772E-08 | 0.269218   | 0.000103386        |
| rs11187895            | 10 | 96106240 | eQTLcatalogue | GENCORDge LCL                   | PLCE1     | G        | 2.12925E-08 | 0.268952   | 0.000106463        |
| rs11187883            | 10 | 96096866 | eQTLcatalogue | GENCORDge LCL                   | PLCE1     | T        | 2.12993E-08 | 0.268805   | 0.000106496        |
| rs11187897            | 10 | 96106603 | eQTLcatalogue | GENCORDge LCL                   | PLCE1     | A        | 2.13815E-08 | 0.268908   | 0.000106907        |
| rs10509672            | 10 | 96115957 | eQTLcatalogue | GENCORDge LCL                   | PLCE1     | G        | 2.16348E-08 | 0.268776   | 0.000108174        |
| rs778275808           | 10 | 96114212 | eQTLcatalogue | GENCORDge LCL                   | PLCE1     | TCTC     | 2.17765E-08 | 0.268773   | 0.000108882        |
| rs11187840            | 10 | 96050351 | eQTLcatalogue | GENCORDge LCL                   | PLCE1     | A        | 2.20621E-08 | 0.262863   | 0.000110311        |
| rs79193572            | 10 | 96119713 | eQTLcatalogue | GENCORDge LCL                   | PLCE1     | A        | 2.21705E-08 | 0.268385   | 0.000110852        |
| rs7096883             | 10 | 96069149 | eQTLGen       | eQTLGen cis eQTLs               | PDLIM1    | A        | 2.3343E-08  | -5.5851    | 0.0001147666411629 |
| rs769015184           | 10 | 96049708 | eQTLcatalogue | GENCORDge LCL                   | PLCE1     | AC       | 2.47513E-08 | 0.262186   | 0.000123756        |
| rs74825688            | 10 | 96119687 | eQTLcatalogue | GENCORDge LCL                   | PLCE1     | G        | 2.62812E-08 | 0.26629    | 0.000131406        |
| rs3781266             | 10 | 96052747 | eQTLGen       | eQTLGen cis eQTLs               | HELLS     | G        | 2.6457E-08  | 1,3643E+06 | 0.0001146204788588 |
| rs17109875            | 10 | 96026575 | eQTLcatalogue | BLUEPRINTge monocyte            | NOC3L     | T        | 2.74731E-08 | 0.184435   | 0.000137365        |
| rs11187837            | 10 | 96035980 | eQTLcatalogue | BLUEPRINTge monocyte            | NOC3L     | T        | 2.74823E-08 | 0.184411   | 0.000137411        |
| rs3740360             | 10 | 96025491 | eQTLcatalogue | BLUEPRINTge monocyte            | NOC3L     | A        | 2.76868E-08 | 0.184361   | 0.000138434        |
| rs12220091            | 10 | 96053689 | eQTLGen       | eQTLGen cis eQTLs               | HELLS     | T        | 2.8731E-08  | 1,3121E+06 | 0.0001272669424117 |
| rs11187907            | 10 | 96125361 | GTEEx/v8      | Cells Cultured fibroblasts      | PLCE1-AS1 | T        | 2.91468E-08 | -0.309692  | 3.86001E-30        |
| rs10786156            | 10 | 96014622 | GTEEx/v8      | Skin Not Sun Exposed Suprapubic | NOC3L     | G        | 3.68785E-08 | 0.151155   | 2.01564E-23        |
| rs3891783             | 10 | 96015793 | GTEEx/v8      | Skin Not Sun Exposed Suprapubic | NOC3L     | G        | 3.68785E-08 | 0.151155   | 2.01564E-23        |
| rs57866767            | 10 | 96023077 | GTEEx/v8      | Skin Not Sun Exposed Suprapubic | NOC3L     | C        | 3.68785E-08 | 0.151155   | 2.01564E-23        |
| rs7096883             | 10 | 96069149 | eQTLcatalogue | GENCORDge LCL                   | PLCE1     | G        | 3.69827E-08 | 0.262001   | 0.000184913        |
| rs11187840            | 10 | 96050351 | eQTLcatalogue | TwinsUK ge LCL                  | PLCE1     | A        | 3.7527E-08  | 0.0963516  | 0.000187635        |
| rs753724              | 10 | 96051417 | eQTLcatalogue | TwinsUK ge LCL                  | PLCE1     | G        | 3.7527E-08  | 0.0963516  | 0.000187635        |
| rs11187842            | 10 | 96052511 | eQTLcatalogue | TwinsUK ge LCL                  | PLCE1     | C        | 3.7527E-08  | 0.0963516  | 0.000187635        |
| rs3781266             | 10 | 96052747 | eQTLcatalogue | TwinsUK ge LCL                  | PLCE1     | A        | 3.7527E-08  | 0.0963516  | 0.000187635        |
| rs3740365             | 10 | 96053239 | eQTLcatalogue | TwinsUK ge LCL                  | PLCE1     | T        | 3.7527E-08  | 0.0963516  | 0.000187635        |
| rs12220091            | 10 | 96053689 | eQTLcatalogue | TwinsUK ge LCL                  | PLCE1     | C        | 3.7527E-08  | 0.0963516  | 0.000187635        |
| rs75017201            | 10 | 96055152 | eQTLcatalogue | TwinsUK ge LCL                  | PLCE1     | C        | 3.7527E-08  | 0.0963516  | 0.000187635        |
| rs200197176           | 10 | 96055963 | eQTLcatalogue | GENCORDge LCL                   | PLCE1     | C        | 3.77732E-08 | 0.25545    | 0.000188866        |
| rs11187845            | 10 | 96060198 | PsychENCODE   | PsychENCODE eQTLs               | NOC3L     | A        | 3.87215E-08 | 0.097552   | 6.591E-06          |
| 10:96112261_AAAAAAC_A | 10 | 96112261 | eQTLcatalogue | GENCORDge LCL                   | PLCE1     | AAAAAAAC | 3.88536E-08 | 0.25946    | 0.000194268        |
| rs75409190            | 10 | 96072425 | PsychENCODE   | PsychENCODE eQTLs               | NOC3L     | T        | 3.92785E-08 | 0.102328   | 6.68E-06           |
| rs12217792            | 10 | 96062386 | eQTLcatalogue | GENCORDge LCL                   | PLCE1     | T        | 4.12977E-08 | 0.261741   | 0.000206488        |

|             |    |          |               |                                 |        |      |             |            |                      |
|-------------|----|----------|---------------|---------------------------------|--------|------|-------------|------------|----------------------|
| rs752140    | 10 | 96071396 | GTEx/v8       | Muscle Skeletal                 | NOC3L  | T    | 4.2379E-08  | 0.260214   | 7.35621E-14          |
| rs11187863  | 10 | 96081457 | GTEx/v8       | Muscle Skeletal                 | NOC3L  | G    | 4.2379E-08  | 0.260214   | 7.35621E-14          |
| rs11187866  | 10 | 96085991 | GTEx/v8       | Muscle Skeletal                 | NOC3L  | G    | 4.2379E-08  | 0.260214   | 7.35621E-14          |
| rs11187883  | 10 | 96096866 | GTEx/v8       | Muscle Skeletal                 | NOC3L  | C    | 4.2379E-08  | 0.260214   | 7.35621E-14          |
| rs34309017  | 10 | 96061619 | eQTLcatalogue | GENCORDge LCL                   | PLCE1  | ACTT | 4.27059E-08 | 0.261633   | 0.00021353           |
| rs7080472   | 10 | 96012950 | GTEx/v8       | Skin Not Sun Exposed Suprapubic | NOC3L  | T    | 4.38581E-08 | 0.151839   | 2.01564E-23          |
| rs11187845  | 10 | 96060198 | eQTLGen       | eQTLGen cis eQTLs               | HELLS  | A    | 4.4649E-08  | 1.0279E+06 | 0.0001774510425248   |
| rs11187845  | 10 | 96060198 | eQTLcatalogue | GENCORDge LCL                   | PLCE1  | C    | 4.51948E-08 | 0.261443   | 0.000225974          |
| rs11187882  | 10 | 96095861 | PsychENCODE   | PsychENCODE eQTLs               | NOC3L  | C    | 4.61283E-08 | 0.101642   | 7.755E-06            |
| rs11187856  | 10 | 96076869 | PsychENCODE   | PsychENCODE eQTLs               | NOC3L  | A    | 4.68244E-08 | 0.101697   | 7.864E-06            |
| rs11187847  | 10 | 96063440 | PsychENCODE   | PsychENCODE eQTLs               | NOC3L  | G    | 4.94659E-08 | 0.0960576  | 8.276E-06            |
| rs11187847  | 10 | 96063440 | eQTLGen       | eQTLGen cis eQTLs               | PDLIM1 | G    | 5.6354E-08  | -5.43      | 0.0002400657021921   |
| rs11187864  | 10 | 96082506 | PsychENCODE   | PsychENCODE eQTLs               | NOC3L  | T    | 6.74076E-08 | 0.100225   | 1.104E-05            |
| rs113544984 | 10 | 96127448 | PsychENCODE   | PsychENCODE eQTLs               | NOC3L  | A    | 6.75766E-08 | 0.102717   | 1.106E-05            |
| rs2274224   | 10 | 96039597 | GTEx/v8       | Heart Left Ventricle            | NOC3L  | C    | 7.19999E-08 | 0.19175    | 3.09268E-10          |
| rs10786156  | 10 | 96014622 | GTEx/v8       | Heart Left Ventricle            | NOC3L  | G    | 7.68073E-08 | 0.190819   | 3.09268E-10          |
| rs2274224   | 10 | 96039597 | GTEx/v8       | Skin Not Sun Exposed Suprapubic | NOC3L  | C    | 7.79403E-08 | 0.147484   | 2.01564E-23          |
| rs11187906  | 10 | 96124838 | PsychENCODE   | PsychENCODE eQTLs               | NOC3L  | A    | 7.89484E-08 | 0.102219   | 1.279E-05            |
| rs7080472   | 10 | 96012950 | GTEx/v8       | Esophagus Muscularis            | NOC3L  | T    | 8.19561E-08 | 0.153403   | 2.723E-20            |
| rs11187864  | 10 | 96082506 | eQTLGen       | eQTLGen cis eQTLs               | NOC3L  | T    | 8.2214E-08  | 6.2944E+05 | 0.0003272704386682   |
| rs7078844   | 10 | 96081140 | eQTLGen       | eQTLGen cis eQTLs               | NOC3L  | T    | 9.9519E-08  | -5.3274    | 0.0003455425017277   |
| rs12220091  | 10 | 96053689 | PsychENCODE   | PsychENCODE eQTLs               | NOC3L  | T    | 1.00415E-07 | 0.093271   | 1.6E-05              |
| rs3781266   | 10 | 96052747 | PsychENCODE   | PsychENCODE eQTLs               | NOC3L  | G    | 1.0346E-07  | 0.0931764  | 1.645E-05            |
| rs7100626   | 10 | 96069674 | PsychENCODE   | PsychENCODE eQTLs               | NOC3L  | A    | 1.13755E-07 | 0.097166   | 1.796E-05            |
| rs75017201  | 10 | 96055152 | PsychENCODE   | PsychENCODE eQTLs               | NOC3L  | T    | 1.16476E-07 | 0.0941142  | 1.836E-05            |
| rs7096883   | 10 | 96069149 | PsychENCODE   | PsychENCODE eQTLs               | NOC3L  | A    | 1.25814E-07 | 0.0938882  | 1.972E-05            |
| rs79193572  | 10 | 96119713 | PsychENCODE   | PsychENCODE eQTLs               | NOC3L  | G    | 1.30794E-07 | 0.0996592  | 2.045E-05            |
| rs3891783   | 10 | 96015793 | GTEx/v8       | Heart Left Ventricle            | NOC3L  | G    | 1.31784E-07 | 0.188086   | 3.09268E-10          |
| rs57866767  | 10 | 96023077 | GTEx/v8       | Heart Left Ventricle            | NOC3L  | C    | 1.31784E-07 | 0.188086   | 3.09268E-10          |
| rs10509672  | 10 | 96115957 | PsychENCODE   | PsychENCODE eQTLs               | NOC3L  | C    | 1.32438E-07 | 0.099585   | 2.06849591120053E-05 |
| rs11187845  | 10 | 96060198 | eQTLGen       | eQTLGen cis eQTLs               | PDLIM1 | A    | 1.3348E-07  | -5.274     | 0.0004511560874741   |
| rs11187907  | 10 | 96125361 | GTEx/v8       | Muscle Skeletal                 | NOC3L  | T    | 1.34121E-07 | 0.270996   | 7.35621E-14          |
| rs11187840  | 10 | 96050351 | PsychENCODE   | PsychENCODE eQTLs               | NOC3L  | G    | 1.38003E-07 | 0.0935981  | 2.14874417863028E-05 |
| rs11187838  | 10 | 96038686 | GTEx/v8       | Skin Not Sun Exposed Suprapubic | NOC3L  | A    | 1.42965E-07 | 0.146108   | 2.01564E-23          |
| rs11187838  | 10 | 96038686 | GTEx/v8       | Heart Left Ventricle            | NOC3L  | A    | 1.43393E-07 | 0.187213   | 3.09268E-10          |
| rs11187890  | 10 | 96102758 | GTEx/v8       | Muscle Skeletal                 | NOC3L  | C    | 1.52809E-07 | 0.267003   | 7.35621E-14          |
| rs11187897  | 10 | 96106603 | PsychENCODE   | PsychENCODE eQTLs               | NOC3L  | G    | 1.5365E-07  | 0.0982801  | 2.37379907205247E-05 |
| rs74825688  | 10 | 96119687 | PsychENCODE   | PsychENCODE eQTLs               | NOC3L  | A    | 1.58469E-07 | 0.0973335  | 2.4430127491122E-05  |
| rs11187895  | 10 | 96106240 | GTEx/v8       | Muscle Skeletal                 | NOC3L  | C    | 1.60775E-07 | 0.268698   | 7.35621E-14          |
| rs11187897  | 10 | 96106603 | GTEx/v8       | Muscle Skeletal                 | NOC3L  | G    | 1.60775E-07 | 0.268698   | 7.35621E-14          |

|             |    |          |               |                            |           |   |             |           |                        |
|-------------|----|----------|---------------|----------------------------|-----------|---|-------------|-----------|------------------------|
| rs11187826  | 10 | 95988042 | GTEX/v8       | Cells Cultured fibroblasts | PLCE1-AS1 | G | 1.96608E-07 | -0.25953  | 3.86001E-30            |
| rs11187838  | 10 | 96038686 | GTEX/v8       | Pancreas                   | NOC3L     | A | 2.08079E-07 | 0.254395  | 9.42454E-11            |
| rs7096883   | 10 | 96069149 | GTEX/v8       | Adipose Visceral Omentum   | PLCE1-AS1 | A | 2.1392E-07  | -0.384583 | 0.000644523            |
| rs11187826  | 10 | 95988042 | eQTLcatalogue | GENCORDge T-cell           | PLCE1     | A | 2.19202E-07 | 0.384369  | 0.00109601             |
| rs2274224   | 10 | 96039597 | GTEX/v8       | Esophagus Muscularis       | NOC3L     | C | 2.22318E-07 | 0.14706   | 2.7232299999999997E-20 |
| rs11187840  | 10 | 96050351 | eQTLGen       | eQTLGen cis eQTLs          | NOC3L     | G | 2.3916E-07  | 5.166     | 0.0007907845579078     |
| rs3740359   | 10 | 96100119 | eQTLcatalogue | GENCORDge T-cell           | PLCE1     | C | 2.42044E-07 | 0.403517  | 0.00121022             |
| rs10786156  | 10 | 96014622 | GTEX/v8       | Pancreas                   | NOC3L     | G | 2.53785E-07 | 0.25422   | 9.42454E-11            |
| rs74825688  | 10 | 96119687 | GTEX/v8       | Muscle Skeletal            | NOC3L     | A | 2.59297E-07 | 0.26993   | 7.35621E-14            |
| rs3891783   | 10 | 96015793 | GTEX/v8       | Pancreas                   | NOC3L     | G | 2.63886E-07 | 0.253623  | 9.42454E-11            |
| rs57866767  | 10 | 96023077 | GTEX/v8       | Pancreas                   | NOC3L     | C | 2.63886E-07 | 0.253623  | 9.42454E-11            |
| rs75017201  | 10 | 96055152 | eQTLGen       | eQTLGen cis eQTLs          | NOC3L     | T | 2.7328E-07  | 5.1411    | 0.0009131569139023     |
| rs79193572  | 10 | 96119713 | GTEX/v8       | Muscle Skeletal            | NOC3L     | G | 2.73463E-07 | 0.271213  | 7.35621E-14            |
| rs11187842  | 10 | 96052511 | eQTLGen       | eQTLGen cis eQTLs          | NOC3L     | T | 2.7357E-07  | 5.1409    | 0.0009131569139023     |
| rs752140    | 10 | 96071396 | GTEX/v8       | Adipose Visceral Omentum   | PLCE1-AS1 | T | 2.74207E-07 | -0.370555 | 0.000644523            |
| rs11187838  | 10 | 96038686 | GTEX/v8       | Colon Transverse           | NOC3L     | A | 2.82625E-07 | 0.148369  | 4.35915E-08            |
| rs3740365   | 10 | 96053239 | eQTLGen       | eQTLGen cis eQTLs          | NOC3L     | A | 2.8395E-07  | 5.134     | 0.0009374805984975     |
| rs113544984 | 10 | 96127448 | GTEX/v8       | Muscle Skeletal            | NOC3L     | A | 2.88143E-07 | 0.271515  | 7.35621E-14            |
| rs11187838  | 10 | 96038686 | eQTLcatalogue | TwinsUK ge skin            | NOC3L     | G | 2.89308E-07 | 0.0989956 | 0.00144654             |
| rs79746649  | 10 | 96120218 | GTEX/v8       | Muscle Skeletal            | NOC3L     | T | 2.93423E-07 | 0.267286  | 7.35621E-14            |
| rs3740360   | 10 | 96025491 | GTEX/v8       | Cells Cultured fibroblasts | PLCE1-AS1 | C | 3.03193E-07 | -0.26005  | 3.86001E-30            |
| rs17109875  | 10 | 96026575 | GTEX/v8       | Cells Cultured fibroblasts | PLCE1-AS1 | C | 3.03193E-07 | -0.26005  | 3.86001E-30            |
| rs11187837  | 10 | 96035980 | GTEX/v8       | Cells Cultured fibroblasts | PLCE1-AS1 | C | 3.03193E-07 | -0.26005  | 3.86001E-30            |
| rs7101207   | 10 | 96122857 | GTEX/v8       | Muscle Skeletal            | NOC3L     | A | 3.07502E-07 | 0.26767   | 7.35621E-14            |
| rs112252876 | 10 | 96123355 | GTEX/v8       | Muscle Skeletal            | NOC3L     | T | 3.07502E-07 | 0.26767   | 7.35621E-14            |
| rs3781266   | 10 | 96052747 | eQTLGen       | eQTLGen cis eQTLs          | NOC3L     | G | 3.0781E-07  | 5.1188    | 0.0009988212668279     |
| rs778275808 | 10 | 96114212 | GTEX/v8       | Muscle Skeletal            | NOC3L     | T | 3.11067E-07 | 0.268918  | 7.35621E-14            |
| rs10509672  | 10 | 96115957 | GTEX/v8       | Muscle Skeletal            | NOC3L     | C | 3.11067E-07 | 0.268918  | 7.35621E-14            |
| rs753724    | 10 | 96051417 | GTEX/v8       | Adipose Visceral Omentum   | PLCE1-AS1 | T | 3.13234E-07 | -0.372223 | 0.000644523            |
| rs11187842  | 10 | 96052511 | GTEX/v8       | Adipose Visceral Omentum   | PLCE1-AS1 | T | 3.13234E-07 | -0.372223 | 0.000644523            |
| rs3781266   | 10 | 96052747 | GTEX/v8       | Adipose Visceral Omentum   | PLCE1-AS1 | G | 3.13234E-07 | -0.372223 | 0.000644523            |
| rs3740365   | 10 | 96053239 | GTEX/v8       | Adipose Visceral Omentum   | PLCE1-AS1 | A | 3.13234E-07 | -0.372223 | 0.000644523            |
| rs12220091  | 10 | 96053689 | GTEX/v8       | Adipose Visceral Omentum   | PLCE1-AS1 | T | 3.13234E-07 | -0.372223 | 0.000644523            |
| rs11187890  | 10 | 96102758 | PsychENCODE   | PsychENCODE eQTLs          | NOC3L     | C | 3.24704E-07 | 0.09449   | 4.7507000772688E-05    |
| rs12220091  | 10 | 96053689 | eQTLGen       | eQTLGen cis eQTLs          | NOC3L     | T | 3.249E-07   | 5.1085    | 0.0010662699150703     |
| rs753724    | 10 | 96051417 | eQTLGen       | eQTLGen cis eQTLs          | NOC3L     | T | 3.294E-07   | 5.1058    | 0.0010722697409198     |
| rs11187870  | 10 | 96087866 | eQTLGen       | eQTLGen cis eQTLs          | HELLS     | C | 3.3185E-07  | 5.1046    | 0.001078267335936      |
| rs112252876 | 10 | 96123355 | PsychENCODE   | PsychENCODE eQTLs          | NOC3L     | T | 3.46649E-07 | 0.0955999 | 5.04639294195705E-05   |

|             |    |          |               |                                   |           |    |             |           |                        |
|-------------|----|----------|---------------|-----------------------------------|-----------|----|-------------|-----------|------------------------|
| rs7080472   | 10 | 96012950 | eQTLcatalogue | TwinsUK geskin                    | NOC3L     | G  | 3.47022E-07 | 0.0981732 | 0.00173511             |
| rs7100626   | 10 | 96069674 | GTEX/v8       | Adipose Visceral Omentum          | PLCE1-AS1 | A  | 3.47683E-07 | -0.384603 | 0.000644523            |
| rs11187852  | 10 | 96070132 | GTEX/v8       | Adipose Visceral Omentum          | PLCE1-AS1 | A  | 3.47683E-07 | -0.384603 | 0.000644523            |
| rs10786156  | 10 | 96014622 | eQTLcatalogue | TwinsUK geskin                    | NOC3L     | C  | 3.48198E-07 | 0.0985294 | 0.00174099             |
| rs3891783   | 10 | 96015793 | eQTLcatalogue | TwinsUK geskin                    | NOC3L     | C  | 3.48198E-07 | 0.0985294 | 0.00174099             |
| rs57866767  | 10 | 96023077 | eQTLcatalogue | TwinsUK geskin                    | NOC3L     | T  | 3.48198E-07 | 0.0985294 | 0.00174099             |
| rs2274224   | 10 | 96039597 | GTEX/v8       | Pancreas                          | NOC3L     | C  | 3.48768E-07 | 0.251721  | 9.42454E-11            |
| rs79746649  | 10 | 96120218 | PsychENCODE   | PsychENCODE eQTLs                 | NOC3L     | T  | 3.54686E-07 | 0.094936  | 5.1543436990261E-05    |
| rs75409190  | 10 | 96072425 | GTEX/v8       | Muscle Skeletal                   | NOC3L     | T  | 3.61127E-07 | 0.257218  | 7.35621E-14            |
| rs771106747 | 10 | 96072873 | GTEX/v8       | Muscle Skeletal                   | NOC3L     | C  | 3.61127E-07 | 0.257218  | 7.35621E-14            |
| rs749295068 | 10 | 96073508 | GTEX/v8       | Muscle Skeletal                   | NOC3L     | A  | 3.61127E-07 | 0.257218  | 7.35621E-14            |
| rs11187856  | 10 | 96076869 | GTEX/v8       | Muscle Skeletal                   | NOC3L     | A  | 3.61127E-07 | 0.257218  | 7.35621E-14            |
| rs11187882  | 10 | 96095861 | GTEX/v8       | Muscle Skeletal                   | NOC3L     | C  | 3.61127E-07 | 0.257218  | 7.35621E-14            |
| rs10786156  | 10 | 96014622 | GTEX/v8       | Esophagus Muscularis              | NOC3L     | G  | 3.66095E-07 | 0.145079  | 2.7232299999999997E-20 |
| rs7101207   | 10 | 96122857 | PsychENCODE   | PsychENCODE eQTLs                 | NOC3L     | A  | 3.79043E-07 | 0.0952988 | 5.47969109279773E-05   |
| rs11187863  | 10 | 96081457 | GTEX/v8       | Adipose Visceral Omentum          | PLCE1-AS1 | G  | 3.88596E-07 | -0.364458 | 0.000644523            |
| rs11187866  | 10 | 96085991 | GTEX/v8       | Adipose Visceral Omentum          | PLCE1-AS1 | G  | 3.88596E-07 | -0.364458 | 0.000644523            |
| rs11187883  | 10 | 96096866 | GTEX/v8       | Adipose Visceral Omentum          | PLCE1-AS1 | C  | 3.88596E-07 | -0.364458 | 0.000644523            |
| rs11187826  | 10 | 95988042 | GTEX/v8       | Cells EBV-transformed lymphocytes | PLCE1     | G  | 3.8943E-07  | 0.687209  | 1.20882E-07            |
| rs7100626   | 10 | 96069674 | GTEX/v8       | Muscle Skeletal                   | NOC3L     | A  | 3.96229E-07 | 0.253129  | 7.35621E-14            |
| rs11187852  | 10 | 96070132 | GTEX/v8       | Muscle Skeletal                   | NOC3L     | A  | 3.96229E-07 | 0.253129  | 7.35621E-14            |
| rs11187877  | 10 | 96092121 | GTEX/v8       | Muscle Skeletal                   | NOC3L     | A  | 3.96229E-07 | 0.253129  | 7.35621E-14            |
| rs11187844  | 10 | 96056629 | eQTLcatalogue | TwinsUK geLCL                     | PLCE1     | C  | 3.97134E-07 | 0.0760026 | 0.00198567             |
| rs11187864  | 10 | 96082506 | GTEX/v8       | Muscle Skeletal                   | NOC3L     | T  | 4.12789E-07 | 0.254895  | 7.35621E-14            |
| rs145707916 | 10 | 96092992 | GTEX/v8       | Muscle Skeletal                   | NOC3L     | GA | 4.12789E-07 | 0.254895  | 7.35621E-14            |
| rs750148755 | 10 | 96095271 | GTEX/v8       | Muscle Skeletal                   | NOC3L     | C  | 4.12789E-07 | 0.254895  | 7.35621E-14            |
| rs11187844  | 10 | 96056629 | PsychENCODE   | PsychENCODE eQTLs                 | NOC3L     | A  | 4.17472E-07 | 0.0796474 | 5.99069241685944E-05   |
| rs3740360   | 10 | 96025491 | eQTLcatalogue | GENCORD geLCL                     | PLCE1     | A  | 4.30425E-07 | 0.214894  | 0.00215212             |
| rs17109875  | 10 | 96026575 | eQTLcatalogue | GENCORD geLCL                     | PLCE1     | T  | 4.30538E-07 | 0.214855  | 0.00215269             |
| rs11187837  | 10 | 96035980 | eQTLcatalogue | GENCORD geLCL                     | PLCE1     | T  | 4.31649E-07 | 0.214915  | 0.00215825             |
| rs10786156  | 10 | 96014622 | GTEX/v8       | Colon Transverse                  | NOC3L     | G  | 4.43133E-07 | 0.147768  | 4.35915E-08            |
| rs3891783   | 10 | 96015793 | GTEX/v8       | Colon Transverse                  | NOC3L     | G  | 4.43133E-07 | 0.147768  | 4.35915E-08            |
| rs57866767  | 10 | 96023077 | GTEX/v8       | Colon Transverse                  | NOC3L     | C  | 4.43133E-07 | 0.147768  | 4.35915E-08            |
| rs11187840  | 10 | 96050351 | GTEX/v8       | Adipose Visceral Omentum          | PLCE1-AS1 | G  | 4.88307E-07 | -0.372062 | 0.000644523            |
| rs75017201  | 10 | 96055152 | GTEX/v8       | Adipose Visceral Omentum          | PLCE1-AS1 | T  | 4.88307E-07 | -0.372062 | 0.000644523            |
| rs7101207   | 10 | 96122857 | GTEX/v8       | Adipose Visceral Omentum          | PLCE1-AS1 | A  | 4.96061E-07 | -0.391535 | 0.000644523            |
| rs112252876 | 10 | 96123355 | GTEX/v8       | Adipose Visceral Omentum          | PLCE1-AS1 | T  | 4.96061E-07 | -0.391535 | 0.000644523            |
| rs11187890  | 10 | 96102758 | GTEX/v8       | Adipose Visceral Omentum          | PLCE1-AS1 | C  | 4.97744E-07 | -0.382886 | 0.000644523            |



|                            |    |          |               |                            |           |          |             |           |                       |
|----------------------------|----|----------|---------------|----------------------------|-----------|----------|-------------|-----------|-----------------------|
| rs3891783                  | 10 | 96015793 | GTEx/v8       | Esophagus Muscularis       | NOC3L     | G        | 4.98044E-07 | 0.143689  | 2.723229999999997E-20 |
| rs57866767                 | 10 | 96023077 | GTEx/v8       | Esophagus Muscularis       | NOC3L     | C        | 4.98044E-07 | 0.143689  | 2.723229999999997E-20 |
| rs11187877                 | 10 | 96092121 | GTEx/v8       | Adipose Visceral Omentum   | PLCE1-AS1 | A        | 5.00681E-07 | -0.377836 | 0.000644523           |
| rs11187838                 | 10 | 96038686 | GTEx/v8       | Skin Sun Exposed Lower leg | PLCE1     | A        | 5.53023E-07 | 0.1259    | 0.000666445           |
| rs7080472                  | 10 | 96012950 | GTEx/v8       | Heart Left Ventricle       | NOC3L     | T        | 5.53501E-07 | 0.180376  | 3.09268E-10           |
| rs2274224                  | 10 | 96039597 | GTEx/v8       | Colon Transverse           | NOC3L     | C        | 5.7305E-07  | 0.145736  | 4.35915E-08           |
| rs10786156                 | 10 | 96014622 | GTEx/v8       | Skin Sun Exposed Lower leg | PLCE1     | G        | 5.83892E-07 | 0.125559  | 0.000666445           |
| rs11187870                 | 10 | 96087866 | GTEx/v8       | Muscle Skeletal            | NOC3L     | C        | 5.88352E-07 | 0.253513  | 7.35621E-14           |
| rs7080472                  | 10 | 96012950 | GTEx/v8       | Artery Aorta               | NOC3L     | T        | 5.98593E-07 | 0.163228  | 1.86975E-08           |
| rs11187845                 | 10 | 96060198 | GTEx/v8       | Adipose Visceral Omentum   | PLCE1-AS1 | A        | 6.06255E-07 | -0.367463 | 0.000644523           |
| rs11187847                 | 10 | 96063440 | GTEx/v8       | Adipose Visceral Omentum   | PLCE1-AS1 | G        | 6.06255E-07 | -0.367463 | 0.000644523           |
| rs10786156                 | 10 | 96014622 | GTEx/v8       | Artery Aorta               | NOC3L     | G        | 6.18786E-07 | 0.162455  | 1.86975E-08           |
| rs7080472                  | 10 | 96012950 | GTEx/v8       | Colon Transverse           | NOC3L     | T        | 6.21534E-07 | 0.145514  | 4.35915E-08           |
| rs3891783                  | 10 | 96015793 | GTEx/v8       | Skin Sun Exposed Lower leg | PLCE1     | G        | 6.68793E-07 | 0.125003  | 0.000666445           |
| rs57866767                 | 10 | 96023077 | GTEx/v8       | Skin Sun Exposed Lower leg | PLCE1     | C        | 6.68793E-07 | 0.125003  | 0.000666445           |
| rs7078844                  | 10 | 96081140 | GTEx/v8       | Nerve Tibial               | HELLS     | C        | 7.10111E-07 | -0.252012 | 5.533110000000001E-26 |
| rs7080472                  | 10 | 96012950 | GTEx/v8       | Pancreas                   | NOC3L     | T        | 7.15314E-07 | 0.239439  | 9.42454E-11           |
| rs3891783                  | 10 | 96015793 | GTEx/v8       | Artery Tibial              | PLCE1     | G        | 7.18774E-07 | 0.123127  | 1.21915E-07           |
| rs57866767                 | 10 | 96023077 | GTEx/v8       | Artery Tibial              | PLCE1     | C        | 7.18774E-07 | 0.123127  | 1.21915E-07           |
| 10:96112261_A<br>AAAAAAC_A | 10 | 96112261 | eQTLcatalogue | GENCORDge T-cell           | PLCE1     | AAAAAAAC | 7.20664E-07 | 0.382443  | 0.00360332            |
| rs7080472                  | 10 | 96012950 | GTEx/v8       | Artery Tibial              | PLCE1     | T        | 8.33992E-07 | 0.123308  | 1.21915E-07           |
| rs79746649                 | 10 | 96120218 | GTEx/v8       | Adipose Visceral Omentum   | PLCE1-AS1 | T        | 8.5631E-07  | -0.38324  | 0.000644523           |
| rs11187838                 | 10 | 96038686 | GTEx/v8       | Esophagus Muscularis       | NOC3L     | A        | 8.82021E-07 | 0.140769  | 2.723229999999997E-20 |
| rs79746649                 | 10 | 96120218 | eQTLcatalogue | GENCORDge T-cell           | PLCE1     | C        | 9.21774E-07 | 0.38583   | 0.00460887            |
| rs752140                   | 10 | 96071396 | eQTLcatalogue | GENCORDge T-cell           | PLCE1     | C        | 9.39565E-07 | 0.386047  | 0.00469783            |
| rs11187890                 | 10 | 96102758 | eQTLcatalogue | GENCORDge T-cell           | PLCE1     | T        | 9.44539E-07 | 0.385938  | 0.00472269            |
| rs11187882                 | 10 | 96095861 | eQTLcatalogue | GENCORDge T-cell           | PLCE1     | A        | 9.46492E-07 | 0.385876  | 0.00473246            |
| rs11187856                 | 10 | 96076869 | eQTLcatalogue | GENCORDge T-cell           | PLCE1     | G        | 9.48129E-07 | 0.385897  | 0.00474064            |
| rs749295068                | 10 | 96073508 | eQTLcatalogue | GENCORDge T-cell           | PLCE1     | AGAT     | 9.48173E-07 | 0.385896  | 0.00474087            |
| rs771106747                | 10 | 96072873 | eQTLcatalogue | GENCORDge T-cell           | PLCE1     | CTA      | 9.50361E-07 | 0.385857  | 0.00475181            |
| rs11187863                 | 10 | 96081457 | eQTLcatalogue | GENCORDge T-cell           | PLCE1     | T        | 9.50792E-07 | 0.385788  | 0.00475396            |
| rs11187864                 | 10 | 96082506 | eQTLcatalogue | GENCORDge T-cell           | PLCE1     | C        | 9.50792E-07 | 0.385788  | 0.00475396            |
| rs11187866                 | 10 | 96085991 | eQTLcatalogue | GENCORDge T-cell           | PLCE1     | C        | 9.50792E-07 | 0.385788  | 0.00475396            |
| rs11187870                 | 10 | 96087866 | eQTLcatalogue | GENCORDge T-cell           | PLCE1     | G        | 9.50792E-07 | 0.385788  | 0.00475396            |
| rs11187877                 | 10 | 96092121 | eQTLcatalogue | GENCORDge T-cell           | PLCE1     | G        | 9.50792E-07 | 0.385788  | 0.00475396            |
| rs145707916                | 10 | 96092992 | eQTLcatalogue | GENCORDge T-cell           | PLCE1     | G        | 9.50792E-07 | 0.385788  | 0.00475396            |
| rs7100626                  | 10 | 96069674 | eQTLcatalogue | GENCORDge T-cell           | PLCE1     | C        | 9.51672E-07 | 0.385791  | 0.00475836            |
| rs11187852                 | 10 | 96070132 | eQTLcatalogue | GENCORDge T-cell           | PLCE1     | G        | 9.51672E-07 | 0.385791  | 0.00475836            |
| rs75409190                 | 10 | 96072425 | eQTLcatalogue | GENCORDge T-cell           | PLCE1     | C        | 9.51792E-07 | 0.385813  | 0.00475896            |
| rs750148755                | 10 | 96095271 | eQTLcatalogue | GENCORDge T-cell           | PLCE1     | CATTTT   | 9.54195E-07 | 0.385738  | 0.00477098            |

|             |    |          |               |                            |           |      |                  |                |                    |
|-------------|----|----------|---------------|----------------------------|-----------|------|------------------|----------------|--------------------|
| rs3740359   | 10 | 96100119 | DICE          | T CD4 TH1                  | PLCE1     | T    | 9.6971259049E-07 | 0.898080559827 | 0.049              |
| rs34309017  | 10 | 96061619 | GTEEx/v8      | Adipose Visceral Omentum   | PLCE1-AS1 | A    | 9.70292E-07      | -0.366366      | 0.000644523        |
| rs12217792  | 10 | 96062386 | GTEEx/v8      | Adipose Visceral Omentum   | PLCE1-AS1 | C    | 9.70292E-07      | -0.366366      | 0.000644523        |
| rs11187847  | 10 | 96063440 | eQTLcatalogue | GENCORDge LCL              | PLCE1     | C    | 9.70592E-07      | 0.233046       | 0.00485296         |
| rs11187895  | 10 | 96106240 | eQTLcatalogue | GENCORDge T-cell           | PLCE1     | G    | 9.72079E-07      | 0.38546        | 0.00486039         |
| rs11187897  | 10 | 96106603 | eQTLcatalogue | GENCORDge T-cell           | PLCE1     | A    | 9.73083E-07      | 0.385427       | 0.00486541         |
| rs11187883  | 10 | 96096866 | eQTLcatalogue | GENCORDge T-cell           | PLCE1     | T    | 9.73666E-07      | 0.385218       | 0.00486833         |
| rs10509672  | 10 | 96115957 | eQTLcatalogue | GENCORDge T-cell           | PLCE1     | G    | 9.83222E-07      | 0.385218       | 0.00491611         |
| rs778275808 | 10 | 96114212 | eQTLcatalogue | GENCORDge T-cell           | PLCE1     | TCTC | 9.90757E-07      | 0.385175       | 0.00495378         |
| rs79193572  | 10 | 96119713 | eQTLcatalogue | GENCORDge T-cell           | PLCE1     | A    | 1.00326E-06      | 0.384625       | 0.0050163          |
| rs753724    | 10 | 96051417 | eQTLGen       | eQTLGen cis eQTLs          | PDLIM1    | T    | 1.0311E-06       | -4.8856        | 0.0031823745410036 |
| rs2274224   | 10 | 96039597 | GTEEx/v8      | Artery Aorta               | NOC3L     | C    | 1.05756E-06      | 0.158624       | 1.86975E-08        |
| rs7080472   | 10 | 96012950 | GTEEx/v8      | Colon Sigmoid              | NOC3L     | T    | 1.10378E-06      | 0.193204       | 1.73346E-11        |
| rs74825688  | 10 | 96119687 | eQTLcatalogue | GENCORDge T-cell           | PLCE1     | G    | 1.1056E-06       | 0.382039       | 0.005528           |
| rs10786156  | 10 | 96014622 | GTEEx/v8      | Artery Tibial              | PLCE1     | G    | 1.11843E-06      | 0.12099        | 1.21915E-07        |
| rs11187842  | 10 | 96052511 | eQTLGen       | eQTLGen cis eQTLs          | PDLIM1    | T    | 1.1205E-06       | -4.869         | 0.003400403645037  |
| rs3740365   | 10 | 96053239 | eQTLGen       | eQTLGen cis eQTLs          | PDLIM1    | A    | 1.1515E-06       | -4.8636        | 0.0034784203447854 |
| rs74825688  | 10 | 96119687 | GTEEx/v8      | Adipose Visceral Omentum   | PLCE1-AS1 | A    | 1.16396E-06      | -0.375083      | 0.000644523        |
| rs11187845  | 10 | 96060198 | eQTLcatalogue | GENCORDge T-cell           | PLCE1     | C    | 1.18769E-06      | 0.380044       | 0.00593845         |
| rs34309017  | 10 | 96061619 | eQTLcatalogue | GENCORDge T-cell           | PLCE1     | ACTT | 1.19242E-06      | 0.37961        | 0.0059621          |
| rs12217792  | 10 | 96062386 | eQTLcatalogue | GENCORDge T-cell           | PLCE1     | T    | 1.19698E-06      | 0.379327       | 0.0059849          |
| rs11187847  | 10 | 96063440 | eQTLcatalogue | GENCORDge T-cell           | PLCE1     | C    | 1.20172E-06      | 0.379013       | 0.0060086          |
| rs2274224   | 10 | 96039597 | GTEEx/v8      | Skin Sun Exposed Lower leg | PLCE1     | C    | 1.20492E-06      | 0.12172        | 0.000666445        |
| rs7096883   | 10 | 96069149 | eQTLcatalogue | GENCORDge T-cell           | PLCE1     | G    | 1.21204E-06      | 0.378282       | 0.0060602          |
| rs2274224   | 10 | 96039597 | GTEEx/v8      | Artery Tibial              | PLCE1     | C    | 1.26595E-06      | 0.120273       | 1.21915E-07        |
| rs3891783   | 10 | 96015793 | GTEEx/v8      | Artery Aorta               | NOC3L     | G    | 1.312E-06        | 0.158283       | 1.86975E-08        |
| rs57866767  | 10 | 96023077 | GTEEx/v8      | Artery Aorta               | NOC3L     | C    | 1.312E-06        | 0.158283       | 1.86975E-08        |
| rs3740359   | 10 | 96100119 | GTEEx/v8      | Muscle Skeletal            | NOC3L     | T    | 1.31362E-06      | 0.221014       | 7.35621E-14        |
| rs75017201  | 10 | 96055152 | eQTLcatalogue | GENCORDge T-cell           | PLCE1     | C    | 1.33148E-06      | 0.367203       | 0.0066574          |
| rs12220091  | 10 | 96053689 | eQTLcatalogue | GENCORDge T-cell           | PLCE1     | C    | 1.33264E-06      | 0.367032       | 0.0066632          |
| rs3740365   | 10 | 96053239 | eQTLcatalogue | GENCORDge T-cell           | PLCE1     | T    | 1.33285E-06      | 0.367006       | 0.00666425         |
| rs753724    | 10 | 96051417 | eQTLcatalogue | GENCORDge T-cell           | PLCE1     | G    | 1.3329E-06       | 0.367893       | 0.0066645          |
| rs3781266   | 10 | 96052747 | eQTLcatalogue | GENCORDge T-cell           | PLCE1     | A    | 1.33329E-06      | 0.366955       | 0.00666645         |
| rs11187842  | 10 | 96052511 | eQTLcatalogue | GENCORDge T-cell           | PLCE1     | C    | 1.33345E-06      | 0.366938       | 0.00666725         |
| rs11187840  | 10 | 96050351 | eQTLcatalogue | GENCORDge T-cell           | PLCE1     | A    | 1.36086E-06      | 0.368475       | 0.0068043          |
| rs11187840  | 10 | 96050351 | eQTLGen       | eQTLGen cis eQTLs          | PDLIM1    | G    | 1.3708E-06       | -4.8291        | 0.0041417591801878 |
| rs769015184 | 10 | 96049708 | eQTLcatalogue | GENCORDge T-cell           | PLCE1     | AC   | 1.38142E-06      | 0.36852        | 0.0069071          |
| rs11187844  | 10 | 96056629 | BIOSQTL       | BIOS eQTL geneLevel        | TBC1D12   | A    | 1.42697E-06      | 4.8213458      | 0.0011833705299216 |
| rs75409190  | 10 | 96072425 | GTEEx/v8      | Adipose Visceral Omentum   | PLCE1-AS1 | T    | 1.56355E-06      | -0.365914      | 0.000644523        |
| rs771106747 | 10 | 96072873 | GTEEx/v8      | Adipose Visceral Omentum   | PLCE1-AS1 | C    | 1.56355E-06      | -0.365914      | 0.000644523        |

|                       |    |          |               |                                       |           |    |                   |                |                      |
|-----------------------|----|----------|---------------|---------------------------------------|-----------|----|-------------------|----------------|----------------------|
| rs11187856            | 10 | 96076869 | GTEx/v8       | Adipose Visceral Omentum              | PLCE1-AS1 | A  | 1.56355E-06       | -0.365914      | 0.000644523          |
| rs75017201            | 10 | 96055152 | eQTLGen       | eQTLGen cis eQTLs                     | PDLIM1    | T  | 1.5803E-06        | -4.8007        | 0.0046780776024852   |
| rs2077218             | 10 | 96071561 | GTEx/v8       | Nerve Tibial                          | HELLS     | A  | 1.61786E-06       | -0.253004      | 5.53311000000001E-26 |
| rs11187838            | 10 | 96038686 | BIOSQTL       | BIOS eQTL geneLevel                   | PLCE1     | A  | 1.65622E-06       | 4.7915542      | 0.0013530961111398   |
| rs3740359             | 10 | 96100119 | GTEx/v8       | Cells EBV-transformed lymphocytes     | PLCE1     | T  | 1.67783E-06       | 0.600178       | 1.20882E-07          |
| rs7080472             | 10 | 96012950 | GTEx/v8       | Thyroid                               | TBC1D12   | T  | 1.69106E-06       | -0.142239      | 1.4449E-10           |
| rs3781266             | 10 | 96052747 | eQTLGen       | eQTLGen cis eQTLs                     | PDLIM1    | G  | 1.7971E-06        | -4.7749        | 0.0053287912890078   |
| rs7078844             | 10 | 96081140 | BIOSQTL       | BIOS eQTL geneLevel                   | TBC1D12   | T  | 1.81863E-06       | -4.77257       | 0.0014319563201813   |
| rs12220091            | 10 | 96053689 | eQTLGen       | eQTLGen cis eQTLs                     | PDLIM1    | T  | 1.9017E-06        | -4.7636        | 0.0055572444822764   |
| rs7080472             | 10 | 96012950 | GTEx/v8       | Skin Sun Exposed Lower leg            | PLCE1     | T  | 1.96357E-06       | 0.12091        | 0.000666445          |
| rs11187863            | 10 | 96081457 | DICE          | T CD4 TH1                             | PLCE1     | G  | 2.1750695116E-06  | 0.887821580882 | 0.049                |
| rs11187866            | 10 | 96085991 | DICE          | T CD4 TH1                             | PLCE1     | G  | 2.1750695116E-06  | 0.887821580882 | 0.049                |
| rs11187877            | 10 | 96092121 | DICE          | T CD4 TH1                             | PLCE1     | A  | 2.1750695116E-06  | 0.887821580882 | 0.049                |
| rs11187883            | 10 | 96096866 | DICE          | T CD4 TH1                             | PLCE1     | C  | 2.1750695116E-06  | 0.887821580882 | 0.049                |
| rs11187890            | 10 | 96102758 | DICE          | T CD4 TH1                             | PLCE1     | C  | 2.1750695116E-06  | 0.887821580882 | 0.049                |
| rs11187864            | 10 | 96082506 | DICE          | T CD4 TH1                             | PLCE1     | T  | 2.18983857164E-06 | 0.900338651896 | 0.049                |
| rs11187870            | 10 | 96087866 | DICE          | T CD4 TH1                             | PLCE1     | C  | 2.18983857164E-06 | 0.900338651896 | 0.049                |
| rs145707916           | 10 | 96092992 | DICE          | T CD4 TH1                             | PLCE1     | GA | 2.18983857164E-06 | 0.900338651896 | 0.049                |
| rs750148755           | 10 | 96095271 | DICE          | T CD4 TH1                             | PLCE1     | C  | 2.18983857164E-06 | 0.900338651896 | 0.049                |
| rs11187882            | 10 | 96095861 | DICE          | T CD4 TH1                             | PLCE1     | C  | 2.18983857164E-06 | 0.900338651896 | 0.049                |
| rs11187895            | 10 | 96106240 | DICE          | T CD4 TH1                             | PLCE1     | C  | 2.18983857164E-06 | 0.900338651896 | 0.049                |
| rs11187897            | 10 | 96106603 | DICE          | T CD4 TH1                             | PLCE1     | G  | 2.18983857164E-06 | 0.900338651896 | 0.049                |
| rs11187863            | 10 | 96081457 | GTEx/v8       | Thyroid                               | NOC3L     | G  | 2.19445E-06       | -0.172139      | 0.00220997           |
| rs11187866            | 10 | 96085991 | GTEx/v8       | Thyroid                               | NOC3L     | G  | 2.19445E-06       | -0.172139      | 0.00220997           |
| rs11187883            | 10 | 96096866 | GTEx/v8       | Thyroid                               | NOC3L     | C  | 2.19445E-06       | -0.172139      | 0.00220997           |
| rs11187864            | 10 | 96082506 | GTEx/v8       | Adipose Visceral Omentum              | PLCE1-AS1 | T  | 2.20876E-06       | -0.359052      | 0.000644523          |
| rs145707916           | 10 | 96092992 | GTEx/v8       | Adipose Visceral Omentum              | PLCE1-AS1 | GA | 2.20876E-06       | -0.359052      | 0.000644523          |
| rs750148755           | 10 | 96095271 | GTEx/v8       | Adipose Visceral Omentum              | PLCE1-AS1 | C  | 2.20876E-06       | -0.359052      | 0.000644523          |
| rs11187895            | 10 | 96106240 | GTEx/v8       | Adipose Visceral Omentum              | PLCE1-AS1 | C  | 2.23083E-06       | -0.36371       | 0.000644523          |
| rs11187897            | 10 | 96106603 | GTEx/v8       | Adipose Visceral Omentum              | PLCE1-AS1 | G  | 2.23083E-06       | -0.36371       | 0.000644523          |
| rs749295068           | 10 | 96073508 | GTEx/v8       | Adipose Visceral Omentum              | PLCE1-AS1 | A  | 2.24181E-06       | -0.362577      | 0.000644523          |
| rs11187838            | 10 | 96038686 | GTEx/v8       | Brain Nucleus accumbens basal ganglia | NOC3L     | A  | 2.24908E-06       | 0.20893        | 0.000164102          |
| rs752140              | 10 | 96071396 | GTEx/v8       | Thyroid                               | NOC3L     | T  | 2.28464E-06       | -0.172467      | 0.00220997           |
| rs11187837            | 10 | 96035980 | eQTLcatalogue | GENCORDge T-cell                      | PLCE1     | T  | 2.31571E-06       | 0.335699       | 0.0115785            |
| rs17109875            | 10 | 96026575 | eQTLcatalogue | GENCORDge T-cell                      | PLCE1     | T  | 2.32943E-06       | 0.335494       | 0.0116471            |
| rs3740360             | 10 | 96025491 | eQTLcatalogue | GENCORDge T-cell                      | PLCE1     | A  | 2.33243E-06       | 0.335539       | 0.0116621            |
| 10:96112261_AAAAAAC_A | 10 | 96112261 | DICE          | T CD4 TH1                             | PLCE1     | A  | 2.33720404313E-06 | 0.948074989332 | 0.049                |
| rs11187845            | 10 | 96060198 | GTEx/v8       | Muscle Skeletal                       | NOC3L     | A  | 2.44081E-06       | 0.230282       | 7.35621E-14          |

|             |    |          |               |                                       |           |   |                   |                |                    |
|-------------|----|----------|---------------|---------------------------------------|-----------|---|-------------------|----------------|--------------------|
| rs11187847  | 10 | 96063440 | GTEx/v8       | Muscle Skeletal                       | NOC3L     | G | 2.44081E-06       | 0.230282       | 7.35621E-14        |
| rs7080472   | 10 | 96012950 | GTEx/v8       | Brain Cerebellar Hemisphere           | NOC3L     | T | 2.48212E-06       | 0.273389       | 1.25929E-05        |
| rs10786156  | 10 | 96014622 | BIOSQTL       | BIOS eQTL geneLevel                   | PLCE1     | G | 2.48935E-06       | 4.7090961      | 0.0019017998266455 |
| rs3891783   | 10 | 96015793 | BIOSQTL       | BIOS eQTL geneLevel                   | PLCE1     | G | 2.48935E-06       | 4.7090961      | 0.0019017998266455 |
| rs57866767  | 10 | 96023077 | BIOSQTL       | BIOS eQTL geneLevel                   | PLCE1     | C | 2.48935E-06       | 4.7090961      | 0.0019017998266455 |
| rs11187838  | 10 | 96038686 | GTEx/v8       | Artery Aorta                          | NOC3L     | A | 2.9258E-06        | 0.151503       | 1.86975E-08        |
| rs34309017  | 10 | 96061619 | GTEx/v8       | Muscle Skeletal                       | NOC3L     | A | 3.04275E-06       | 0.230309       | 7.35621E-14        |
| rs12217792  | 10 | 96062386 | GTEx/v8       | Muscle Skeletal                       | NOC3L     | C | 3.04275E-06       | 0.230309       | 7.35621E-14        |
| rs11187882  | 10 | 96095861 | GTEx/v8       | Adipose Visceral Omentum              | PLCE1-AS1 | C | 3.14149E-06       | -0.35578       | 0.000644523        |
| rs7096883   | 10 | 96069149 | GTEx/v8       | Muscle Skeletal                       | NOC3L     | A | 3.18816E-06       | 0.227145       | 7.35621E-14        |
| rs7101207   | 10 | 96122857 | eQTLcatalogue | BLUEPRINT ge T-cell                   | NOC3L     | G | 3.24912E-06       | 0.109848       | 0.0162456          |
| rs11187906  | 10 | 96124838 | eQTLcatalogue | BLUEPRINT ge T-cell                   | NOC3L     | T | 3.28105E-06       | 0.10976        | 0.0164052          |
| rs11187907  | 10 | 96125361 | eQTLcatalogue | BLUEPRINT ge T-cell                   | NOC3L     | C | 3.28105E-06       | 0.10976        | 0.0164052          |
| rs113544984 | 10 | 96127448 | eQTLcatalogue | BLUEPRINT ge T-cell                   | NOC3L     | C | 3.28105E-06       | 0.10976        | 0.0164052          |
| rs7080472   | 10 | 96012950 | eQTLcatalogue | Quach 2016 ge monocyte Pam3CSK4       | NOC3L     | G | 3.41441E-06       | -0.105905      | 0.017072           |
| rs10786156  | 10 | 96014622 | GTEx/v8       | Brain Nucleus accumbens basal ganglia | NOC3L     | G | 3.46741E-06       | 0.204556       | 0.000164102        |
| rs3891783   | 10 | 96015793 | GTEx/v8       | Brain Nucleus accumbens basal ganglia | NOC3L     | G | 3.46741E-06       | 0.204556       | 0.000164102        |
| rs57866767  | 10 | 96023077 | GTEx/v8       | Brain Nucleus accumbens basal ganglia | NOC3L     | C | 3.46741E-06       | 0.204556       | 0.000164102        |
| rs2274224   | 10 | 96039597 | GTEx/v8       | Brain Nucleus accumbens basal ganglia | NOC3L     | C | 3.46741E-06       | 0.204556       | 0.000164102        |
| rs778275808 | 10 | 96114212 | DICE          | T CD4 TH1                             | PLCE1     | T | 3.54266627324E-06 | 0.944577708395 | 0.049              |
| rs10509672  | 10 | 96115957 | DICE          | T CD4 TH1                             | PLCE1     | C | 3.54266627324E-06 | 0.944577708395 | 0.049              |
| rs74825688  | 10 | 96119687 | DICE          | T CD4 TH1                             | PLCE1     | A | 3.54266627324E-06 | 0.944577708395 | 0.049              |
| rs79193572  | 10 | 96119713 | DICE          | T CD4 TH1                             | PLCE1     | G | 3.54266627324E-06 | 0.944577708395 | 0.049              |
| rs11187906  | 10 | 96124838 | DICE          | T CD4 TH1                             | PLCE1     | A | 3.54266627324E-06 | 0.944577708395 | 0.049              |
| rs11187907  | 10 | 96125361 | DICE          | T CD4 TH1                             | PLCE1     | T | 3.54266627324E-06 | 0.944577708395 | 0.049              |
| rs113544984 | 10 | 96127448 | DICE          | T CD4 TH1                             | PLCE1     | A | 3.54266627324E-06 | 0.944577708395 | 0.049              |
| rs79746649  | 10 | 96120218 | DICE          | T CD4 TH1                             | PLCE1     | T | 3.56488559879E-06 | 0.92935546315  | 0.049              |
| rs7101207   | 10 | 96122857 | DICE          | T CD4 TH1                             | PLCE1     | A | 3.56488559879E-06 | 0.92935546315  | 0.049              |
| rs112252876 | 10 | 96123355 | DICE          | T CD4 TH1                             | PLCE1     | T | 3.56488559879E-06 | 0.92935546315  | 0.049              |
| rs11187826  | 10 | 95988042 | eQTLcatalogue | TwinsUK ge LCL                        | PLCE1     | A | 3.67082E-06       | 0.0676536      | 0.0183541          |
| rs778275808 | 10 | 96114212 | GTEx/v8       | Adipose Visceral Omentum              | PLCE1-AS1 | T | 3.89634E-06       | -0.362682      | 0.000644523        |
| rs10509672  | 10 | 96115957 | GTEx/v8       | Adipose Visceral Omentum              | PLCE1-AS1 | C | 3.89634E-06       | -0.362682      | 0.000644523        |
| rs79193572  | 10 | 96119713 | GTEx/v8       | Adipose Visceral Omentum              | PLCE1-AS1 | G | 3.89634E-06       | -0.362682      | 0.000644523        |
| rs7080472   | 10 | 96012950 | BIOSQTL       | BIOS eQTL geneLevel                   | PLCE1     | T | 3.98429E-06       | 4.6122133      | 0.0028727838883029 |

|             |    |          |               |                                       |              |      |             |           |                    |
|-------------|----|----------|---------------|---------------------------------------|--------------|------|-------------|-----------|--------------------|
| rs3740360   | 10 | 96025491 | eQTLcatalogue | TwinsUK ge LCL                        | PLCE1        | A    | 4.12006E-06 | 0.0676965 | 0.0206003          |
| rs17109875  | 10 | 96026575 | eQTLcatalogue | TwinsUK ge LCL                        | PLCE1        | T    | 4.12006E-06 | 0.0676965 | 0.0206003          |
| rs11187837  | 10 | 96035980 | eQTLcatalogue | TwinsUK ge LCL                        | PLCE1        | T    | 4.23178E-06 | 0.0679173 | 0.0211589          |
| rs11187907  | 10 | 96125361 | GTEX/v8       | Adipose Visceral Omentum              | PLCE1-AS1    | T    | 4.23293E-06 | -0.353893 | 0.000644523        |
| rs11187838  | 10 | 96038686 | GTEX/v8       | Brain Cerebellar Hemisphere           | NOC3L        | A    | 4.63289E-06 | 0.260394  | 1.25929E-05        |
| rs2274224   | 10 | 96039597 | GTEX/v8       | Brain Cerebellar Hemisphere           | NOC3L        | C    | 4.63289E-06 | 0.260394  | 1.25929E-05        |
| rs11187870  | 10 | 96087866 | GTEX/v8       | Adipose Visceral Omentum              | PLCE1-AS1    | C    | 4.63963E-06 | -0.352852 | 0.000644523        |
| rs2274224   | 10 | 96039597 | GTEX/v8       | Thyroid                               | TBC1D12      | C    | 4.82673E-06 | -0.135379 | 1.4449E-10         |
| rs10786156  | 10 | 96014622 | GTEX/v8       | Thyroid                               | TBC1D12      | G    | 5.24533E-06 | -0.134688 | 1.4449E-10         |
| rs3891783   | 10 | 96015793 | GTEX/v8       | Thyroid                               | TBC1D12      | G    | 5.26247E-06 | -0.134964 | 1.4449E-10         |
| rs57866767  | 10 | 96023077 | GTEX/v8       | Thyroid                               | TBC1D12      | C    | 5.26247E-06 | -0.134964 | 1.4449E-10         |
| rs7080472   | 10 | 96012950 | GTEX/v8       | Brain Nucleus accumbens basal ganglia | NOC3L        | T    | 5.39627E-06 | 0.203249  | 0.000164102        |
| rs11187906  | 10 | 96124838 | BIOSQTL       | BIOS eQTL geneLevel                   | HELLS        | A    | 5.58289E-06 | 4.5416722 | 0.0039545499652674 |
| rs11187906  | 10 | 96124838 | BIOSQTL       | BIOS eQTL geneLevel                   | RP11-119K6.6 | A    | 5.58289E-06 | 4.5416722 | 0.0039545499652674 |
| rs3740359   | 10 | 96100119 | GTEX/v8       | Adipose Visceral Omentum              | PLCE1-AS1    | T    | 5.74462E-06 | -0.311868 | 0.000644523        |
| rs11187838  | 10 | 96038686 | GTEX/v8       | Artery Tibial                         | PLCE1-AS1    | A    | 5.76321E-06 | 0.138868  | 2.47435E-06        |
| rs200197176 | 10 | 96055963 | eQTLcatalogue | GENCORD ge T-cell                     | PLCE1        | C    | 5.83724E-06 | 0.342589  | 0.0291862          |
| rs11187826  | 10 | 95988042 | GTEX/v8       | Adipose Visceral Omentum              | PLCE1-AS1    | G    | 5.84747E-06 | -0.330764 | 0.000644523        |
| rs752140    | 10 | 96071396 | GTEX/v8       | Whole Blood                           | TBC1D12      | T    | 5.9535E-06  | 0.239486  | 0.00686763         |
| rs7080472   | 10 | 96012950 | GTEX/v8       | Artery Tibial                         | PLCE1-AS1    | T    | 6.16553E-06 | 0.139554  | 2.47435E-06        |
| rs7078844   | 10 | 96081140 | eQTLcatalogue | BrainSeq ge brain                     | NOC3L        | T    | 6.27308E-06 | 0.0839191 | 0.0313654          |
| rs2274224   | 10 | 96039597 | GTEX/v8       | Adipose Subcutaneous                  | NOC3L        | C    | 6.31202E-06 | 0.114183  | 3.06299E-11        |
| rs10786156  | 10 | 96014622 | GTEX/v8       | Brain Cerebellar Hemisphere           | NOC3L        | G    | 6.40412E-06 | 0.257037  | 1.25929E-05        |
| rs3891783   | 10 | 96015793 | GTEX/v8       | Brain Cerebellar Hemisphere           | NOC3L        | G    | 6.40412E-06 | 0.257037  | 1.25929E-05        |
| rs57866767  | 10 | 96023077 | GTEX/v8       | Brain Cerebellar Hemisphere           | NOC3L        | C    | 6.40412E-06 | 0.257037  | 1.25929E-05        |
| rs10786156  | 10 | 96014622 | GTEX/v8       | Spleen                                | NOC3L        | G    | 6.95933E-06 | 0.238458  | 1.49159E-15        |
| rs3891783   | 10 | 96015793 | GTEX/v8       | Spleen                                | NOC3L        | G    | 6.95933E-06 | 0.238458  | 1.49159E-15        |
| rs57866767  | 10 | 96023077 | GTEX/v8       | Spleen                                | NOC3L        | C    | 6.95933E-06 | 0.238458  | 1.49159E-15        |
| rs2274224   | 10 | 96039597 | GTEX/v8       | Spleen                                | NOC3L        | C    | 6.95933E-06 | 0.238458  | 1.49159E-15        |
| rs11187890  | 10 | 96102758 | eQTLcatalogue | BLUEPRINT ge T-cell                   | NOC3L        | T    | 7.12973E-06 | 0.104697  | 0.0356487          |
| rs11187895  | 10 | 96106240 | eQTLcatalogue | BLUEPRINT ge T-cell                   | NOC3L        | G    | 7.13783E-06 | 0.104684  | 0.0356892          |
| rs11187897  | 10 | 96106603 | eQTLcatalogue | BLUEPRINT ge T-cell                   | NOC3L        | A    | 7.13783E-06 | 0.104684  | 0.0356892          |
| rs10509672  | 10 | 96115957 | eQTLcatalogue | BLUEPRINT ge T-cell                   | NOC3L        | G    | 7.13783E-06 | 0.104684  | 0.0356892          |
| rs74825688  | 10 | 96119687 | eQTLcatalogue | BLUEPRINT ge T-cell                   | NOC3L        | G    | 7.13783E-06 | 0.104684  | 0.0356892          |
| rs79193572  | 10 | 96119713 | eQTLcatalogue | BLUEPRINT ge T-cell                   | NOC3L        | A    | 7.13783E-06 | 0.104684  | 0.0356892          |
| rs778275808 | 10 | 96114212 | eQTLcatalogue | BLUEPRINT ge T-cell                   | NOC3L        | TCTC | 7.15045E-06 | 0.104677  | 0.0357522          |
| rs11187838  | 10 | 96038686 | GTEX/v8       | Spleen                                | NOC3L        | A    | 7.73019E-06 | 0.237346  | 1.49159E-15        |
| rs749295068 | 10 | 96073508 | GTEX/v8       | Whole Blood                           | TBC1D12      | A    | 7.96594E-06 | 0.249853  | 0.00686763         |
| rs10786156  | 10 | 96014622 | GTEX/v8       | Colon Sigmoid                         | NOC3L        | G    | 8.39325E-06 | 0.178254  | 1.73346E-11        |

|             |    |          |               |                                 |              |   |             |            |                    |
|-------------|----|----------|---------------|---------------------------------|--------------|---|-------------|------------|--------------------|
| rs3891783   | 10 | 96015793 | GTEx/v8       | Colon Sigmoid                   | NOC3L        | G | 8.39325E-06 | 0.178254   | 1.73346E-11        |
| rs57866767  | 10 | 96023077 | GTEx/v8       | Colon Sigmoid                   | NOC3L        | C | 8.39325E-06 | 0.178254   | 1.73346E-11        |
| rs7080472   | 10 | 96012950 | GTEx/v8       | Adipose Subcutaneous            | NOC3L        | T | 9.22157E-06 | 0.113545   | 3.06299E-11        |
| rs113544984 | 10 | 96127448 | GTEx/v8       | Adipose Visceral Omentum        | PLCE1-AS1    | A | 9.24866E-06 | -0.349983  | 0.000644523        |
| rs7078844   | 10 | 96081140 | GTEx/v8       | Thyroid                         | PLCE1-AS1    | C | 9.37332E-06 | -0.158645  | 0.00721889         |
| rs11187844  | 10 | 96056629 | eQTLcatalogue | GENCORDge T-cell                | PLCE1        | C | 9.51488E-06 | 0.299103   | 0.0475744          |
| rs2274224   | 10 | 96039597 | eQTLcatalogue | Fairfax 2014 LPS2               | NOC3L        | G | 9.7278E-06  | -0.128461  | 0.048639           |
| rs11187890  | 10 | 96102758 | GTEx/v8       | Thyroid                         | NOC3L        | C | 1.02717E-05 | -0.167326  | 0.00220997         |
| rs10786156  | 10 | 96014622 | GTEx/v8       | Prostate                        | NOC3L        | G | 1.05232E-05 | 0.195047   | 7.10224E-08        |
| rs3891783   | 10 | 96015793 | GTEx/v8       | Prostate                        | NOC3L        | G | 1.05232E-05 | 0.195047   | 7.10224E-08        |
| rs57866767  | 10 | 96023077 | GTEx/v8       | Prostate                        | NOC3L        | C | 1.05232E-05 | 0.195047   | 7.10224E-08        |
| rs3740360   | 10 | 96025491 | eQTLGen       | eQTLGen cis eQTLs               | NOC3L        | C | 1.0598E-05  | 7.8427E+05 | 0.0299060977059313 |
| rs7078844   | 10 | 96081140 | GTEx/v8       | Thyroid                         | PLCE1        | C | 1.07686E-05 | -0.152078  | 1.91428E-05        |
| rs7096883   | 10 | 96069149 | GTEx/v8       | Whole Blood                     | TBC1D12      | A | 1.08788E-05 | 0.237684   | 0.00686763         |
| rs11187838  | 10 | 96038686 | GTEx/v8       | Colon Sigmoid                   | NOC3L        | A | 1.09622E-05 | 0.174007   | 1.73346E-11        |
| rs7100626   | 10 | 96069674 | GTEx/v8       | Whole Blood                     | TBC1D12      | A | 1.12809E-05 | 0.242268   | 0.00686763         |
| rs11187852  | 10 | 96070132 | GTEx/v8       | Whole Blood                     | TBC1D12      | A | 1.12809E-05 | 0.242268   | 0.00686763         |
| rs11187838  | 10 | 96038686 | GTEx/v8       | Skin Not Sun Exposed Suprapubic | RP11-76P2.4  | A | 1.15234E-05 | 0.222711   | 5.98468E-07        |
| rs2274224   | 10 | 96039597 | GTEx/v8       | Colon Sigmoid                   | NOC3L        | C | 1.17053E-05 | 0.173093   | 1.73346E-11        |
| rs7080472   | 10 | 96012950 | GTEx/v8       | Heart Atrial Appendage          | NOC3L        | T | 1.20317E-05 | 0.164229   | 2.17353E-13        |
| rs17109875  | 10 | 96026575 | eQTLGen       | eQTLGen cis eQTLs               | NOC3L        | C | 1.2032E-05  | 6.8346E+05 | 0.0338453327007472 |
| rs10786156  | 10 | 96014622 | GTEx/v8       | Skin Not Sun Exposed Suprapubic | RP11-76P2.4  | G | 1.21338E-05 | 0.219968   | 5.98468E-07        |
| rs3891783   | 10 | 96015793 | GTEx/v8       | Skin Not Sun Exposed Suprapubic | RP11-76P2.4  | G | 1.21338E-05 | 0.219968   | 5.98468E-07        |
| rs57866767  | 10 | 96023077 | GTEx/v8       | Skin Not Sun Exposed Suprapubic | RP11-76P2.4  | C | 1.21338E-05 | 0.219968   | 5.98468E-07        |
| rs10786156  | 10 | 96014622 | GTEx/v8       | Spleen                          | RP11-76P2.4  | G | 1.21461E-05 | 0.37517    | 9.37816E-08        |
| rs3891783   | 10 | 96015793 | GTEx/v8       | Spleen                          | RP11-76P2.4  | G | 1.21461E-05 | 0.37517    | 9.37816E-08        |
| rs57866767  | 10 | 96023077 | GTEx/v8       | Spleen                          | RP11-76P2.4  | C | 1.21461E-05 | 0.37517    | 9.37816E-08        |
| rs2274224   | 10 | 96039597 | GTEx/v8       | Spleen                          | RP11-76P2.4  | C | 1.21461E-05 | 0.37517    | 9.37816E-08        |
| rs11187838  | 10 | 96038686 | GTEx/v8       | Brain Hippocampus               | NOC3L        | A | 1.21767E-05 | 0.237097   | 0.000170124        |
| rs2274224   | 10 | 96039597 | GTEx/v8       | Brain Hippocampus               | NOC3L        | C | 1.21767E-05 | 0.237097   | 0.000170124        |
| rs7101207   | 10 | 96122857 | BIOSQTL       | BIOS eQTL geneLevel             | HELLS        | A | 1.23339E-05 | 4.3716277  | 0.0083205004812319 |
| rs7101207   | 10 | 96122857 | BIOSQTL       | BIOS eQTL geneLevel             | RP11-119K6.6 | A | 1.23339E-05 | 4.3716277  | 0.0083205004812319 |
| rs112252876 | 10 | 96123355 | BIOSQTL       | BIOS eQTL geneLevel             | HELLS        | T | 1.23339E-05 | 4.3716277  | 0.0083205004812319 |
| rs112252876 | 10 | 96123355 | BIOSQTL       | BIOS eQTL geneLevel             | RP11-119K6.6 | T | 1.23339E-05 | 4.3716277  | 0.0083205004812319 |
| rs2274224   | 10 | 96039597 | GTEx/v8       | Prostate                        | NOC3L        | C | 1.26886E-05 | 0.192241   | 7.10224E-08        |
| rs7080472   | 10 | 96012950 | GTEx/v8       | Skin Not Sun Exposed Suprapubic | PLCE1        | T | 1.28165E-05 | 0.13641    | 9.09957E-06        |
| rs11187863  | 10 | 96081457 | GTEx/v8       | Whole Blood                     | TBC1D12      | G | 1.29458E-05 | 0.229961   | 0.00686763         |
| rs11187866  | 10 | 96085991 | GTEx/v8       | Whole Blood                     | TBC1D12      | G | 1.29458E-05 | 0.229961   | 0.00686763         |
| rs11187883  | 10 | 96096866 | GTEx/v8       | Whole Blood                     | TBC1D12      | C | 1.29458E-05 | 0.229961   | 0.00686763         |

|             |    |          |         |                                  |                 |    |                   |                |                    |
|-------------|----|----------|---------|----------------------------------|-----------------|----|-------------------|----------------|--------------------|
| rs7096883   | 10 | 96069149 | DICE    | T CD4 TH1                        | PLCE1           | A  | 1.33719940329E-05 | 0.827716391619 | 0.049              |
| rs7100626   | 10 | 96069674 | DICE    | T CD4 TH1                        | PLCE1           | A  | 1.33719940329E-05 | 0.827716391619 | 0.049              |
| rs11187852  | 10 | 96070132 | DICE    | T CD4 TH1                        | PLCE1           | A  | 1.33719940329E-05 | 0.827716391619 | 0.049              |
| rs752140    | 10 | 96071396 | DICE    | T CD4 TH1                        | PLCE1           | T  | 1.33719940329E-05 | 0.827716391619 | 0.049              |
| rs11187864  | 10 | 96082506 | DICE    | T CD4 TH1<br>17                  | PLCE1           | T  | 1.35358306881E-05 | 0.825812915876 | 0.049              |
| rs11187870  | 10 | 96087866 | DICE    | T CD4 TH1<br>17                  | PLCE1           | C  | 1.35358306881E-05 | 0.825812915876 | 0.049              |
| rs145707916 | 10 | 96092992 | DICE    | T CD4 TH1<br>17                  | PLCE1           | GA | 1.35358306881E-05 | 0.825812915876 | 0.049              |
| rs750148755 | 10 | 96095271 | DICE    | T CD4 TH1<br>17                  | PLCE1           | C  | 1.35358306881E-05 | 0.825812915876 | 0.049              |
| rs11187882  | 10 | 96095861 | DICE    | T CD4 TH1<br>17                  | PLCE1           | C  | 1.35358306881E-05 | 0.825812915876 | 0.049              |
| rs11187895  | 10 | 96106240 | DICE    | T CD4 TH1<br>17                  | PLCE1           | C  | 1.35358306881E-05 | 0.825812915876 | 0.049              |
| rs11187897  | 10 | 96106603 | DICE    | T CD4 TH1<br>17                  | PLCE1           | G  | 1.35358306881E-05 | 0.825812915876 | 0.049              |
| rs7080472   | 10 | 96012950 | GTEX/v8 | Skin Sun<br>Exposed<br>Lower leg | RP11-<br>76P2.4 | T  | 1.35417E-05       | 0.210063       | 1.123E-06          |
| rs3740360   | 10 | 96025491 | GTEX/v8 | Adipose<br>Visceral<br>Omentum   | PLCE1-<br>AS1   | C  | 1.36375E-05       | -0.307083      | 0.000644523        |
| rs17109875  | 10 | 96026575 | GTEX/v8 | Adipose<br>Visceral<br>Omentum   | PLCE1-<br>AS1   | C  | 1.36375E-05       | -0.307083      | 0.000644523        |
| rs11187837  | 10 | 96035980 | GTEX/v8 | Adipose<br>Visceral<br>Omentum   | PLCE1-<br>AS1   | C  | 1.36375E-05       | -0.307083      | 0.000644523        |
| rs3891783   | 10 | 96015793 | GTEX/v8 | Artery Tibial                    | PLCE1-<br>AS1   | G  | 1.3673E-05        | 0.133394       | 2.47435E-06        |
| rs57866767  | 10 | 96023077 | GTEX/v8 | Artery Tibial                    | PLCE1-<br>AS1   | C  | 1.3673E-05        | 0.133394       | 2.47435E-06        |
| rs11187845  | 10 | 96060198 | DICE    | T CD4 TH1                        | PLCE1           | A  | 1.38155069706E-05 | 0.838348523246 | 0.049              |
| rs34309017  | 10 | 96061619 | DICE    | T CD4 TH1                        | PLCE1           | A  | 1.38155069706E-05 | 0.838348523246 | 0.049              |
| rs12217792  | 10 | 96062386 | DICE    | T CD4 TH1                        | PLCE1           | C  | 1.38155069706E-05 | 0.838348523246 | 0.049              |
| rs11187847  | 10 | 96063440 | DICE    | T CD4 TH1                        | PLCE1           | G  | 1.38155069706E-05 | 0.838348523246 | 0.049              |
| rs75409190  | 10 | 96072425 | DICE    | T CD4 TH1                        | PLCE1           | T  | 1.38155069706E-05 | 0.838348523246 | 0.049              |
| rs771106747 | 10 | 96072873 | DICE    | T CD4 TH1                        | PLCE1           | C  | 1.38155069706E-05 | 0.838348523246 | 0.049              |
| rs749295068 | 10 | 96073508 | DICE    | T CD4 TH1                        | PLCE1           | A  | 1.38155069706E-05 | 0.838348523246 | 0.049              |
| rs11187856  | 10 | 96076869 | DICE    | T CD4 TH1                        | PLCE1           | A  | 1.38155069706E-05 | 0.838348523246 | 0.049              |
| rs11187837  | 10 | 96035980 | eQTLGen | eQTLGen<br>cis eQTLs             | NOC3L           | C  | 1.4029E-05        | 5,6111E+05     | 0.0391420118343195 |
| rs11187838  | 10 | 96038686 | GTEX/v8 | Thyroid                          | TBC1D12         | A  | 1.41454E-05       | -0.12905       | 1.4449E-10         |
| rs10786156  | 10 | 96014622 | GTEX/v8 | Brain<br>Hippocampus             | NOC3L           | G  | 1.45003E-05       | 0.237209       | 0.000170124        |
| rs3891783   | 10 | 96015793 | GTEX/v8 | Brain<br>Hippocampus             | NOC3L           | G  | 1.45003E-05       | 0.237209       | 0.000170124        |
| rs57866767  | 10 | 96023077 | GTEX/v8 | Brain<br>Hippocampus             | NOC3L           | C  | 1.45003E-05       | 0.237209       | 0.000170124        |
| rs34309017  | 10 | 96061619 | GTEX/v8 | Whole Blood                      | TBC1D12         | A  | 1.51594E-05       | 0.2357         | 0.00686763         |
| rs12217792  | 10 | 96062386 | GTEX/v8 | Whole Blood                      | TBC1D12         | C  | 1.51594E-05       | 0.2357         | 0.00686763         |
| rs11187838  | 10 | 96038686 | GTEX/v8 | Heart Atrial<br>Appendage        | NOC3L           | A  | 1.52536E-05       | 0.162842       | 2.17353E-13        |
| rs75409190  | 10 | 96072425 | GTEX/v8 | Whole Blood                      | TBC1D12         | T  | 1.57792E-05       | 0.240261       | 0.00686763         |
| rs771106747 | 10 | 96072873 | GTEX/v8 | Whole Blood                      | TBC1D12         | C  | 1.57792E-05       | 0.240261       | 0.00686763         |
| rs11187856  | 10 | 96076869 | GTEX/v8 | Whole Blood                      | TBC1D12         | A  | 1.57792E-05       | 0.240261       | 0.00686763         |
| rs2274224   | 10 | 96039597 | GTEX/v8 | Skin Sun<br>Exposed<br>Lower leg | RP11-<br>76P2.4 | C  | 1.60059E-05       | 0.205582       | 1.123E-06          |
| rs10786156  | 10 | 96014622 | GTEX/v8 | Artery Tibial                    | PLCE1-<br>AS1   | G  | 1.67528E-05       | 0.132008       | 2.47435E-06        |
| rs10786156  | 10 | 96014622 | GTEX/v8 | Heart Atrial<br>Appendage        | NOC3L           | G  | 1.7044E-05        | 0.160855       | 2.17353E-13        |
| rs3891783   | 10 | 96015793 | GTEX/v8 | Heart Atrial<br>Appendage        | NOC3L           | G  | 1.7044E-05        | 0.160855       | 2.17353E-13        |

|             |    |          |         |                                 |             |   |                   |                |                    |
|-------------|----|----------|---------|---------------------------------|-------------|---|-------------------|----------------|--------------------|
| rs57866767  | 10 | 96023077 | GTEX/v8 | Heart Atrial Appendage          | NOC3L       | C | 1.7044E-05        | 0.160855       | 2.17353E-13        |
| rs778275808 | 10 | 96114212 | DICE    | T CD4 TH1 17                    | PLCE1       | T | 1.74378734524E-05 | 0.871571813104 | 0.049              |
| rs10509672  | 10 | 96115957 | DICE    | T CD4 TH1 17                    | PLCE1       | C | 1.74378734524E-05 | 0.871571813104 | 0.049              |
| rs74825688  | 10 | 96119687 | DICE    | T CD4 TH1 17                    | PLCE1       | A | 1.74378734524E-05 | 0.871571813104 | 0.049              |
| rs79193572  | 10 | 96119713 | DICE    | T CD4 TH1 17                    | PLCE1       | G | 1.74378734524E-05 | 0.871571813104 | 0.049              |
| rs11187906  | 10 | 96124838 | DICE    | T CD4 TH1 17                    | PLCE1       | A | 1.74378734524E-05 | 0.871571813104 | 0.049              |
| rs11187907  | 10 | 96125361 | DICE    | T CD4 TH1 17                    | PLCE1       | T | 1.74378734524E-05 | 0.871571813104 | 0.049              |
| rs113544984 | 10 | 96127448 | DICE    | T CD4 TH1 17                    | PLCE1       | A | 1.74378734524E-05 | 0.871571813104 | 0.049              |
| rs11187838  | 10 | 96038686 | GTEX/v8 | Adipose Subcutaneous            | NOC3L       | A | 1.74632E-05       | 0.109597       | 3.06299E-11        |
| rs11187877  | 10 | 96092121 | GTEX/v8 | Thyroid                         | NOC3L       | A | 1.74843E-05       | -0.162551      | 0.00220997         |
| rs7080472   | 10 | 96012950 | GTEX/v8 | Spleen                          | NOC3L       | T | 1.75545E-05       | 0.224477       | 1.49159E-15        |
| rs11187882  | 10 | 96095861 | GTEX/v8 | Whole Blood                     | TBC1D12     | C | 1.77453E-05       | 0.239411       | 0.00686763         |
| rs11187844  | 10 | 96056629 | eQTLGen | eQTLGen cis eQTLs               | PDLIM1      | A | 1.7948E-05        | -4.2889        | 0.0491932634554234 |
| rs7100626   | 10 | 96069674 | GTEX/v8 | Thyroid                         | NOC3L       | A | 1.81872E-05       | -0.162883      | 0.00220997         |
| rs11187852  | 10 | 96070132 | GTEX/v8 | Thyroid                         | NOC3L       | A | 1.81872E-05       | -0.162883      | 0.00220997         |
| rs753724    | 10 | 96051417 | GTEX/v8 | Muscle Skeletal                 | NOC3L       | T | 1.82552E-05       | 0.20526        | 7.35621E-14        |
| rs11187842  | 10 | 96052511 | GTEX/v8 | Muscle Skeletal                 | NOC3L       | T | 1.82552E-05       | 0.20526        | 7.35621E-14        |
| rs3781266   | 10 | 96052747 | GTEX/v8 | Muscle Skeletal                 | NOC3L       | G | 1.82552E-05       | 0.20526        | 7.35621E-14        |
| rs3740365   | 10 | 96053239 | GTEX/v8 | Muscle Skeletal                 | NOC3L       | A | 1.82552E-05       | 0.20526        | 7.35621E-14        |
| rs12220091  | 10 | 96053689 | GTEX/v8 | Muscle Skeletal                 | NOC3L       | T | 1.82552E-05       | 0.20526        | 7.35621E-14        |
| rs3891783   | 10 | 96015793 | GTEX/v8 | Skin Sun Exposed Lower leg      | RP11-76P2.4 | G | 1.96428E-05       | 0.204197       | 1.123E-06          |
| rs57866767  | 10 | 96023077 | GTEX/v8 | Skin Sun Exposed Lower leg      | RP11-76P2.4 | C | 1.96428E-05       | 0.204197       | 1.123E-06          |
| rs7080472   | 10 | 96012950 | GTEX/v8 | Prostate                        | NOC3L       | T | 1.9685E-05        | 0.188107       | 7.10224E-08        |
| rs11187838  | 10 | 96038686 | GTEX/v8 | Artery Tibial                   | PLCE1       | A | 2.06124E-05       | 0.106027       | 1.21915E-07        |
| rs2274224   | 10 | 96039597 | GTEX/v8 | Skin Not Sun Exposed Suprapubic | RP11-76P2.4 | C | 2.0648E-05        | 0.214          | 5.98468E-07        |
| rs11187845  | 10 | 96060198 | GTEX/v8 | Whole Blood                     | TBC1D12     | A | 2.10554E-05       | 0.225987       | 0.00686763         |
| rs11187847  | 10 | 96063440 | GTEX/v8 | Whole Blood                     | TBC1D12     | G | 2.10554E-05       | 0.225987       | 0.00686763         |
| rs10786156  | 10 | 96014622 | GTEX/v8 | Adipose Subcutaneous            | NOC3L       | G | 2.14308E-05       | 0.107454       | 3.06299E-11        |
| rs11187895  | 10 | 96106240 | GTEX/v8 | Thyroid                         | NOC3L       | C | 2.14366E-05       | -0.162118      | 0.00220997         |
| rs11187897  | 10 | 96106603 | GTEX/v8 | Thyroid                         | NOC3L       | G | 2.14366E-05       | -0.162118      | 0.00220997         |
| rs3891783   | 10 | 96015793 | GTEX/v8 | Adipose Subcutaneous            | NOC3L       | G | 2.14918E-05       | 0.107701       | 3.06299E-11        |
| rs57866767  | 10 | 96023077 | GTEX/v8 | Adipose Subcutaneous            | NOC3L       | C | 2.14918E-05       | 0.107701       | 3.06299E-11        |
| rs10786156  | 10 | 96014622 | GTEX/v8 | Skin Sun Exposed Lower leg      | RP11-76P2.4 | G | 2.15253E-05       | 0.203092       | 1.123E-06          |
| rs2274224   | 10 | 96039597 | GTEX/v8 | Artery Tibial                   | PLCE1-AS1   | C | 2.18917E-05       | 0.13008        | 2.47435E-06        |
| rs7096883   | 10 | 96069149 | GTEX/v8 | Thyroid                         | NOC3L       | A | 2.23774E-05       | -0.157473      | 0.00220997         |
| rs11187840  | 10 | 96050351 | GTEX/v8 | Muscle Skeletal                 | NOC3L       | G | 2.264E-05         | 0.204891       | 7.35621E-14        |
| rs75017201  | 10 | 96055152 | GTEX/v8 | Muscle Skeletal                 | NOC3L       | T | 2.264E-05         | 0.204891       | 7.35621E-14        |
| rs7080472   | 10 | 96012950 | GTEX/v8 | Nerve Tibial                    | PLCE1       | T | 2.35053E-05       | 0.140728       | 1.91043E-25        |
| rs7080472   | 10 | 96012950 | GTEX/v8 | Colon Transverse                | RP11-76P2.4 | T | 2.41297E-05       | 0.26705        | 2.2326E-06         |
| rs7080472   | 10 | 96012950 | GTEX/v8 | Skin Not Sun Exposed Suprapubic | RP11-76P2.4 | T | 2.42629E-05       | 0.214514       | 5.98468E-07        |



|                       |    |          |          |                                 |              |    |                   |                |                    |
|-----------------------|----|----------|----------|---------------------------------|--------------|----|-------------------|----------------|--------------------|
| rs11187877            | 10 | 96092121 | GTEEx/v8 | Whole Blood                     | TBC1D12      | A  | 2.46351E-05       | 0.232016       | 0.00686763         |
| rs11187838            | 10 | 96038686 | GTEEx/v8 | Muscle Skeletal                 | NOC3L        | A  | 2.53713E-05       | 0.114667       | 7.35621E-14        |
| rs11187907            | 10 | 96125361 | BIOSQTL  | BIOS eQTL geneLevel             | HELLS        | T  | 2.59241E-05       | 4.2066091      | 0.0160794899241402 |
| rs11187907            | 10 | 96125361 | BIOSQTL  | BIOS eQTL geneLevel             | RP11-119K6.6 | T  | 2.59241E-05       | 4.2066091      | 0.0160794899241402 |
| rs113544984           | 10 | 96127448 | BIOSQTL  | BIOS eQTL geneLevel             | HELLS        | A  | 2.67387E-05       | 4.1997961      | 0.0165349572331722 |
| rs113544984           | 10 | 96127448 | BIOSQTL  | BIOS eQTL geneLevel             | RP11-119K6.6 | A  | 2.67387E-05       | 4.1997961      | 0.0165349572331722 |
| rs10786156            | 10 | 96014622 | GTEEx/v8 | Brain Cerebellar Hemisphere     | PLCE1        | G  | 2.68601E-05       | 0.243306       | 0.0391634          |
| rs3891783             | 10 | 96015793 | GTEEx/v8 | Brain Cerebellar Hemisphere     | PLCE1        | G  | 2.68601E-05       | 0.243306       | 0.0391634          |
| rs57866767            | 10 | 96023077 | GTEEx/v8 | Brain Cerebellar Hemisphere     | PLCE1        | C  | 2.68601E-05       | 0.243306       | 0.0391634          |
| rs11187838            | 10 | 96038686 | GTEEx/v8 | Skin Not Sun Exposed Suprapubic | PLCE1        | A  | 2.70779E-05       | 0.131307       | 9.09957E-06        |
| rs10786156            | 10 | 96014622 | GTEEx/v8 | Skin Not Sun Exposed Suprapubic | PLCE1        | G  | 2.85818E-05       | 0.129644       | 9.09957E-06        |
| rs3891783             | 10 | 96015793 | GTEEx/v8 | Skin Not Sun Exposed Suprapubic | PLCE1        | G  | 2.85818E-05       | 0.129644       | 9.09957E-06        |
| rs57866767            | 10 | 96023077 | GTEEx/v8 | Skin Not Sun Exposed Suprapubic | PLCE1        | C  | 2.85818E-05       | 0.129644       | 9.09957E-06        |
| rs7080472             | 10 | 96012950 | GTEEx/v8 | Muscle Skeletal                 | NOC3L        | T  | 2.88251E-05       | 0.114279       | 7.35621E-14        |
| rs11187864            | 10 | 96082506 | GTEEx/v8 | Whole Blood                     | TBC1D12      | T  | 2.9558E-05        | 0.230494       | 0.00686763         |
| rs145707916           | 10 | 96092992 | GTEEx/v8 | Whole Blood                     | TBC1D12      | GA | 2.9558E-05        | 0.230494       | 0.00686763         |
| rs750148755           | 10 | 96095271 | GTEEx/v8 | Whole Blood                     | TBC1D12      | C  | 2.9558E-05        | 0.230494       | 0.00686763         |
| rs11187838            | 10 | 96038686 | GTEEx/v8 | Brain Cerebellar Hemisphere     | PLCE1        | A  | 3.05367E-05       | 0.241508       | 0.0391634          |
| rs2274224             | 10 | 96039597 | GTEEx/v8 | Brain Cerebellar Hemisphere     | PLCE1        | C  | 3.05367E-05       | 0.241508       | 0.0391634          |
| rs2274224             | 10 | 96039597 | GTEEx/v8 | Heart Atrial Appendage          | NOC3L        | C  | 3.21677E-05       | 0.156215       | 2.17353E-13        |
| rs2274224             | 10 | 96039597 | GTEEx/v8 | Muscle Skeletal                 | NOC3L        | C  | 3.2592E-05        | 0.112813       | 7.35621E-14        |
| rs11187870            | 10 | 96087866 | GTEEx/v8 | Thyroid                         | NOC3L        | C  | 3.43653E-05       | -0.158631      | 0.00220997         |
| rs11187864            | 10 | 96082506 | GTEEx/v8 | Thyroid                         | NOC3L        | T  | 3.55691E-05       | -0.157449      | 0.00220997         |
| rs145707916           | 10 | 96092992 | GTEEx/v8 | Thyroid                         | NOC3L        | GA | 3.55691E-05       | -0.157449      | 0.00220997         |
| rs750148755           | 10 | 96095271 | GTEEx/v8 | Thyroid                         | NOC3L        | C  | 3.55691E-05       | -0.157449      | 0.00220997         |
| rs11187882            | 10 | 96095861 | GTEEx/v8 | Thyroid                         | NOC3L        | C  | 3.55691E-05       | -0.157449      | 0.00220997         |
| rs2077218             | 10 | 96071561 | BIOSQTL  | BIOS eQTL geneLevel             | NOC3L        | G  | 3.60874E-05       | -4.13111       | 0.0217668071075289 |
| rs3891783             | 10 | 96015793 | GTEEx/v8 | Muscle Skeletal                 | NOC3L        | G  | 3.63252E-05       | 0.112317       | 7.35621E-14        |
| rs57866767            | 10 | 96023077 | GTEEx/v8 | Muscle Skeletal                 | NOC3L        | C  | 3.63252E-05       | 0.112317       | 7.35621E-14        |
| rs75409190            | 10 | 96072425 | GTEEx/v8 | Thyroid                         | NOC3L        | T  | 3.71677E-05       | -0.157685      | 0.00220997         |
| rs771106747           | 10 | 96072873 | GTEEx/v8 | Thyroid                         | NOC3L        | C  | 3.71677E-05       | -0.157685      | 0.00220997         |
| rs749295068           | 10 | 96073508 | GTEEx/v8 | Thyroid                         | NOC3L        | A  | 3.71677E-05       | -0.157685      | 0.00220997         |
| rs11187856            | 10 | 96076869 | GTEEx/v8 | Thyroid                         | NOC3L        | A  | 3.71677E-05       | -0.157685      | 0.00220997         |
| rs3740359             | 10 | 96100119 | GTEEx/v8 | Whole Blood                     | TBC1D12      | T  | 3.72385E-05       | 0.207278       | 0.00686763         |
| rs10786156            | 10 | 96014622 | GTEEx/v8 | Muscle Skeletal                 | NOC3L        | G  | 3.72999E-05       | 0.112118       | 7.35621E-14        |
| rs7080472             | 10 | 96012950 | GTEEx/v8 | Brain Hippocampus               | NOC3L        | T  | 3.88052E-05       | 0.225972       | 0.000170124        |
| 10:96112261_AAAAAAC_A | 10 | 96112261 | DICE     | T CD4 TH1 17                    | PLCE1        | A  | 4.05134739452E-05 | 0.825353456446 | 0.049              |
| rs10786156            | 10 | 96014622 | GTEEx/v8 | Nerve Tibial                    | PLCE1        | G  | 4.08489E-05       | 0.136054       | 1.91043E-25        |
| rs769015184           | 10 | 96049708 | DICE     | T CD4 TH1                       | PLCE1        | A  | 4.16589029341E-05 | 0.760076218492 | 0.049              |

|             |    |          |             |                                 |             |   |                   |                |                    |
|-------------|----|----------|-------------|---------------------------------|-------------|---|-------------------|----------------|--------------------|
| rs11187840  | 10 | 96050351 | DICE        | T CD4 TH1                       | PLCE1       | G | 4.16589029341E-05 | 0.760076218492 | 0.049              |
| rs753724    | 10 | 96051417 | DICE        | T CD4 TH1                       | PLCE1       | T | 4.16589029341E-05 | 0.760076218492 | 0.049              |
| rs11187842  | 10 | 96052511 | DICE        | T CD4 TH1                       | PLCE1       | T | 4.16589029341E-05 | 0.760076218492 | 0.049              |
| rs3781266   | 10 | 96052747 | DICE        | T CD4 TH1                       | PLCE1       | G | 4.16589029341E-05 | 0.760076218492 | 0.049              |
| rs3740365   | 10 | 96053239 | DICE        | T CD4 TH1                       | PLCE1       | A | 4.16589029341E-05 | 0.760076218492 | 0.049              |
| rs12220091  | 10 | 96053689 | DICE        | T CD4 TH1                       | PLCE1       | T | 4.16589029341E-05 | 0.760076218492 | 0.049              |
| rs2274224   | 10 | 96039597 | GTEXv8      | Skin Not Sun Exposed Suprapubic | PLCE1       | C | 4.22949E-05       | 0.1268         | 9.09957E-06        |
| rs7080472   | 10 | 96012950 | GTEXv8      | Spleen                          | RP11-76P2.4 | T | 4.24579E-05       | 0.346219       | 9.37816E-08        |
| rs7080472   | 10 | 96012950 | GTEXv8      | Brain Cerebellar Hemisphere     | PLCE1       | T | 4.31362E-05       | 0.242741       | 0.0391634          |
| rs7078844   | 10 | 96081140 | GTEXv8      | Brain Cerebellum                | HELLS       | C | 4.34404E-05       | -0.28832       | 1.07902E-06        |
| rs11187907  | 10 | 96125361 | BIOSQTL     | BIOS eQTL geneLevel             | NOC3L       | T | 4.38874E-05       | 4.0861408      | 0.0259650235592606 |
| rs113544984 | 10 | 96127448 | BIOSQTL     | BIOS eQTL geneLevel             | NOC3L       | A | 4.38874E-05       | 4.0861408      | 0.0259650235592606 |
| rs3740360   | 10 | 96025491 | DICE        | T CD4 TH1                       | PLCE1       | C | 4.42723585059E-05 | 0.755815010248 | 0.049              |
| rs17109875  | 10 | 96026575 | DICE        | T CD4 TH1                       | PLCE1       | C | 4.42723585059E-05 | 0.755815010248 | 0.049              |
| rs11187837  | 10 | 96035980 | DICE        | T CD4 TH1                       | PLCE1       | C | 4.42723585059E-05 | 0.755815010248 | 0.049              |
| rs34309017  | 10 | 96061619 | GTEXv8      | Thyroid                         | NOC3L       | A | 4.48906E-05       | -0.152426      | 0.00220997         |
| rs12217792  | 10 | 96062386 | GTEXv8      | Thyroid                         | NOC3L       | C | 4.48906E-05       | -0.152426      | 0.00220997         |
| rs11187826  | 10 | 95988042 | PsychENCODE | PsychENCODE eQTLs               | NOC3L       | G | 4.65866E-05       | 0.0668799      | 0.0043080936142294 |
| rs75017201  | 10 | 96055152 | DICE        | T CD4 TH1                       | PLCE1       | T | 4.7192585625E-05  | 0.749469540464 | 0.049              |
| rs11187840  | 10 | 96050351 | GTEXv8      | Whole Blood                     | TBC1D12     | G | 4.78334E-05       | 0.218164       | 0.00686763         |
| rs75017201  | 10 | 96055152 | GTEXv8      | Whole Blood                     | TBC1D12     | T | 4.78334E-05       | 0.218164       | 0.00686763         |
| rs11187863  | 10 | 96081457 | DICE        | T CD4 TH1 17                    | PLCE1       | G | 4.90263652512E-05 | 0.764200029398 | 0.049              |
| rs11187866  | 10 | 96085991 | DICE        | T CD4 TH1 17                    | PLCE1       | G | 4.90263652512E-05 | 0.764200029398 | 0.049              |
| rs11187877  | 10 | 96092121 | DICE        | T CD4 TH1 17                    | PLCE1       | A | 4.90263652512E-05 | 0.764200029398 | 0.049              |
| rs11187883  | 10 | 96096866 | DICE        | T CD4 TH1 17                    | PLCE1       | C | 4.90263652512E-05 | 0.764200029398 | 0.049              |
| rs11187890  | 10 | 96102758 | DICE        | T CD4 TH1 17                    | PLCE1       | C | 4.90263652512E-05 | 0.764200029398 | 0.049              |
| rs3891783   | 10 | 96015793 | GTEXv8      | Nerve Tibial                    | PLCE1       | G | 5.14442E-05       | 0.134396       | 1.91043E-25        |
| rs57866767  | 10 | 96023077 | GTEXv8      | Nerve Tibial                    | PLCE1       | C | 5.14442E-05       | 0.134396       | 1.91043E-25        |
| rs778275808 | 10 | 96114212 | DICE        | T CD4 naive TREG                | PLCE1       | T | 5.26981619237E-05 | 0.803940206822 | 0.049              |
| rs10509672  | 10 | 96115957 | DICE        | T CD4 naive TREG                | PLCE1       | C | 5.26981619237E-05 | 0.803940206822 | 0.049              |
| rs74825688  | 10 | 96119687 | DICE        | T CD4 naive TREG                | PLCE1       | A | 5.26981619237E-05 | 0.803940206822 | 0.049              |
| rs79193572  | 10 | 96119713 | DICE        | T CD4 naive TREG                | PLCE1       | G | 5.26981619237E-05 | 0.803940206822 | 0.049              |
| rs11187906  | 10 | 96124838 | DICE        | T CD4 naive TREG                | PLCE1       | A | 5.26981619237E-05 | 0.803940206822 | 0.049              |
| rs11187907  | 10 | 96125361 | DICE        | T CD4 naive TREG                | PLCE1       | T | 5.26981619237E-05 | 0.803940206822 | 0.049              |
| rs113544984 | 10 | 96127448 | DICE        | T CD4 naive TREG                | PLCE1       | A | 5.26981619237E-05 | 0.803940206822 | 0.049              |
| rs3891783   | 10 | 96015793 | GTEXv8      | Nerve Tibial                    | RP11-76P2.4 | G | 5.28035E-05       | 0.188273       | 5.10248E-05        |
| rs57866767  | 10 | 96023077 | GTEXv8      | Nerve Tibial                    | RP11-76P2.4 | C | 5.28035E-05       | 0.188273       | 5.10248E-05        |
| rs7101207   | 10 | 96122857 | BIOSQTL     | BIOS eQTL geneLevel             | NOC3L       | A | 5.52101E-05       | 4.0325847      | 0.0318882681564246 |
| rs778275808 | 10 | 96114212 | GTEXv8      | Colon Transverse                | CYP2C19     | T | 5.57377E-05       | 0.212138       | 0.023149           |
| rs10509672  | 10 | 96115957 | GTEXv8      | Colon Transverse                | CYP2C19     | C | 5.57377E-05       | 0.212138       | 0.023149           |
| rs74825688  | 10 | 96119687 | GTEXv8      | Colon Transverse                | CYP2C19     | A | 5.57377E-05       | 0.212138       | 0.023149           |
| rs79193572  | 10 | 96119713 | GTEXv8      | Colon Transverse                | CYP2C19     | G | 5.57377E-05       | 0.212138       | 0.023149           |

|             |    |          |          |                             |             |   |                   |                |                    |
|-------------|----|----------|----------|-----------------------------|-------------|---|-------------------|----------------|--------------------|
| rs113544984 | 10 | 96127448 | GTEEx/v8 | Colon Transverse            | CYP2C19     | A | 5.57377E-05       | 0.212138       | 0.023149           |
| rs79746649  | 10 | 96120218 | GTEEx/v8 | Colon Transverse            | CYP2C19     | T | 5.59505E-05       | 0.209954       | 0.023149           |
| rs7101207   | 10 | 96122857 | GTEEx/v8 | Colon Transverse            | CYP2C19     | A | 5.59505E-05       | 0.209954       | 0.023149           |
| rs112252876 | 10 | 96123355 | GTEEx/v8 | Colon Transverse            | CYP2C19     | T | 5.59505E-05       | 0.209954       | 0.023149           |
| rs3740359   | 10 | 96100119 | GTEEx/v8 | Thyroid                     | NOC3L       | T | 5.65973E-05       | -0.141322      | 0.00220997         |
| rs11187845  | 10 | 96060198 | DICE     | T CD4 TH1 17                | PLCE1       | A | 5.72412574339E-05 | 0.773056370538 | 0.049              |
| rs34309017  | 10 | 96061619 | DICE     | T CD4 TH1 17                | PLCE1       | A | 5.72412574339E-05 | 0.773056370538 | 0.049              |
| rs12217792  | 10 | 96062386 | DICE     | T CD4 TH1 17                | PLCE1       | C | 5.72412574339E-05 | 0.773056370538 | 0.049              |
| rs11187847  | 10 | 96063440 | DICE     | T CD4 TH1 17                | PLCE1       | G | 5.72412574339E-05 | 0.773056370538 | 0.049              |
| rs75409190  | 10 | 96072425 | DICE     | T CD4 TH1 17                | PLCE1       | T | 5.72412574339E-05 | 0.773056370538 | 0.049              |
| rs771106747 | 10 | 96072873 | DICE     | T CD4 TH1 17                | PLCE1       | C | 5.72412574339E-05 | 0.773056370538 | 0.049              |
| rs749295068 | 10 | 96073508 | DICE     | T CD4 TH1 17                | PLCE1       | A | 5.72412574339E-05 | 0.773056370538 | 0.049              |
| rs11187856  | 10 | 96076869 | DICE     | T CD4 TH1 17                | PLCE1       | A | 5.72412574339E-05 | 0.773056370538 | 0.049              |
| rs7078844   | 10 | 96081140 | GTEEx/v8 | Brain Cerebellar Hemisphere | HELLS       | C | 5.74834E-05       | -0.278659      | 8.15147E-08        |
| rs112252876 | 10 | 96123355 | BIOSQTL  | BIOS eQTL geneLevel         | NOC3L       | T | 5.86444E-05       | 4.0183398      | 0.0336986057285402 |
| rs3740360   | 10 | 96025491 | GTEEx/v8 | Thyroid                     | NOC3L       | C | 5.9122E-05        | -0.136651      | 0.00220997         |
| rs17109875  | 10 | 96026575 | GTEEx/v8 | Thyroid                     | NOC3L       | C | 5.9122E-05        | -0.136651      | 0.00220997         |
| rs7101207   | 10 | 96122857 | GTEEx/v8 | Adipose Visceral Omentum    | NOC3L       | A | 5.96319E-05       | 0.160985       | 0.000238073        |
| rs112252876 | 10 | 96123355 | GTEEx/v8 | Adipose Visceral Omentum    | NOC3L       | T | 5.96319E-05       | 0.160985       | 0.000238073        |
| rs753724    | 10 | 96051417 | GTEEx/v8 | Whole Blood                 | TBC1D12     | T | 6.22965E-05       | 0.209754       | 0.00686763         |
| rs11187842  | 10 | 96052511 | GTEEx/v8 | Whole Blood                 | TBC1D12     | T | 6.22965E-05       | 0.209754       | 0.00686763         |
| rs3781266   | 10 | 96052747 | GTEEx/v8 | Whole Blood                 | TBC1D12     | G | 6.22965E-05       | 0.209754       | 0.00686763         |
| rs3740365   | 10 | 96053239 | GTEEx/v8 | Whole Blood                 | TBC1D12     | A | 6.22965E-05       | 0.209754       | 0.00686763         |
| rs12220091  | 10 | 96053689 | GTEEx/v8 | Whole Blood                 | TBC1D12     | T | 6.22965E-05       | 0.209754       | 0.00686763         |
| rs11187845  | 10 | 96060198 | GTEEx/v8 | Thyroid                     | NOC3L       | A | 6.31024E-05       | -0.147662      | 0.00220997         |
| rs11187847  | 10 | 96063440 | GTEEx/v8 | Thyroid                     | NOC3L       | G | 6.31024E-05       | -0.147662      | 0.00220997         |
| rs11187838  | 10 | 96038686 | GTEEx/v8 | Spleen                      | RP11-76P2.4 | A | 6.34948E-05       | 0.344413       | 9.37816E-08        |
| rs7080472   | 10 | 96012950 | GTEEx/v8 | Artery Tibial               | NOC3L       | T | 6.38049E-05       | 0.099248       | 1.31505E-07        |
| rs11187890  | 10 | 96102758 | GTEEx/v8 | Whole Blood                 | TBC1D12     | C | 6.51491E-05       | 0.222292       | 0.00686763         |
| rs79746649  | 10 | 96120218 | DICE     | T CD4 TH1 17                | PLCE1       | T | 6.7940652152E-05  | 0.800331492037 | 0.049              |
| rs7101207   | 10 | 96122857 | DICE     | T CD4 TH1 17                | PLCE1       | A | 6.7940652152E-05  | 0.800331492037 | 0.049              |
| rs112252876 | 10 | 96123355 | DICE     | T CD4 TH1 17                | PLCE1       | T | 6.7940652152E-05  | 0.800331492037 | 0.049              |
| rs2274224   | 10 | 96039597 | GTEEx/v8 | Artery Tibial               | RP11-76P2.4 | C | 6.81555E-05       | 0.188221       | 5.41051E-05        |
| rs113544984 | 10 | 96127448 | GTEEx/v8 | Adipose Visceral Omentum    | NOC3L       | A | 6.84112E-05       | 0.161311       | 0.000238073        |
| rs11187870  | 10 | 96087866 | GTEEx/v8 | Whole Blood                 | TBC1D12     | C | 6.8925E-05        | 0.222498       | 0.00686763         |
| rs11187907  | 10 | 96125361 | GTEEx/v8 | Colon Transverse            | CYP2C19     | T | 7.07444E-05       | 0.203081       | 0.023149           |
| rs79746649  | 10 | 96120218 | GTEEx/v8 | Colon Transverse            | CYP2C9      | T | 7.09602E-05       | 0.229437       | 0.0239192          |
| rs7101207   | 10 | 96122857 | GTEEx/v8 | Colon Transverse            | CYP2C9      | A | 7.09602E-05       | 0.229437       | 0.0239192          |
| rs112252876 | 10 | 96123355 | GTEEx/v8 | Colon Transverse            | CYP2C9      | T | 7.09602E-05       | 0.229437       | 0.0239192          |
| rs11187870  | 10 | 96087866 | GTEEx/v8 | Colon Transverse            | CYP2C19     | C | 7.10595E-05       | 0.207839       | 0.023149           |
| rs2274224   | 10 | 96039597 | GTEEx/v8 | Colon Transverse            | RP11-76P2.4 | C | 7.1415E-05        | 0.251217       | 2.2326E-06         |
| rs2077218   | 10 | 96071561 | GTEEx/v8 | Thyroid                     | PLCE1       | A | 7.35307E-05       | -0.140544      | 1.91428E-05        |
| rs10786156  | 10 | 96014622 | GTEEx/v8 | Colon Transverse            | RP11-76P2.4 | G | 7.37059E-05       | 0.251868       | 2.2326E-06         |
| rs3891783   | 10 | 96015793 | GTEEx/v8 | Colon Transverse            | RP11-76P2.4 | G | 7.37059E-05       | 0.251868       | 2.2326E-06         |

|             |    |          |          |                            |             |   |             |           |                    |
|-------------|----|----------|----------|----------------------------|-------------|---|-------------|-----------|--------------------|
| rs57866767  | 10 | 96023077 | GTEEx/v8 | Colon Transverse           | RP11-76P2.4 | C | 7.37059E-05 | 0.251868  | 2.2326E-06         |
| rs11187838  | 10 | 96038686 | GTEEx/v8 | Nerve Tibial               | PLCE1       | A | 7.57587E-05 | 0.131345  | 1.91043E-25        |
| rs11187838  | 10 | 96038686 | GTEEx/v8 | Skin Sun Exposed Lower leg | RP11-76P2.4 | A | 7.65039E-05 | 0.189406  | 1.123E-06          |
| rs11187895  | 10 | 96106240 | GTEEx/v8 | Whole Blood                | TBC1D12     | C | 7.77315E-05 | 0.220691  | 0.00686763         |
| rs11187897  | 10 | 96106603 | GTEEx/v8 | Whole Blood                | TBC1D12     | G | 7.77315E-05 | 0.220691  | 0.00686763         |
| rs3891783   | 10 | 96015793 | GTEEx/v8 | Artery Tibial              | RP11-76P2.4 | G | 7.82492E-05 | 0.18693   | 5.41051E-05        |
| rs57866767  | 10 | 96023077 | GTEEx/v8 | Artery Tibial              | RP11-76P2.4 | C | 7.82492E-05 | 0.18693   | 5.41051E-05        |
| rs2274224   | 10 | 96039597 | GTEEx/v8 | Nerve Tibial               | PLCE1       | C | 7.91228E-05 | 0.130521  | 1.91043E-25        |
| rs11187838  | 10 | 96038686 | GTEEx/v8 | Whole Blood                | NOC3L       | A | 7.92195E-05 | 0.0850059 | 0.000592991        |
| rs79746649  | 10 | 96120218 | GTEEx/v8 | Whole Blood                | TBC1D12     | T | 8.02709E-05 | 0.220546  | 0.00686763         |
| rs11187838  | 10 | 96038686 | GTEEx/v8 | Colon Transverse           | RP11-76P2.4 | A | 8.22798E-05 | 0.247262  | 2.2326E-06         |
| rs7080472   | 10 | 96012950 | GTEEx/v8 | Nerve Tibial               | RP11-76P2.4 | T | 8.43931E-05 | 0.183804  | 5.10248E-05        |
| rs10786156  | 10 | 96014622 | GTEEx/v8 | Artery Tibial              | RP11-76P2.4 | G | 8.49316E-05 | 0.18596   | 5.41051E-05        |
| rs11187895  | 10 | 96106240 | BIOSQTL  | BIOS eQTL geneLevel        | NOC3L       | C | 8.53708E-05 | 3.9289554 | 0.0465583340594232 |
| rs11187897  | 10 | 96106603 | BIOSQTL  | BIOS eQTL geneLevel        | NOC3L       | G | 8.53708E-05 | 3.9289554 | 0.0465583340594232 |
| rs10509672  | 10 | 96115957 | BIOSQTL  | BIOS eQTL geneLevel        | NOC3L       | C | 8.53708E-05 | 3.9289785 | 0.0465583340594232 |
| rs74825688  | 10 | 96119687 | BIOSQTL  | BIOS eQTL geneLevel        | NOC3L       | A | 8.53708E-05 | 3.9289785 | 0.0465583340594232 |
| rs79193572  | 10 | 96119713 | BIOSQTL  | BIOS eQTL geneLevel        | NOC3L       | G | 8.53708E-05 | 3.9289785 | 0.0465583340594232 |
| rs79746649  | 10 | 96120218 | BIOSQTL  | BIOS eQTL geneLevel        | NOC3L       | T | 8.53708E-05 | 3.9289785 | 0.0465583340594232 |
| rs7078844   | 10 | 96081140 | GTEEx/v8 | Cells Cultured fibroblasts | PLCE1-AS1   | C | 8.71297E-05 | -0.147185 | 3.86001E-30        |
| rs2274224   | 10 | 96039597 | GTEEx/v8 | Whole Blood                | NOC3L       | C | 8.78308E-05 | 0.084549  | 0.000592991        |
| rs11187890  | 10 | 96102758 | BIOSQTL  | BIOS eQTL geneLevel        | NOC3L       | C | 9.03293E-05 | 3.9152898 | 0.0491618170763485 |
| rs2077218   | 10 | 96071561 | GTEEx/v8 | Thyroid                    | PLCE1-AS1   | A | 9.06102E-05 | -0.143826 | 0.00721889         |
| rs10786156  | 10 | 96014622 | GTEEx/v8 | Whole Blood                | NOC3L       | G | 9.22693E-05 | 0.0845518 | 0.000592991        |
| rs778275808 | 10 | 96114212 | GTEEx/v8 | Whole Blood                | TBC1D12     | T | 9.58649E-05 | 0.218869  | 0.00686763         |
| rs10509672  | 10 | 96115957 | GTEEx/v8 | Whole Blood                | TBC1D12     | C | 9.58649E-05 | 0.218869  | 0.00686763         |
| rs11187895  | 10 | 96106240 | GTEEx/v8 | Colon Transverse           | CYP2C19     | C | 9.87863E-05 | 0.202956  | 0.023149           |
| rs11187897  | 10 | 96106603 | GTEEx/v8 | Colon Transverse           | CYP2C19     | G | 9.87863E-05 | 0.202956  | 0.023149           |
| rs11187890  | 10 | 96102758 | GTEEx/v8 | Colon Transverse           | CYP2C19     | C | 9.91947E-05 | 0.200806  | 0.023149           |
| rs11187840  | 10 | 96050351 | GTEEx/v8 | Thyroid                    | NOC3L       | G | 9.98719E-05 | -0.143413 | 0.00220997         |
| rs75017201  | 10 | 96055152 | GTEEx/v8 | Thyroid                    | NOC3L       | T | 9.98719E-05 | -0.143413 | 0.00220997         |
| rs74825688  | 10 | 96119687 | GTEEx/v8 | Whole Blood                | TBC1D12     | A | 0.000101837 | 0.217022  | 0.00686763         |
| rs10786156  | 10 | 96014622 | GTEEx/v8 | Nerve Tibial               | RP11-76P2.4 | G | 0.00010197  | 0.180963  | 5.10248E-05        |
| rs3740360   | 10 | 96025491 | GTEEx/v8 | Whole Blood                | TBC1D12     | C | 0.000102034 | 0.192773  | 0.00686763         |
| rs17109875  | 10 | 96026575 | GTEEx/v8 | Whole Blood                | TBC1D12     | C | 0.000102034 | 0.192773  | 0.00686763         |
| rs11187837  | 10 | 96035980 | GTEEx/v8 | Whole Blood                | TBC1D12     | C | 0.000102034 | 0.192773  | 0.00686763         |
| rs7080472   | 10 | 96012950 | GTEEx/v8 | Artery Tibial              | RP11-76P2.4 | T | 0.000105243 | 0.184919  | 5.41051E-05        |
| rs79193572  | 10 | 96119713 | GTEEx/v8 | Whole Blood                | TBC1D12     | G | 0.000110383 | 0.218162  | 0.00686763         |
| rs11187907  | 10 | 96125361 | GTEEx/v8 | Colon Transverse           | CYP2C9      | T | 0.000117747 | 0.218194  | 0.0239192          |
| rs11187837  | 10 | 96035980 | GTEEx/v8 | Thyroid                    | NOC3L       | C | 0.000120608 | -0.13038  | 0.00220997         |
| rs11187838  | 10 | 96038686 | GTEEx/v8 | Artery Tibial              | RP11-76P2.4 | A | 0.000121227 | 0.181833  | 5.41051E-05        |
| rs3891783   | 10 | 96015793 | GTEEx/v8 | Whole Blood                | NOC3L       | G | 0.000124756 | 0.0828281 | 0.000592991        |
| rs57866767  | 10 | 96023077 | GTEEx/v8 | Whole Blood                | NOC3L       | C | 0.000124756 | 0.0828281 | 0.000592991        |
| rs778275808 | 10 | 96114212 | GTEEx/v8 | Colon Transverse           | CYP2C9      | T | 0.000130747 | 0.223355  | 0.0239192          |
| rs10509672  | 10 | 96115957 | GTEEx/v8 | Colon Transverse           | CYP2C9      | C | 0.000130747 | 0.223355  | 0.0239192          |
| rs74825688  | 10 | 96119687 | GTEEx/v8 | Colon Transverse           | CYP2C9      | A | 0.000130747 | 0.223355  | 0.0239192          |

|             |    |          |         |                                 |             |    |             |           |             |
|-------------|----|----------|---------|---------------------------------|-------------|----|-------------|-----------|-------------|
| rs79193572  | 10 | 96119713 | GTEx/v8 | Colon Transverse                | CYP2C9      | G  | 0.000130747 | 0.223355  | 0.0239192   |
| rs113544984 | 10 | 96127448 | GTEx/v8 | Colon Transverse                | CYP2C9      | A  | 0.000130747 | 0.223355  | 0.0239192   |
| rs11187838  | 10 | 96038686 | GTEx/v8 | Colon Transverse                | CYP2C9      | A  | 0.000131607 | 0.121358  | 0.0239192   |
| rs7080472   | 10 | 96012950 | GTEx/v8 | Whole Blood                     | NOC3L       | T  | 0.000132449 | 0.0827353 | 0.000592991 |
| rs11187864  | 10 | 96082506 | GTEx/v8 | Colon Transverse                | CYP2C19     | T  | 0.000136789 | 0.197872  | 0.023149    |
| rs145707916 | 10 | 96092992 | GTEx/v8 | Colon Transverse                | CYP2C19     | GA | 0.000136789 | 0.197872  | 0.023149    |
| rs750148755 | 10 | 96095271 | GTEx/v8 | Colon Transverse                | CYP2C19     | C  | 0.000136789 | 0.197872  | 0.023149    |
| rs11187882  | 10 | 96095861 | GTEx/v8 | Colon Transverse                | CYP2C19     | C  | 0.000136789 | 0.197872  | 0.023149    |
| rs11187877  | 10 | 96092121 | GTEx/v8 | Colon Transverse                | CYP2C19     | A  | 0.00013711  | 0.195787  | 0.023149    |
| rs7078844   | 10 | 96081140 | GTEx/v8 | Skin Not Sun Exposed Suprapubic | NOC3L       | C  | 0.000137394 | 0.132453  | 2.01564E-23 |
| rs753724    | 10 | 96051417 | GTEx/v8 | Thyroid                         | NOC3L       | T  | 0.000138111 | -0.138724 | 0.00220997  |
| rs11187842  | 10 | 96052511 | GTEx/v8 | Thyroid                         | NOC3L       | T  | 0.000138111 | -0.138724 | 0.00220997  |
| rs3781266   | 10 | 96052747 | GTEx/v8 | Thyroid                         | NOC3L       | G  | 0.000138111 | -0.138724 | 0.00220997  |
| rs3740365   | 10 | 96053239 | GTEx/v8 | Thyroid                         | NOC3L       | A  | 0.000138111 | -0.138724 | 0.00220997  |
| rs12220091  | 10 | 96053689 | GTEx/v8 | Thyroid                         | NOC3L       | T  | 0.000138111 | -0.138724 | 0.00220997  |
| rs11187838  | 10 | 96038686 | GTEx/v8 | Colon Transverse                | MTND4P20    | A  | 0.000139292 | 0.116351  | 0.0452717   |
| rs11187863  | 10 | 96081457 | GTEx/v8 | Colon Transverse                | CYP2C9      | G  | 0.000141772 | 0.203738  | 0.0239192   |
| rs11187866  | 10 | 96085991 | GTEx/v8 | Colon Transverse                | CYP2C9      | G  | 0.000141772 | 0.203738  | 0.0239192   |
| rs11187883  | 10 | 96096866 | GTEx/v8 | Colon Transverse                | CYP2C9      | C  | 0.000141772 | 0.203738  | 0.0239192   |
| rs11187845  | 10 | 96060198 | GTEx/v8 | Thyroid                         | PLCE1       | A  | 0.000142332 | -0.183373 | 1.91428E-05 |
| rs11187847  | 10 | 96063440 | GTEx/v8 | Thyroid                         | PLCE1       | G  | 0.000142332 | -0.183373 | 1.91428E-05 |
| rs2274224   | 10 | 96039597 | GTEx/v8 | Nerve Tibial                    | RP11-76P2.4 | C  | 0.000156152 | 0.175538  | 5.10248E-05 |
| rs2274224   | 10 | 96039597 | GTEx/v8 | Colon Transverse                | CYP2C9      | C  | 0.000157209 | 0.1209    | 0.0239192   |
| rs752140    | 10 | 96071396 | GTEx/v8 | Colon Transverse                | CYP2C9      | T  | 0.00016468  | 0.202017  | 0.0239192   |
| rs11187838  | 10 | 96038686 | GTEx/v8 | Nerve Tibial                    | RP11-76P2.4 | A  | 0.000182236 | 0.174418  | 5.10248E-05 |
| rs2274224   | 10 | 96039597 | GTEx/v8 | Muscle Skeletal                 | CYP2C8      | C  | 0.00020384  | 0.15337   | 5.87392E-21 |
| rs753724    | 10 | 96051417 | GTEx/v8 | Thyroid                         | PLCE1       | T  | 0.000252113 | -0.173953 | 1.91428E-05 |
| rs11187842  | 10 | 96052511 | GTEx/v8 | Thyroid                         | PLCE1       | T  | 0.000252113 | -0.173953 | 1.91428E-05 |
| rs3781266   | 10 | 96052747 | GTEx/v8 | Thyroid                         | PLCE1       | G  | 0.000252113 | -0.173953 | 1.91428E-05 |
| rs3740365   | 10 | 96053239 | GTEx/v8 | Thyroid                         | PLCE1       | A  | 0.000252113 | -0.173953 | 1.91428E-05 |
| rs12220091  | 10 | 96053689 | GTEx/v8 | Thyroid                         | PLCE1       | T  | 0.000252113 | -0.173953 | 1.91428E-05 |
| rs79746649  | 10 | 96120218 | GTEx/v8 | Thyroid                         | NOC3L       | T  | 0.000260305 | -0.141234 | 0.00220997  |
| rs10786156  | 10 | 96014622 | GTEx/v8 | Muscle Skeletal                 | CYP2C8      | G  | 0.000285424 | 0.150035  | 5.87392E-21 |
| rs3891783   | 10 | 96015793 | GTEx/v8 | Muscle Skeletal                 | CYP2C8      | G  | 0.000318235 | 0.148928  | 5.87392E-21 |
| rs57866767  | 10 | 96023077 | GTEx/v8 | Muscle Skeletal                 | CYP2C8      | C  | 0.000318235 | 0.148928  | 5.87392E-21 |
| rs11187826  | 10 | 95988042 | CMC     | CMC SVA cis                     | NOC3L       | G  |             | 1.0       | 0.049       |
| rs7080472   | 10 | 96012950 | CMC     | CMC SVA cis                     | NOC3L       | T  |             | 1.0       | 0.009       |
| rs10786156  | 10 | 96014622 | CMC     | CMC SVA cis                     | NOC3L       | G  |             | 1.0       | 0.009       |
| rs3891783   | 10 | 96015793 | CMC     | CMC SVA cis                     | NOC3L       | G  |             | 1.0       | 0.009       |
| rs57866767  | 10 | 96023077 | CMC     | CMC SVA cis                     | NOC3L       | C  |             | 1.0       | 0.009       |
| rs3740360   | 10 | 96025491 | CMC     | CMC SVA cis                     | NOC3L       | C  |             | 1.0       | 0.049       |
| rs17109875  | 10 | 96026575 | CMC     | CMC SVA cis                     | NOC3L       | C  |             | 1.0       | 0.049       |
| rs11187837  | 10 | 96035980 | CMC     | CMC SVA cis                     | NOC3L       | C  |             | 1.0       | 0.049       |
| rs11187838  | 10 | 96038686 | CMC     | CMC SVA cis                     | NOC3L       | A  |             | 1.0       | 0.009       |
| rs2274224   | 10 | 96039597 | CMC     | CMC SVA cis                     | NOC3L       | C  |             | 1.0       | 0.009       |

|                           |    |          |     |                |       |    |  |     |       |
|---------------------------|----|----------|-----|----------------|-------|----|--|-----|-------|
| rs769015184               | 10 | 96049708 | CMC | CMC SVA<br>cis | NOC3L | A  |  | 1.0 | 0.009 |
| rs11187840                | 10 | 96050351 | CMC | CMC SVA<br>cis | NOC3L | G  |  | 1.0 | 0.009 |
| rs753724                  | 10 | 96051417 | CMC | CMC SVA<br>cis | NOC3L | T  |  | 1.0 | 0.009 |
| rs11187842                | 10 | 96052511 | CMC | CMC SVA<br>cis | NOC3L | T  |  | 1.0 | 0.009 |
| rs3781266                 | 10 | 96052747 | CMC | CMC SVA<br>cis | NOC3L | G  |  | 1.0 | 0.009 |
| rs3740365                 | 10 | 96053239 | CMC | CMC SVA<br>cis | NOC3L | A  |  | 1.0 | 0.009 |
| rs12220091                | 10 | 96053689 | CMC | CMC SVA<br>cis | NOC3L | T  |  | 1.0 | 0.009 |
| rs75017201                | 10 | 96055152 | CMC | CMC SVA<br>cis | NOC3L | T  |  | 1.0 | 0.009 |
| rs200197176               | 10 | 96055963 | CMC | CMC SVA<br>cis | NOC3L | CA |  | 1.0 | 0.009 |
| rs11187844                | 10 | 96056629 | CMC | CMC SVA<br>cis | NOC3L | A  |  | 1.0 | 0.009 |
| rs11187845                | 10 | 96060198 | CMC | CMC SVA<br>cis | NOC3L | A  |  | 1.0 | 0.009 |
| rs34309017                | 10 | 96061619 | CMC | CMC SVA<br>cis | NOC3L | A  |  | 1.0 | 0.009 |
| rs12217792                | 10 | 96062386 | CMC | CMC SVA<br>cis | NOC3L | C  |  | 1.0 | 0.009 |
| rs11187847                | 10 | 96063440 | CMC | CMC SVA<br>cis | NOC3L | G  |  | 1.0 | 0.009 |
| rs7096883                 | 10 | 96069149 | CMC | CMC SVA<br>cis | NOC3L | A  |  | 1.0 | 0.009 |
| rs7100626                 | 10 | 96069674 | CMC | CMC SVA<br>cis | NOC3L | A  |  | 1.0 | 0.009 |
| rs11187852                | 10 | 96070132 | CMC | CMC SVA<br>cis | NOC3L | A  |  | 1.0 | 0.009 |
| rs752140                  | 10 | 96071396 | CMC | CMC SVA<br>cis | NOC3L | T  |  | 1.0 | 0.009 |
| rs75409190                | 10 | 96072425 | CMC | CMC SVA<br>cis | NOC3L | T  |  | 1.0 | 0.009 |
| rs771106747               | 10 | 96072873 | CMC | CMC SVA<br>cis | NOC3L | C  |  | 1.0 | 0.009 |
| rs749295068               | 10 | 96073508 | CMC | CMC SVA<br>cis | NOC3L | A  |  | 1.0 | 0.009 |
| rs11187856                | 10 | 96076869 | CMC | CMC SVA<br>cis | NOC3L | A  |  | 1.0 | 0.009 |
| rs7078844                 | 10 | 96081140 | CMC | CMC SVA<br>cis | HELLS | T  |  | 1.0 | 0.049 |
| rs11187863                | 10 | 96081457 | CMC | CMC SVA<br>cis | NOC3L | G  |  | 1.0 | 0.009 |
| rs11187864                | 10 | 96082506 | CMC | CMC SVA<br>cis | NOC3L | T  |  | 1.0 | 0.009 |
| rs11187866                | 10 | 96085991 | CMC | CMC SVA<br>cis | NOC3L | G  |  | 1.0 | 0.009 |
| rs11187870                | 10 | 96087866 | CMC | CMC SVA<br>cis | NOC3L | C  |  | 1.0 | 0.009 |
| rs11187877                | 10 | 96092121 | CMC | CMC SVA<br>cis | NOC3L | A  |  | 1.0 | 0.009 |
| rs145707916               | 10 | 96092992 | CMC | CMC SVA<br>cis | NOC3L | GA |  | 1.0 | 0.009 |
| rs750148755               | 10 | 96095271 | CMC | CMC SVA<br>cis | NOC3L | C  |  | 1.0 | 0.009 |
| rs11187882                | 10 | 96095861 | CMC | CMC SVA<br>cis | NOC3L | C  |  | 1.0 | 0.009 |
| rs11187883                | 10 | 96096866 | CMC | CMC SVA<br>cis | NOC3L | C  |  | 1.0 | 0.009 |
| rs3740359                 | 10 | 96100119 | CMC | CMC SVA<br>cis | NOC3L | T  |  | 1.0 | 0.009 |
| rs11187890                | 10 | 96102758 | CMC | CMC SVA<br>cis | NOC3L | C  |  | 1.0 | 0.009 |
| rs11187895                | 10 | 96106240 | CMC | CMC SVA<br>cis | NOC3L | C  |  | 1.0 | 0.009 |
| rs11187897                | 10 | 96106603 | CMC | CMC SVA<br>cis | NOC3L | G  |  | 1.0 | 0.009 |
| 10:96112261_A<br>AAAAAC_A | 10 | 96112261 | CMC | CMC SVA<br>cis | NOC3L | A  |  | 1.0 | 0.009 |
| rs778275808               | 10 | 96114212 | CMC | CMC SVA<br>cis | NOC3L | T  |  | 1.0 | 0.009 |
| rs10509672                | 10 | 96115957 | CMC | CMC SVA<br>cis | NOC3L | C  |  | 1.0 | 0.009 |
| rs74825688                | 10 | 96119687 | CMC | CMC SVA<br>cis | NOC3L | A  |  | 1.0 | 0.009 |
| rs79193572                | 10 | 96119713 | CMC | CMC SVA<br>cis | NOC3L | G  |  | 1.0 | 0.009 |
| rs79746649                | 10 | 96120218 | CMC | CMC SVA<br>cis | NOC3L | T  |  | 1.0 | 0.009 |
| rs7101207                 | 10 | 96122857 | CMC | CMC SVA<br>cis | NOC3L | A  |  | 1.0 | 0.009 |

|             |    |          |     |                  |       |    |  |     |       |
|-------------|----|----------|-----|------------------|-------|----|--|-----|-------|
| rs112252876 | 10 | 96123355 | CMC | CMC SVA<br>cis   | NOC3L | T  |  | 1.0 | 0.009 |
| rs11187906  | 10 | 96124838 | CMC | CMC SVA<br>cis   | NOC3L | A  |  | 1.0 | 0.009 |
| rs11187907  | 10 | 96125361 | CMC | CMC SVA<br>cis   | NOC3L | T  |  | 1.0 | 0.009 |
| rs113544984 | 10 | 96127448 | CMC | CMC SVA<br>cis   | NOC3L | A  |  | 1.0 | 0.009 |
| rs7080472   | 10 | 96012950 | CMC | CMC NoSVA<br>cis | PLCE1 | T  |  | 1.0 | 0.049 |
| rs7080472   | 10 | 96012950 | CMC | CMC NoSVA<br>cis | NOC3L | T  |  | 1.0 | 0.049 |
| rs10786156  | 10 | 96014622 | CMC | CMC NoSVA<br>cis | PLCE1 | G  |  | 1.0 | 0.049 |
| rs10786156  | 10 | 96014622 | CMC | CMC NoSVA<br>cis | NOC3L | G  |  | 1.0 | 0.009 |
| rs3891783   | 10 | 96015793 | CMC | CMC NoSVA<br>cis | PLCE1 | G  |  | 1.0 | 0.049 |
| rs3891783   | 10 | 96015793 | CMC | CMC NoSVA<br>cis | NOC3L | G  |  | 1.0 | 0.009 |
| rs57866767  | 10 | 96023077 | CMC | CMC NoSVA<br>cis | PLCE1 | C  |  | 1.0 | 0.049 |
| rs57866767  | 10 | 96023077 | CMC | CMC NoSVA<br>cis | NOC3L | C  |  | 1.0 | 0.009 |
| rs11187838  | 10 | 96038686 | CMC | CMC NoSVA<br>cis | PLCE1 | A  |  | 1.0 | 0.049 |
| rs11187838  | 10 | 96038686 | CMC | CMC NoSVA<br>cis | NOC3L | A  |  | 1.0 | 0.009 |
| rs2274224   | 10 | 96039597 | CMC | CMC NoSVA<br>cis | PLCE1 | C  |  | 1.0 | 0.049 |
| rs2274224   | 10 | 96039597 | CMC | CMC NoSVA<br>cis | NOC3L | C  |  | 1.0 | 0.009 |
| rs769015184 | 10 | 96049708 | CMC | CMC NoSVA<br>cis | NOC3L | A  |  | 1.0 | 0.049 |
| rs11187840  | 10 | 96050351 | CMC | CMC NoSVA<br>cis | NOC3L | G  |  | 1.0 | 0.049 |
| rs753724    | 10 | 96051417 | CMC | CMC NoSVA<br>cis | NOC3L | T  |  | 1.0 | 0.049 |
| rs11187842  | 10 | 96052511 | CMC | CMC NoSVA<br>cis | NOC3L | T  |  | 1.0 | 0.049 |
| rs3781266   | 10 | 96052747 | CMC | CMC NoSVA<br>cis | NOC3L | G  |  | 1.0 | 0.049 |
| rs3740365   | 10 | 96053239 | CMC | CMC NoSVA<br>cis | NOC3L | A  |  | 1.0 | 0.049 |
| rs12220091  | 10 | 96053689 | CMC | CMC NoSVA<br>cis | NOC3L | T  |  | 1.0 | 0.049 |
| rs75017201  | 10 | 96055152 | CMC | CMC NoSVA<br>cis | NOC3L | T  |  | 1.0 | 0.049 |
| rs200197176 | 10 | 96055963 | CMC | CMC NoSVA<br>cis | NOC3L | CA |  | 1.0 | 0.009 |
| rs11187845  | 10 | 96060198 | CMC | CMC NoSVA<br>cis | NOC3L | A  |  | 1.0 | 0.049 |
| rs34309017  | 10 | 96061619 | CMC | CMC NoSVA<br>cis | NOC3L | A  |  | 1.0 | 0.049 |
| rs12217792  | 10 | 96062386 | CMC | CMC NoSVA<br>cis | NOC3L | C  |  | 1.0 | 0.049 |
| rs11187847  | 10 | 96063440 | CMC | CMC NoSVA<br>cis | NOC3L | G  |  | 1.0 | 0.049 |
| rs7096883   | 10 | 96069149 | CMC | CMC NoSVA<br>cis | NOC3L | A  |  | 1.0 | 0.049 |
| rs7100626   | 10 | 96069674 | CMC | CMC NoSVA<br>cis | NOC3L | A  |  | 1.0 | 0.049 |
| rs11187852  | 10 | 96070132 | CMC | CMC NoSVA<br>cis | NOC3L | A  |  | 1.0 | 0.049 |
| rs752140    | 10 | 96071396 | CMC | CMC NoSVA<br>cis | NOC3L | T  |  | 1.0 | 0.049 |
| rs75409190  | 10 | 96072425 | CMC | CMC NoSVA<br>cis | NOC3L | T  |  | 1.0 | 0.049 |
| rs771106747 | 10 | 96072873 | CMC | CMC NoSVA<br>cis | NOC3L | C  |  | 1.0 | 0.049 |
| rs749295068 | 10 | 96073508 | CMC | CMC NoSVA<br>cis | NOC3L | A  |  | 1.0 | 0.049 |
| rs11187856  | 10 | 96076869 | CMC | CMC NoSVA<br>cis | NOC3L | A  |  | 1.0 | 0.049 |
| rs11187863  | 10 | 96081457 | CMC | CMC NoSVA<br>cis | NOC3L | G  |  | 1.0 | 0.049 |
| rs11187864  | 10 | 96082506 | CMC | CMC NoSVA<br>cis | NOC3L | T  |  | 1.0 | 0.049 |
| rs11187866  | 10 | 96085991 | CMC | CMC NoSVA<br>cis | NOC3L | G  |  | 1.0 | 0.049 |
| rs11187870  | 10 | 96087866 | CMC | CMC NoSVA<br>cis | NOC3L | C  |  | 1.0 | 0.049 |
| rs11187877  | 10 | 96092121 | CMC | CMC NoSVA<br>cis | NOC3L | A  |  | 1.0 | 0.049 |
| rs145707916 | 10 | 96092992 | CMC | CMC NoSVA<br>cis | NOC3L | GA |  | 1.0 | 0.049 |

|                            |    |          |         |                     |               |   |                              |            |       |
|----------------------------|----|----------|---------|---------------------|---------------|---|------------------------------|------------|-------|
| rs750148755                | 10 | 96095271 | CMC     | CMC NoSVA cis       | NOC3L         | C |                              | 1.0        | 0.049 |
| rs11187882                 | 10 | 96095861 | CMC     | CMC NoSVA cis       | NOC3L         | C |                              | 1.0        | 0.049 |
| rs11187883                 | 10 | 96096866 | CMC     | CMC NoSVA cis       | NOC3L         | C |                              | 1.0        | 0.049 |
| rs3740359                  | 10 | 96100119 | CMC     | CMC NoSVA cis       | NOC3L         | T |                              | 1.0        | 0.049 |
| rs11187890                 | 10 | 96102758 | CMC     | CMC NoSVA cis       | NOC3L         | C |                              | 1.0        | 0.049 |
| rs11187895                 | 10 | 96106240 | CMC     | CMC NoSVA cis       | NOC3L         | C |                              | 1.0        | 0.049 |
| rs11187897                 | 10 | 96106603 | CMC     | CMC NoSVA cis       | NOC3L         | G |                              | 1.0        | 0.049 |
| 10:96112261_A<br>AAAAAAC A | 10 | 96112261 | CMC     | CMC NoSVA cis       | NOC3L         | A |                              | 1.0        | 0.049 |
| rs778275808                | 10 | 96114212 | CMC     | CMC NoSVA cis       | NOC3L         | T |                              | 1.0        | 0.049 |
| rs10509672                 | 10 | 96115957 | CMC     | CMC NoSVA cis       | NOC3L         | C |                              | 1.0        | 0.049 |
| rs74825688                 | 10 | 96119687 | CMC     | CMC NoSVA cis       | NOC3L         | A |                              | 1.0        | 0.049 |
| rs79193572                 | 10 | 96119713 | CMC     | CMC NoSVA cis       | NOC3L         | G |                              | 1.0        | 0.049 |
| rs79746649                 | 10 | 96120218 | CMC     | CMC NoSVA cis       | NOC3L         | T |                              | 1.0        | 0.049 |
| rs7101207                  | 10 | 96122857 | CMC     | CMC NoSVA cis       | NOC3L         | A |                              | 1.0        | 0.049 |
| rs112252876                | 10 | 96123355 | CMC     | CMC NoSVA cis       | NOC3L         | T |                              | 1.0        | 0.049 |
| rs11187906                 | 10 | 96124838 | CMC     | CMC NoSVA cis       | NOC3L         | A |                              | 1.0        | 0.049 |
| rs11187907                 | 10 | 96125361 | CMC     | CMC NoSVA cis       | NOC3L         | T |                              | 1.0        | 0.049 |
| rs113544984                | 10 | 96127448 | CMC     | CMC NoSVA cis       | NOC3L         | A |                              | 1.0        | 0.049 |
| rs16968876                 | 15 | 39636877 | eQTLGen | eQTLGen cis eQTLs   | THBS1         | C | 3.7769E-210                  | -30.9371   | 0.0   |
| rs16968890                 | 15 | 39638991 | eQTLGen | eQTLGen cis eQTLs   | THBS1         | G | 1.0259E-208                  | -30.8304   | 0.0   |
| rs3910645                  | 15 | 39648251 | eQTLGen | eQTLGen cis eQTLs   | THBS1         | G | 2.2440999999999999998E-203   | -30.4294   | 0.0   |
| rs3910644                  | 15 | 39648234 | eQTLGen | eQTLGen cis eQTLs   | THBS1         | C | 1.0002E-196                  | -29.9225   | 0.0   |
| rs11638679                 | 15 | 39640148 | eQTLGen | eQTLGen cis eQTLs   | THBS1         | T | 1.1882E-85                   | -19.6133   | 0.0   |
| rs34680120                 | 15 | 39664000 | eQTLGen | eQTLGen cis eQTLs   | THBS1         | A | 3.1042E-38                   | -12.9284   | 0.0   |
| rs4566132                  | 15 | 39661138 | eQTLGen | eQTLGen cis eQTLs   | THBS1         | G | 6.7617E-38                   | -12.8684   | 0.0   |
| rs1837636                  | 15 | 39661779 | eQTLGen | eQTLGen cis eQTLs   | THBS1         | C | 3.454199999999999999998E-37  | -12.7419   | 0.0   |
| rs72722976                 | 15 | 39624864 | eQTLGen | eQTLGen cis eQTLs   | THBS1         | G | 3.3560000000000000000004E-36 | 1,3649E+06 | 0.0   |
| rs12592015                 | 15 | 39628131 | eQTLGen | eQTLGen cis eQTLs   | THBS1         | A | 9.8428E-36                   | 1,0526E+06 | 0.0   |
| rs3910644                  | 15 | 39648234 | BIOSQTL | BIOS eQTL geneLevel | THBS1         | C | 1.35871E-34                  | -12.2671   | 0.0   |
| rs3910644                  | 15 | 39648234 | BIOSQTL | BIOS eQTL geneLevel | CTD-2033D15.1 | C | 1.35871E-34                  | -12.2671   | 0.0   |
| rs3910645                  | 15 | 39648251 | BIOSQTL | BIOS eQTL geneLevel | THBS1         | G | 1.7692400000000000000001E-34 | -12.2457   | 0.0   |
| rs3910645                  | 15 | 39648251 | BIOSQTL | BIOS eQTL geneLevel | CTD-2033D15.1 | G | 1.7692400000000000000001E-34 | -12.2457   | 0.0   |
| rs1440802                  | 15 | 39635124 | eQTLGen | eQTLGen cis eQTLs   | THBS1         | C | 2.7421E-34                   | -12.2101   | 0.0   |
| rs28520337                 | 15 | 39647894 | eQTLGen | eQTLGen cis eQTLs   | THBS1         | C | 6.0685000000000000000004E-34 | -12.1453   | 0.0   |
| rs71471500                 | 15 | 39632013 | eQTLGen | eQTLGen cis eQTLs   | THBS1         | G | 2.7098000000000000000002E-33 | -12.0223   | 0.0   |
| rs11639391                 | 15 | 39631771 | eQTLGen | eQTLGen cis eQTLs   | THBS1         | T | 7.3753E-33                   | -11.9392   | 0.0   |
| rs7182018                  | 15 | 39632269 | eQTLGen | eQTLGen cis eQTLs   | THBS1         | G | 1.5586E-32                   | -11.8769   | 0.0   |
| rs17694988                 | 15 | 39636227 | eQTLGen | eQTLGen cis eQTLs   | THBS1         | C | 1.9747E-32                   | -11.857    | 0.0   |
| rs4924346                  | 15 | 39639992 | eQTLGen | eQTLGen cis eQTLs   | THBS1         | A | 4.3746E-32                   | -11.7902   | 0.0   |
| rs4924345                  | 15 | 39639898 | eQTLGen | eQTLGen cis eQTLs   | THBS1         | C | 7.2122E-31                   | -11.5519   | 0.0   |
| rs1080066                  | 15 | 39634222 | eQTLGen | eQTLGen cis eQTLs   | THBS1         | G | 7.6265000000000000000005E-31 | -11.547    | 0.0   |
| rs2033939                  | 15 | 39633904 | eQTLGen | eQTLGen cis eQTLs   | THBS1         | A | 9.0583E-31                   | -11.5322   | 0.0   |



|             |    |          |               |                       |               |       |                        |          |                      |
|-------------|----|----------|---------------|-----------------------|---------------|-------|------------------------|----------|----------------------|
| rs4923822   | 15 | 39662277 | eQTLGen       | eQTLGen cis eQTLs     | THBS1         | A     | 1.8796000000000002E-30 | -11.4694 | 0.0                  |
| rs978740    | 15 | 39655920 | eQTLGen       | eQTLGen cis eQTLs     | THBS1         | C     | 6.1505E-28             | -10.9568 | 0.0                  |
| rs16968890  | 15 | 39638991 | BIOSQTL       | BIOS eQTL geneLevel   | THBS1         | G     | 9.96844E-28            | -10.913  | 0.0                  |
| rs16968890  | 15 | 39638991 | BIOSQTL       | BIOS eQTL geneLevel   | CTD-2033D15.1 | G     | 9.96844E-28            | -10.913  | 0.0                  |
| rs16968876  | 15 | 39636877 | BIOSQTL       | BIOS eQTL geneLevel   | THBS1         | C     | 1.23112E-27            | -10.8939 | 0.0                  |
| rs16968876  | 15 | 39636877 | BIOSQTL       | BIOS eQTL geneLevel   | CTD-2033D15.1 | C     | 1.23112E-27            | -10.8939 | 0.0                  |
| rs3910644   | 15 | 39648234 | eQTLcatalogue | Fairfax 2014 naive    | THBS1         | C     | 3.20905E-14            | 0.848997 | 1.60452E-10          |
| rs3910645   | 15 | 39648251 | eQTLcatalogue | Fairfax 2014 naive    | THBS1         | G     | 2.42235E-13            | 0.823476 | 1.21117E-09          |
| rs16968890  | 15 | 39638991 | eQTLcatalogue | Fairfax 2014 naive    | THBS1         | G     | 4.96976E-13            | 0.793931 | 2.48488E-09          |
| rs16968876  | 15 | 39636877 | eQTLcatalogue | Fairfax 2014 naive    | THBS1         | C     | 5.2124E-13             | 0.796074 | 2.6062E-09           |
| rs773225188 | 15 | 39631994 | eQTLcatalogue | Fairfax 2014 naive    | THBS1         | AAGAG | 7.77307E-13            | 0.78881  | 3.88653E-09          |
| rs56003663  | 15 | 39617295 | eQTLGen       | eQTLGen cis eQTLs     | THBS1         | C     | 9.5054E-12             | -6.8136  | 0.0                  |
| rs4923822   | 15 | 39662277 | BIOSQTL       | BIOS eQTL geneLevel   | CTD-2033D15.1 | A     | 1.42704E-09            | -6.05233 | 6.12782645995465E-06 |
| rs4923822   | 15 | 39662277 | BIOSQTL       | BIOS eQTL geneLevel   | THBS1         | A     | 1.98781E-09            | -5.99861 | 6.08309507877608E-06 |
| rs4566132   | 15 | 39661138 | BIOSQTL       | BIOS eQTL geneLevel   | THBS1         | G     | 2.82253E-09            | -5.94143 | 6.03937673632081E-06 |
| rs4566132   | 15 | 39661138 | BIOSQTL       | BIOS eQTL geneLevel   | CTD-2033D15.1 | G     | 2.82253E-09            | -5.94143 | 6.03937673632081E-06 |
| rs1837636   | 15 | 39661779 | BIOSQTL       | BIOS eQTL geneLevel   | THBS1         | C     | 2.82253E-09            | -5.94143 | 6.03937673632081E-06 |
| rs1837636   | 15 | 39661779 | BIOSQTL       | BIOS eQTL geneLevel   | CTD-2033D15.1 | C     | 2.82253E-09            | -5.94143 | 6.03937673632081E-06 |
| rs34680120  | 15 | 39664000 | BIOSQTL       | BIOS eQTL geneLevel   | THBS1         | A     | 2.82253E-09            | -5.94143 | 6.03937673632081E-06 |
| rs34680120  | 15 | 39664000 | BIOSQTL       | BIOS eQTL geneLevel   | CTD-2033D15.1 | A     | 2.82253E-09            | -5.94143 | 6.03937673632081E-06 |
| rs11638679  | 15 | 39640148 | eQTLGen       | eQTLGen cis eQTLs     | C15orf54      | T     | 8.0695E-09             | -5.7669  | 5.79822187862389E-05 |
| rs11638016  | 15 | 39621773 | eQTLGen       | eQTLGen cis eQTLs     | THBS1         | C     | 1.8572E-08             | -5.6248  | 9.58466453674121E-05 |
| rs56113415  | 15 | 39621418 | eQTLGen       | eQTLGen cis eQTLs     | THBS1         | A     | 3.7254E-08             | -5.5033  | 0.0001523035918263   |
| rs11638679  | 15 | 39640148 | BIOSQTL       | BIOS eQTL geneLevel   | THBS1         | T     | 6.41607E-08            | -5.40673 | 5.63443768311922E-05 |
| rs11638679  | 15 | 39640148 | BIOSQTL       | BIOS eQTL geneLevel   | CTD-2033D15.1 | T     | 6.41607E-08            | -5.40673 | 5.63443768311922E-05 |
| rs3910645   | 15 | 39648251 | eQTLcatalogue | BLUEPRINT ge monocyte | THBS1         | G     | 7.11506E-08            | 0.845224 | 0.000355753          |
| rs3910644   | 15 | 39648234 | eQTLcatalogue | BLUEPRINT ge monocyte | THBS1         | C     | 7.90024E-08            | 0.84269  | 0.000395012          |
| rs2033939   | 15 | 39633904 | BIOSQTL       | BIOS eQTL geneLevel   | THBS1         | A     | 1.39884E-07            | -5.26522 | 8.847600088476E-05   |
| rs8032326   | 15 | 39619456 | eQTLGen       | eQTLGen cis eQTLs     | THBS1         | A     | 1.8283E-07             | -5.2159  | 0.0006118881118881   |
| rs8033007   | 15 | 39619661 | eQTLGen       | eQTLGen cis eQTLs     | THBS1         | C     | 3.8506E-07             | -5.0762  | 0.0012003464917708   |
| rs1080066   | 15 | 39634222 | BIOSQTL       | BIOS eQTL geneLevel   | THBS1         | G     | 5.84104E-07            | -4.99636 | 0.0005052116570942   |
| rs28520337  | 15 | 39647894 | BIOSQTL       | BIOS eQTL geneLevel   | THBS1         | C     | 6.5653E-07             | -4.97369 | 0.0005301664722722   |
| rs28520337  | 15 | 39647894 | BIOSQTL       | BIOS eQTL geneLevel   | CTD-2033D15.1 | C     | 6.5653E-07             | -4.97369 | 0.0005301664722722   |
| rs16968890  | 15 | 39638991 | eQTLcatalogue | BLUEPRINT ge monocyte | THBS1         | G     | 7.00785E-07            | 0.796662 | 0.00350393           |
| rs12591944  | 15 | 39627982 | eQTLGen       | eQTLGen cis eQTLs     | THBS1         | C     | 1.2149E-06             | -4.853   | 0.0036831175177131   |
| rs1440802   | 15 | 39635124 | BIOSQTL       | BIOS eQTL geneLevel   | THBS1         | C     | 1.53212E-06            | -4.80687 | 0.0012847743874009   |
| rs72722978  | 15 | 39628675 | eQTLGen       | eQTLGen cis eQTLs     | THBS1         | T     | 1.7935E-06             | -4.7753  | 0.0053233558435237   |
| rs8025239   | 15 | 39623588 | eQTLGen       | eQTLGen cis eQTLs     | THBS1         | A     | 2.0892E-06             | -4.7445  | 0.0060943006440636   |

|             |    |          |               |                         |               |       |                   |               |                       |
|-------------|----|----------|---------------|-------------------------|---------------|-------|-------------------|---------------|-----------------------|
| rs16968890  | 15 | 39638991 | eQTLcatalogue | Fairfax 2014 LPS24      | THBS1         | G     | 2.28413E-06       | 0.227449      | 0.0114206             |
| rs4924345   | 15 | 39639898 | BIOSQTL       | BIOS eQTL geneLevel     | THBS1         | C     | 2.33078E-06       | -4.72221      | 0.0017824310520939    |
| rs4924345   | 15 | 39639898 | BIOSQTL       | BIOS eQTL geneLevel     | CTD-2033D15.1 | C     | 2.33078E-06       | -4.72221      | 0.0017824310520939    |
| rs16968876  | 15 | 39636877 | eQTLcatalogue | Fairfax 2014 LPS24      | THBS1         | C     | 2.85595E-06       | 0.225868      | 0.0142798             |
| rs16968876  | 15 | 39636877 | eQTLcatalogue | BLUEPRINT gene monocyte | THBS1         | C     | 2.8667E-06        | 0.752794      | 0.0143335             |
| rs773225188 | 15 | 39631994 | eQTLcatalogue | Fairfax 2014 LPS24      | THBS1         | AAGAG | 3.7226E-06        | 0.222135      | 0.018613              |
| rs3910644   | 15 | 39648234 | GTEXv8        | Whole Blood             | THBS1         | T     | 4.45129E-06       | 0.127755      | 3.815319999999997E-20 |
| rs1837636   | 15 | 39661779 | PsychENCODE   | PsychENCODE eQTLs       | RP11-37C7.1   | T     | 5.27257E-06       | -0.222586     | 0.0006116329885143    |
| rs3910644   | 15 | 39648234 | eQTLcatalogue | Fairfax 2014 IFN24      | THBS1         | C     | 5.33505E-06       | 0.461593      | 0.0266752             |
| rs10520128  | 15 | 39627146 | eQTLGen       | eQTLGen cis eQTLs       | THBS1         | C     | 7.0029E-06        | -4.4934       | 0.0199808623886131    |
| rs11629938  | 15 | 39626935 | eQTLGen       | eQTLGen cis eQTLs       | THBS1         | A     | 8.6916E-06        | -4.4473       | 0.0246107963018193    |
| rs34680120  | 15 | 39664000 | PsychENCODE   | PsychENCODE eQTLs       | RP11-37C7.1   | A     | 9.31429E-06       | 0.216218      | 0.0010235897899314    |
| rs16968890  | 15 | 39638991 | eQTLcatalogue | Fairfax 2014 IFN24      | THBS1         | G     | 9.51089E-06       | 0.431862      | 0.0475544             |
| rs3910644   | 15 | 39648234 | eQTLcatalogue | BLUEPRINT gene monocyte | RP11-624L4.1  | C     | 9.5575E-06        | 0.327274      | 0.0477875             |
| rs4924346   | 15 | 39639992 | BIOSQTL       | BIOS eQTL geneLevel     | THBS1         | A     | 2.08303E-05       | -4.25569      | 0.0133721749753324    |
| rs4924346   | 15 | 39639992 | BIOSQTL       | BIOS eQTL geneLevel     | CTD-2033D15.1 | A     | 2.08303E-05       | -4.25569      | 0.0133721749753324    |
| rs16968876  | 15 | 39636877 | GTEXv8        | Whole Blood             | THBS1         | T     | 2.227E-05         | 0.119692      | 3.815319999999997E-20 |
| rs17694988  | 15 | 39636227 | BIOSQTL       | BIOS eQTL geneLevel     | THBS1         | C     | 2.25922E-05       | -4.23748      | 0.014281031980147     |
| rs17694988  | 15 | 39636227 | BIOSQTL       | BIOS eQTL geneLevel     | CTD-2033D15.1 | C     | 2.25922E-05       | -4.23748      | 0.014281031980147     |
| rs12592015  | 15 | 39628131 | DICE          | T CD4 naive             | PAK6          | A     | 2.38152860034E-05 | 1.15860040249 | 0.049                 |
| rs773225188 | 15 | 39631994 | GTEXv8        | Whole Blood             | THBS1         | A     | 2.69055E-05       | 0.11834       | 3.815319999999997E-20 |
| rs16968890  | 15 | 39638991 | GTEXv8        | Whole Blood             | THBS1         | C     | 3.04173E-05       | 0.118313      | 3.815319999999997E-20 |
| rs3910645   | 15 | 39648251 | GTEXv8        | Whole Blood             | THBS1         | C     | 3.82701E-05       | 0.115051      | 3.815319999999997E-20 |
| rs4923822   | 15 | 39662277 | PsychENCODE   | PsychENCODE eQTLs       | RP11-37C7.1   | G     | 4.82356E-05       | -0.204656     | 0.0044418712164       |
| rs8032326   | 15 | 39619456 | PsychENCODE   | PsychENCODE eQTLs       | RP11-37C7.1   | A     | 0.000314673       | 0.162609      | 0.0224872458661352    |
| rs2033939   | 15 | 39633904 | PsychENCODE   | PsychENCODE eQTLs       | RP11-37C7.1   | A     | 0.000399035       | 0.157412      | 0.0274319167847911    |

Center of mass of the language processing regions of interests retained in both left and right hemispheres. Each ROIs is characterized by their abbreviated anatomical label and their center of mass stereotactic coordinates (x, y, z, in mm)

| Hemisphere       | ROIs        | x          | y          | z          |
|------------------|-------------|------------|------------|------------|
| Left hemisphere  | Prec        | -46.763359 | 2.010178   | 25.857506  |
|                  | RoIS        | -45.287982 | -9.405896  | 44.176871  |
|                  | F3orb       | -35.821290 | 35.303807  | -10.772339 |
|                  | T3p         | -45.903226 | -56.483871 | -7.359447  |
|                  | F3td        | -42.150235 | 25.107981  | 14.544601  |
|                  | T2p         | -39.306773 | -65.254980 | 2.051793   |
|                  | SMG         | -40.684932 | -50.252055 | 40.865753  |
|                  | T1a         | -54.076294 | -11.858311 | -5.858311  |
|                  | F3tv        | -45.202073 | 14.242228  | 4.231865   |
|                  | STSp        | -47.122995 | -56.926916 | 24.071301  |
|                  | PrF3op      | -39.616883 | 2.909091   | 39.344156  |
|                  | Fusa        | -35.273273 | -37.173173 | -12.890891 |
|                  | T1          | -50.465171 | -38.564345 | 14.323495  |
|                  | T2ml        | -54.990991 | -39.625225 | -2.846847  |
|                  | F2p         | -34.726790 | 10.944297  | 48.801061  |
|                  | F3opd       | -43.908772 | 21.976608  | 25.702924  |
|                  | PT          | -59.899083 | -28.119266 | 8.678899   |
|                  | Pole        | -45.000000 | 5.196759   | -26.796296 |
| AG               | -43.936872  | -70.852224 | 22.203730  |            |
| Right hemisphere | T1R         | 51.842553  | -38.519149 | 3.404255   |
|                  | F3opdR      | 49.679389  | 14.931298  | 27.480916  |
|                  | F2antR      | 46.641026  | 39.807692  | 5.064103   |
|                  | T2pR        | 54.768421  | -42.115789 | -7.736842  |
|                  | T1a/HeschlR | 56.540260  | -13.387013 | 0.815584   |
|                  | PrecR       | 52.686275  | -1.490196  | 24.156863  |
